# Supplementary material for: Parabacteroides distasonis uses dietary inulin to suppress NASH via its metabolite pentadecanoic acid
Source: PubMed Central journal article supplement (PMC10390331; doi:10.1038/s41564-023-01418-7), 2023-06-29

## Source images for Figure 1

Including H&E staining and sirius red staining  
Replicate images from a same mouse were  
displayed within a same page

**H&E Staining**

**NCD group**

(10 mice were included)

# NCD-1

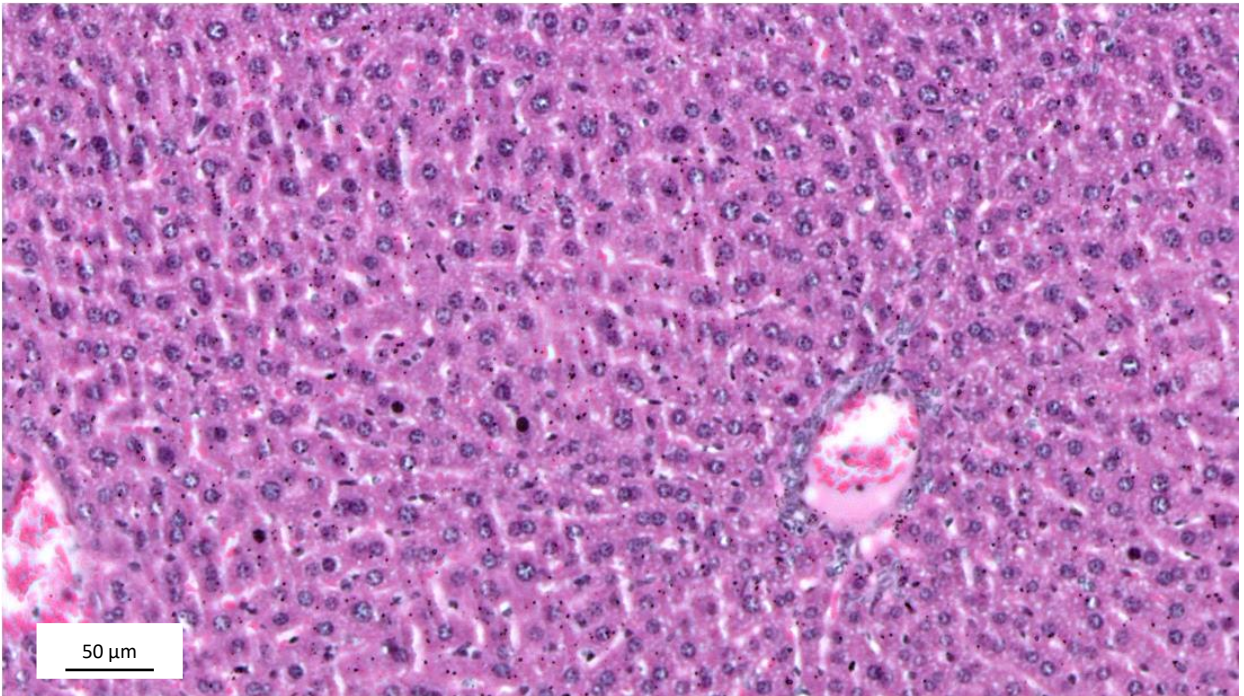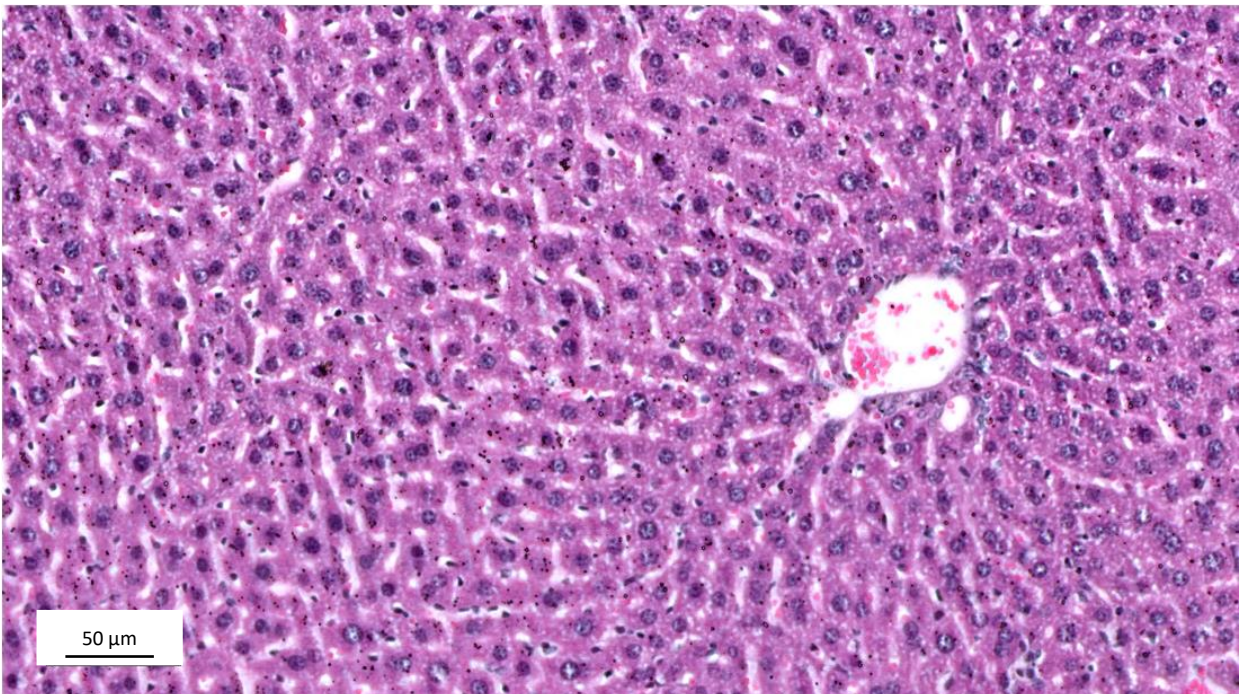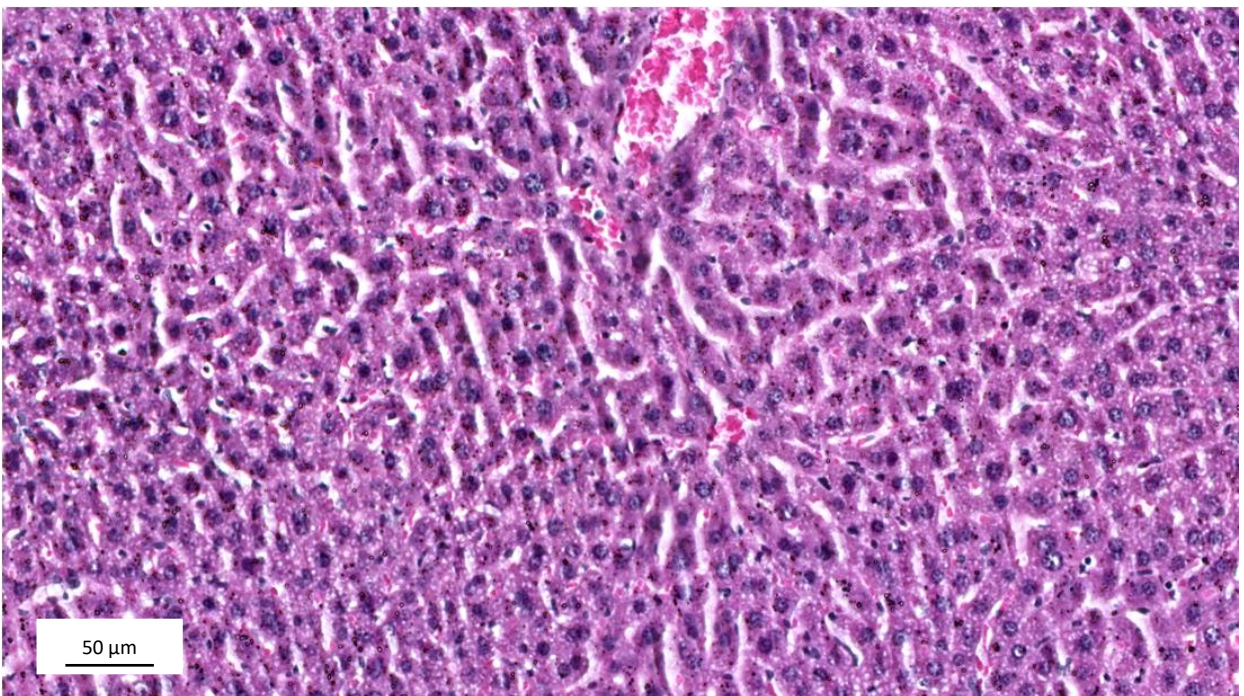

# NCD-2

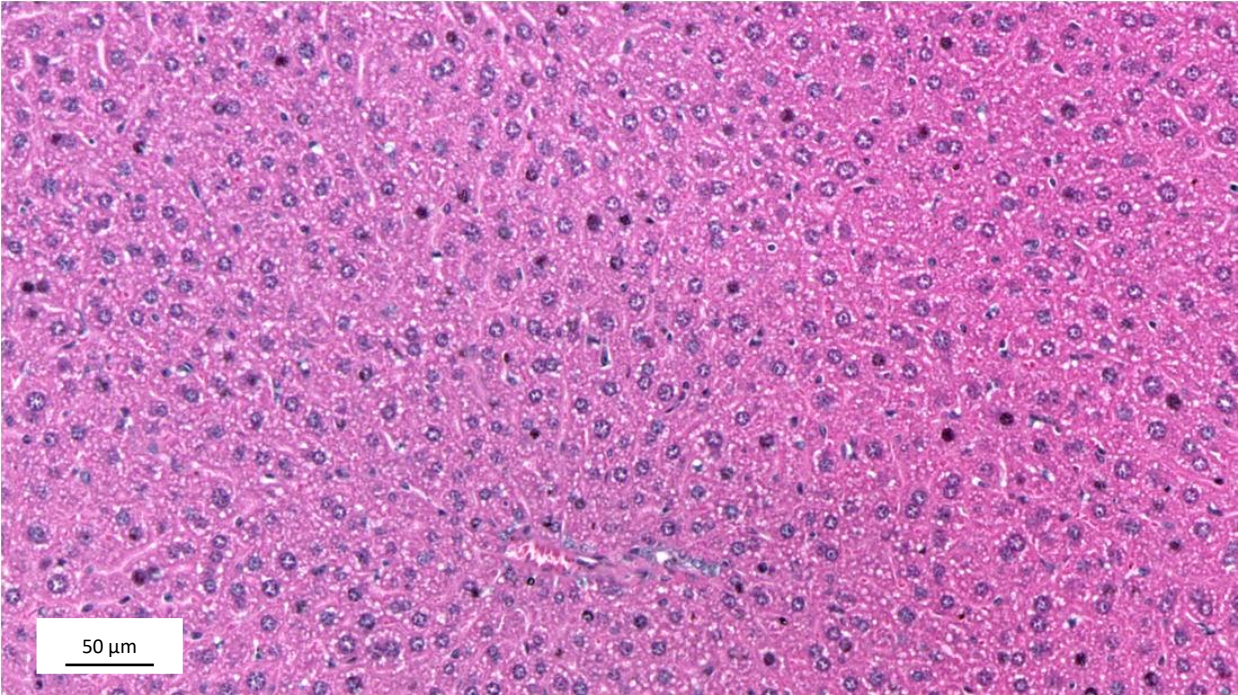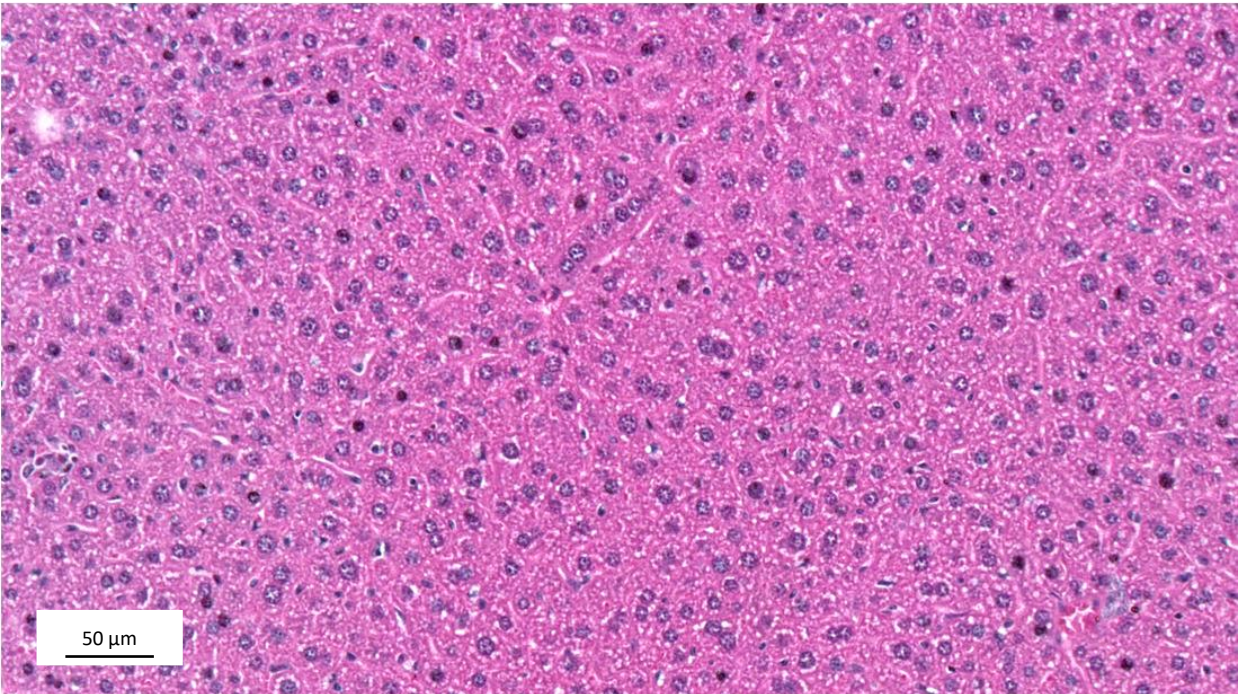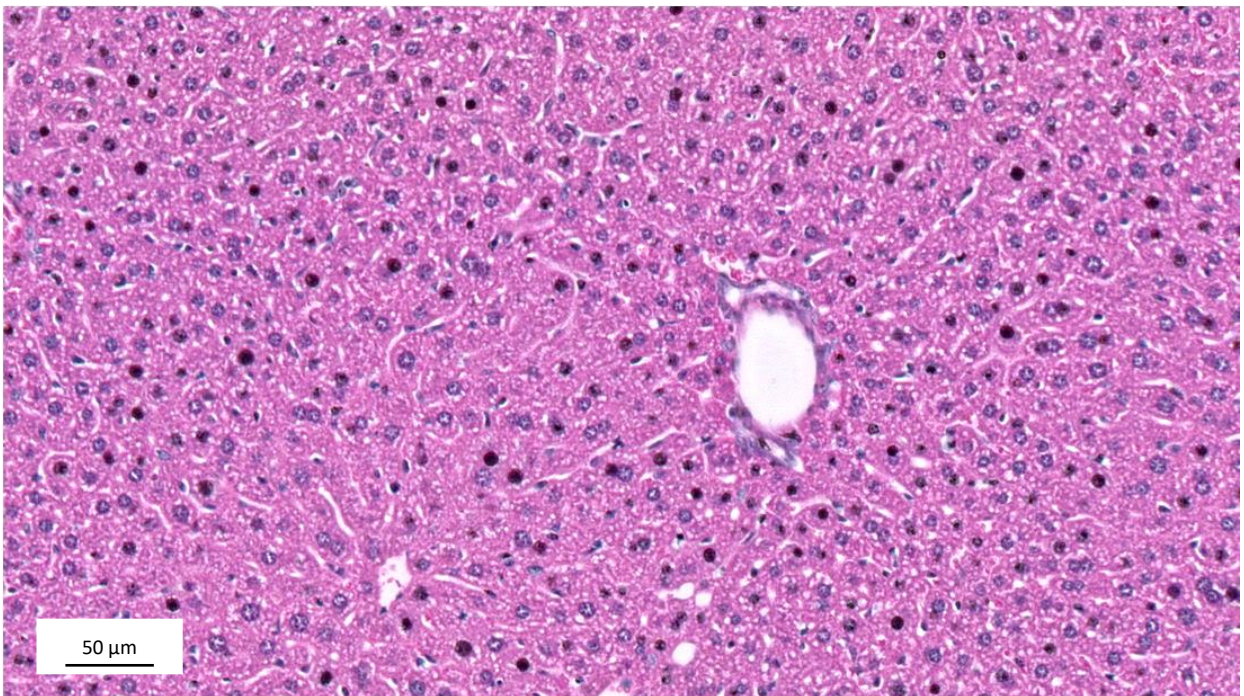

# NCD-3

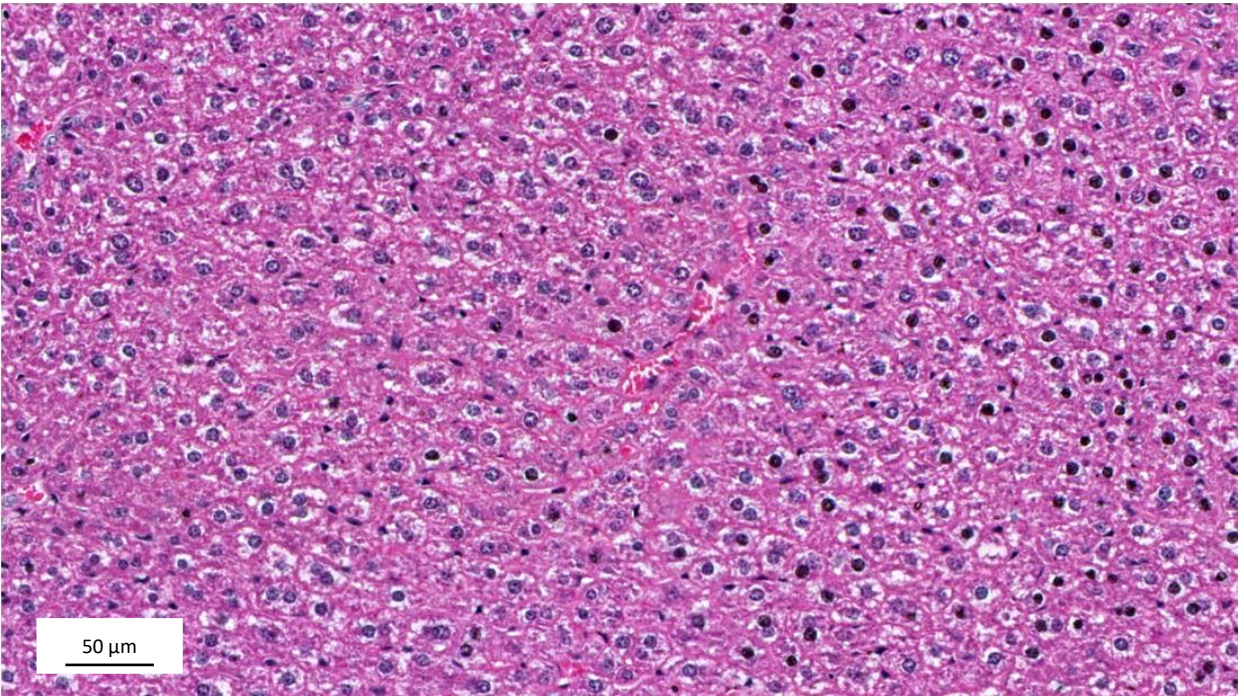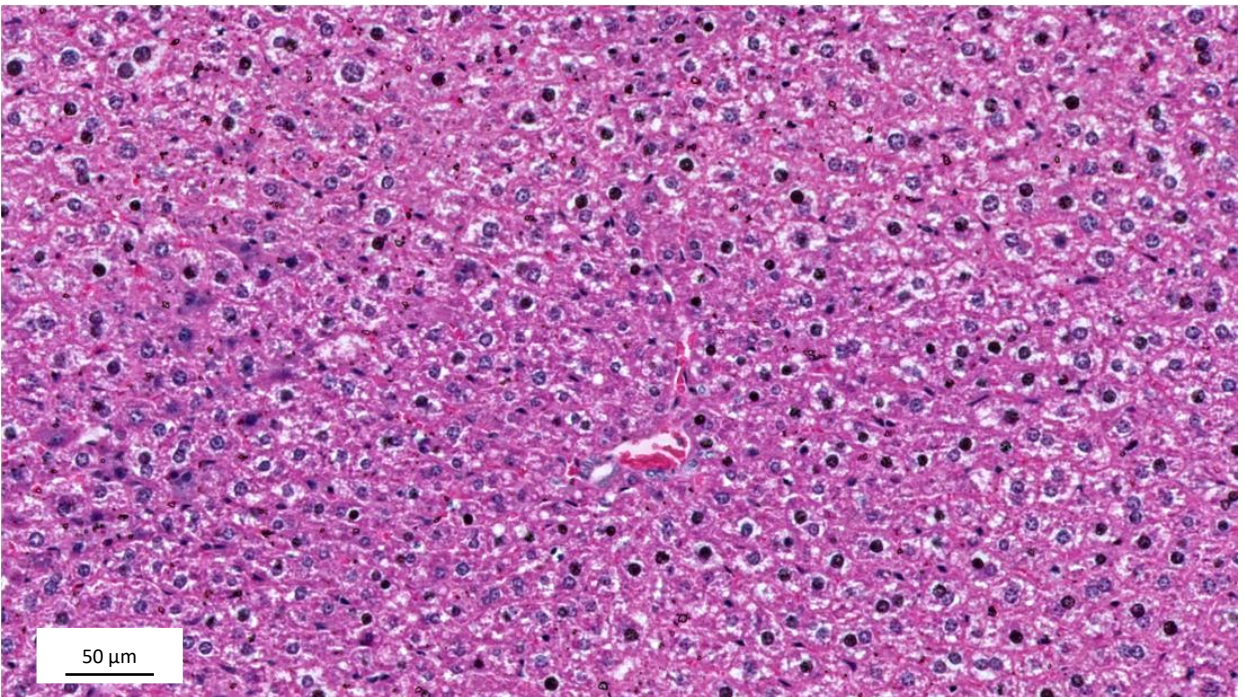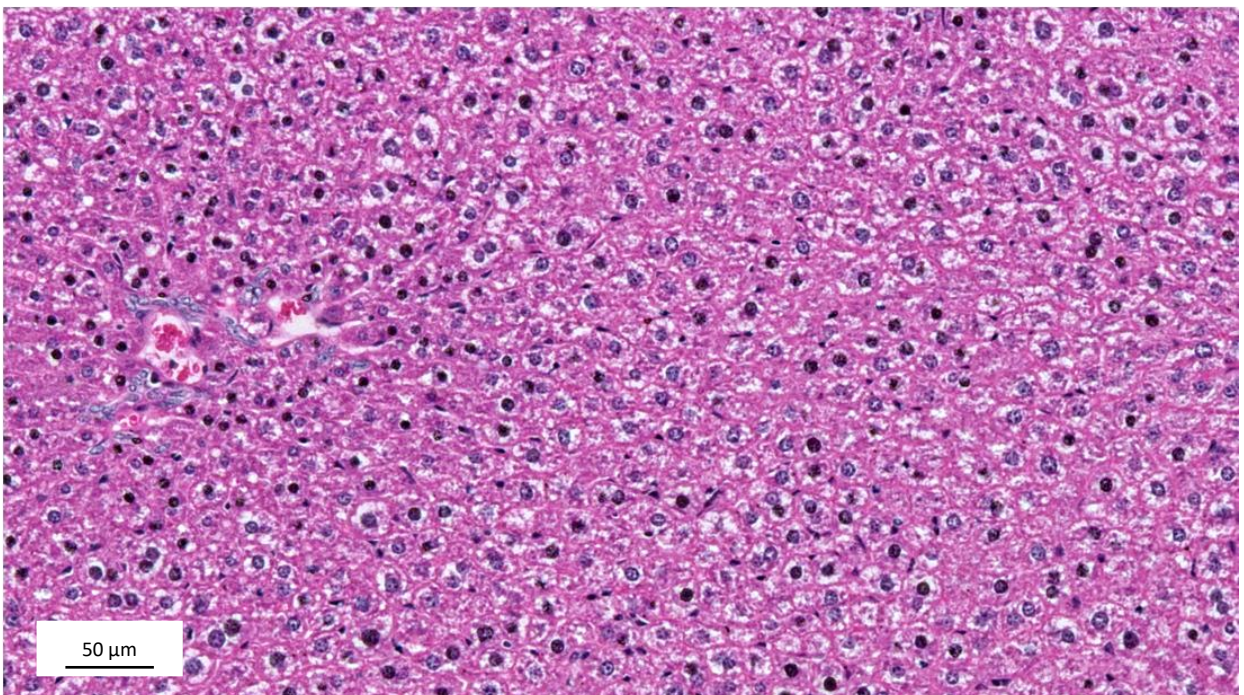

# NCD-4

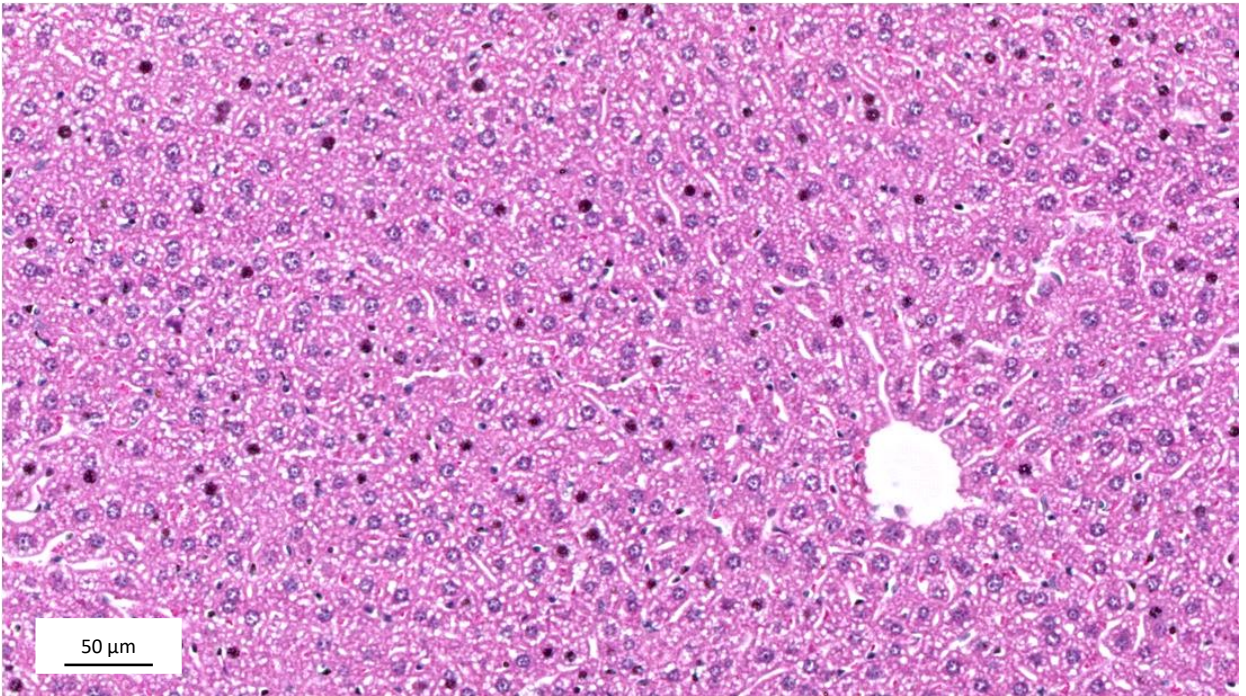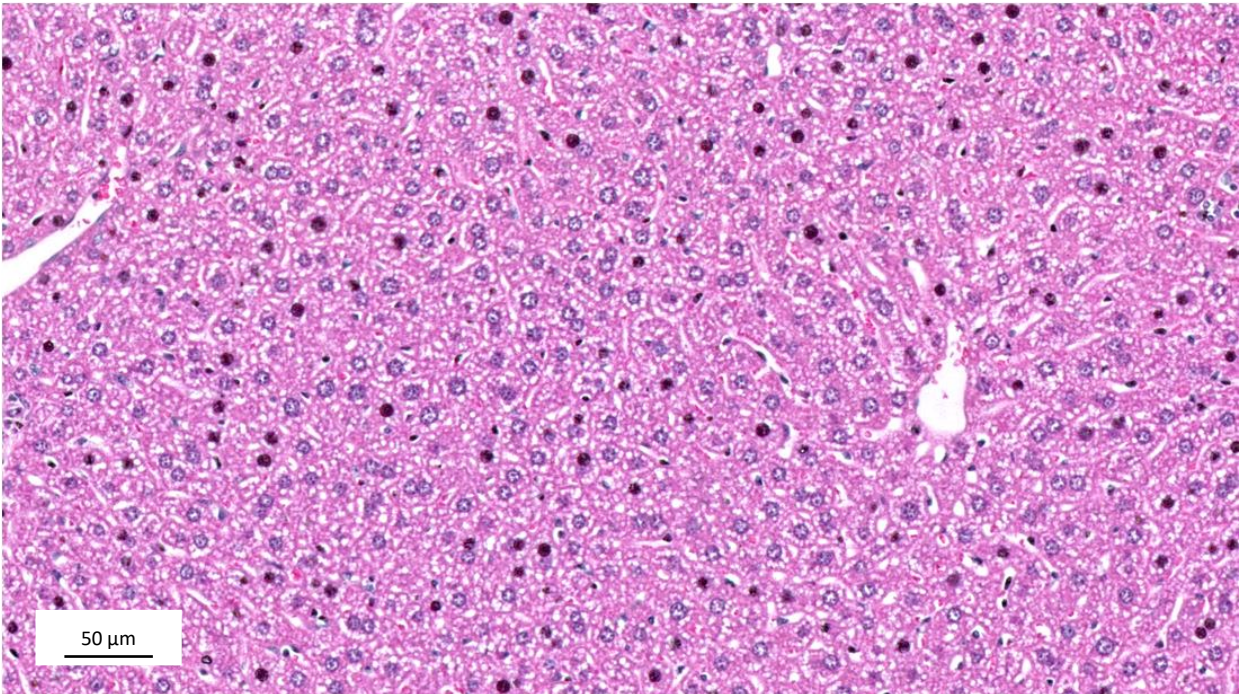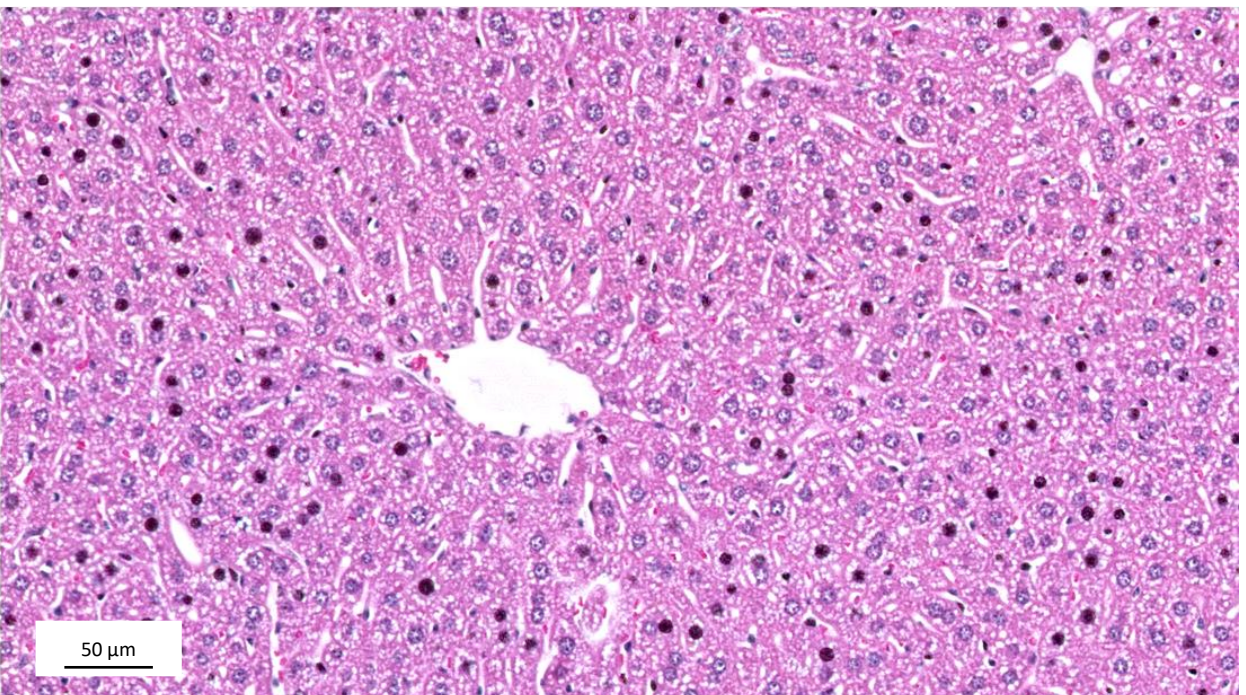

# NCD-5

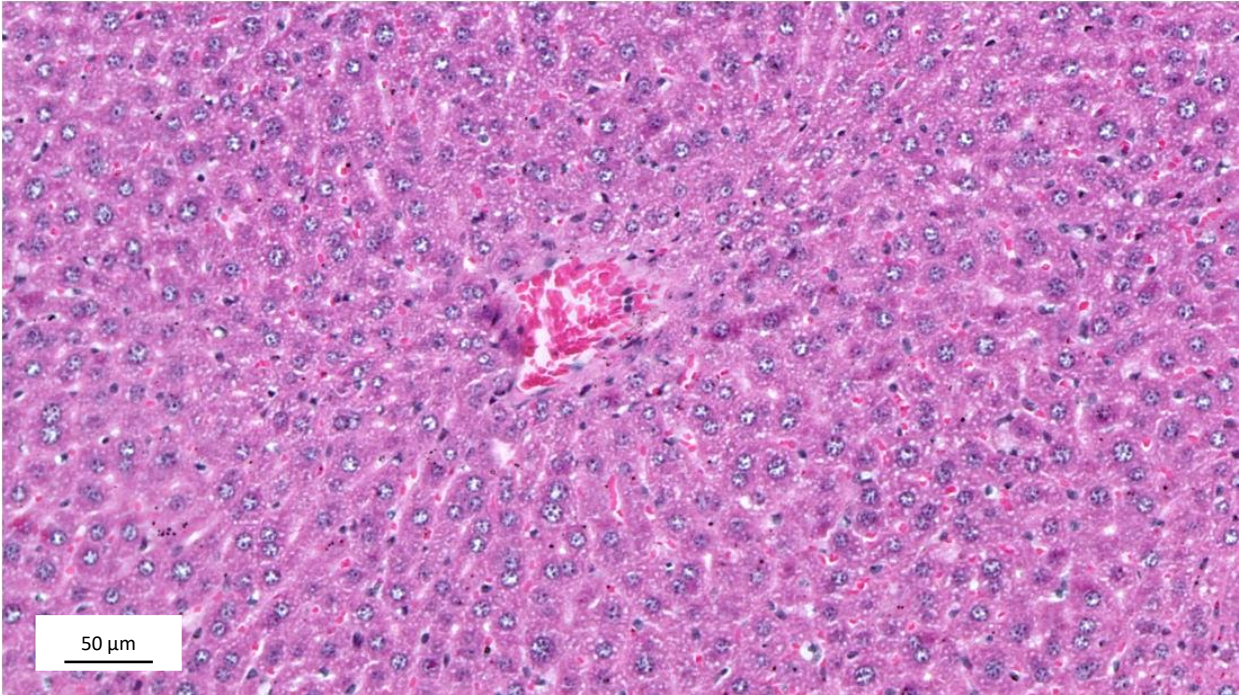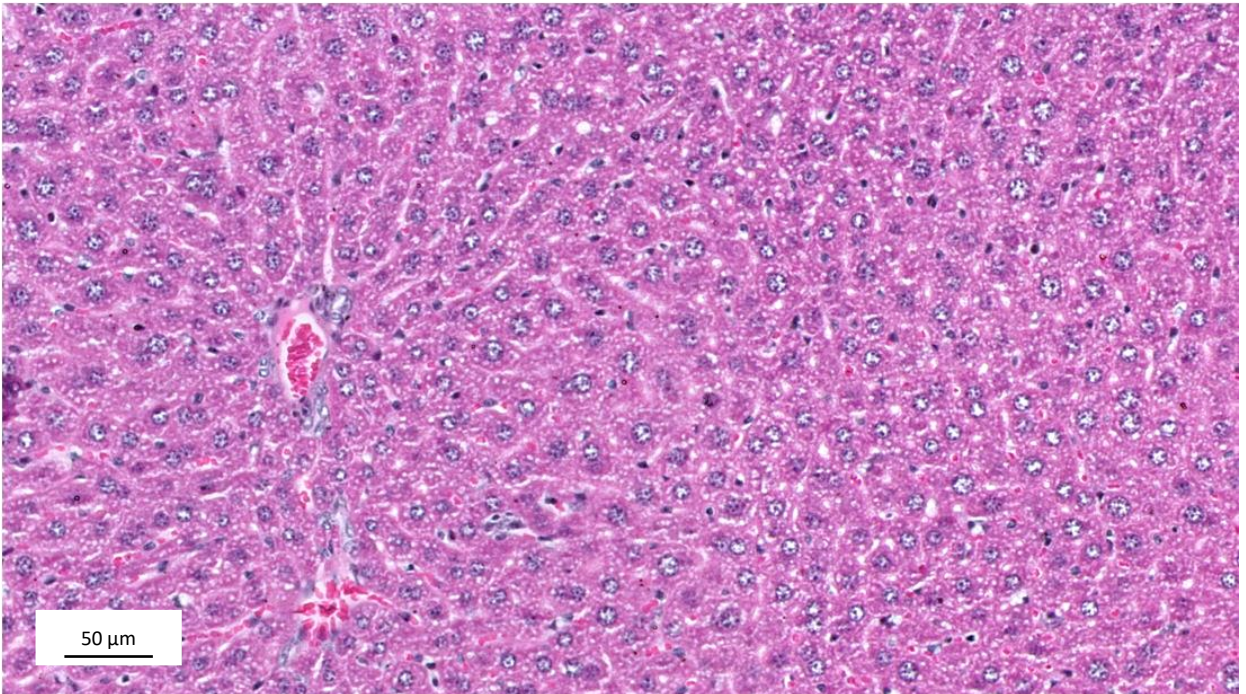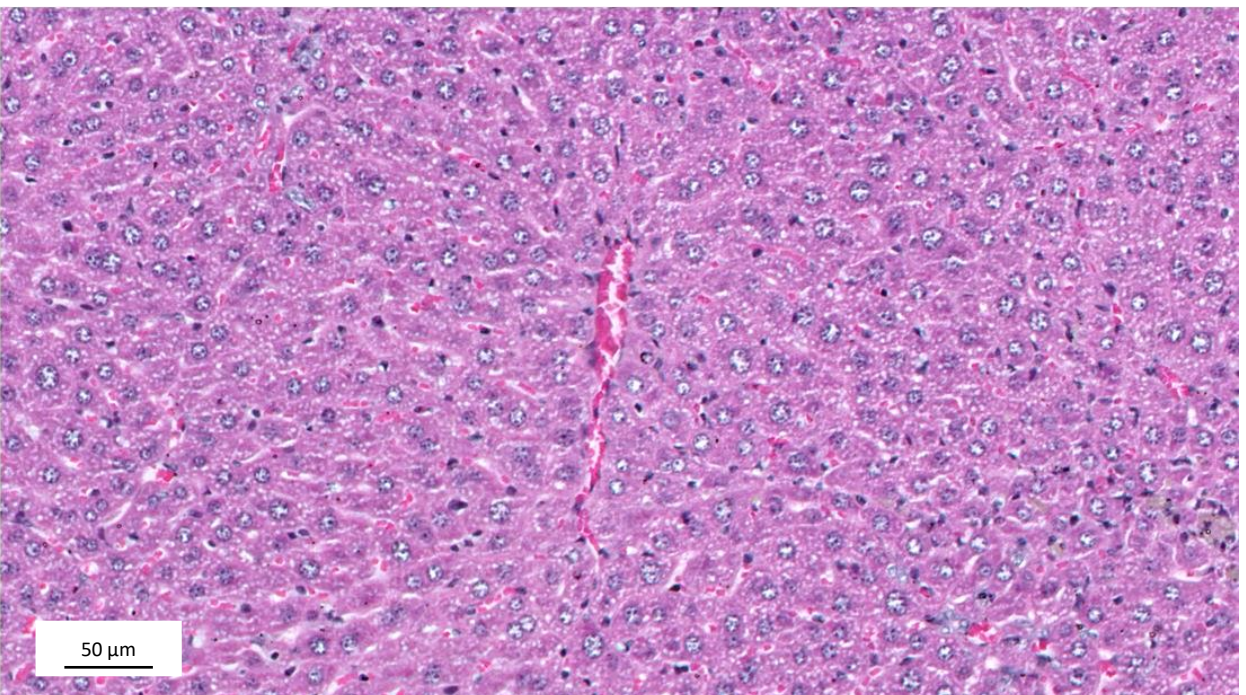

# NCD-6

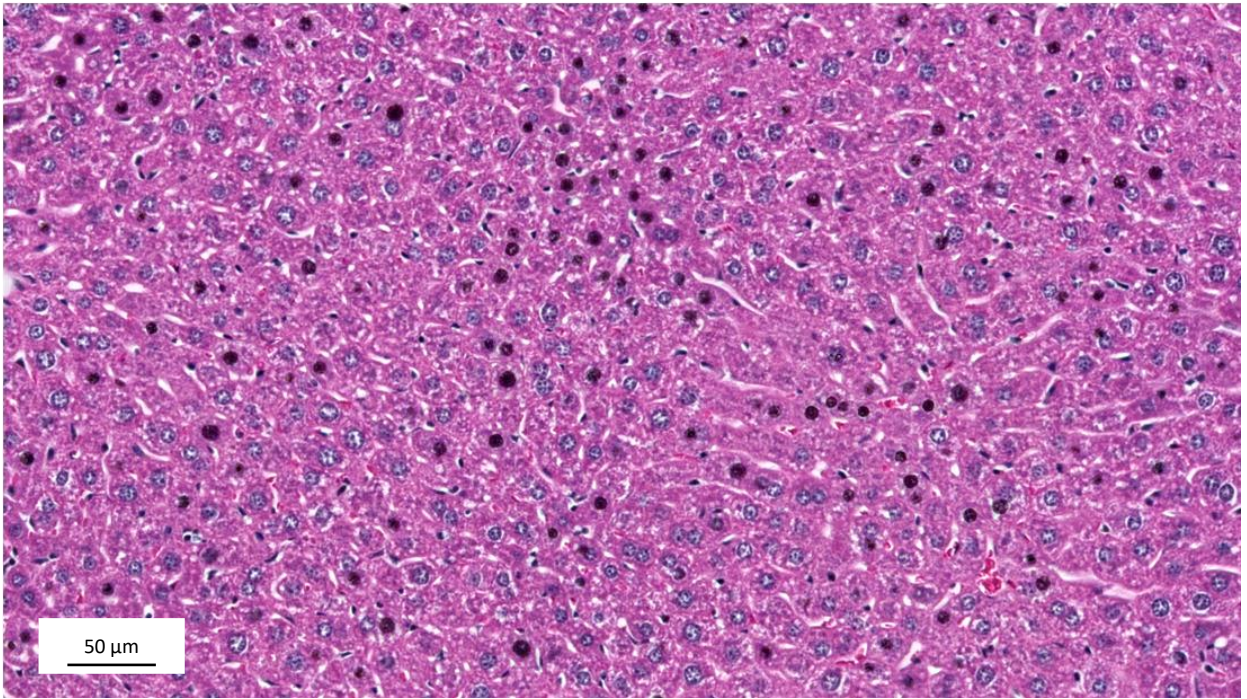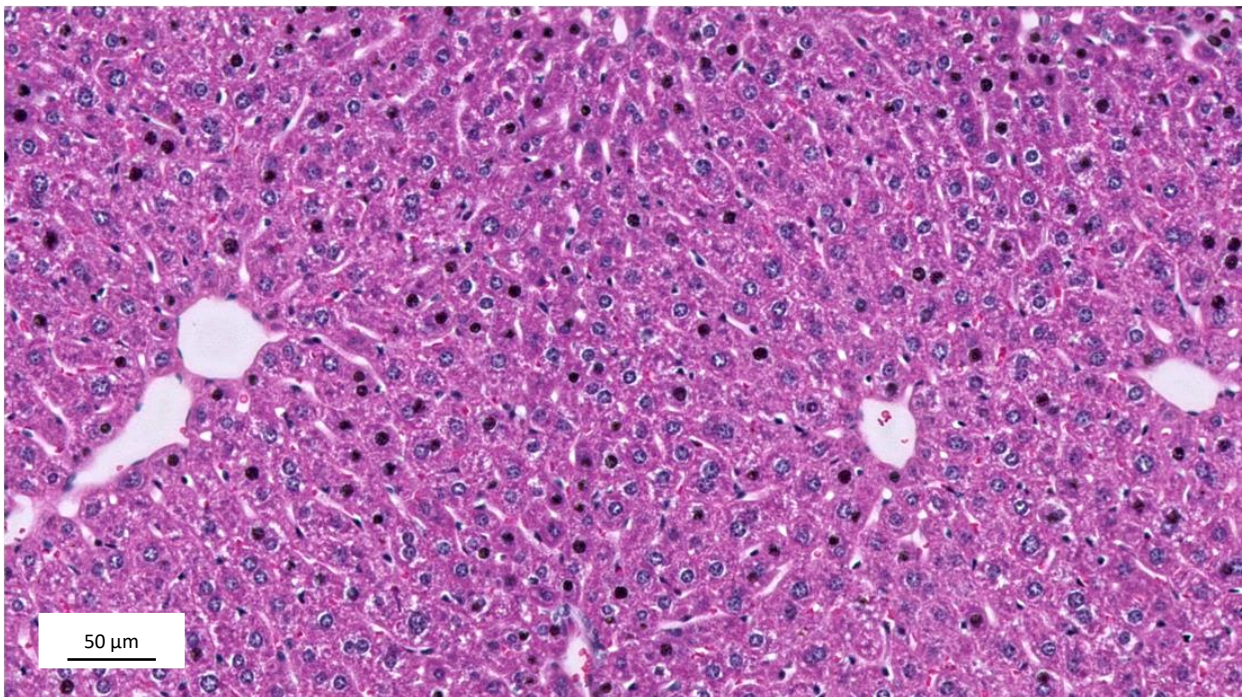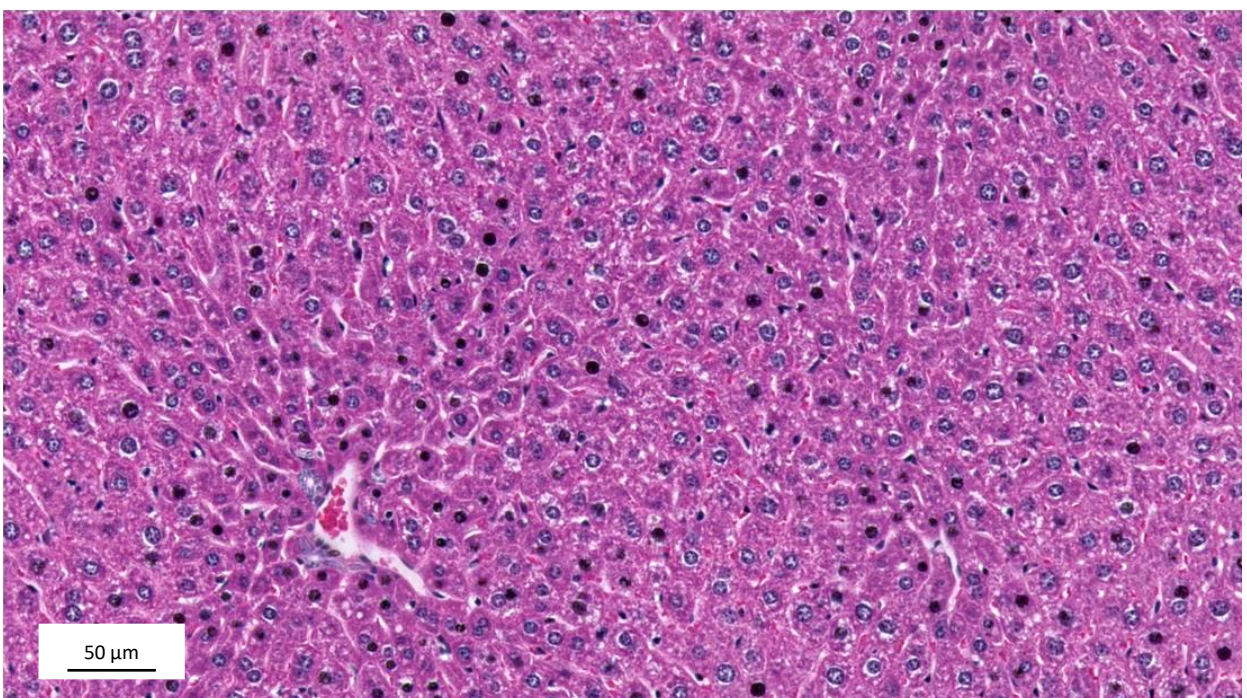



# NCD-7

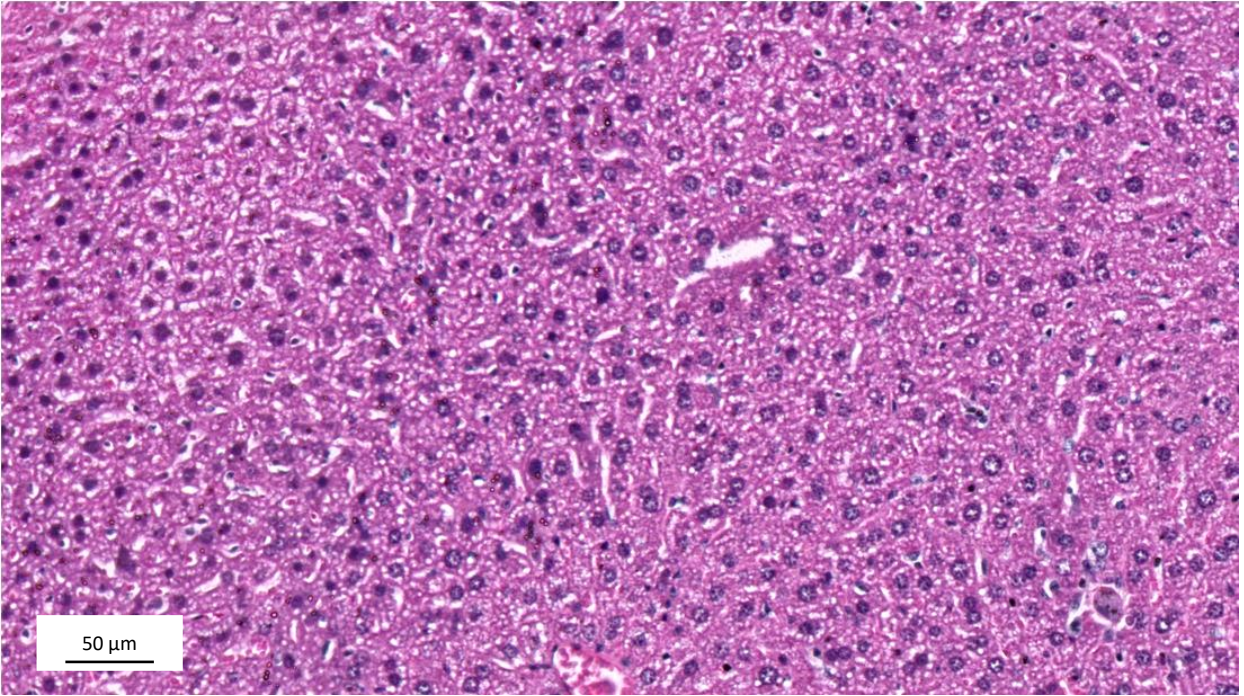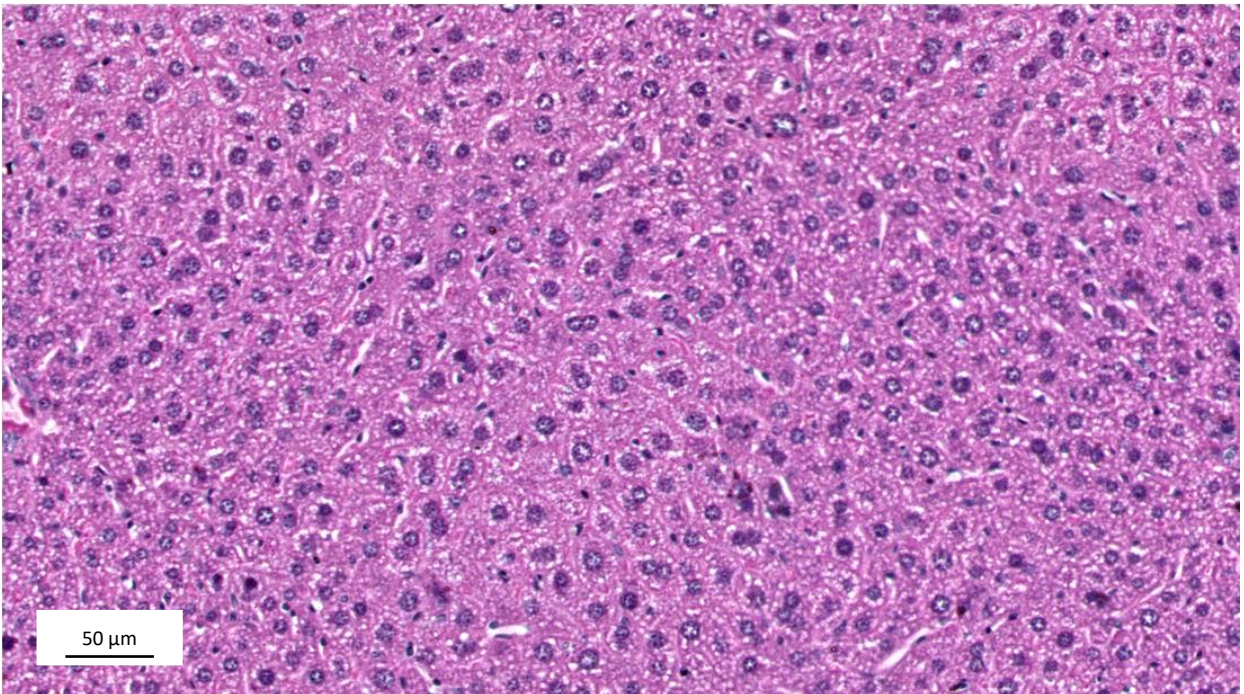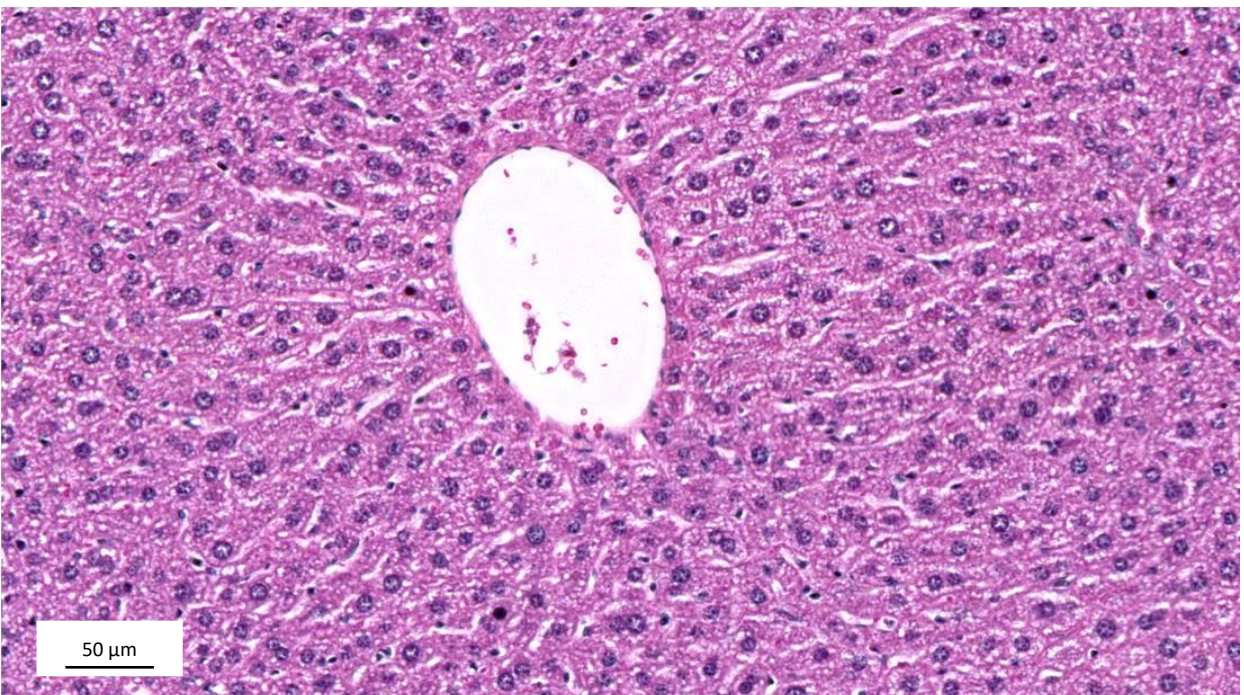

# NCD-8

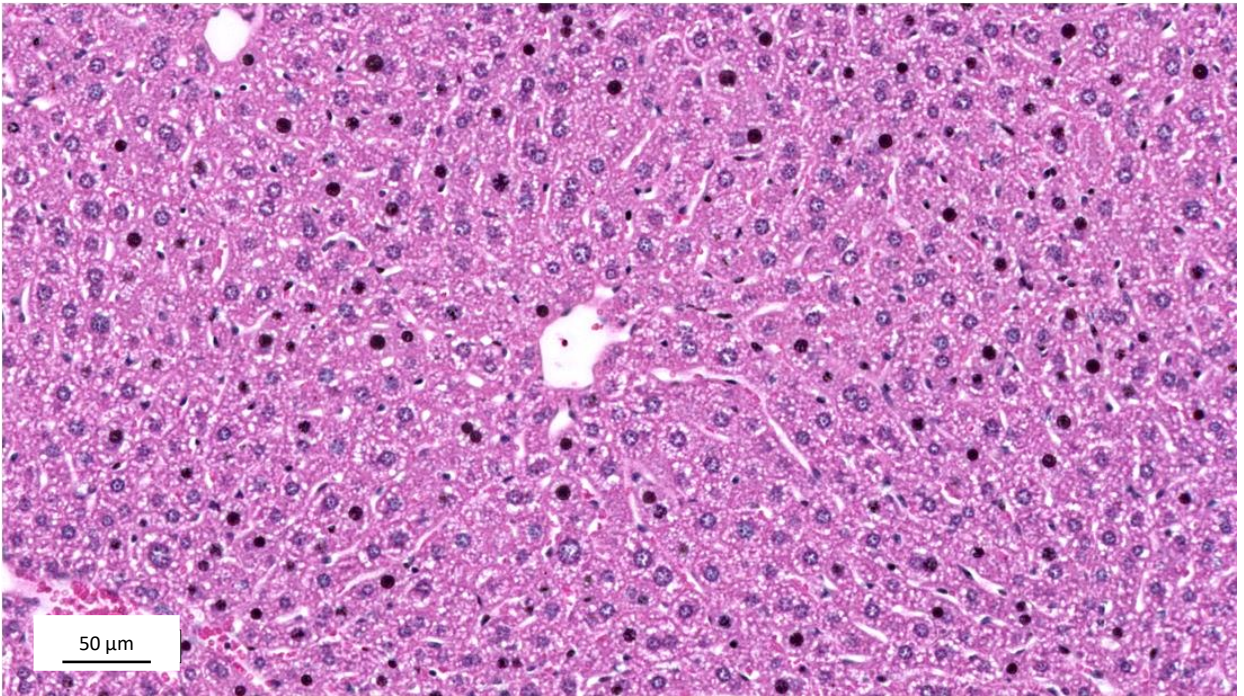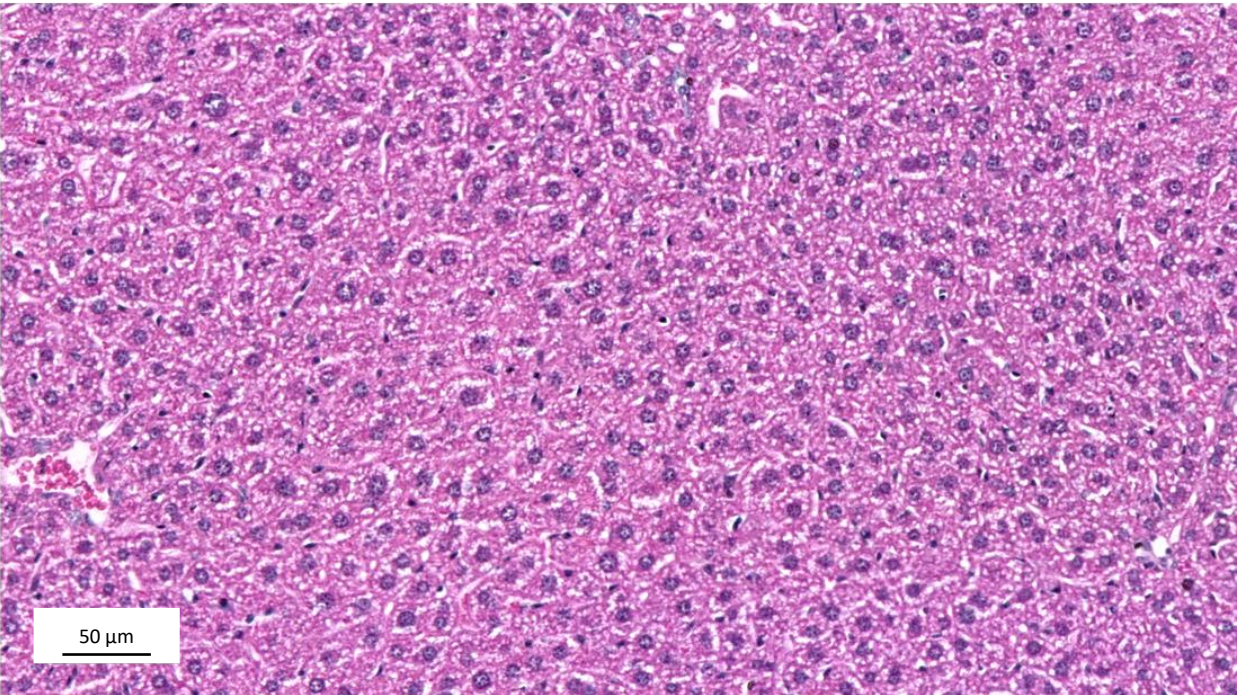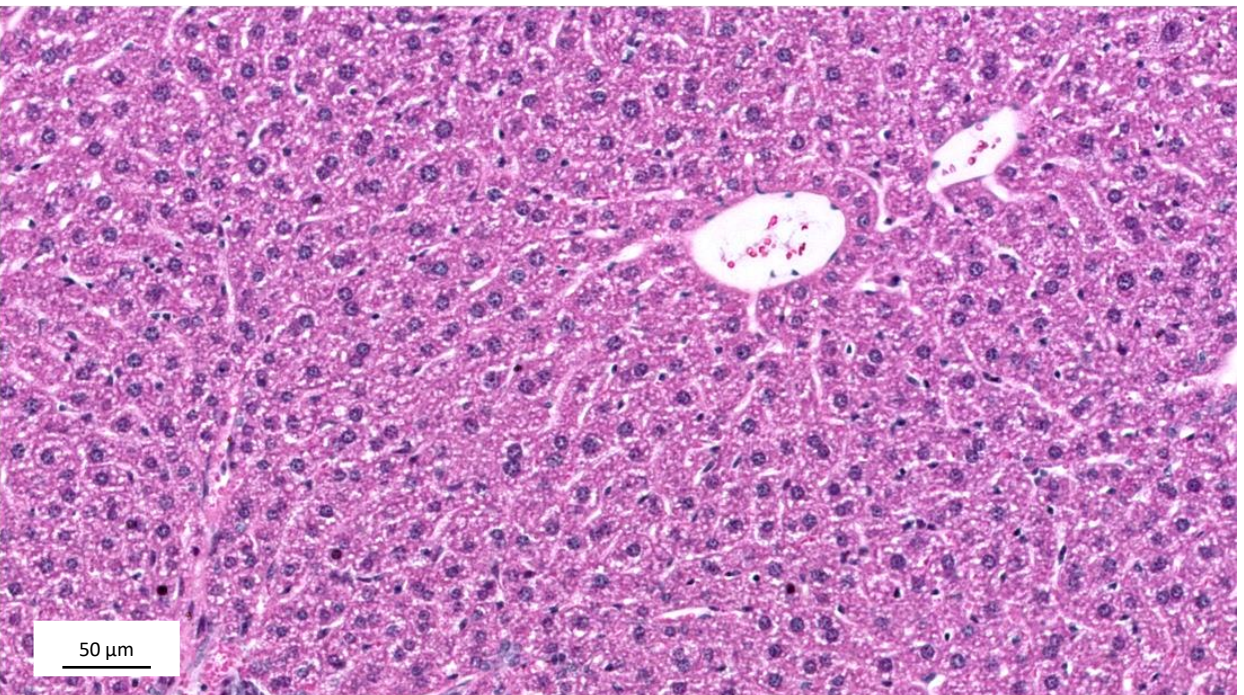

# NCD-9

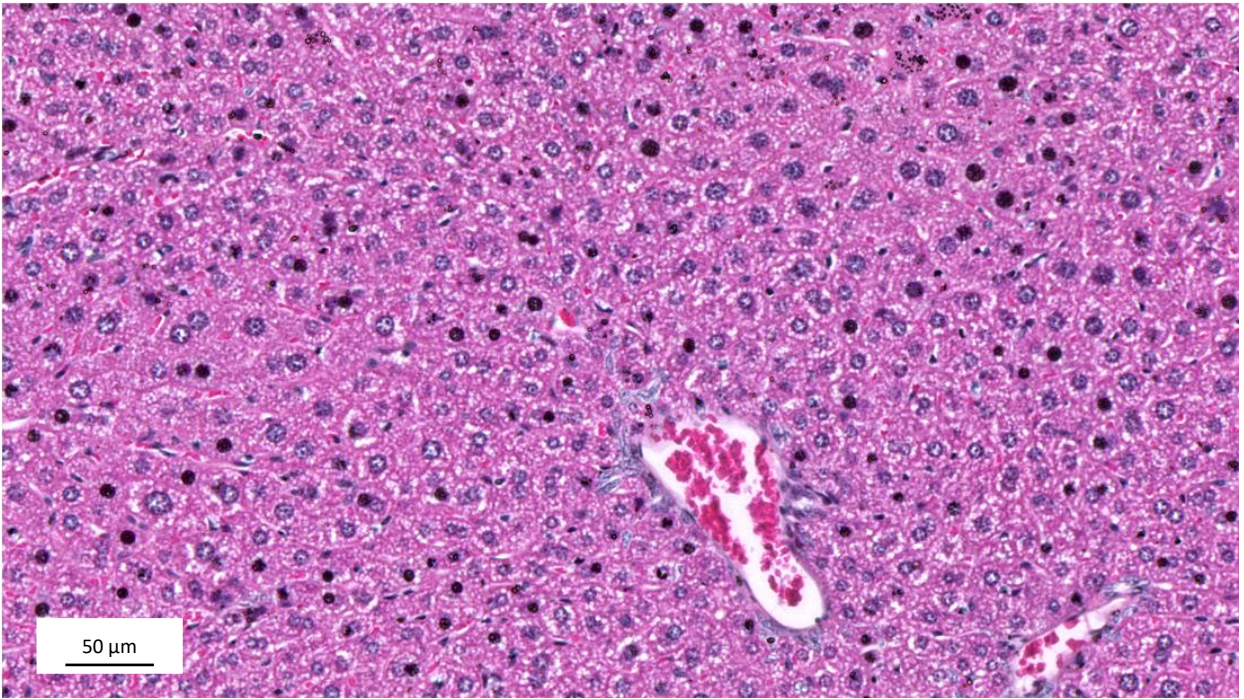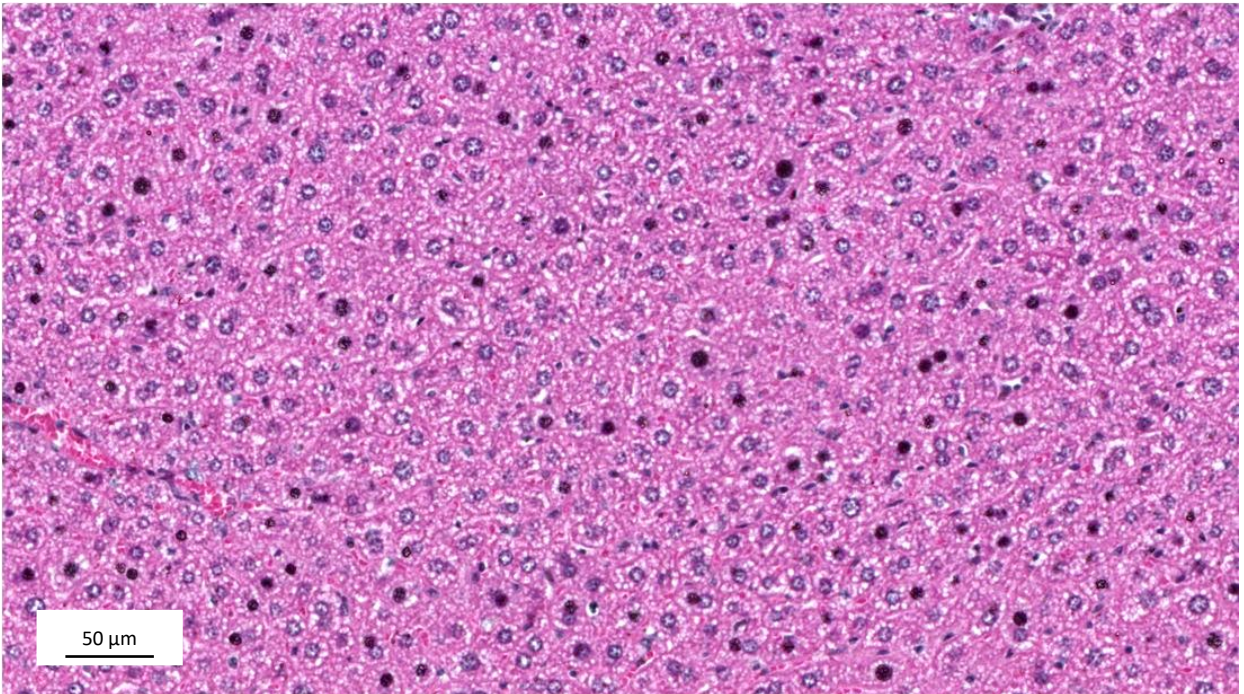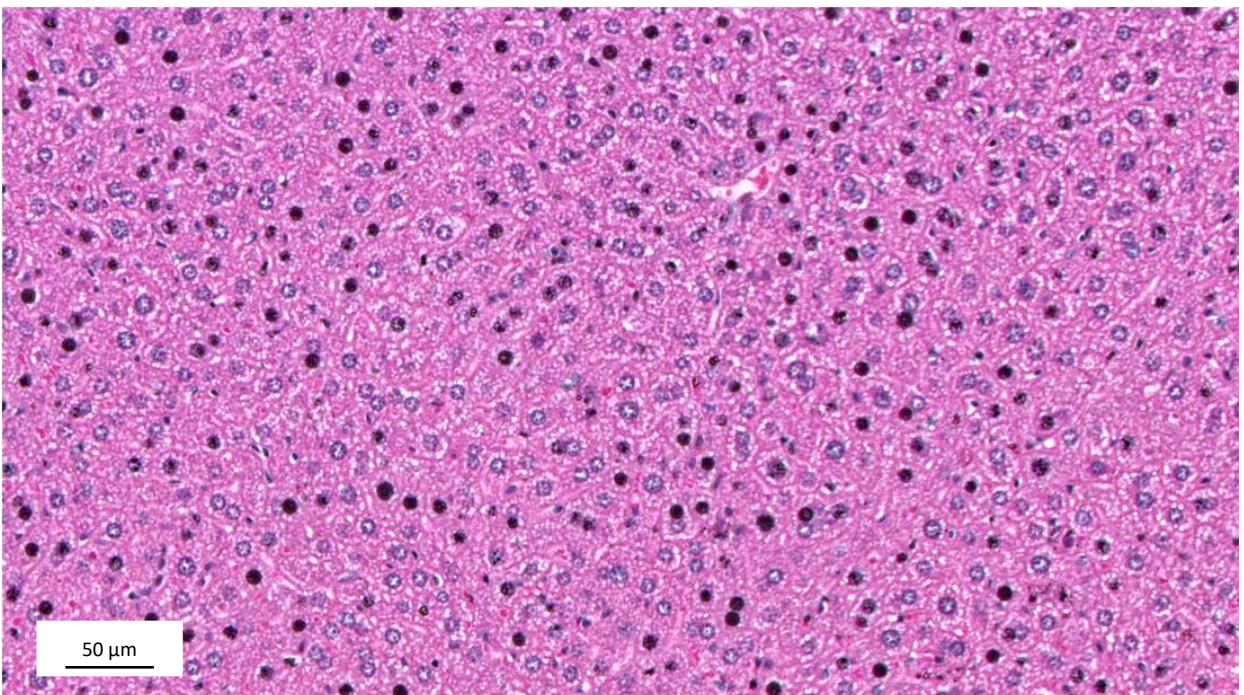

# NCD-10

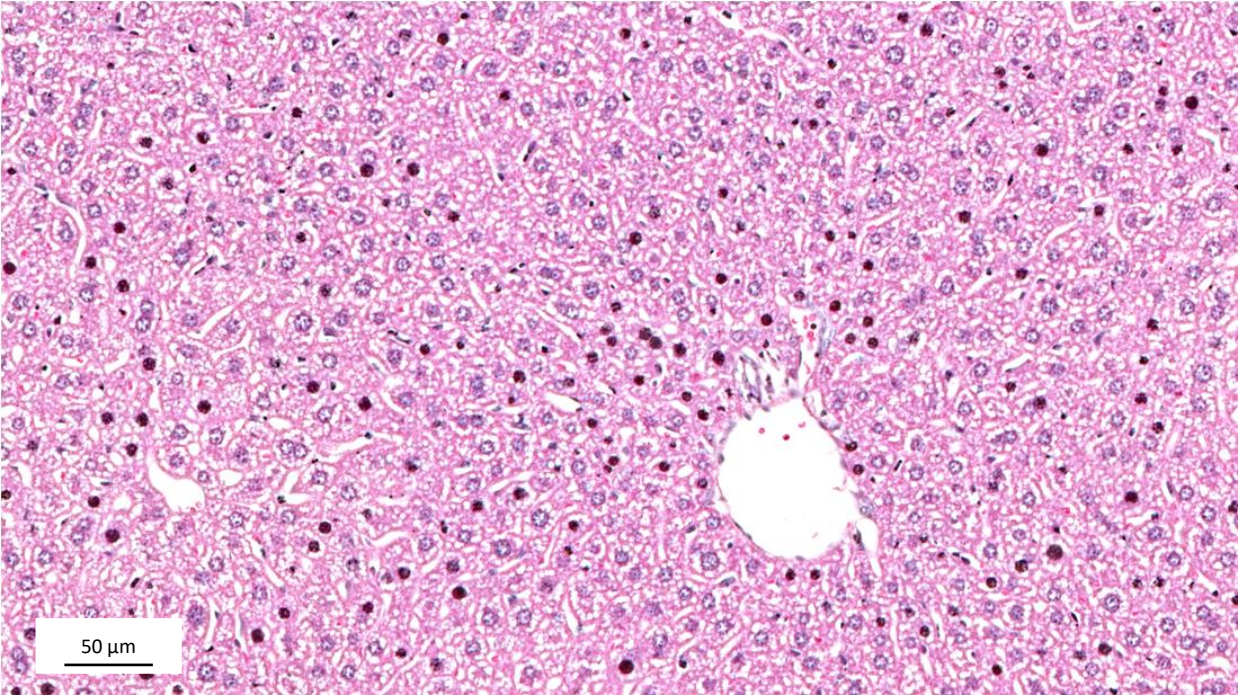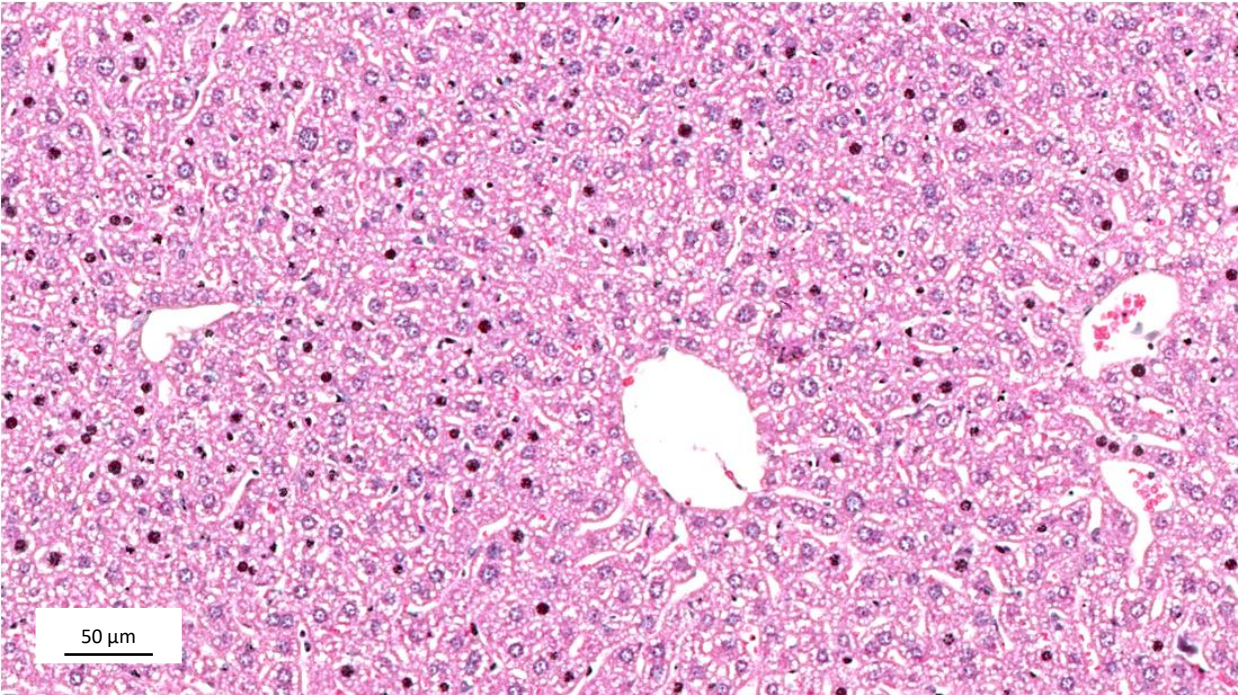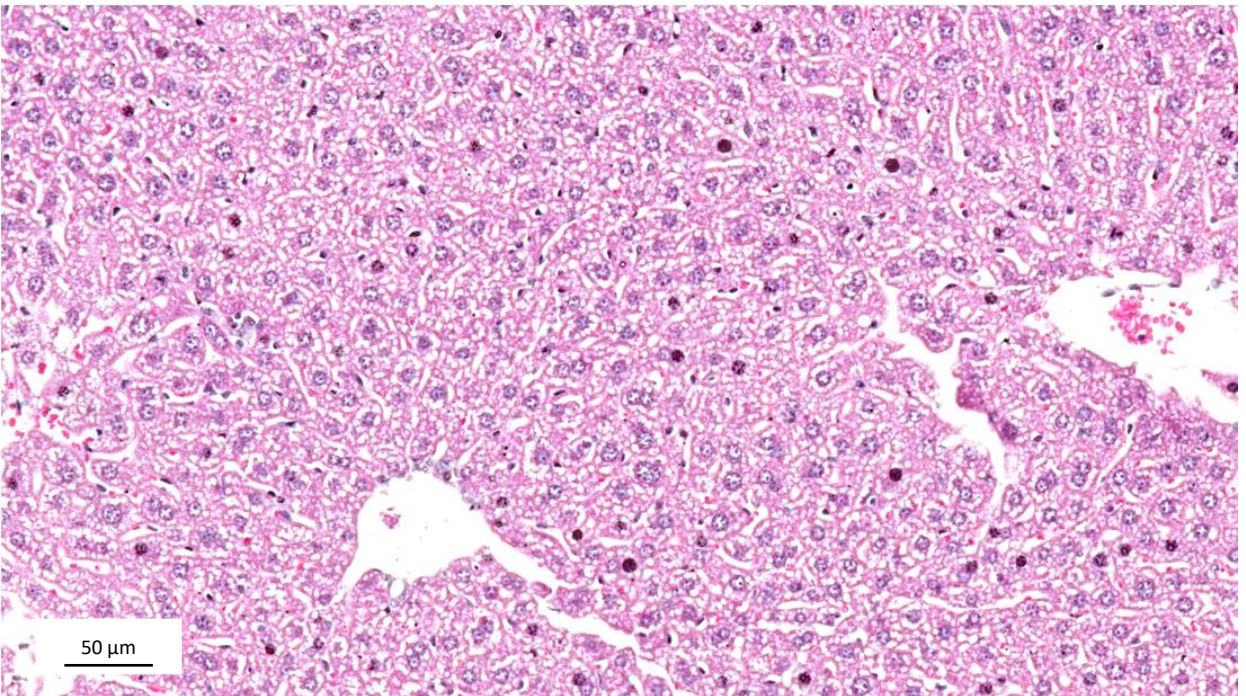

**H&E Staining**

**CDHFD group**

(13 mice were included)

# CDHFD-1

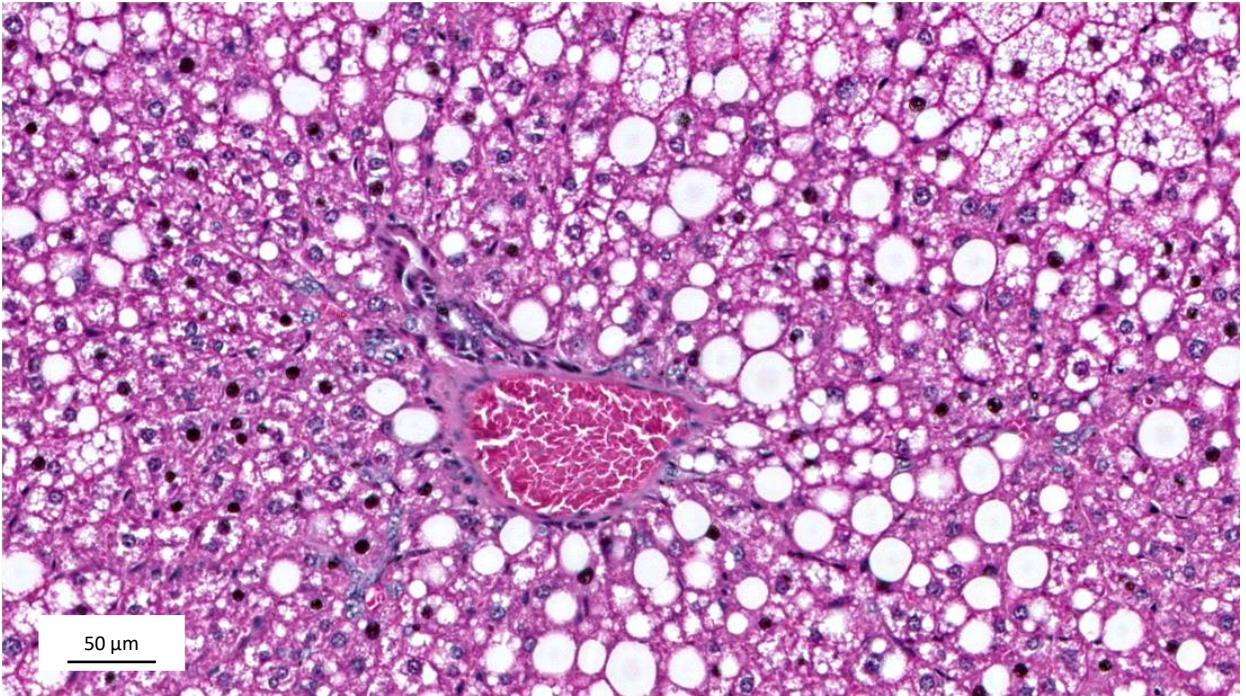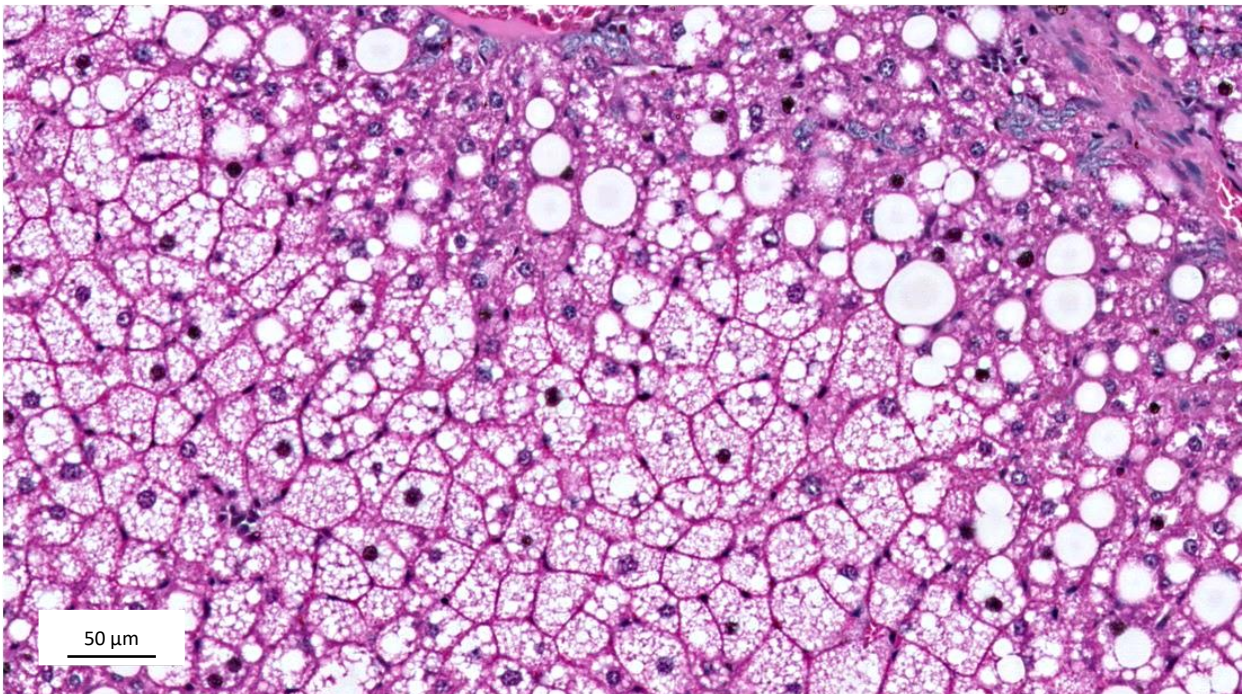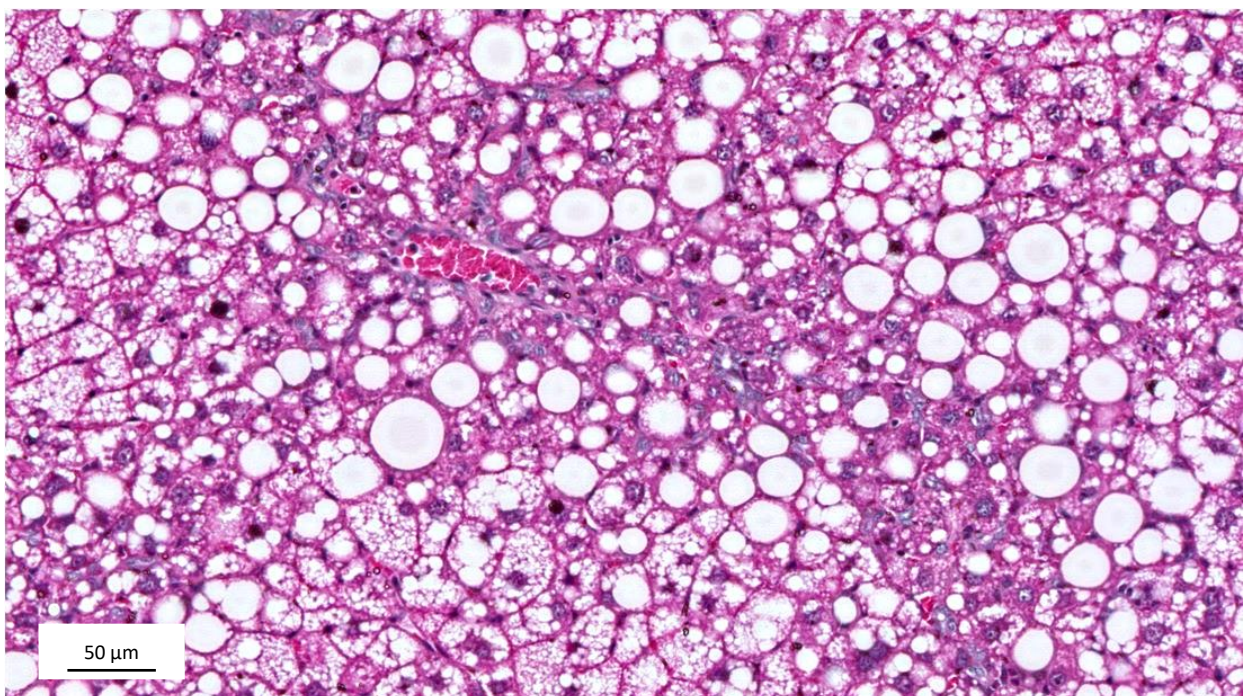

# CDHFD-2

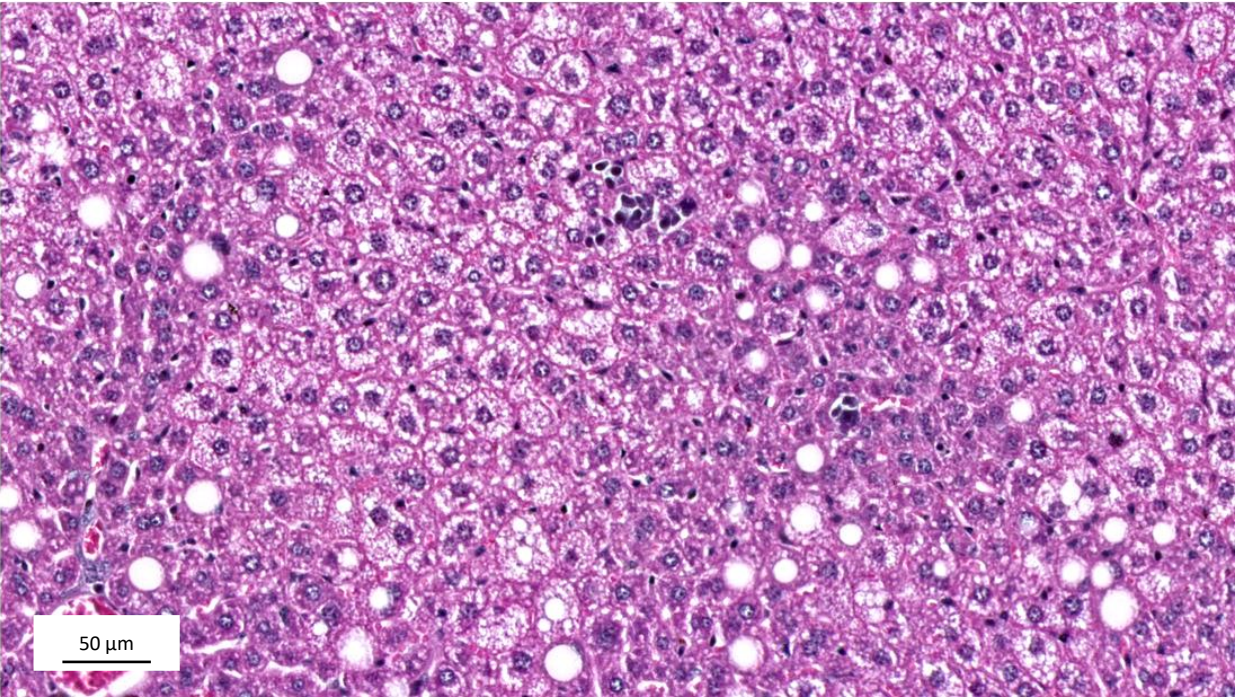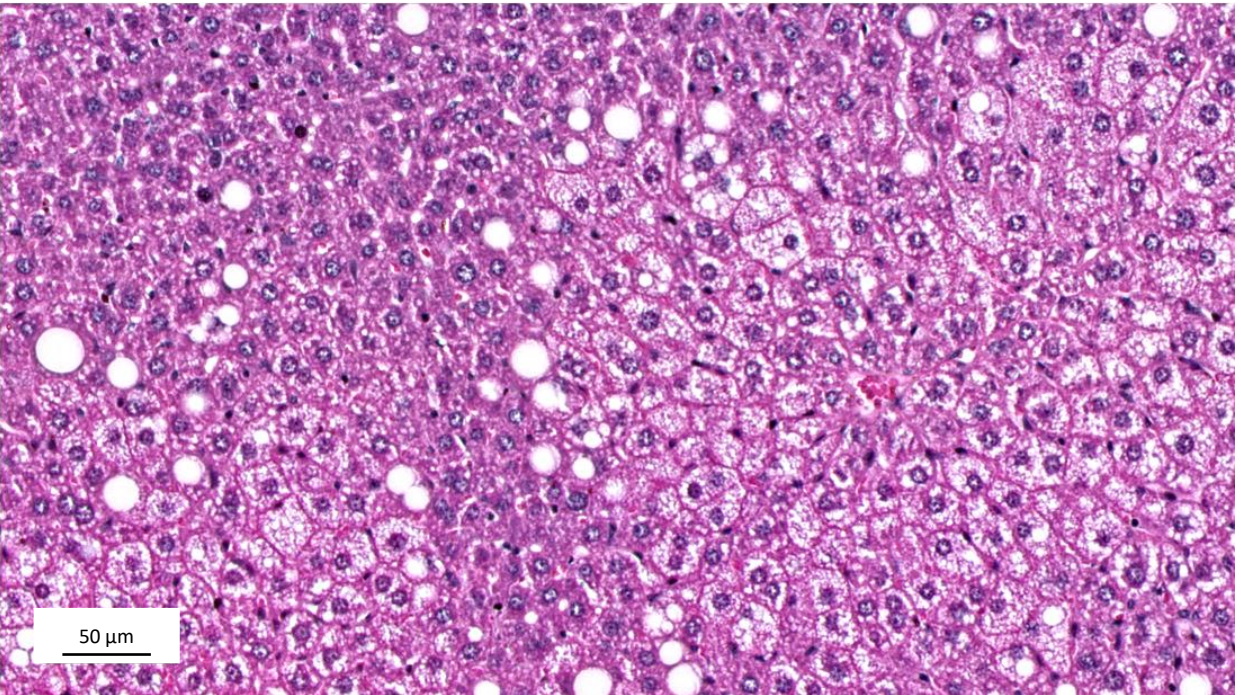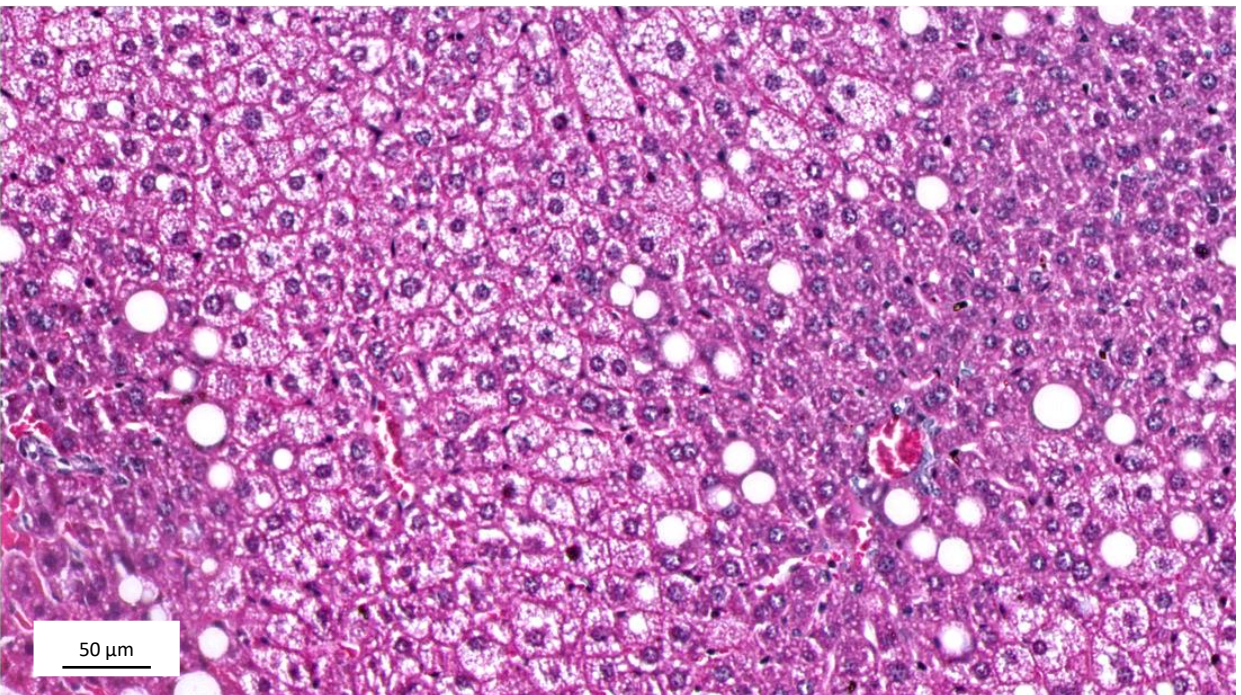

CDHFD-3

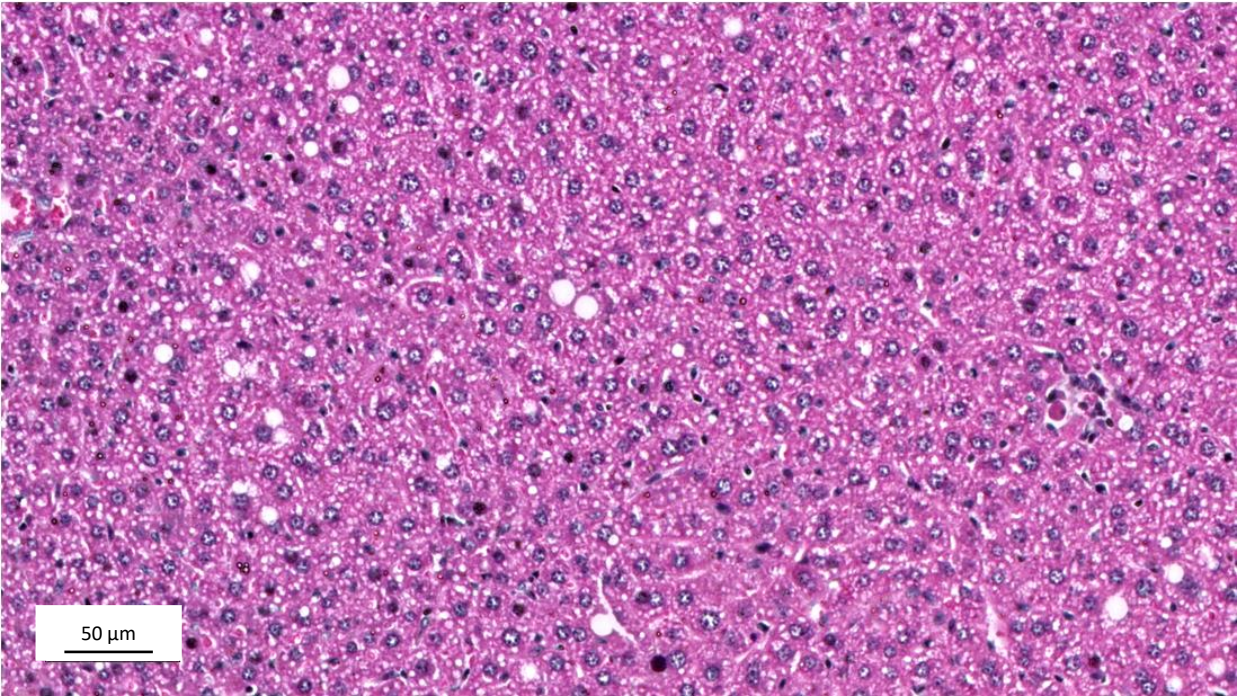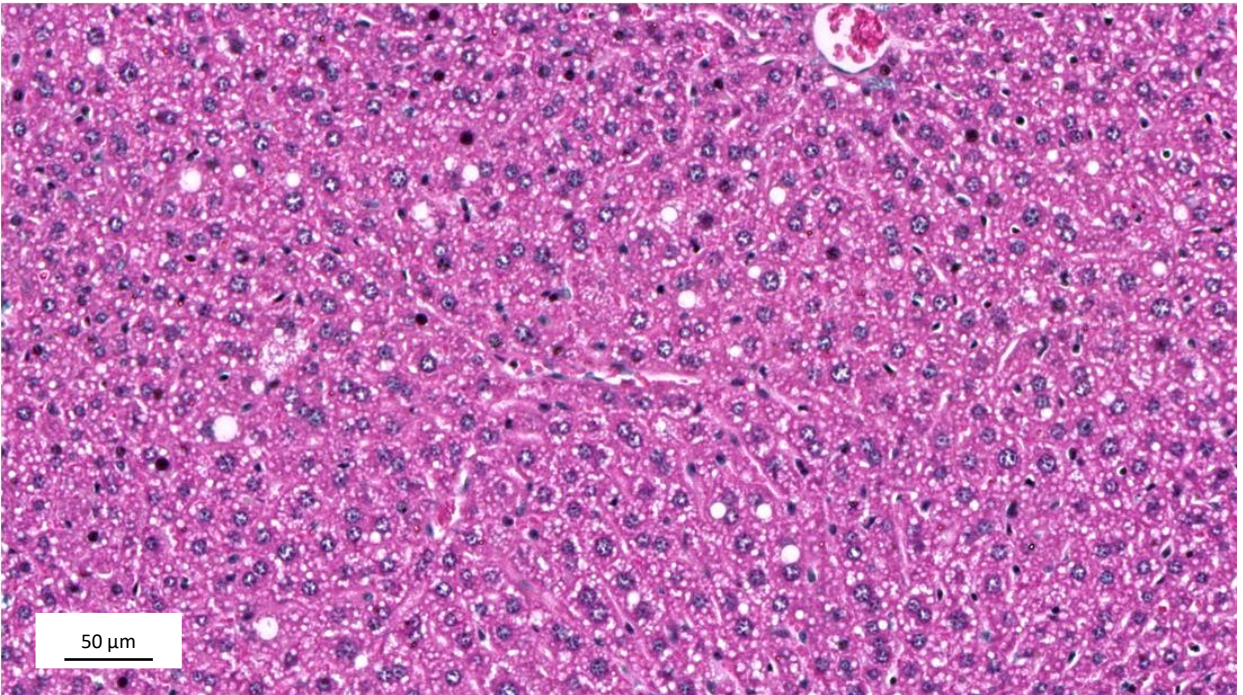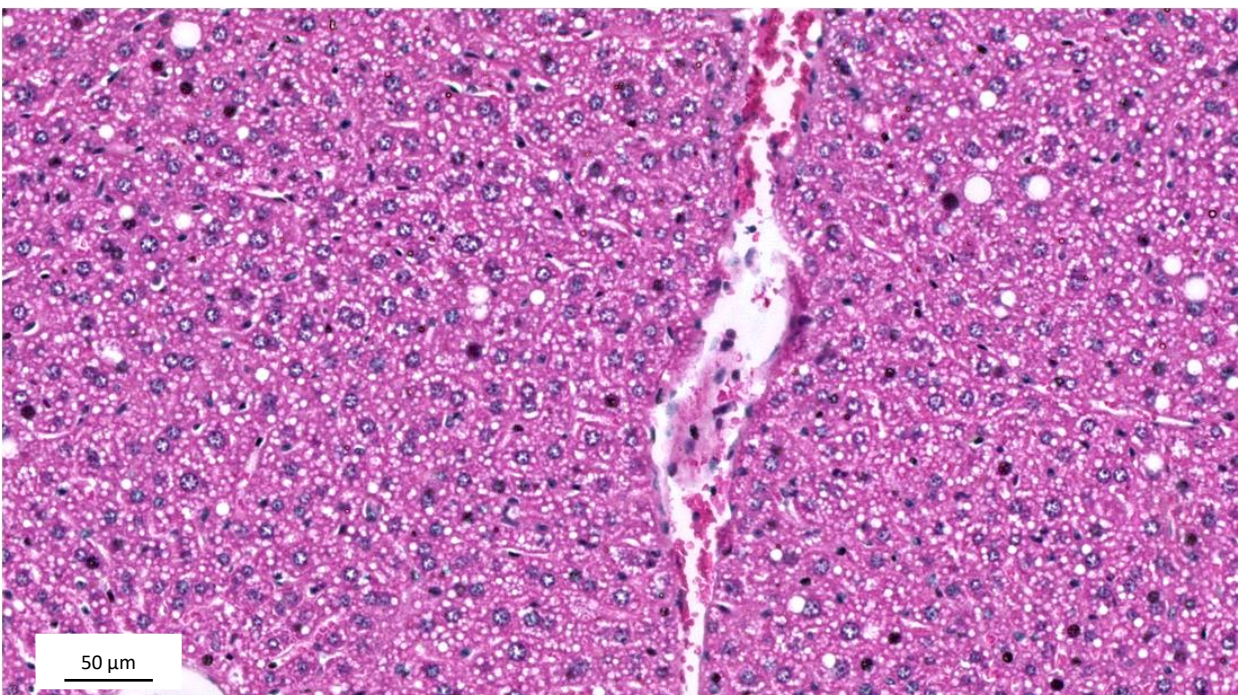



# CDHFD-4

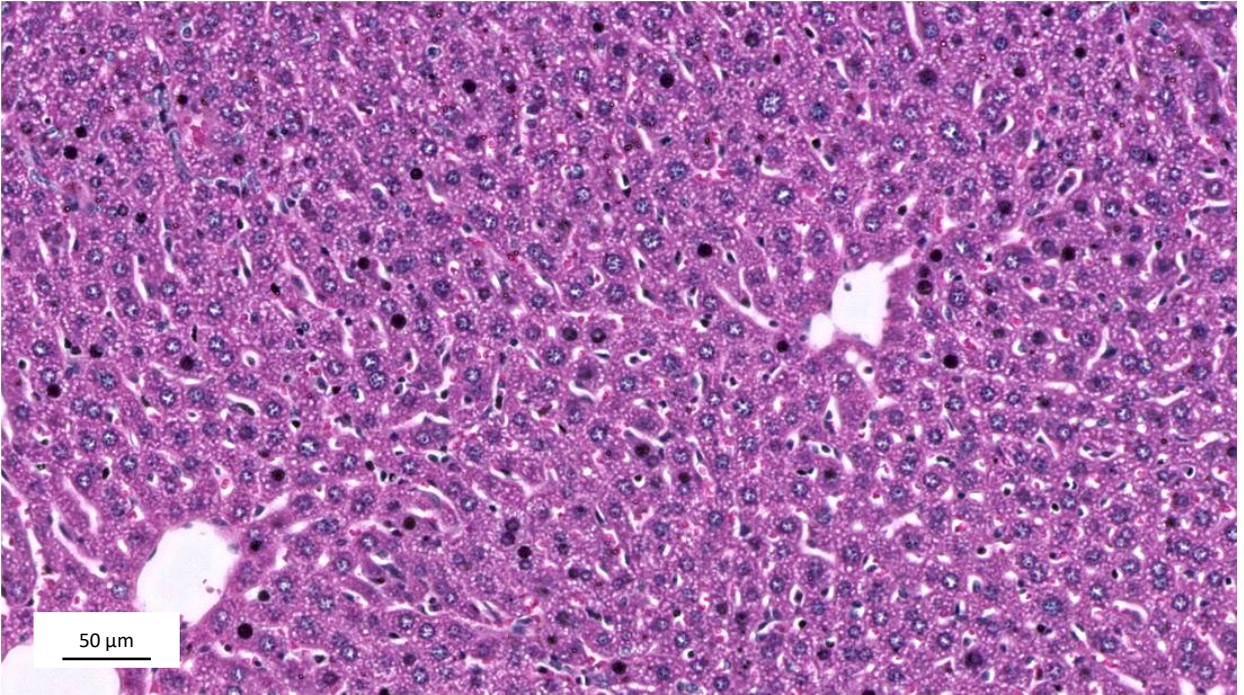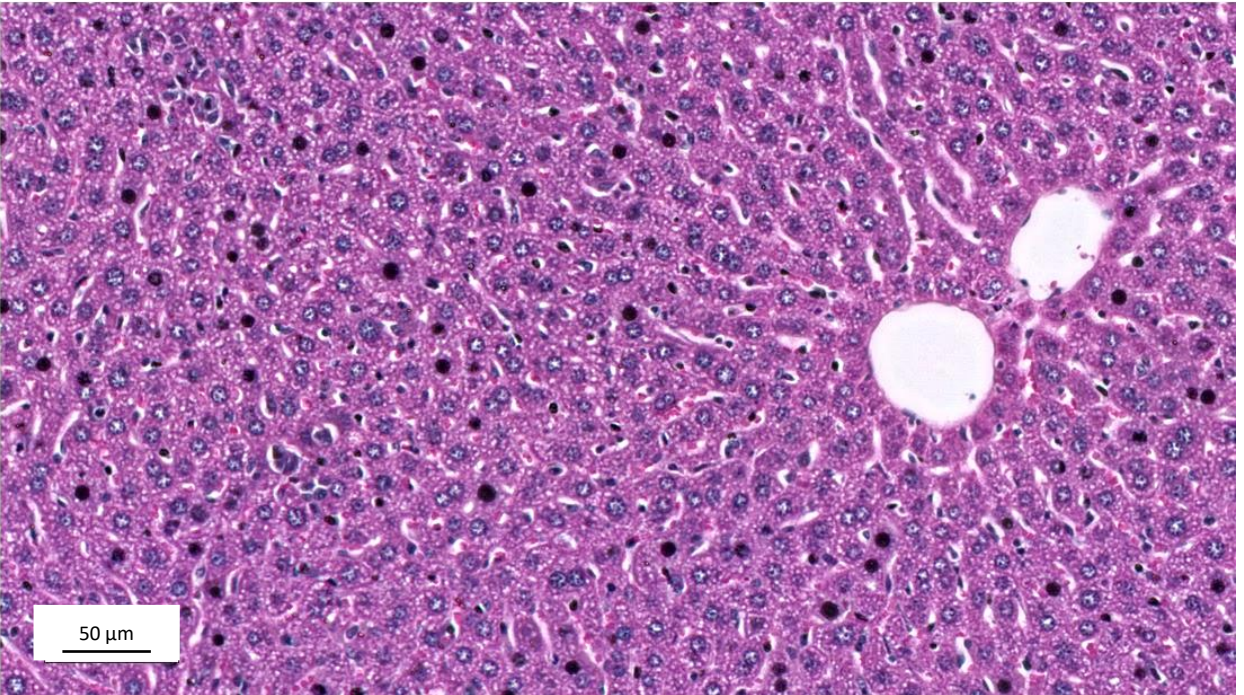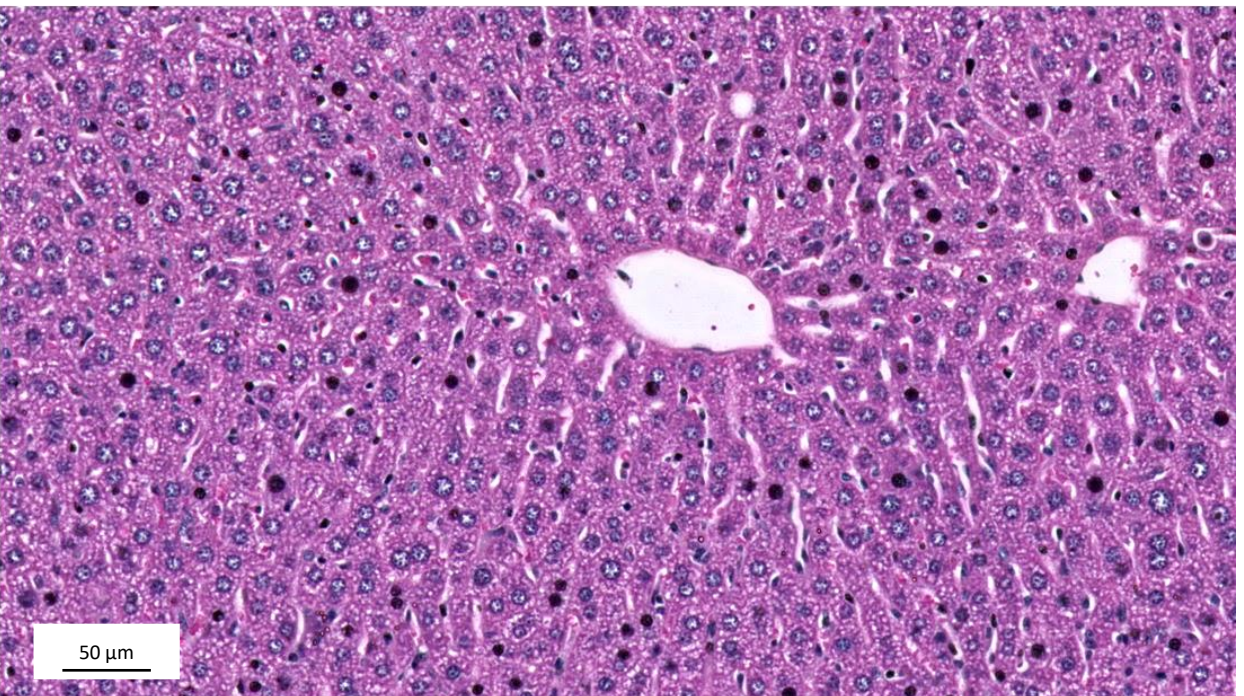

# CDHFD-5

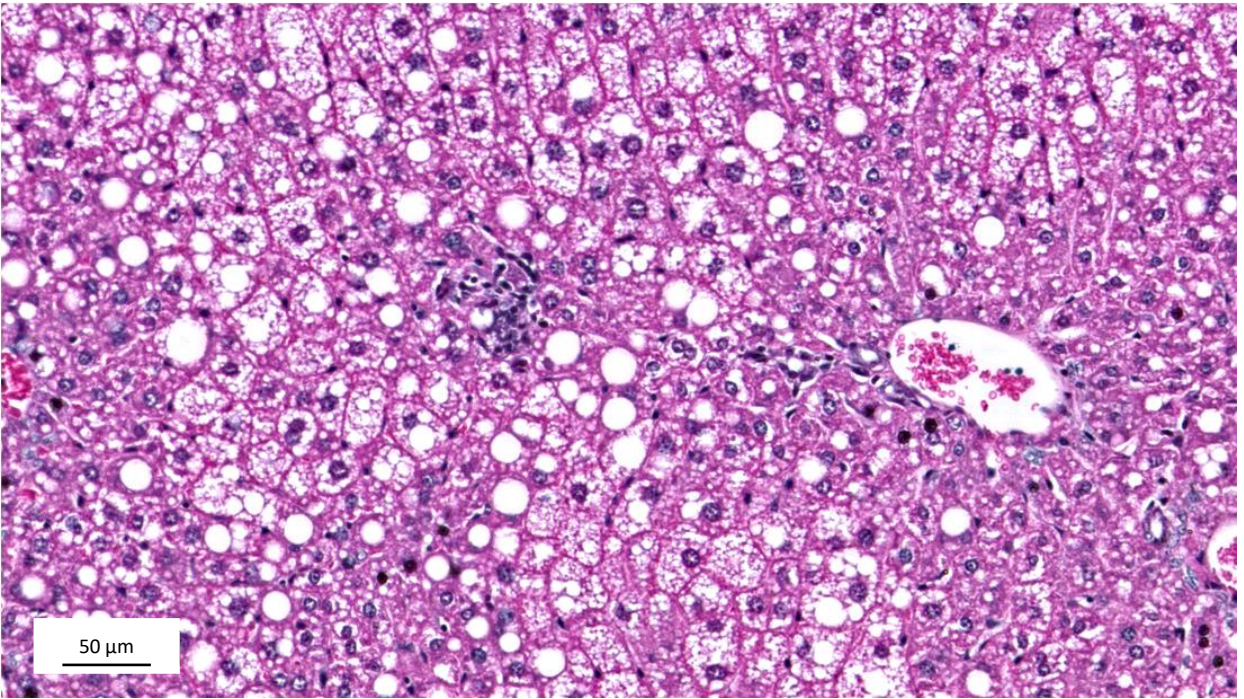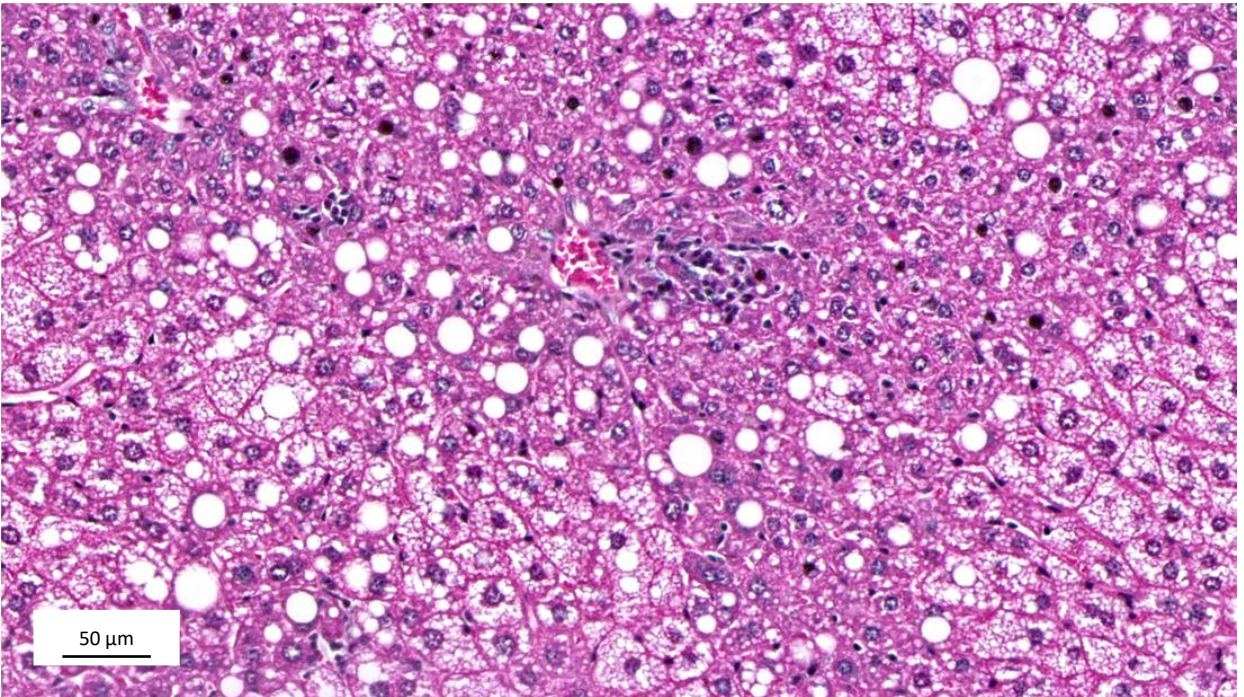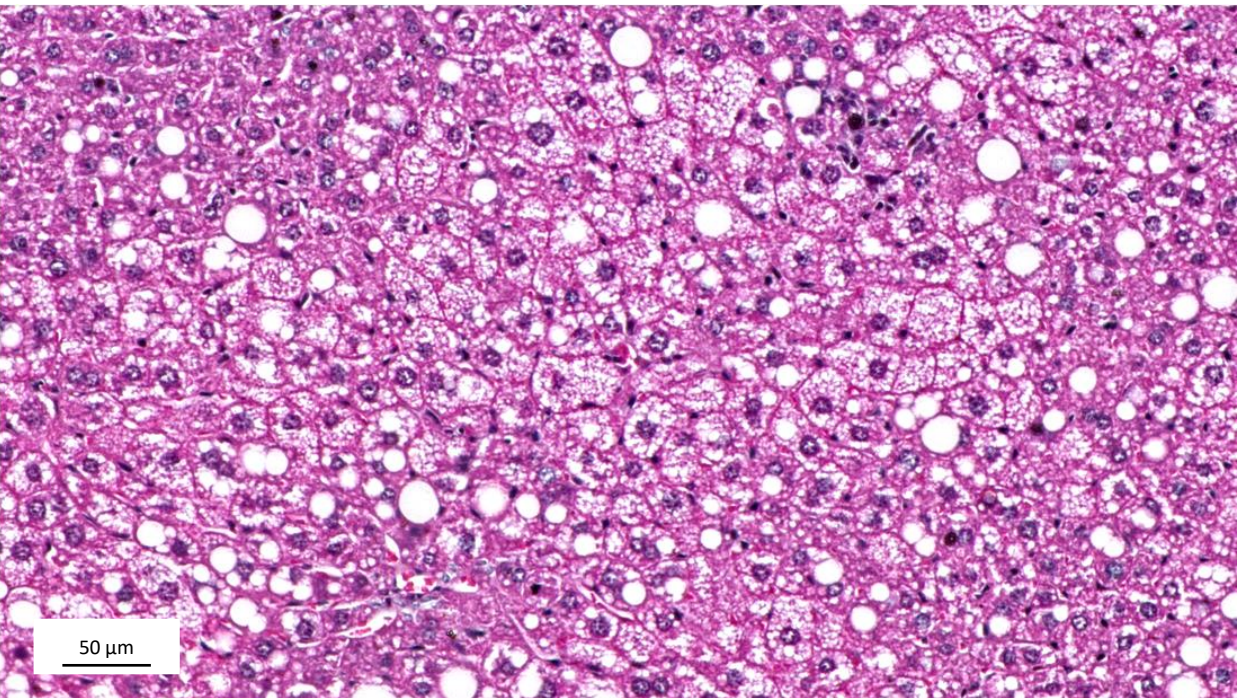

# CDHFD-6

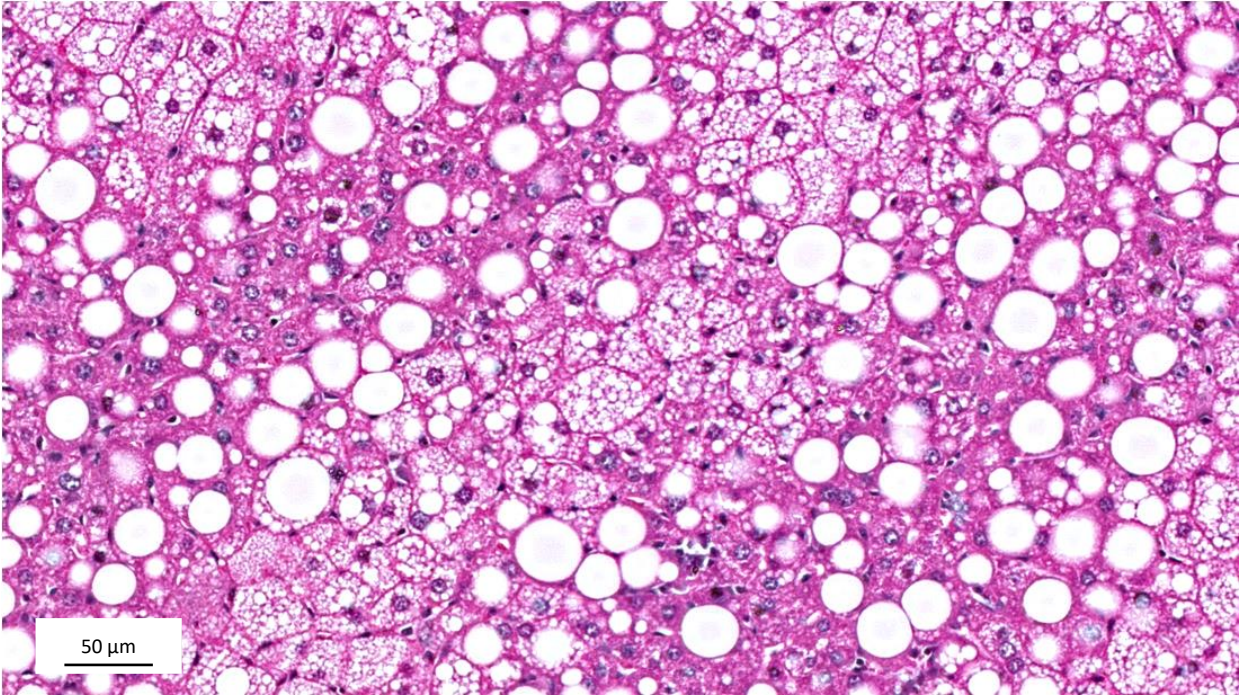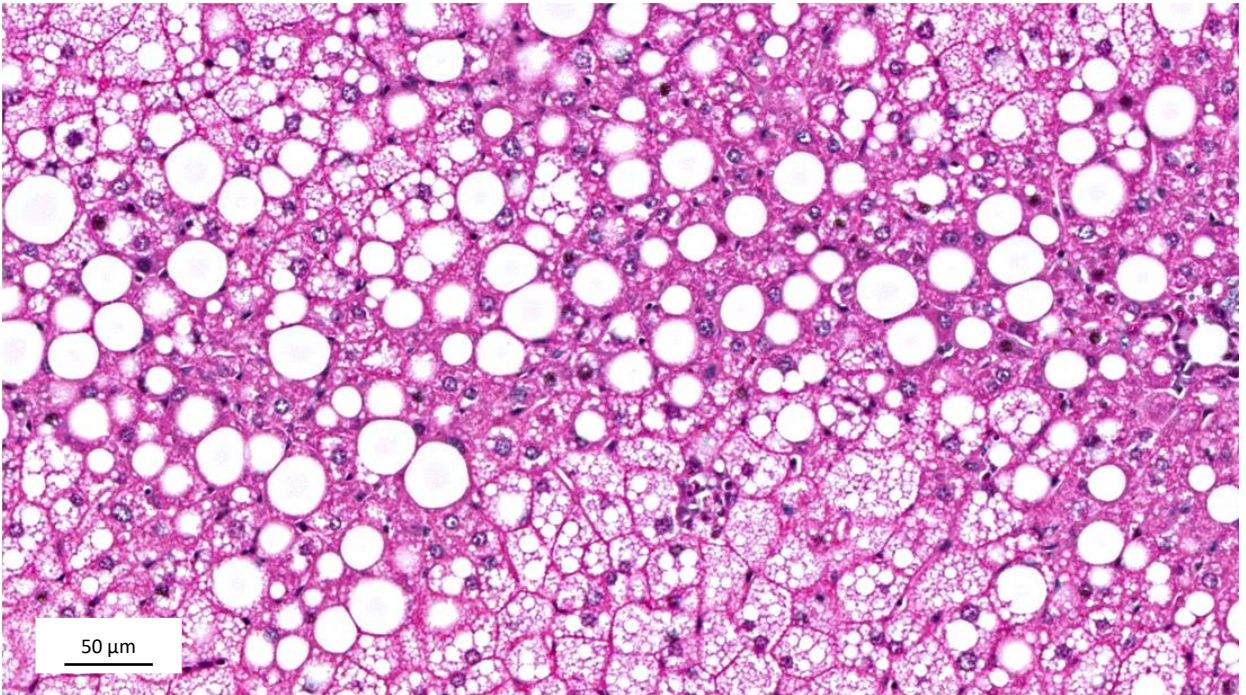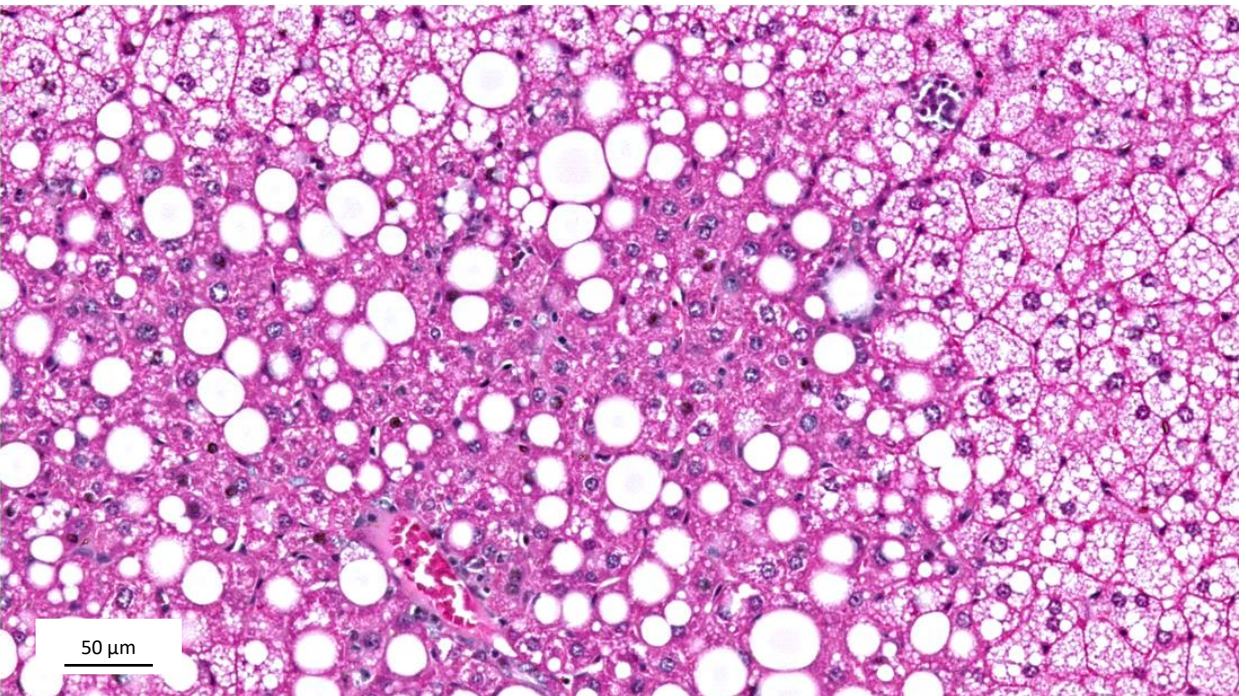

CDHFD-7

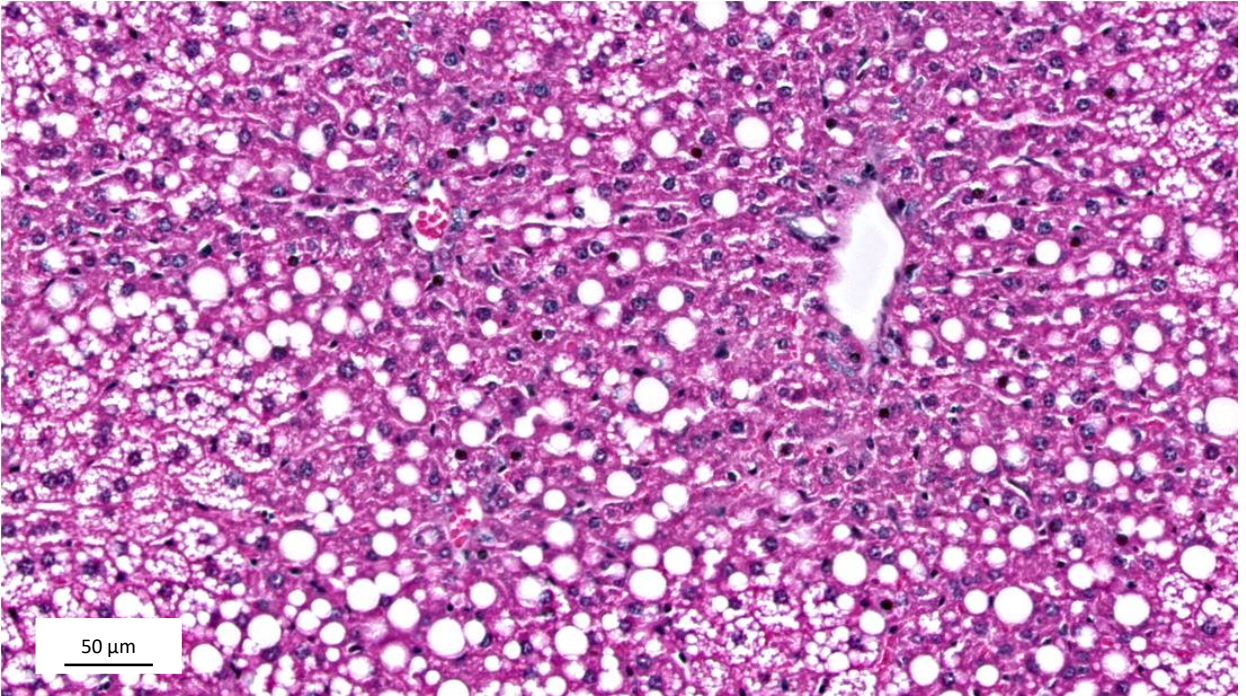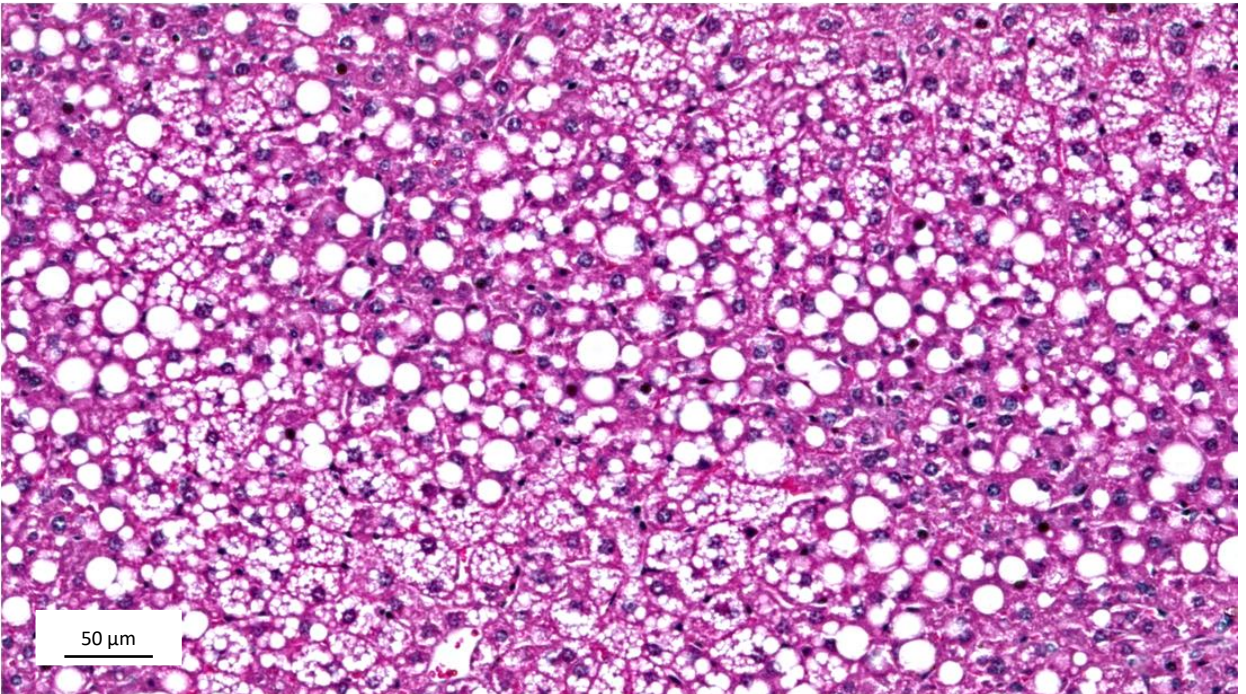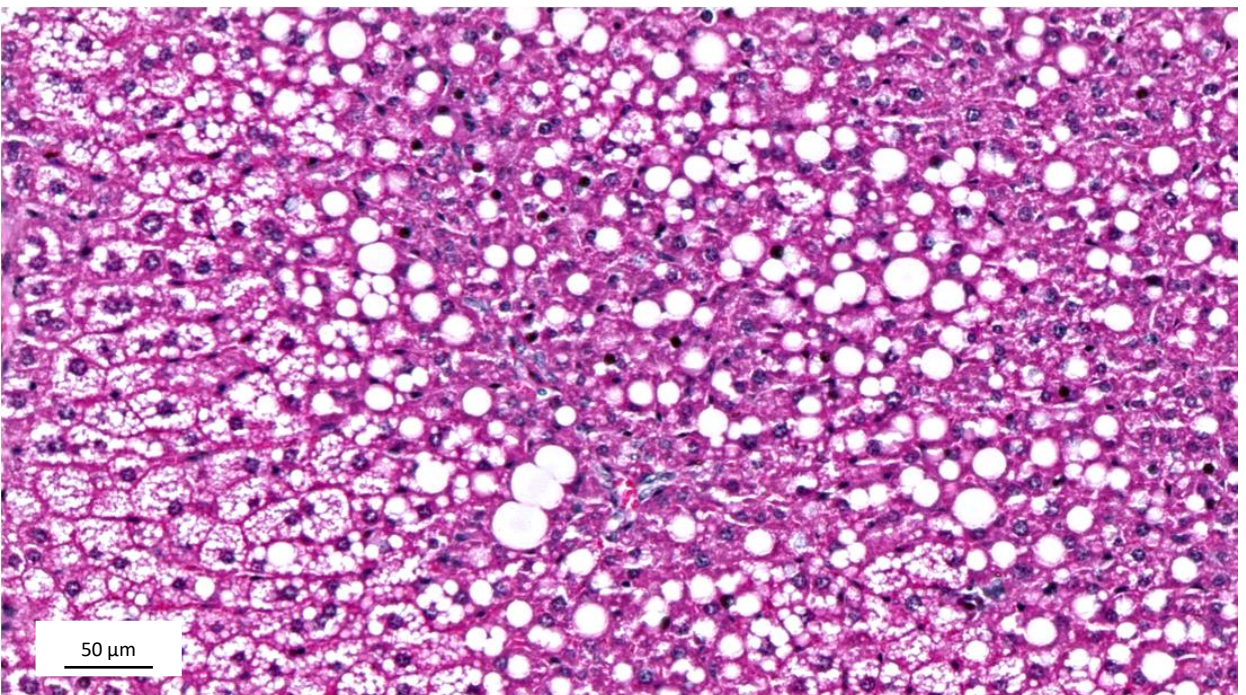

# CDHFD-8

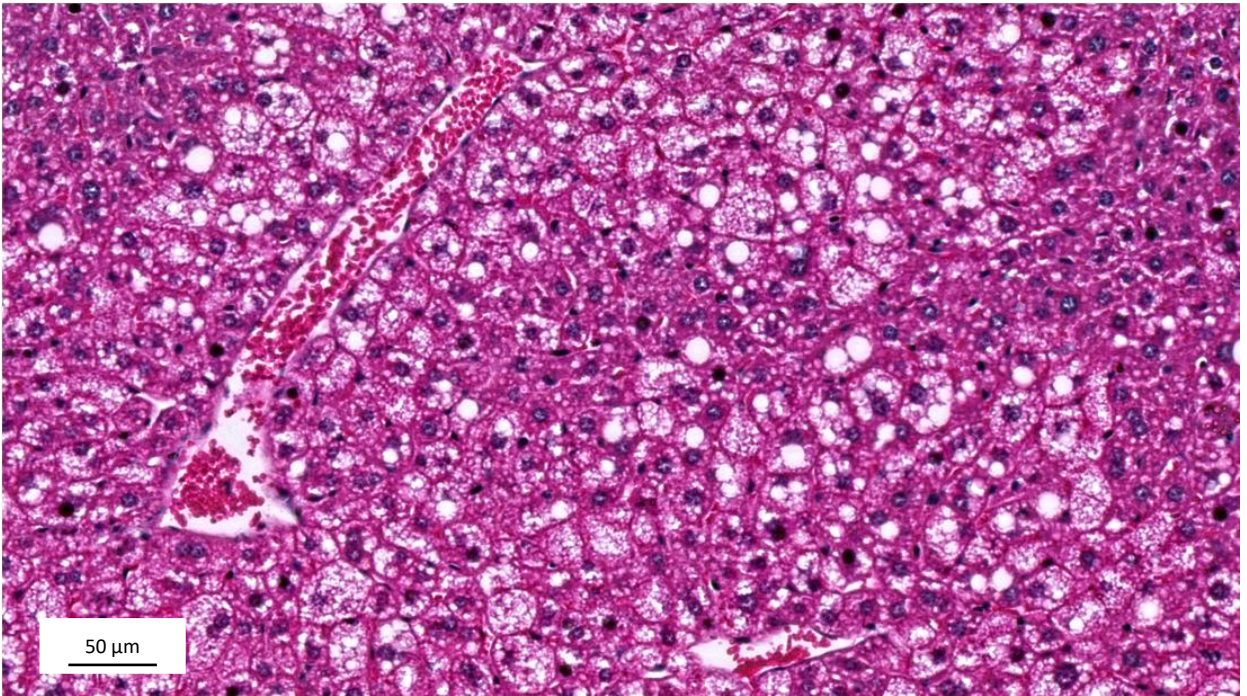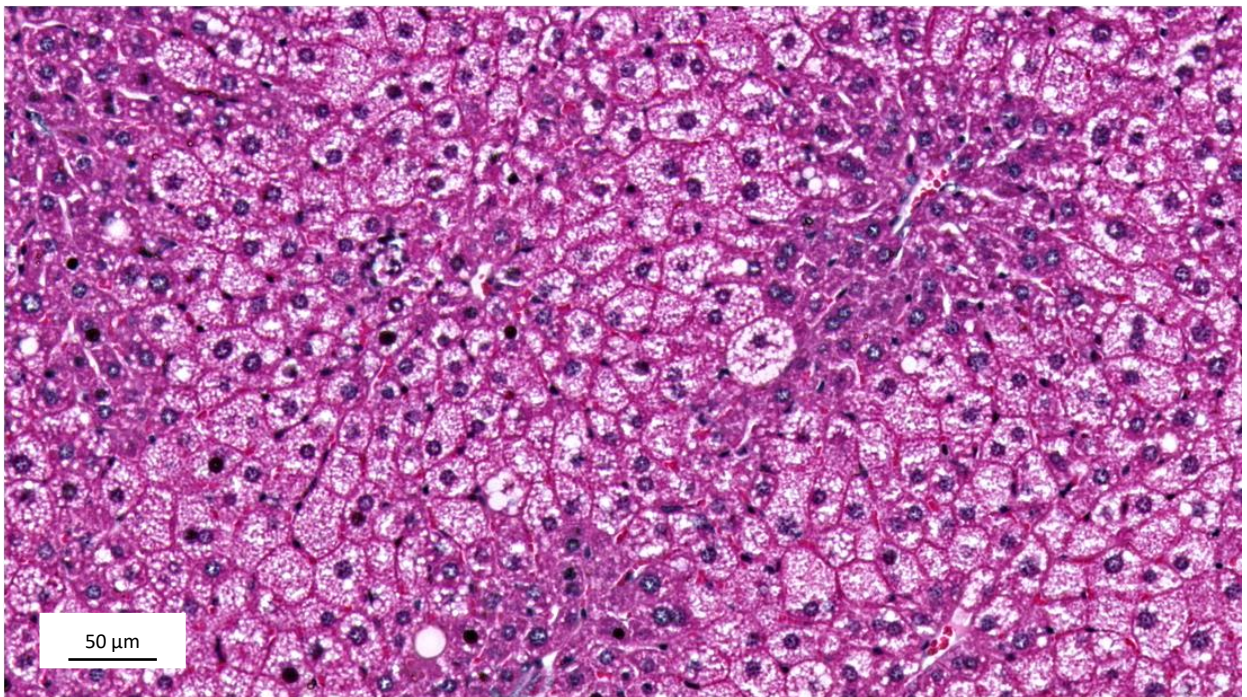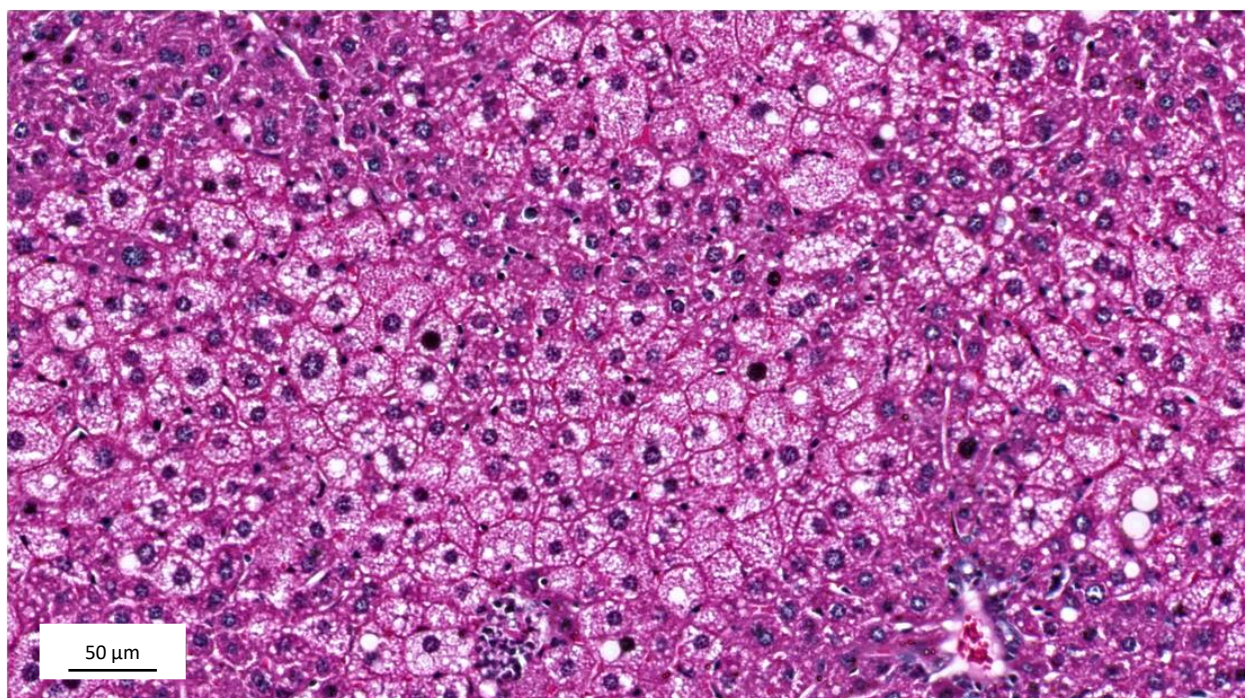

# CDHFD-9

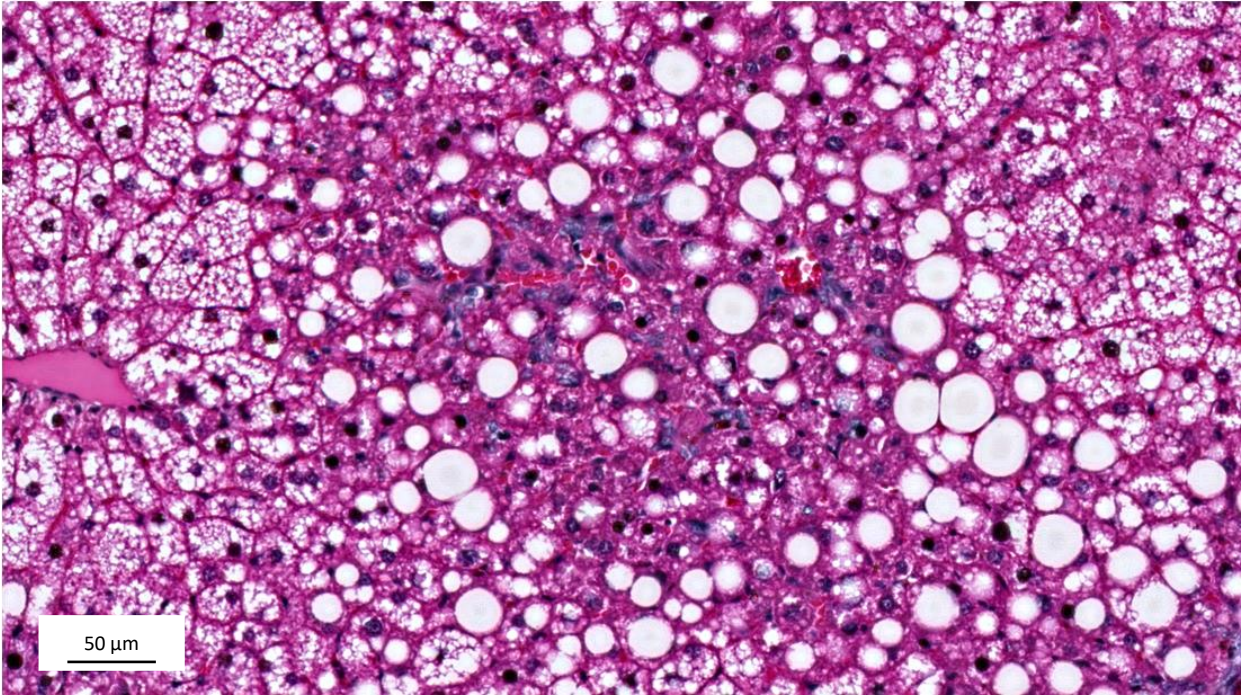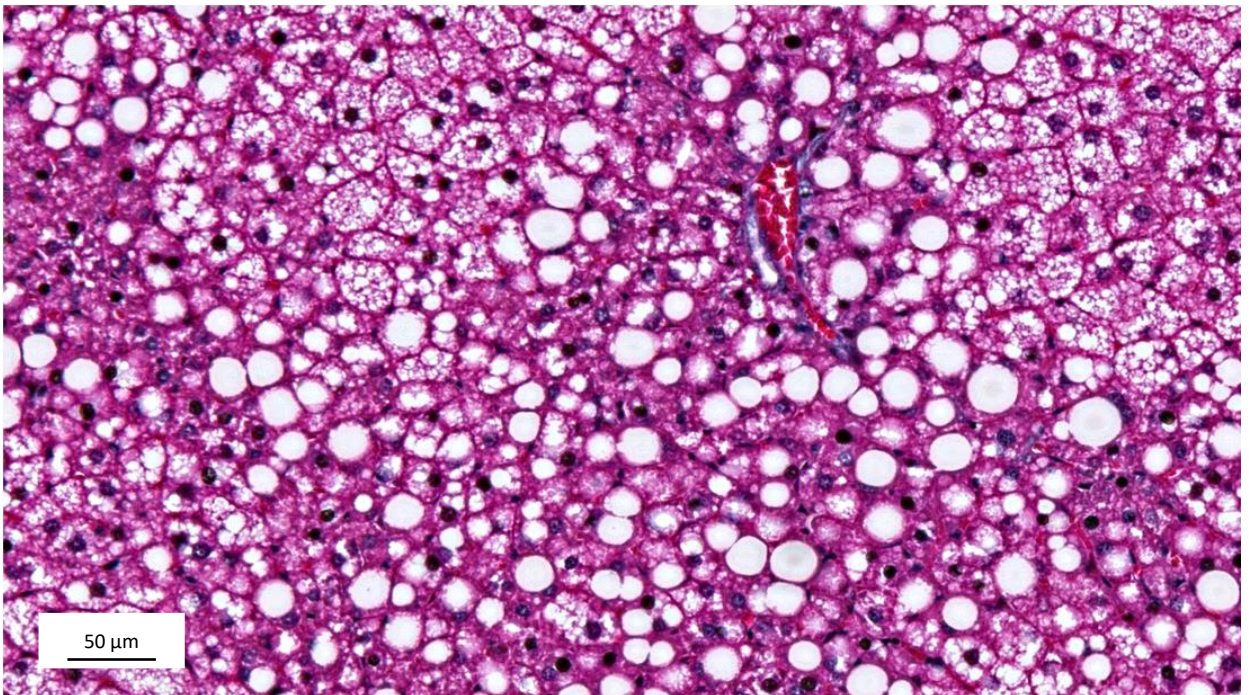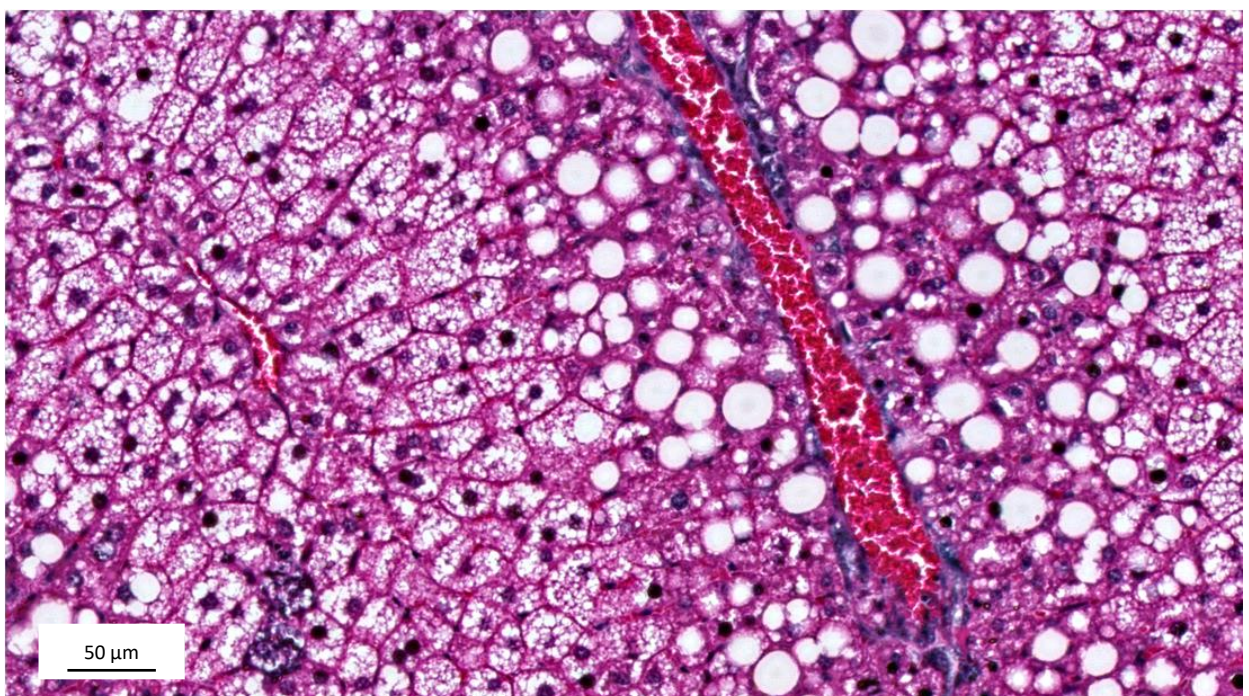

# CDHFD-10

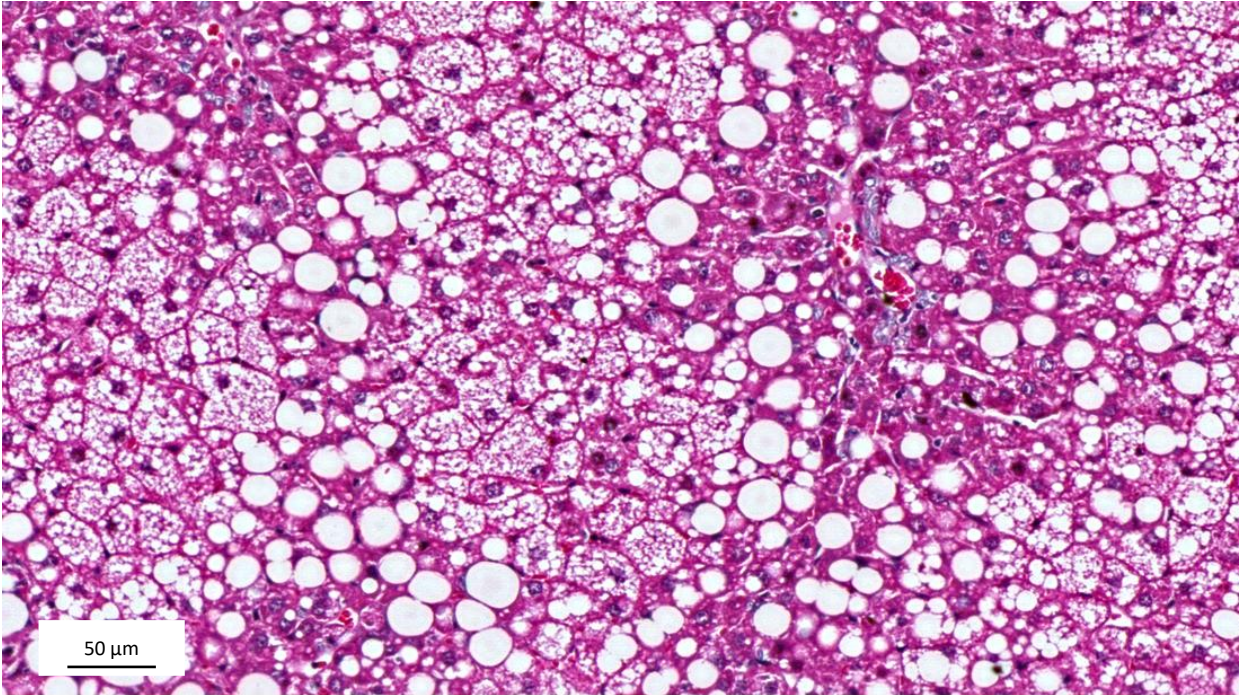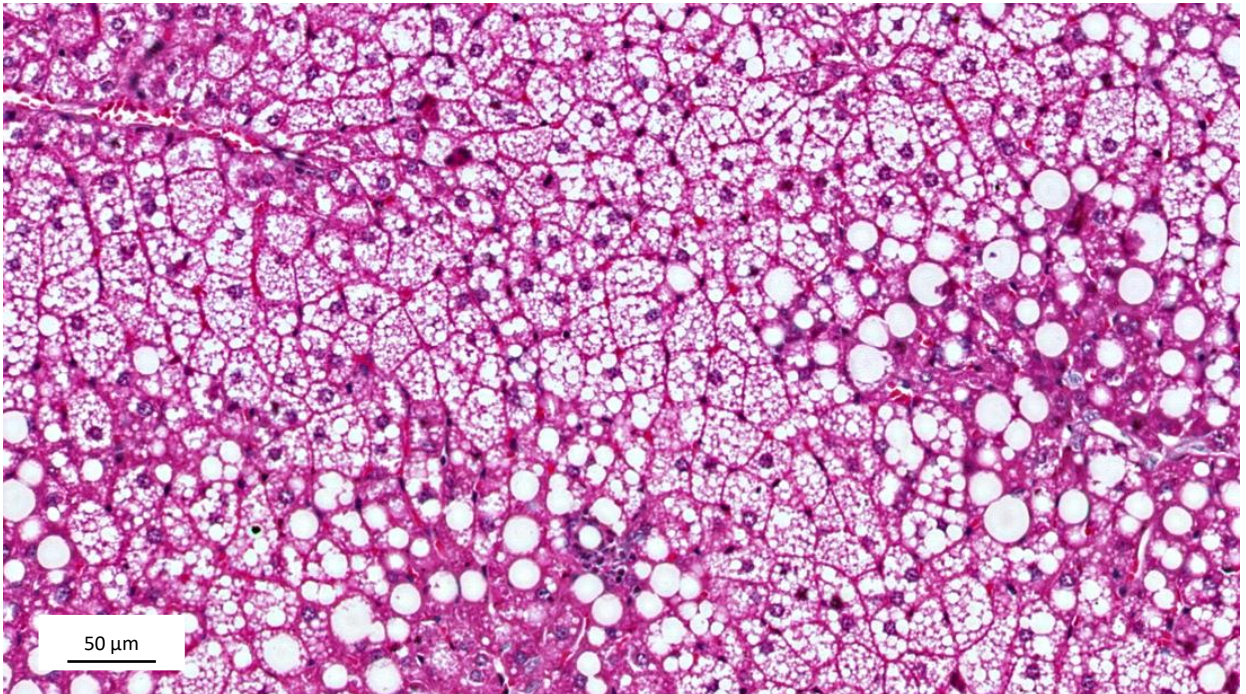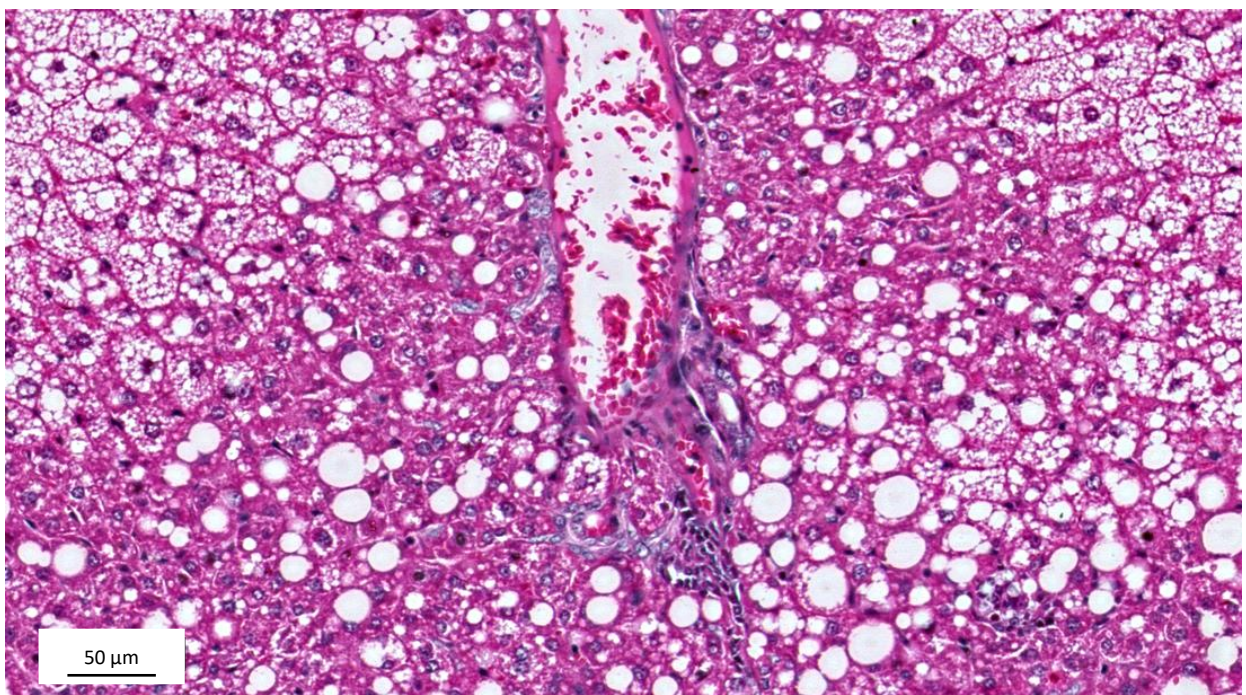

# CDHFD-11

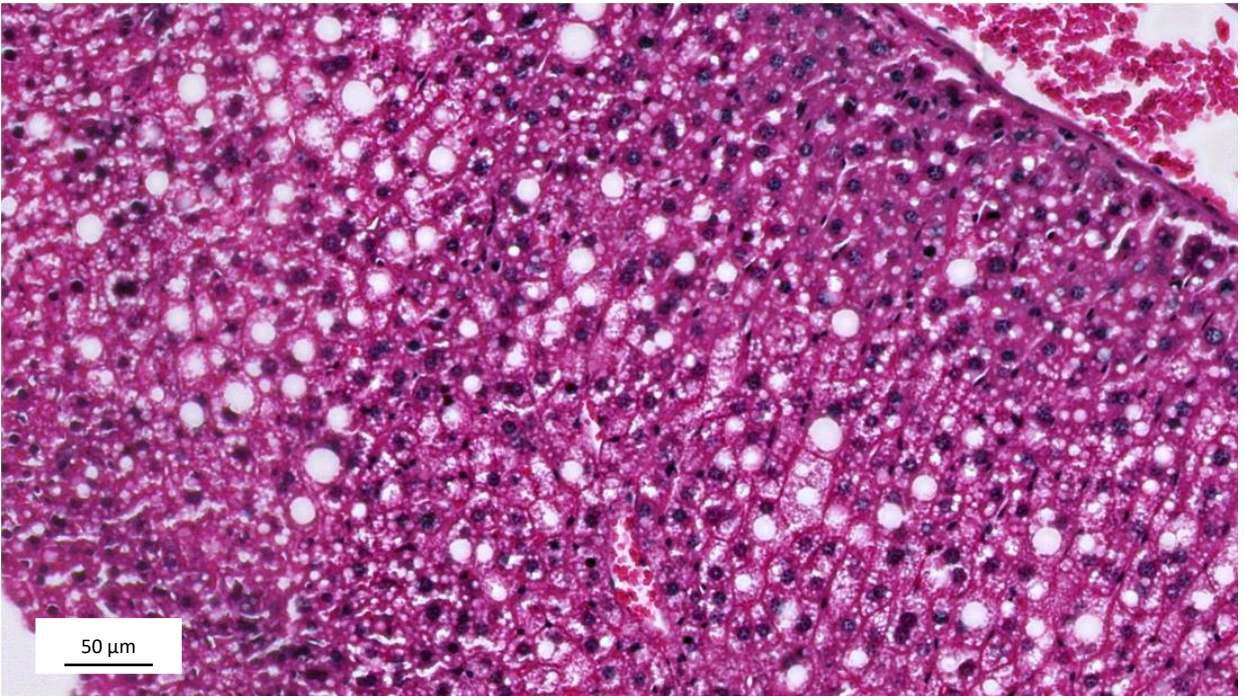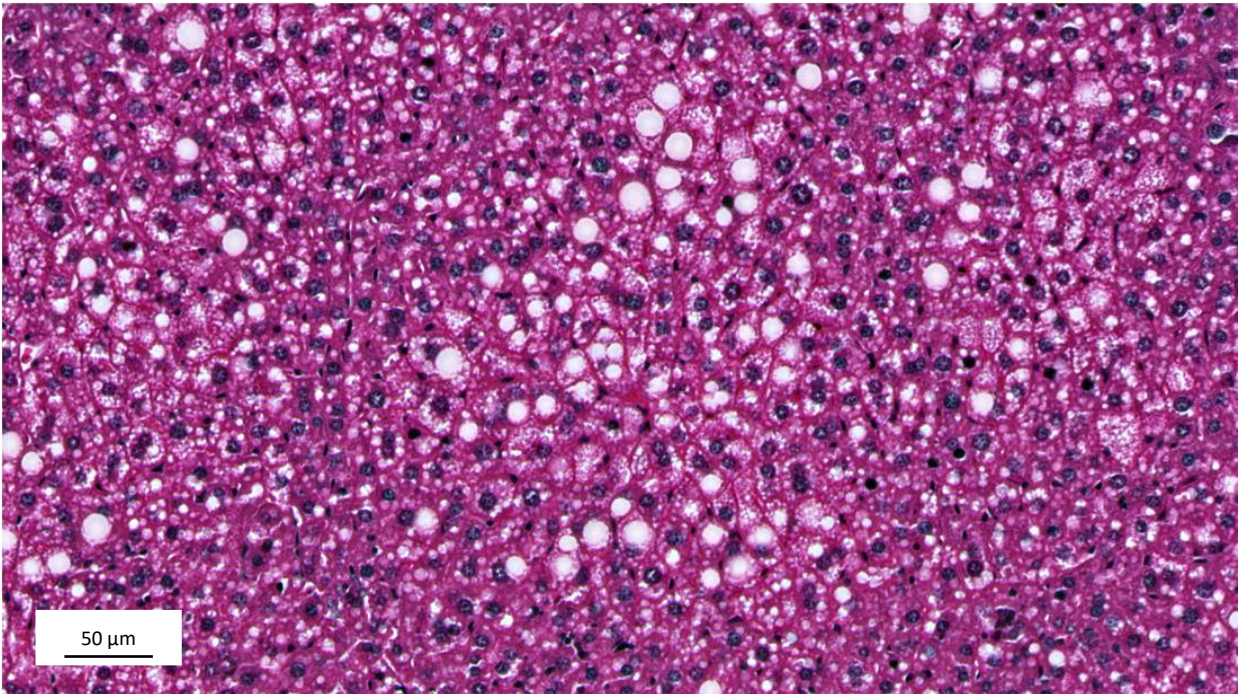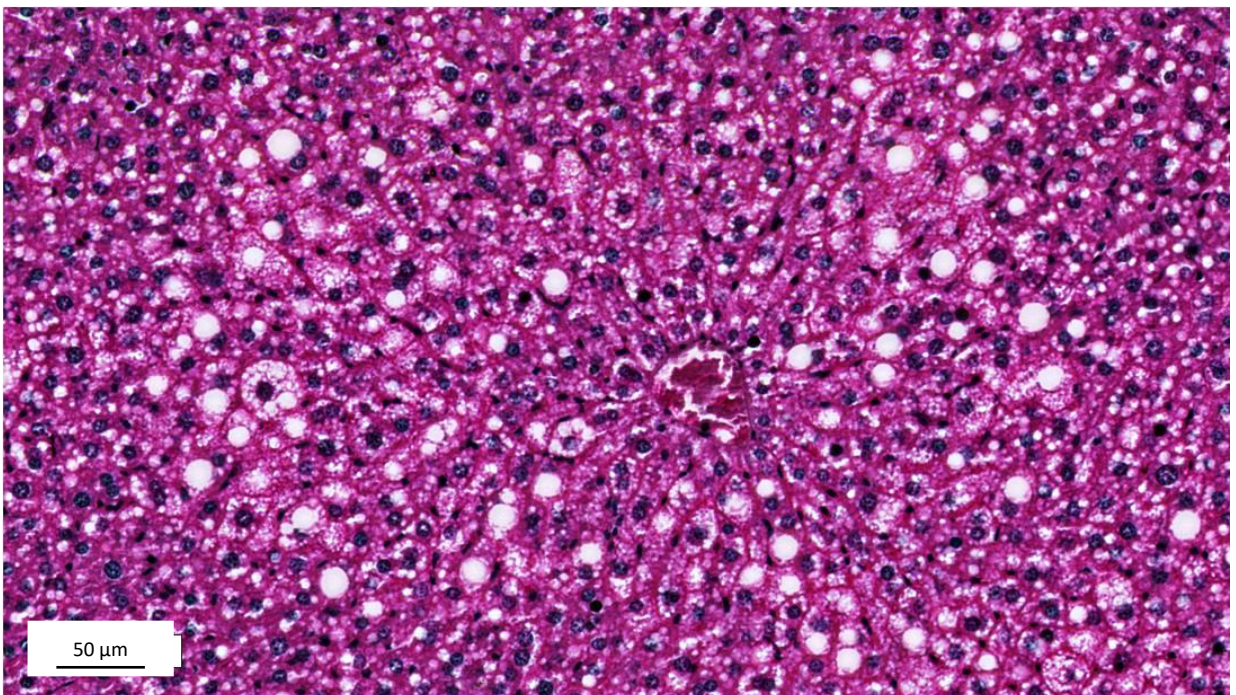



# CDHFD-12

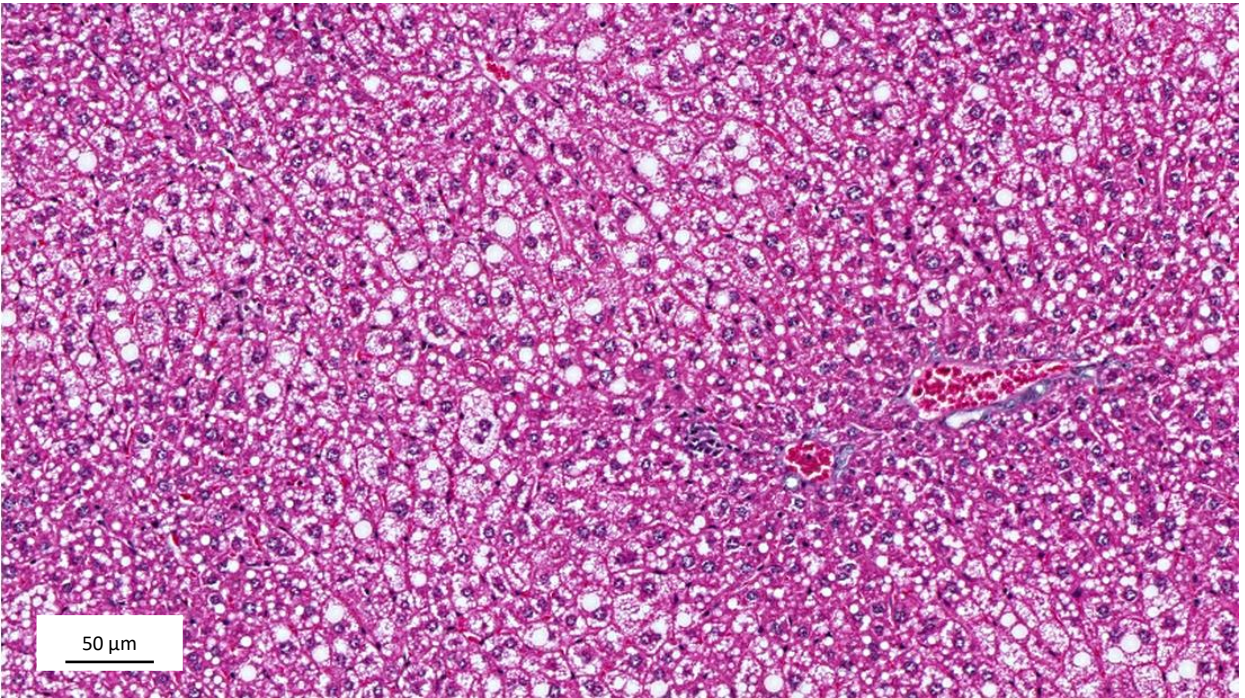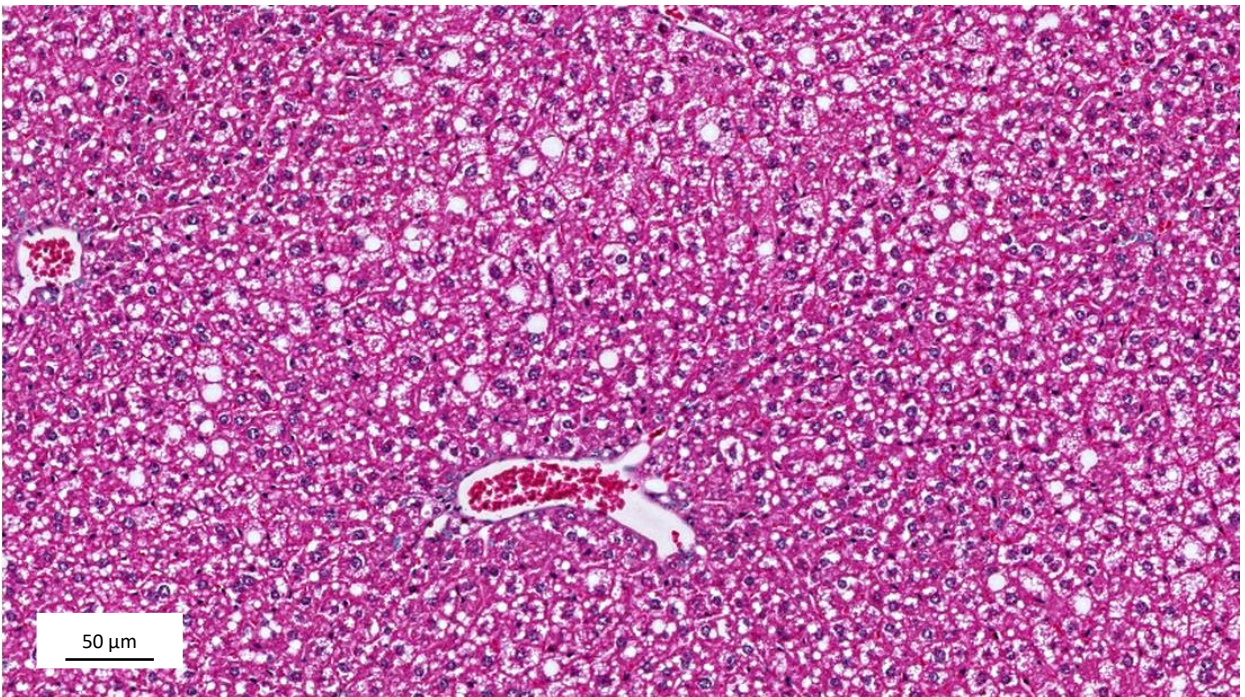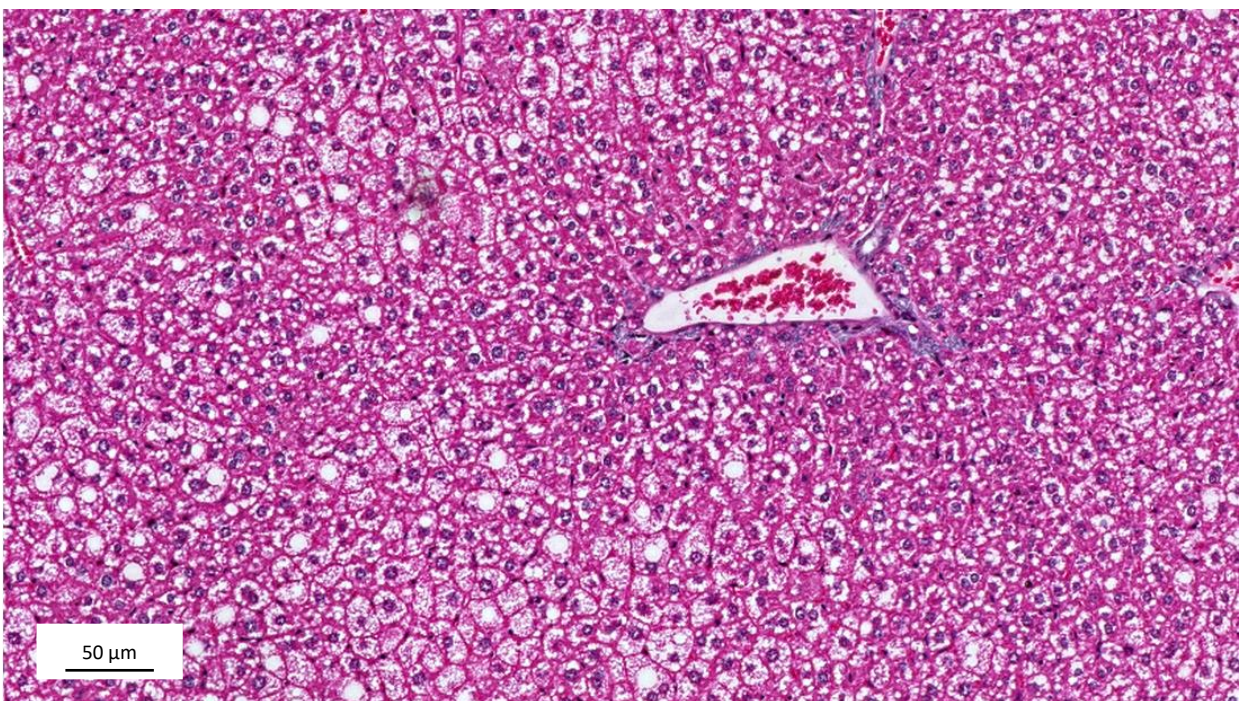

# CDHFD-13

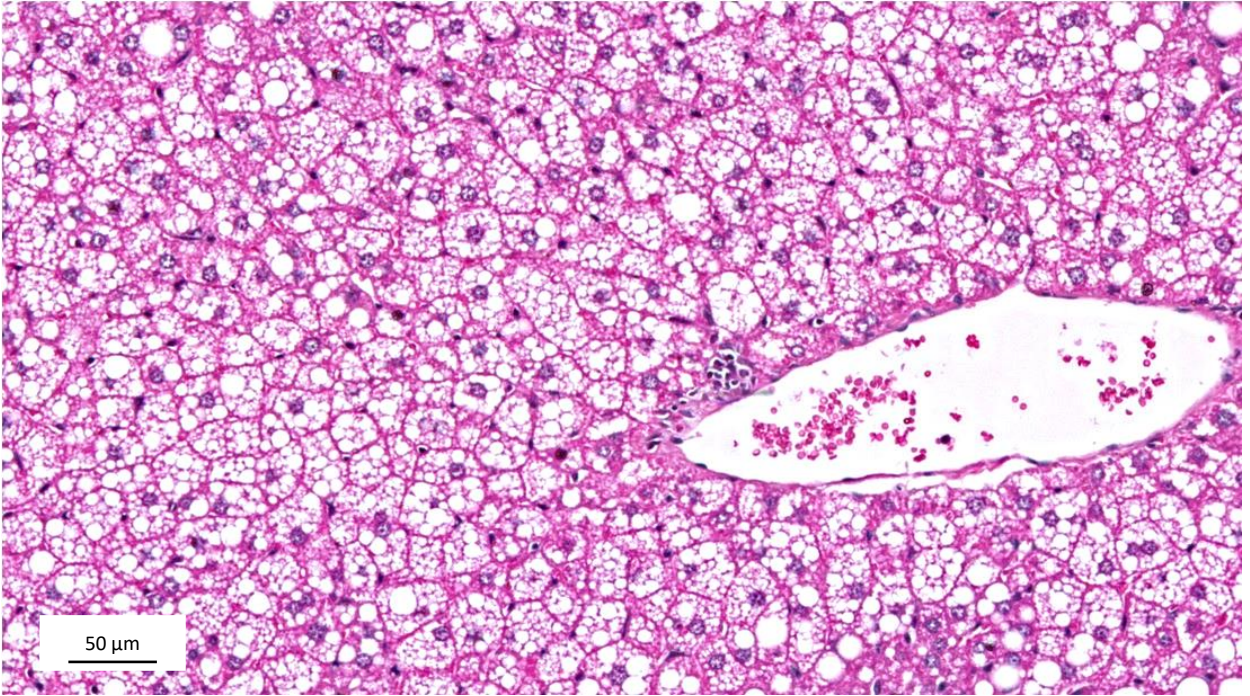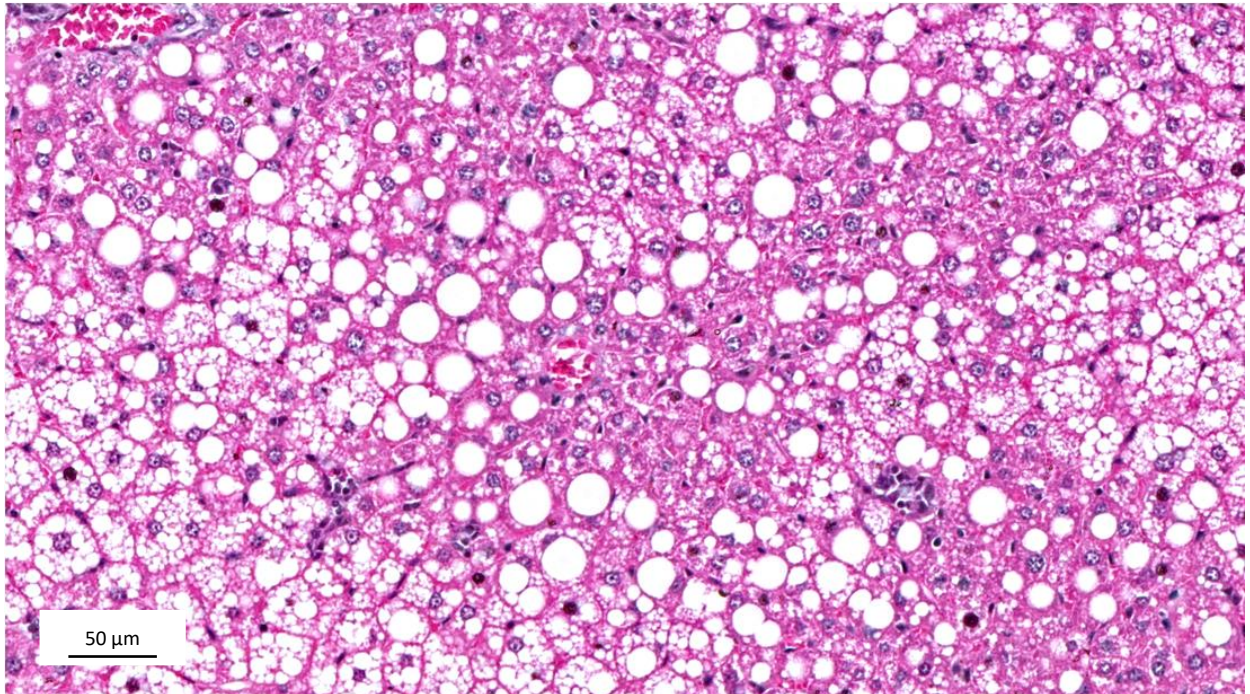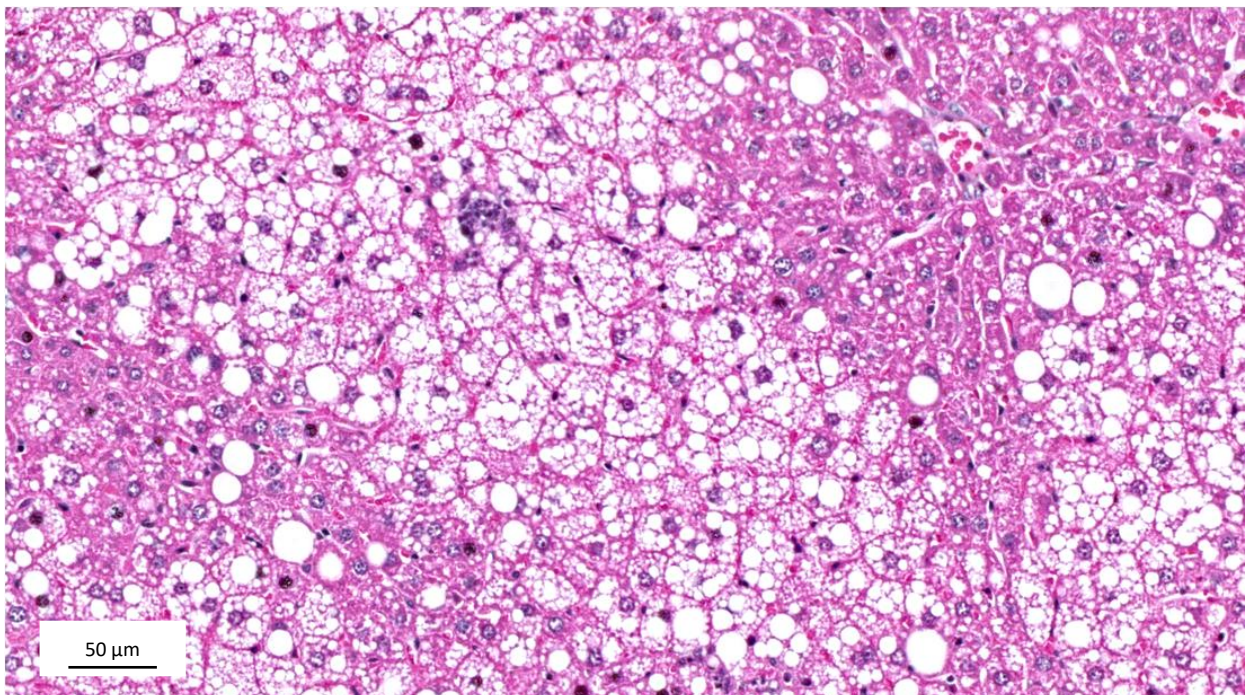

**H&E Staining**

**CDHFD-I group**

(15 mice were included)

# CDHFD-I-1

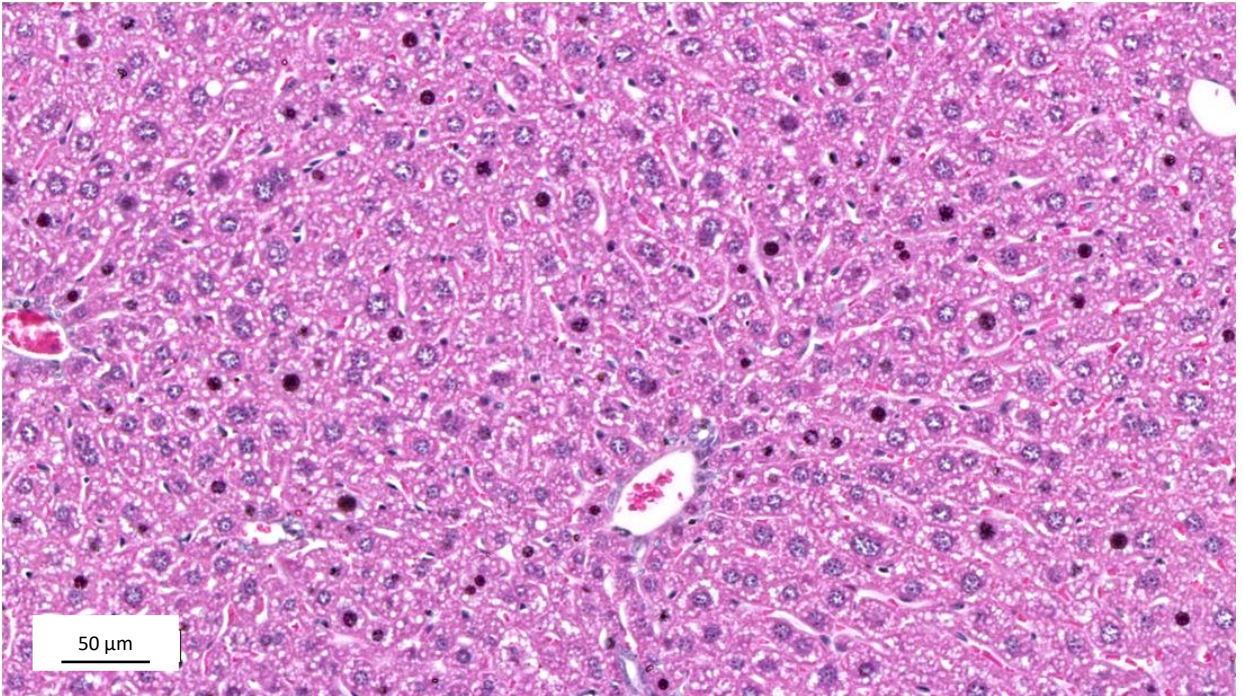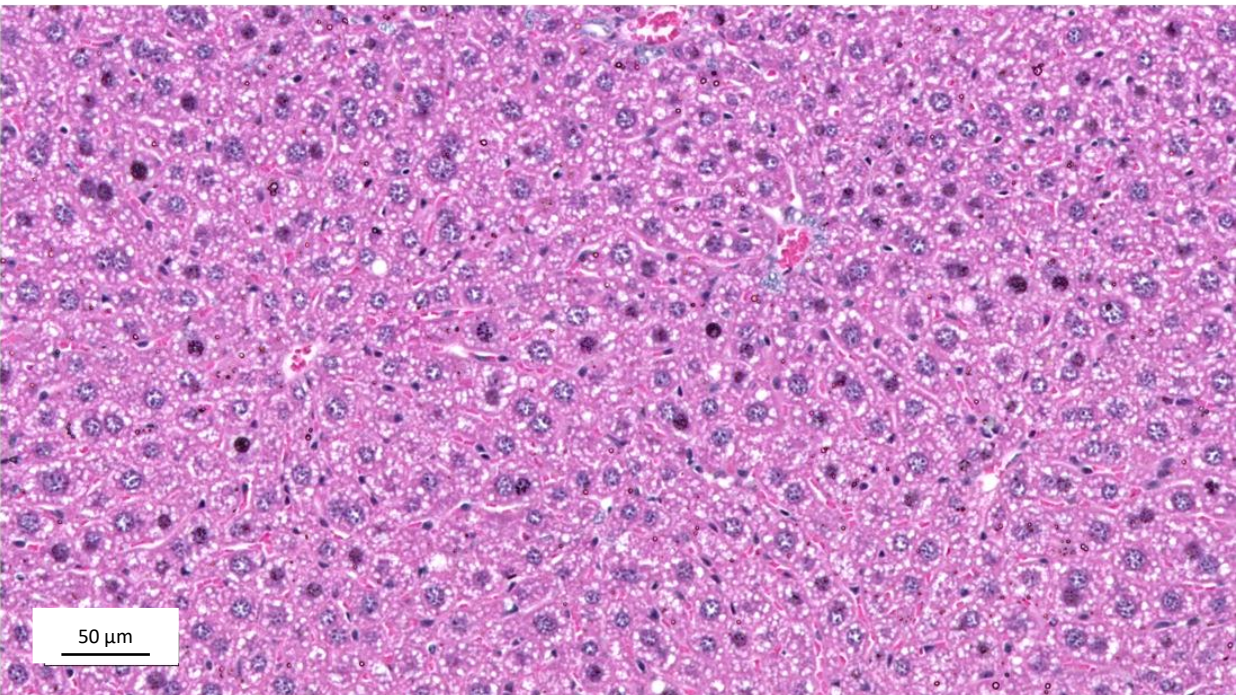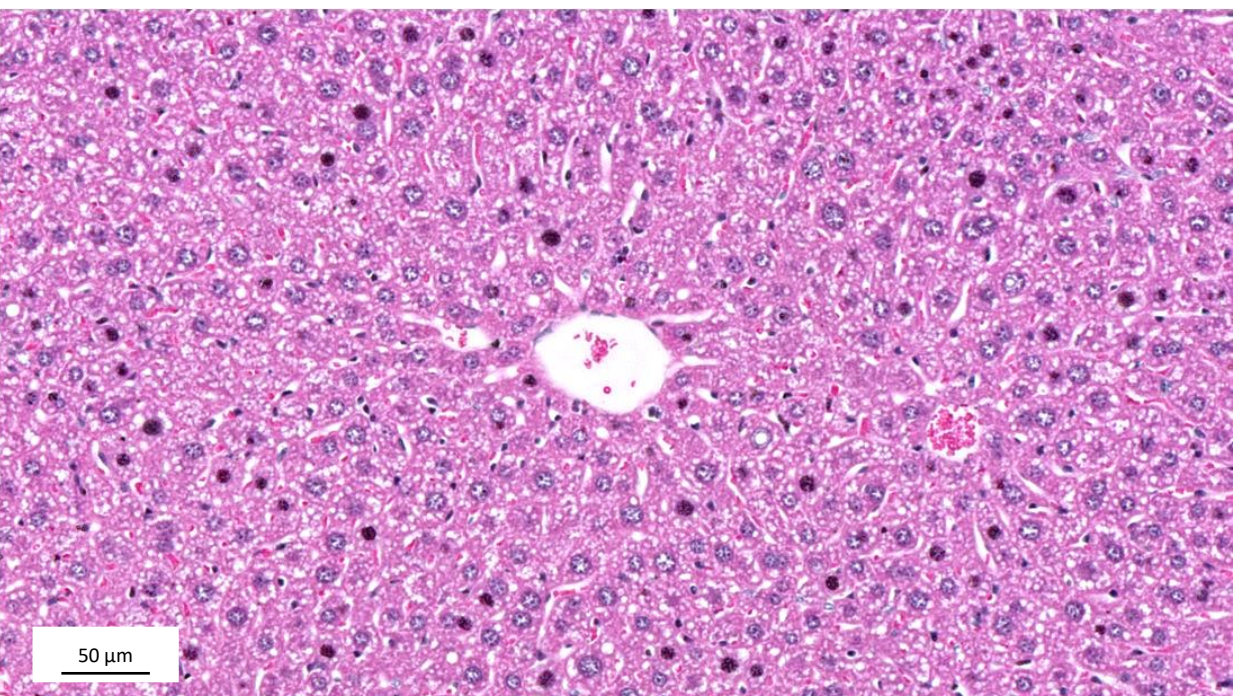

# CDHFD-I-2

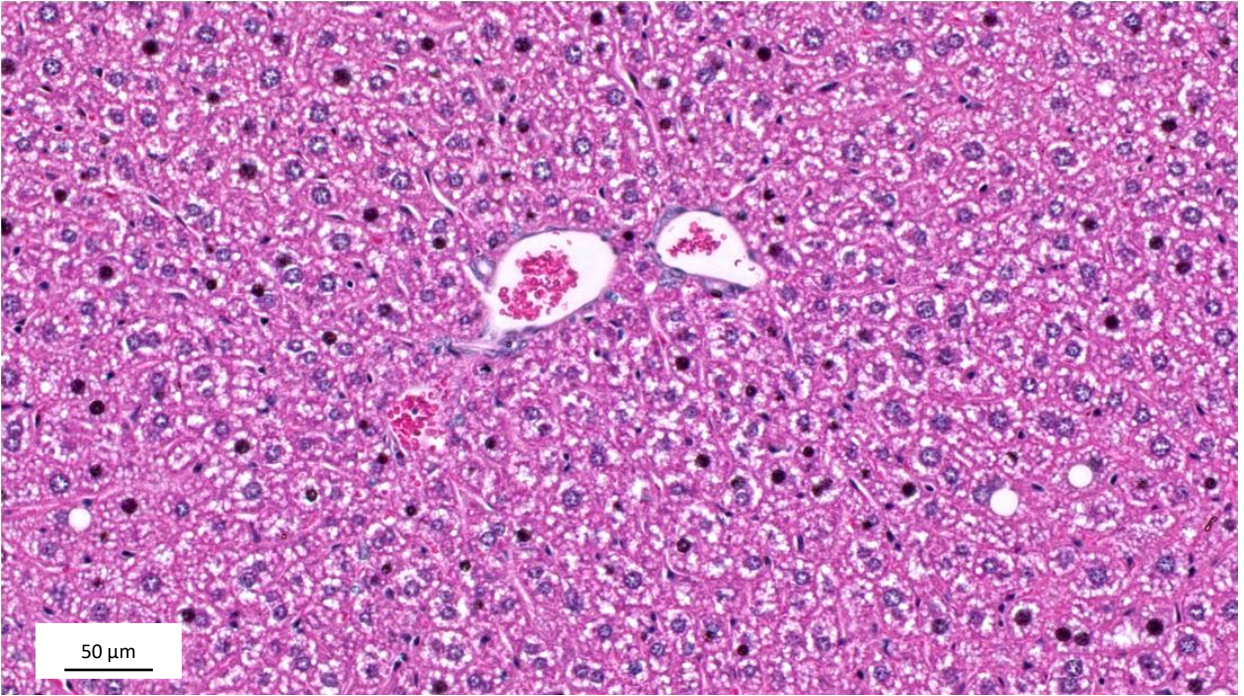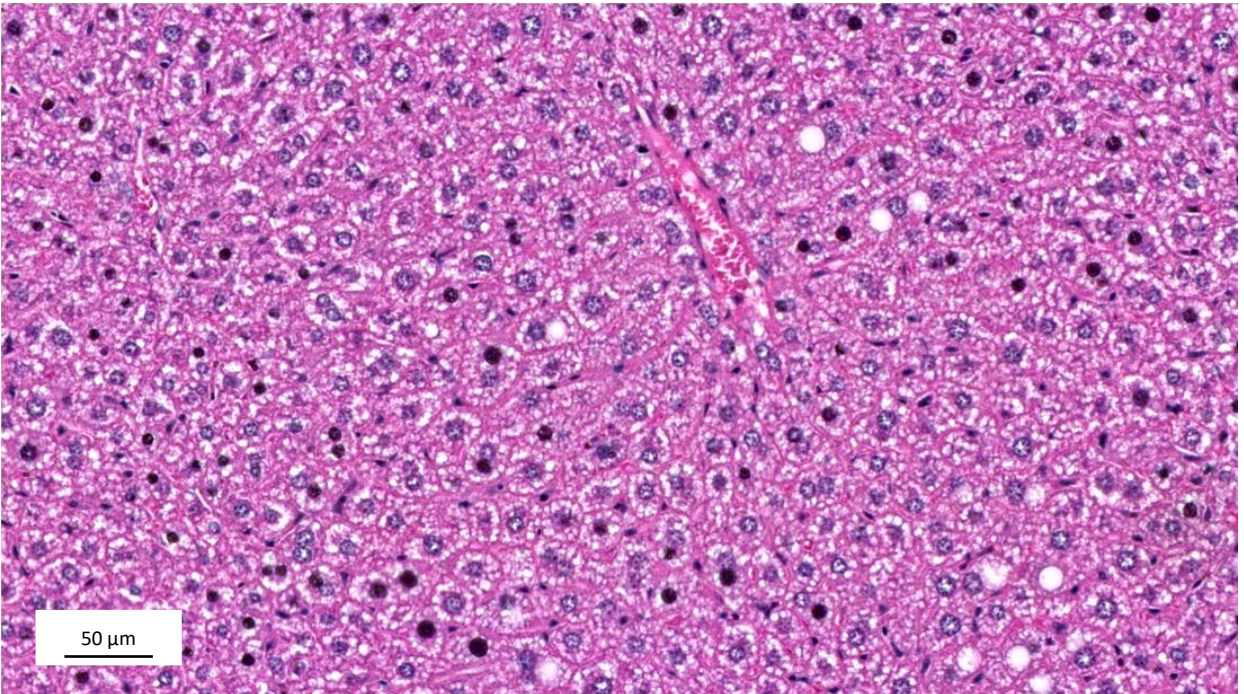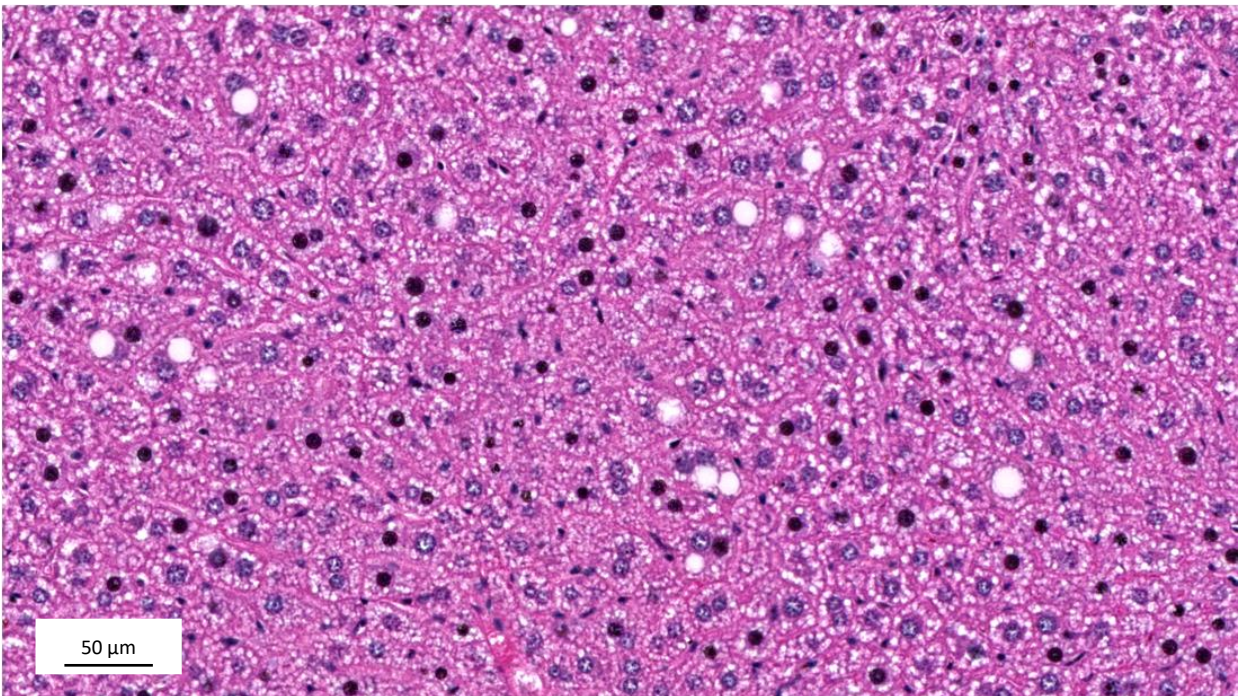

# CDHFD-I-3

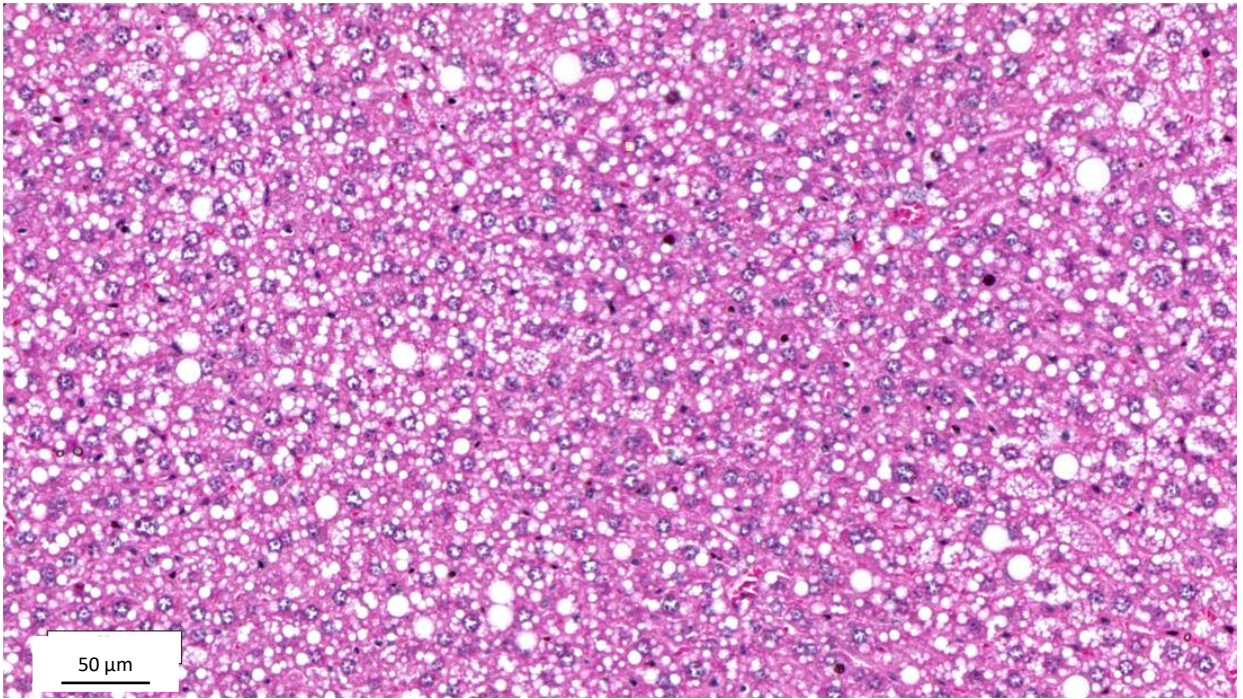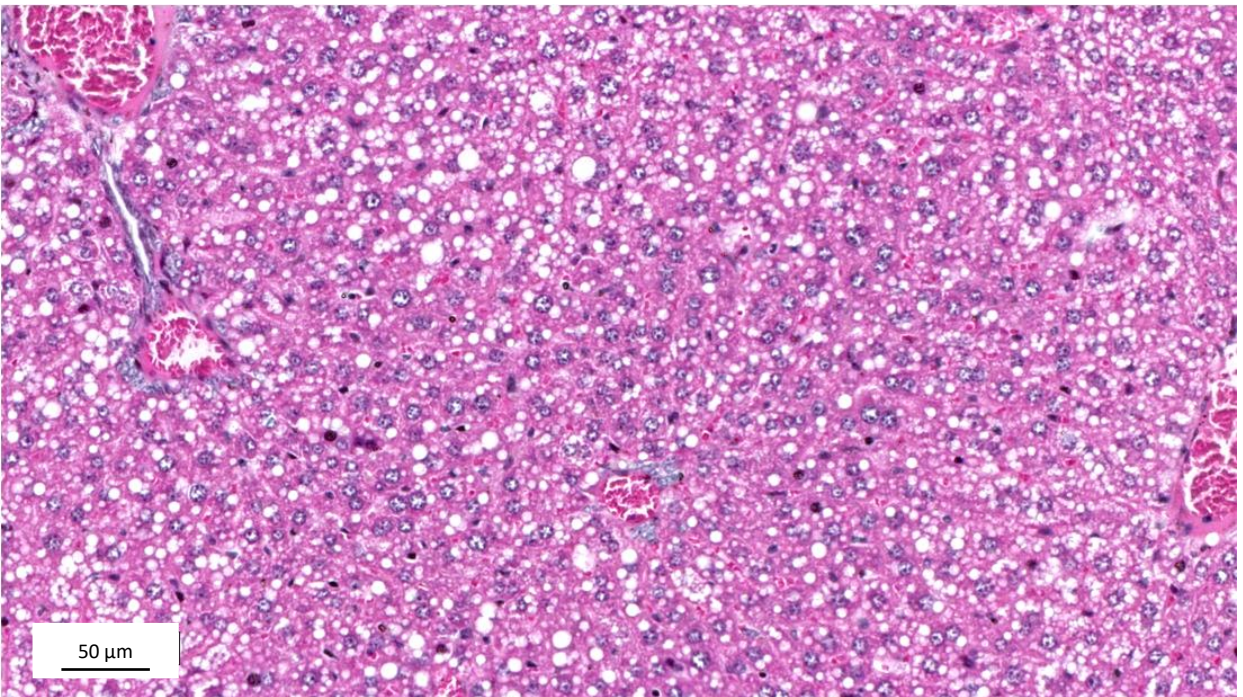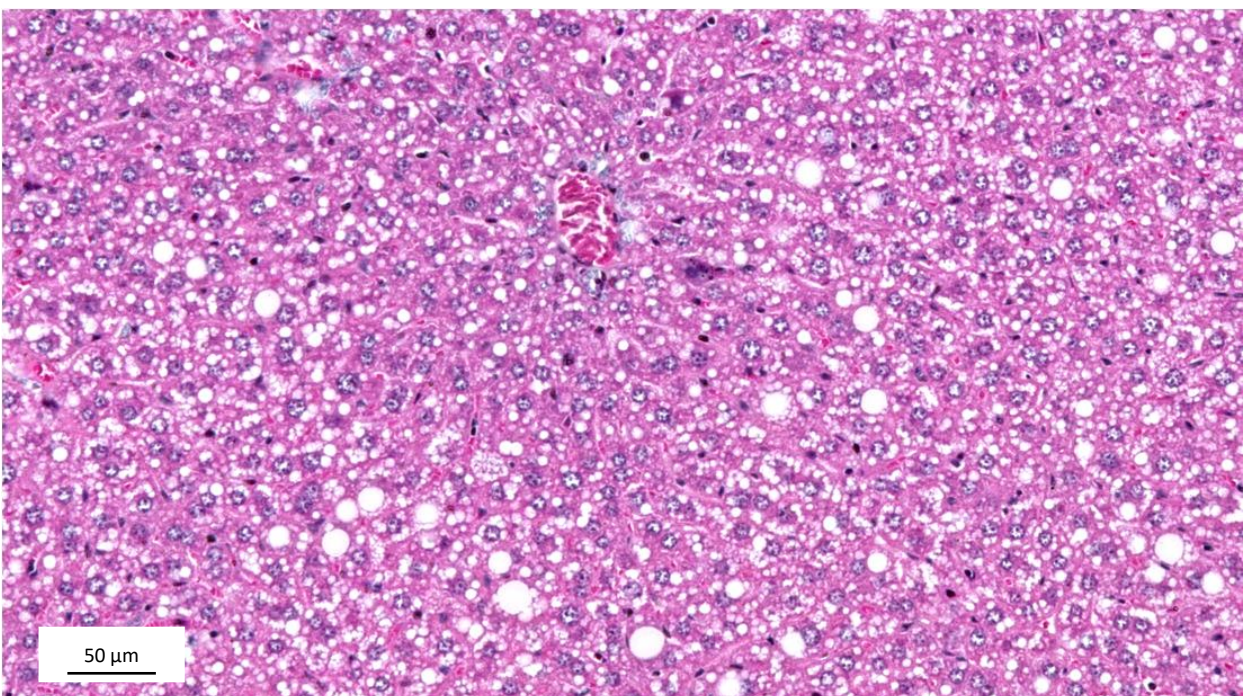

# CDHFD-I-4

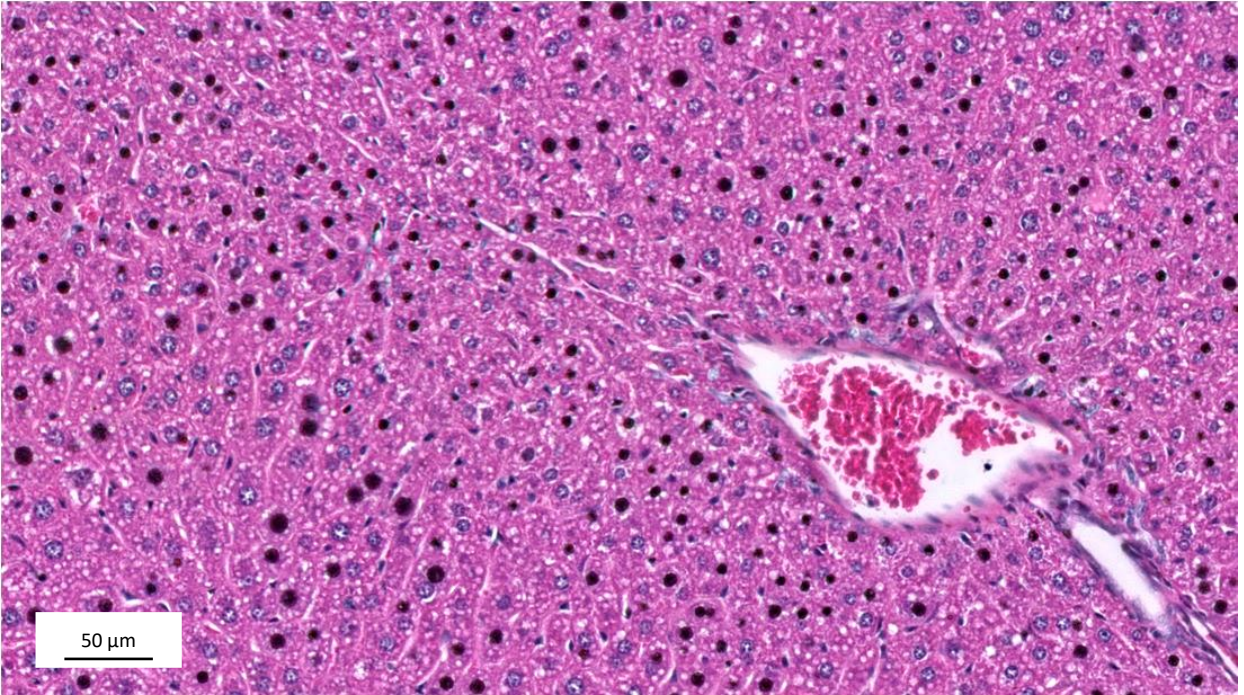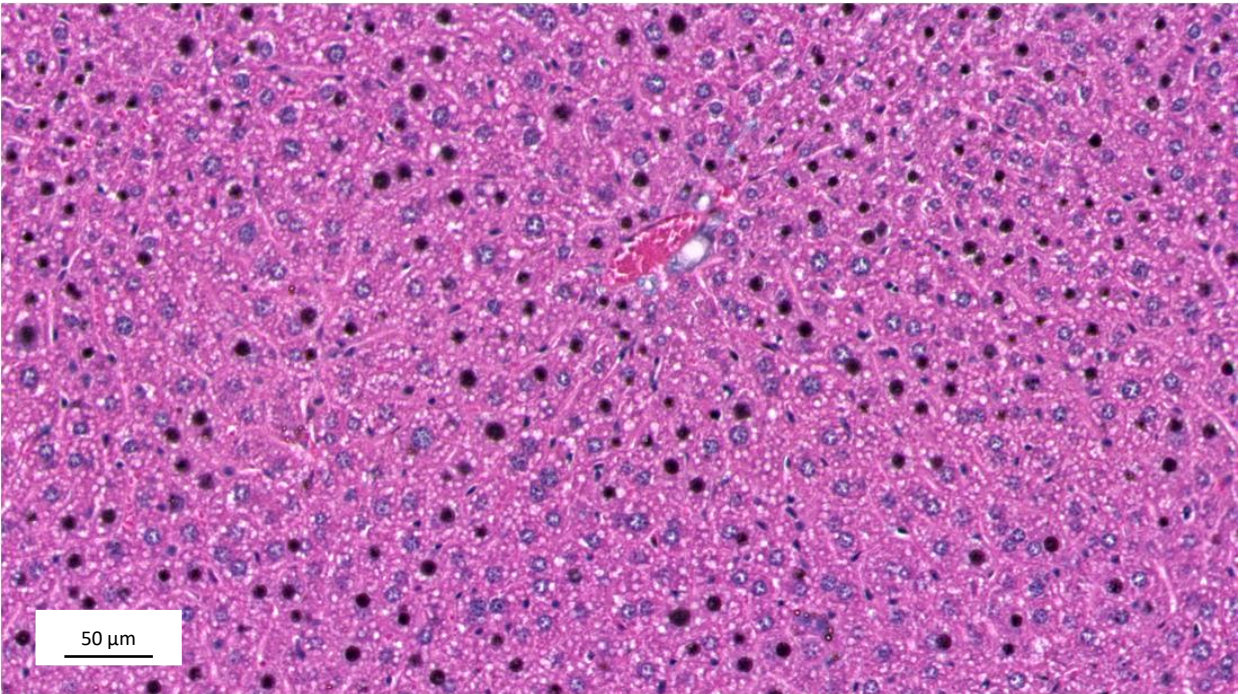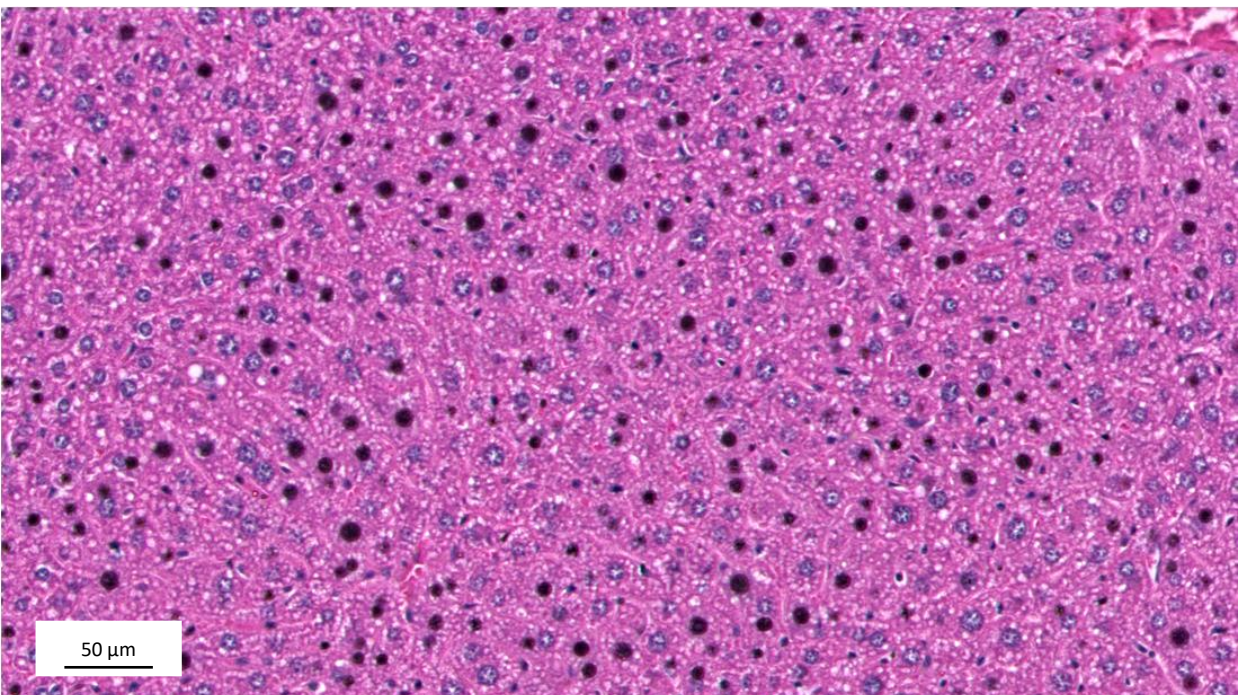

CDHFD-I-5

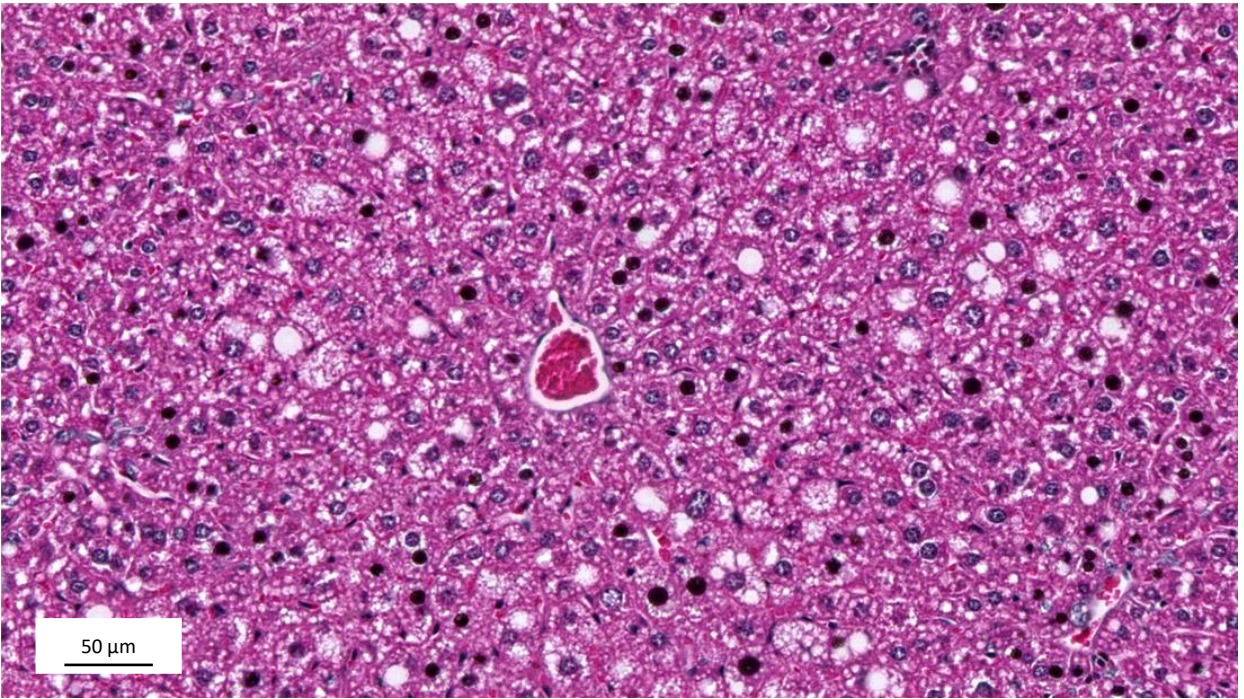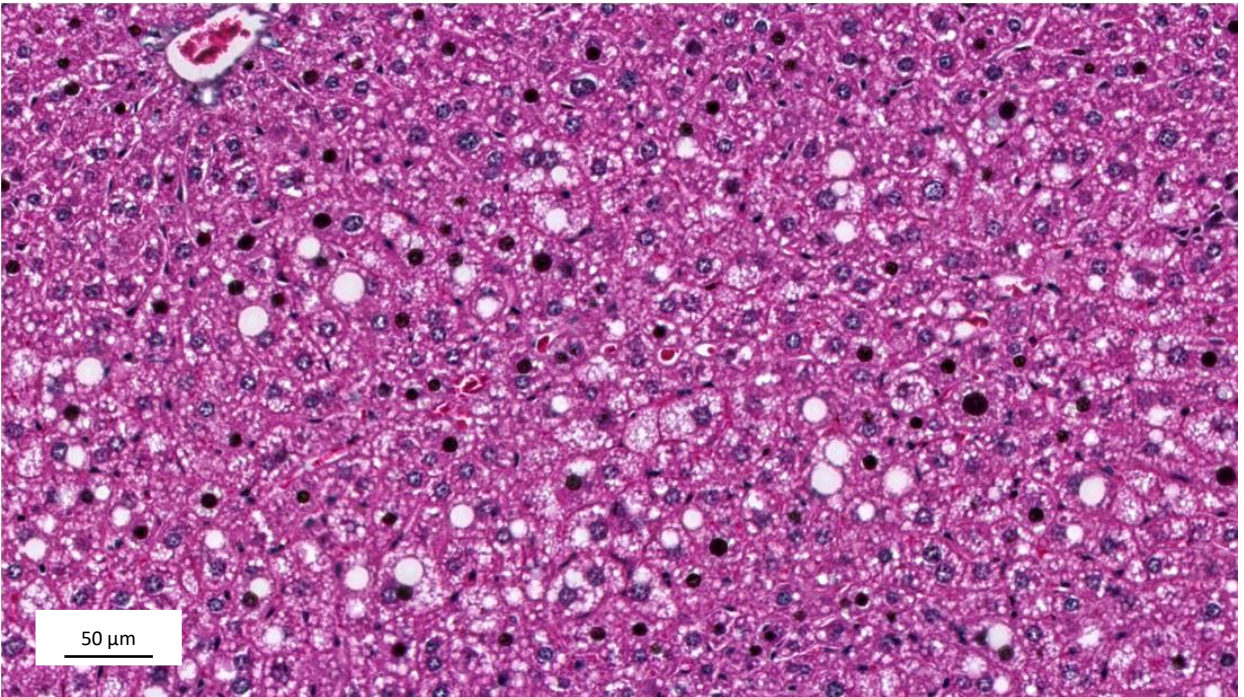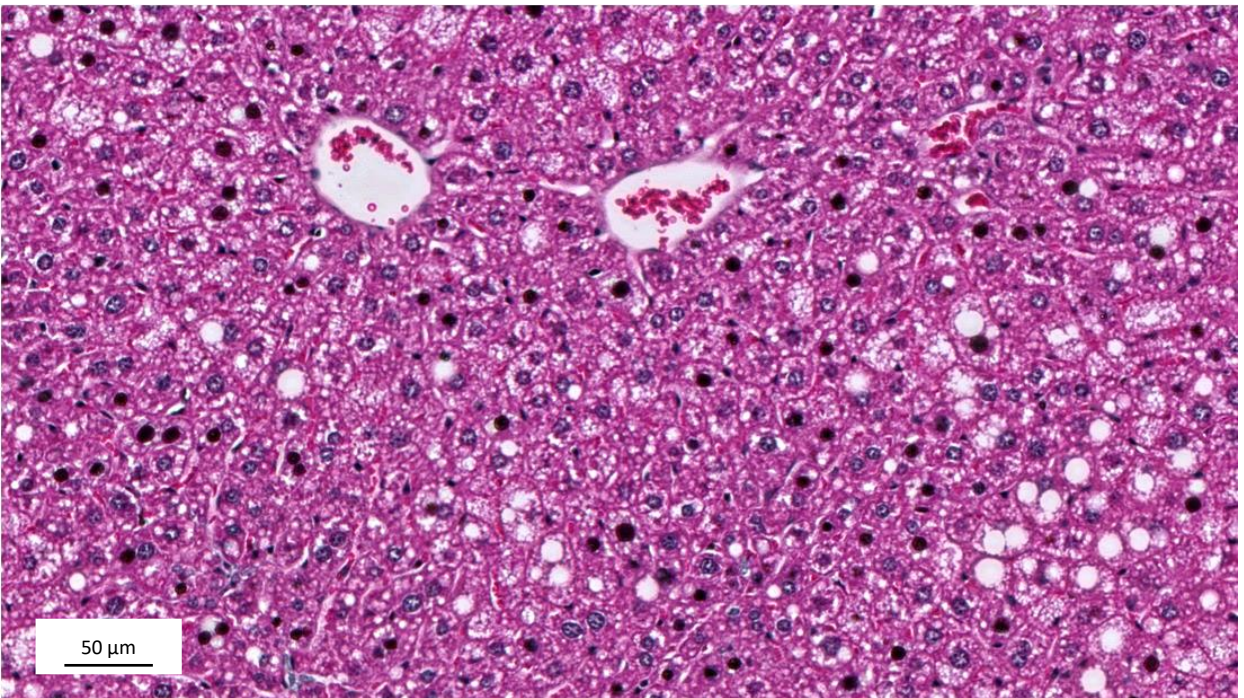



CDHFD-I-6

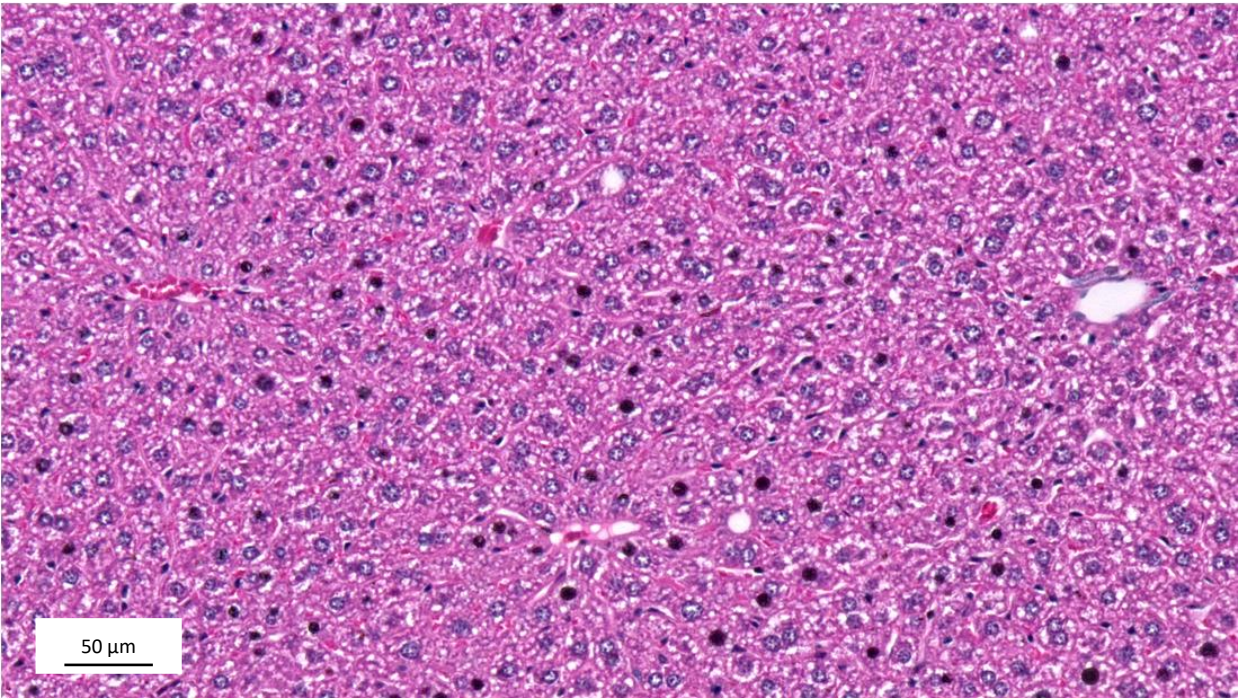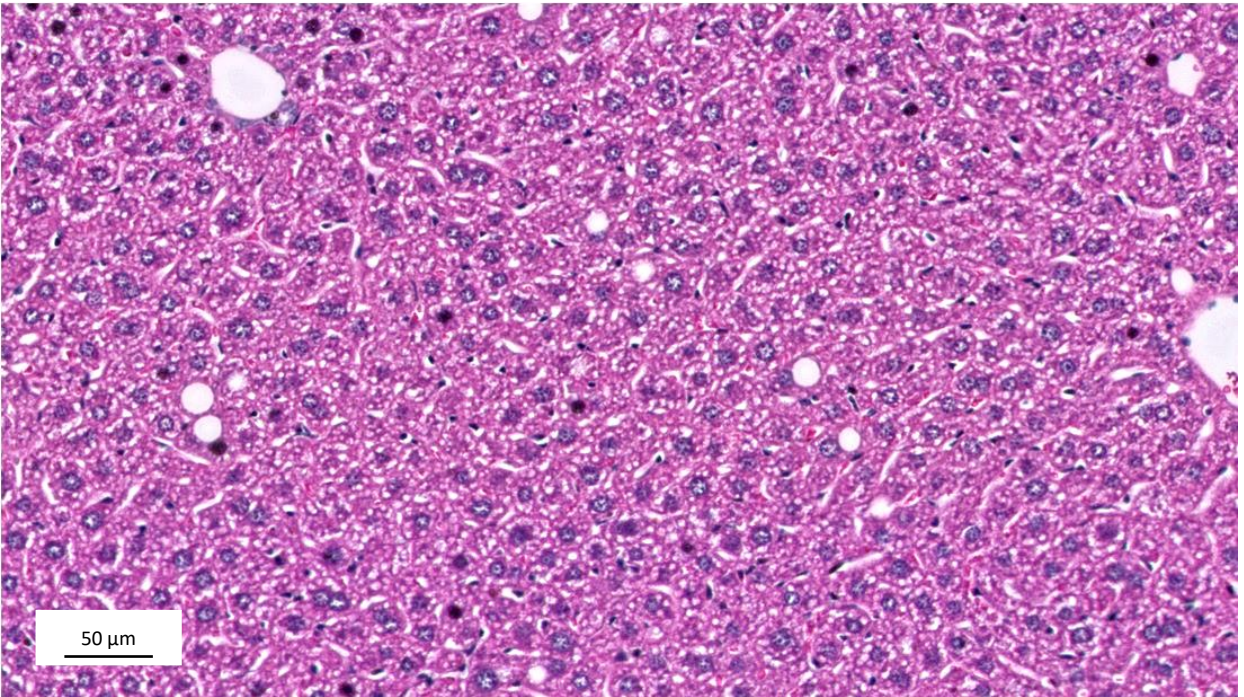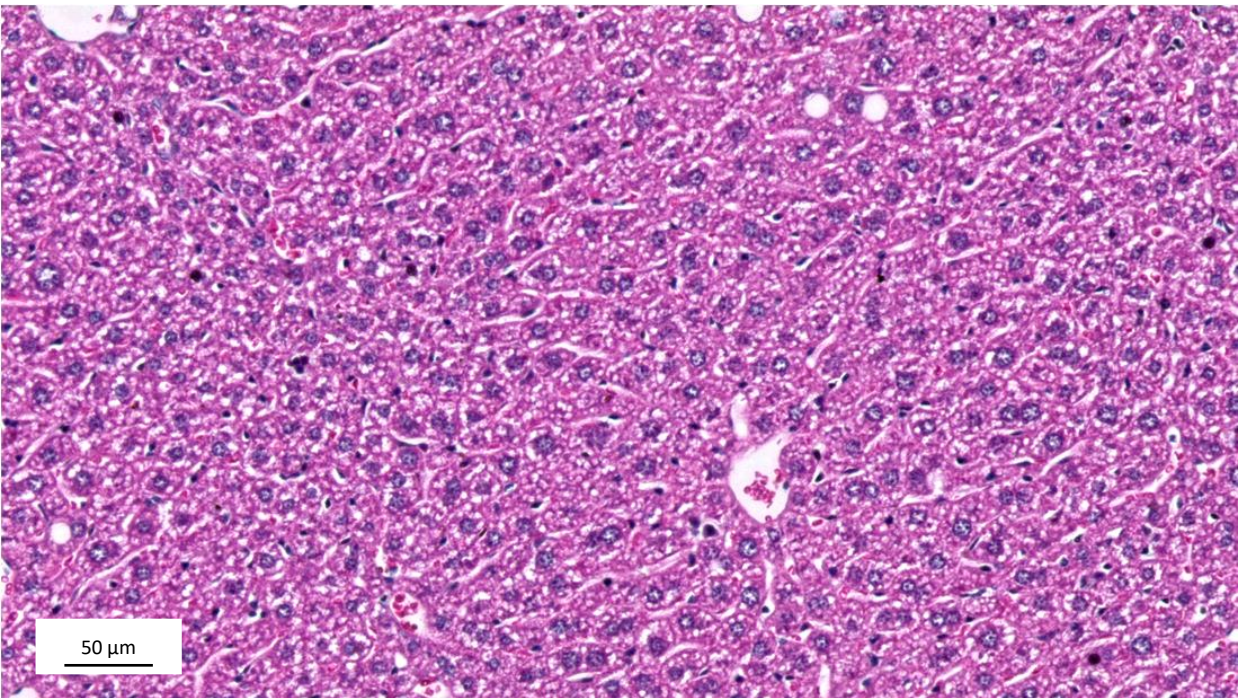

CDHFD-I-7

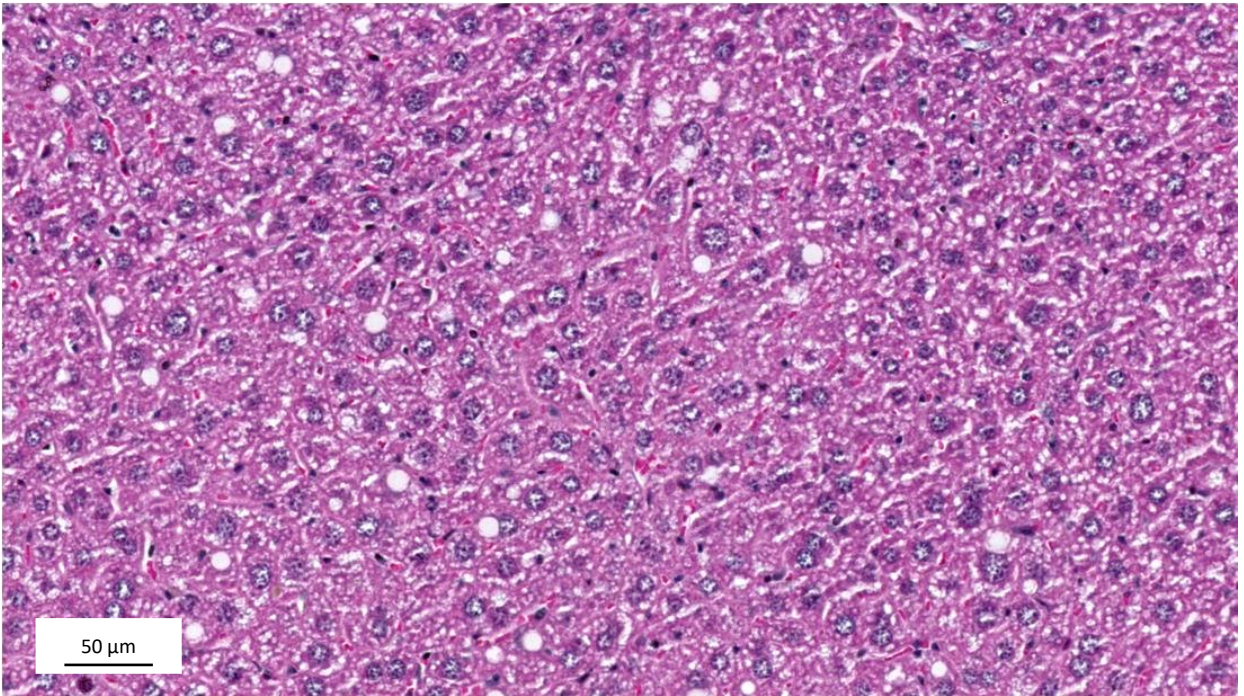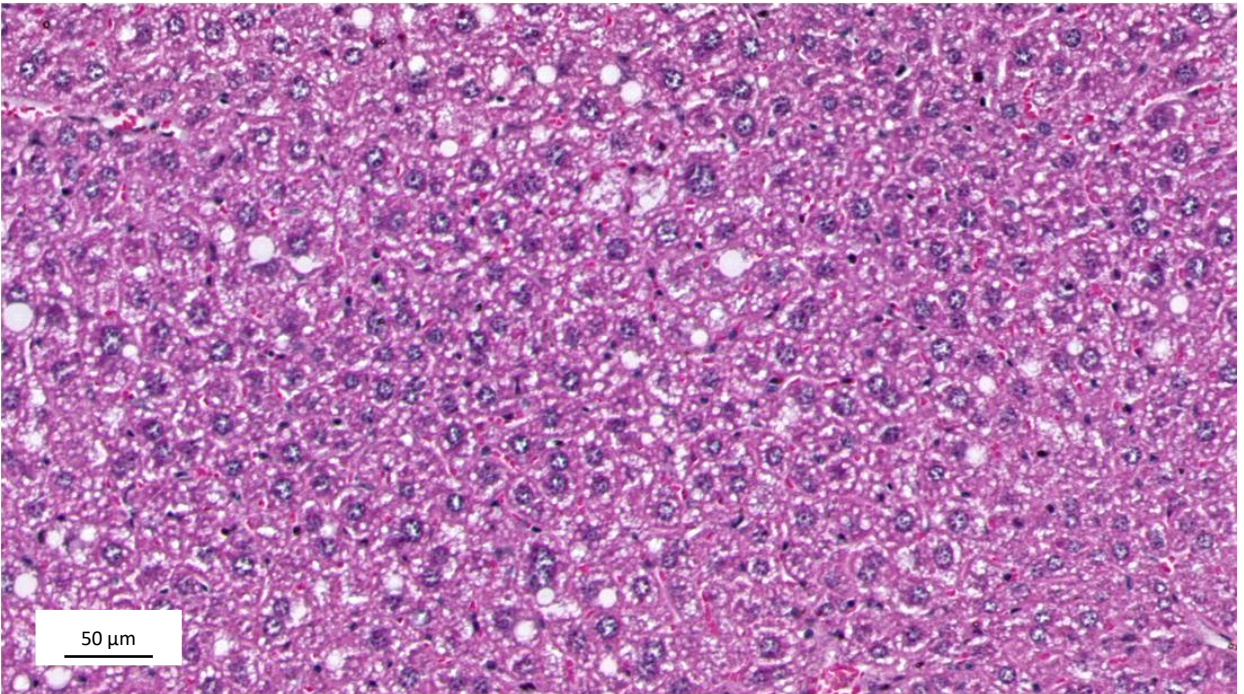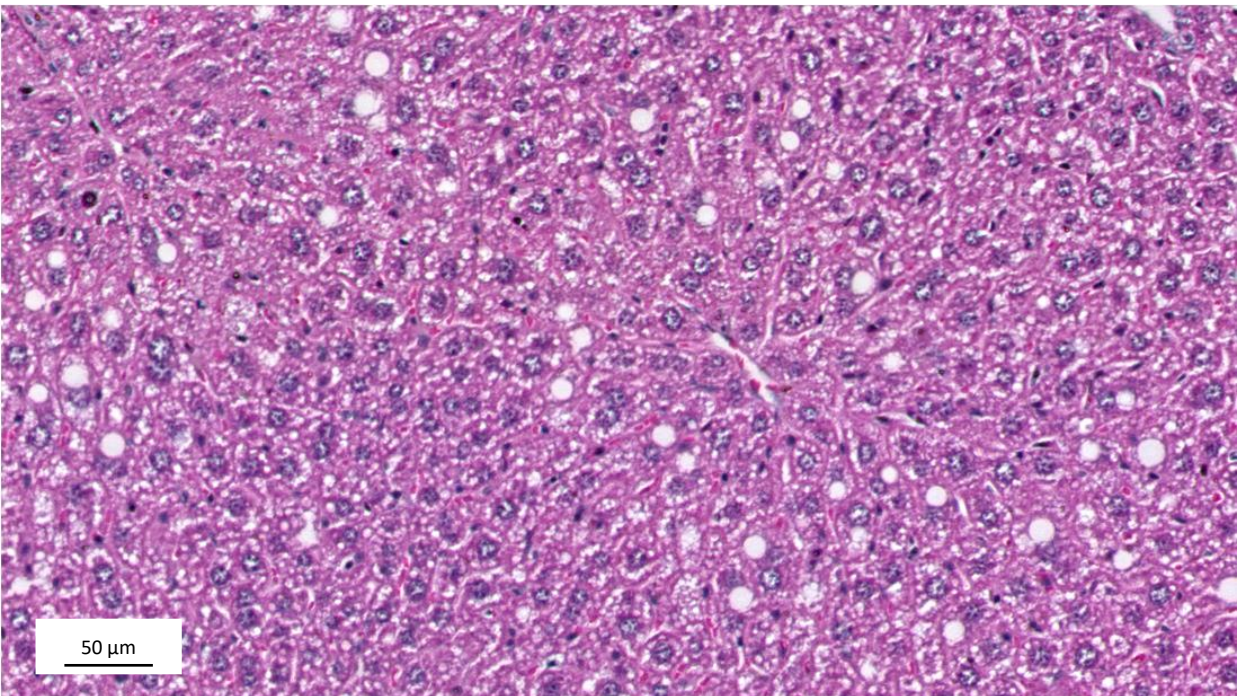

# CDHFD-I-8

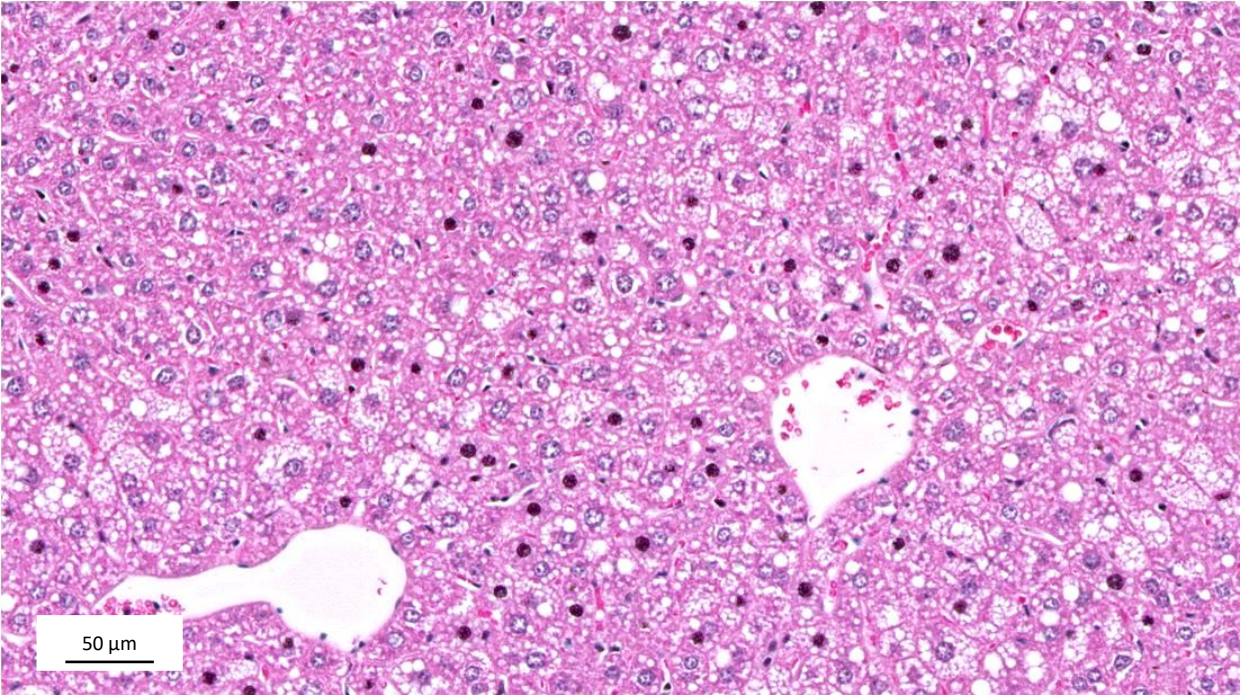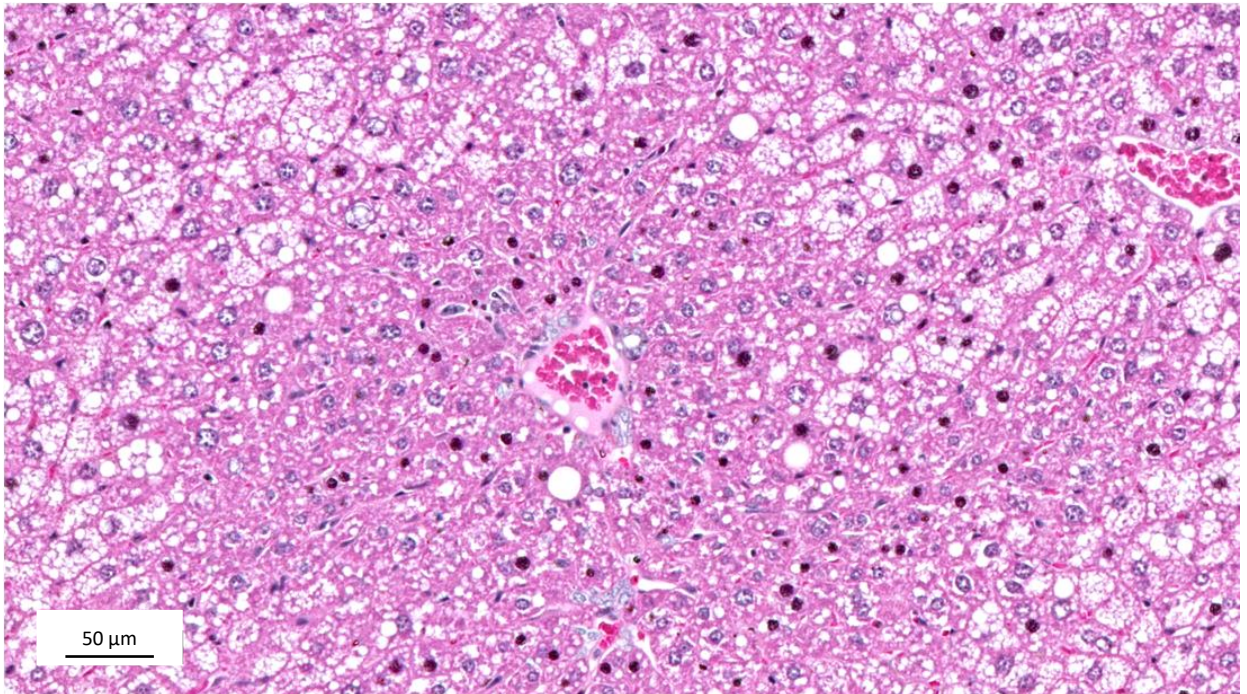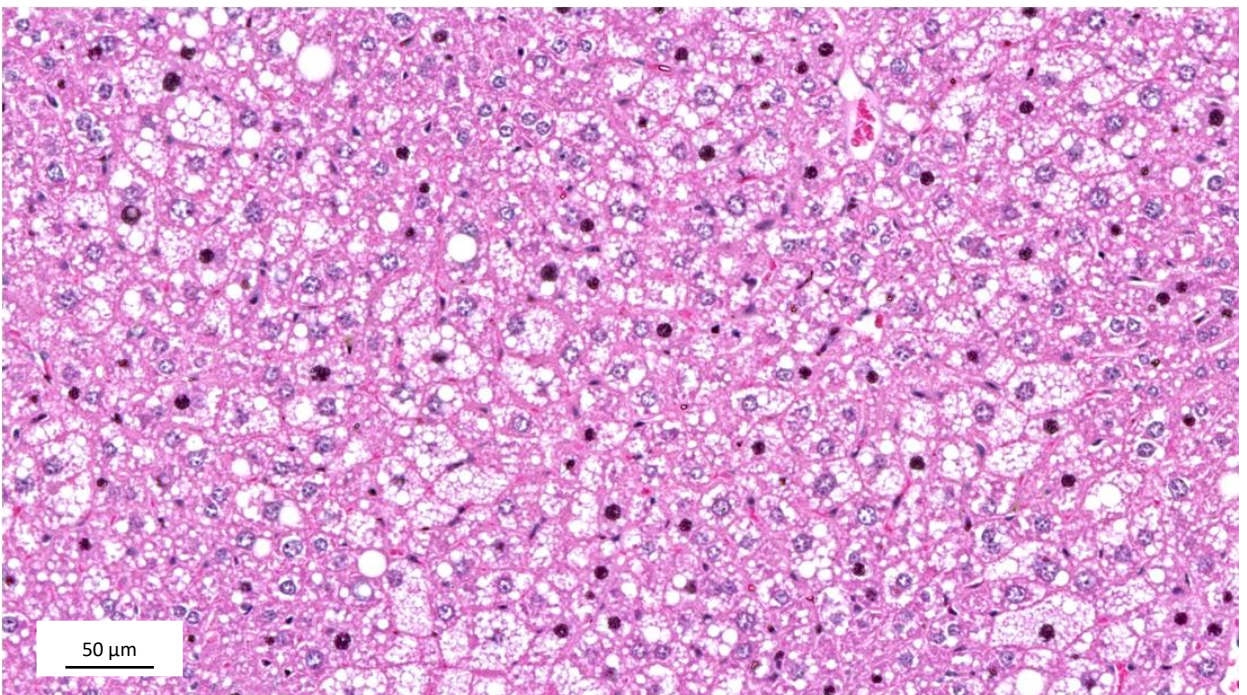

CDHFD-I-9

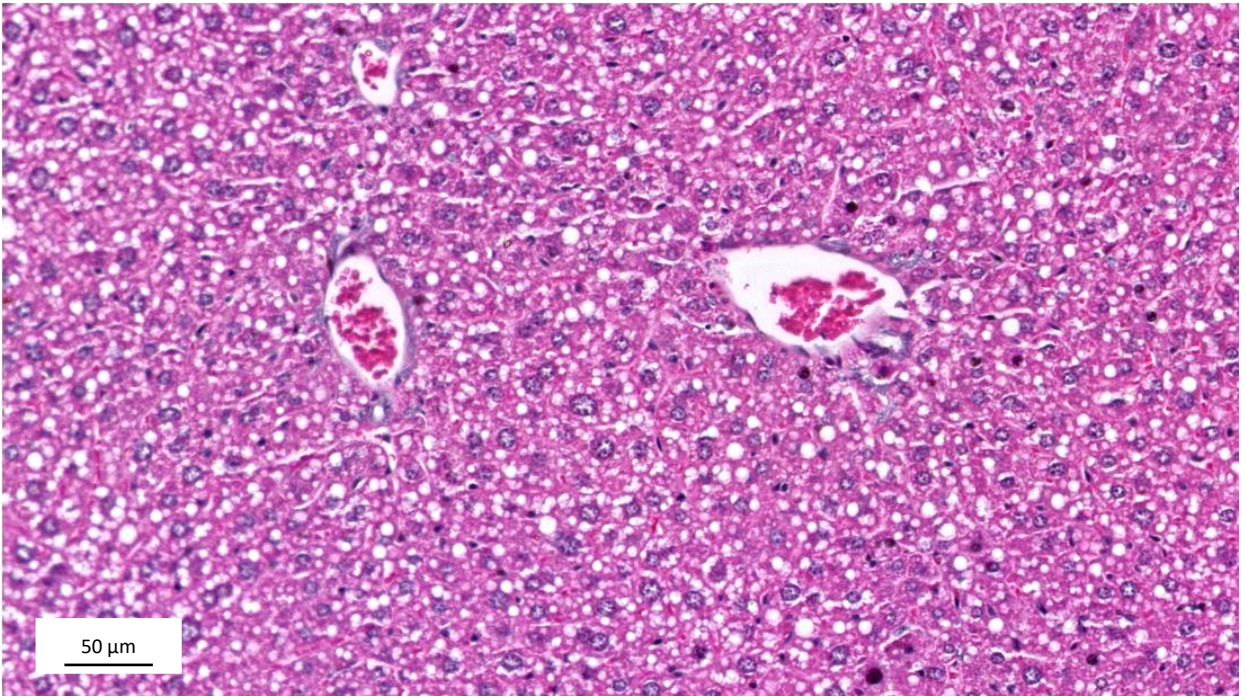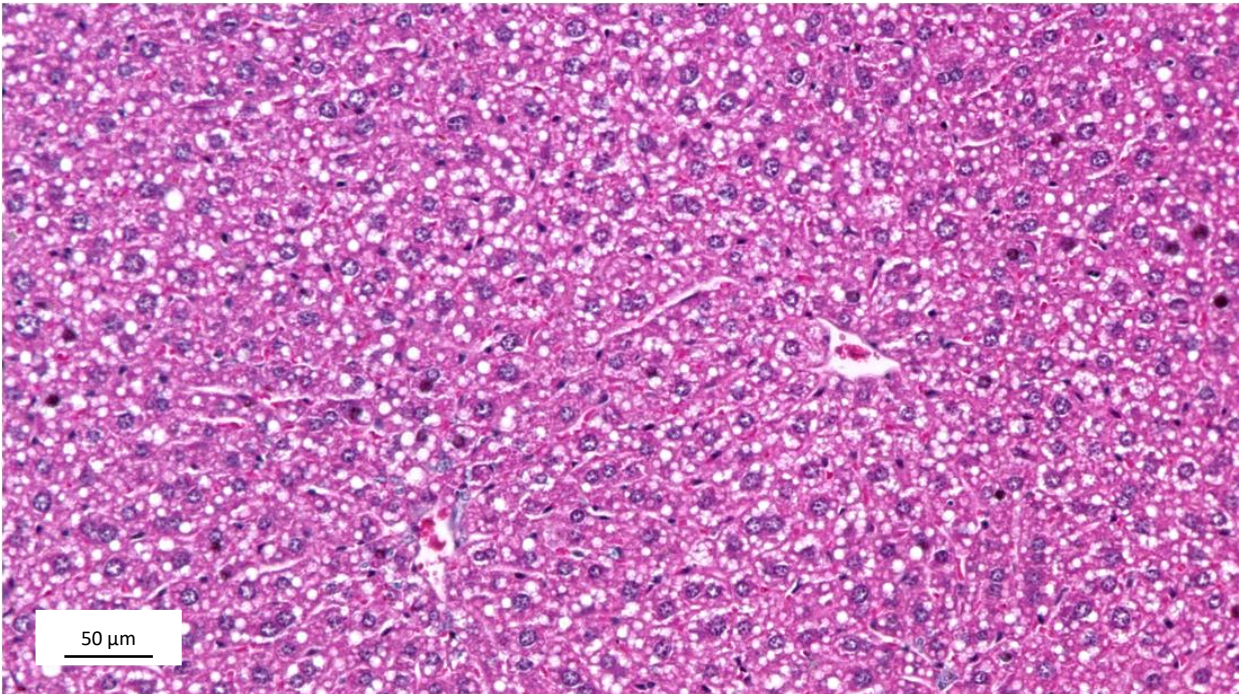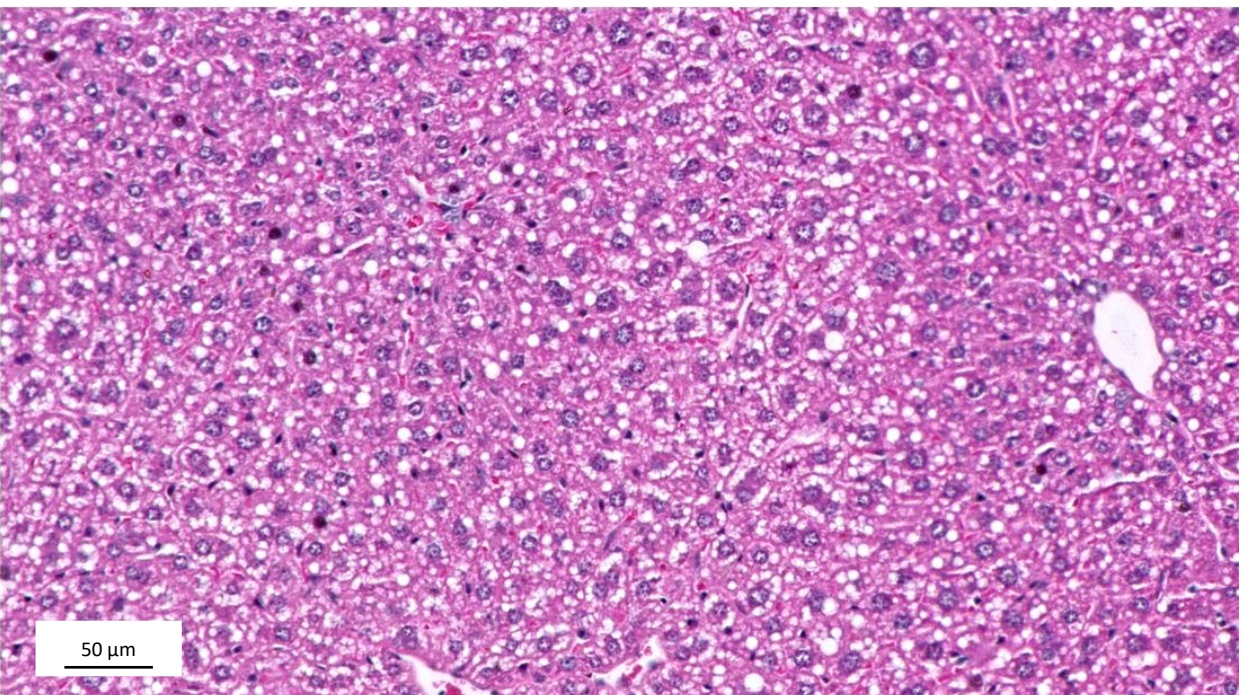

CDHFD-I-10

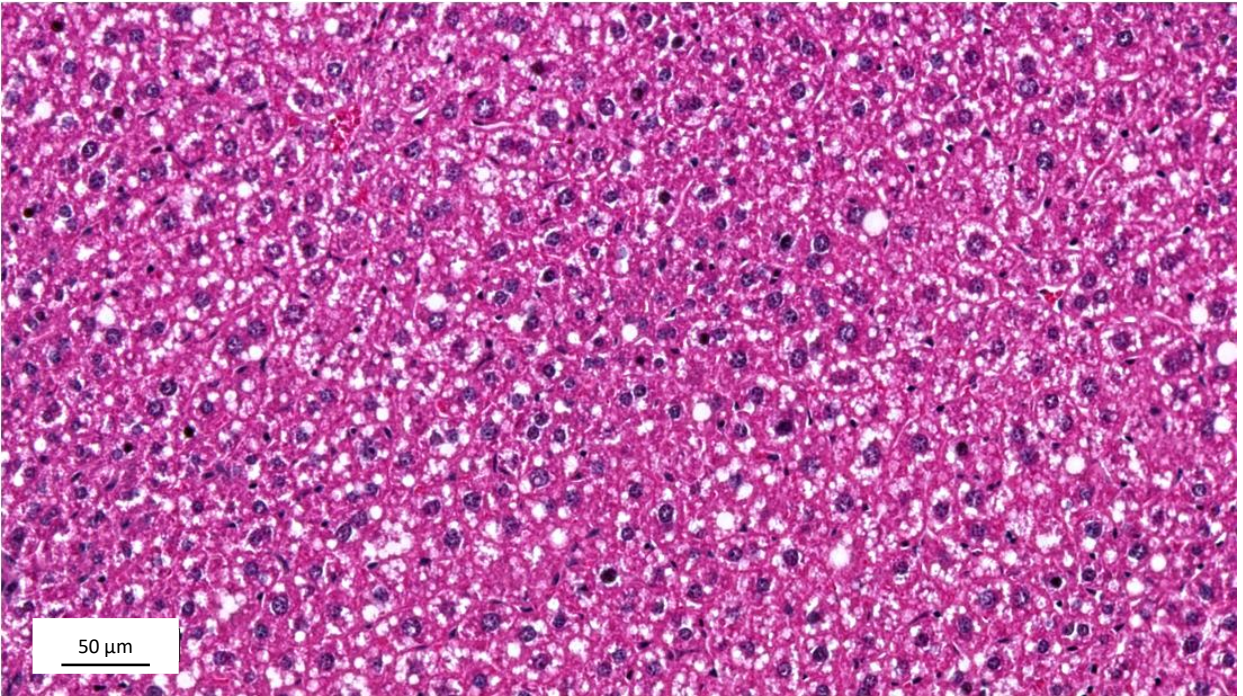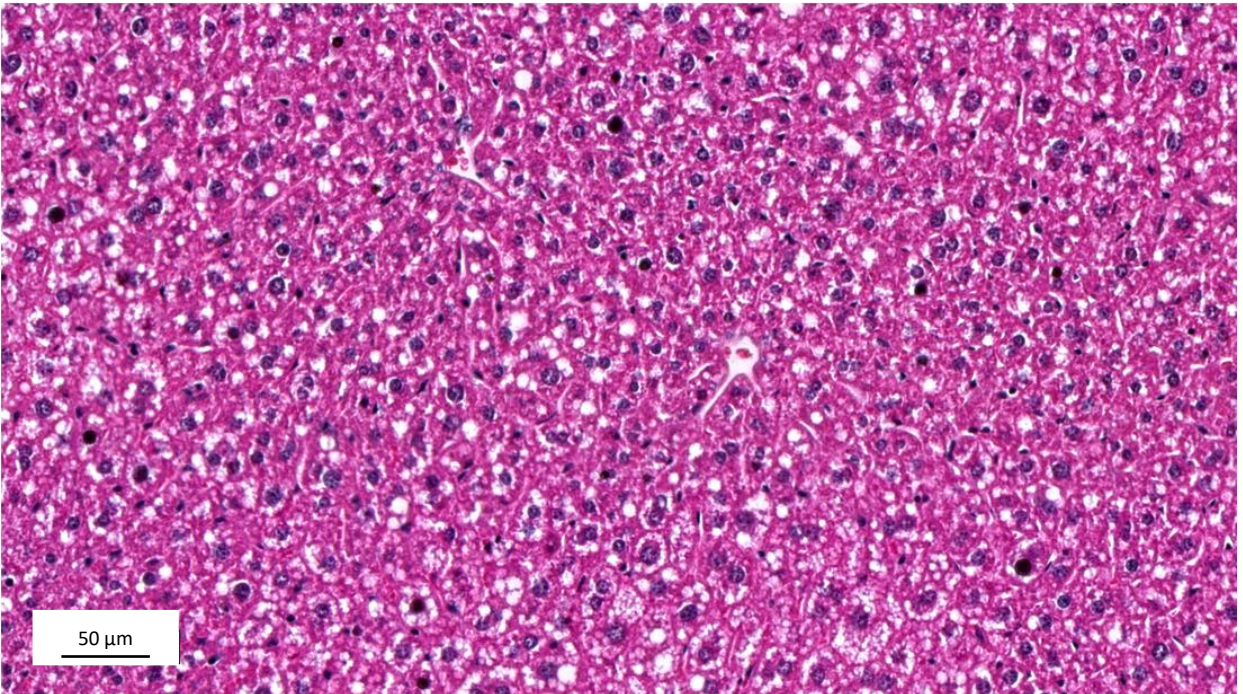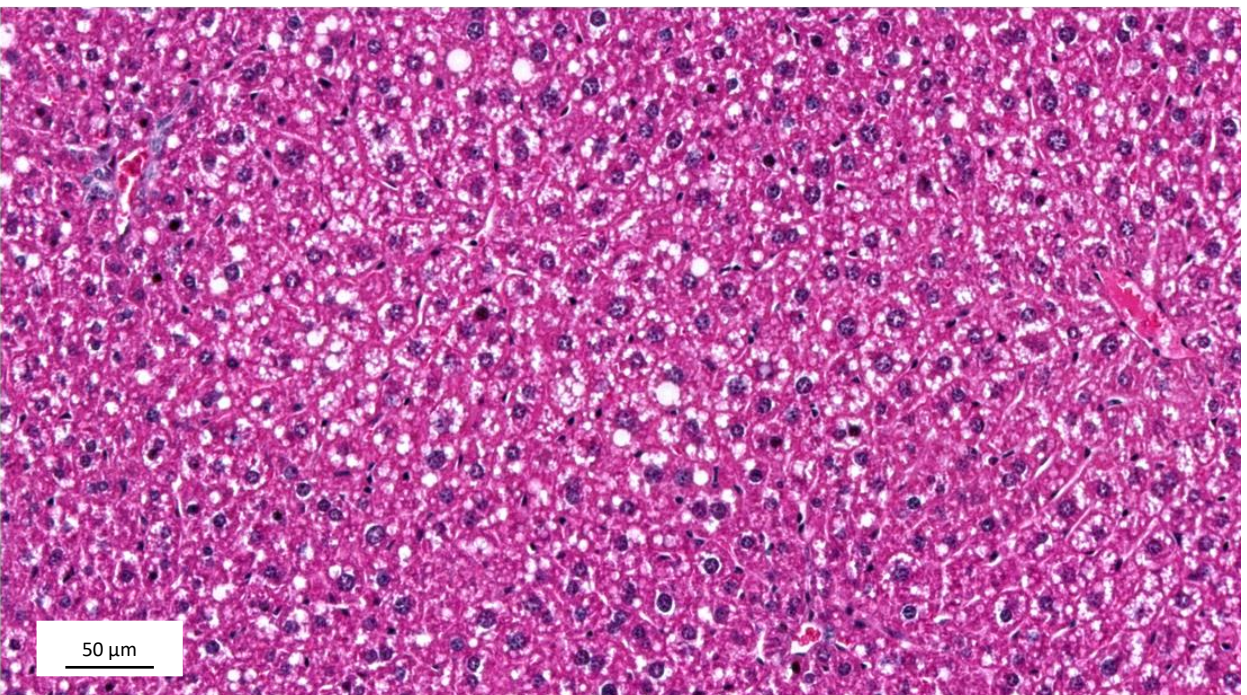

CDHFD-I-11

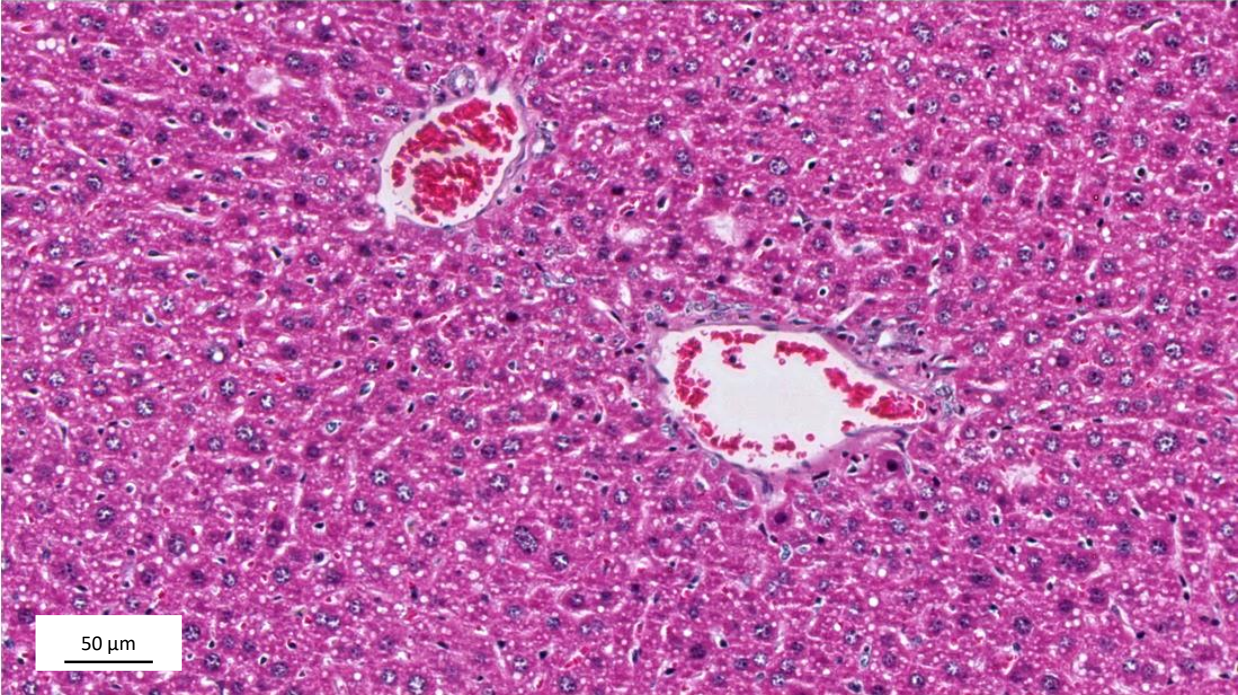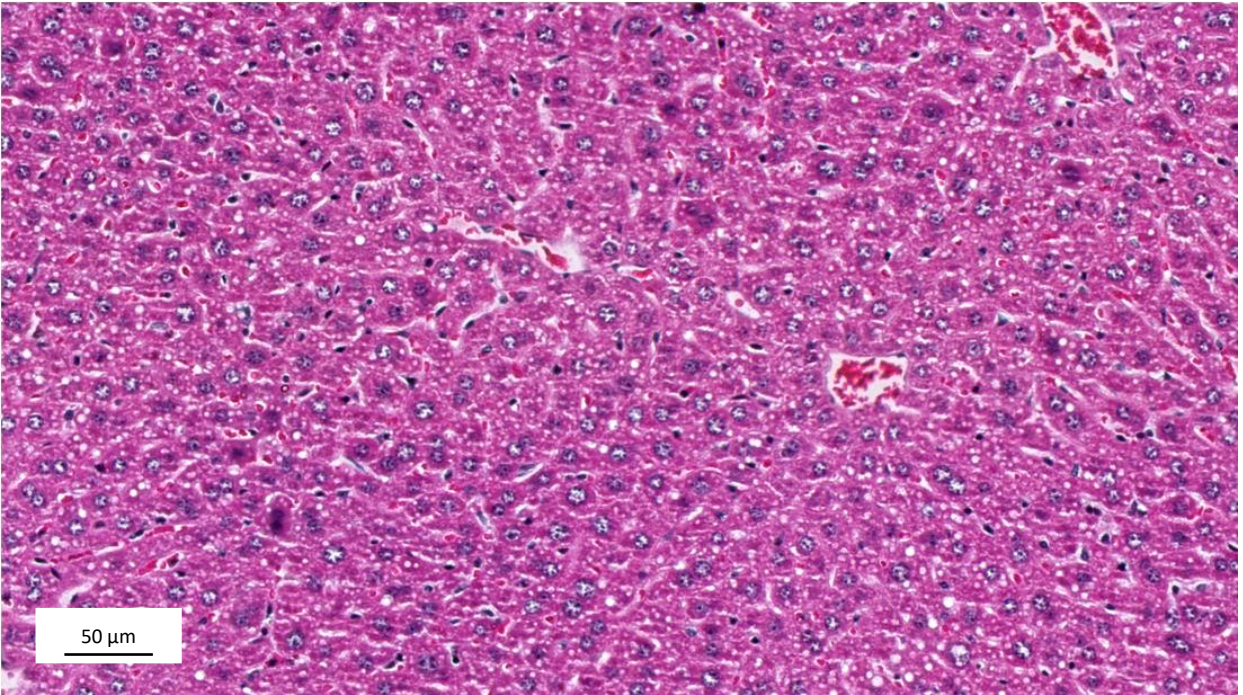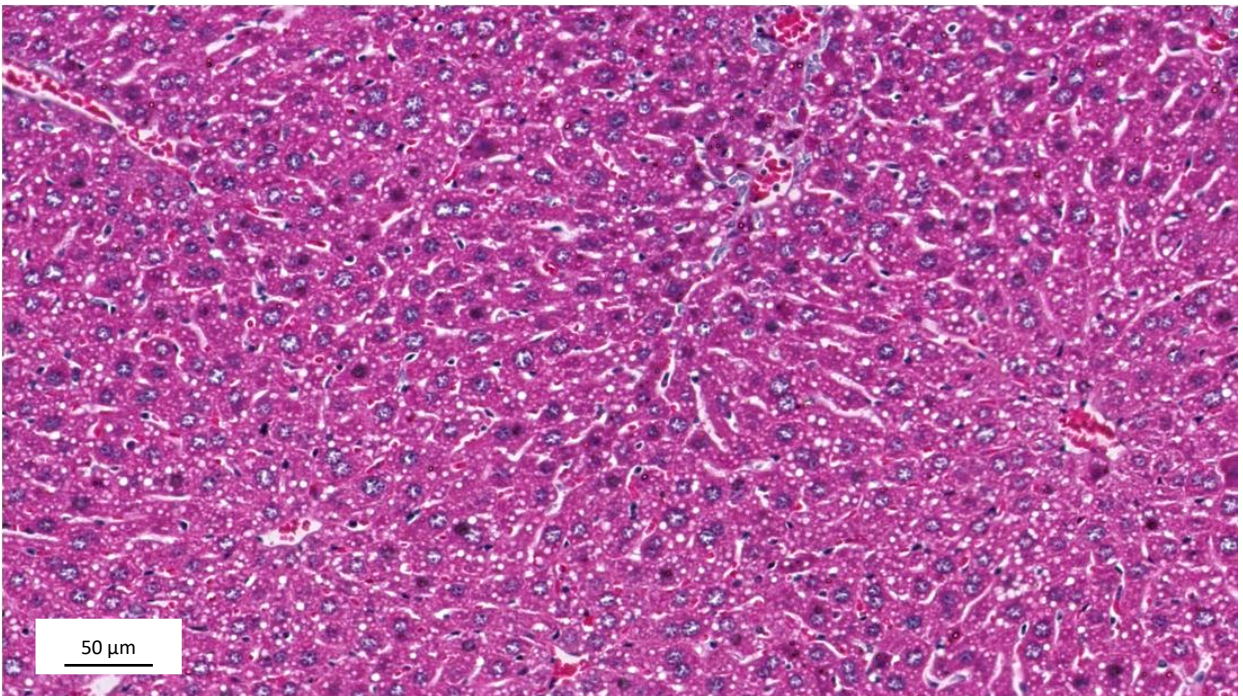

CDHFD-I-12

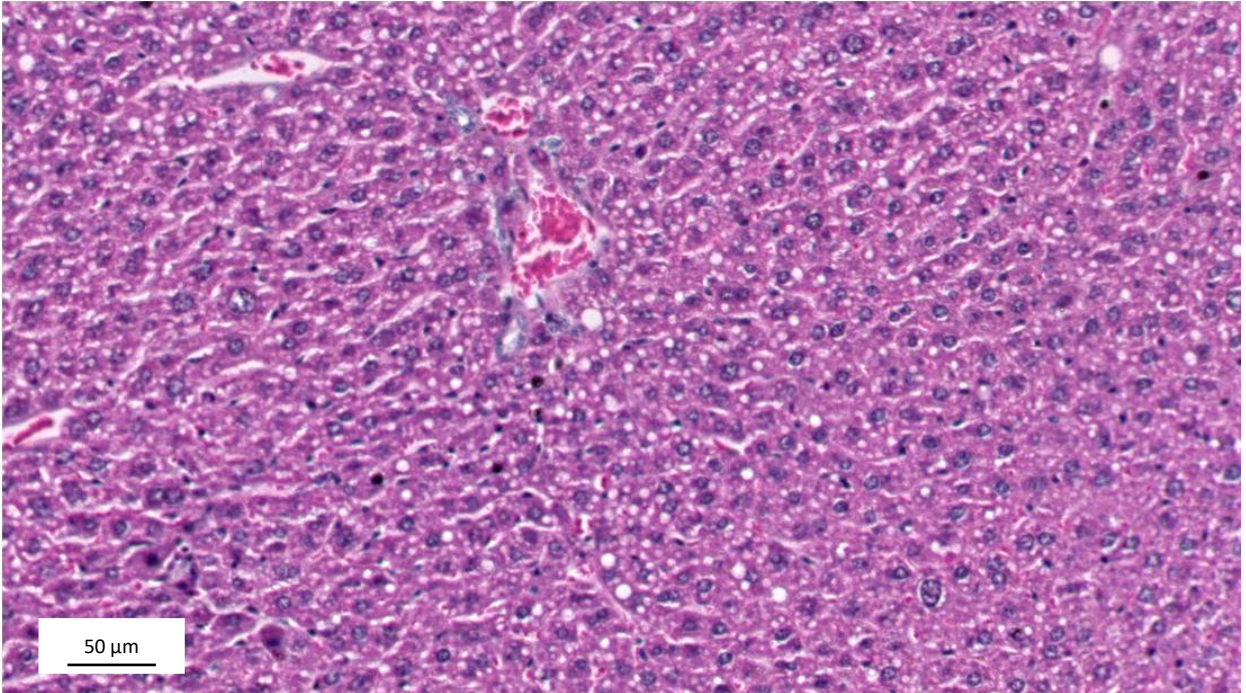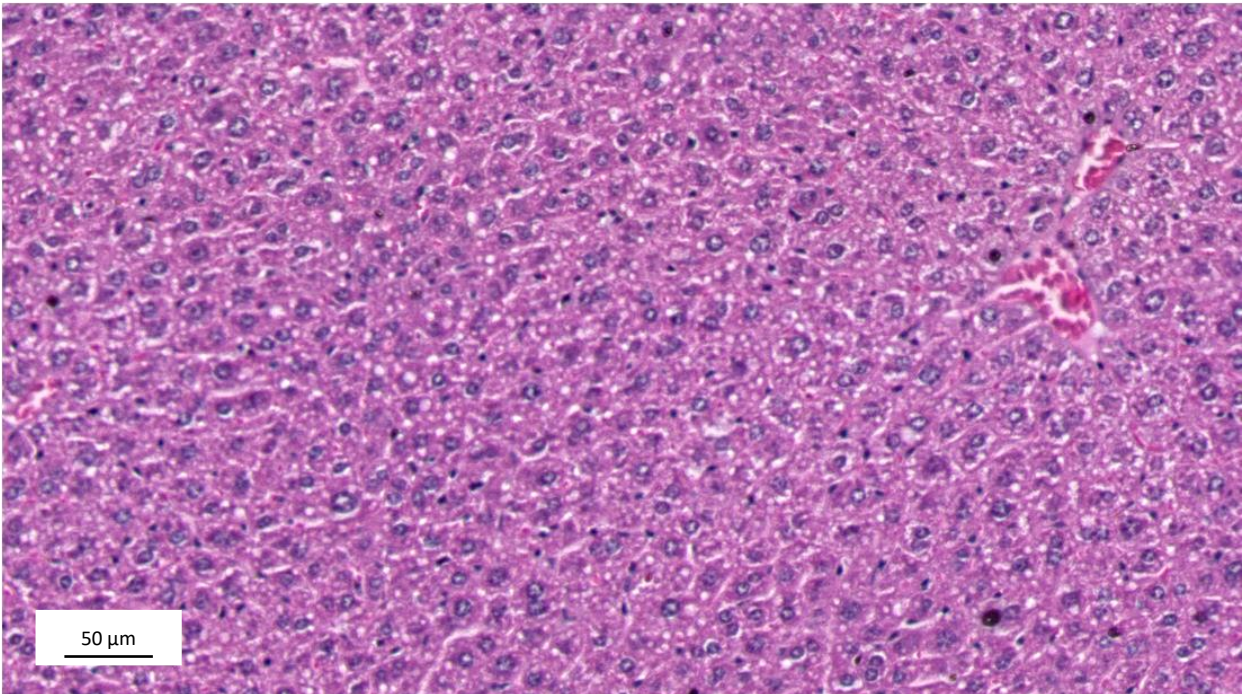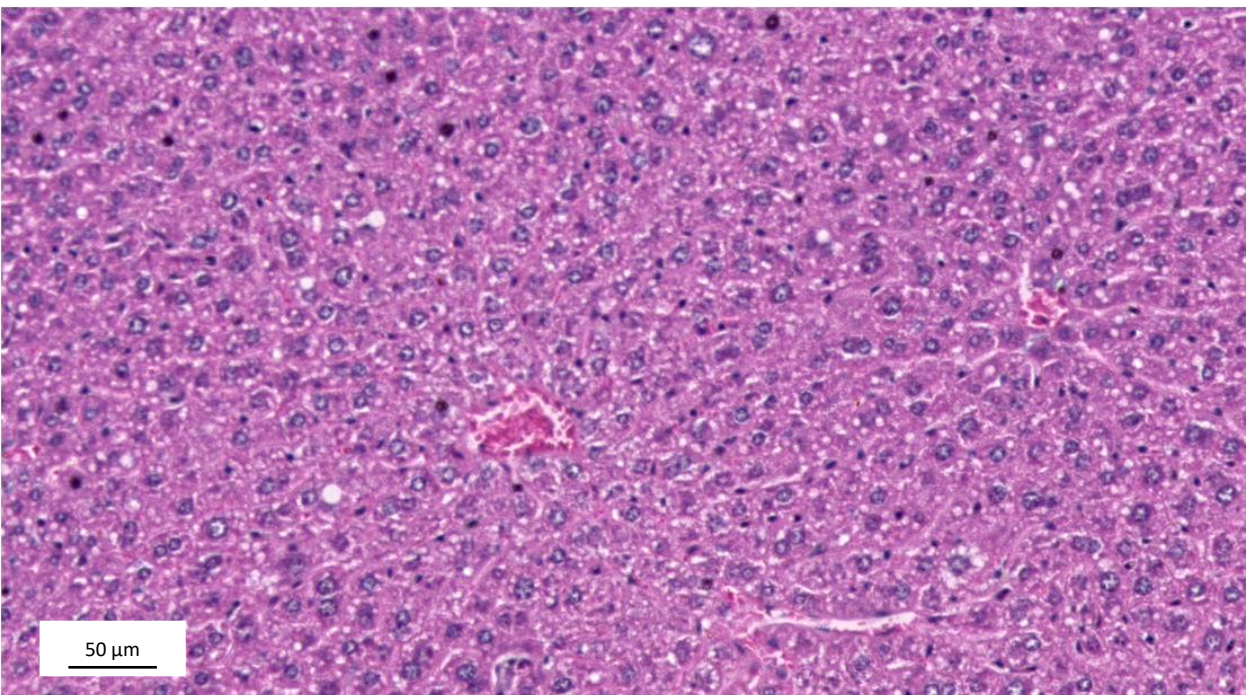

CDHFD-I-13

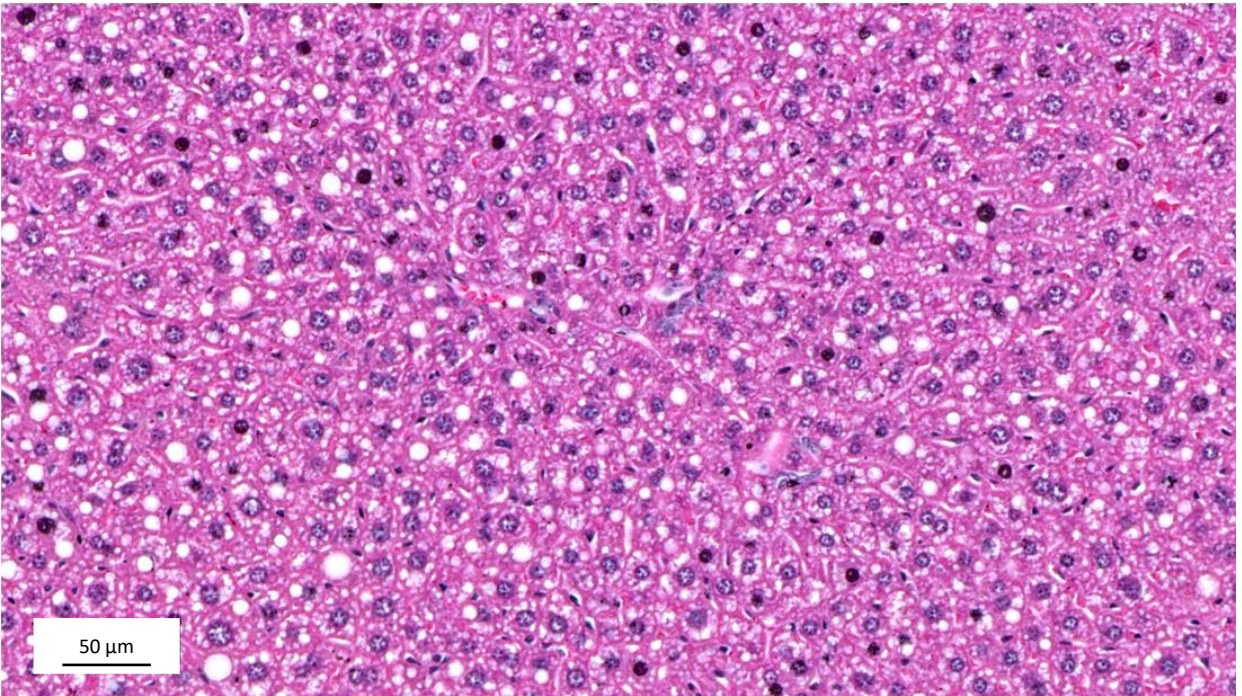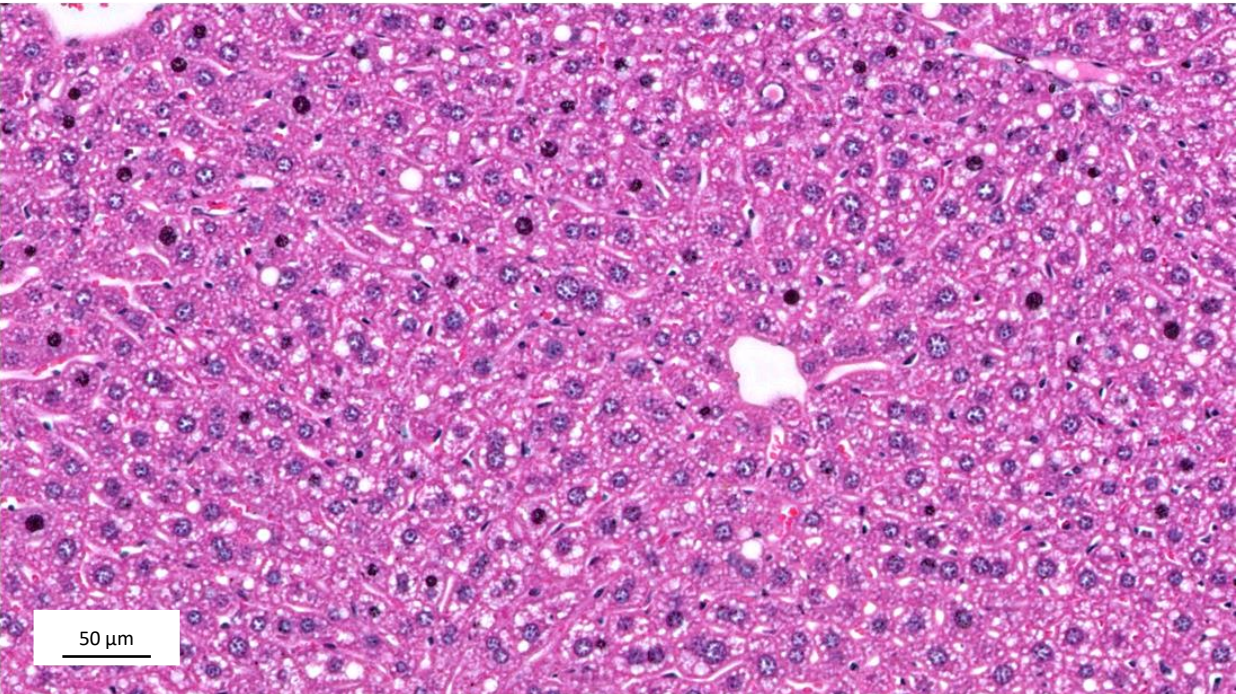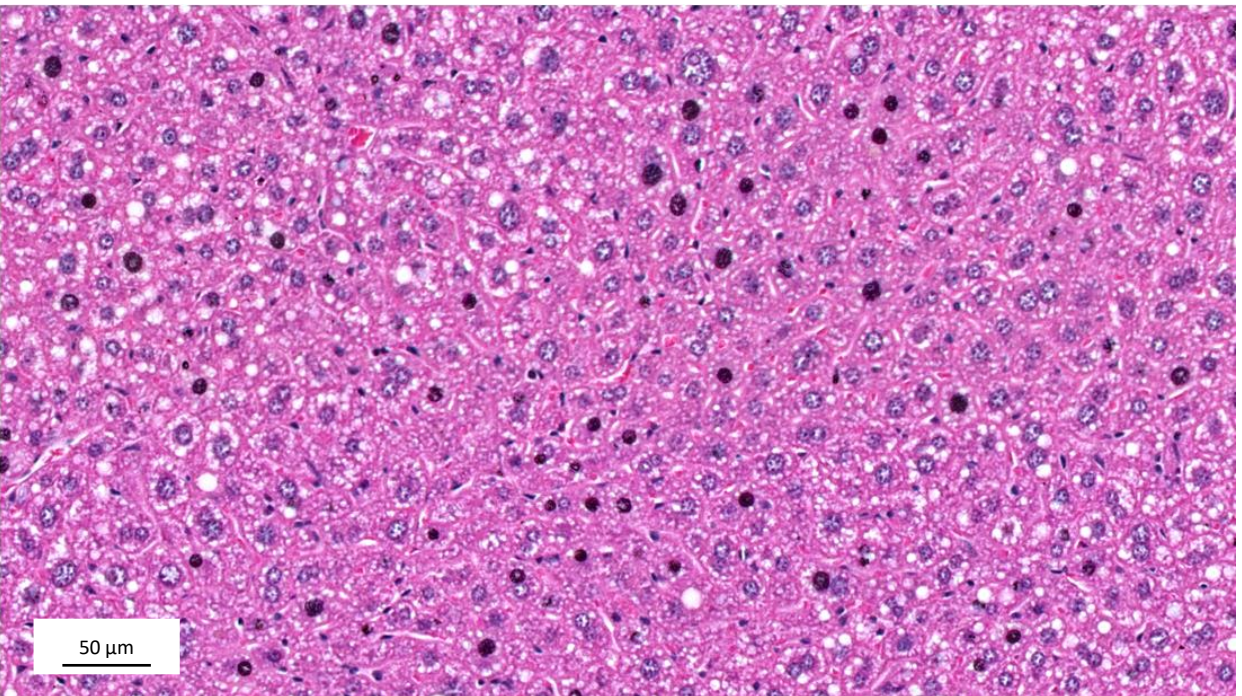



CDHFD-I-14

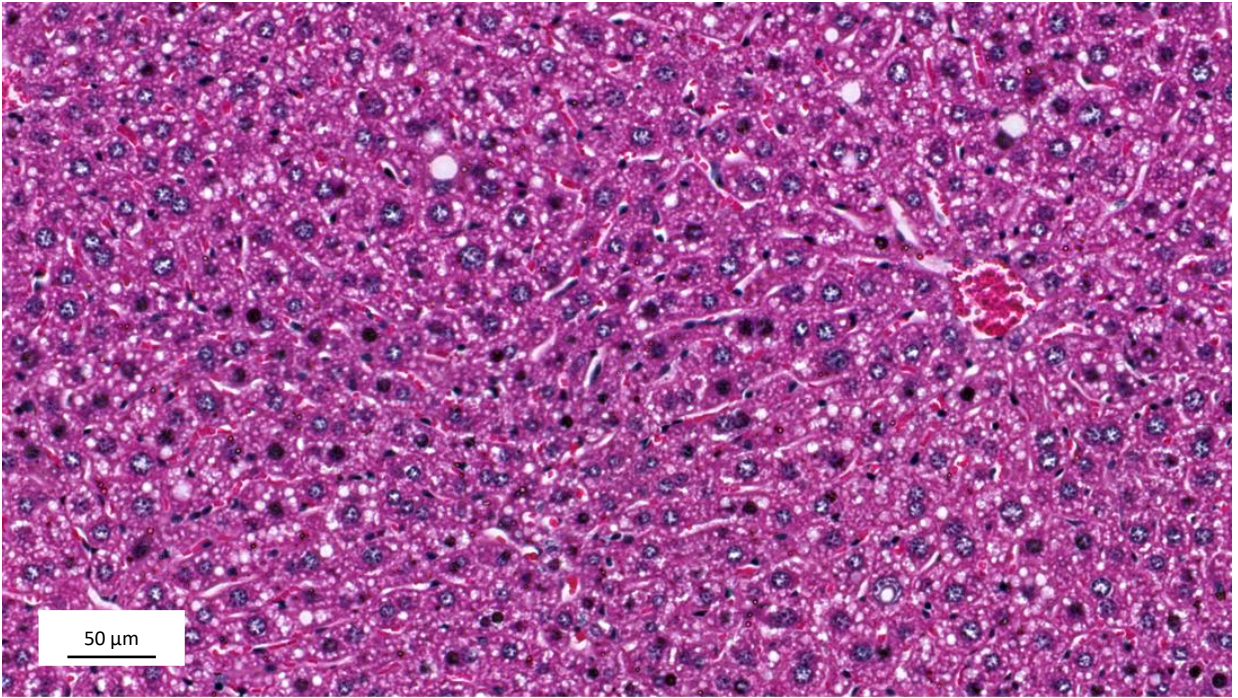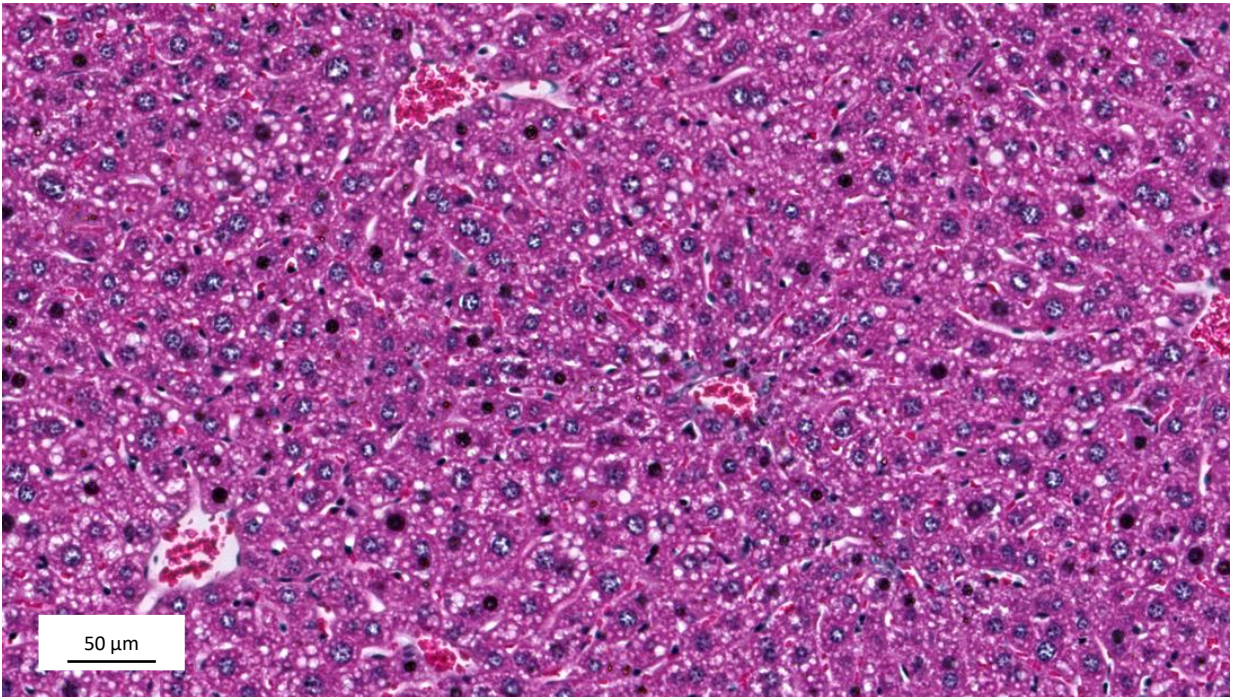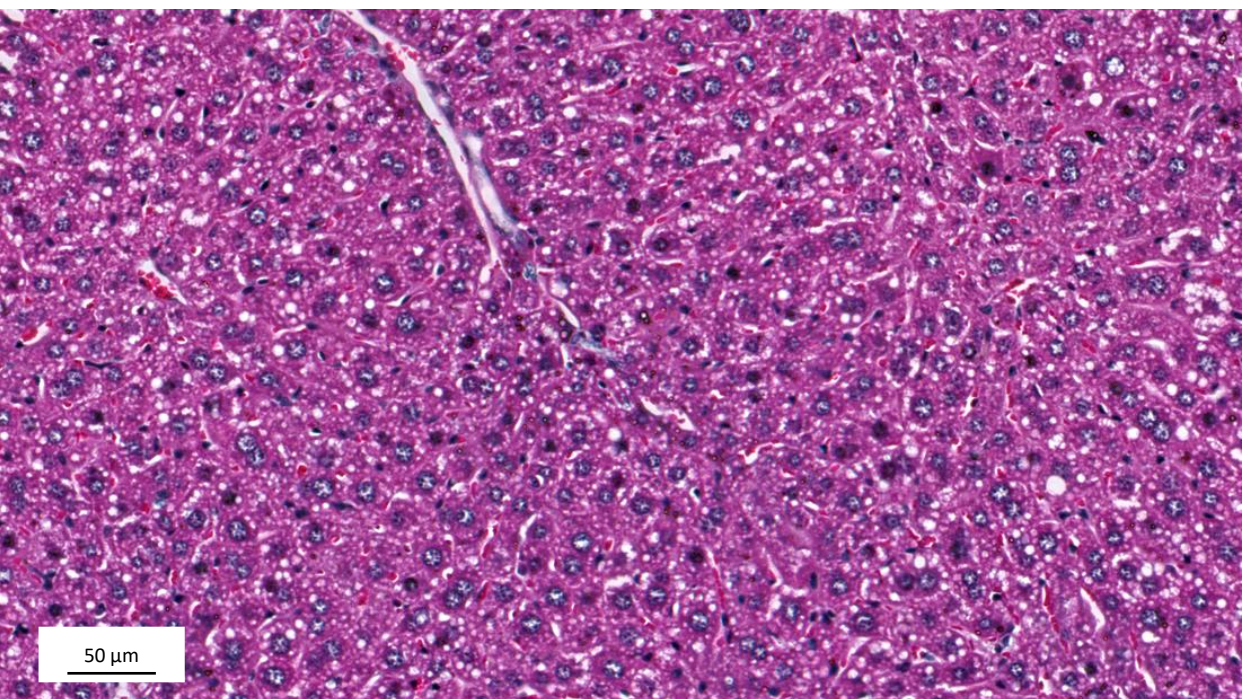

CDHFD-I-15

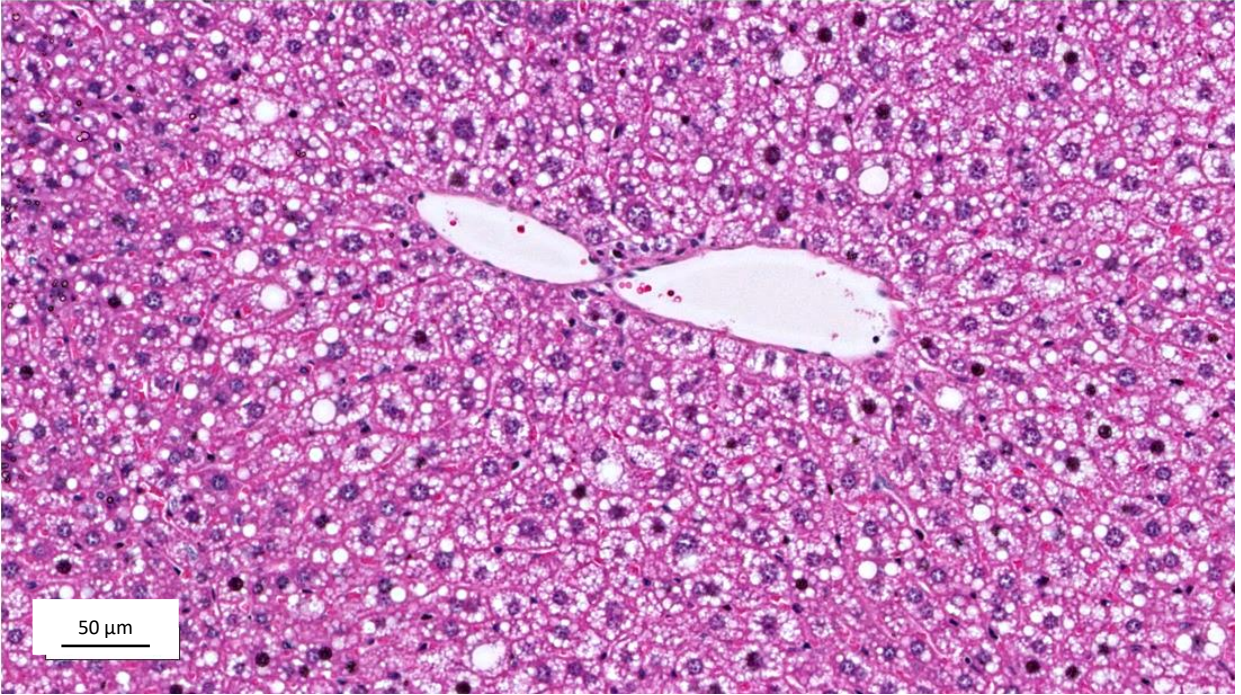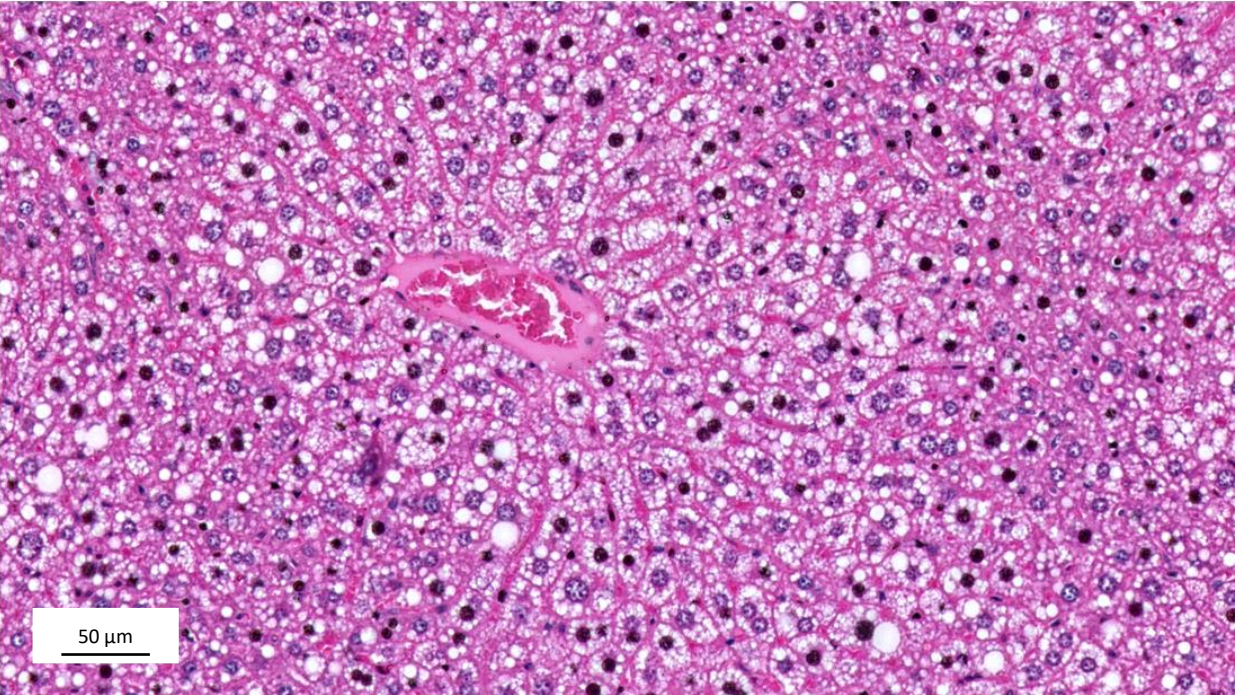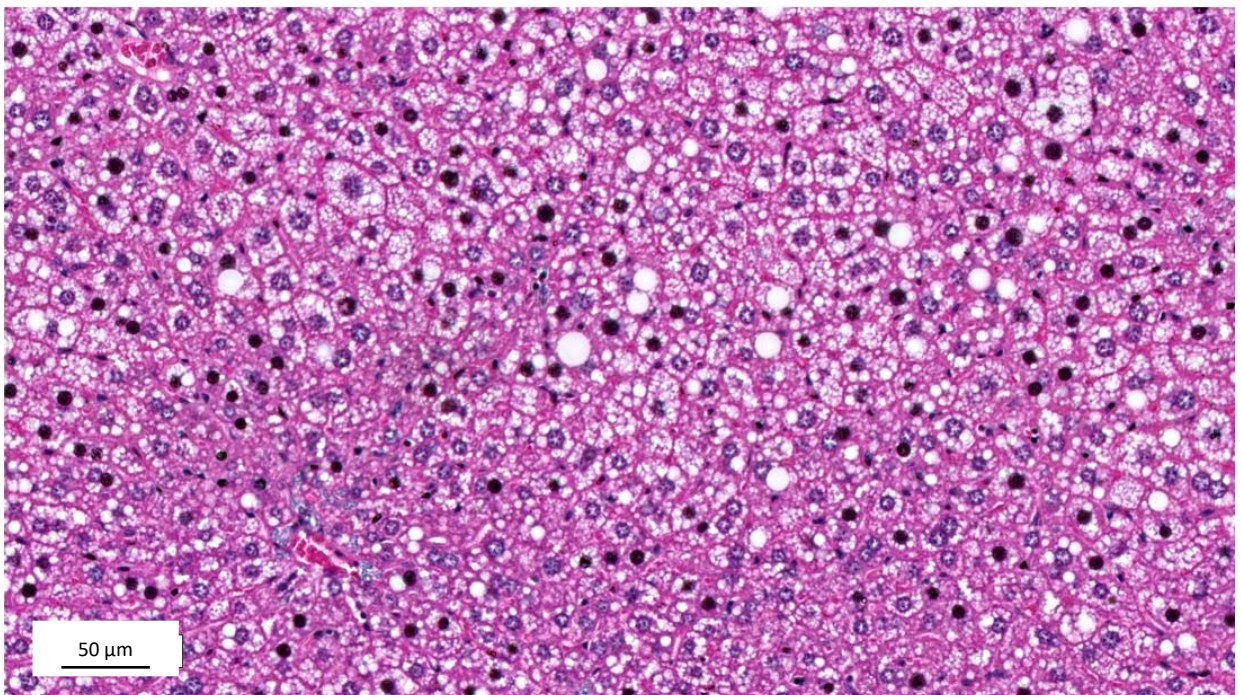

**H&E Staining**

**CDHFD-C group**

(15 mice were included)

# CDHFD-C-1

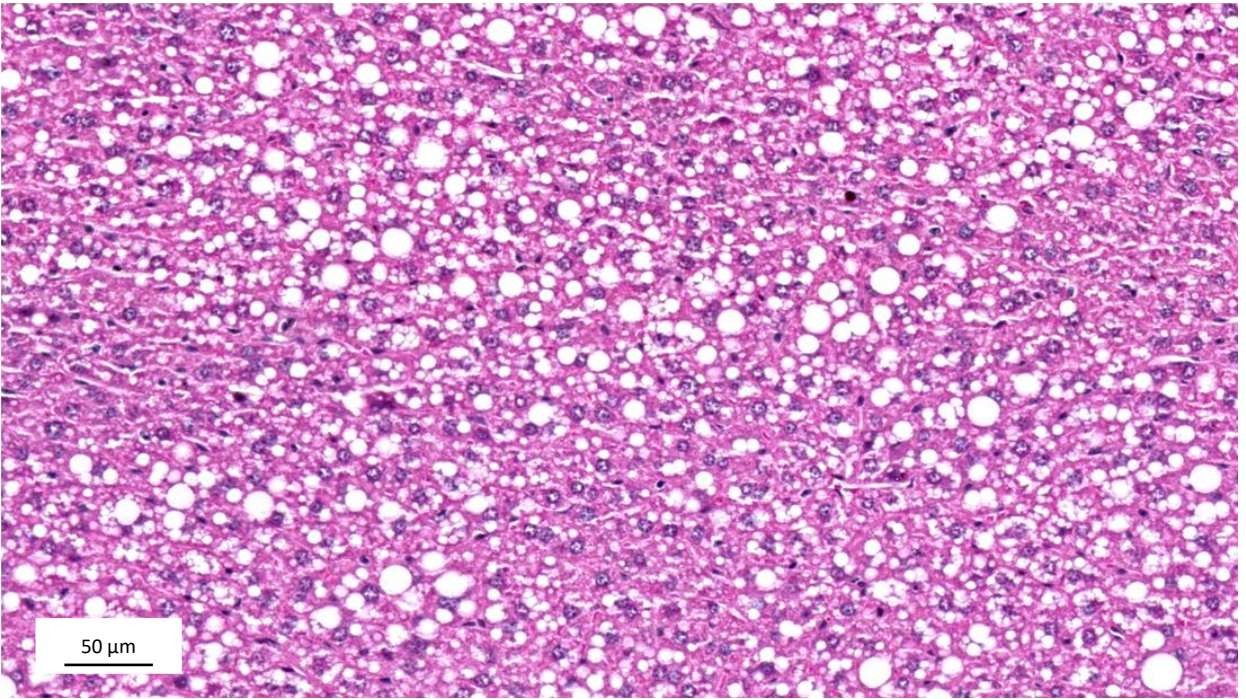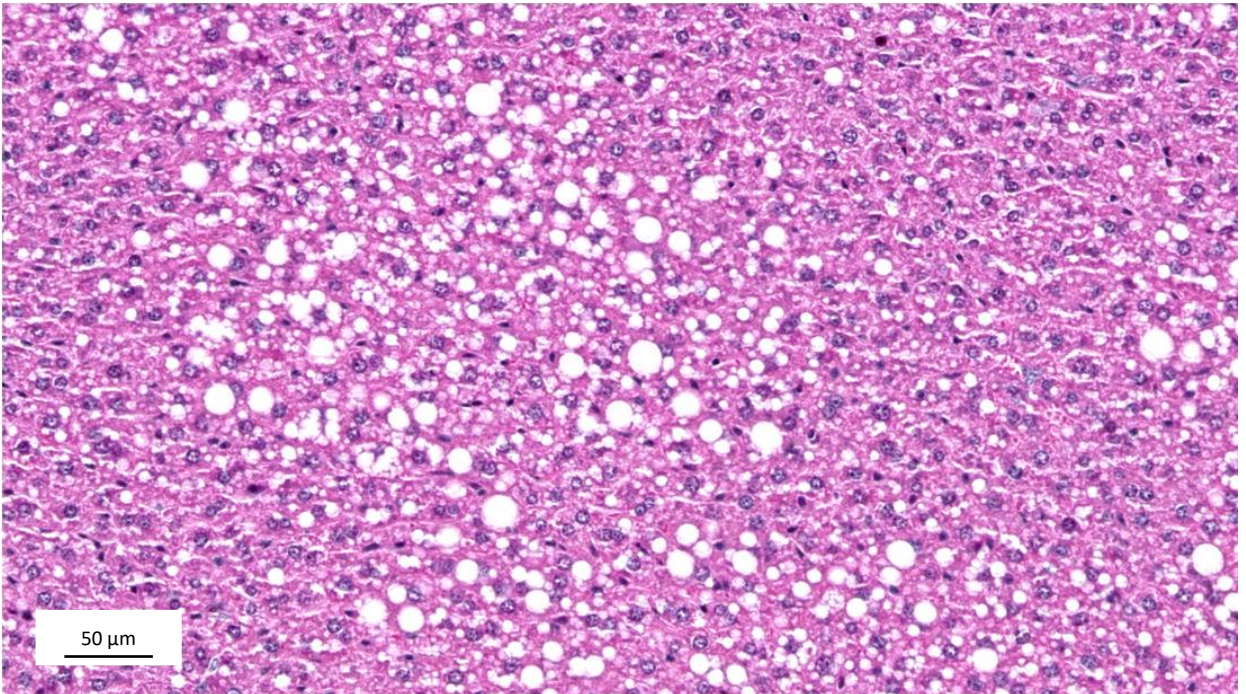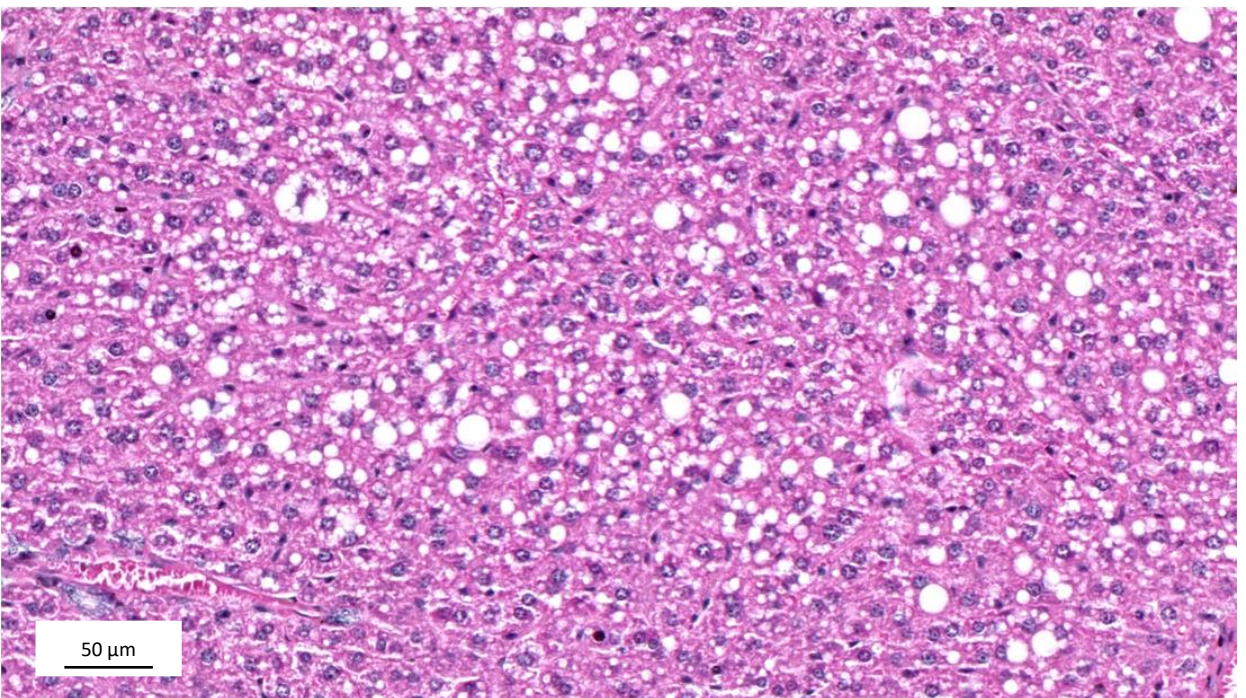

CDHFD-C-2

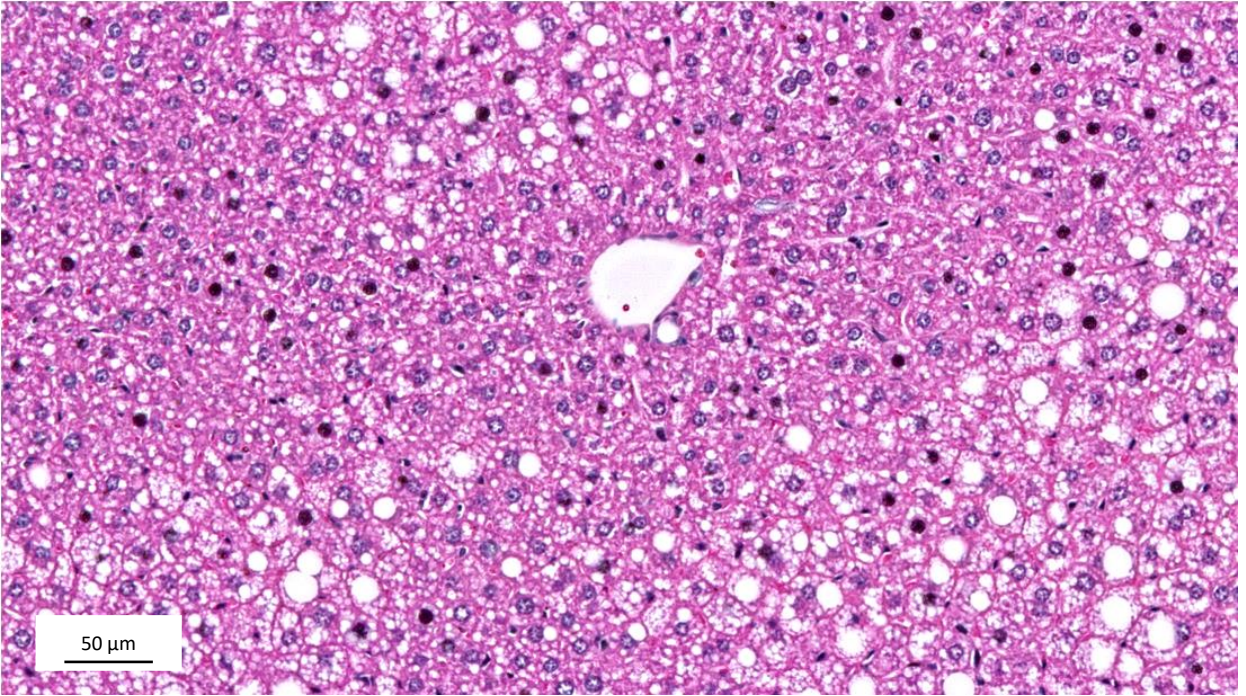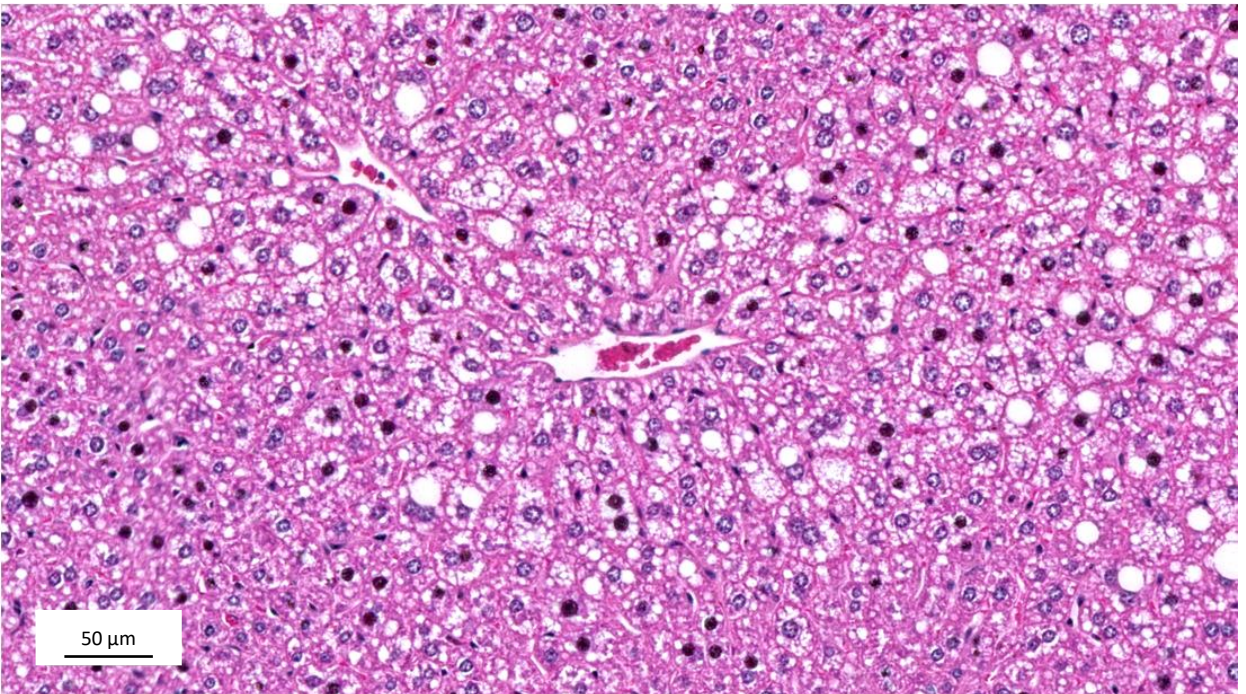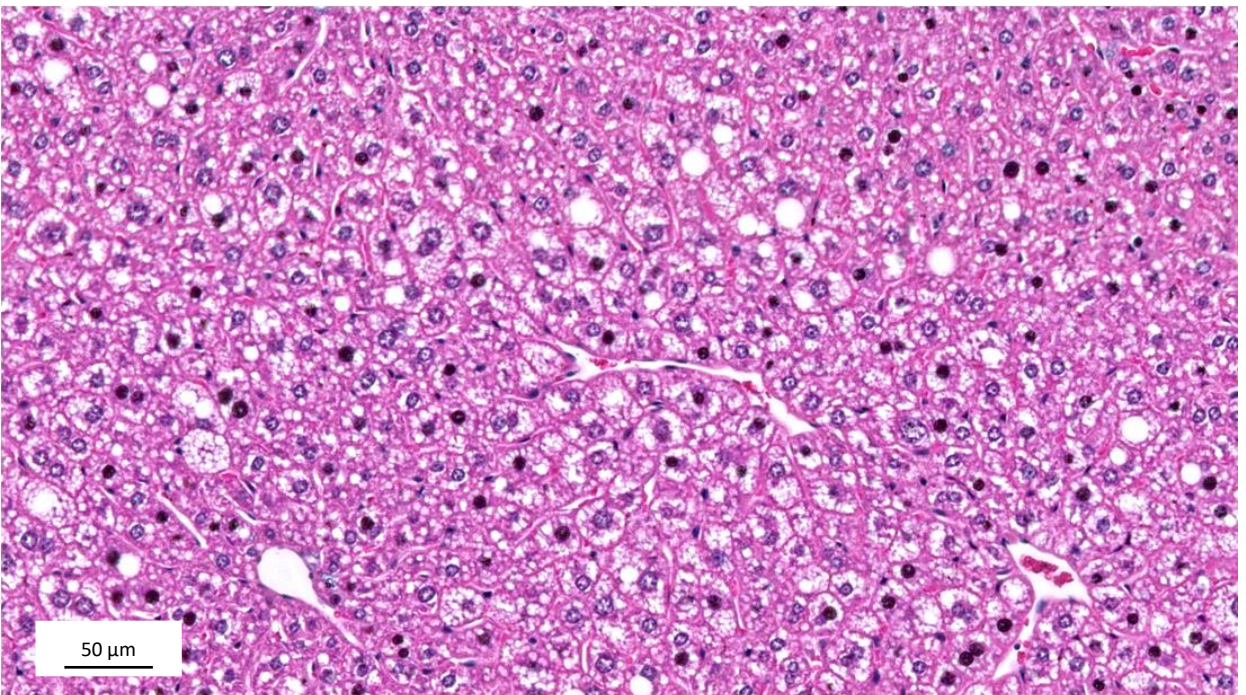

# CDHFD-C-3

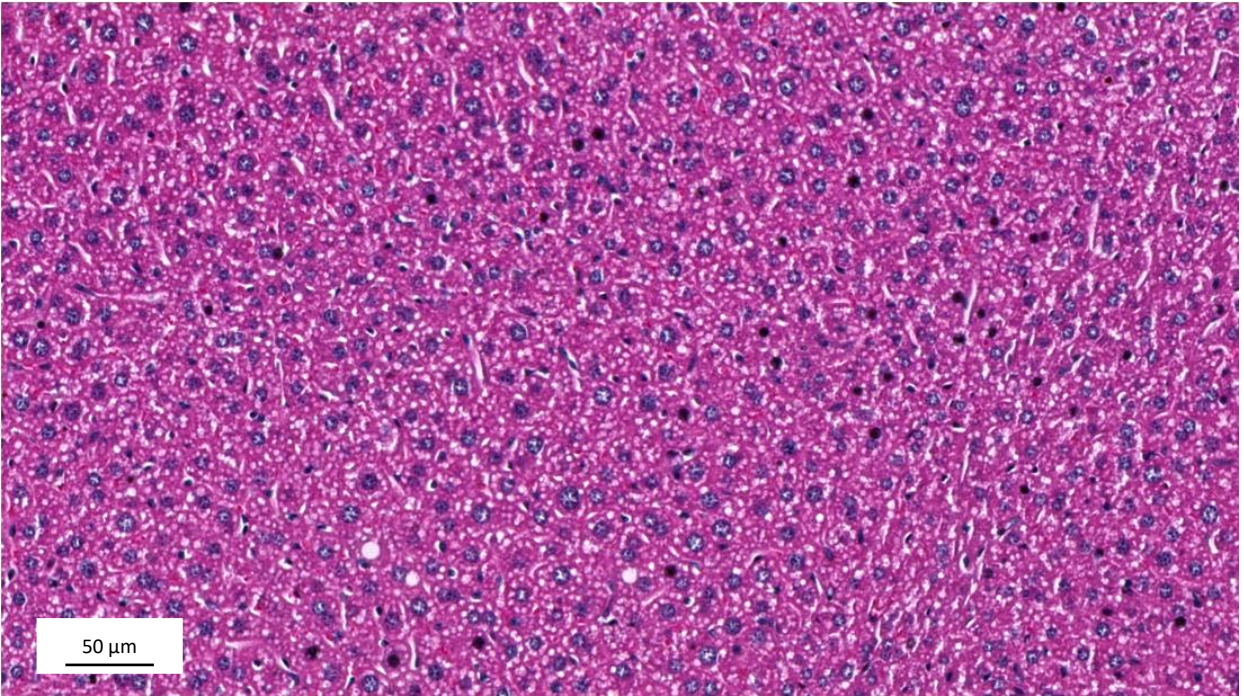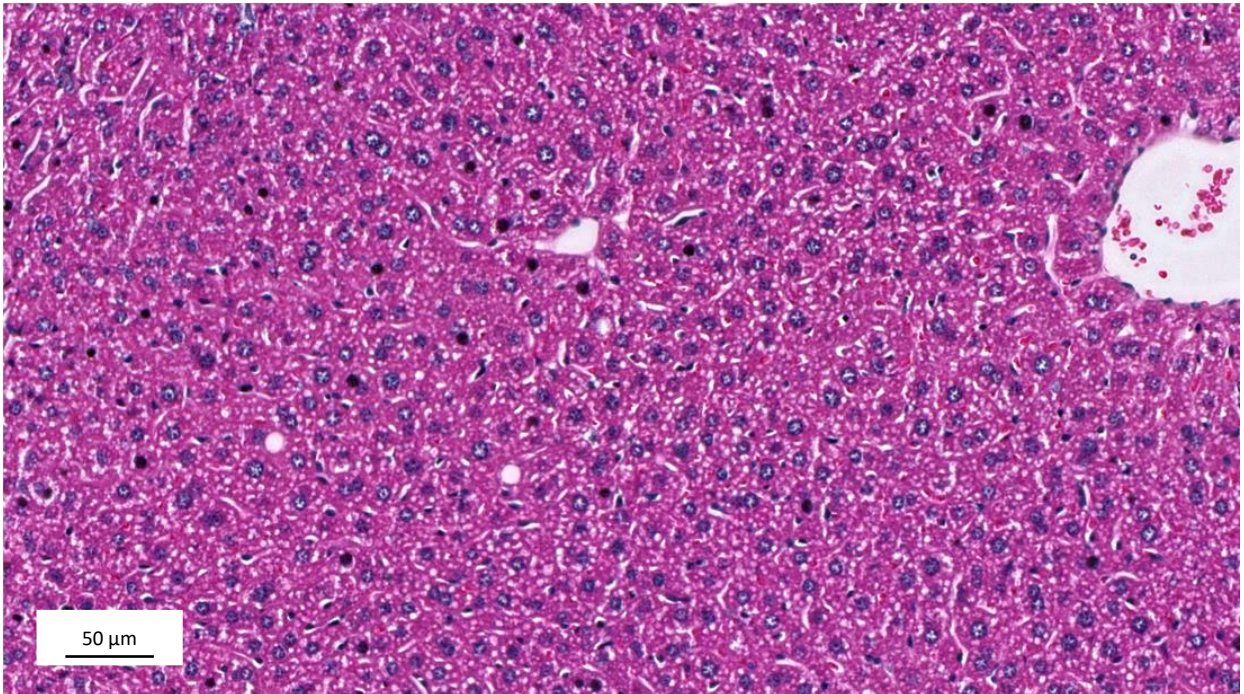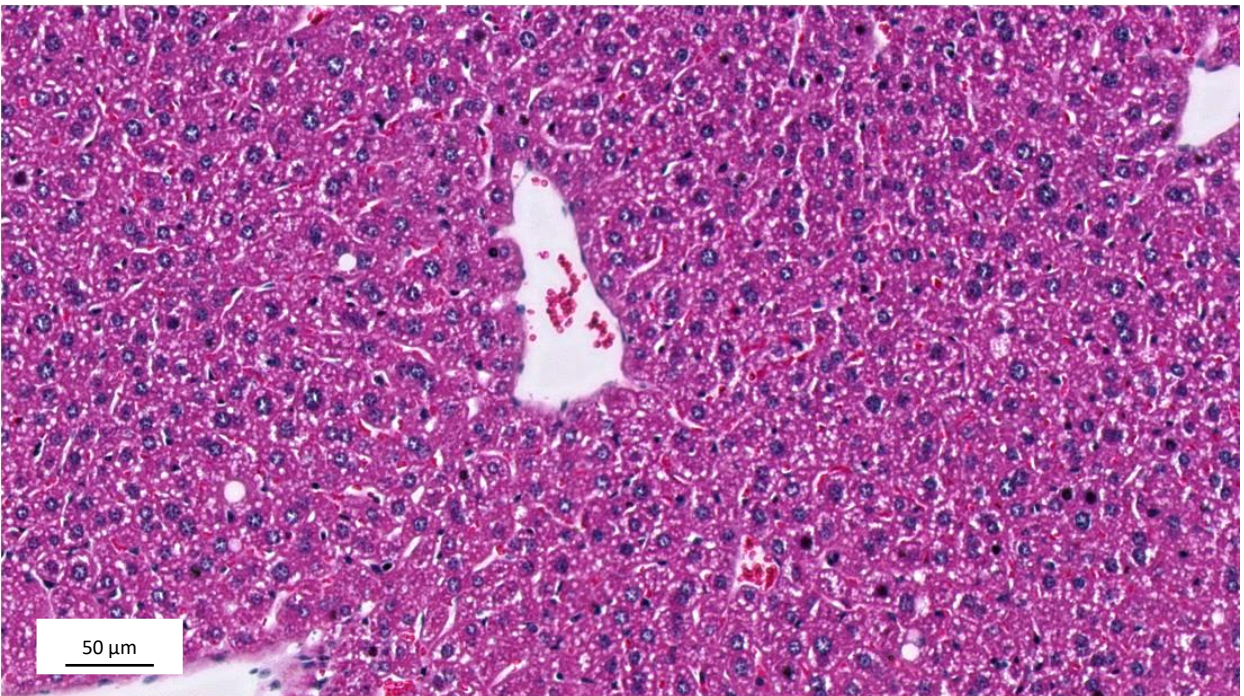

CDHFD-C-4

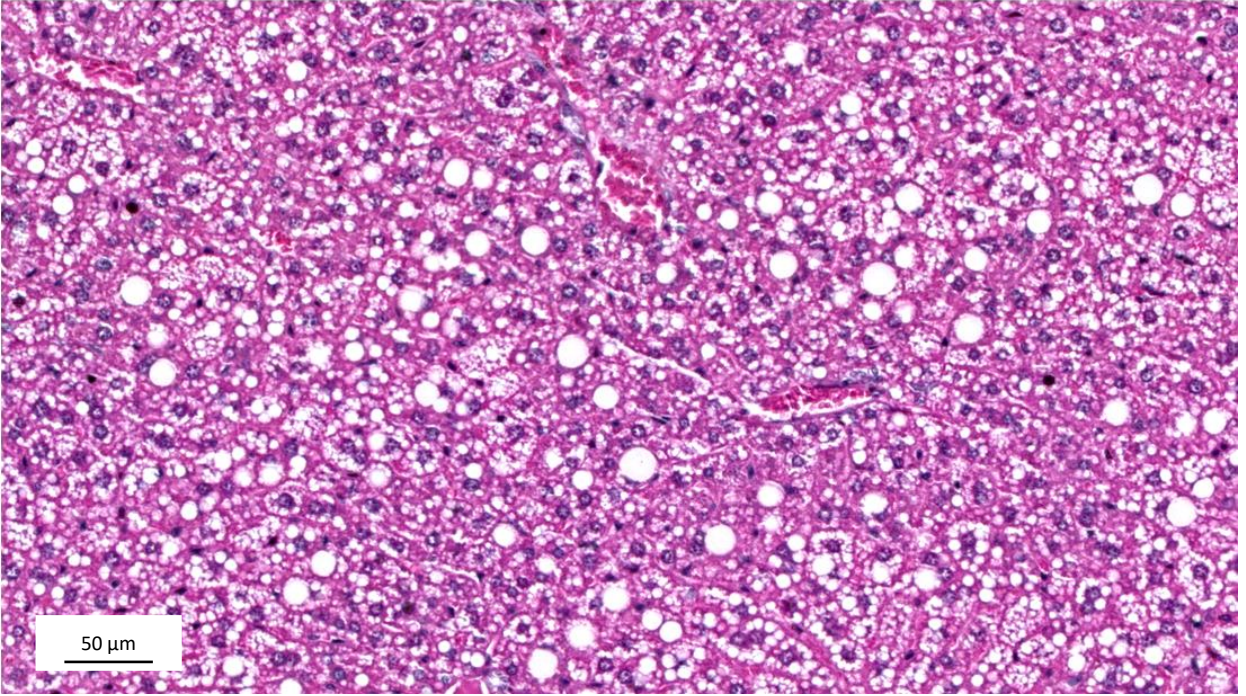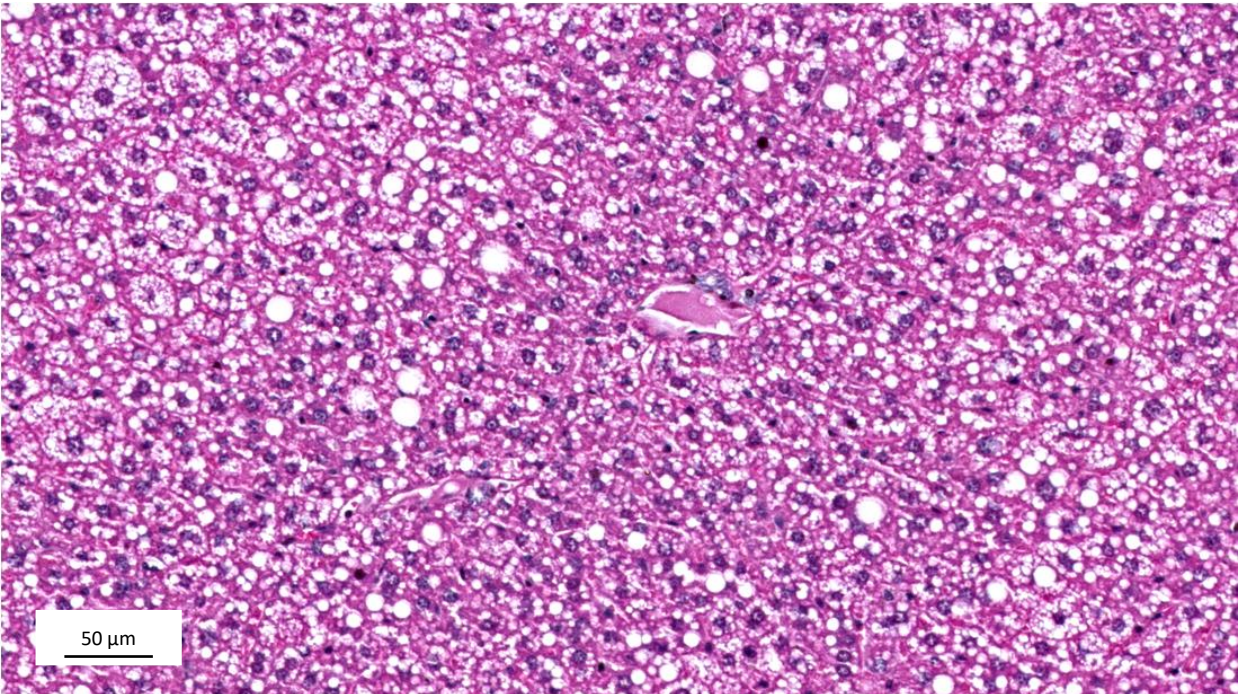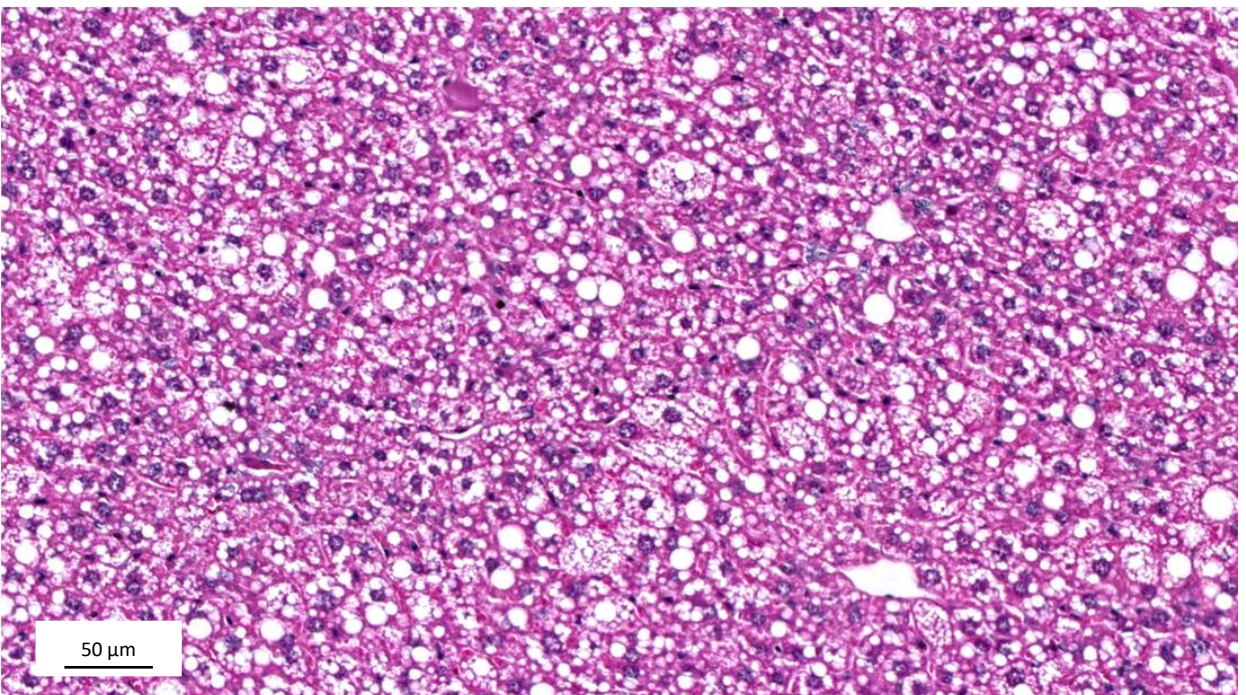

CDHFD-C-5

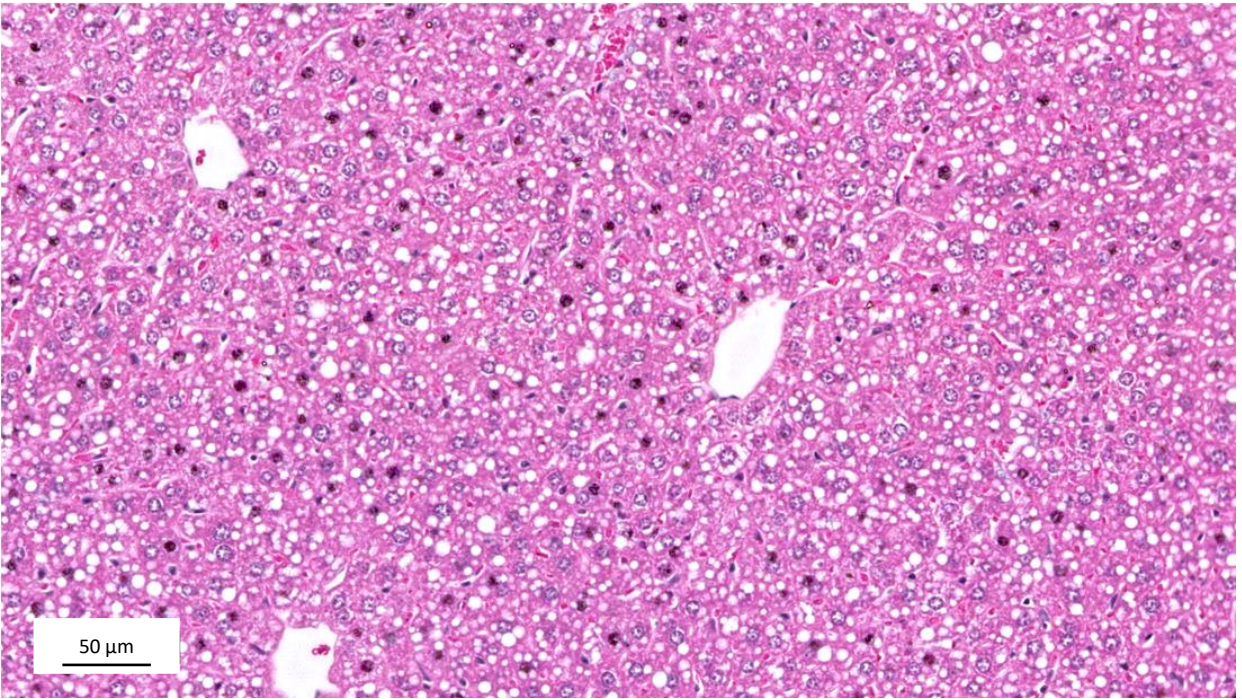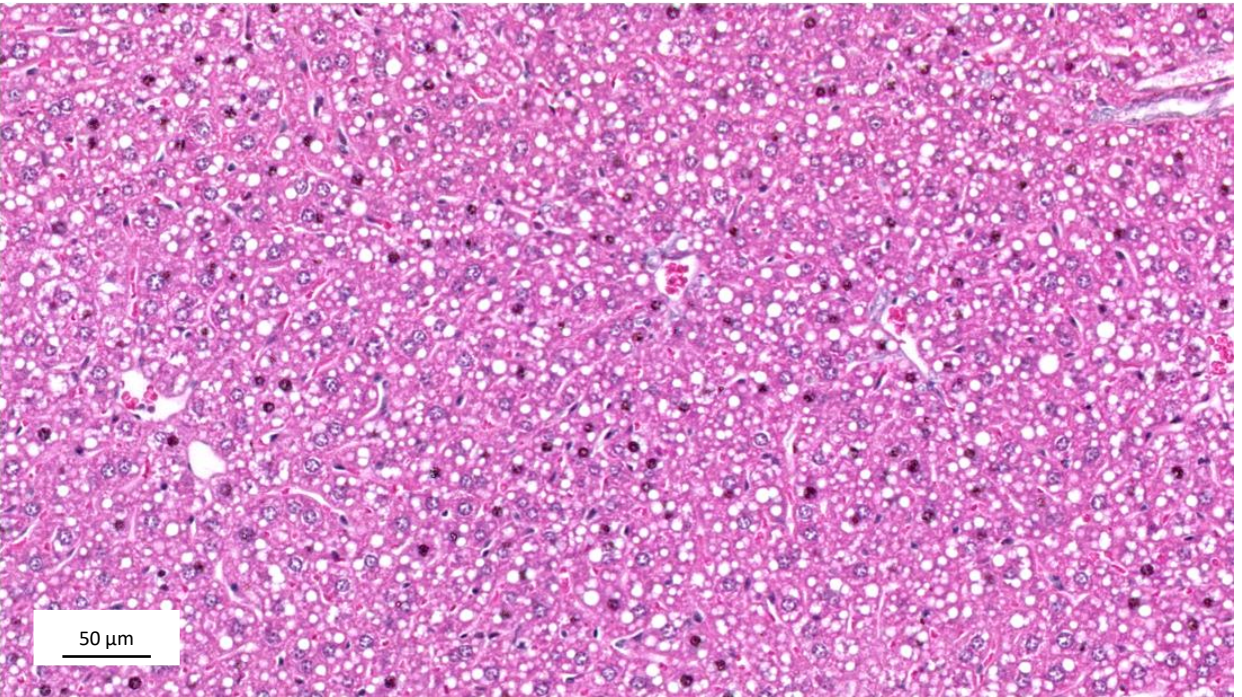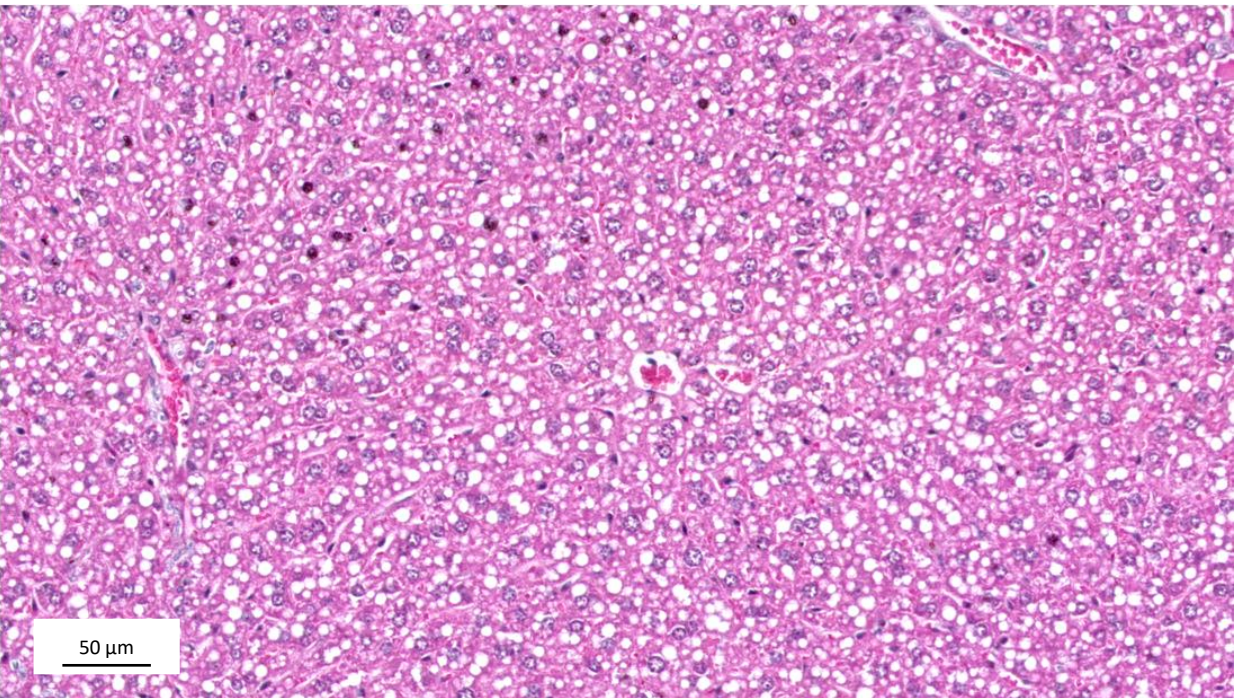



CDHFD-C-6

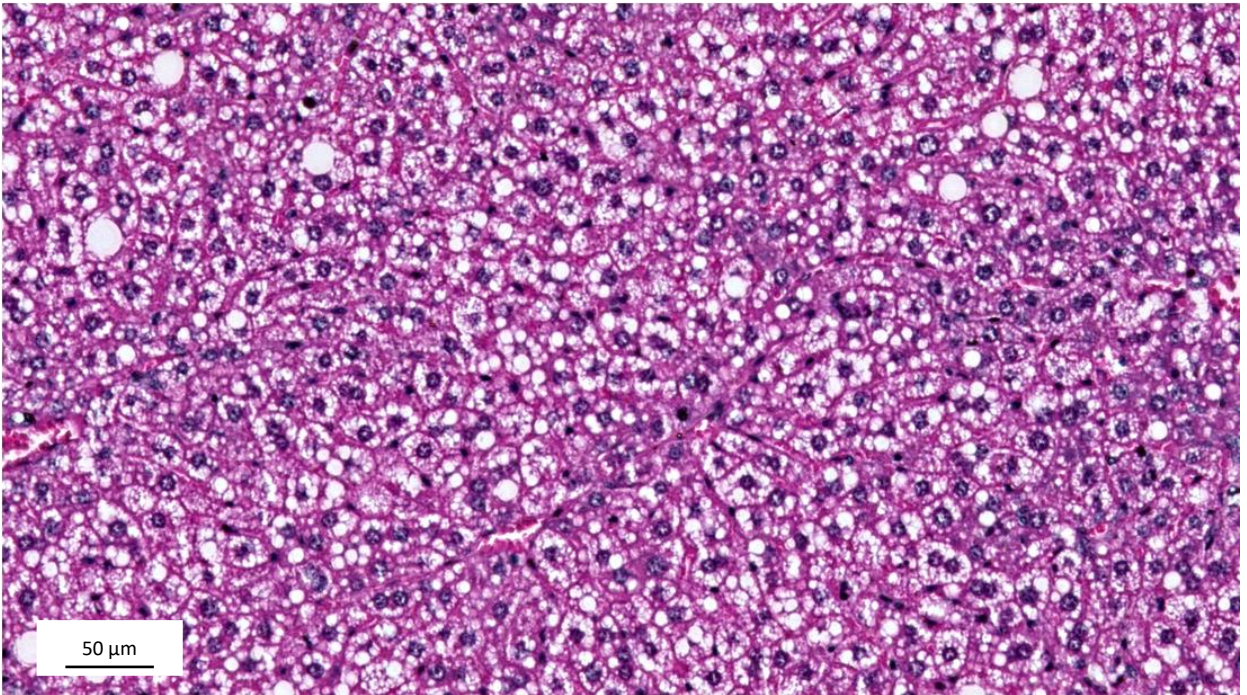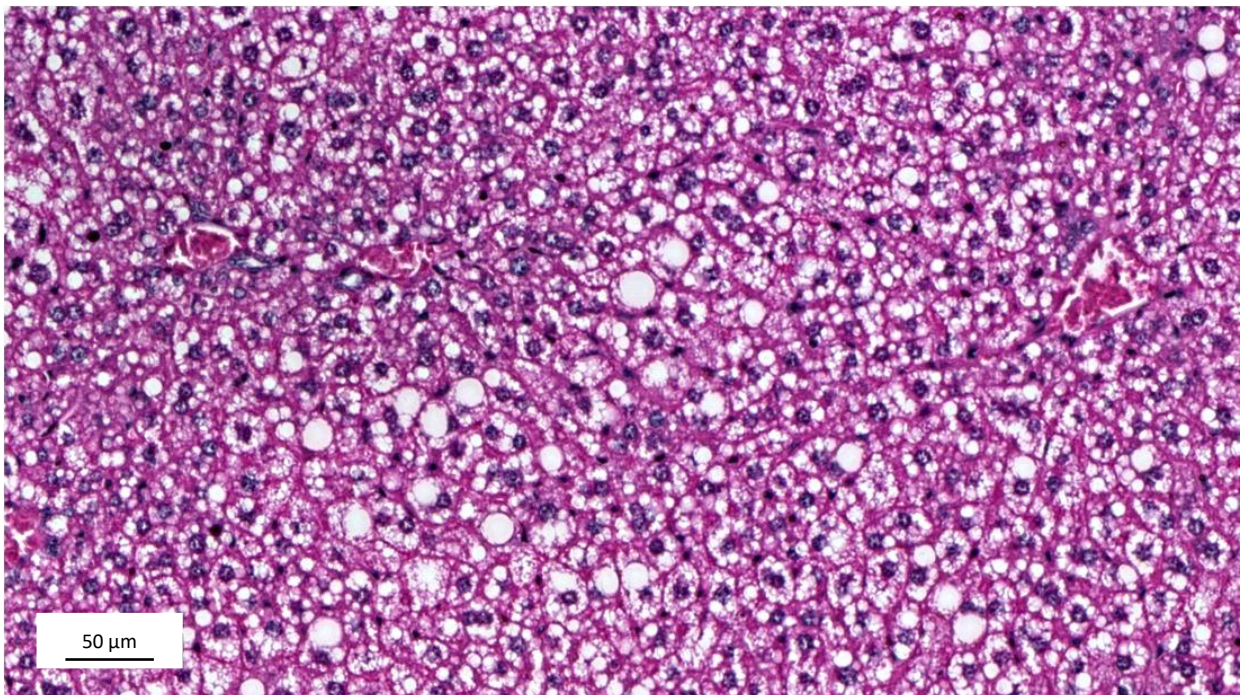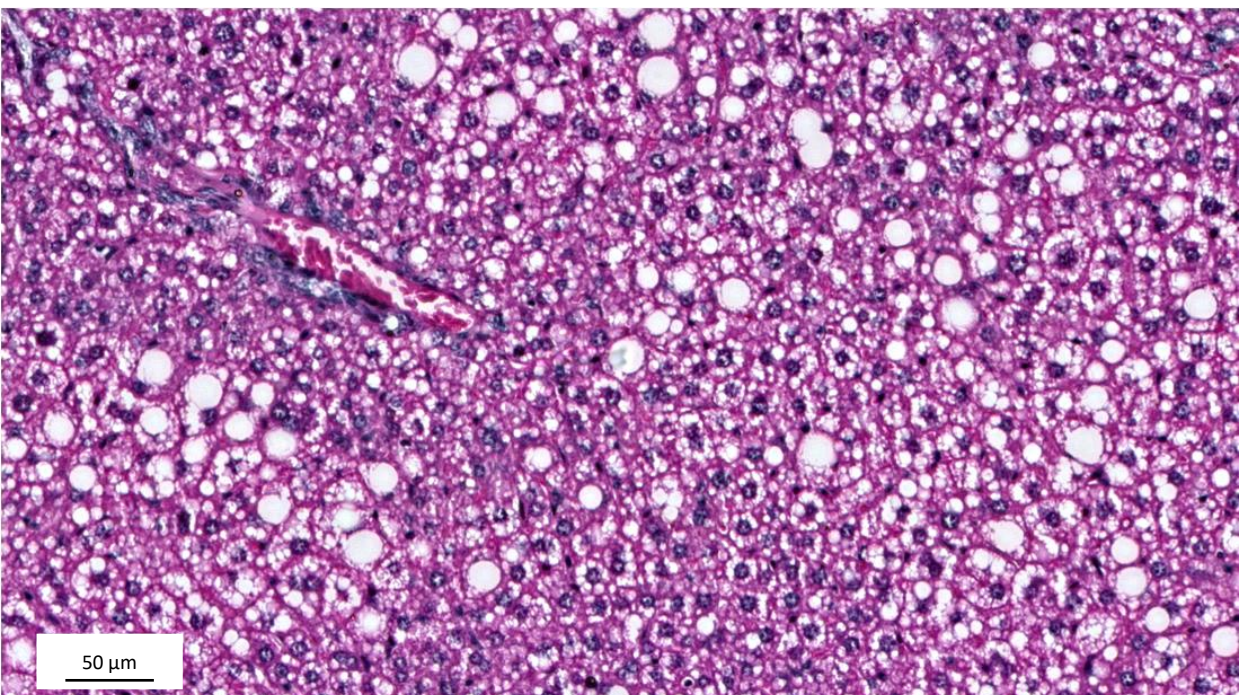

# CDHFD-C-7

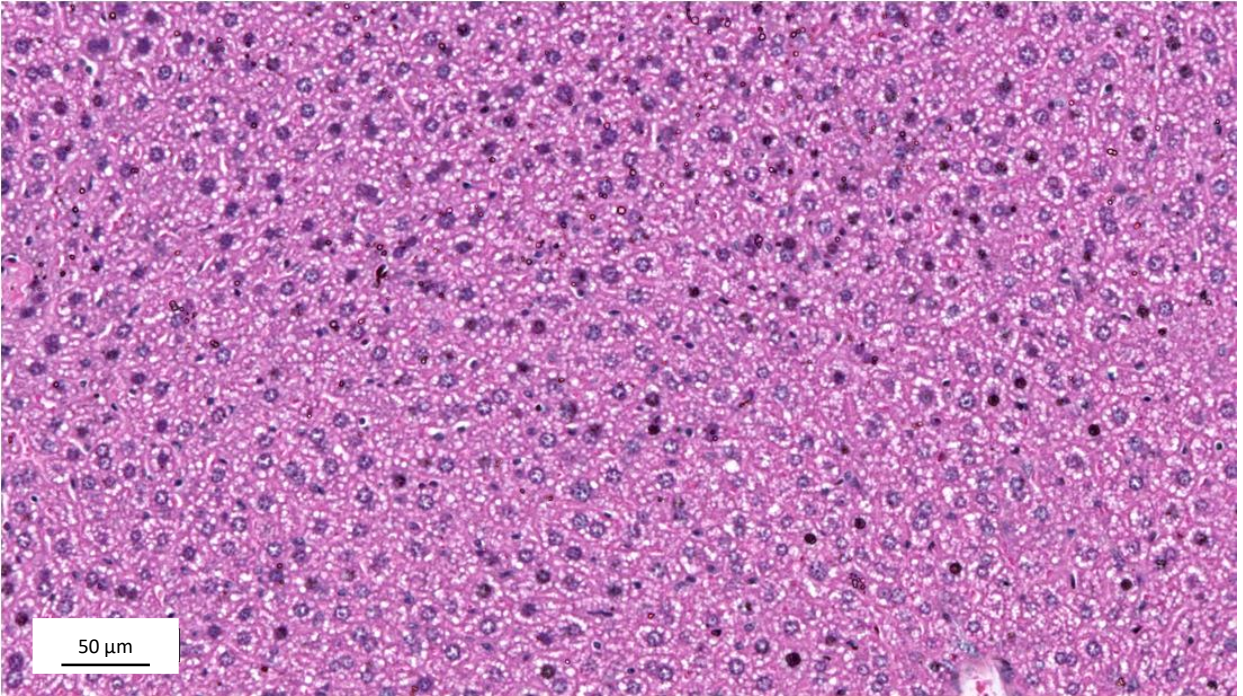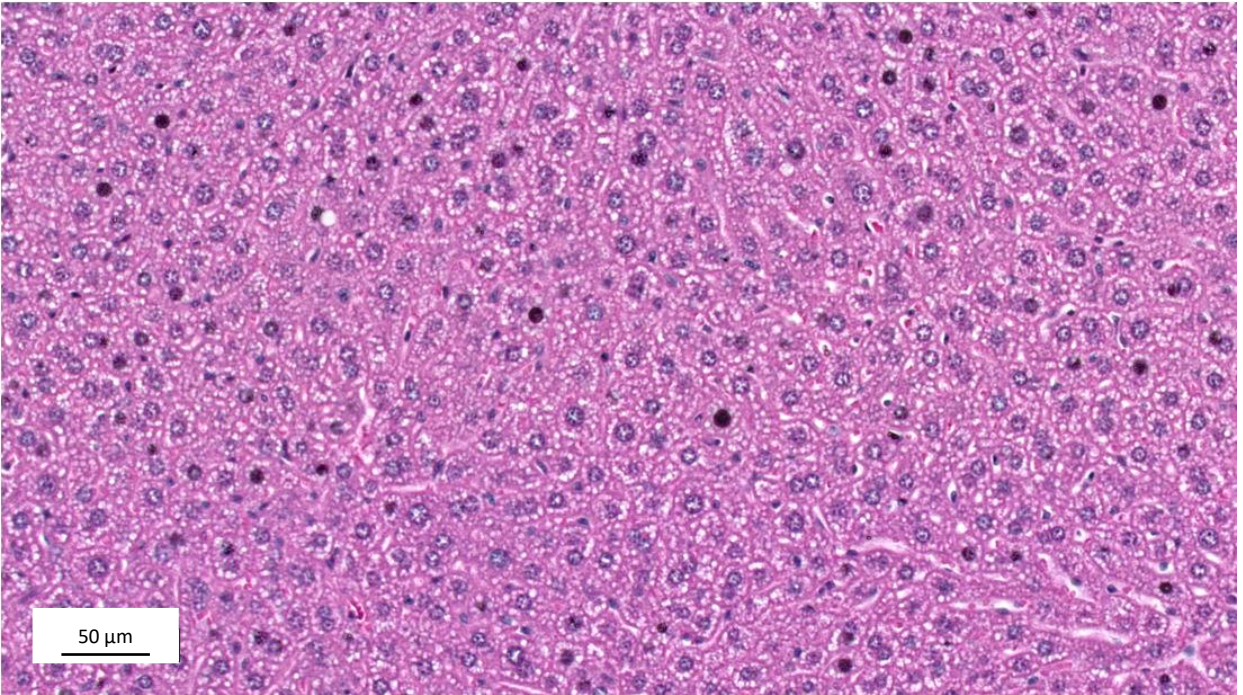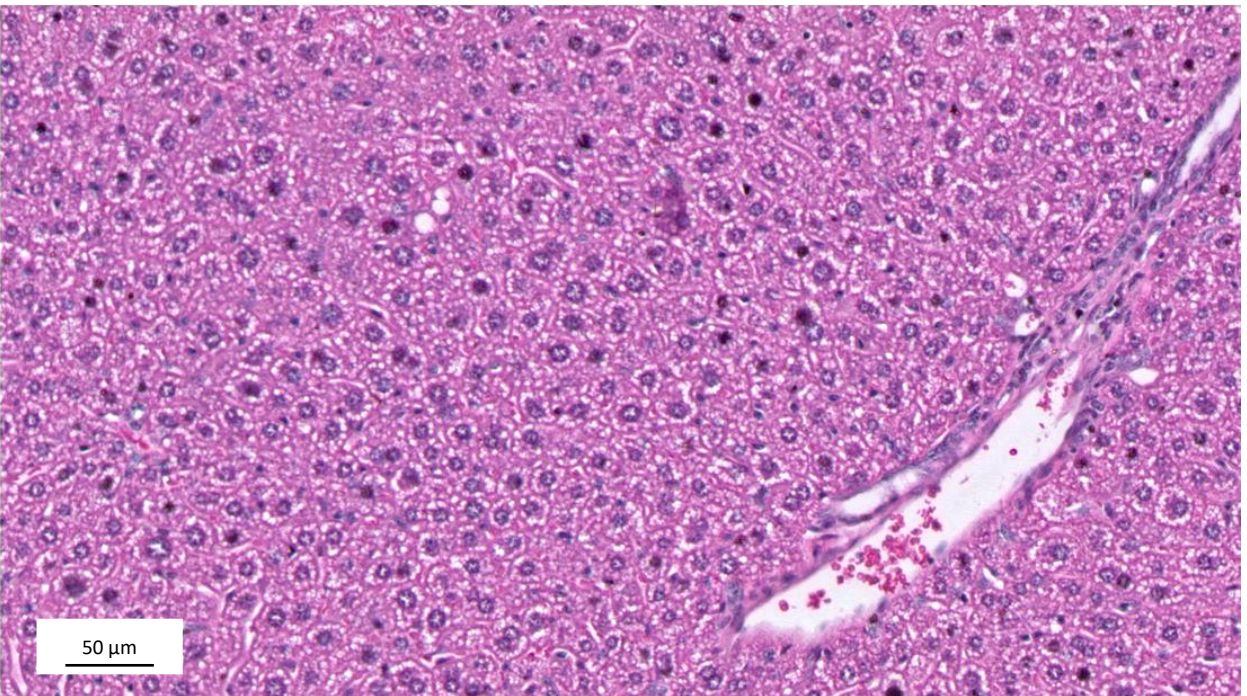

CDHFD-C-8

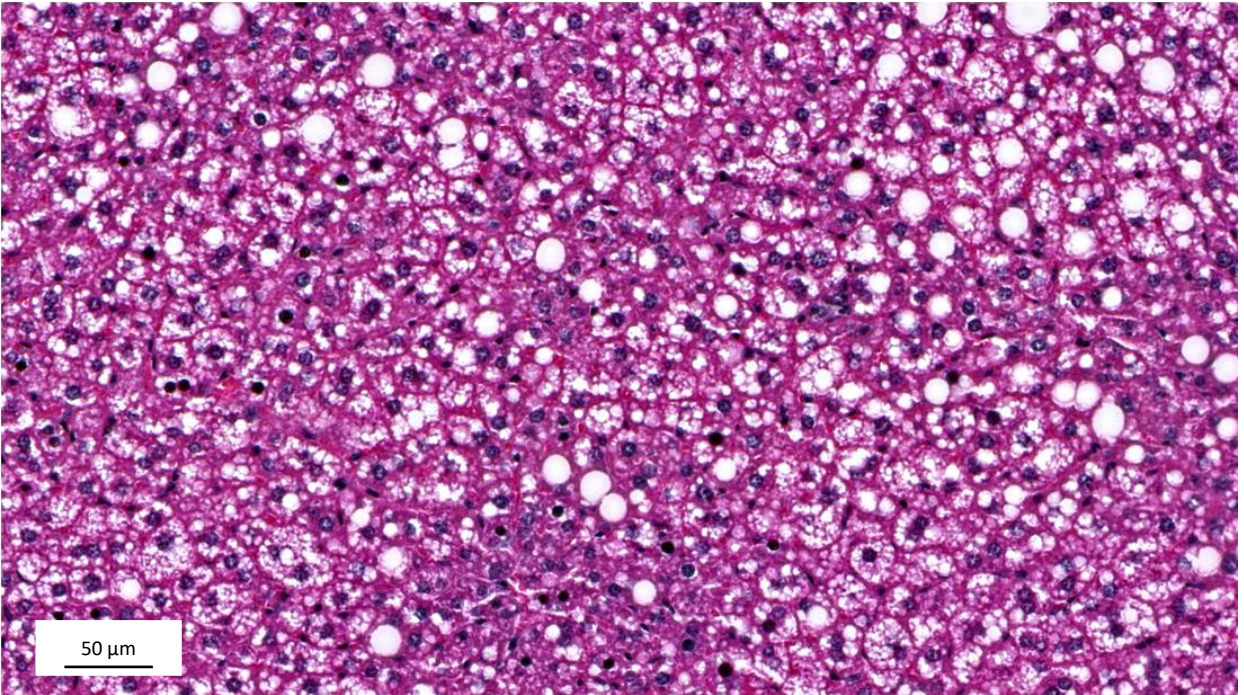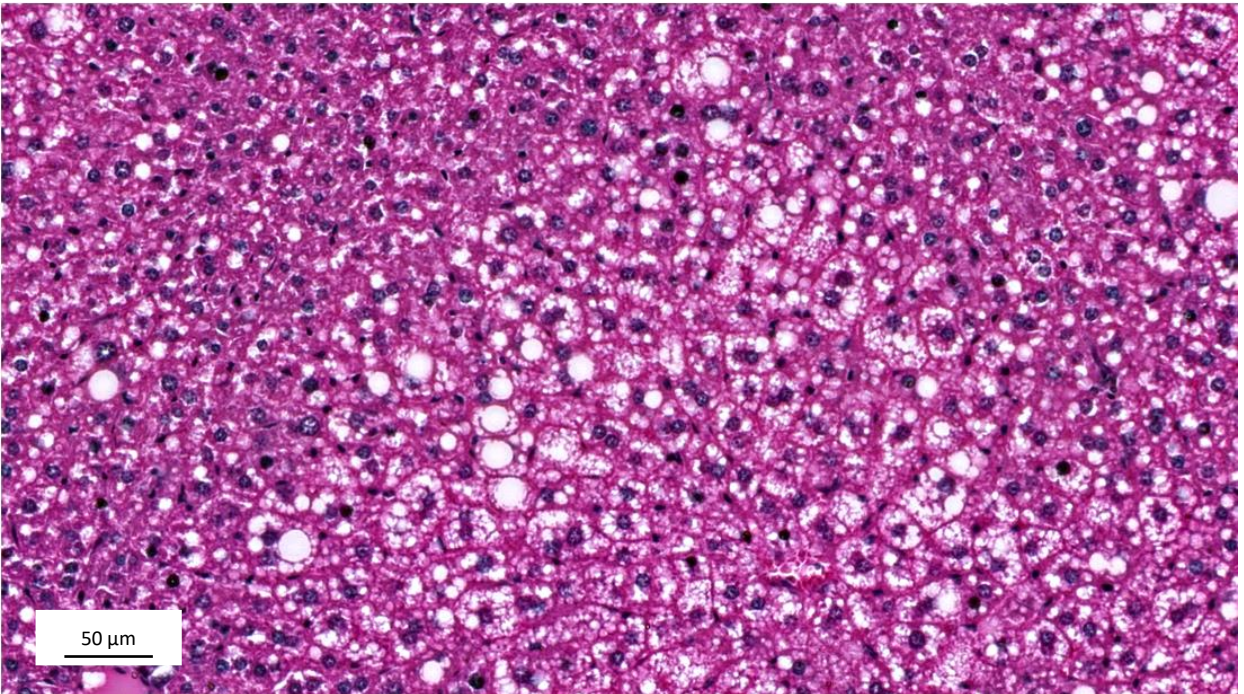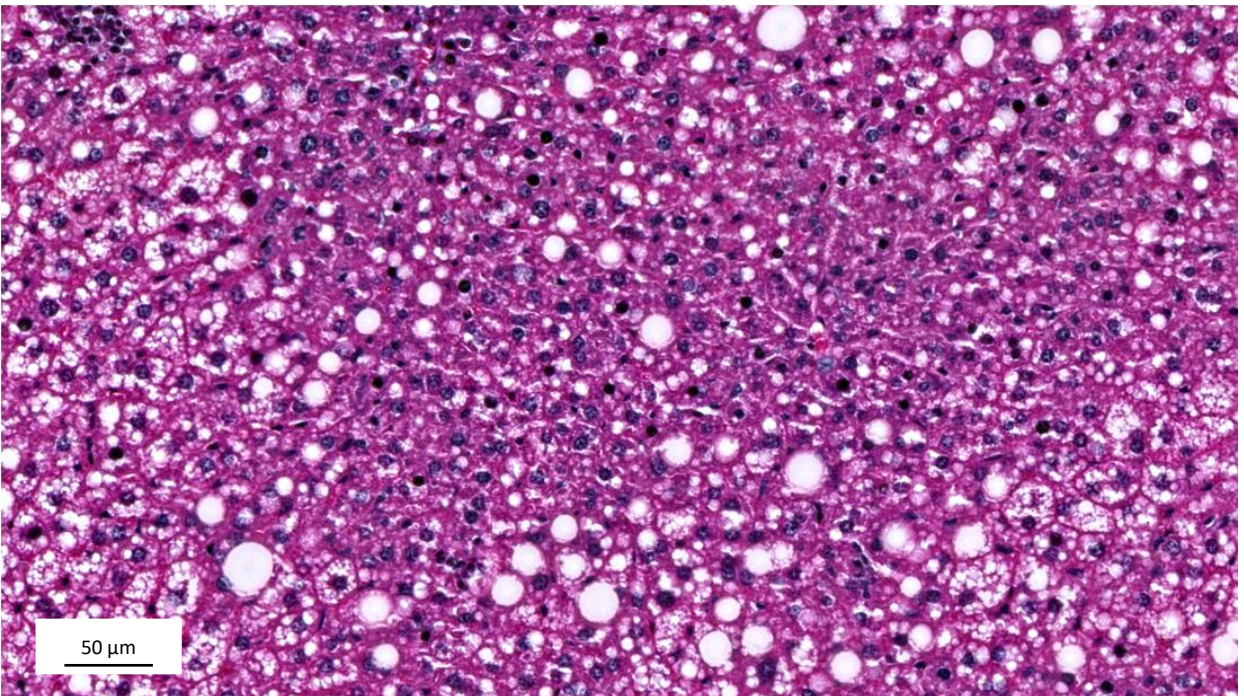

# CDHFD-C-9

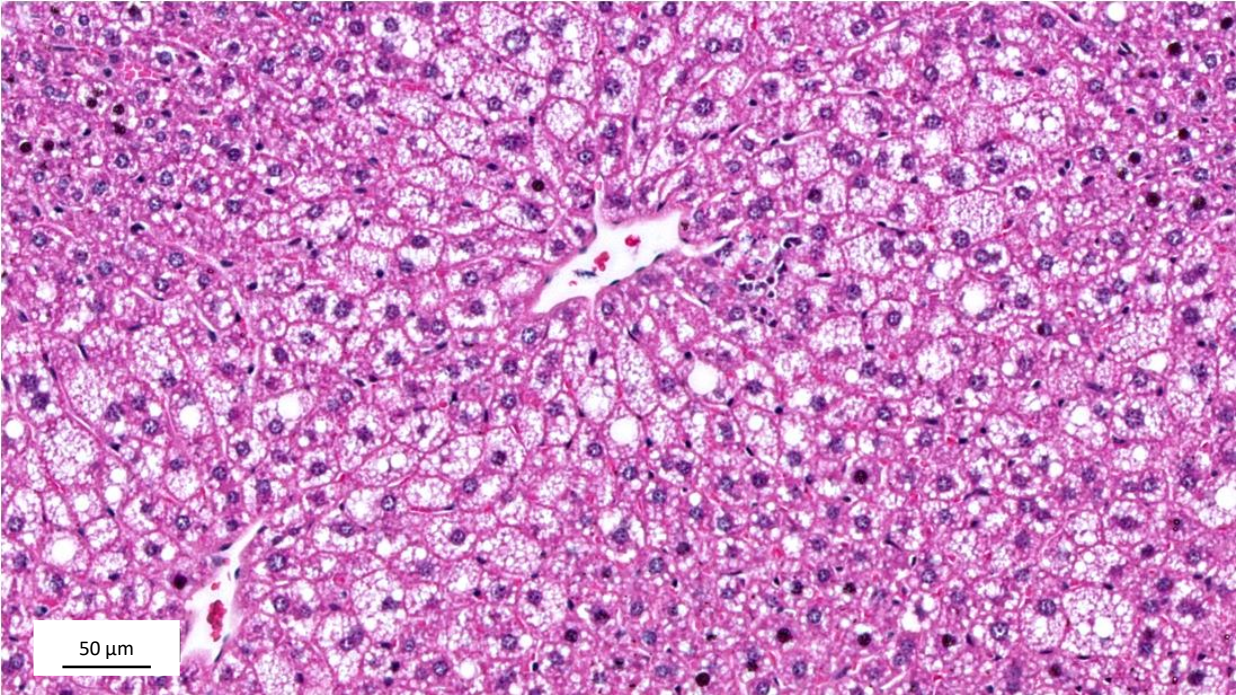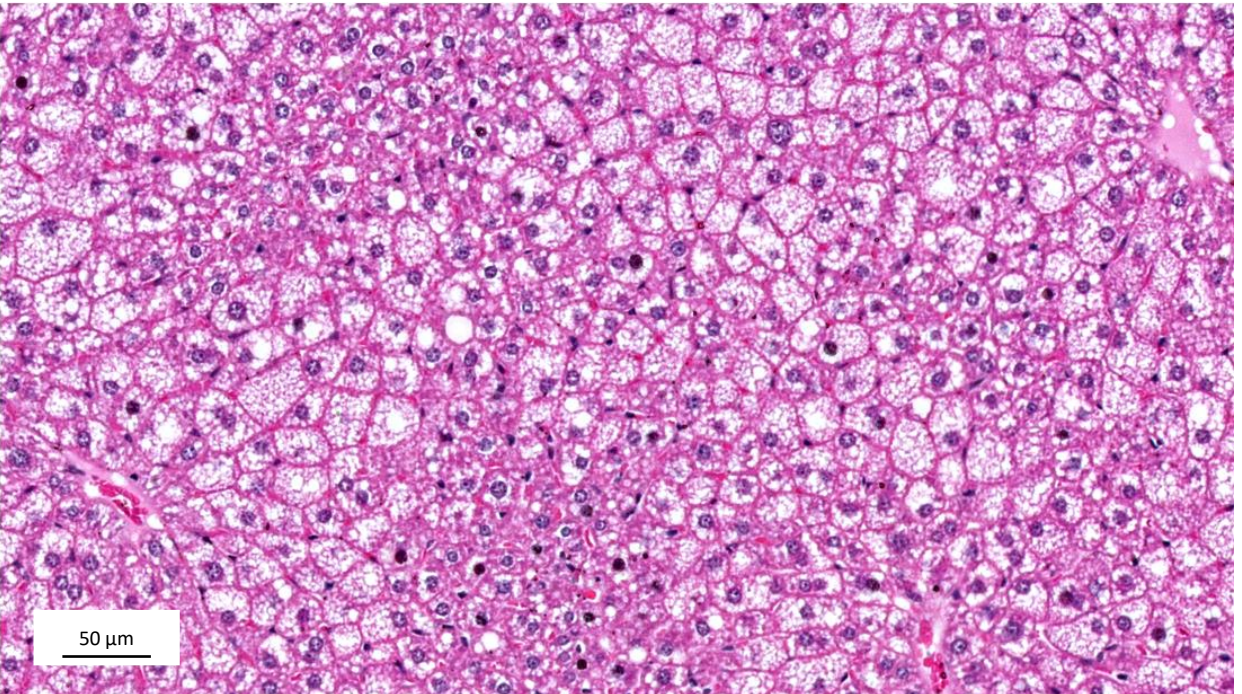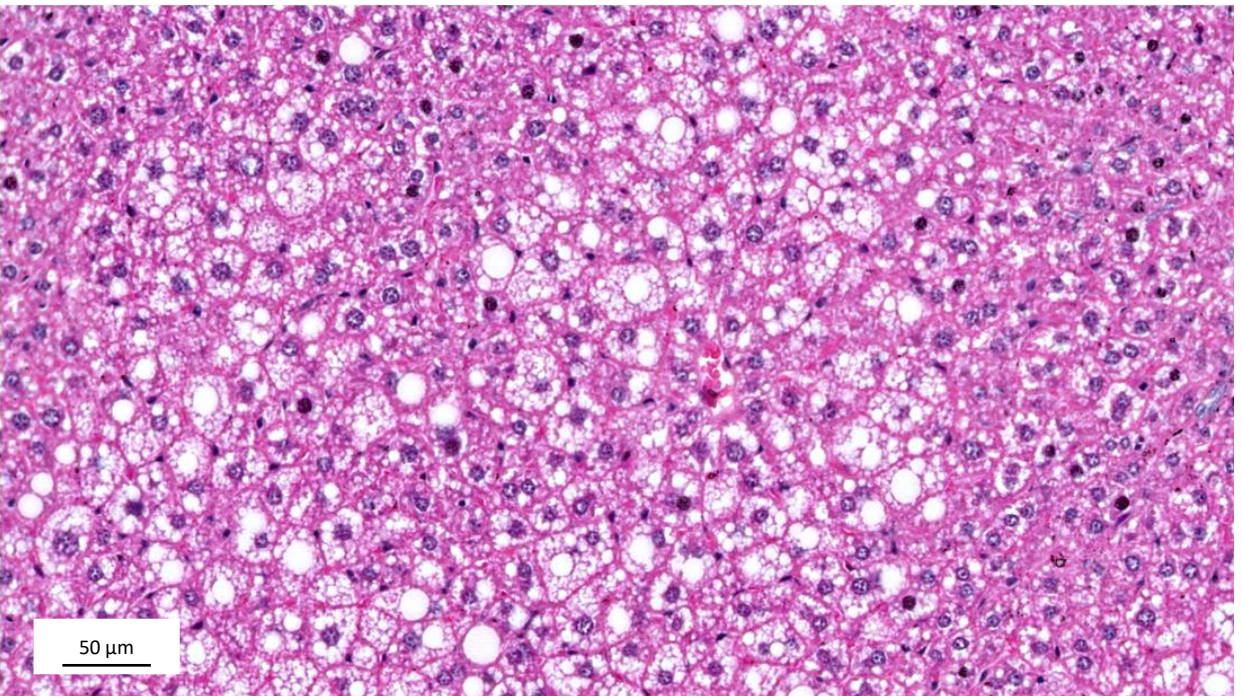

CDHFD-C-10

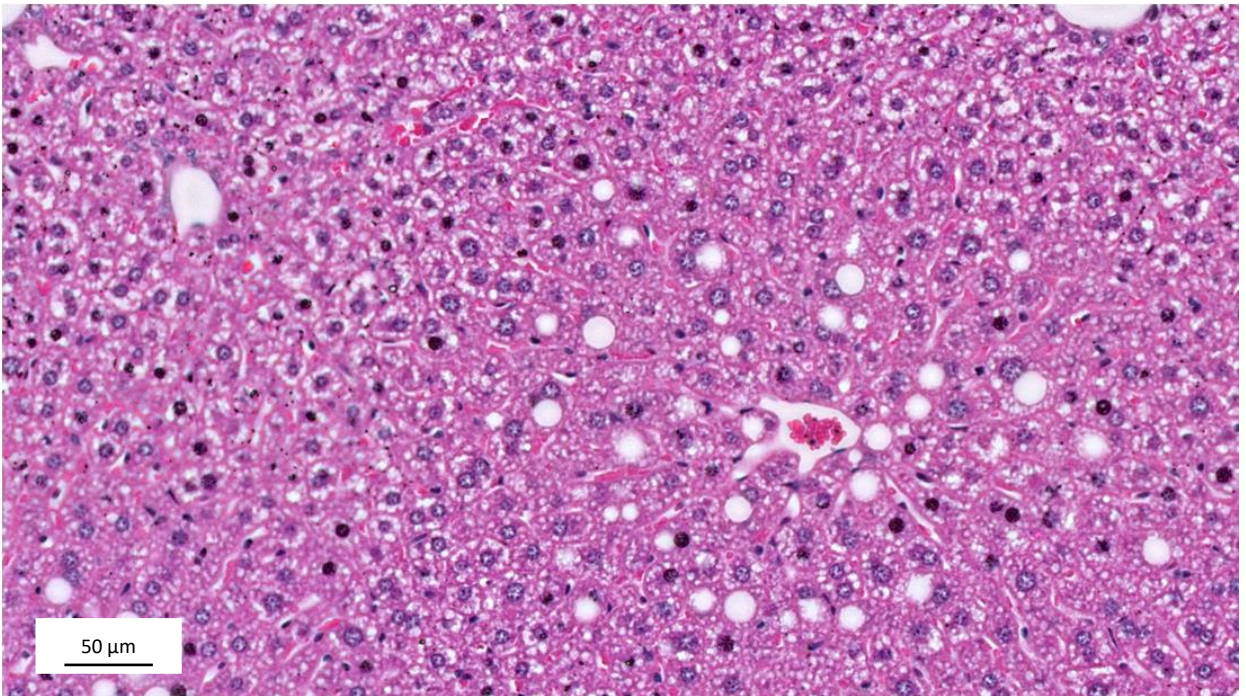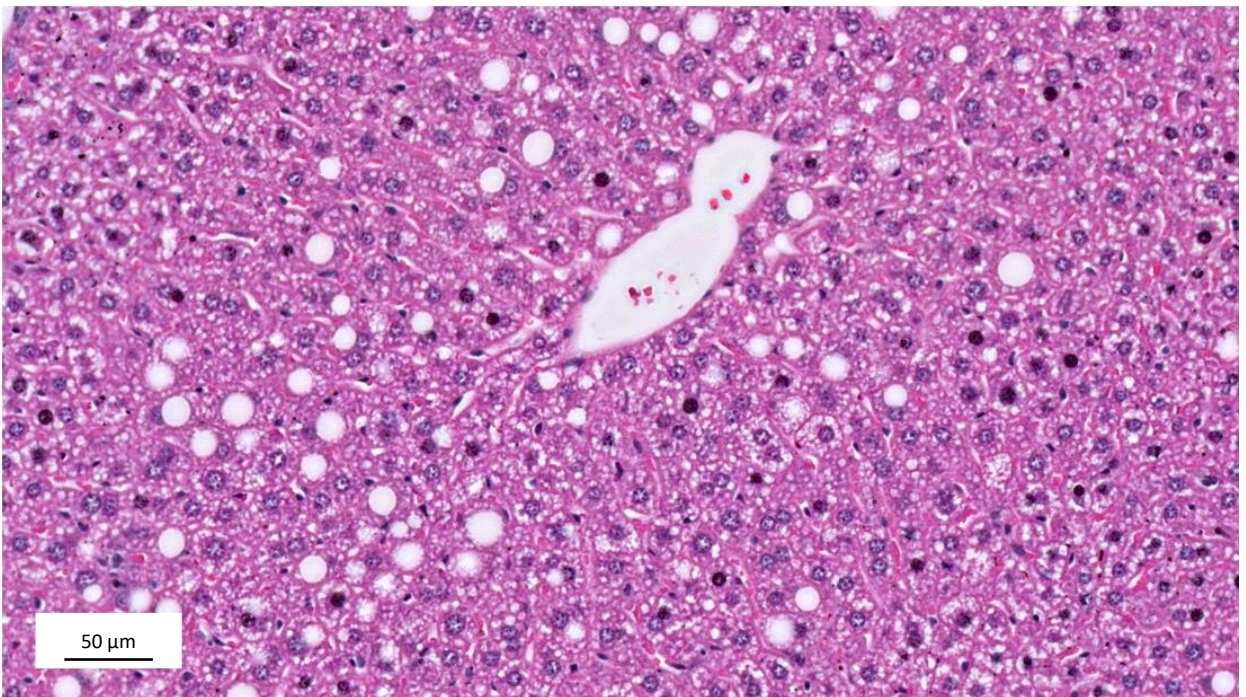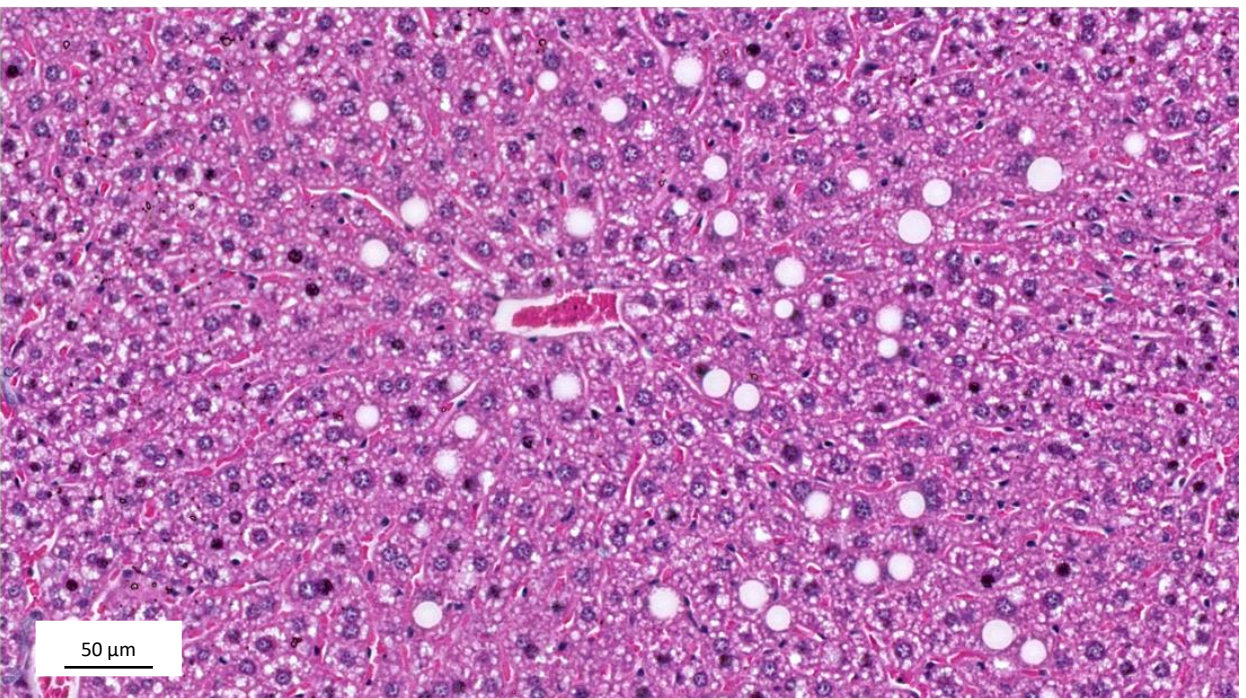

CDHFD-C-11

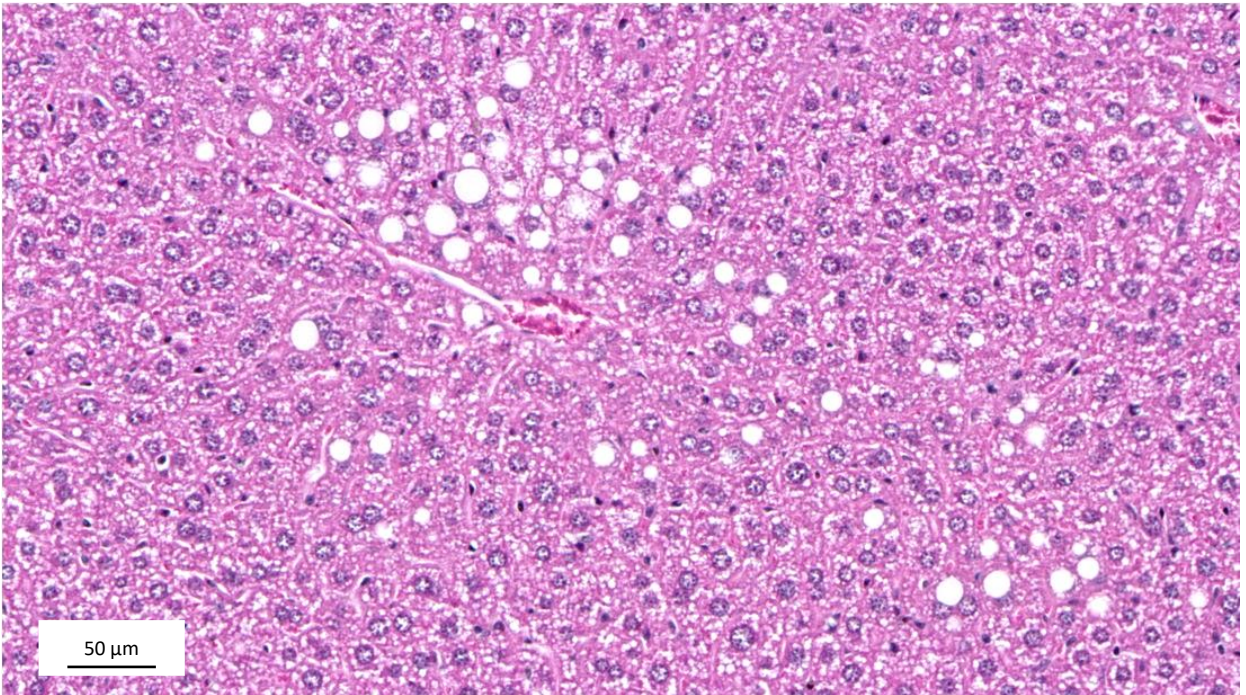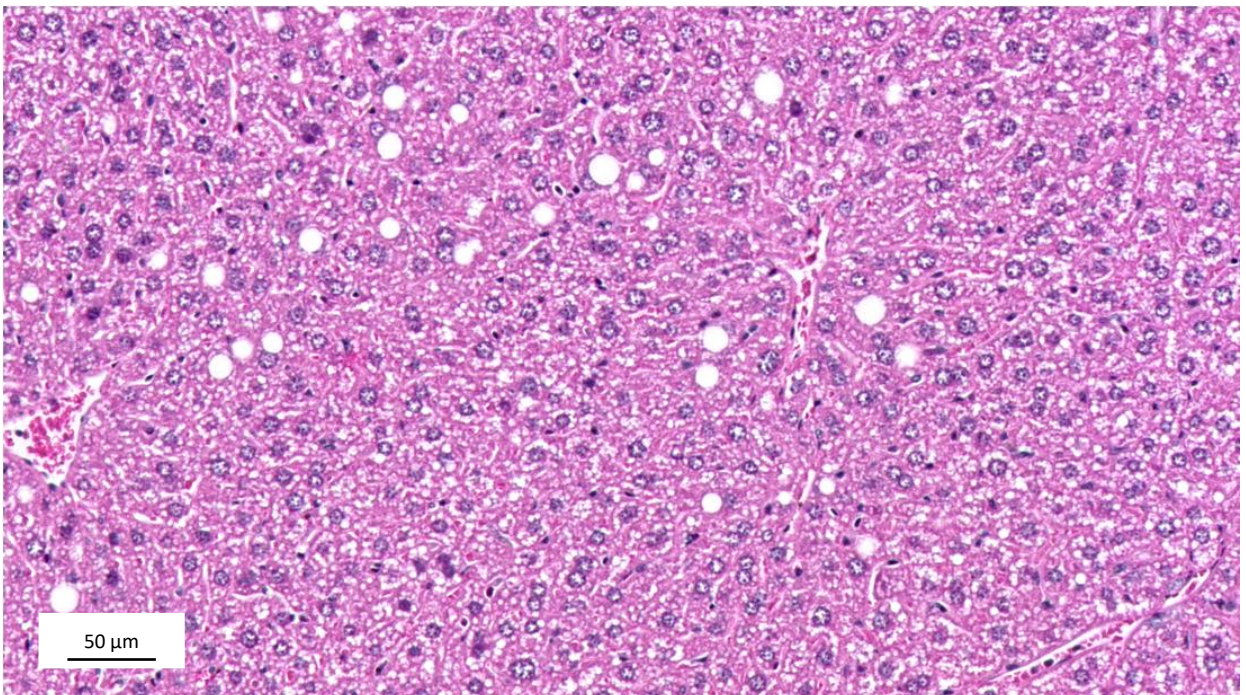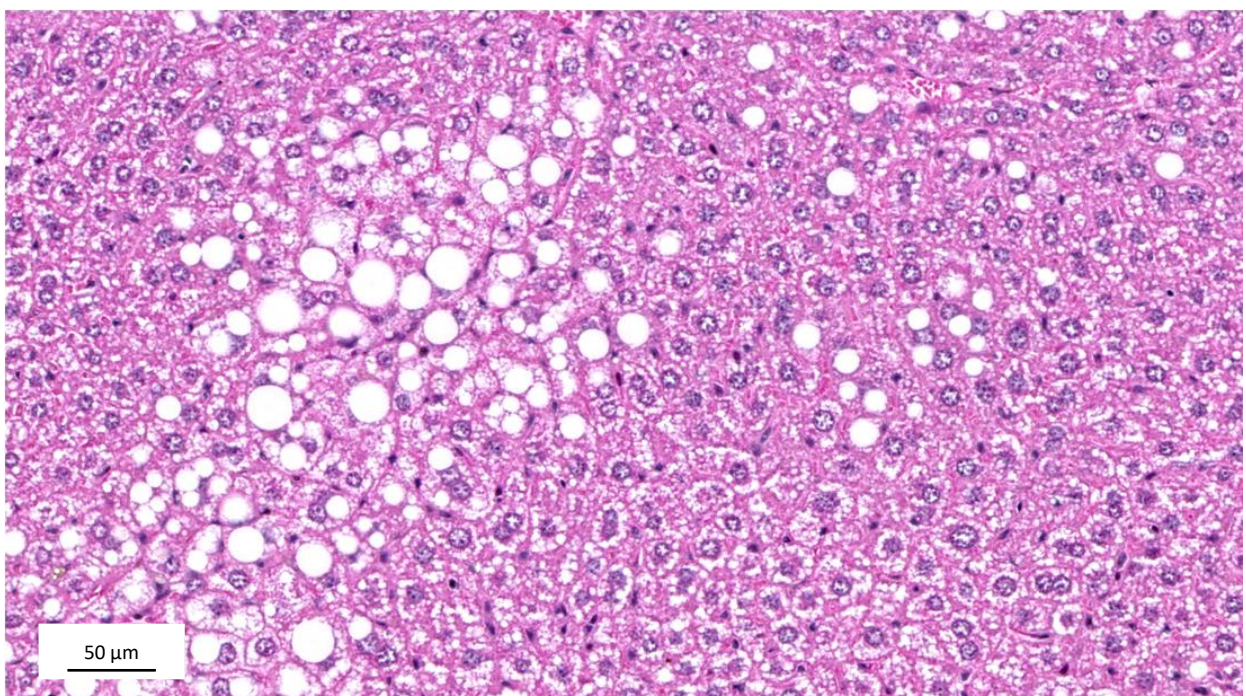

CDHFD-C-12

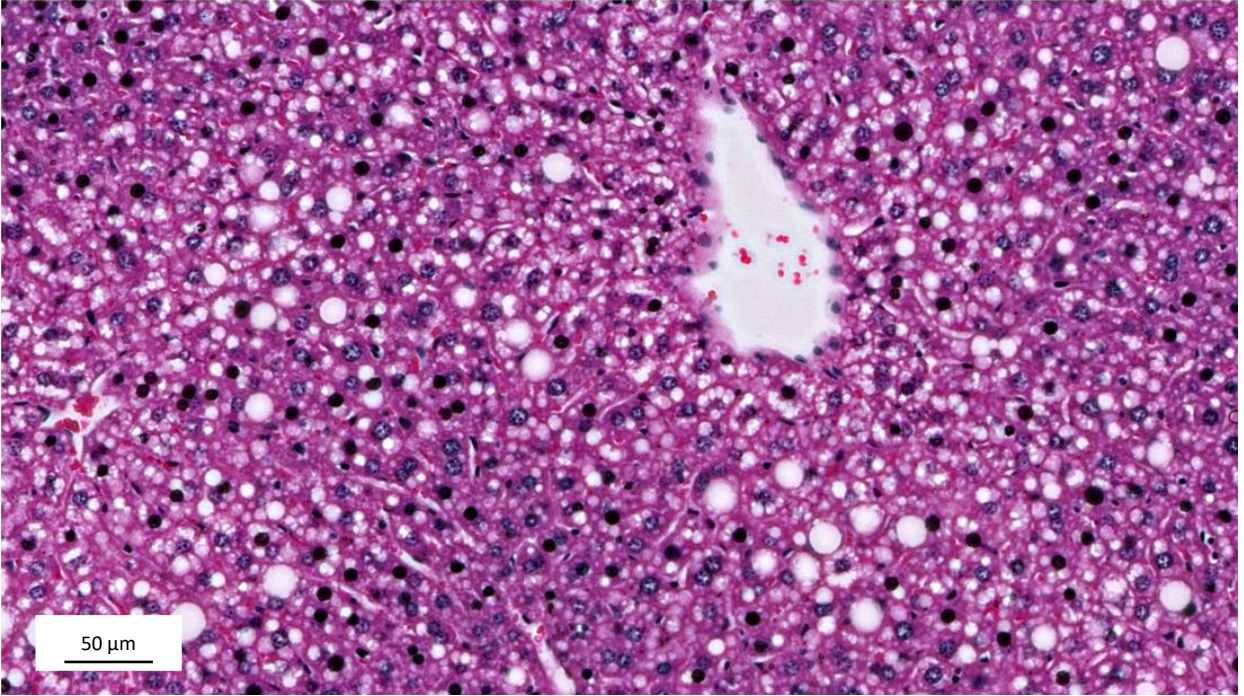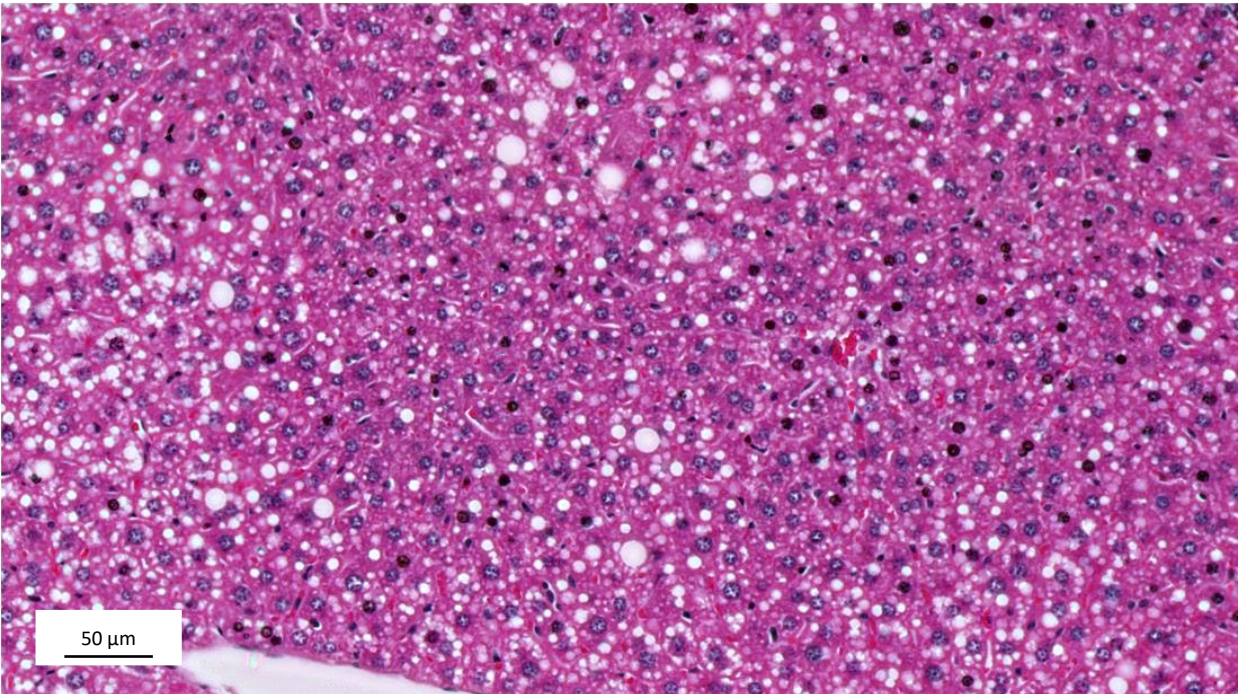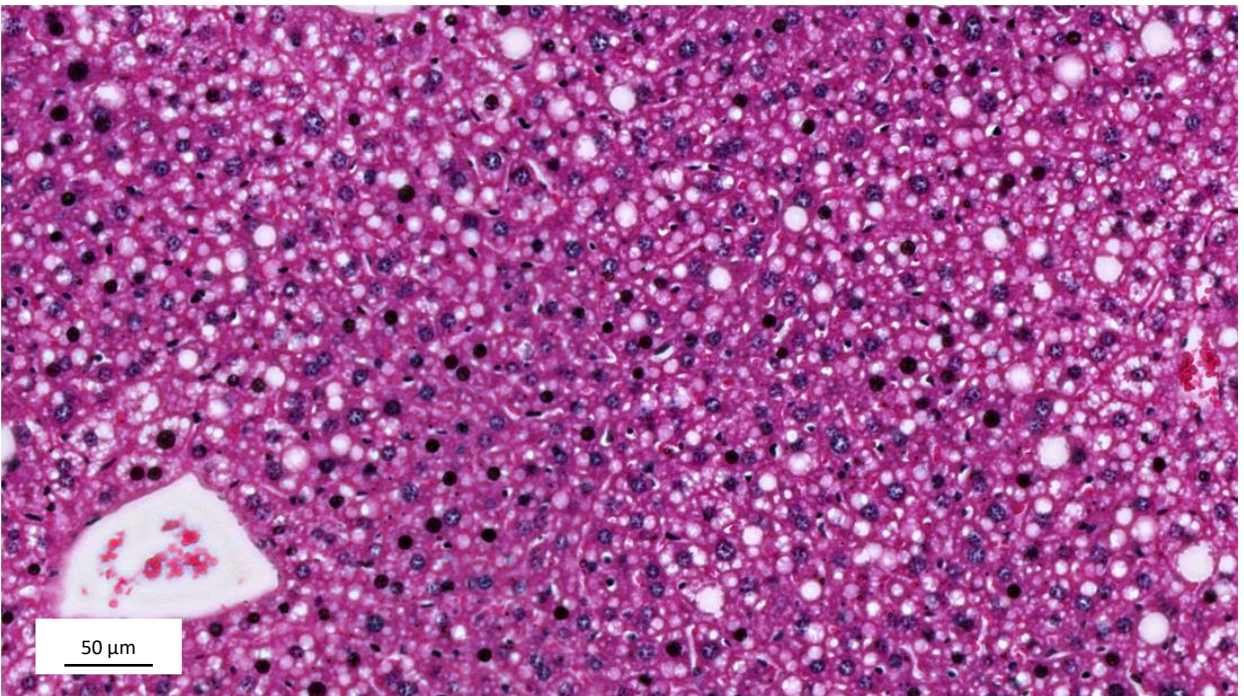

CDHFD-C-13

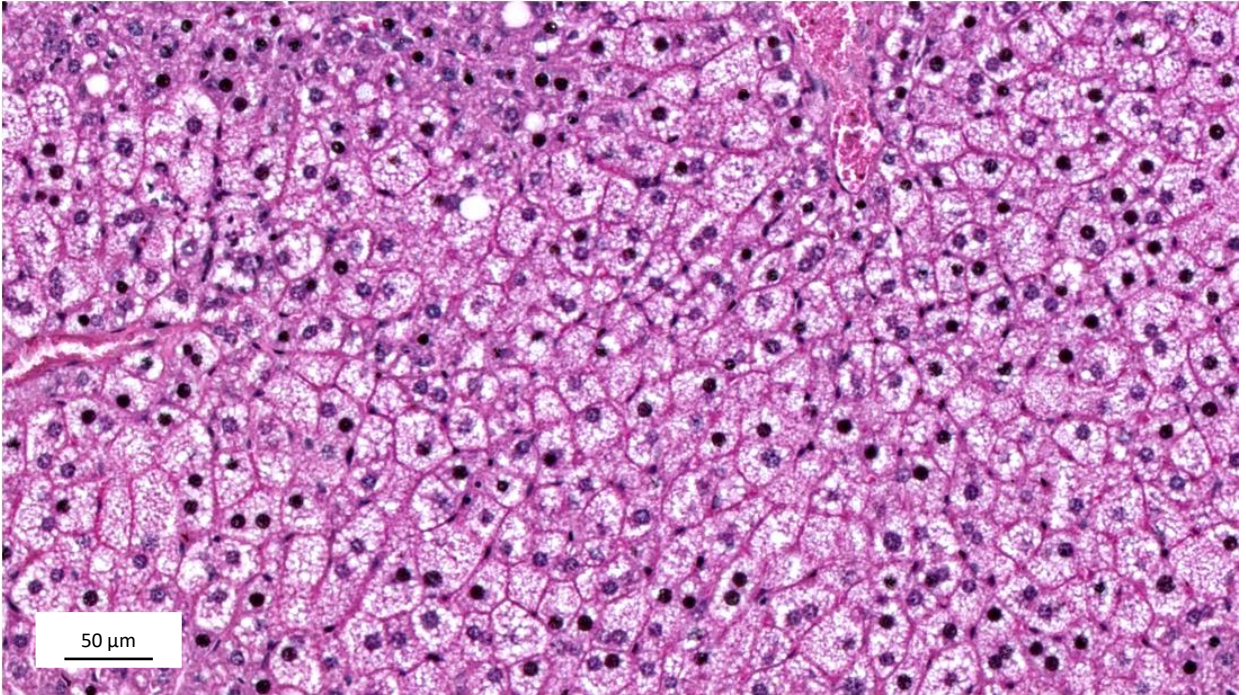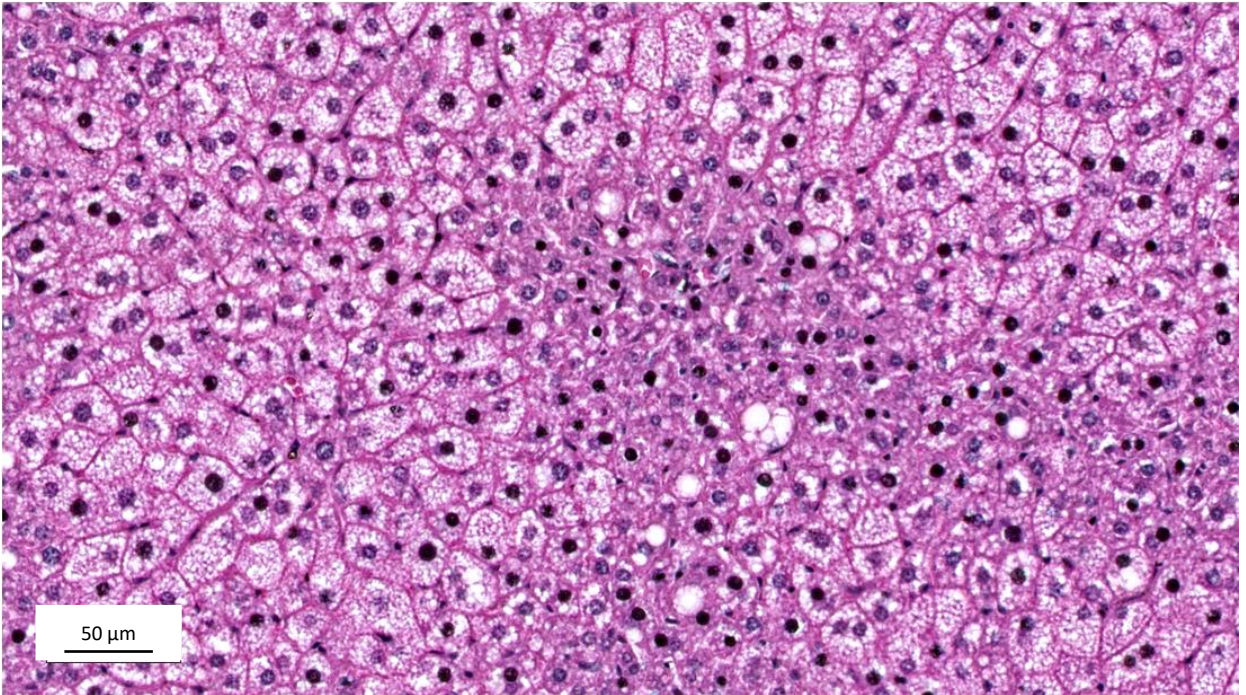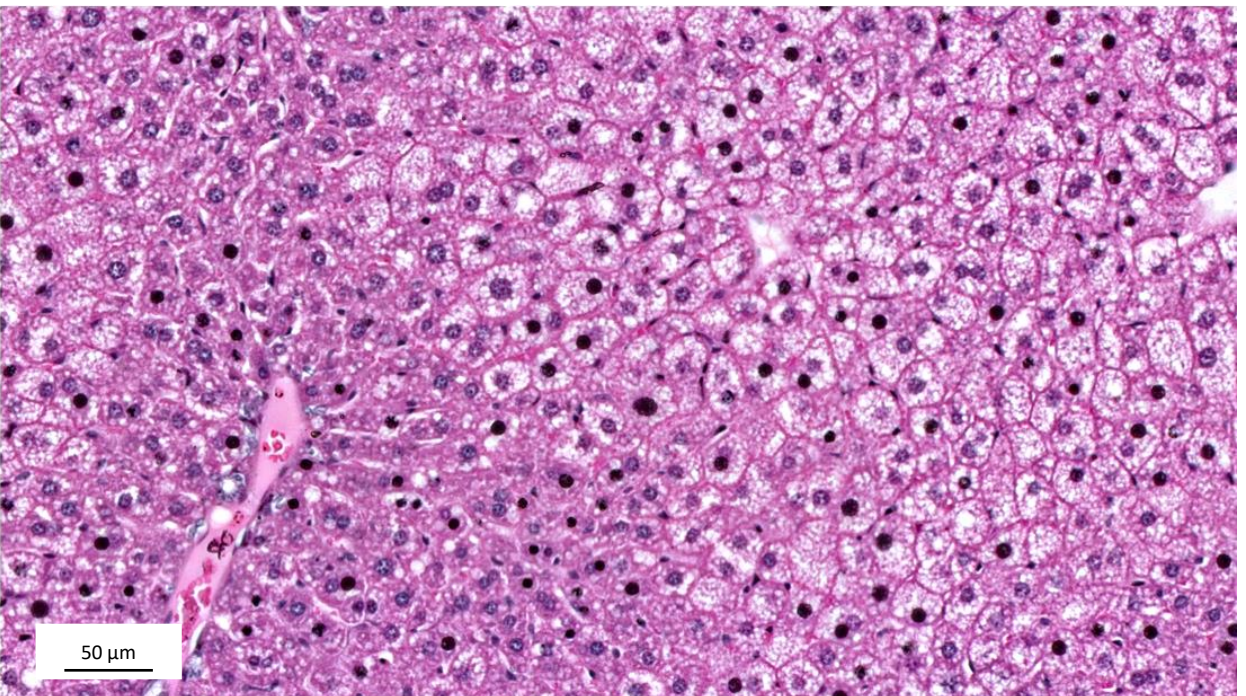



CDHFD-C-14

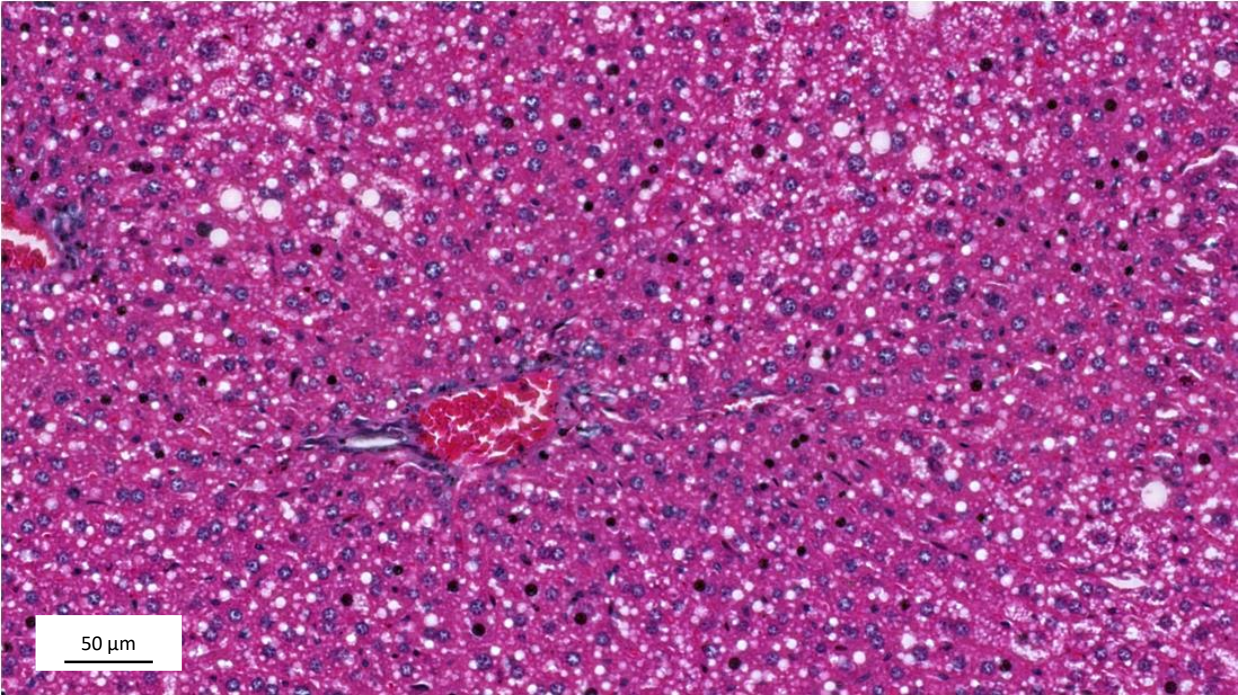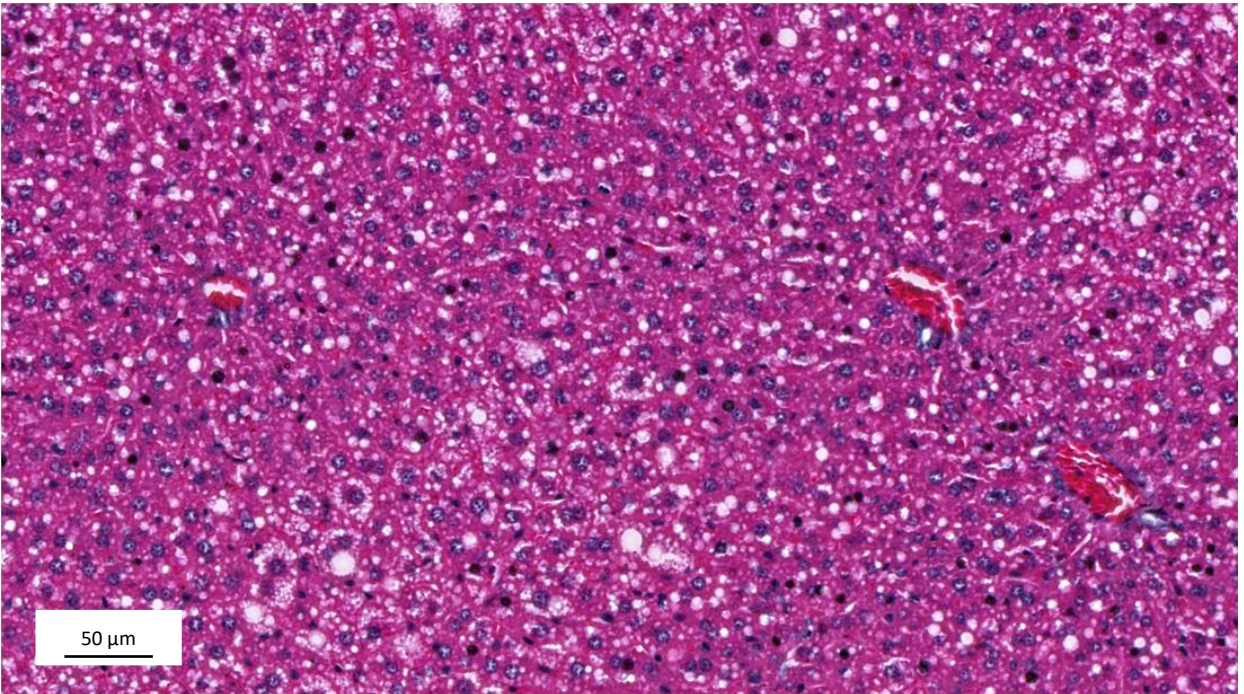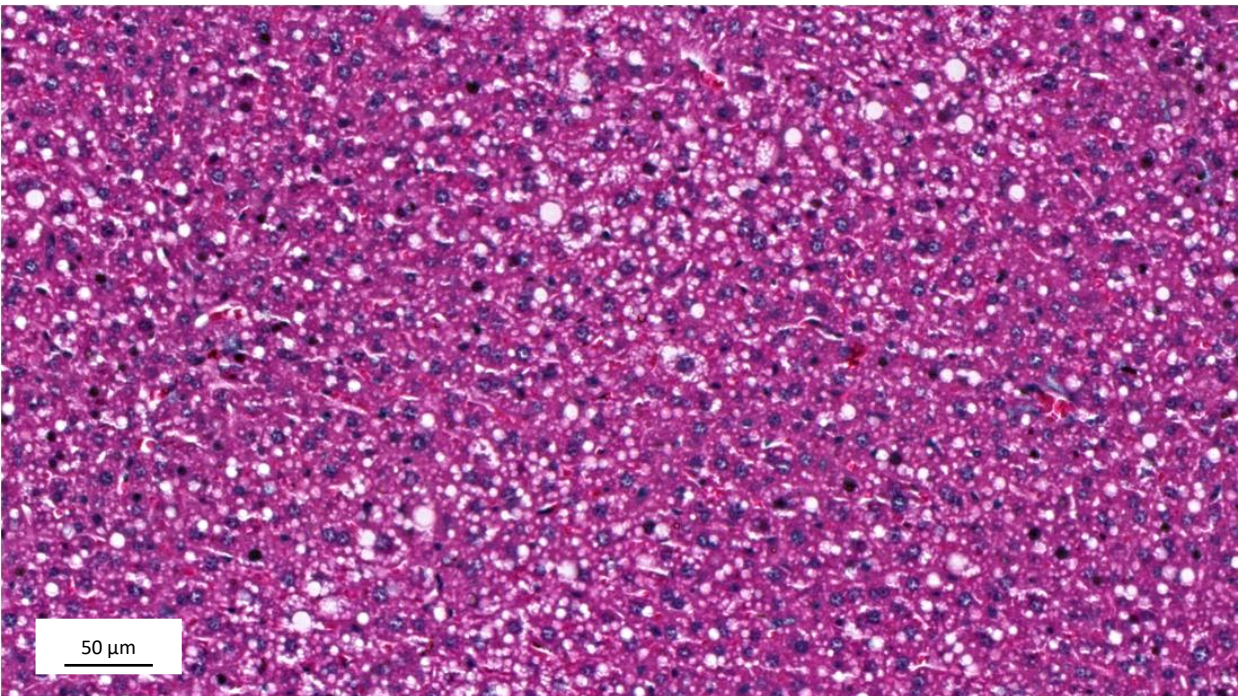

CDHFD-C-15

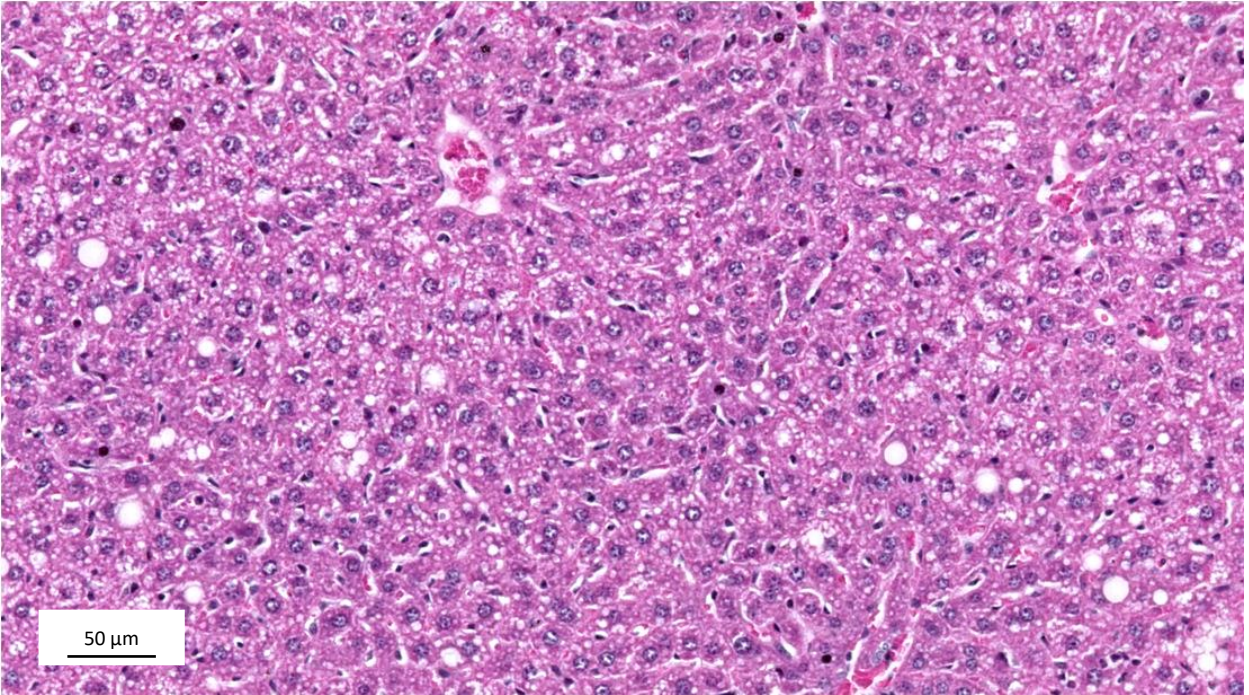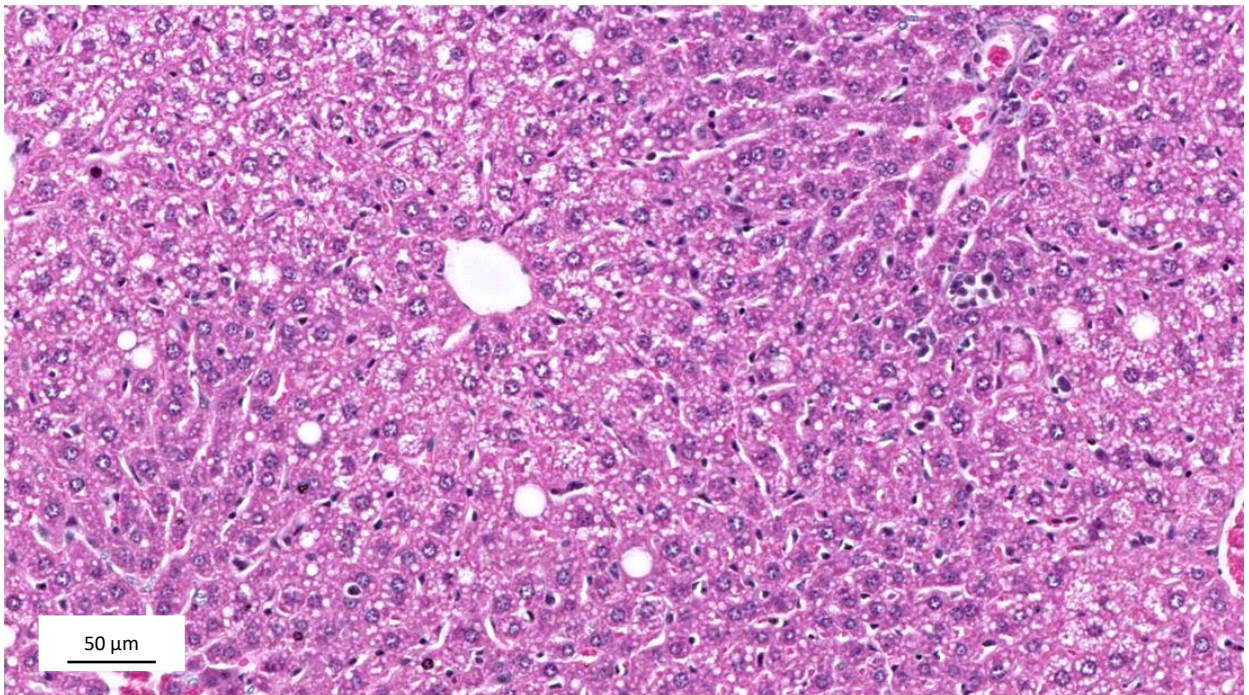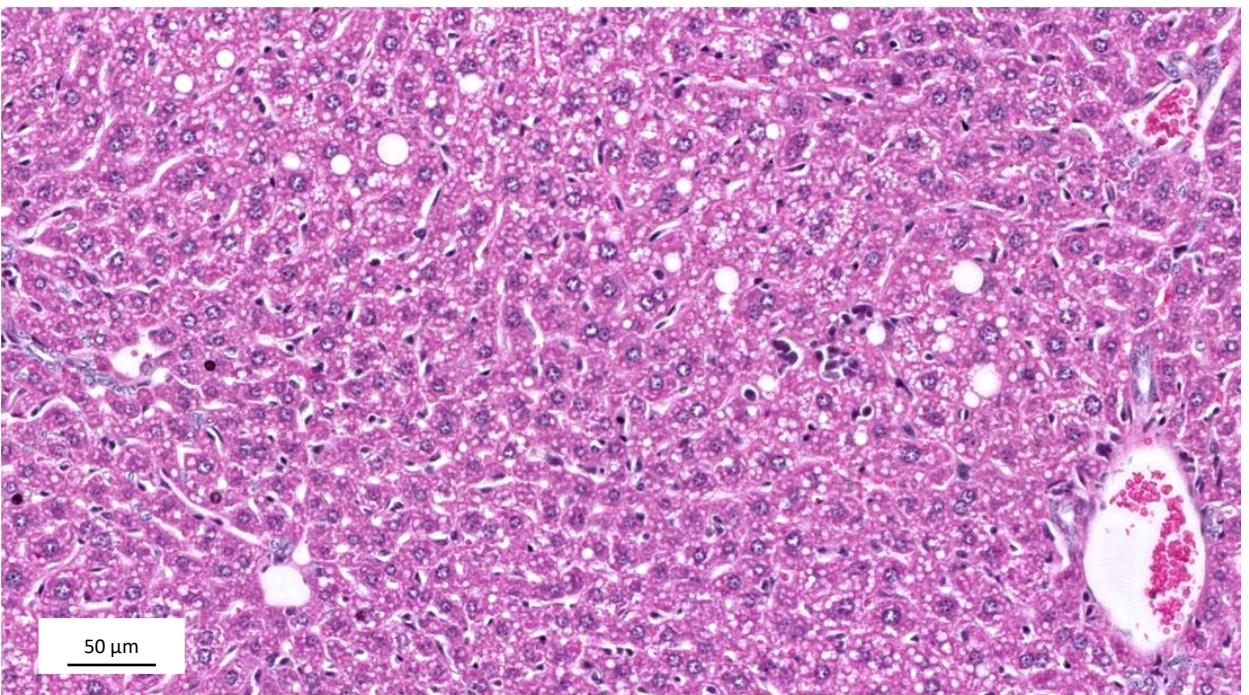

## **Sirius red Staining**

**NCD group**

(10 mice were included)

# NCD-1

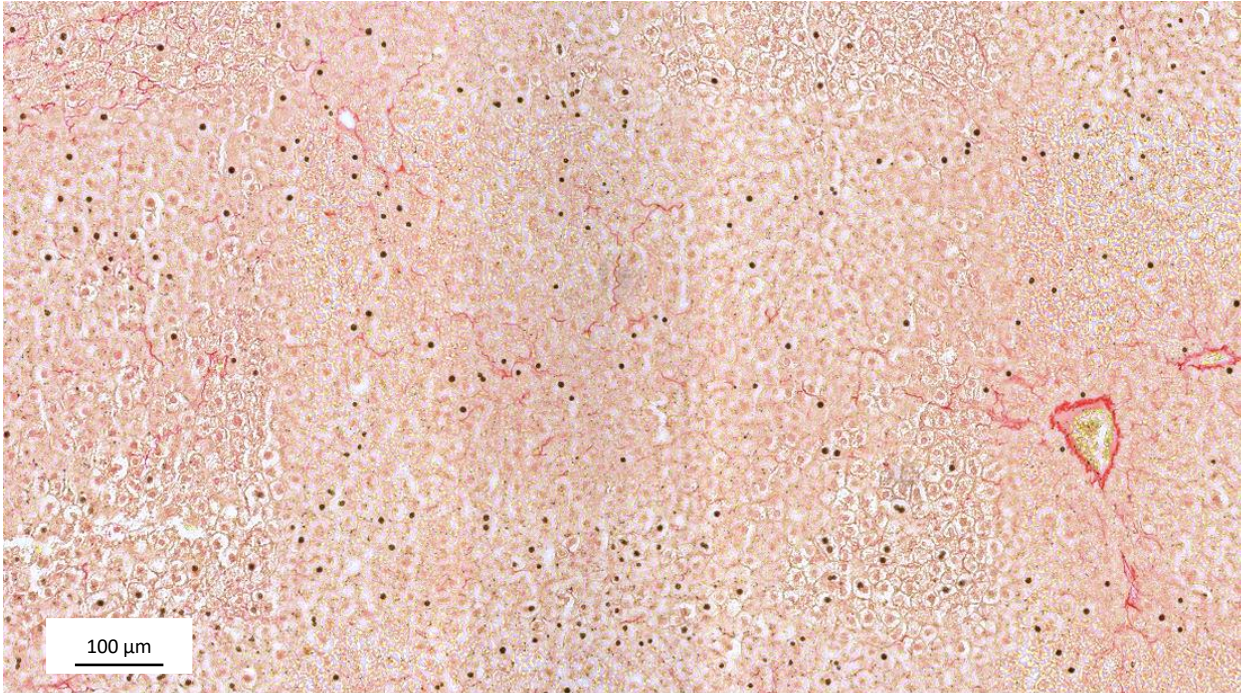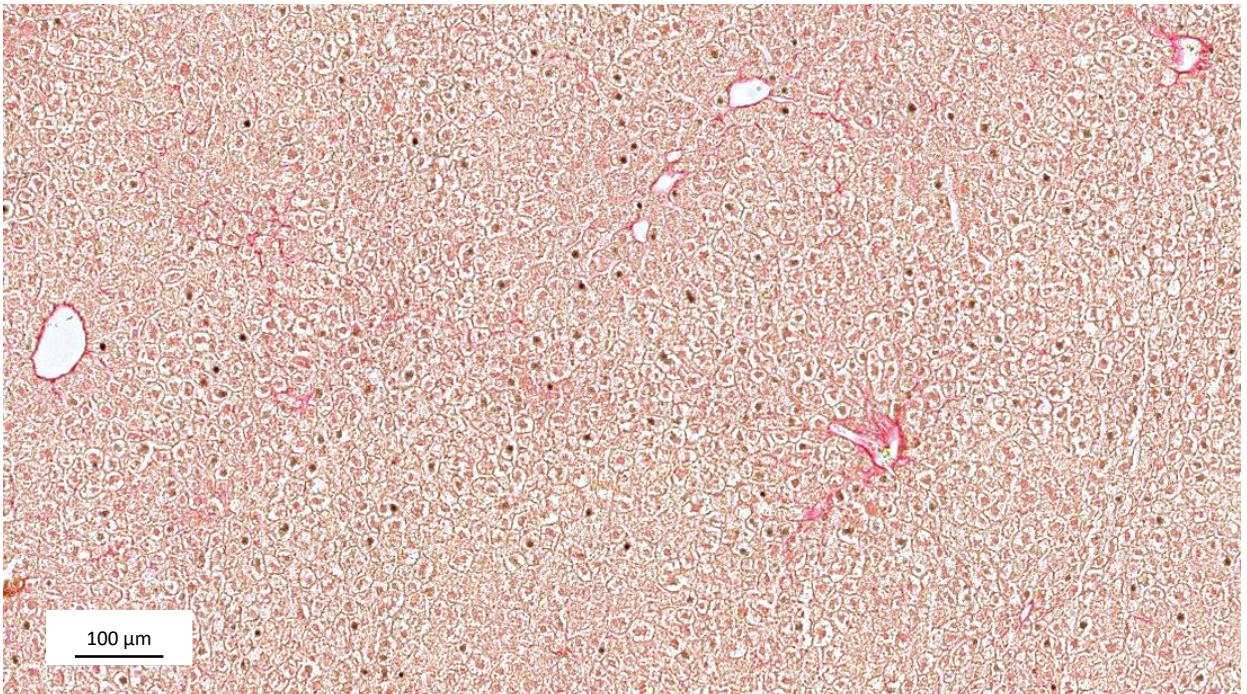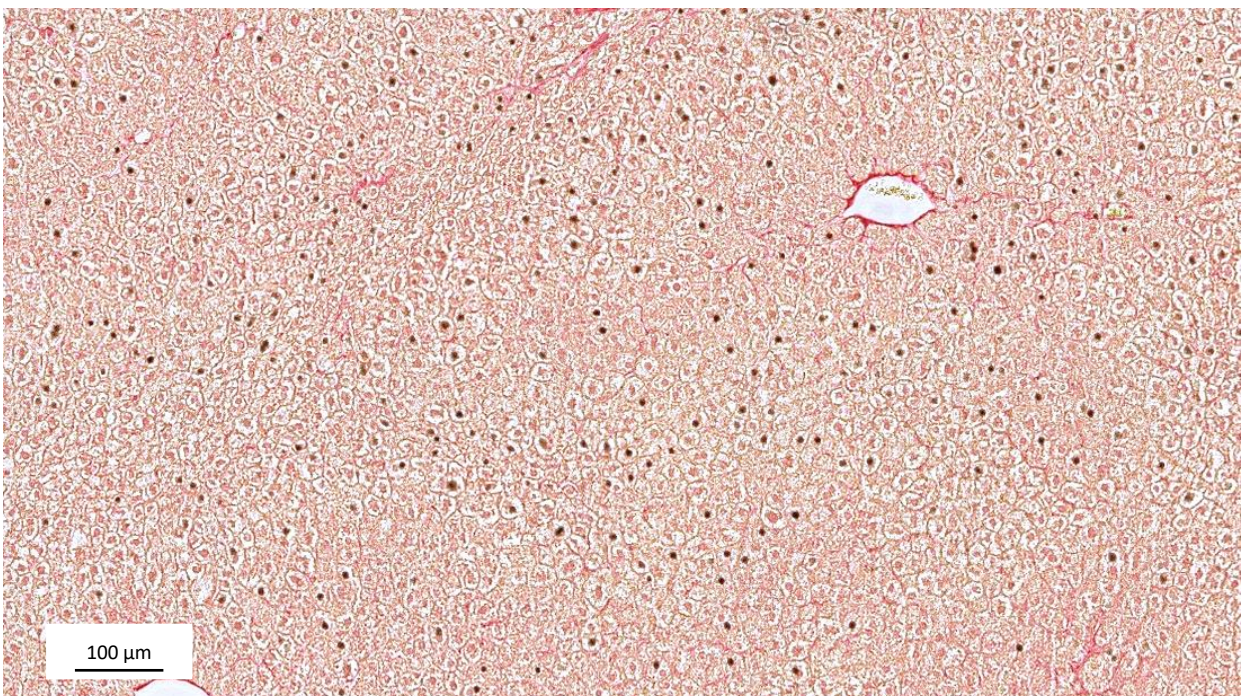

# NCD-2

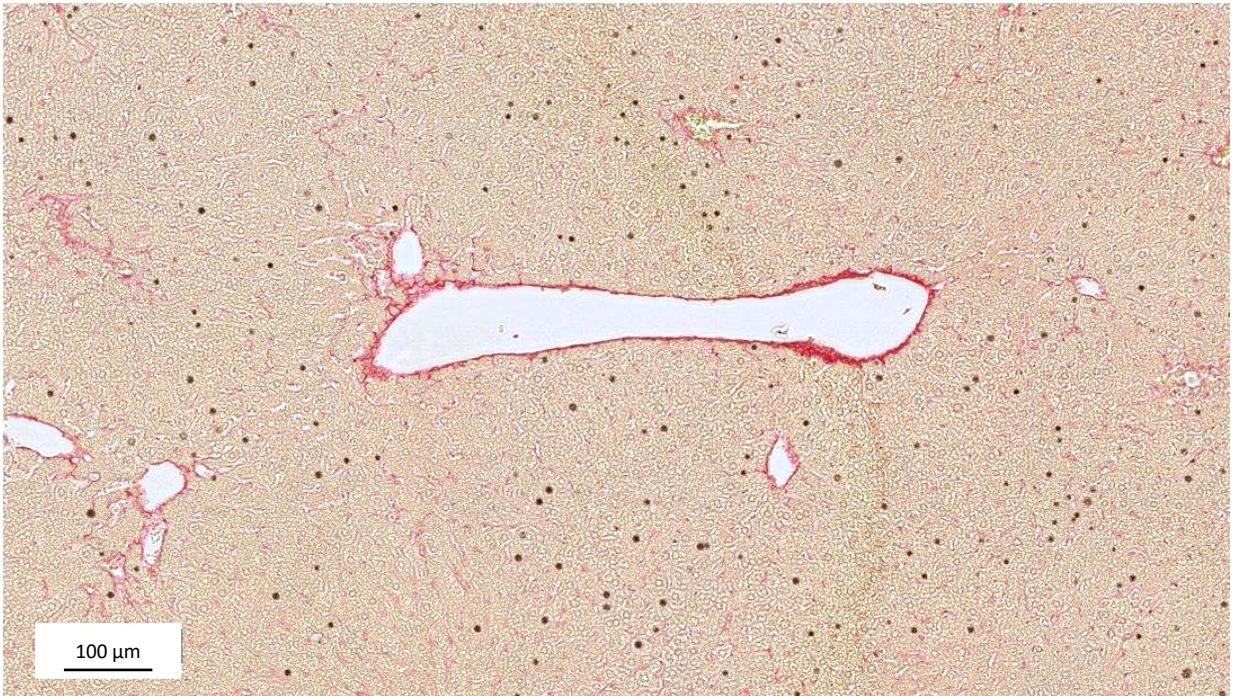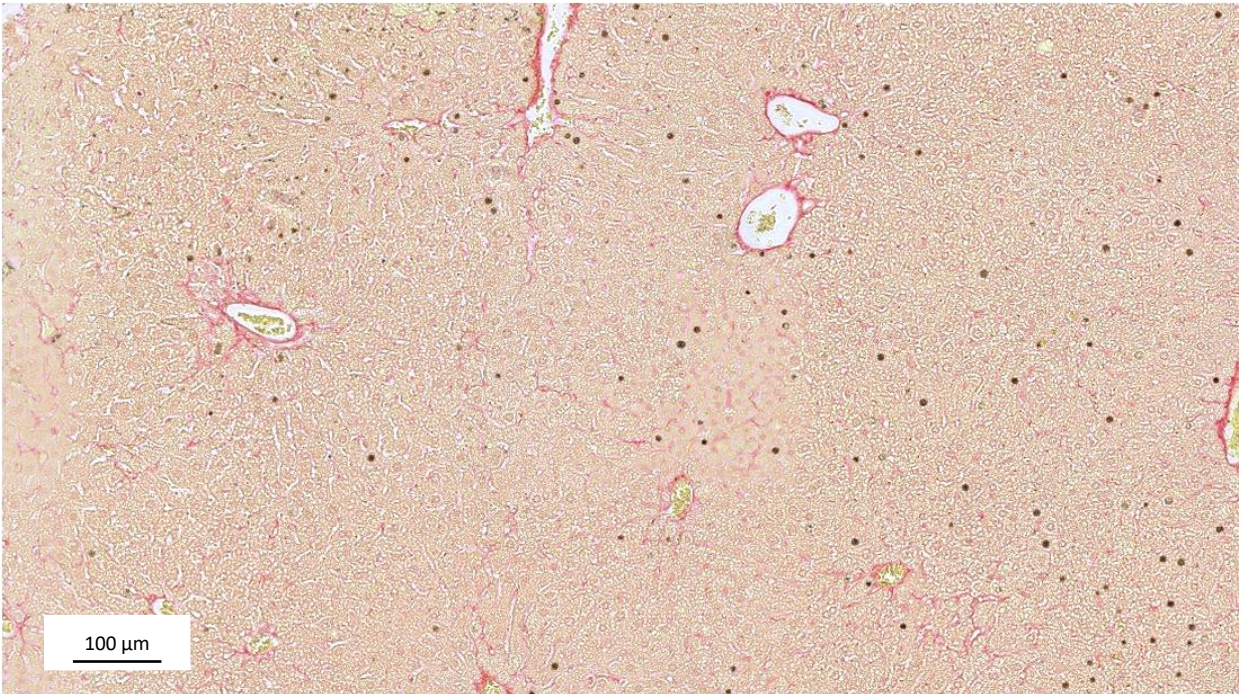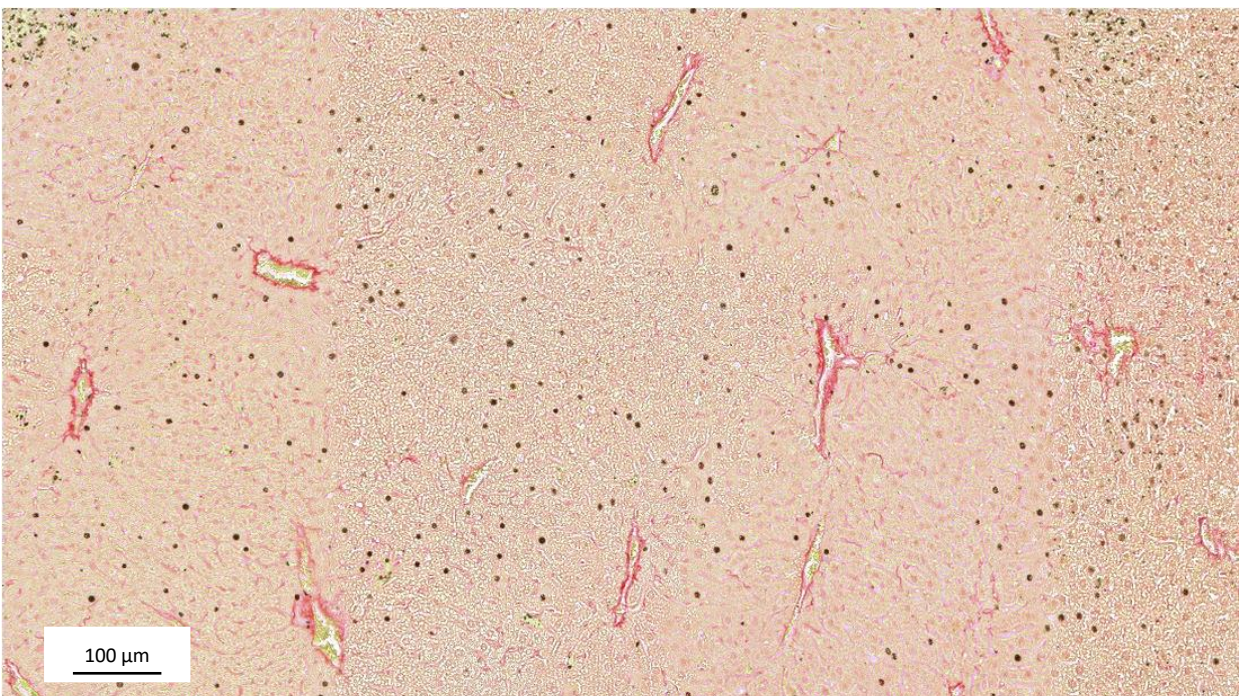

# NCD-3

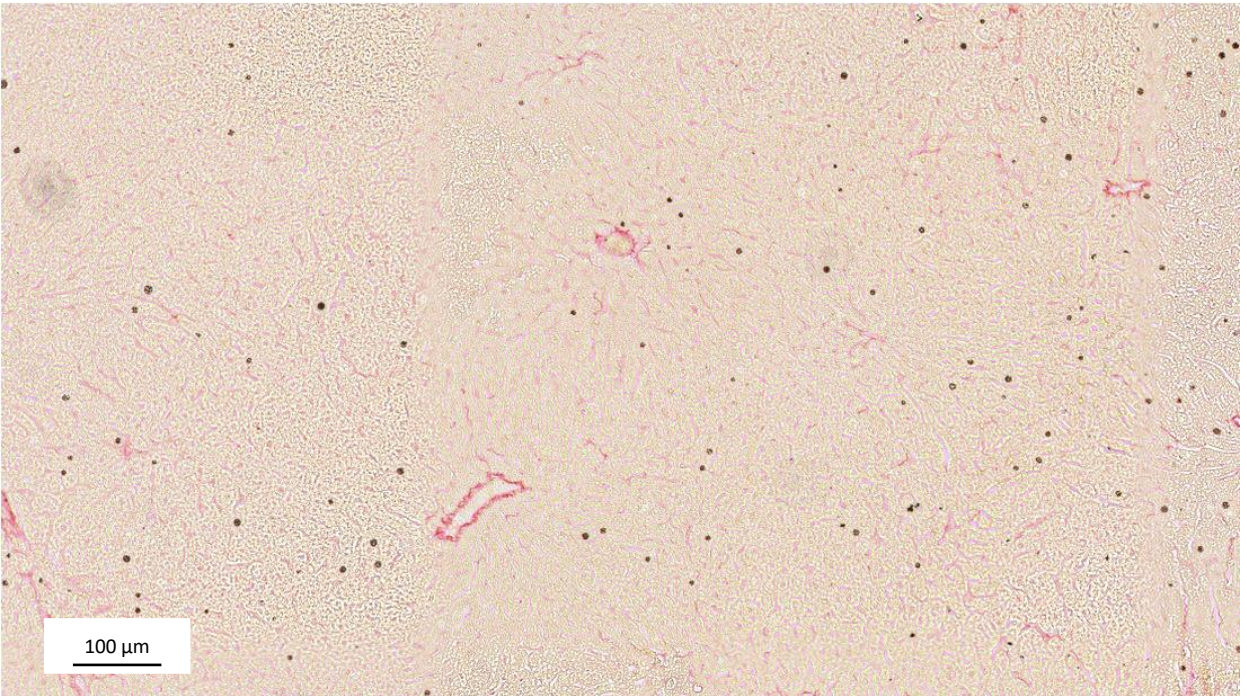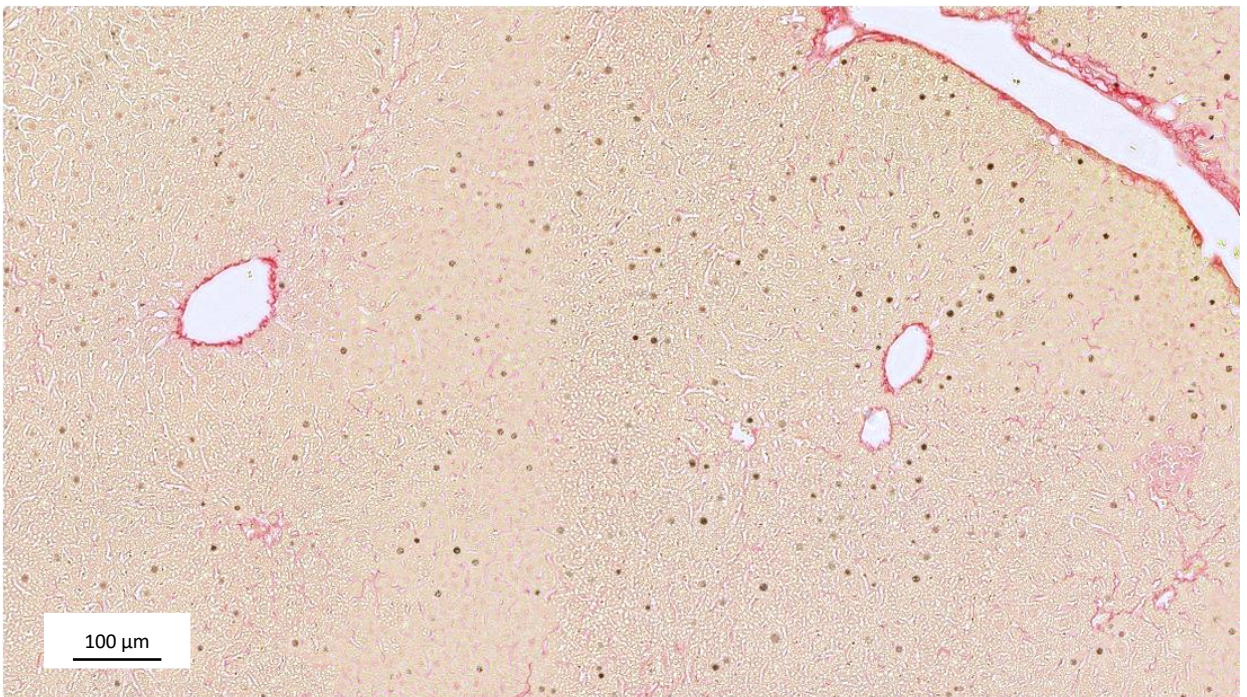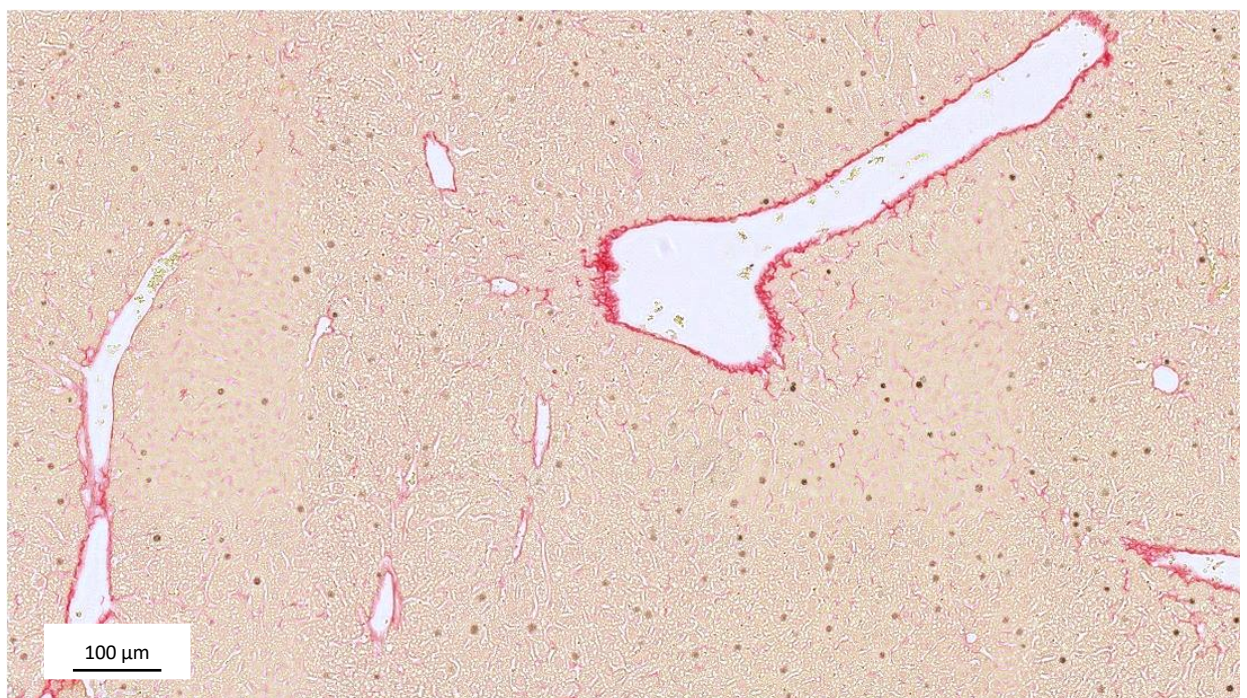

# NCD-4

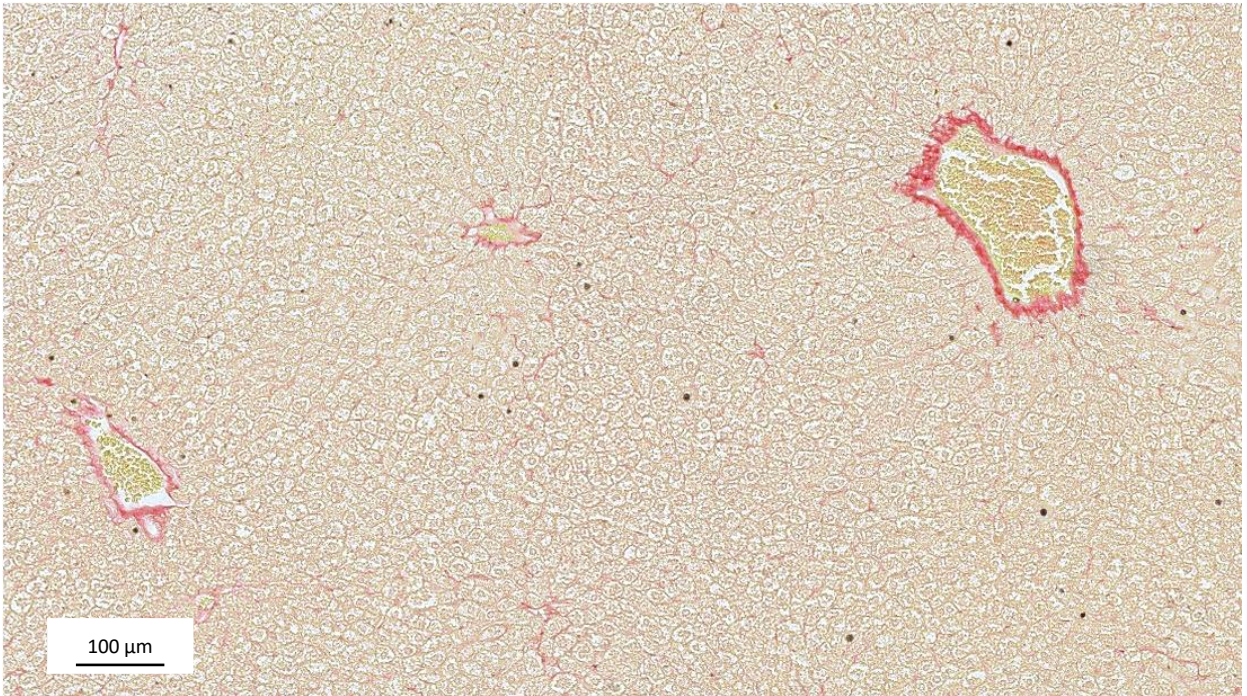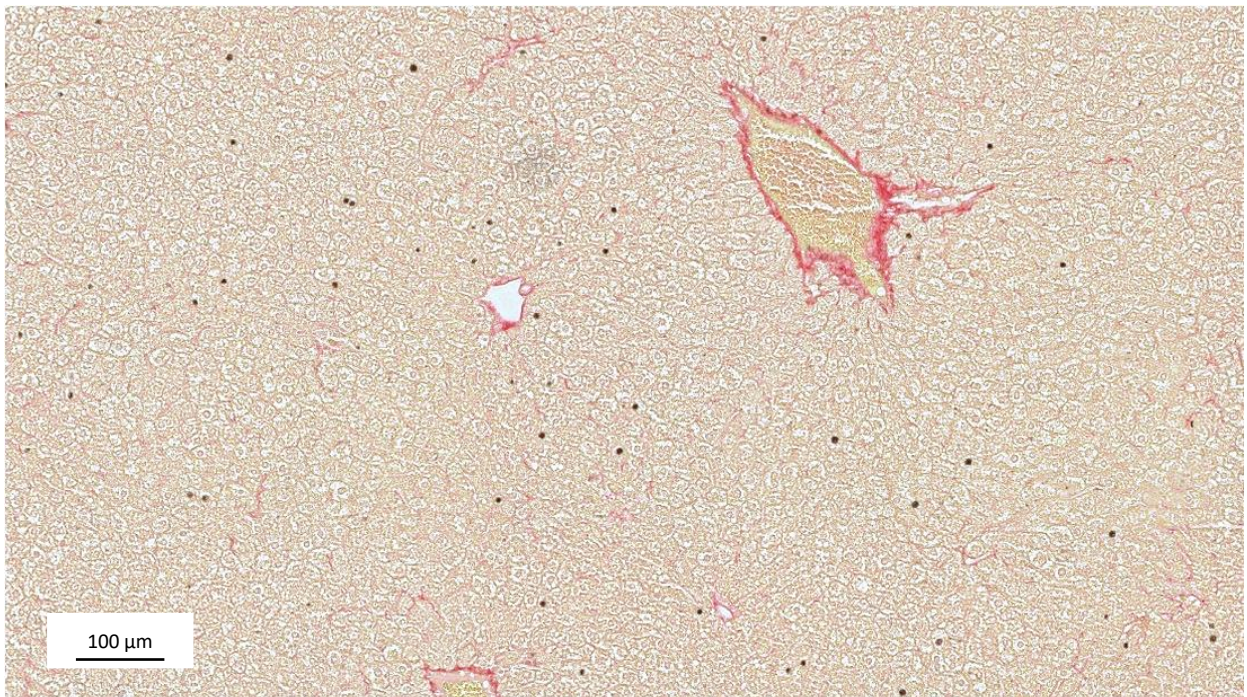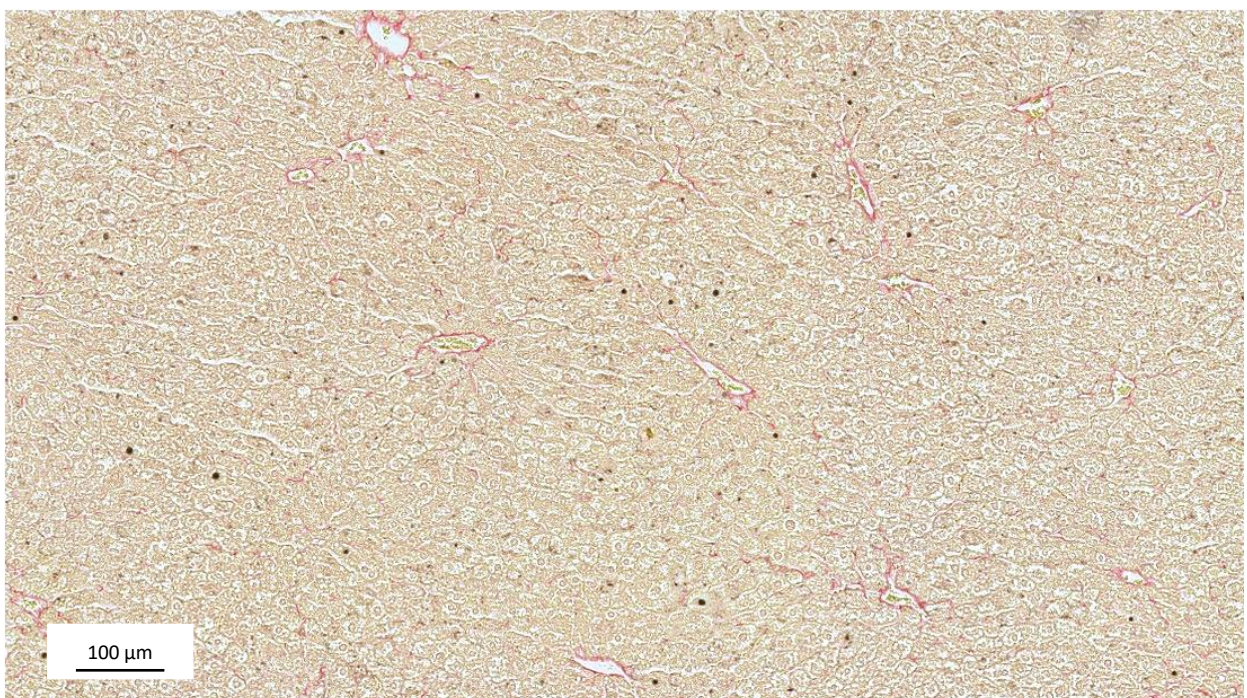

# NCD-5

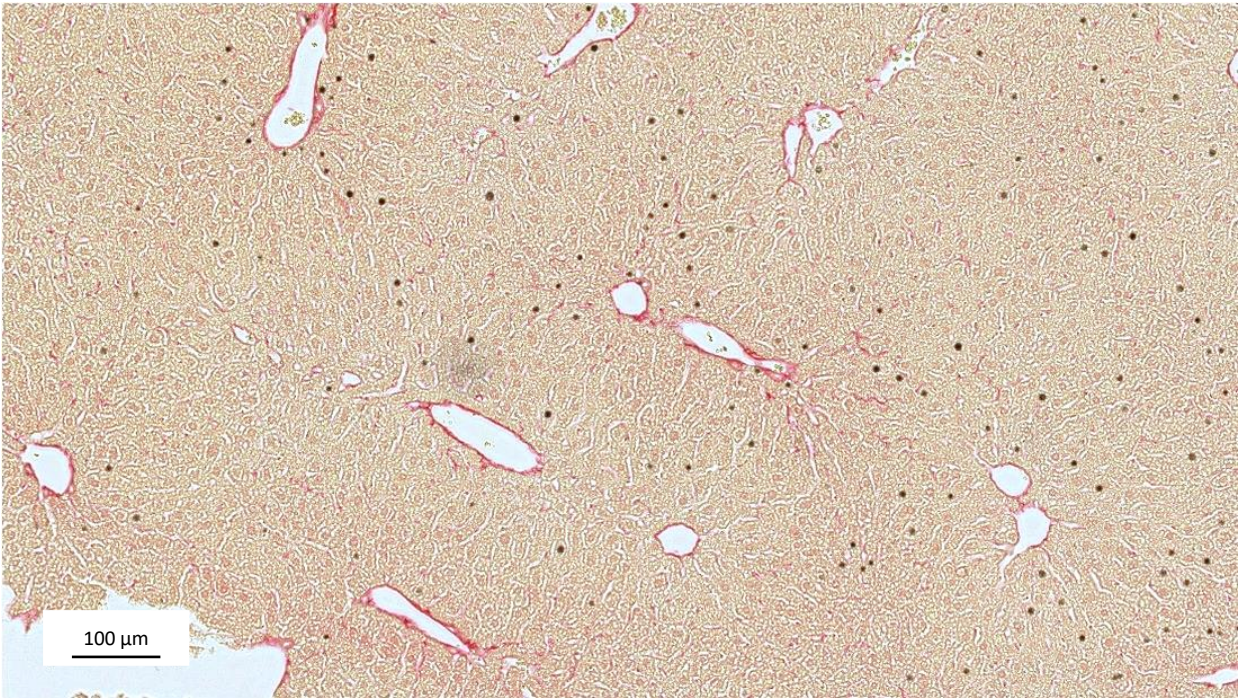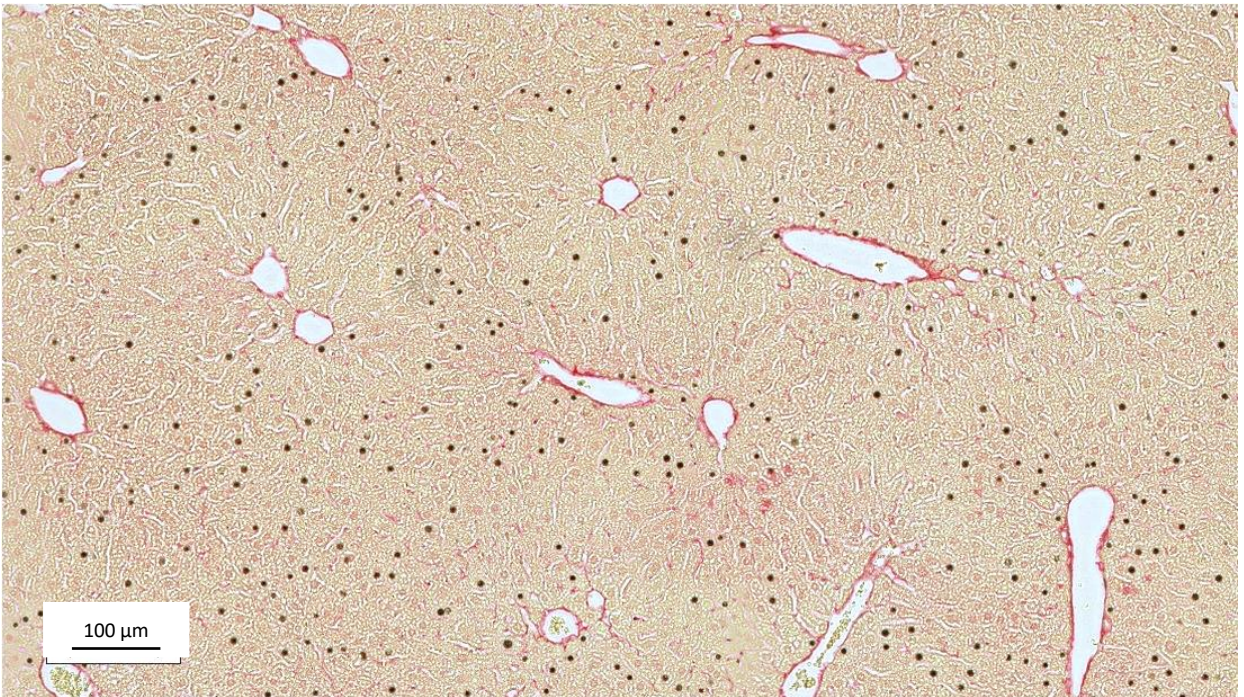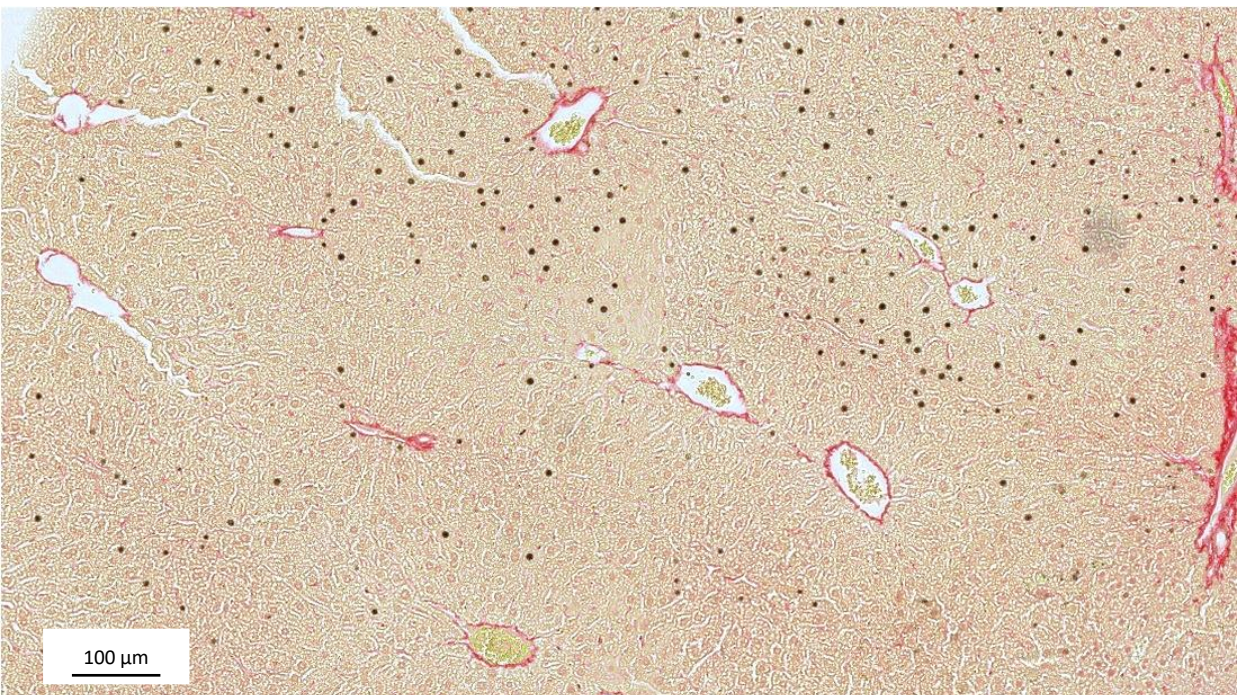



# NCD-6

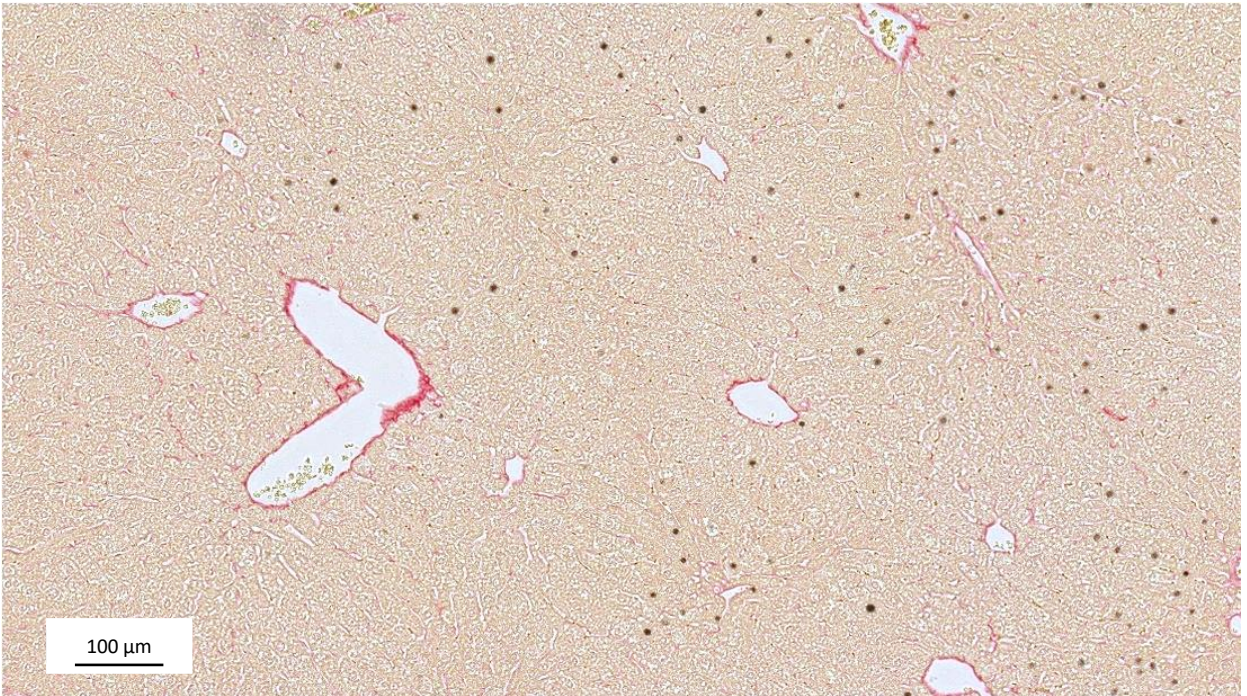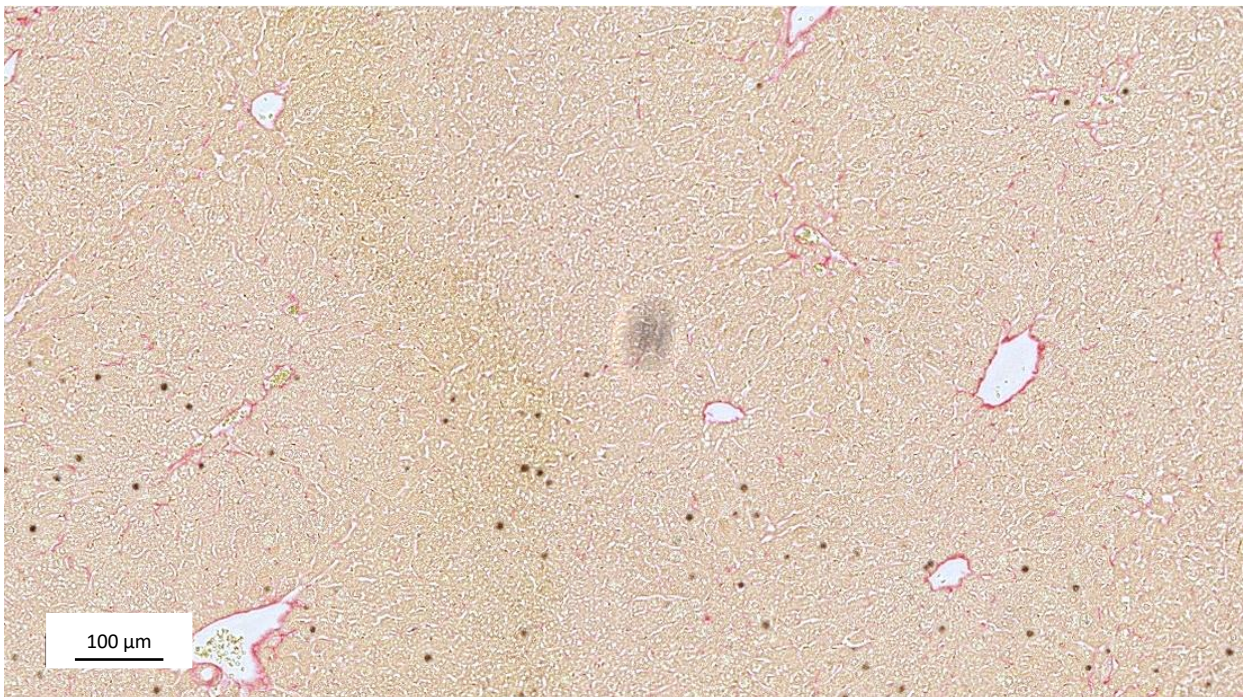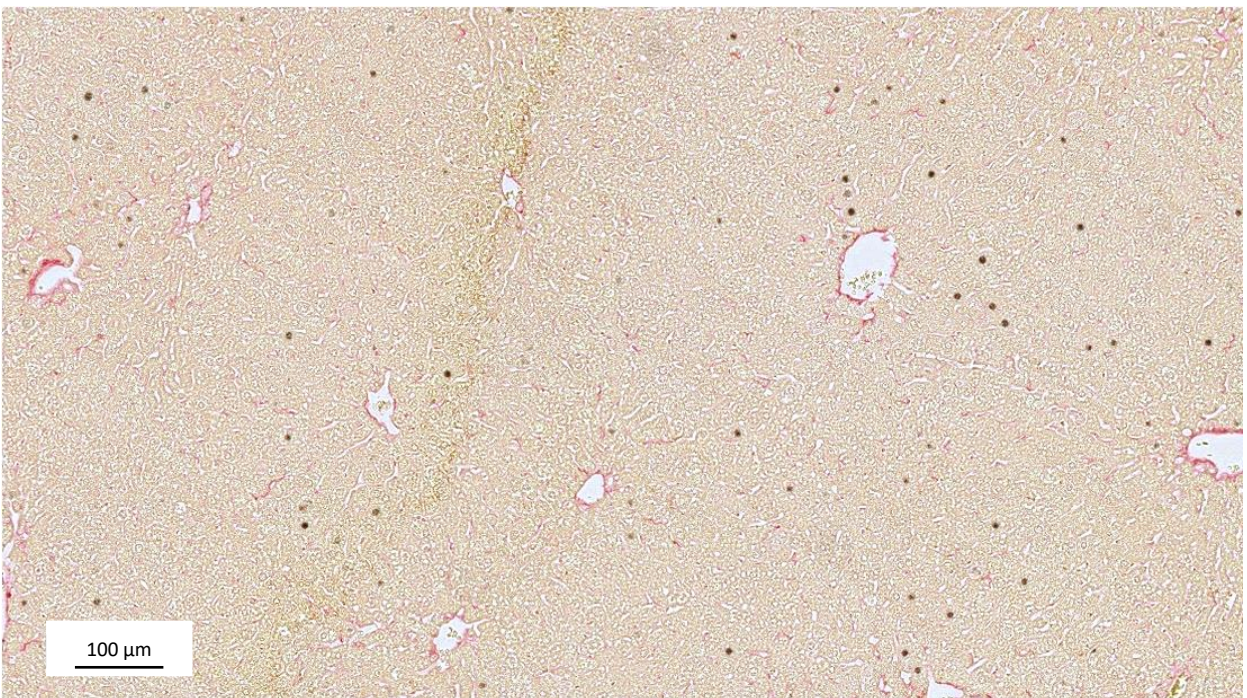

# NCD-7

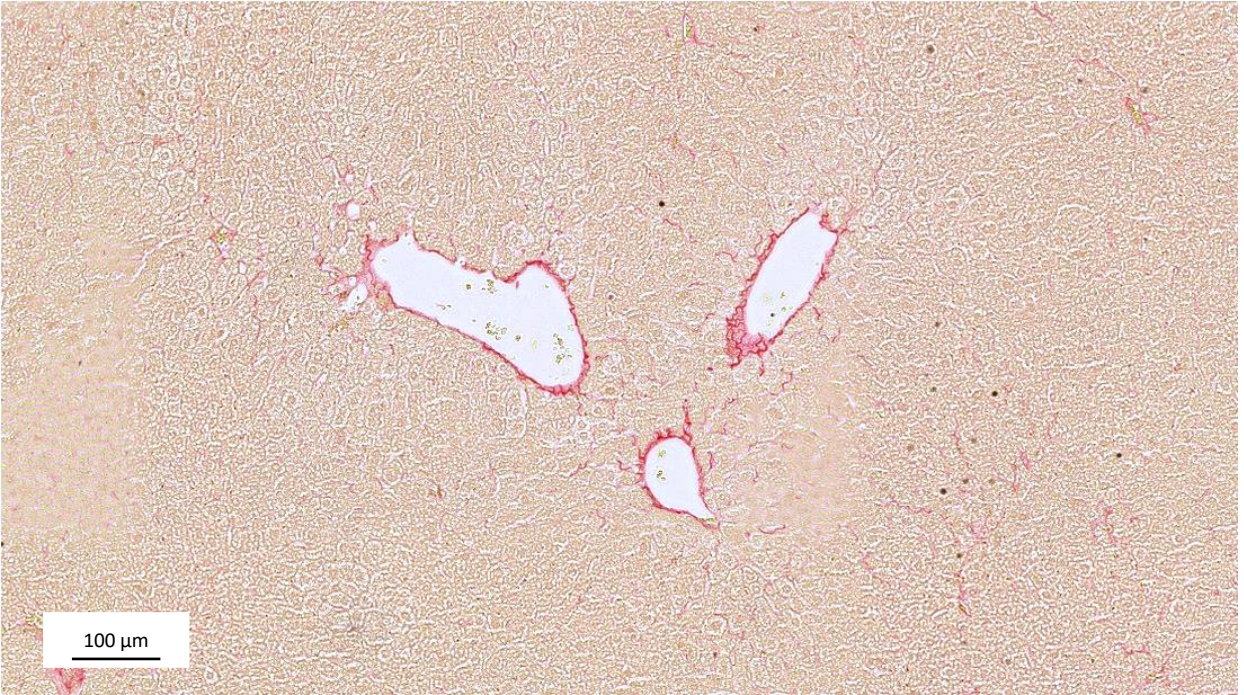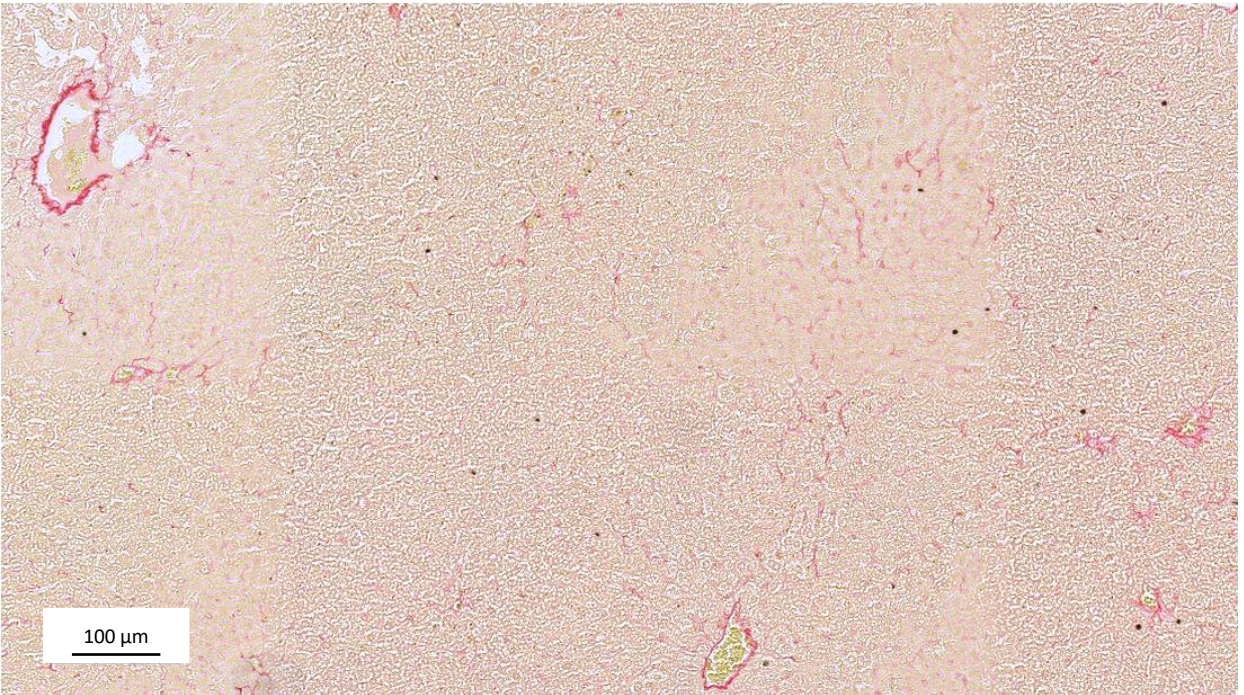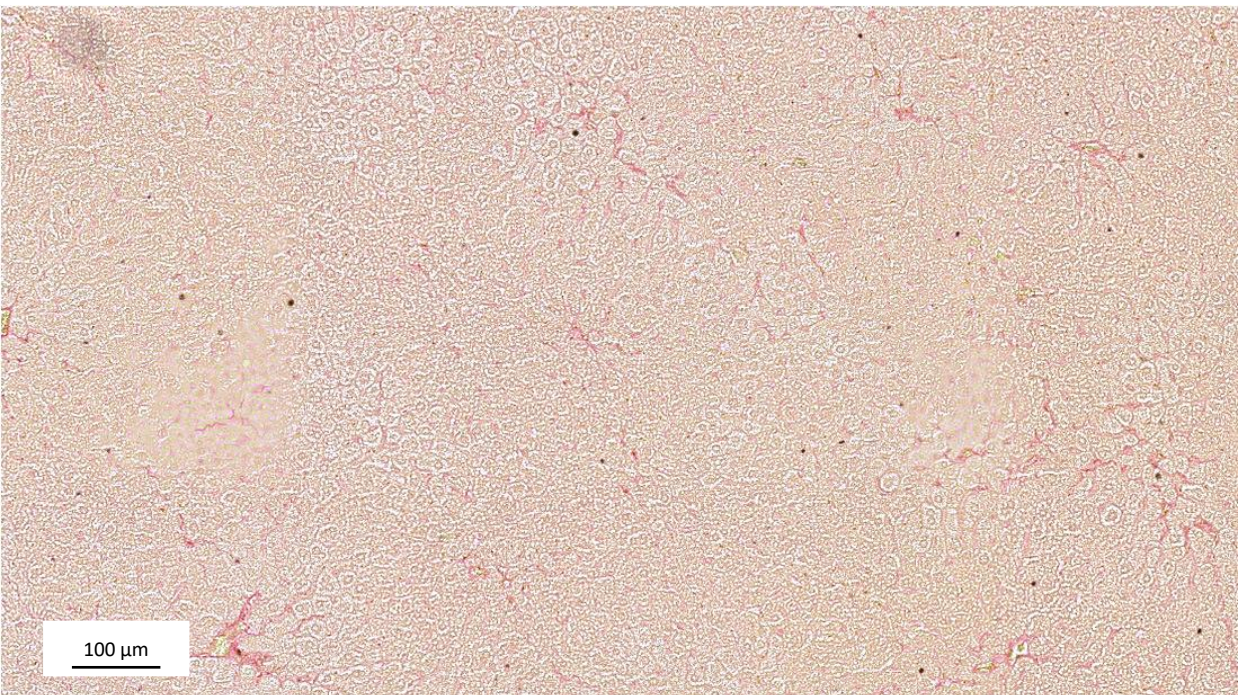

# NCD-8

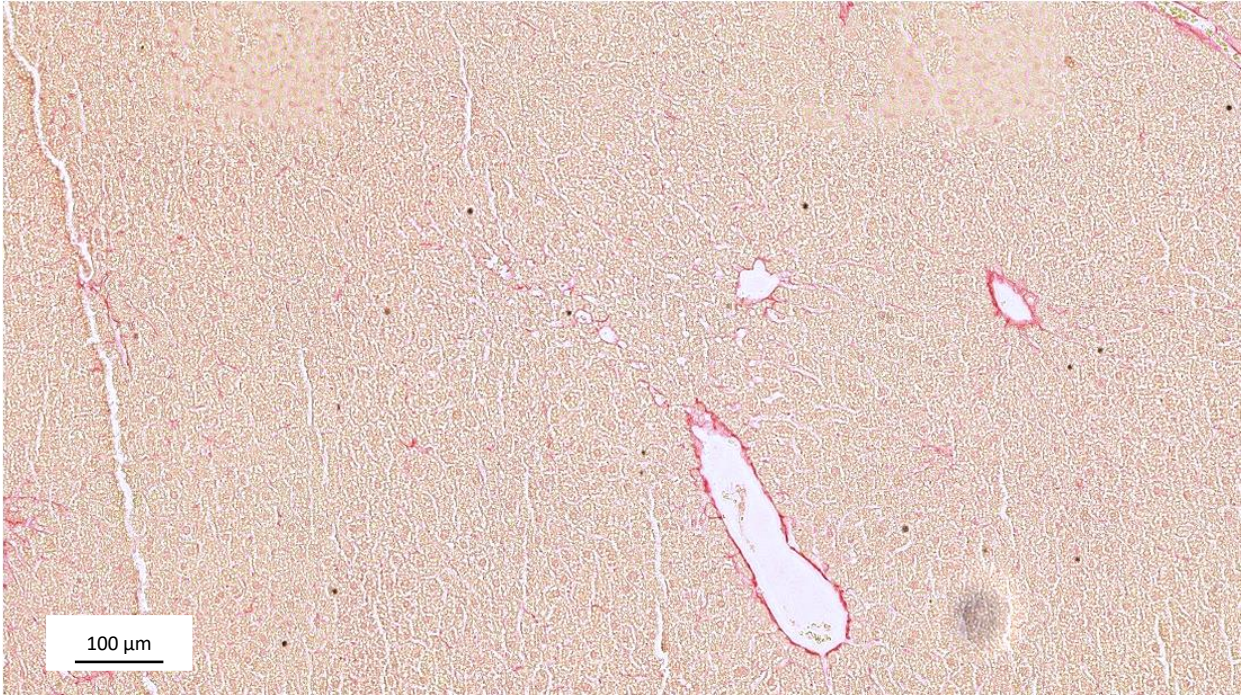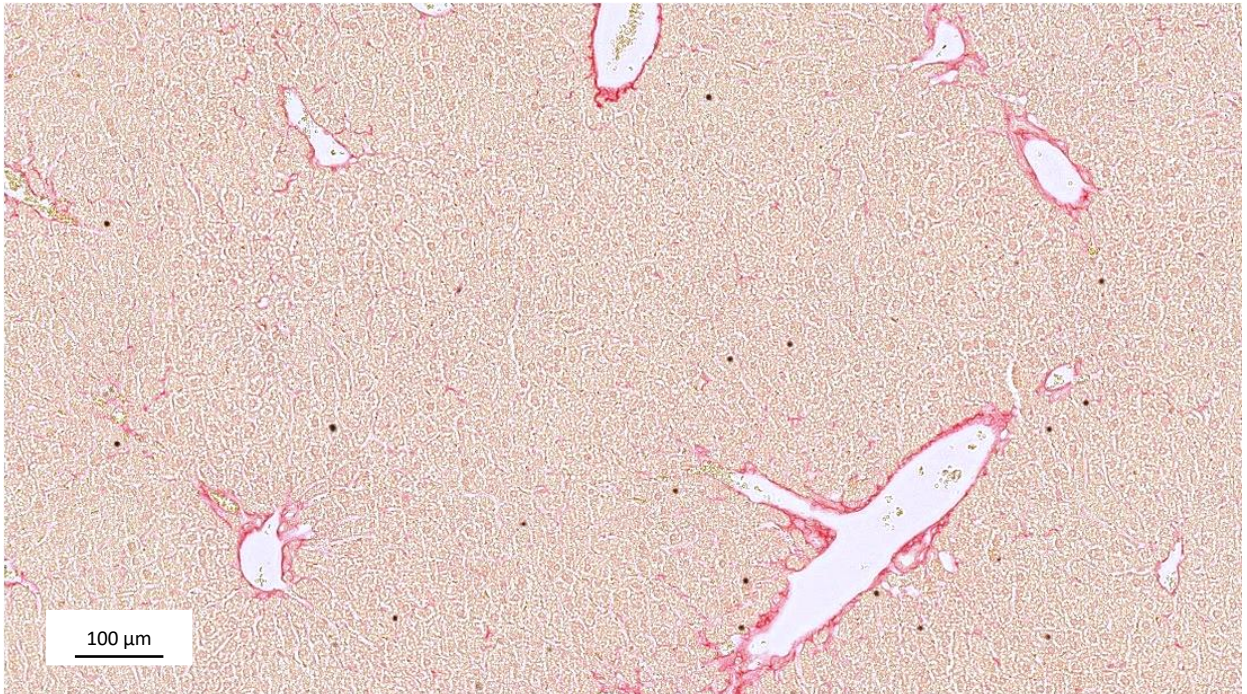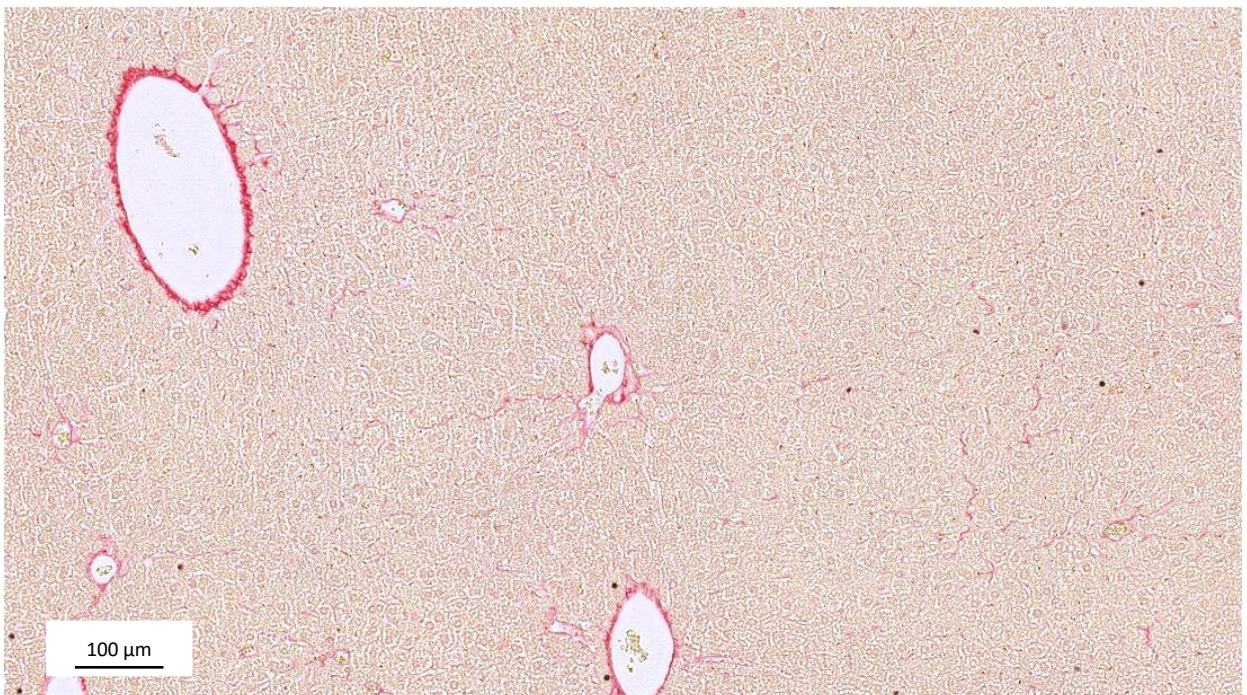

# NCD-9

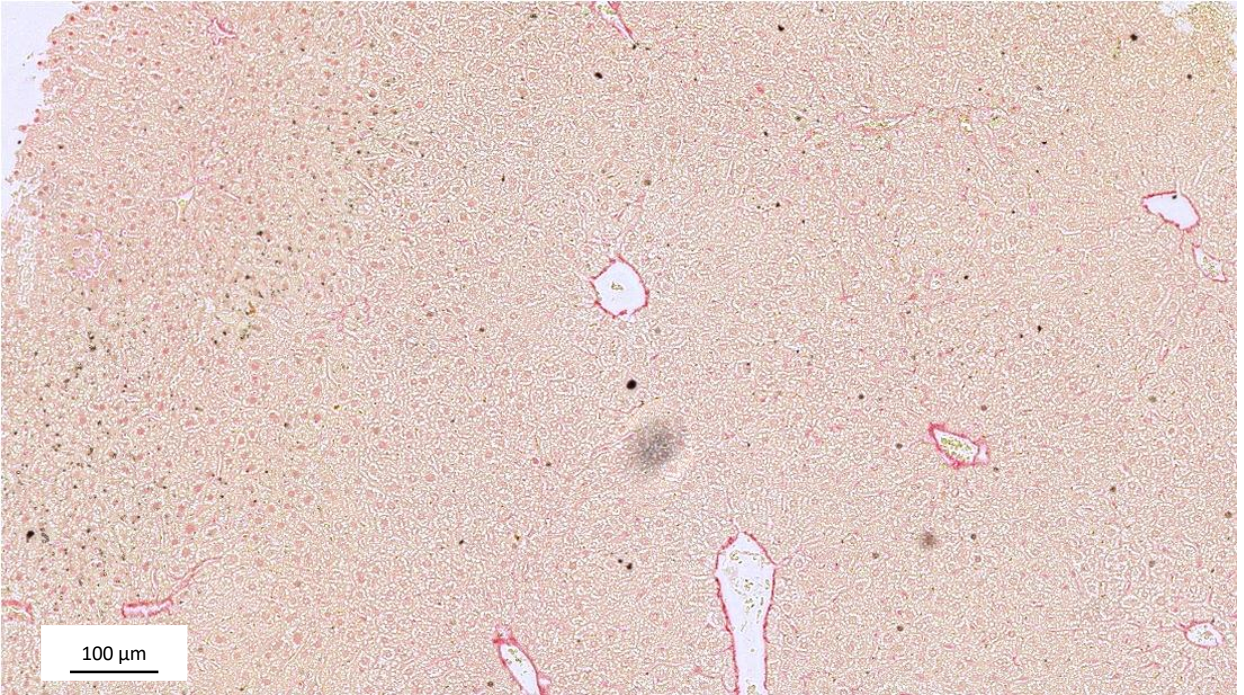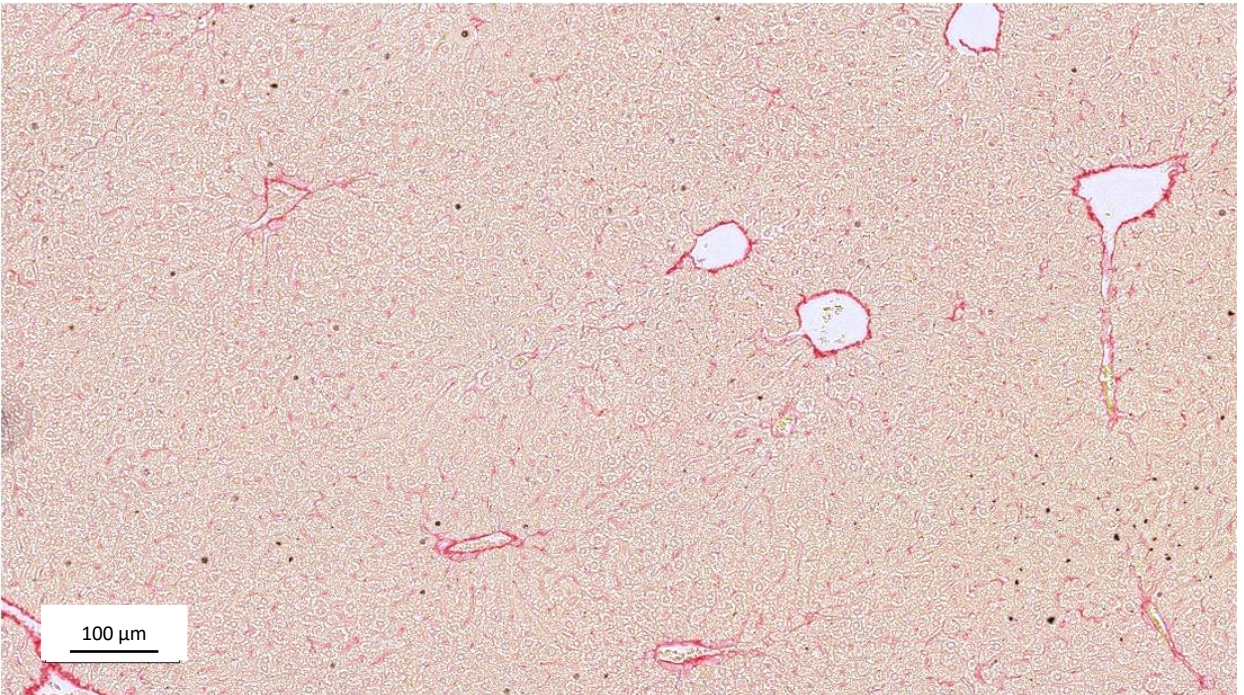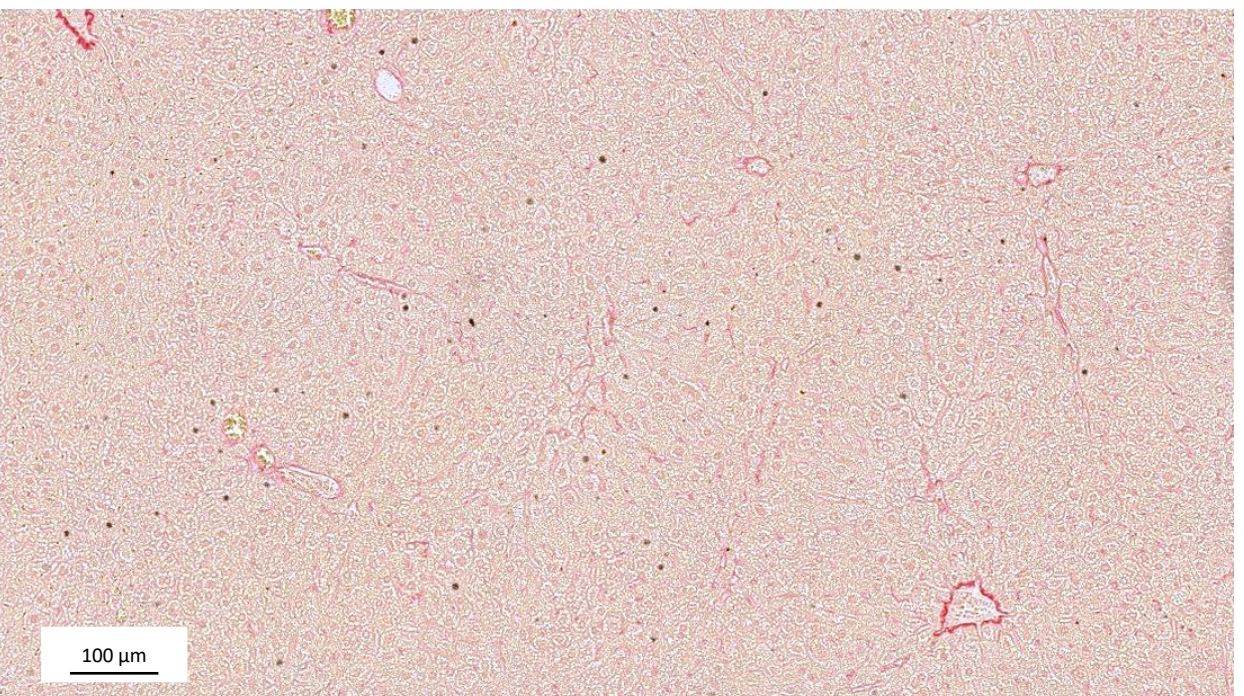

# NCD-10

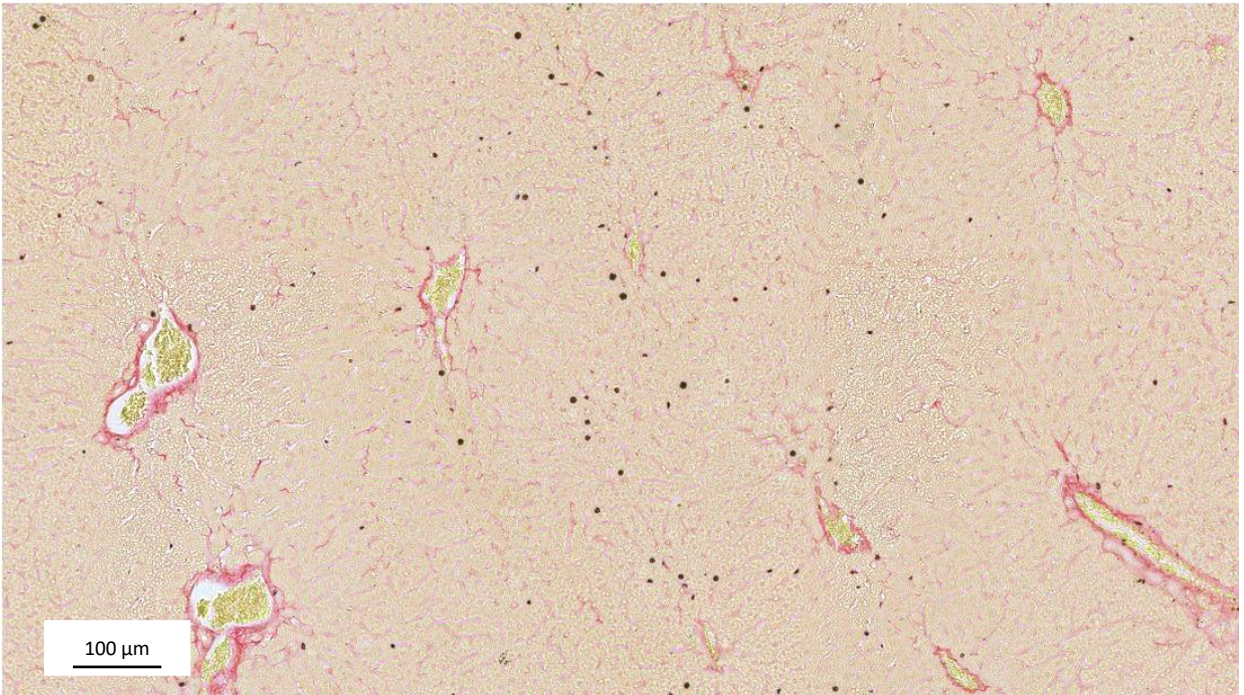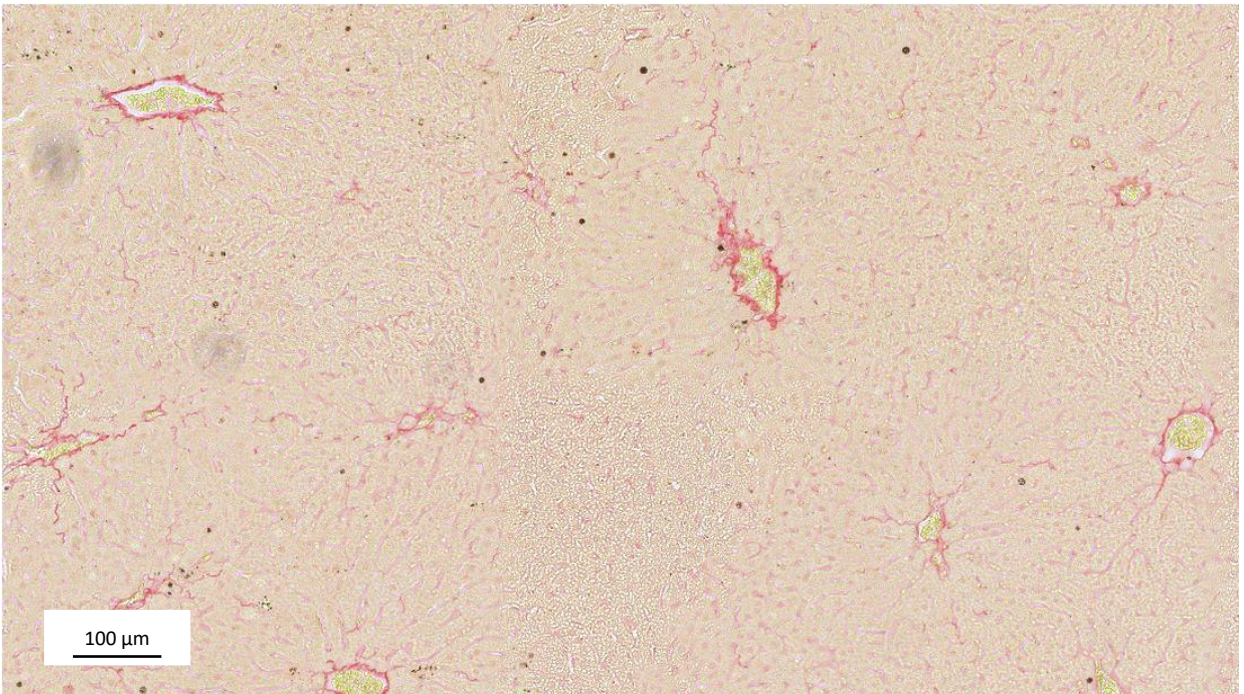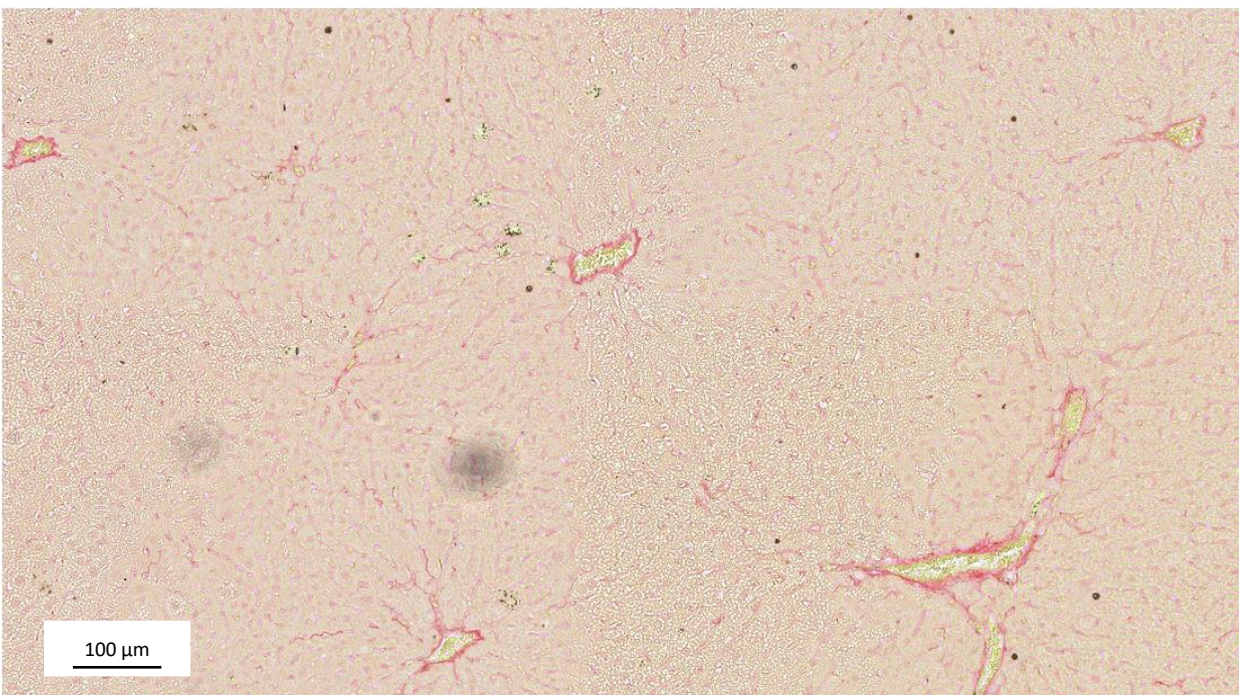

## **Sirius red Staining**

**CDHFD group**

(13 mice were included)

# CDHFD-1

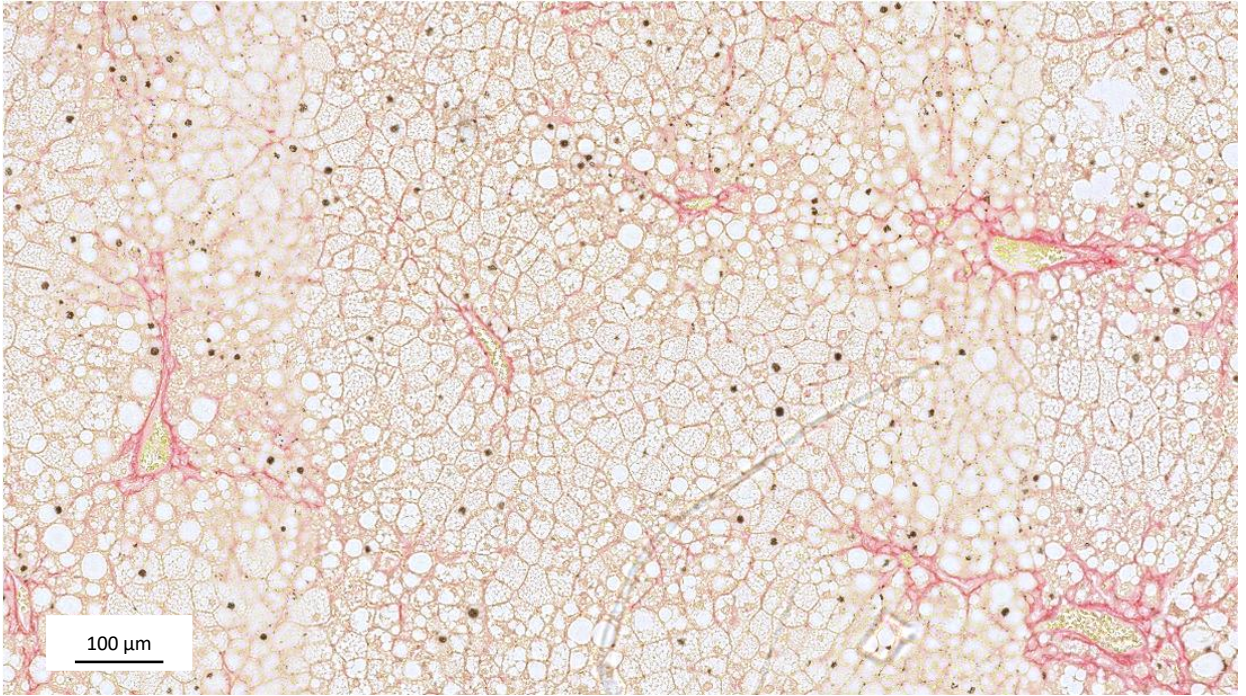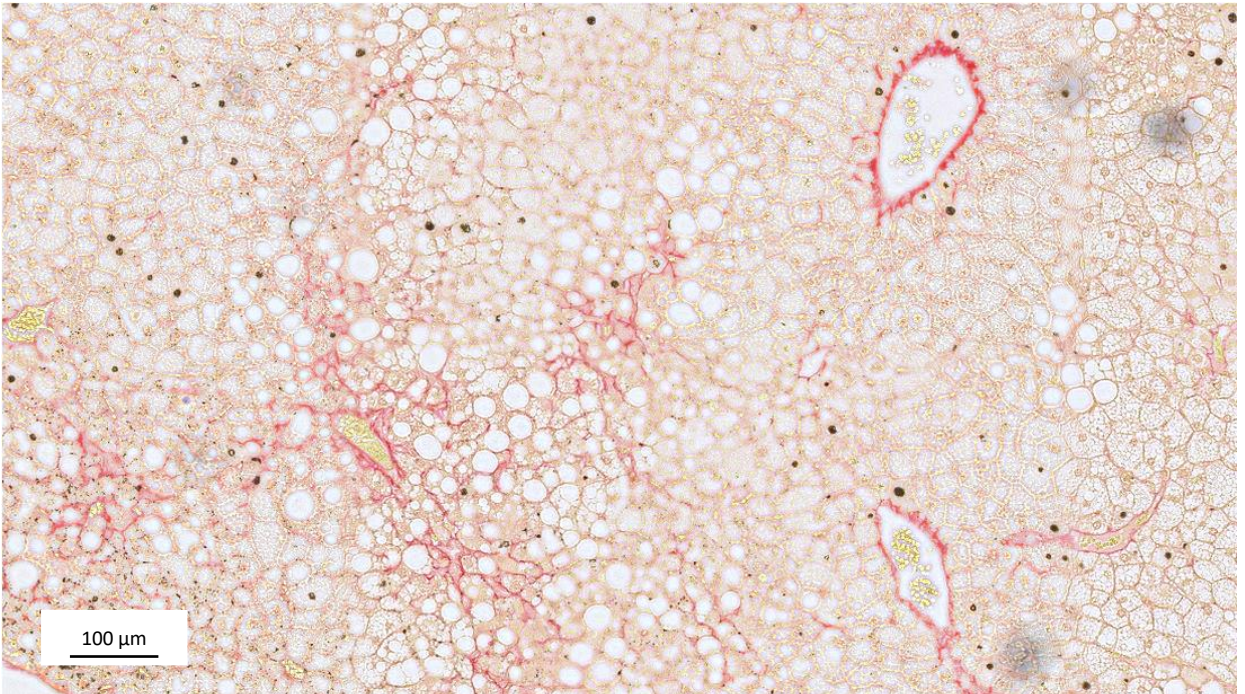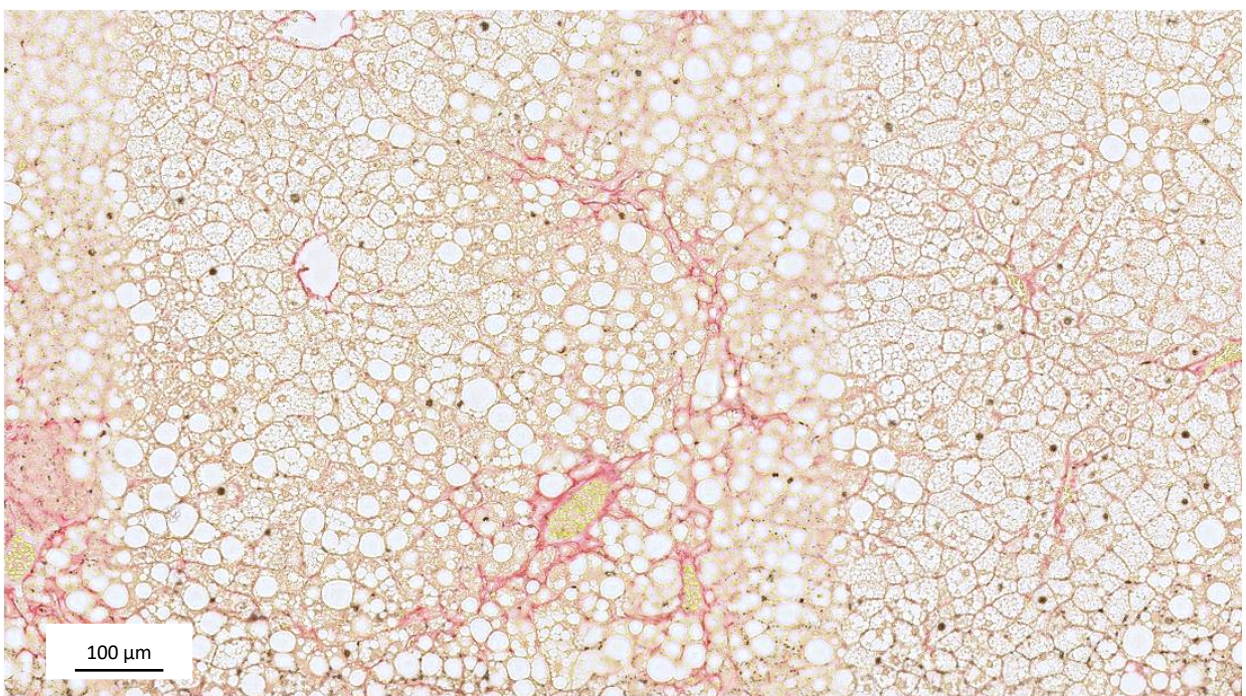

# CDHFD-2

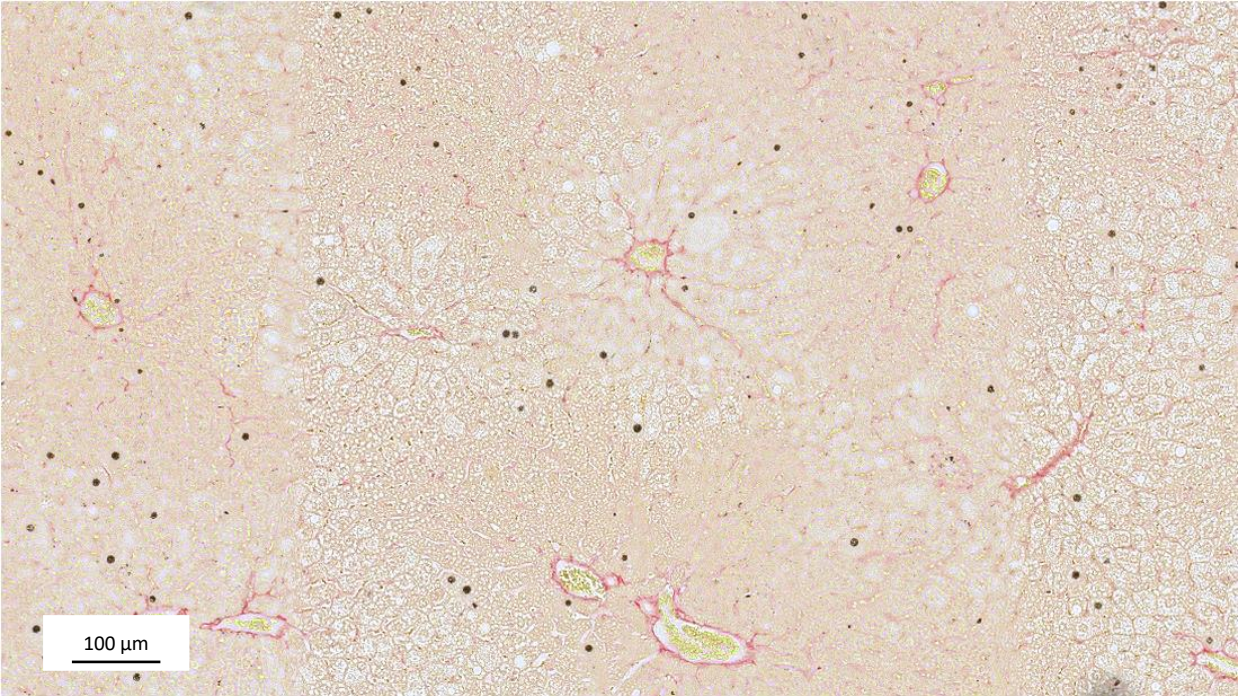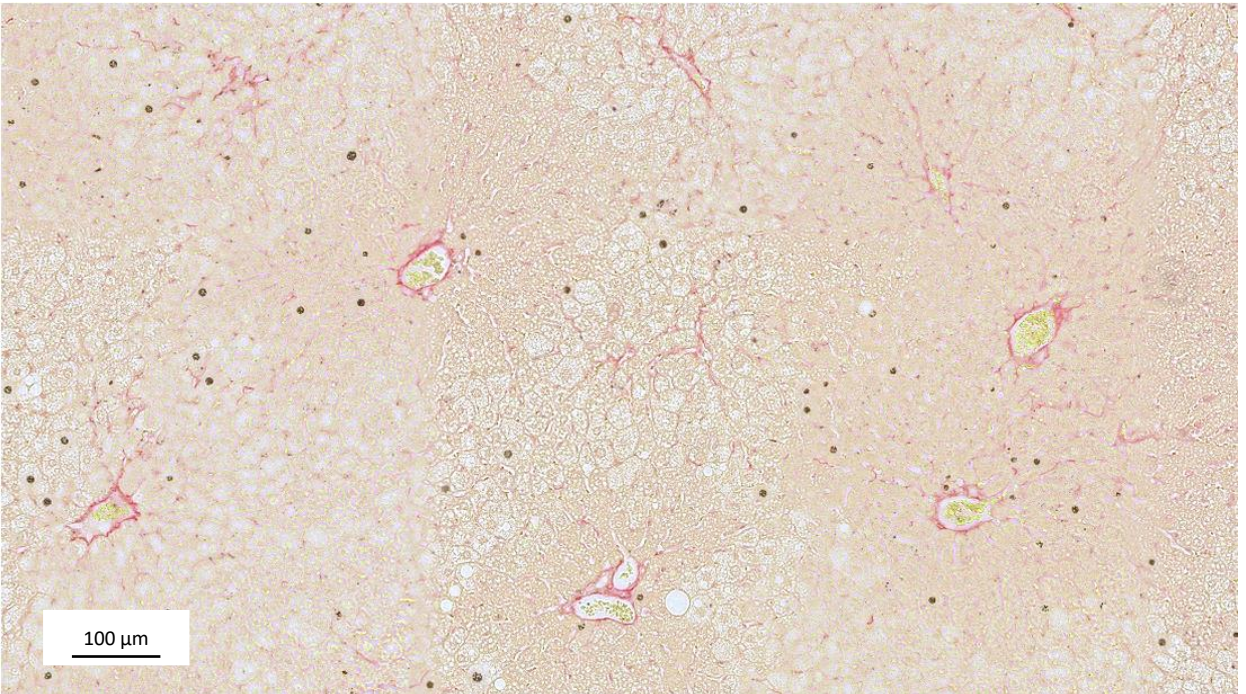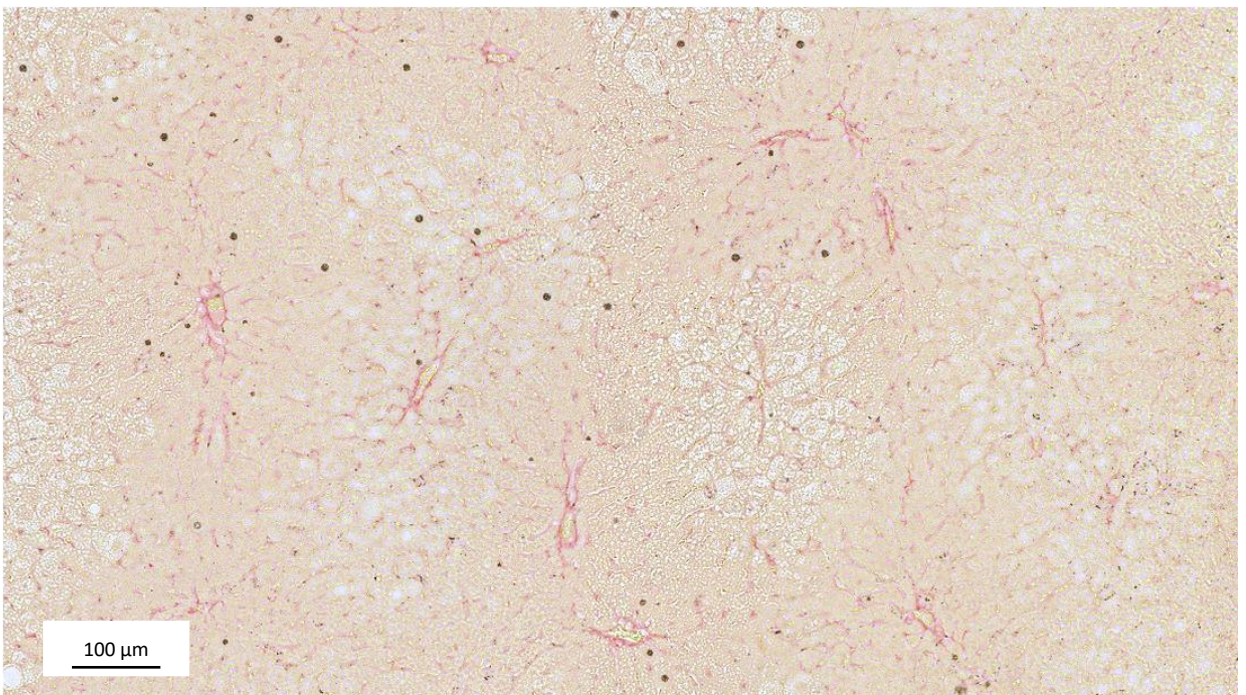



# CDHFD-3

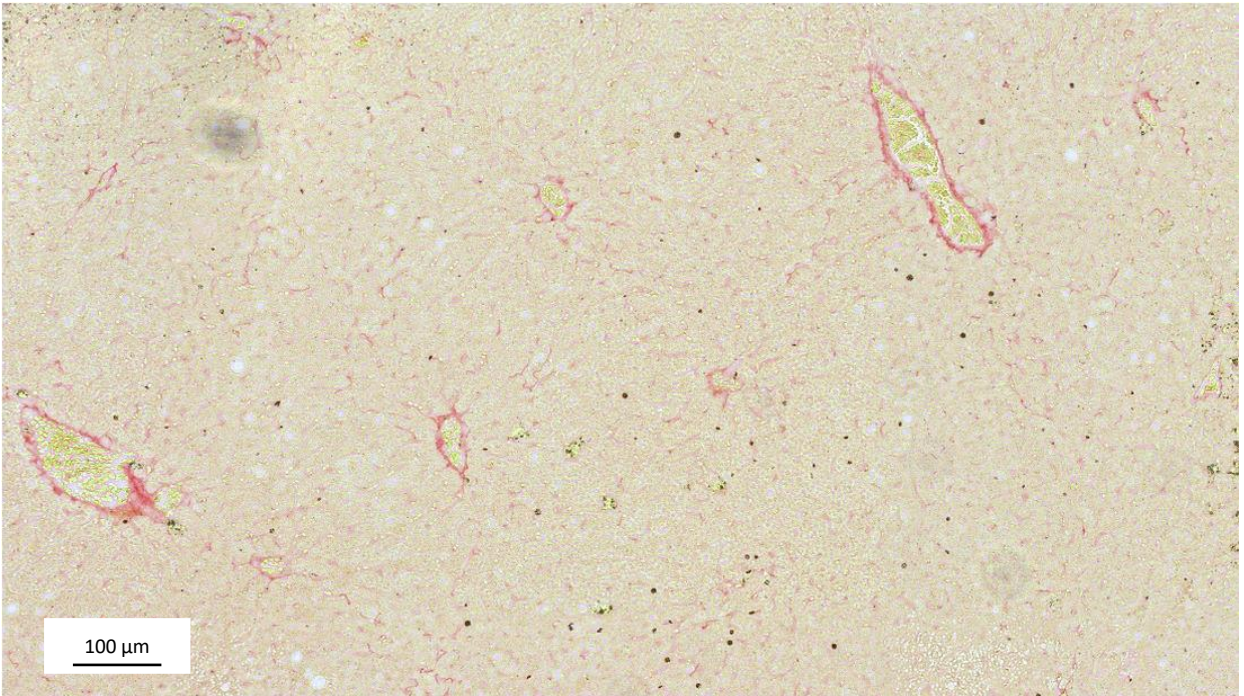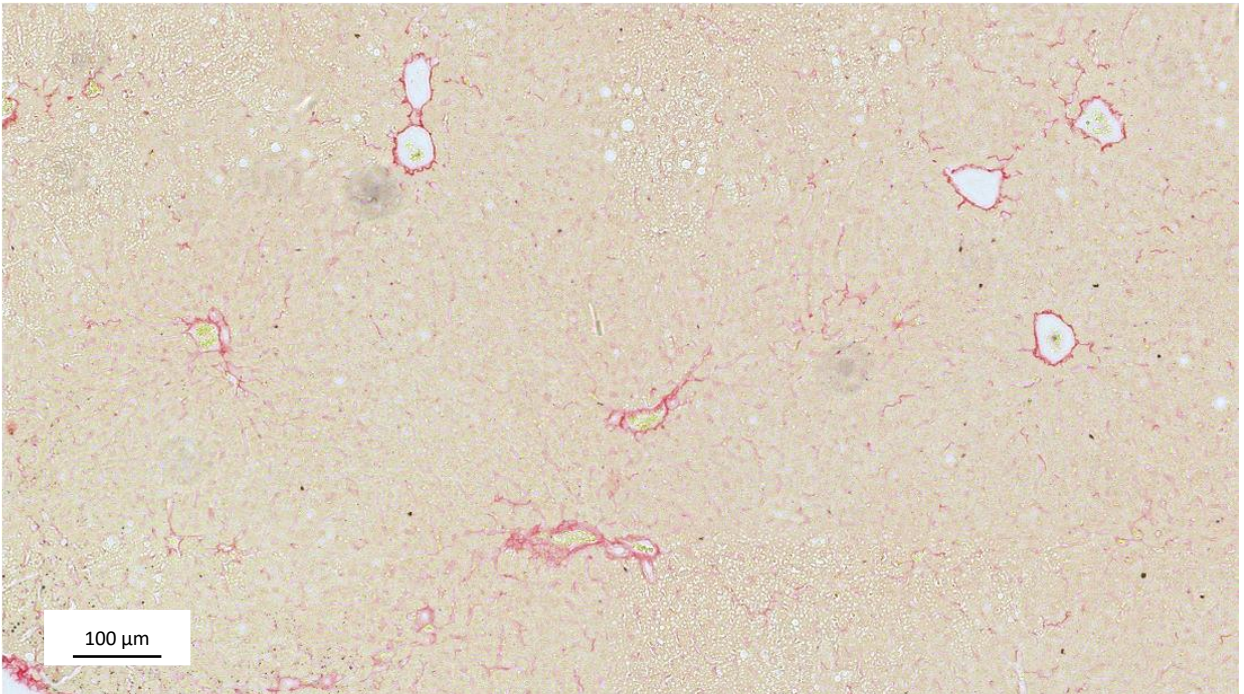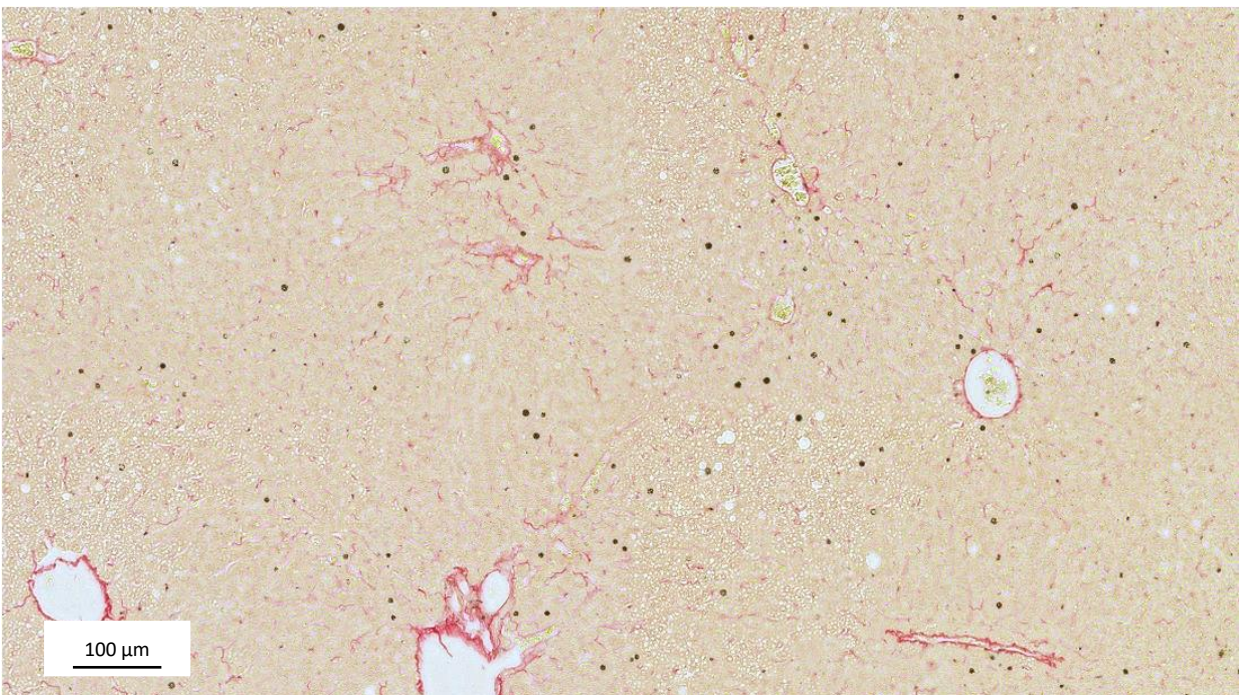

# CDHFD-4

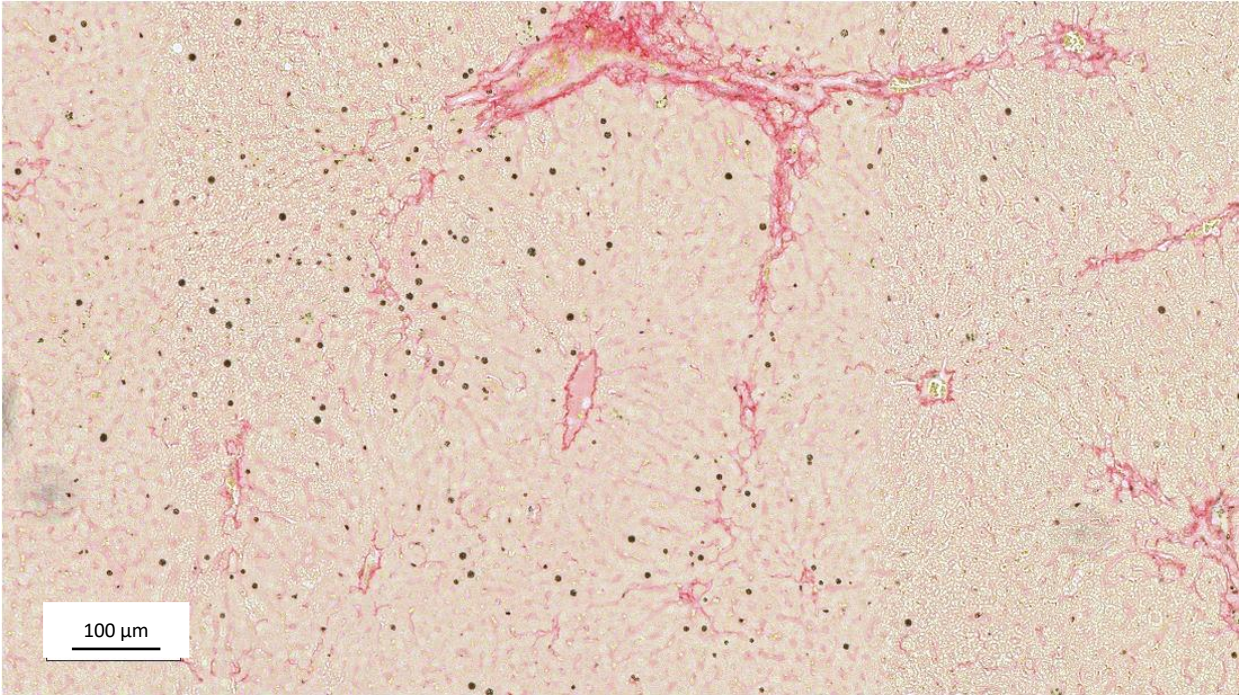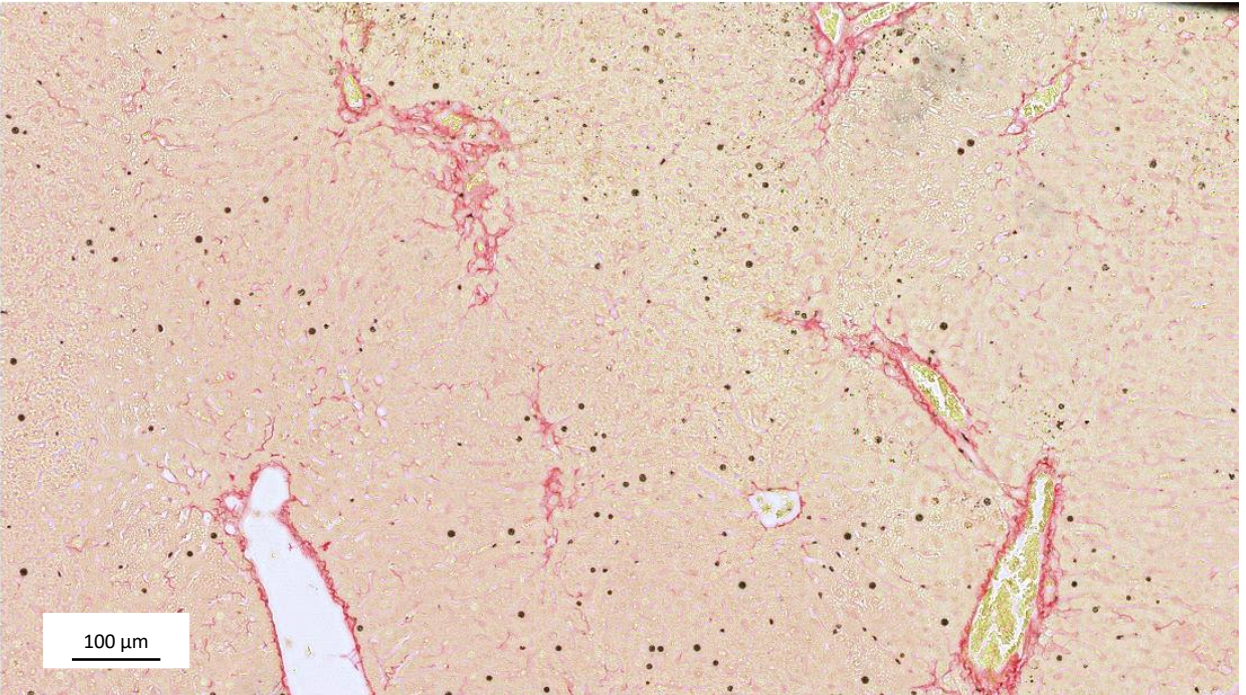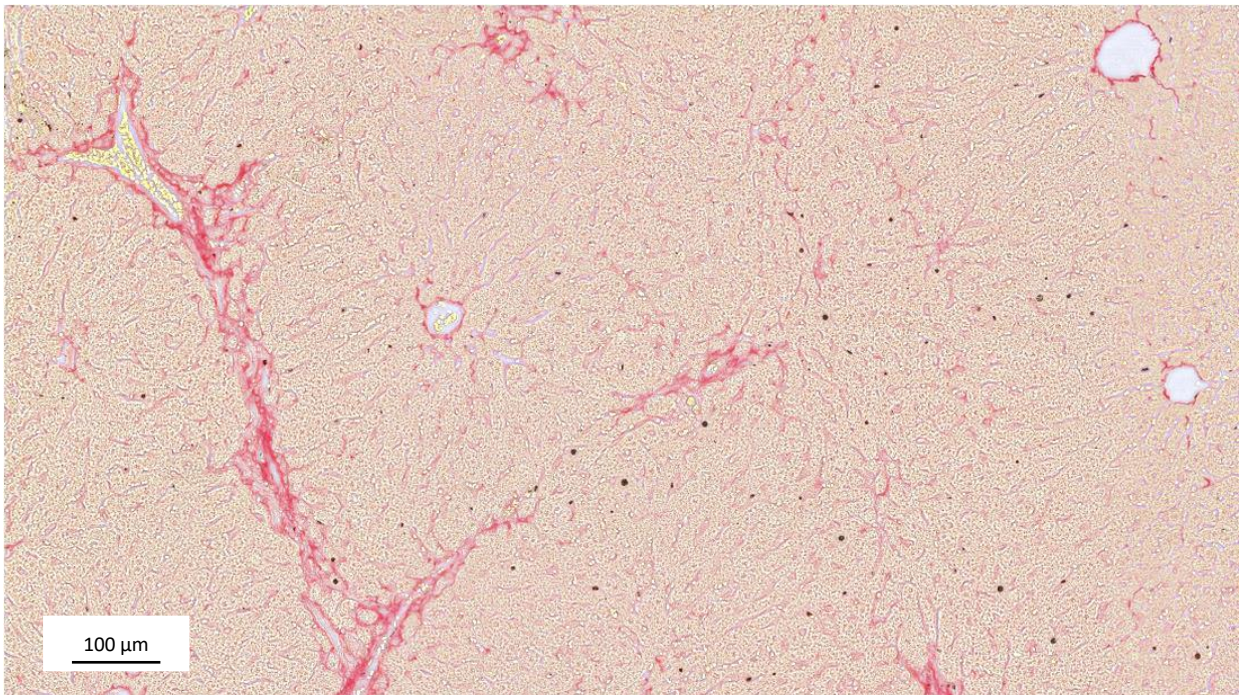

# CDHFD-5

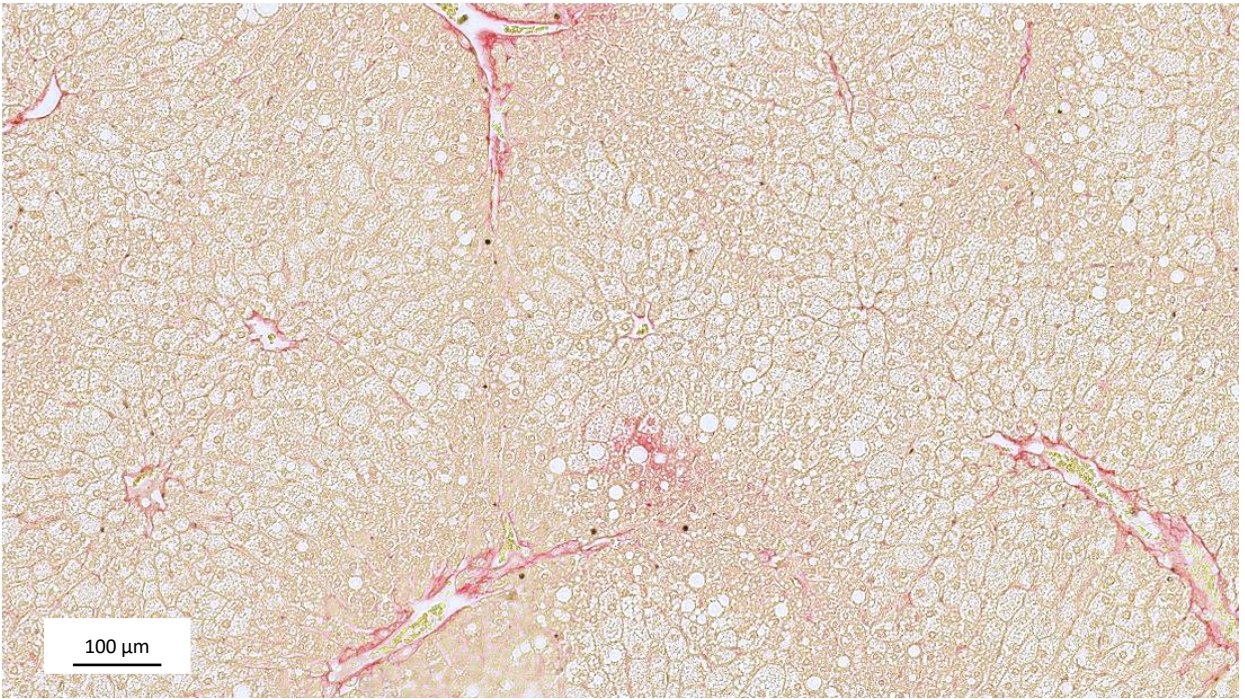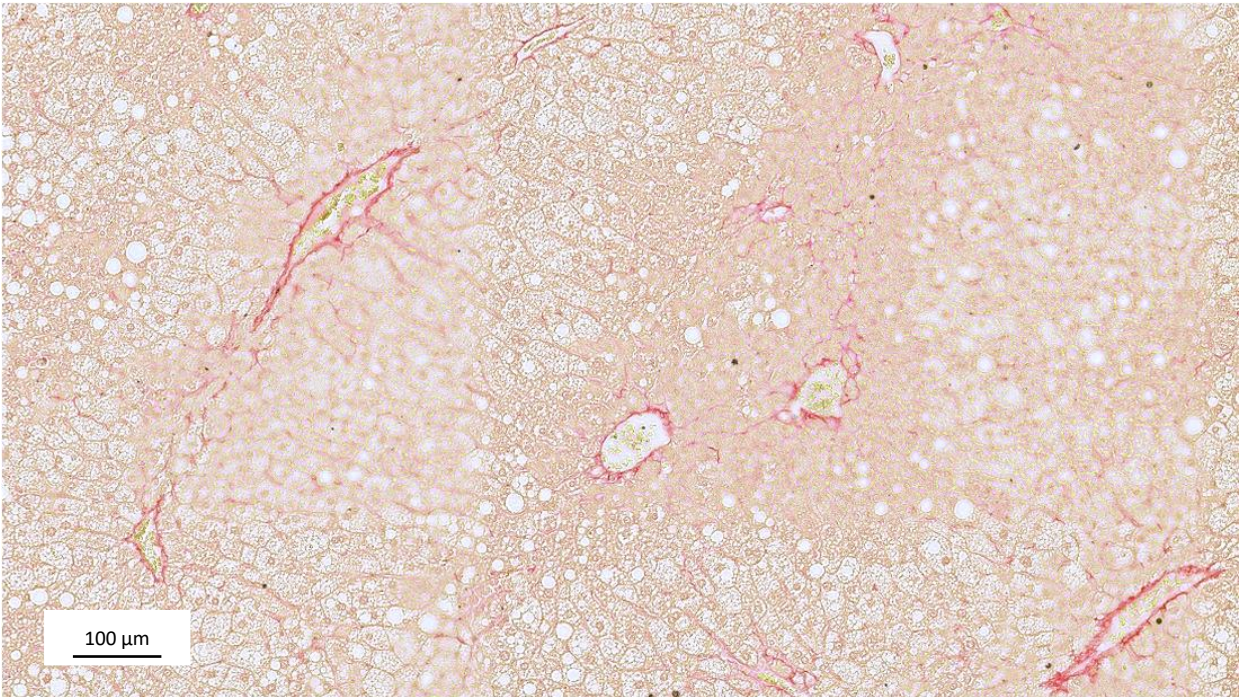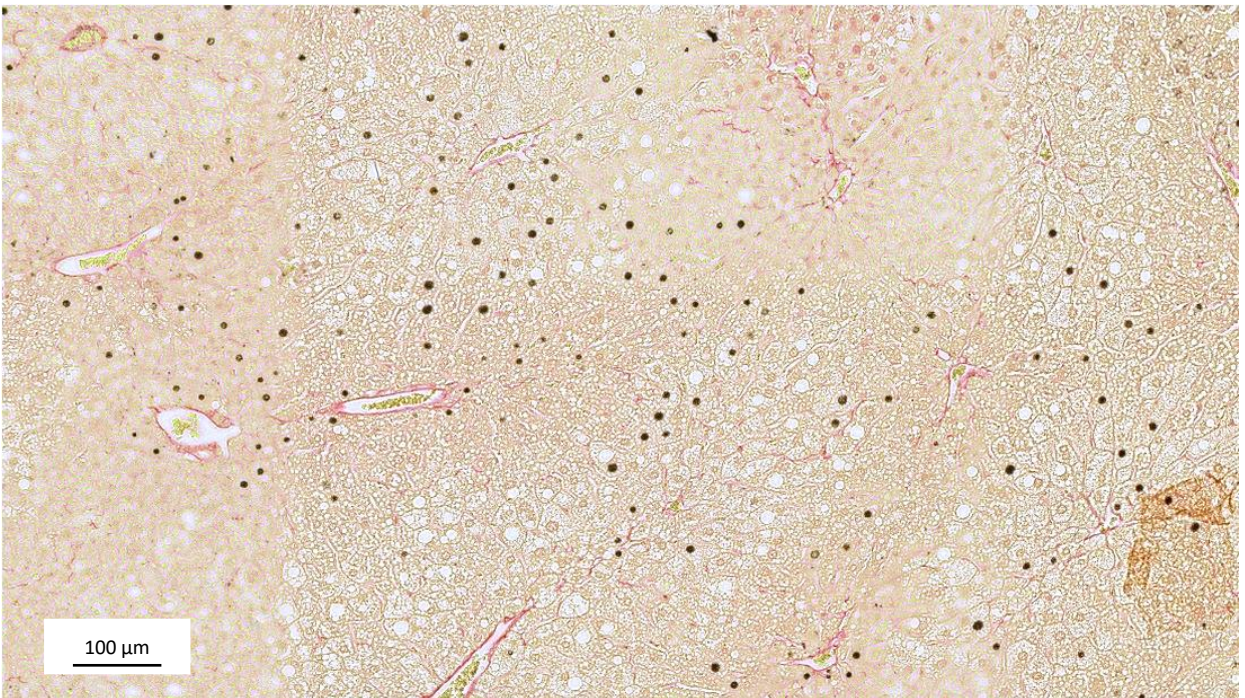

# CDHFD-6

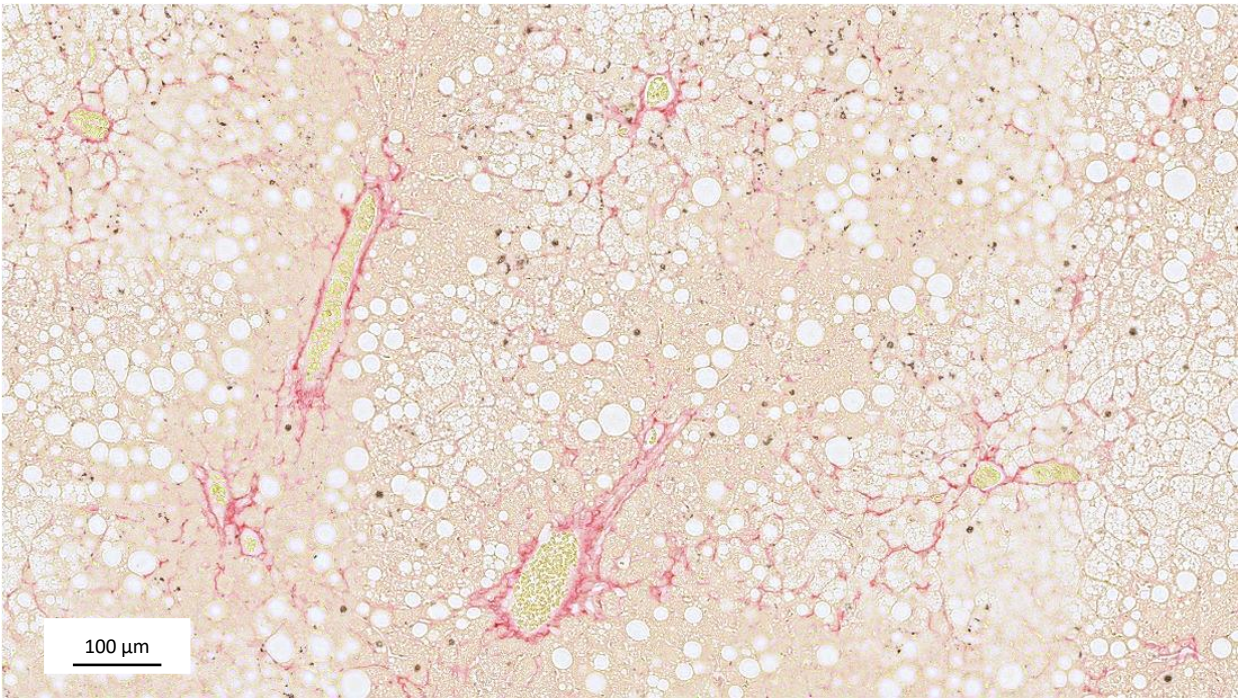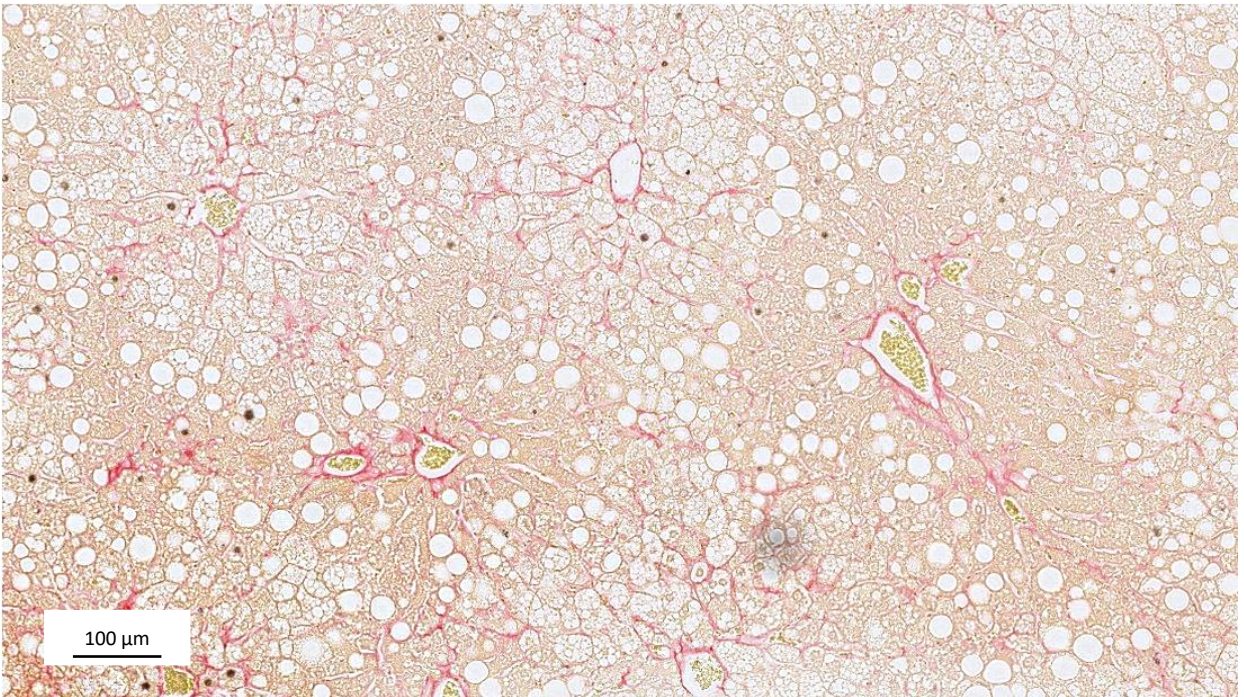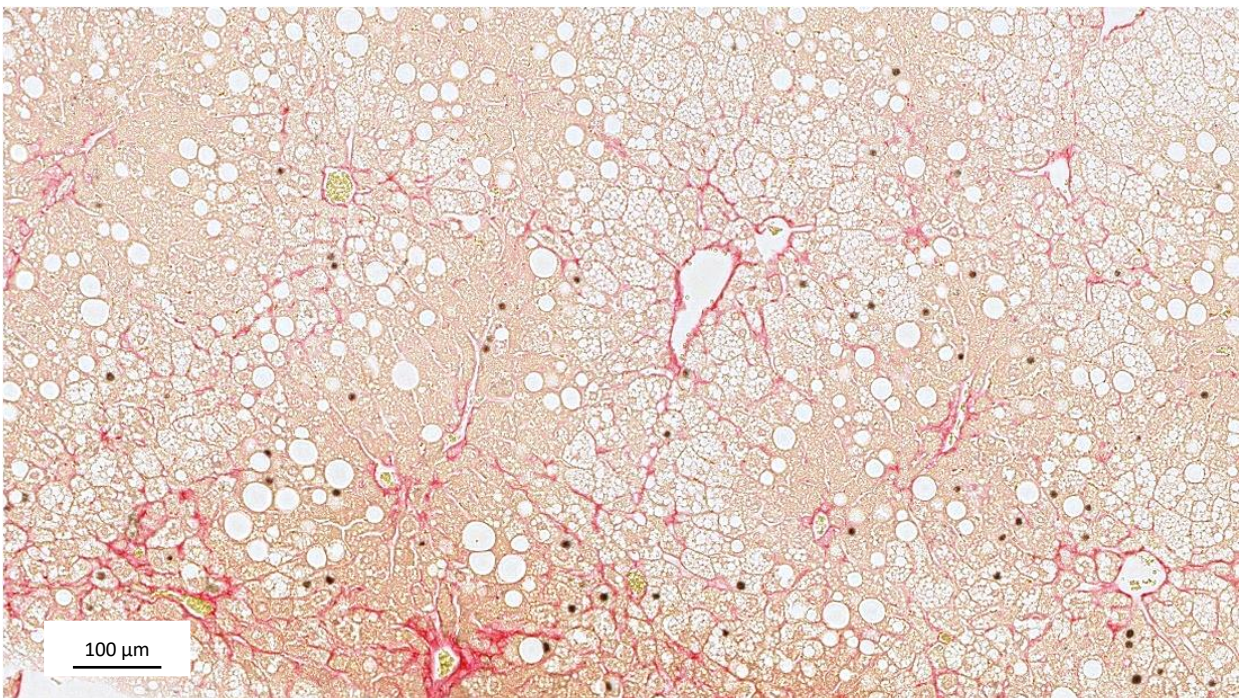

# CDHFD-7

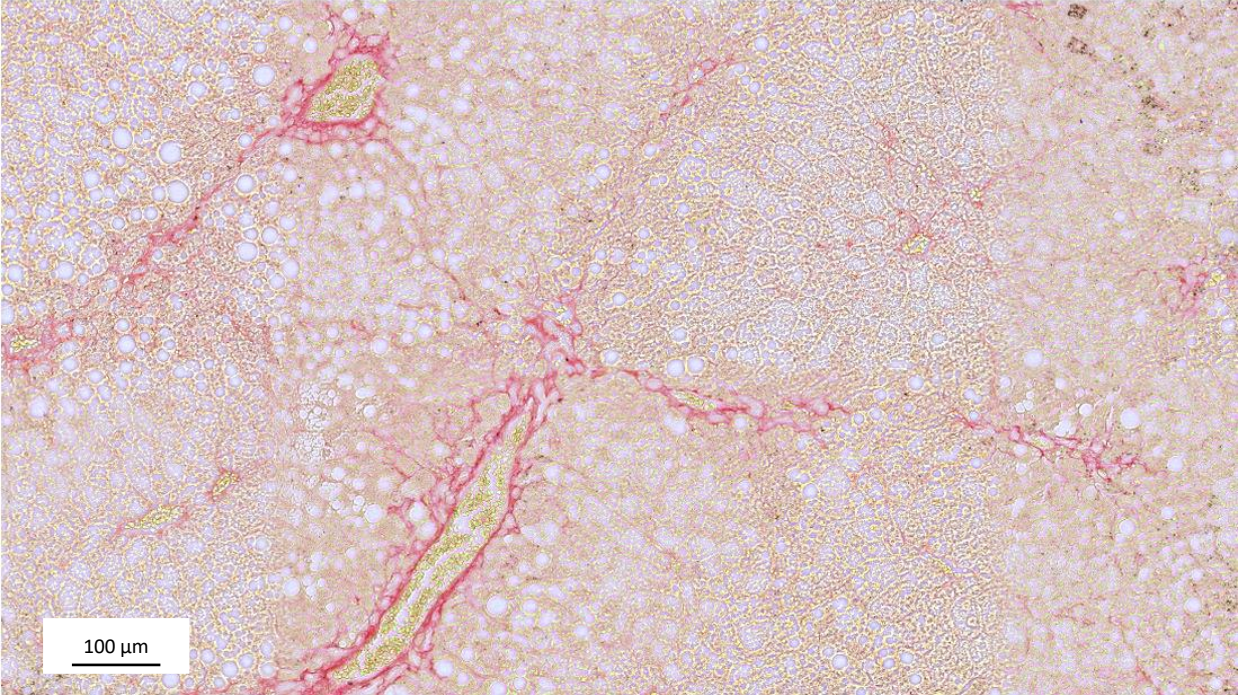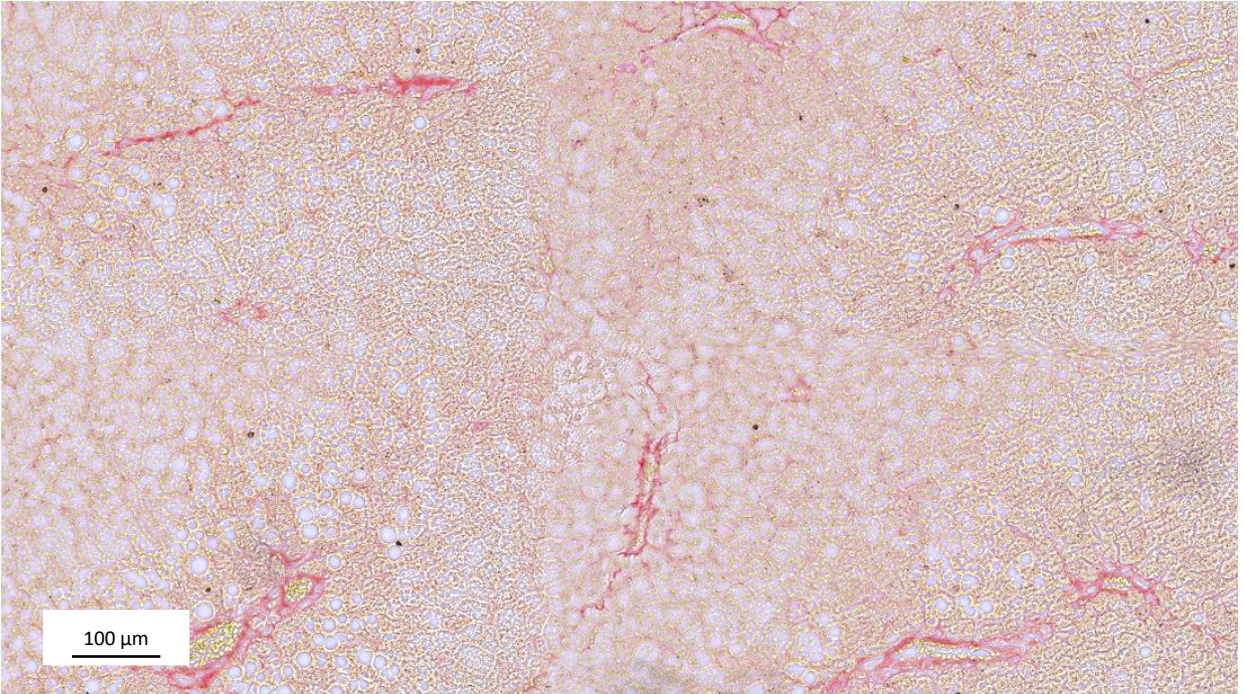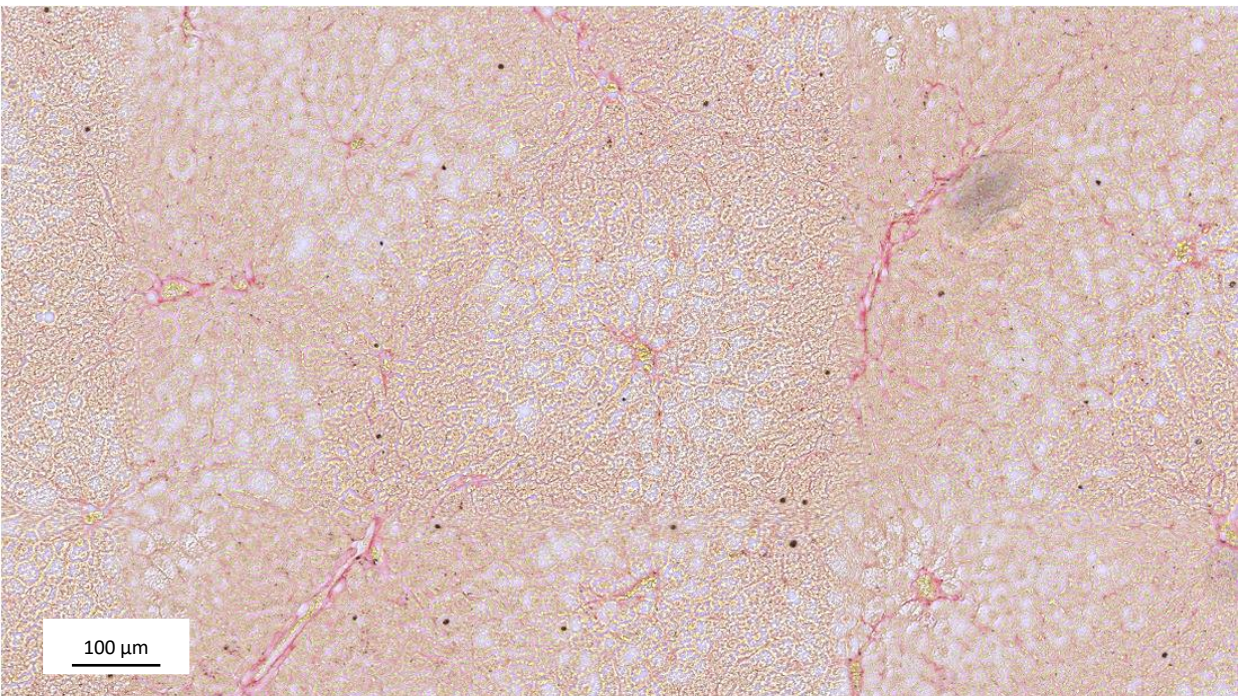

# CDHFD-8

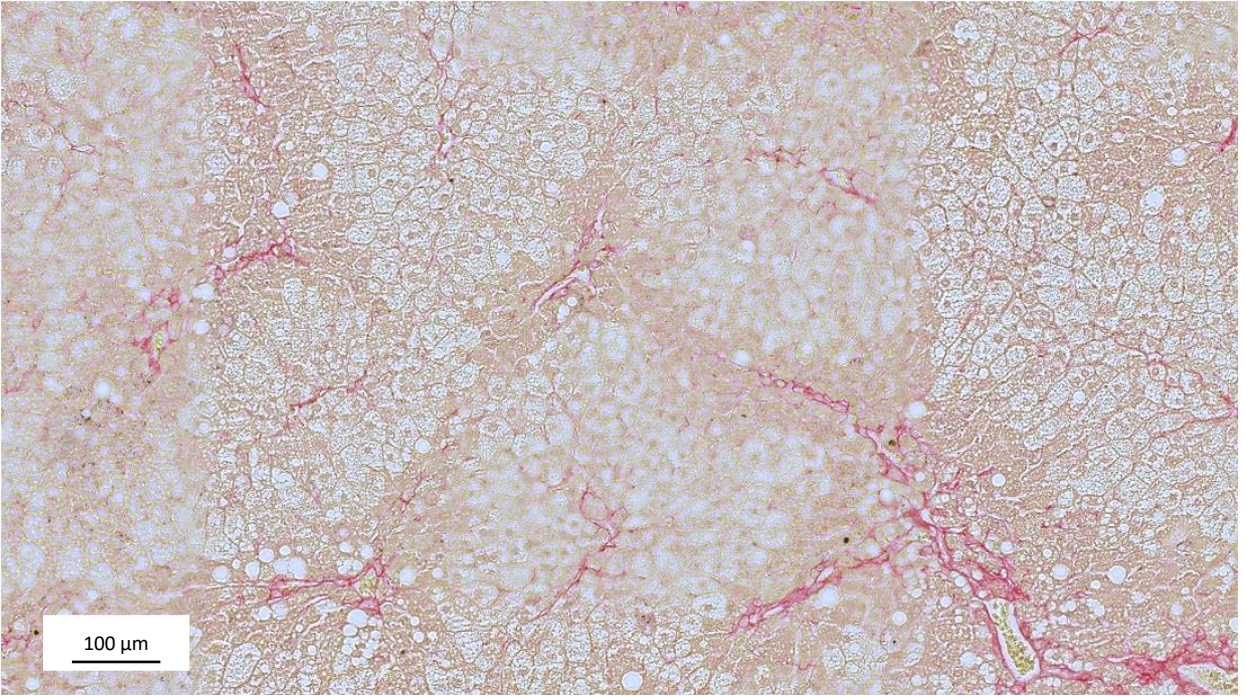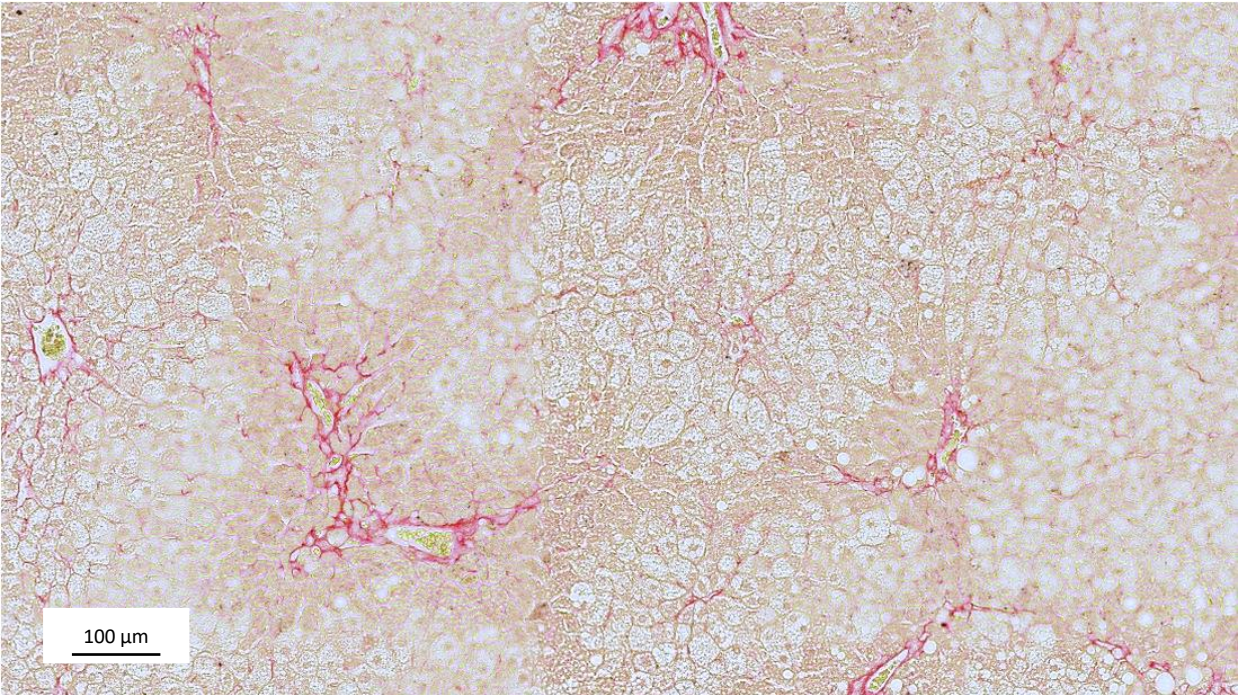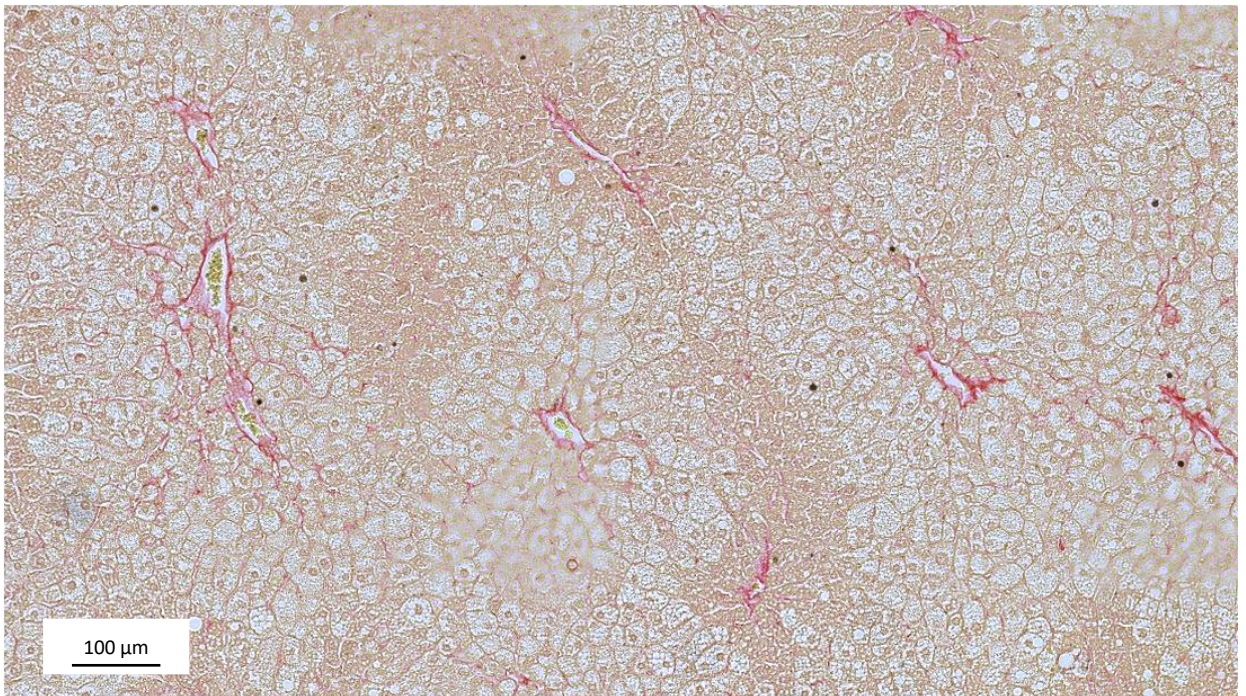

# CDHFD-9

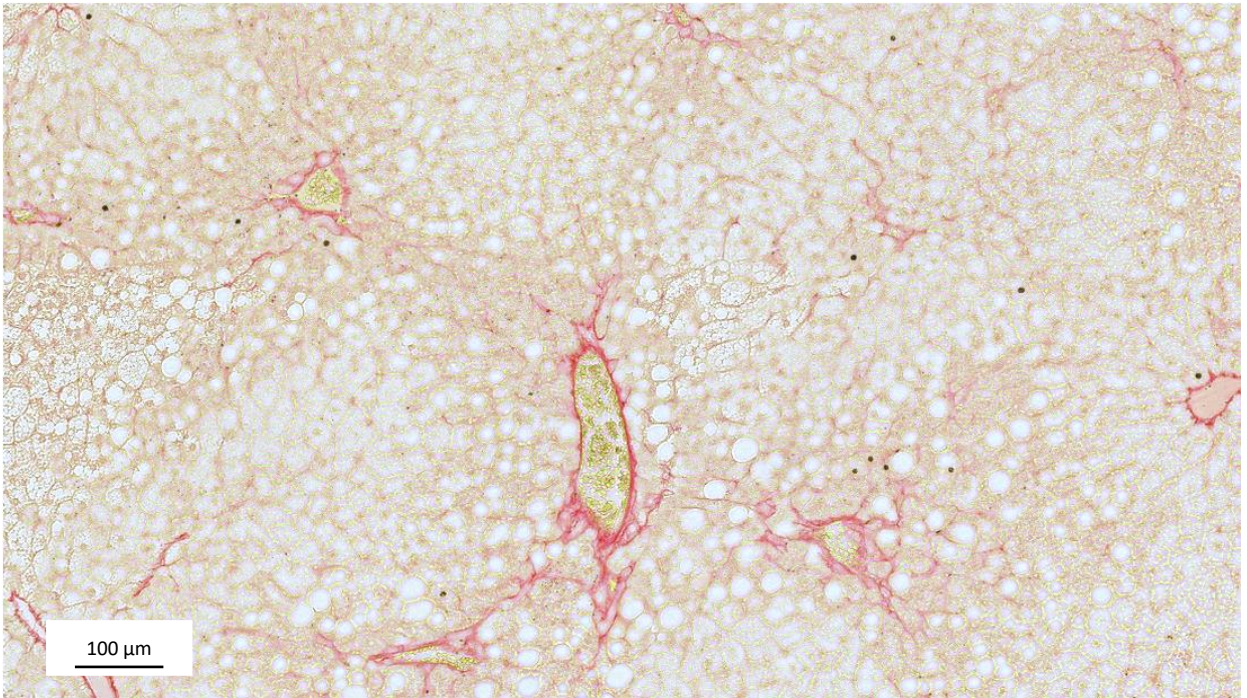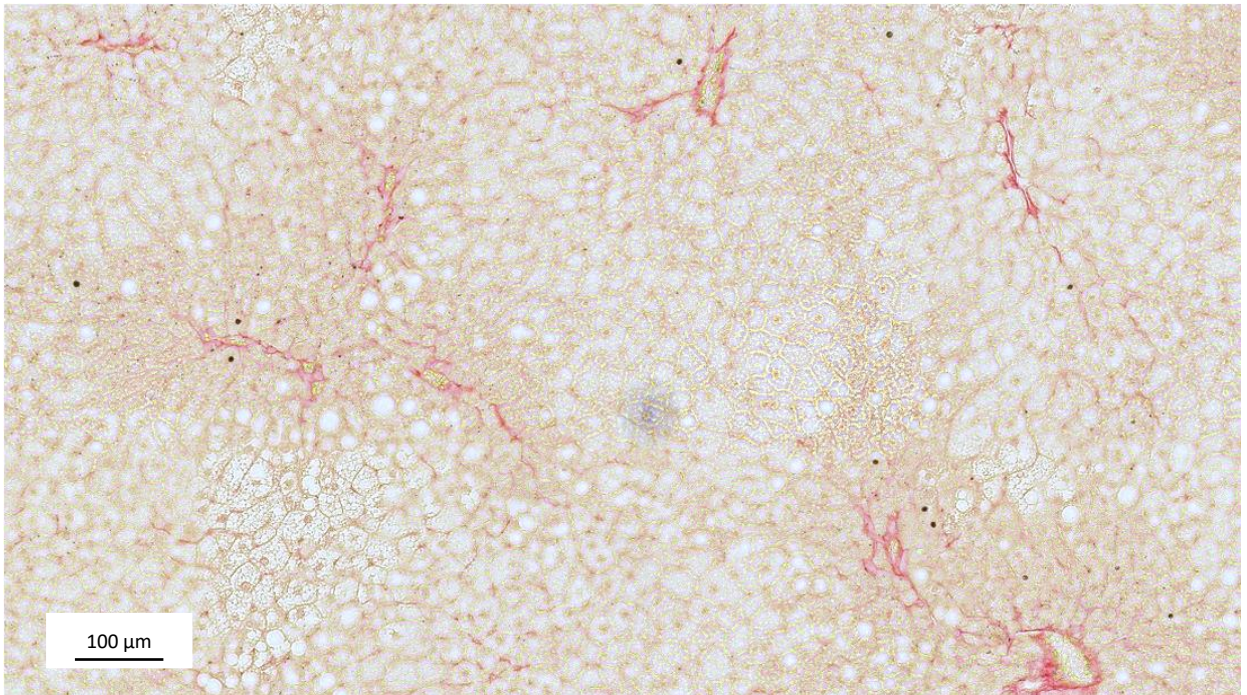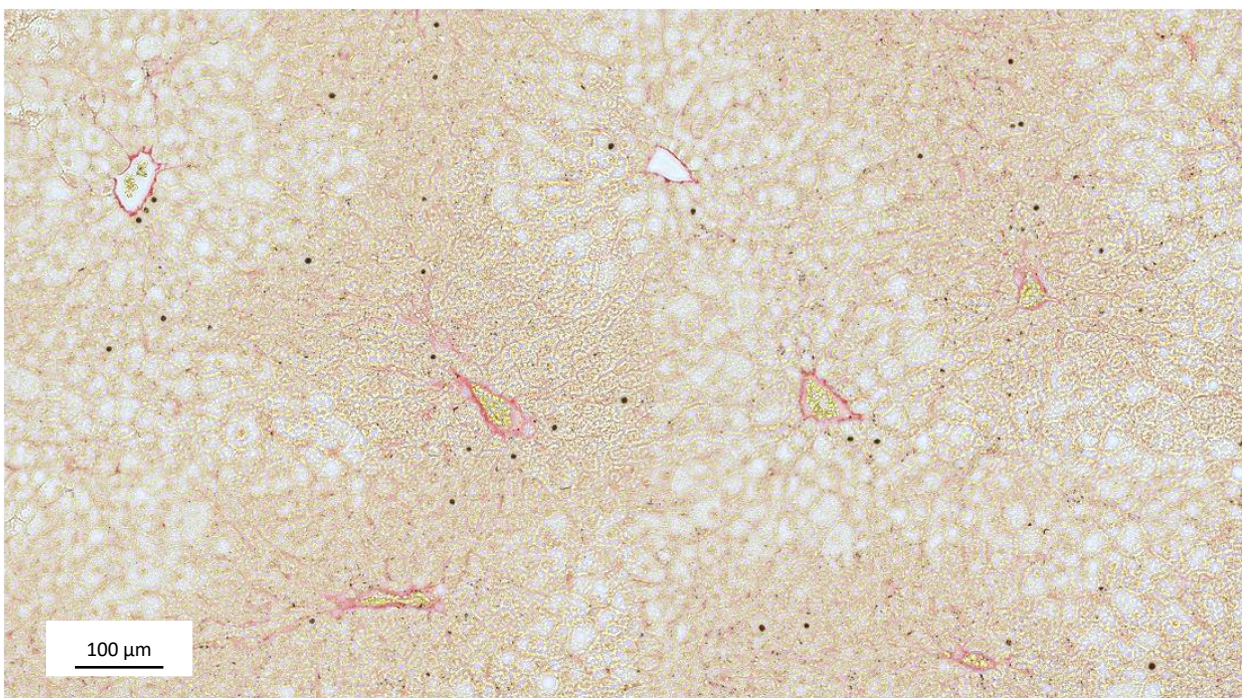

# CDHFD-10

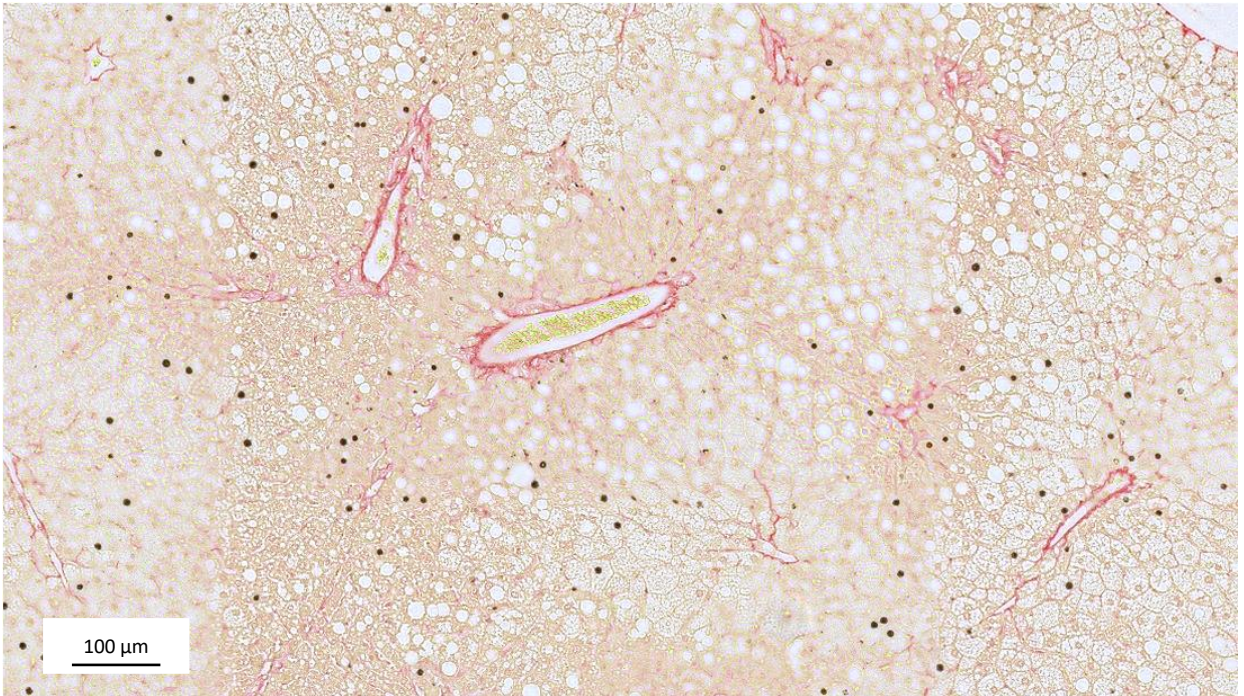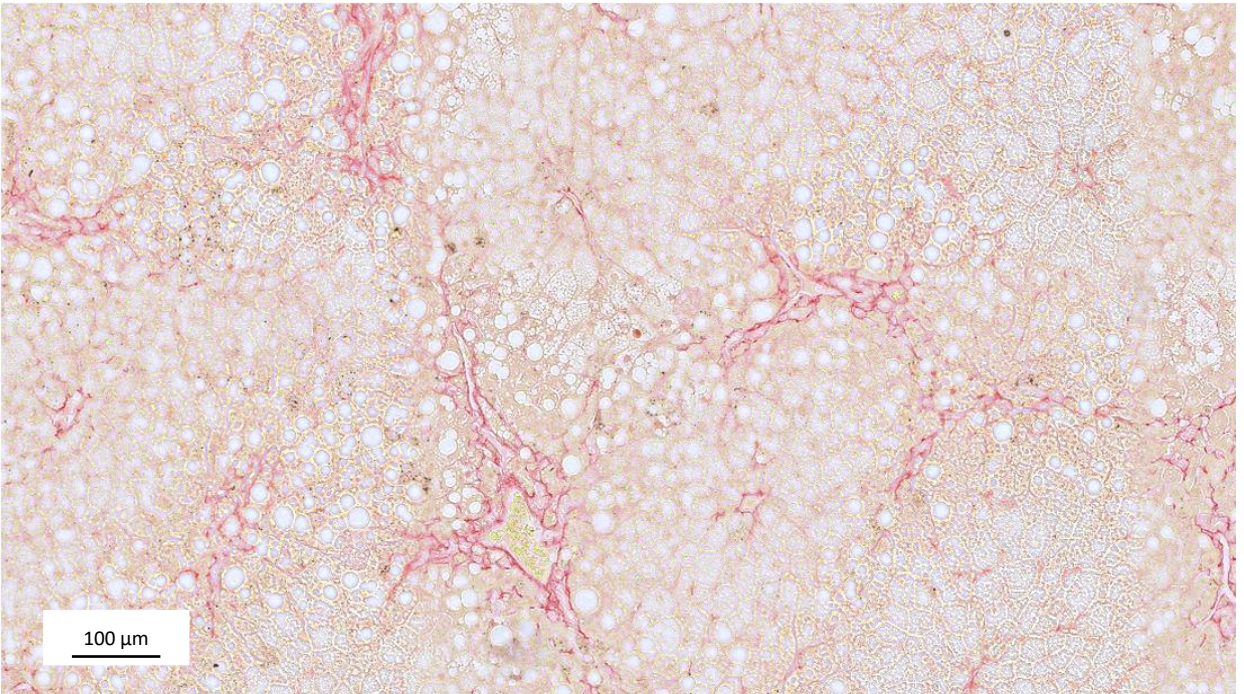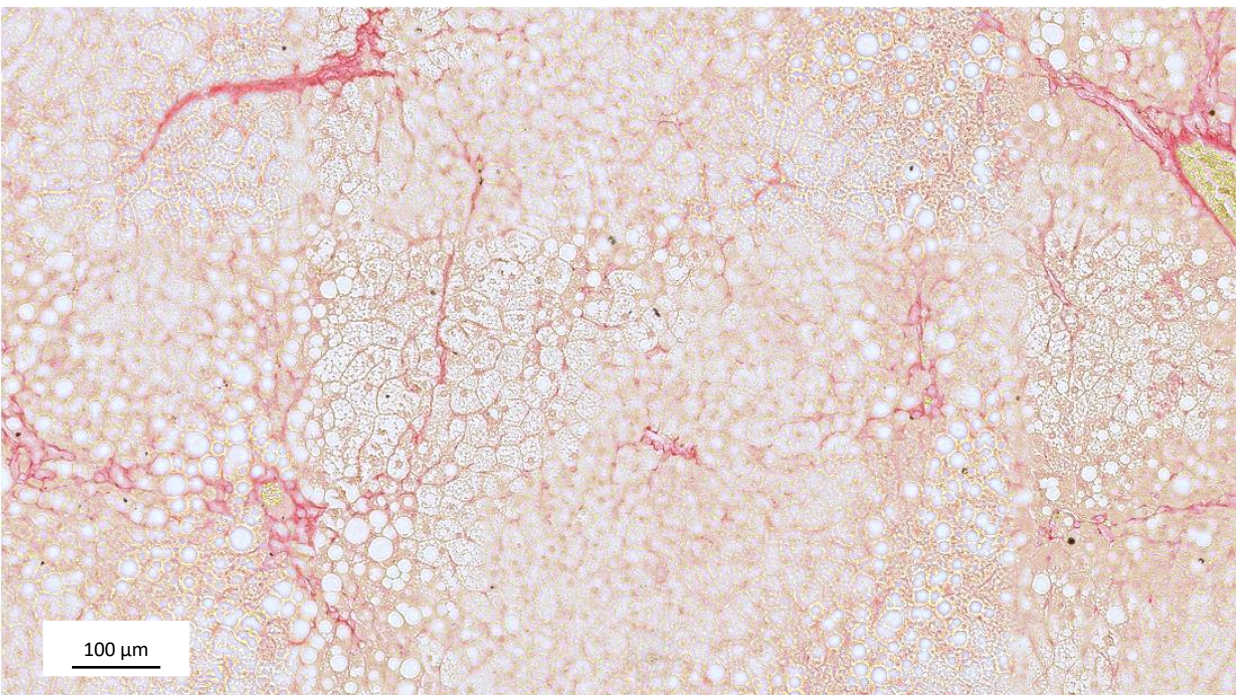



# CDHFD-11

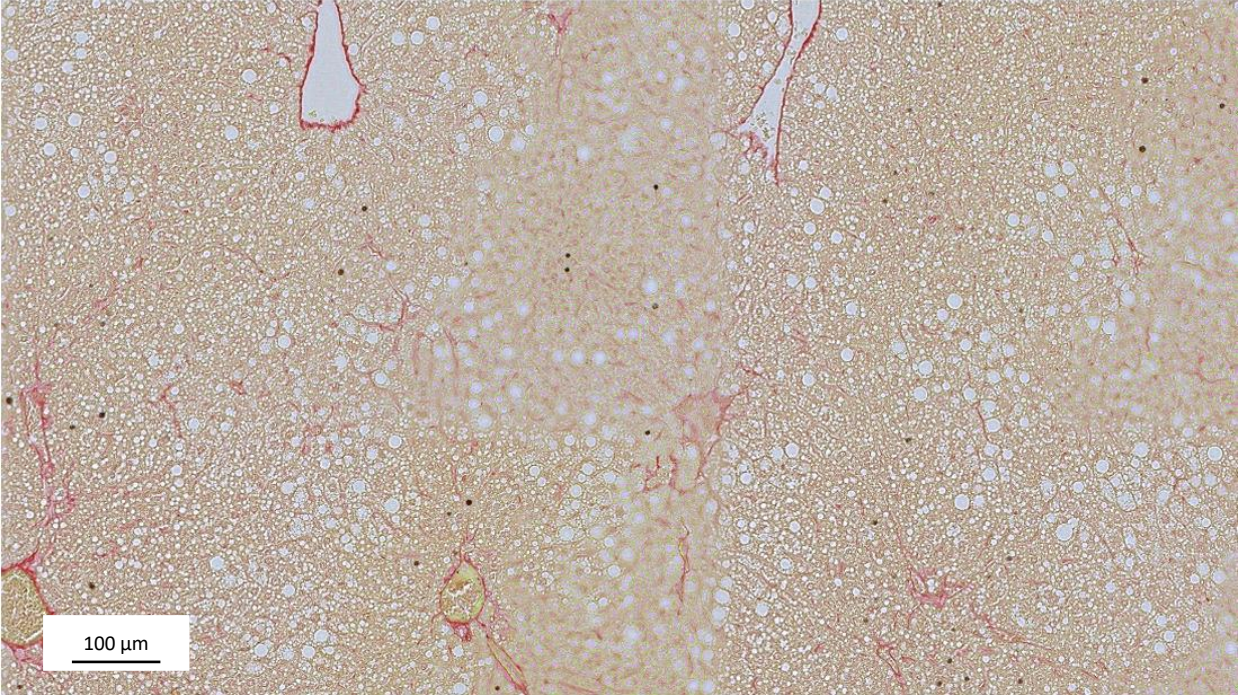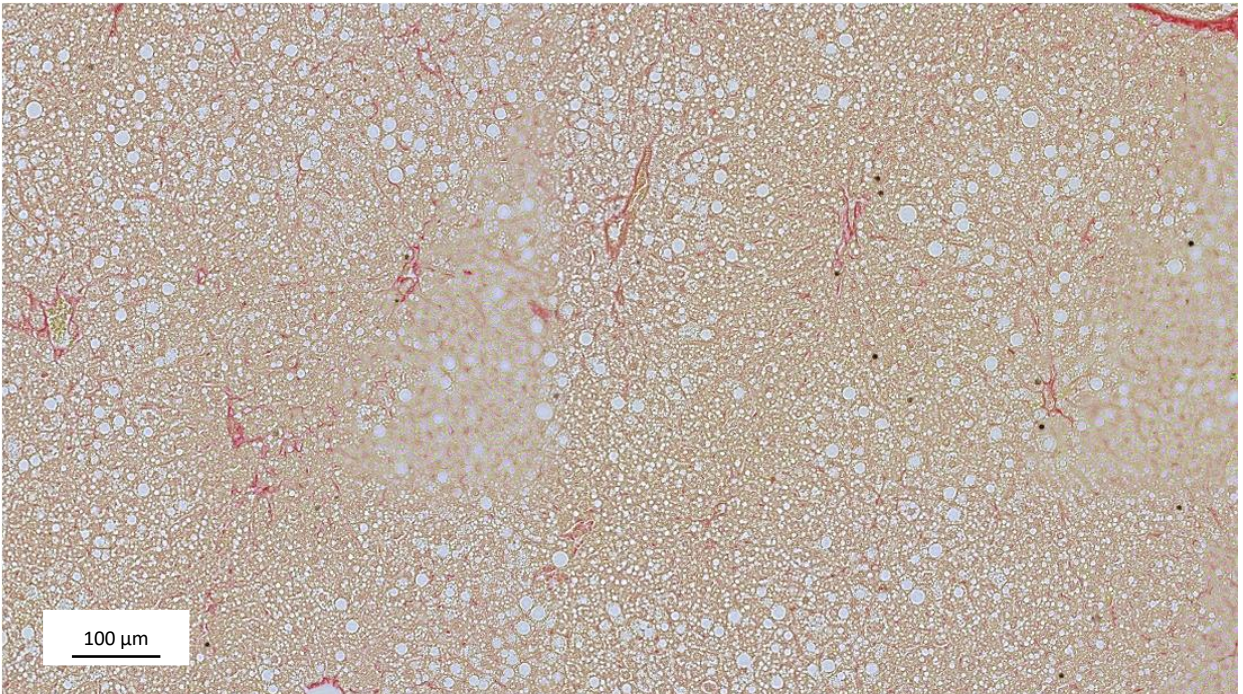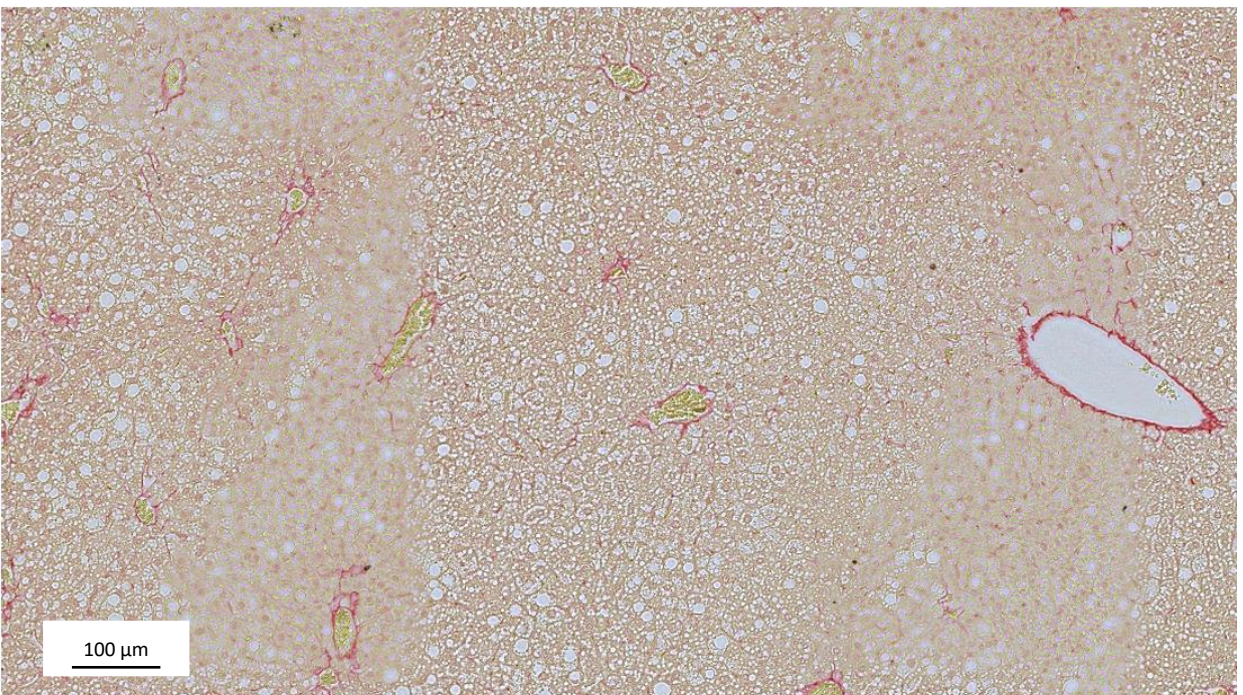

# CDHFD-12

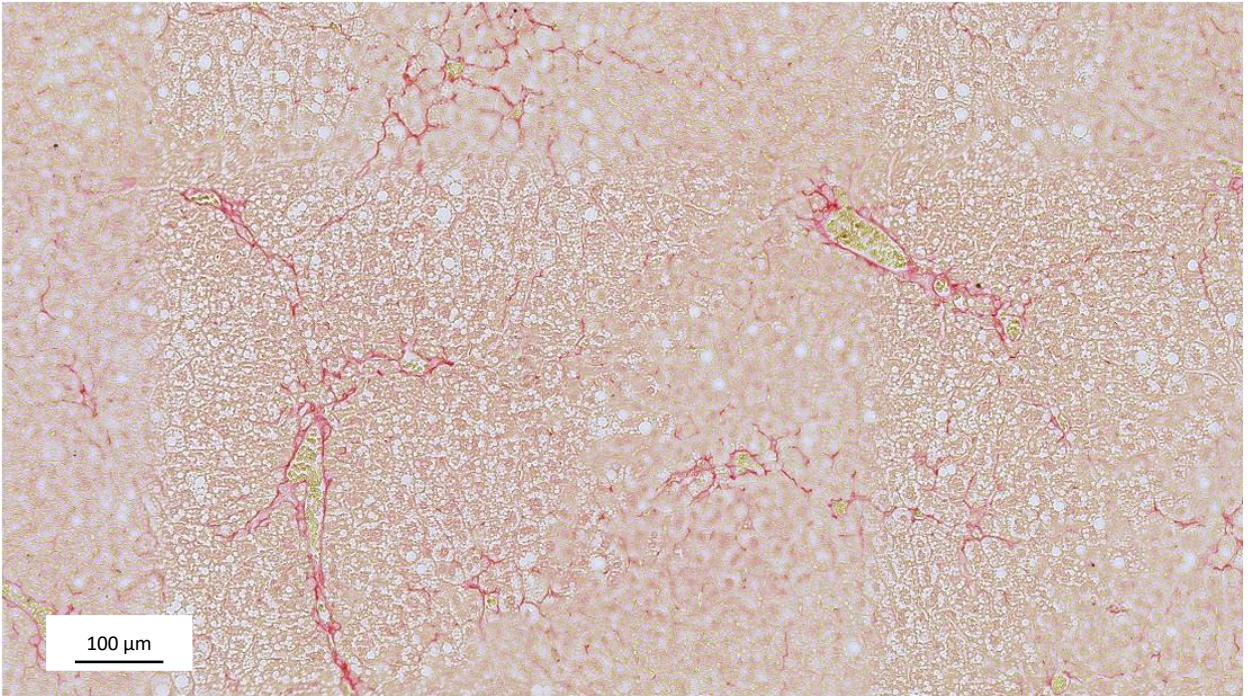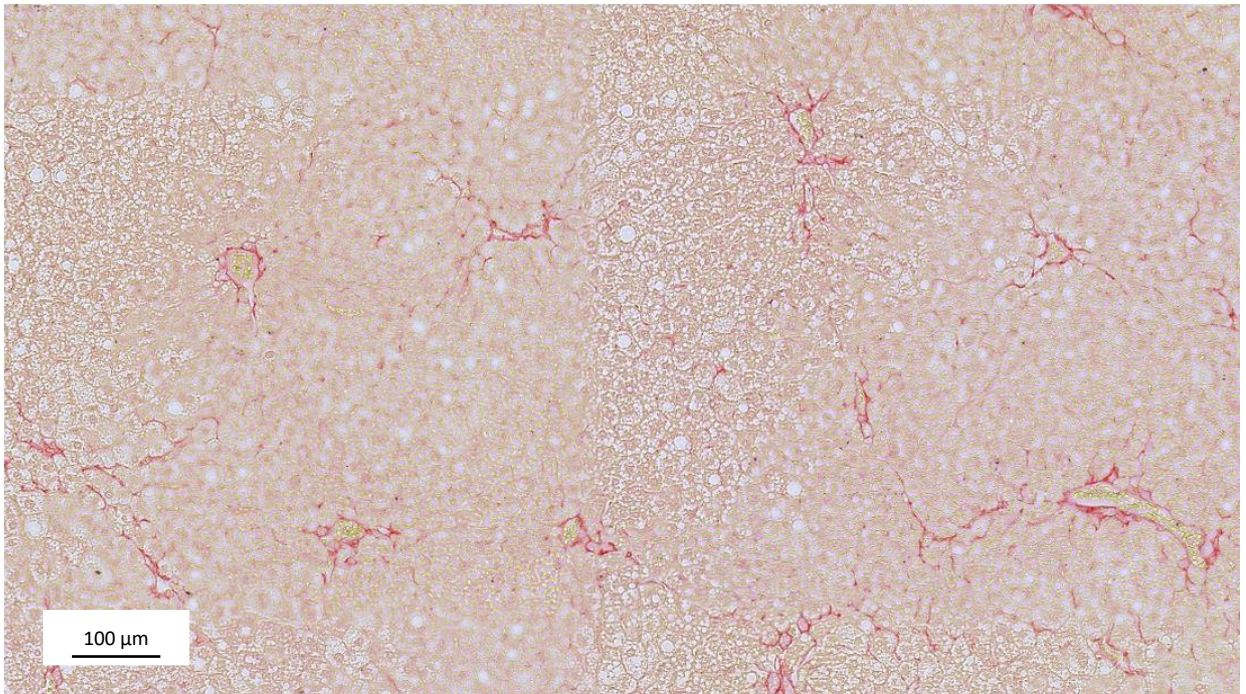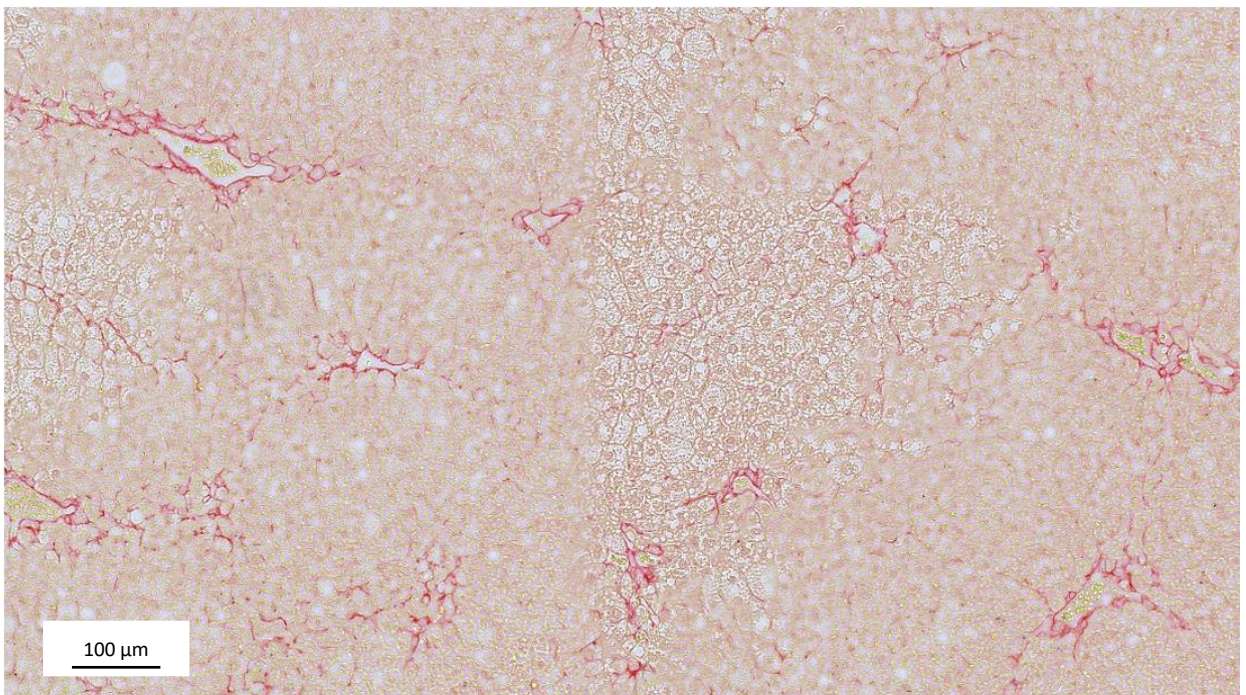

# CDHFD-13

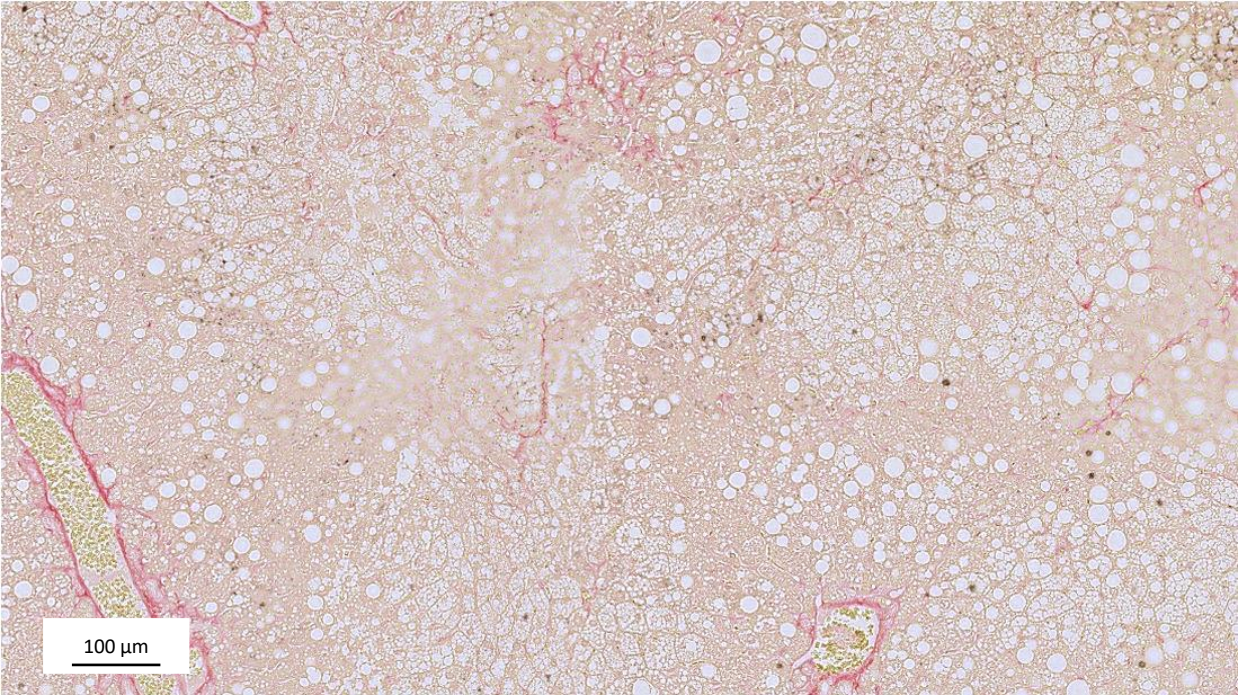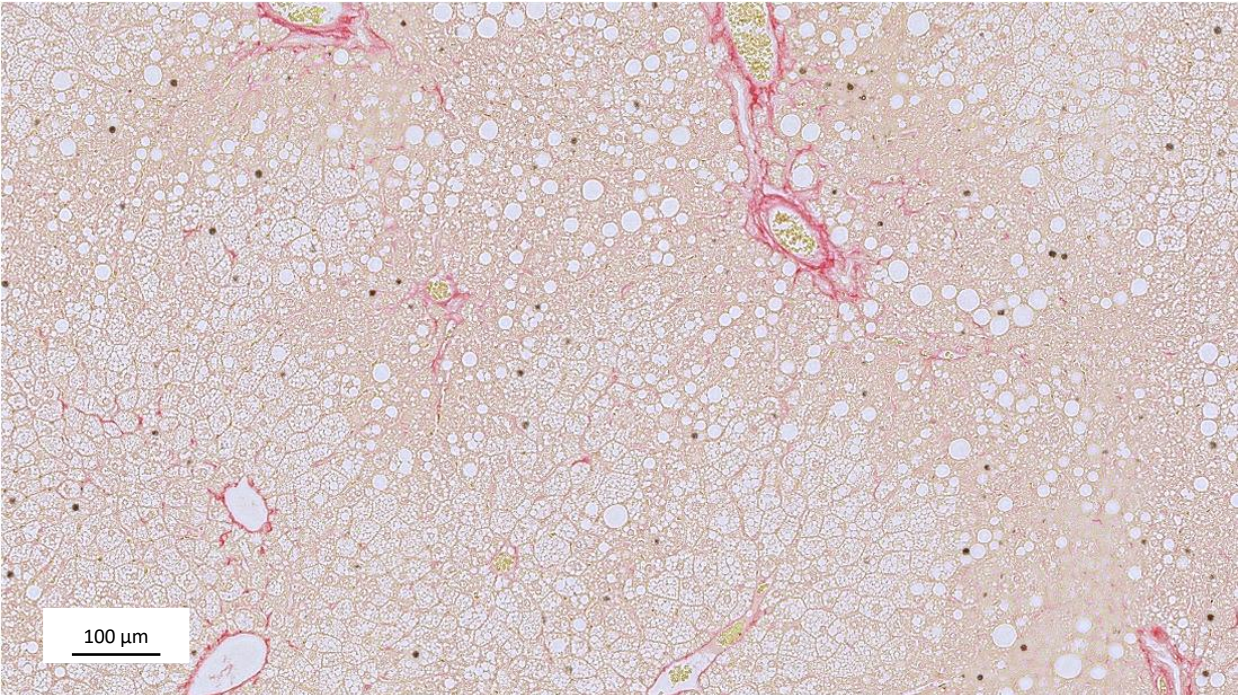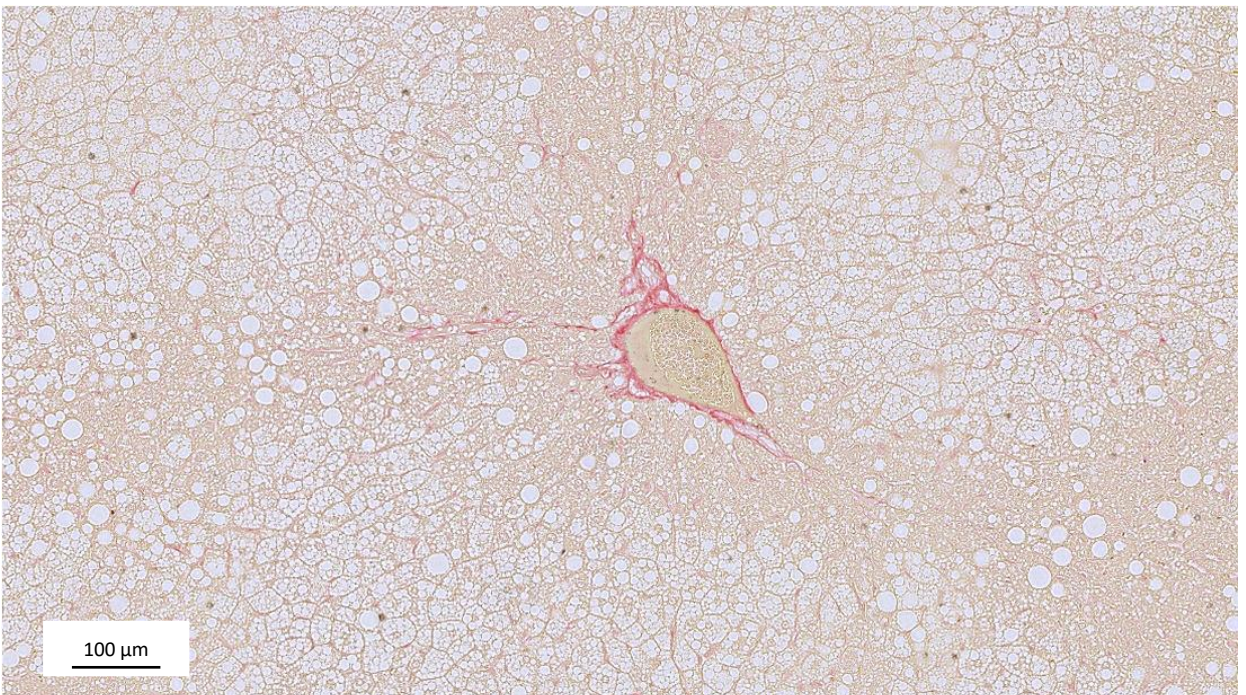

## **Sirius red Staining**

### **CDHFD-I group**

(15 mice were included)

# CDHFD-I-1

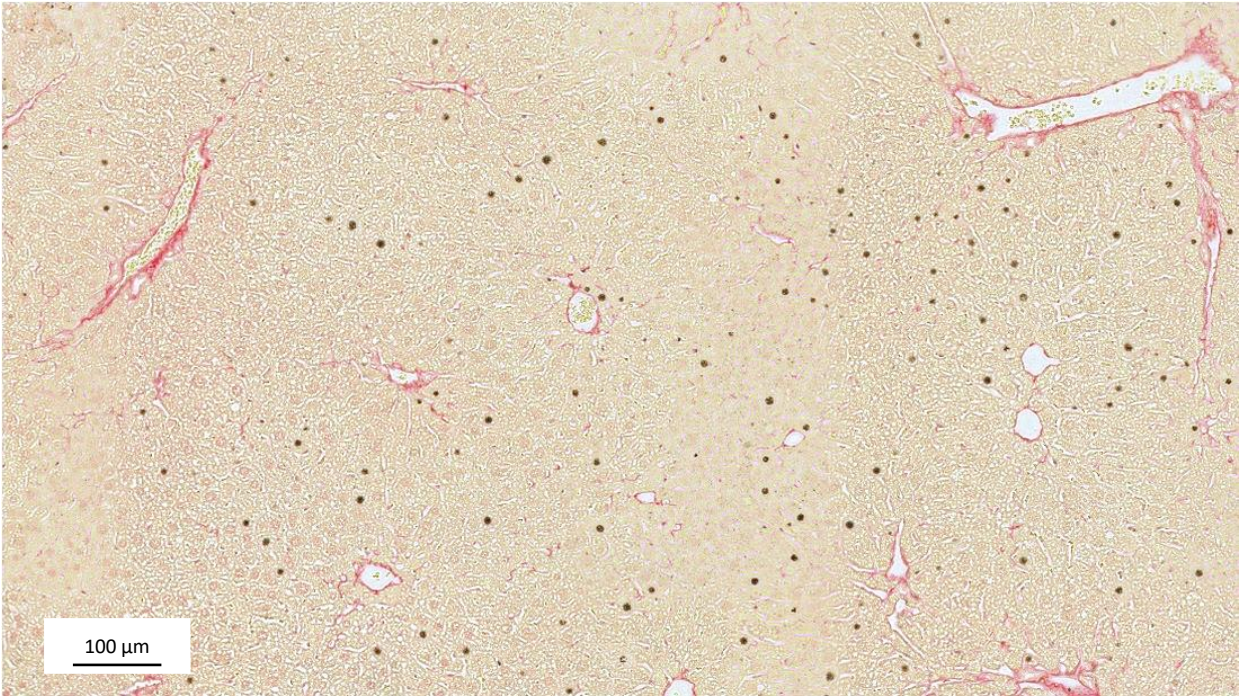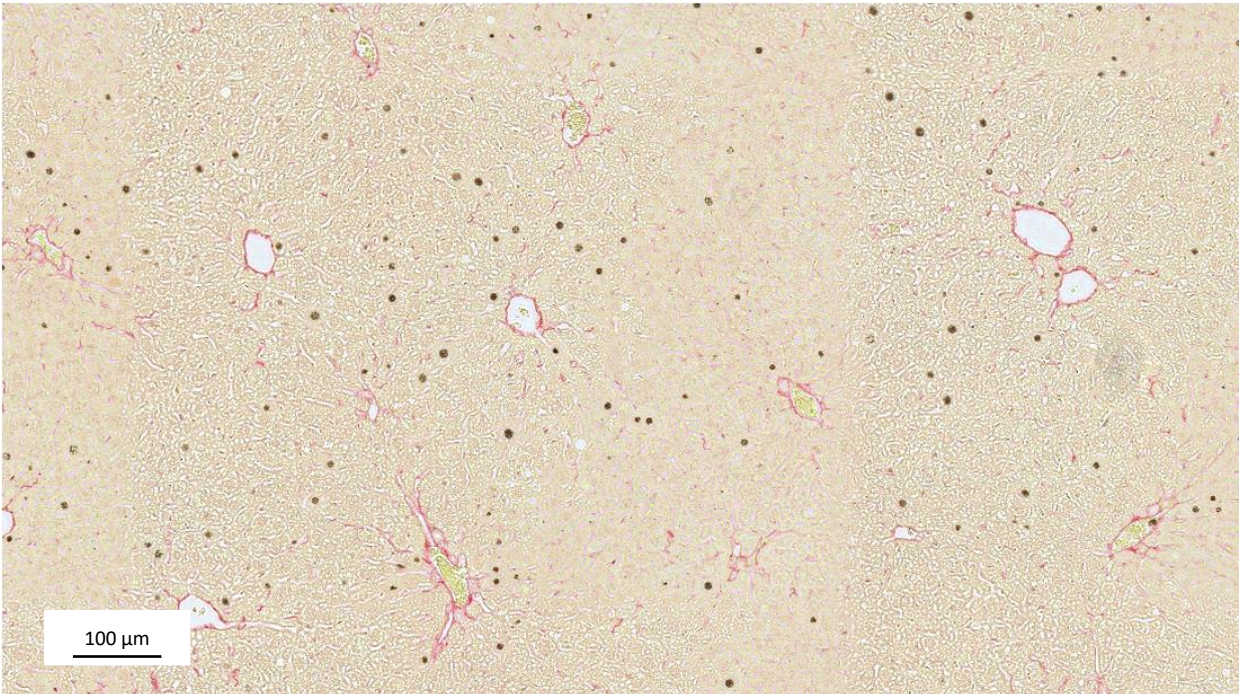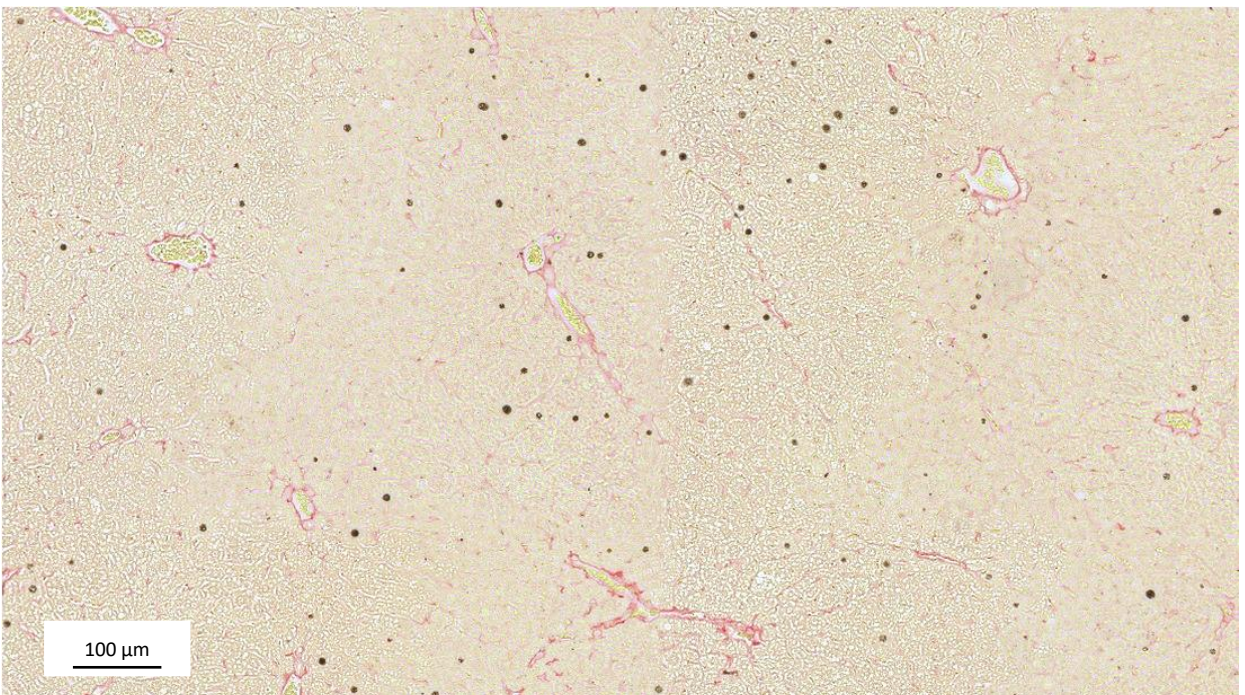

# CDHFD-I-2

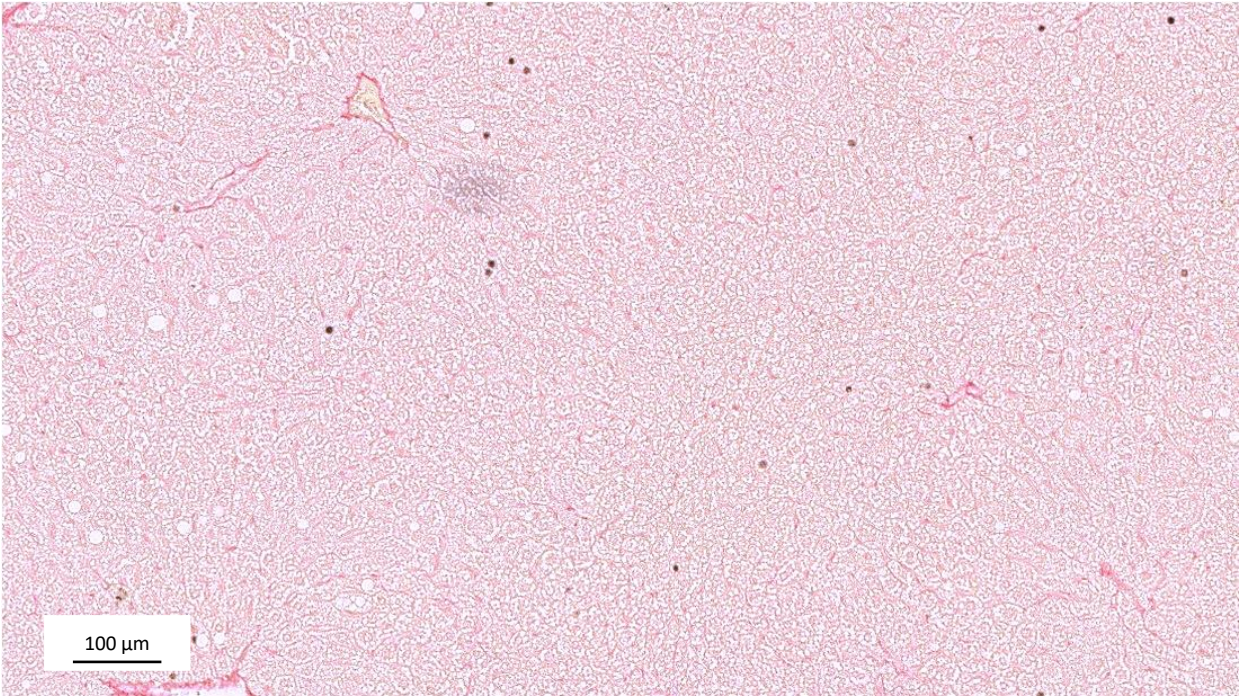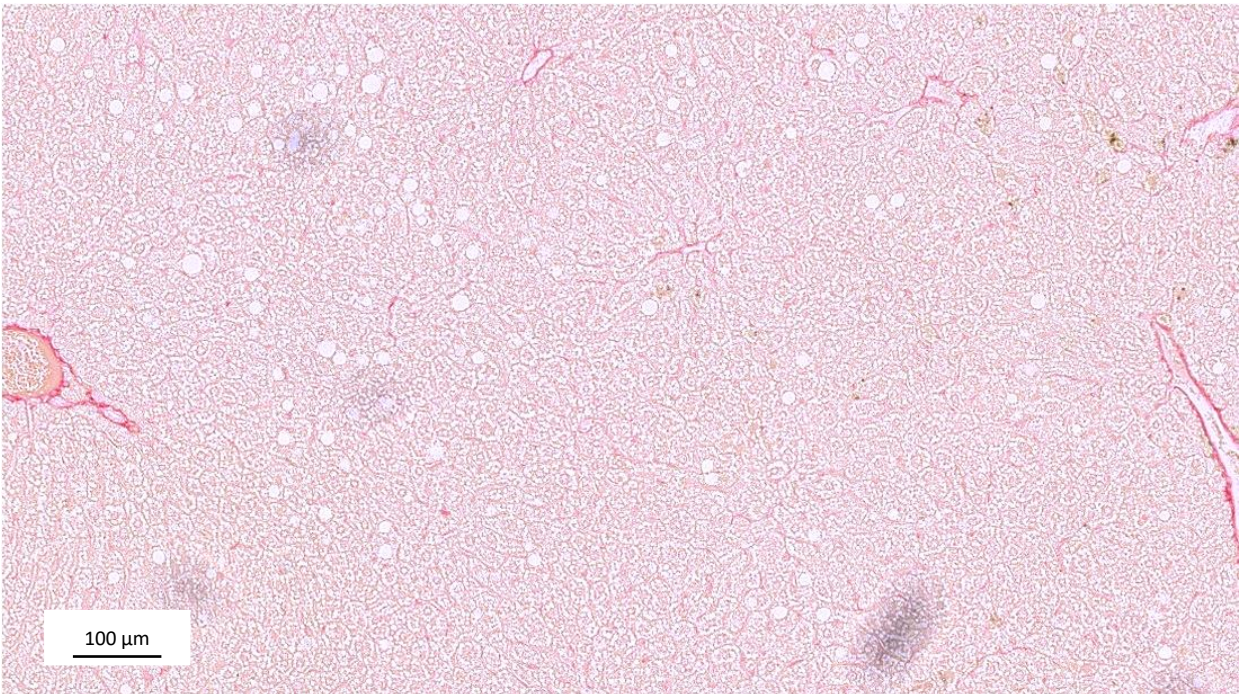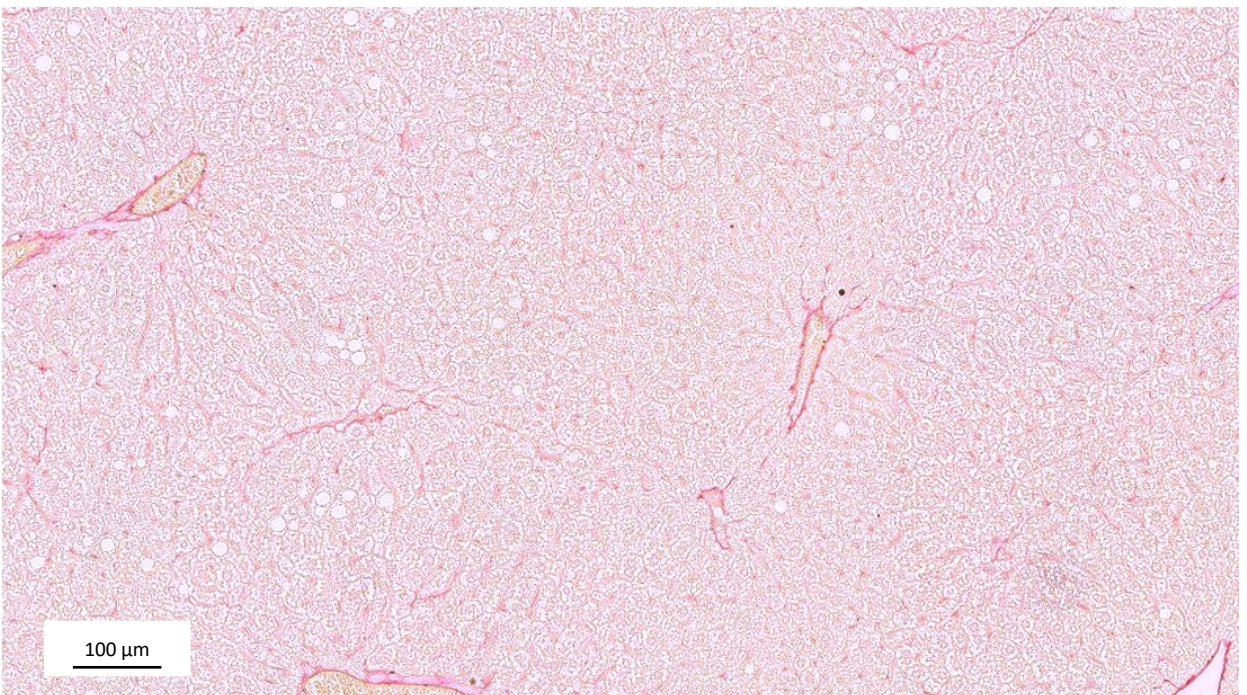

# CDHFD-I-3

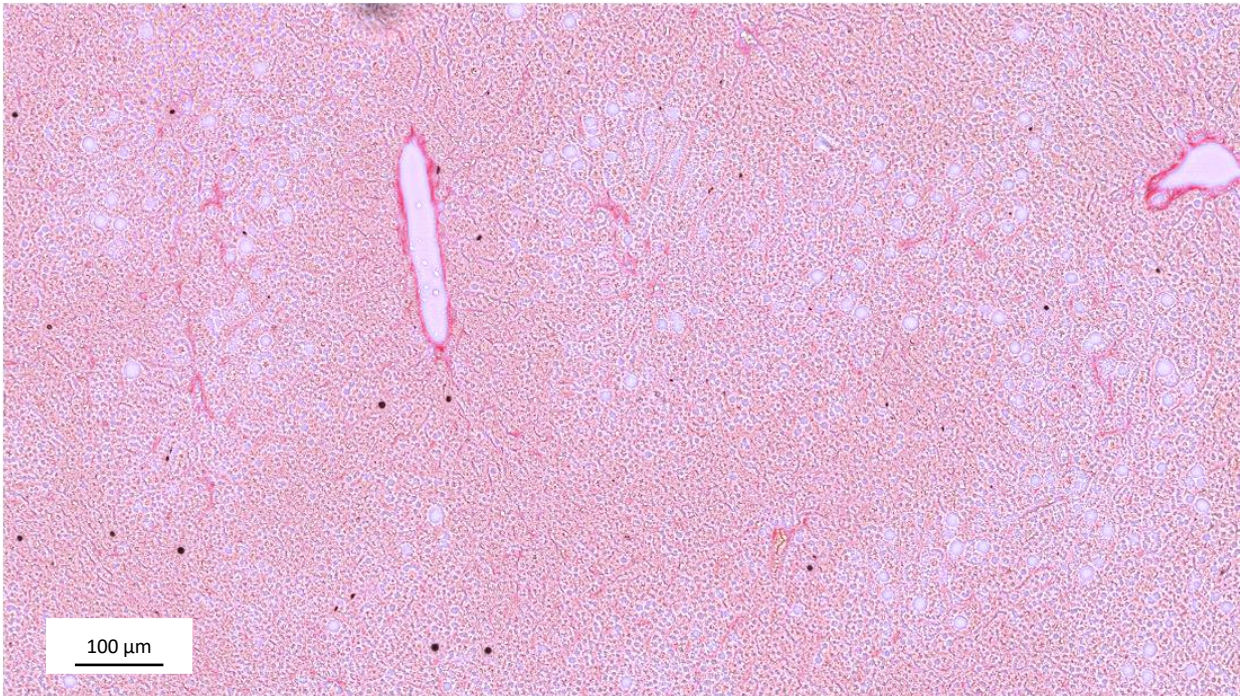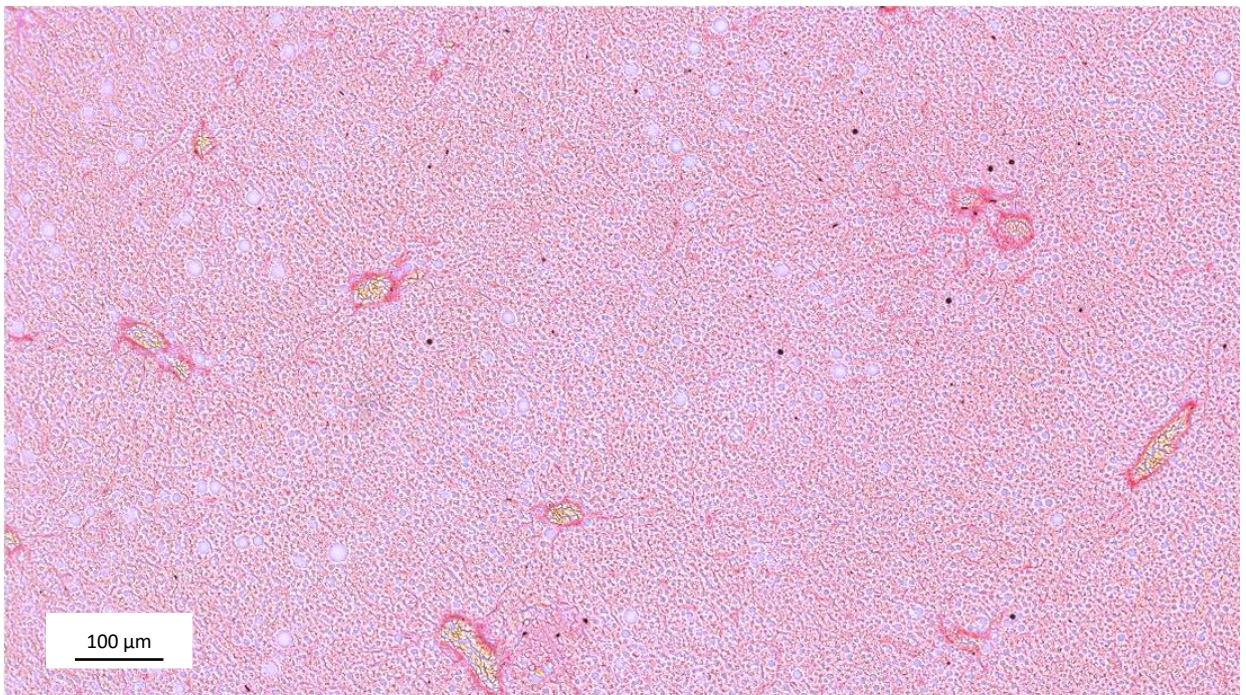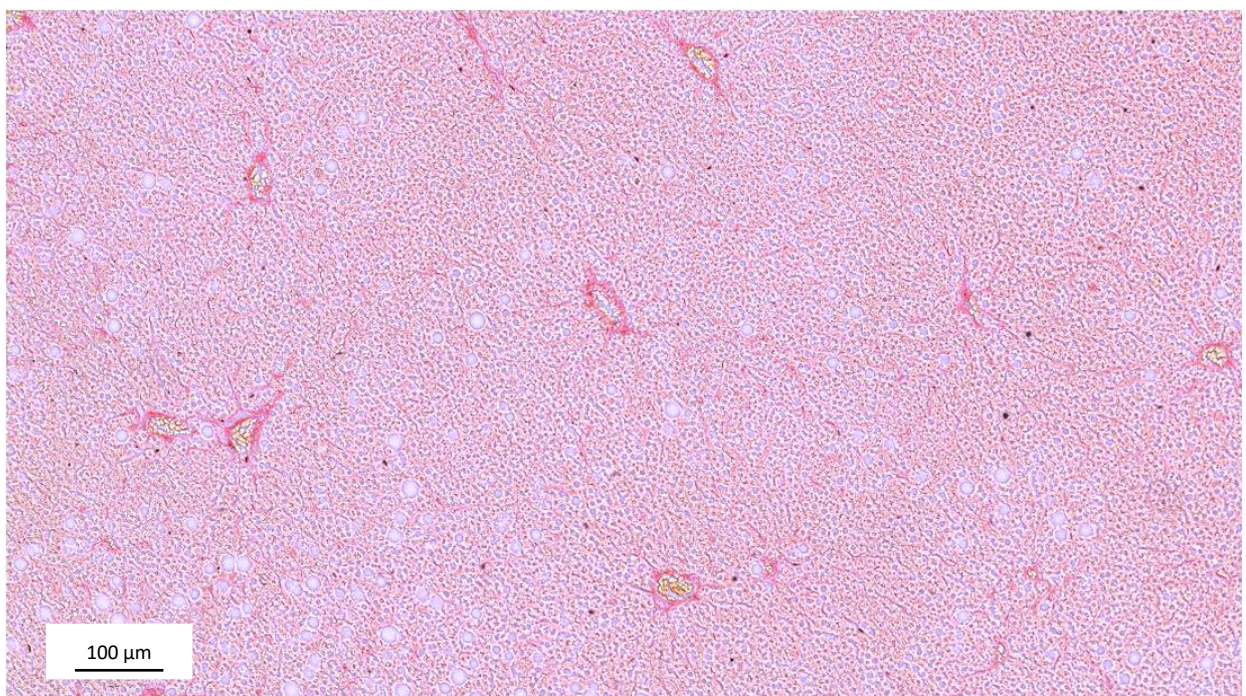

# CDHFD-I-4

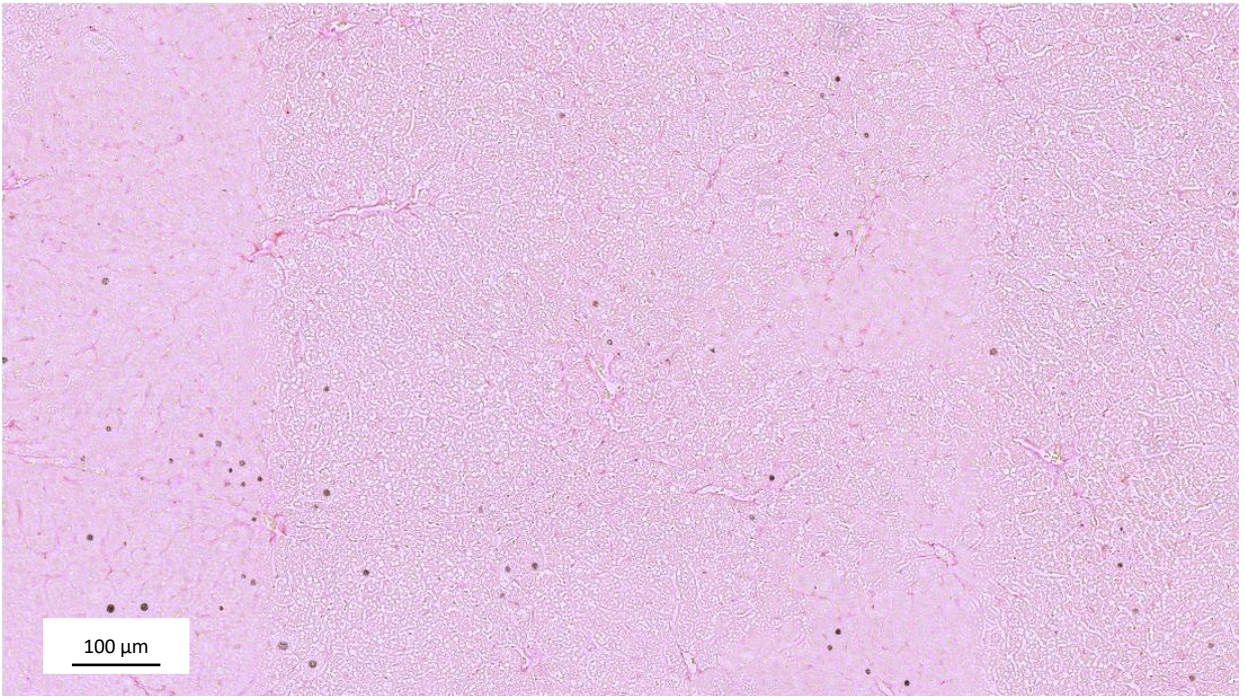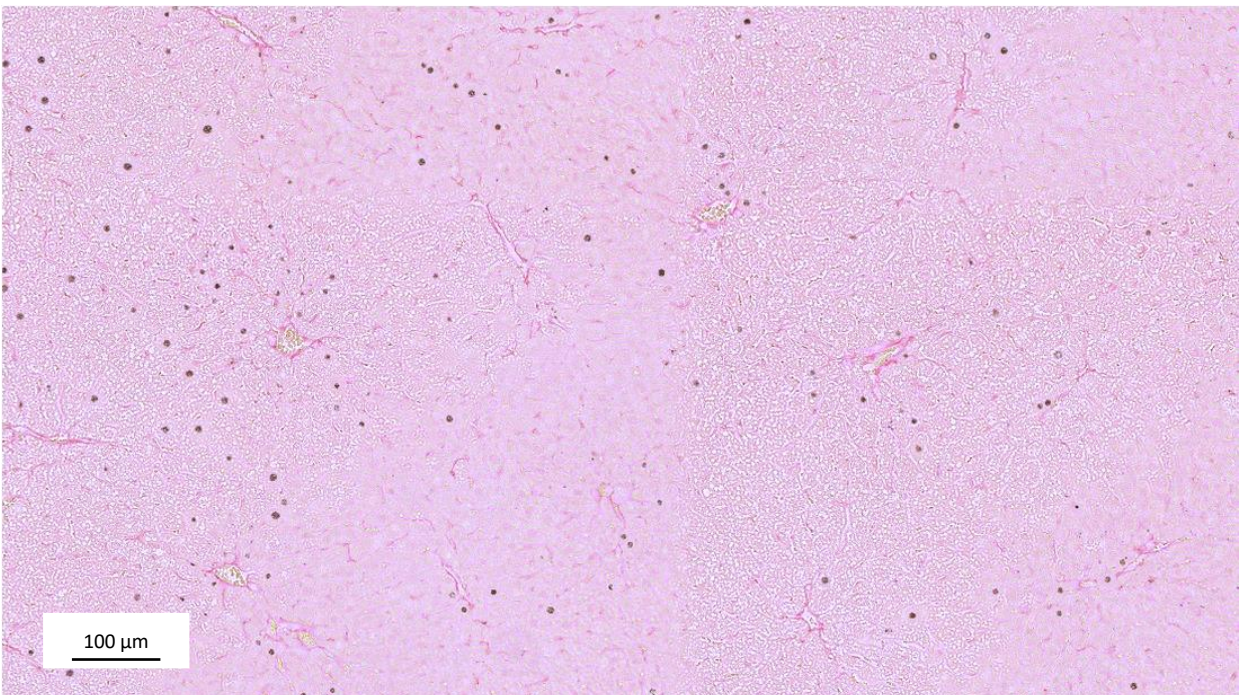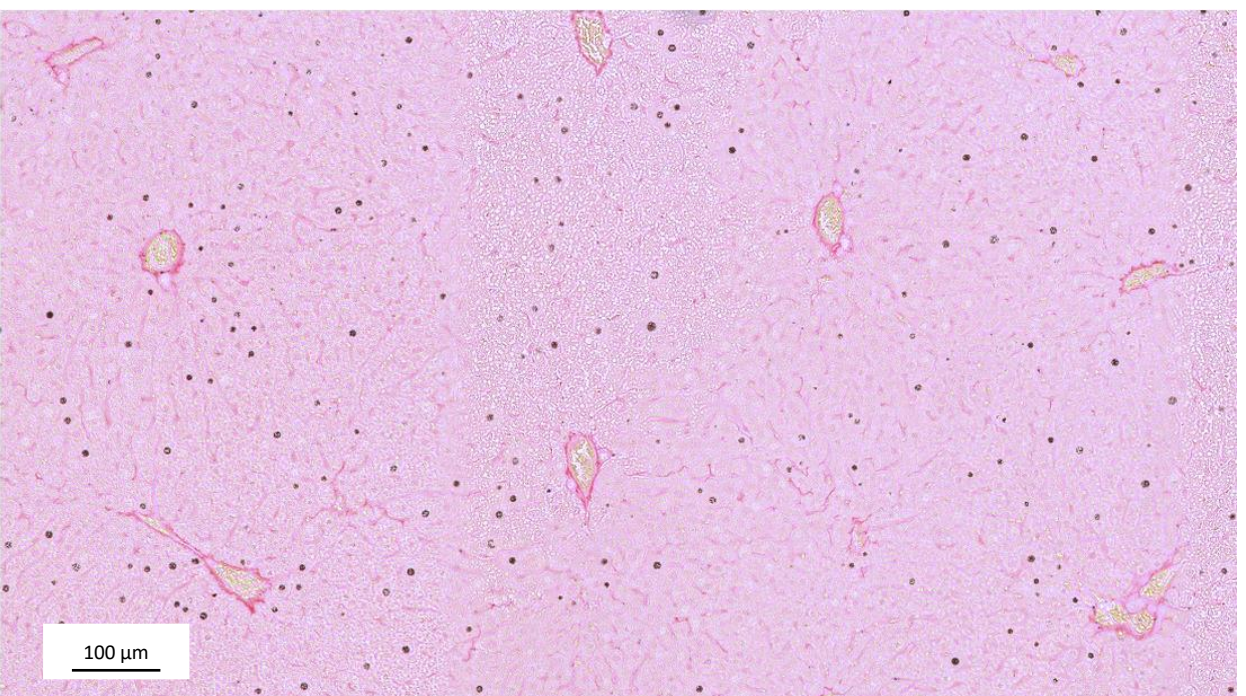



# CDHFD-I-5

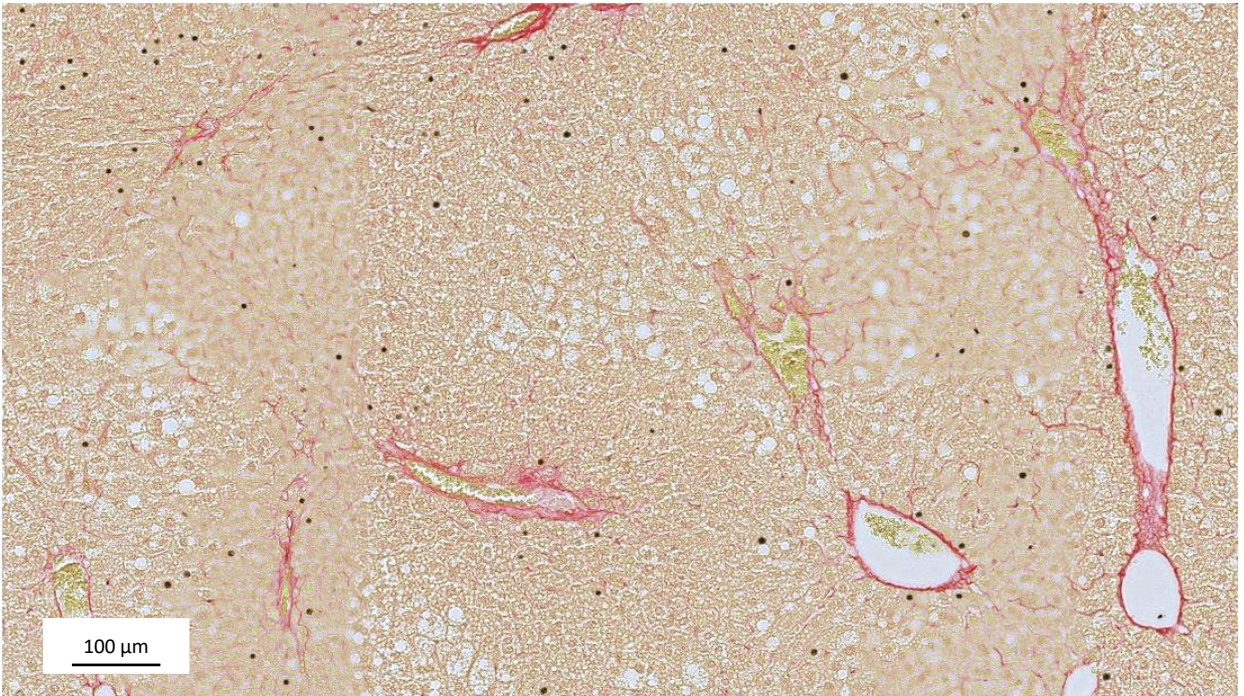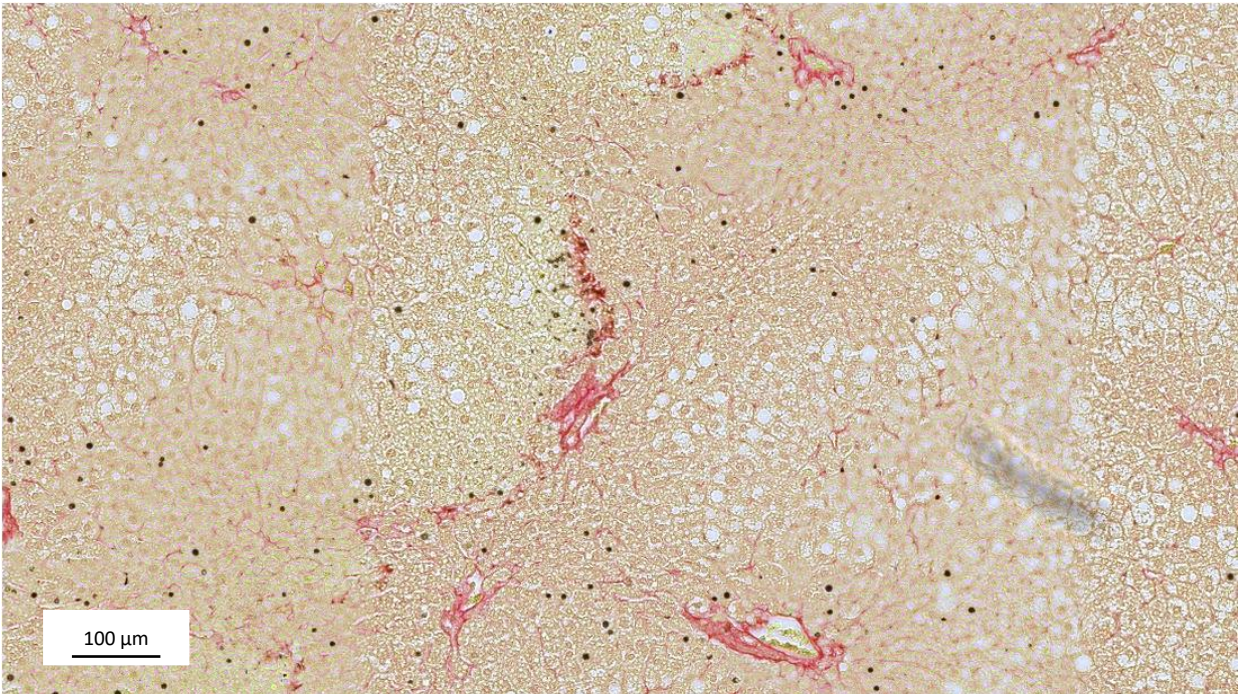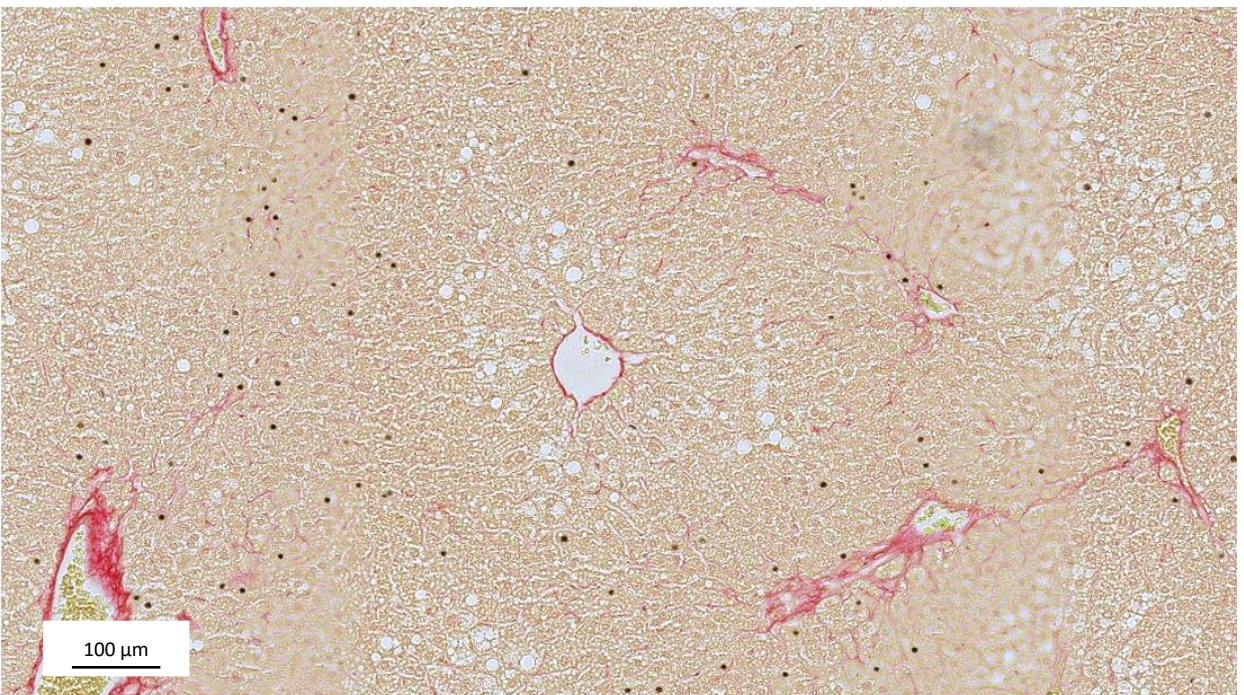

# CDHFD-I-6

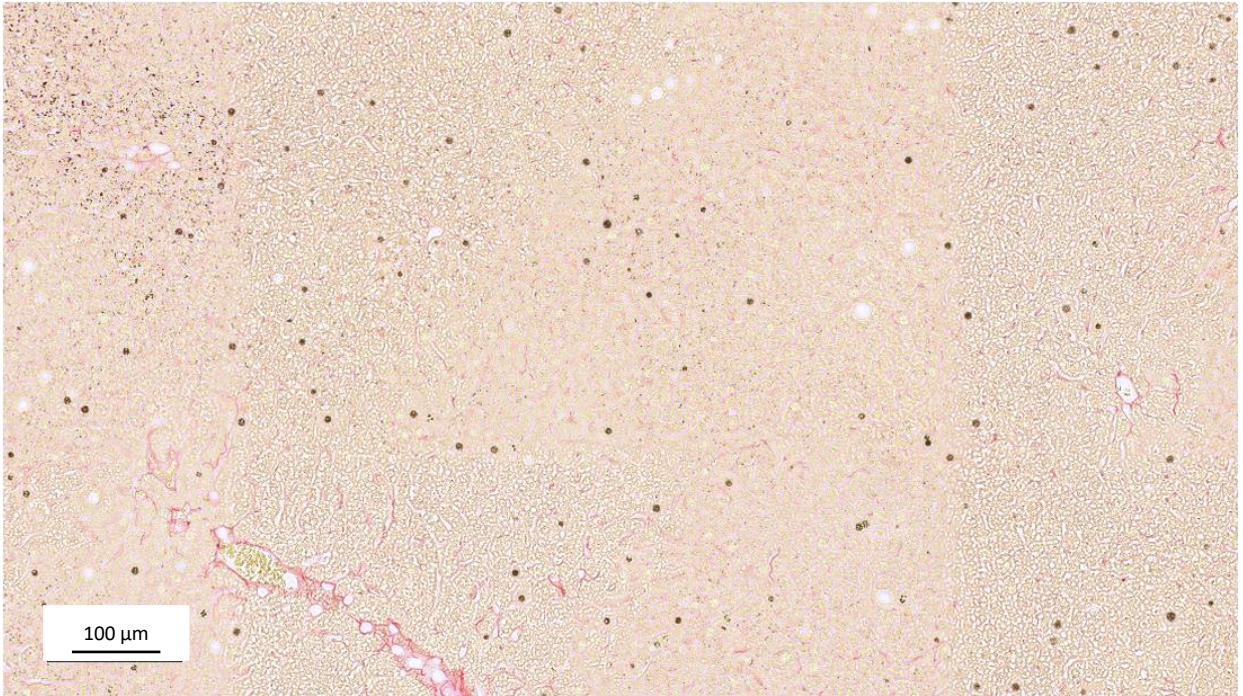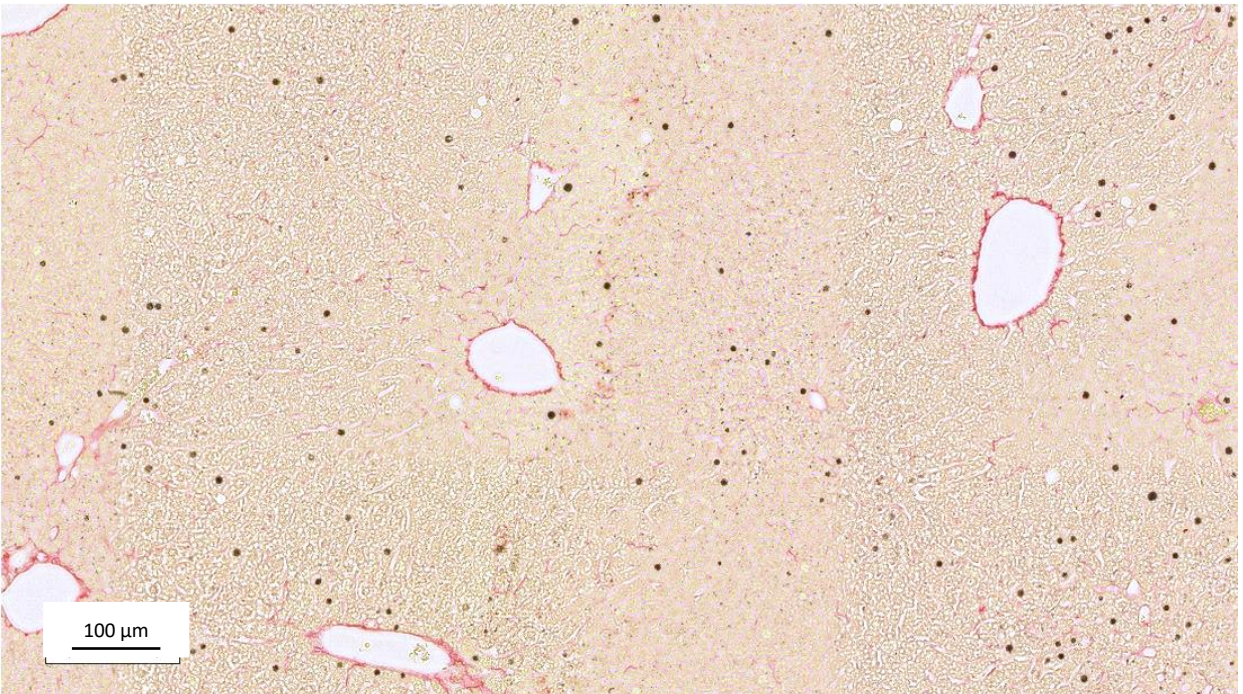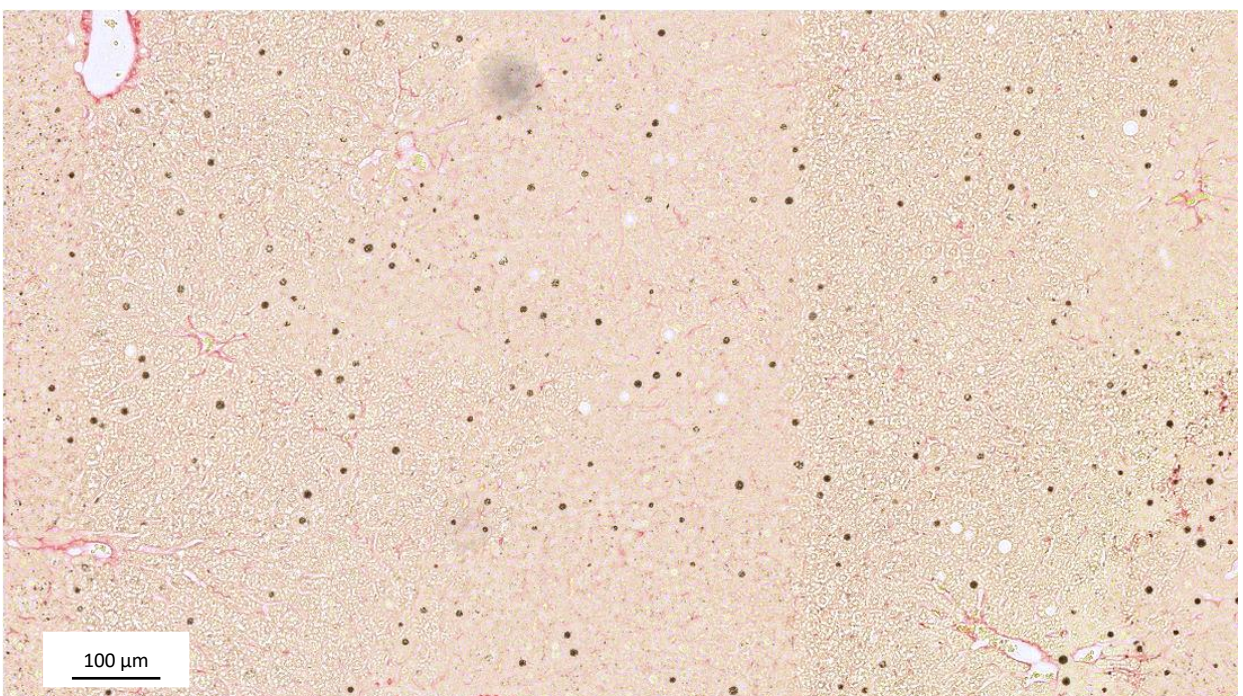

# CDHFD-I-7

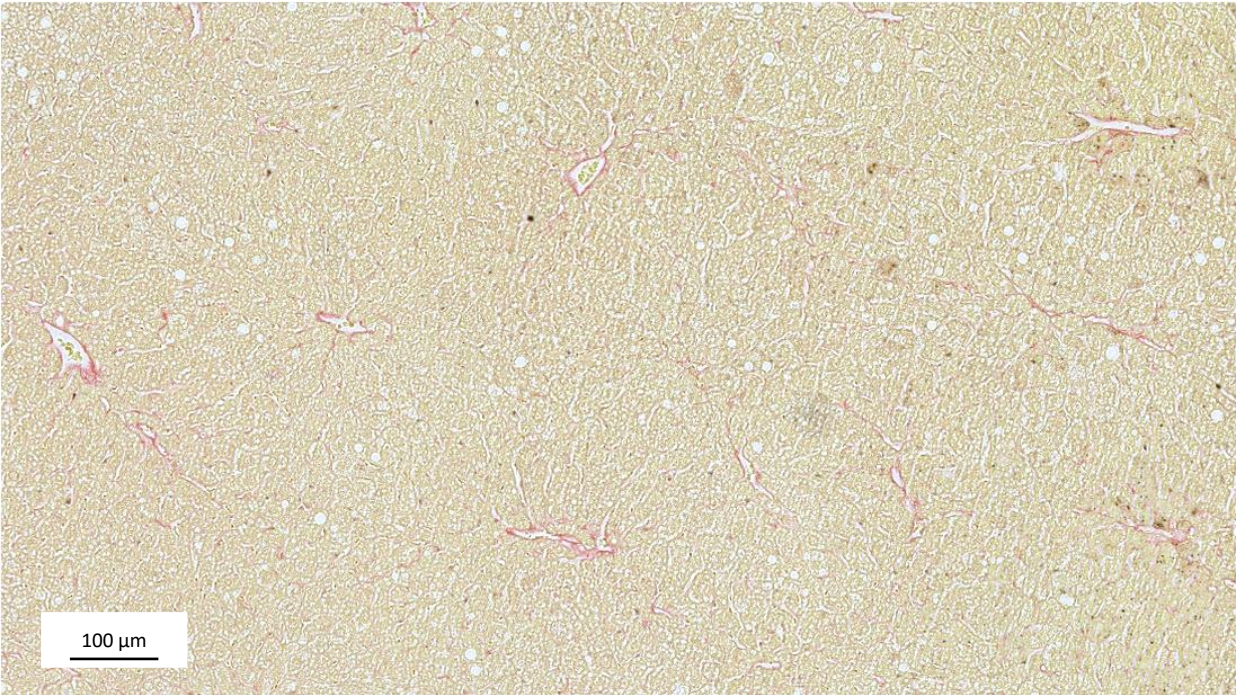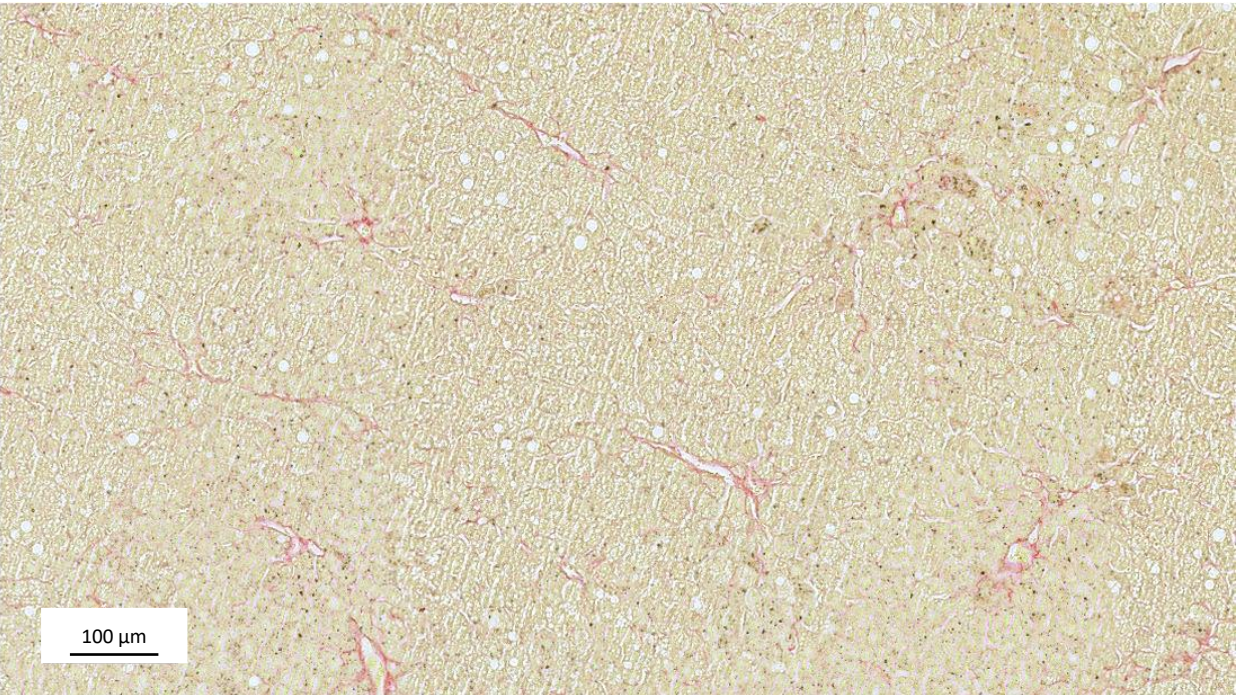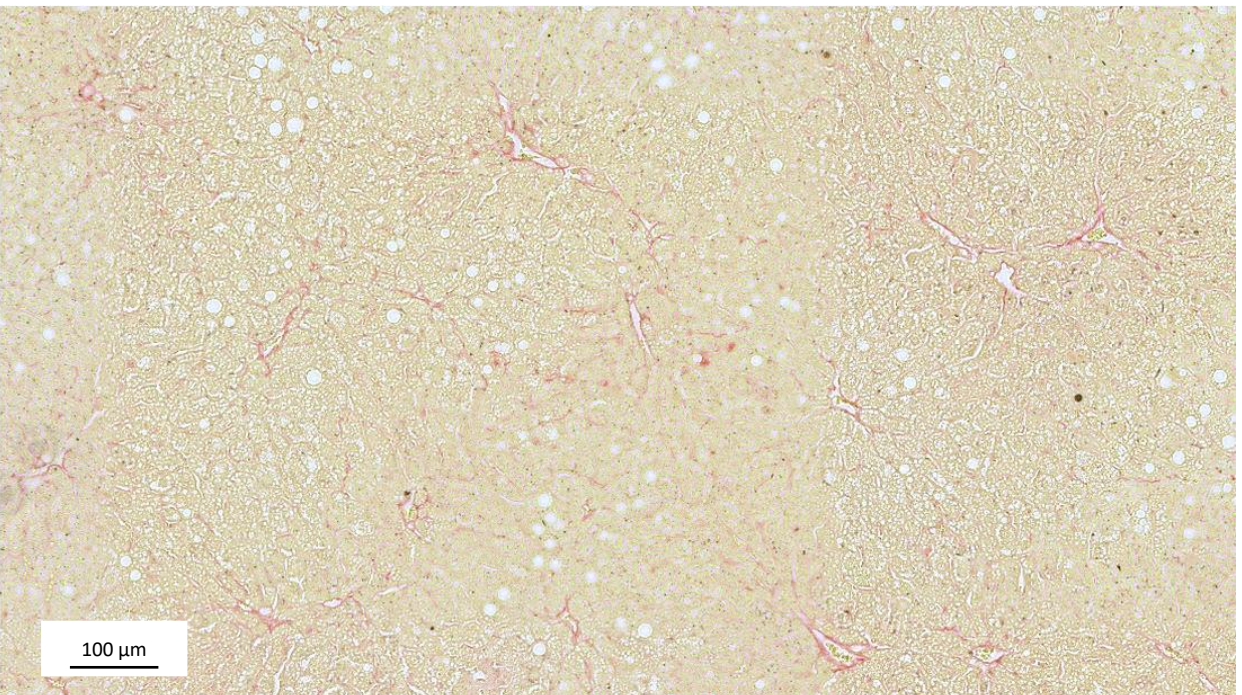

# CDHFD-I-8

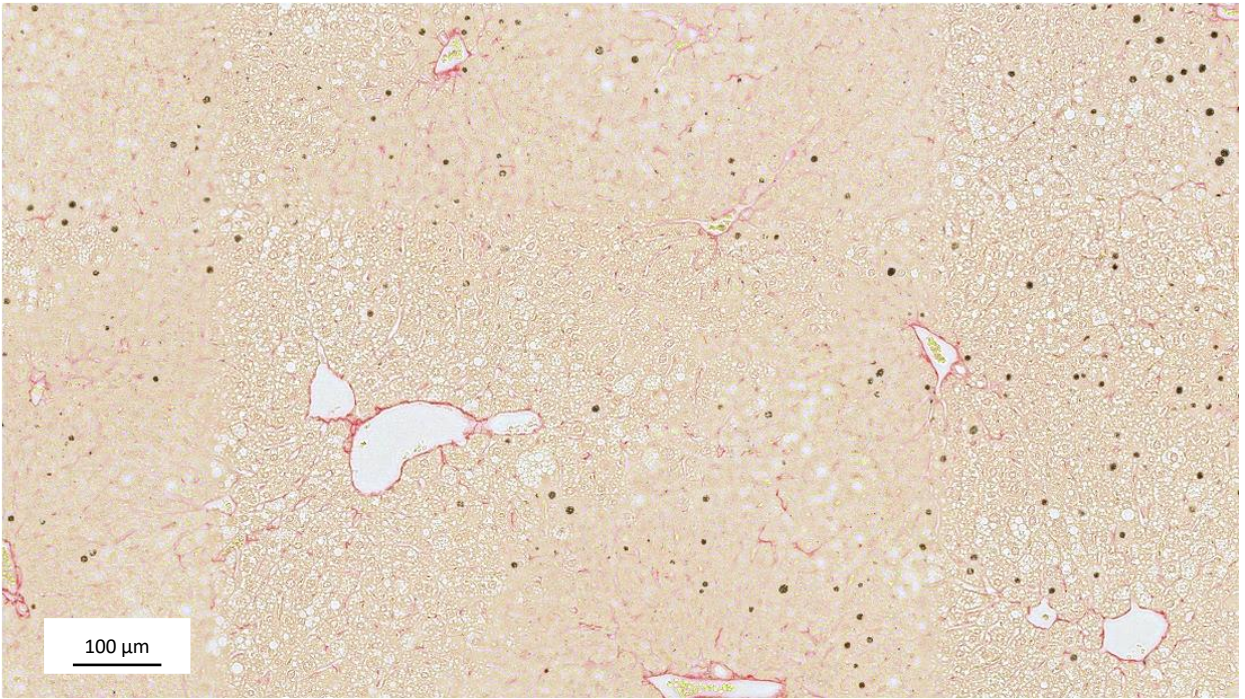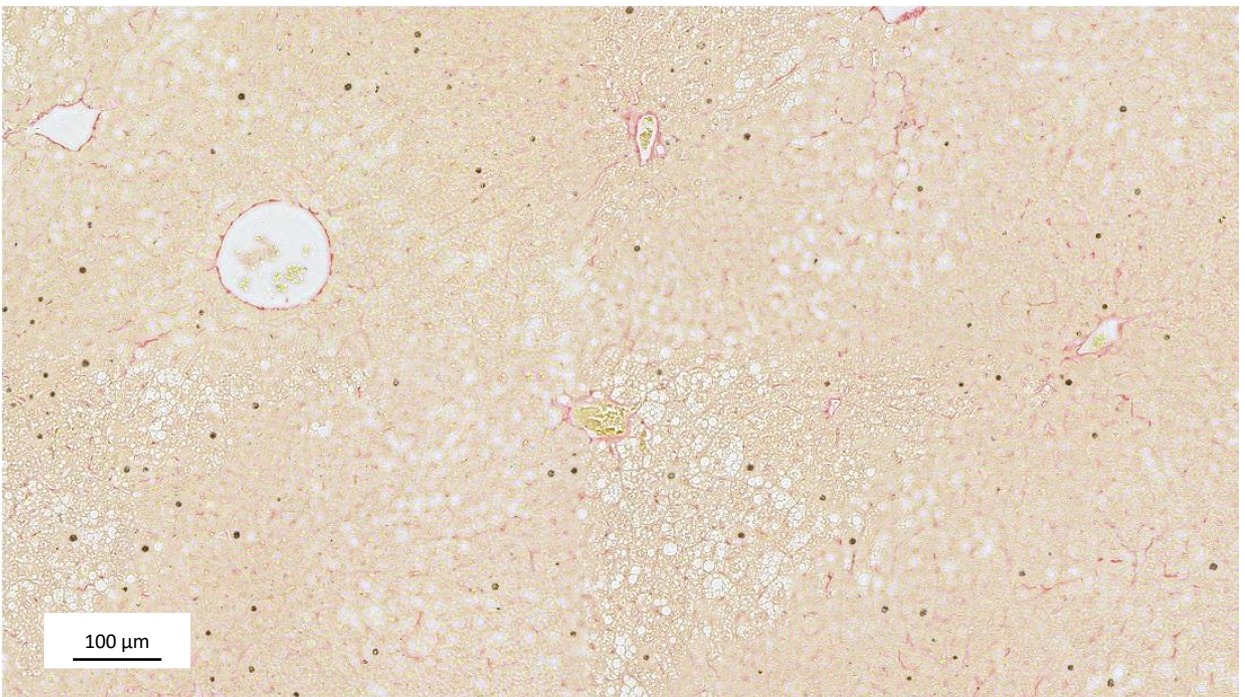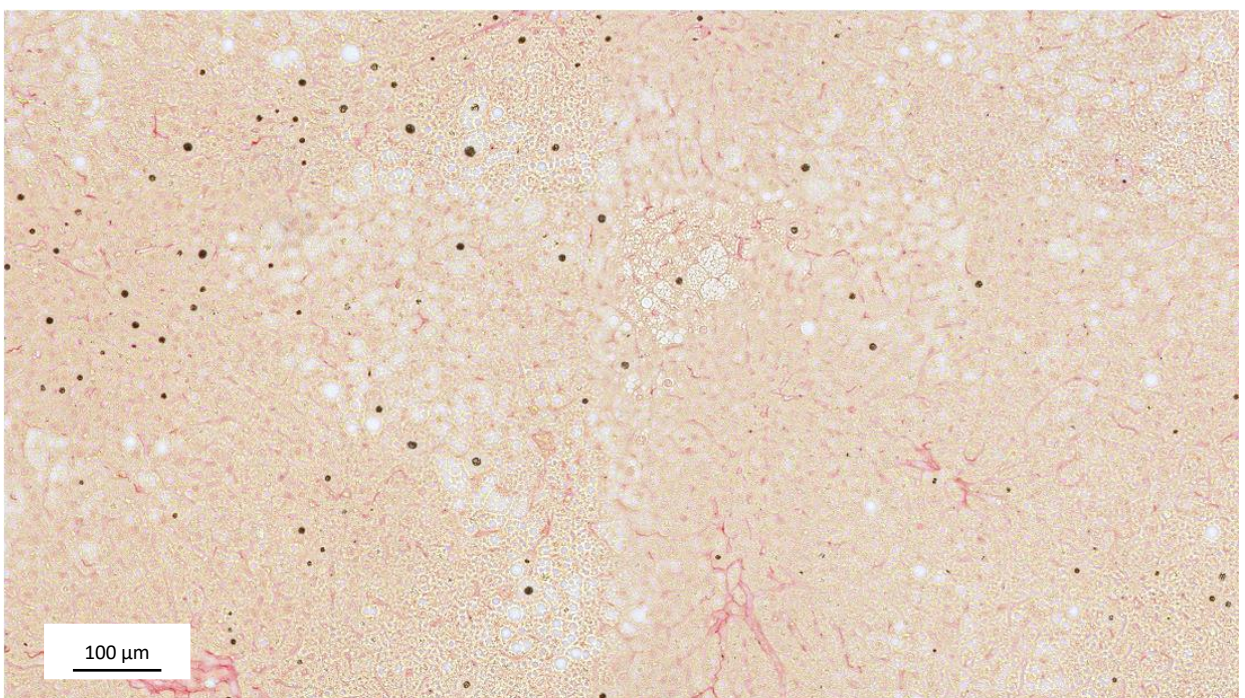

# CDHFD-I-9

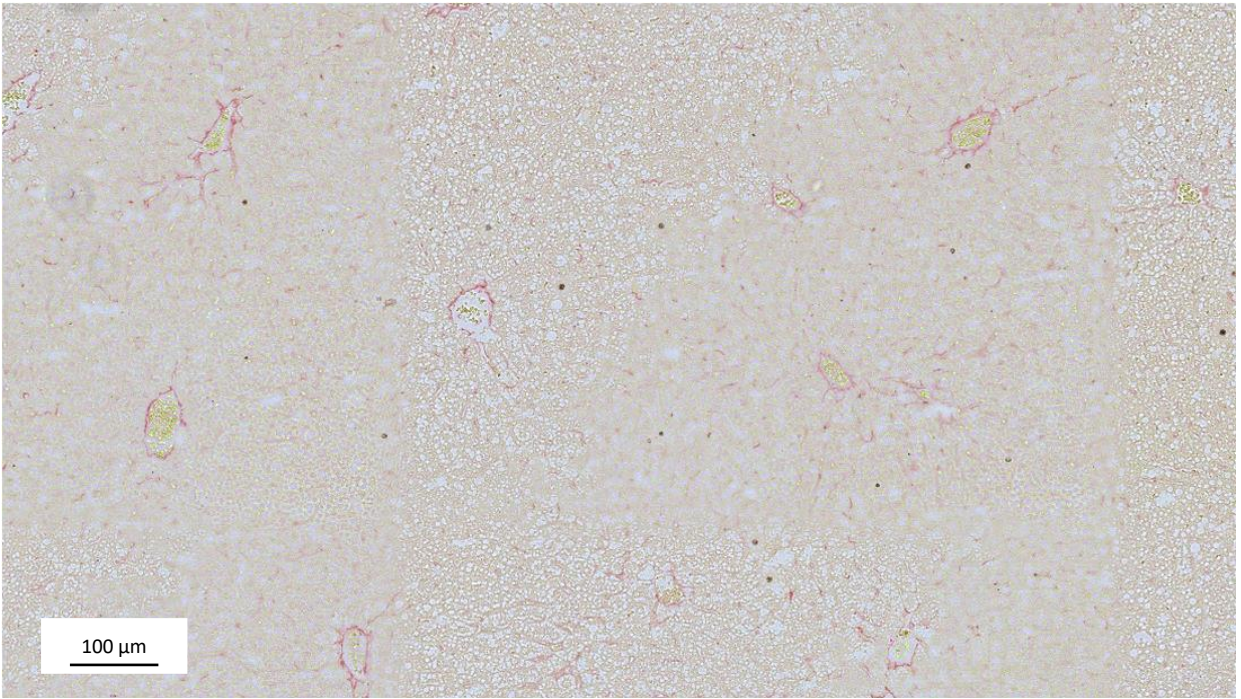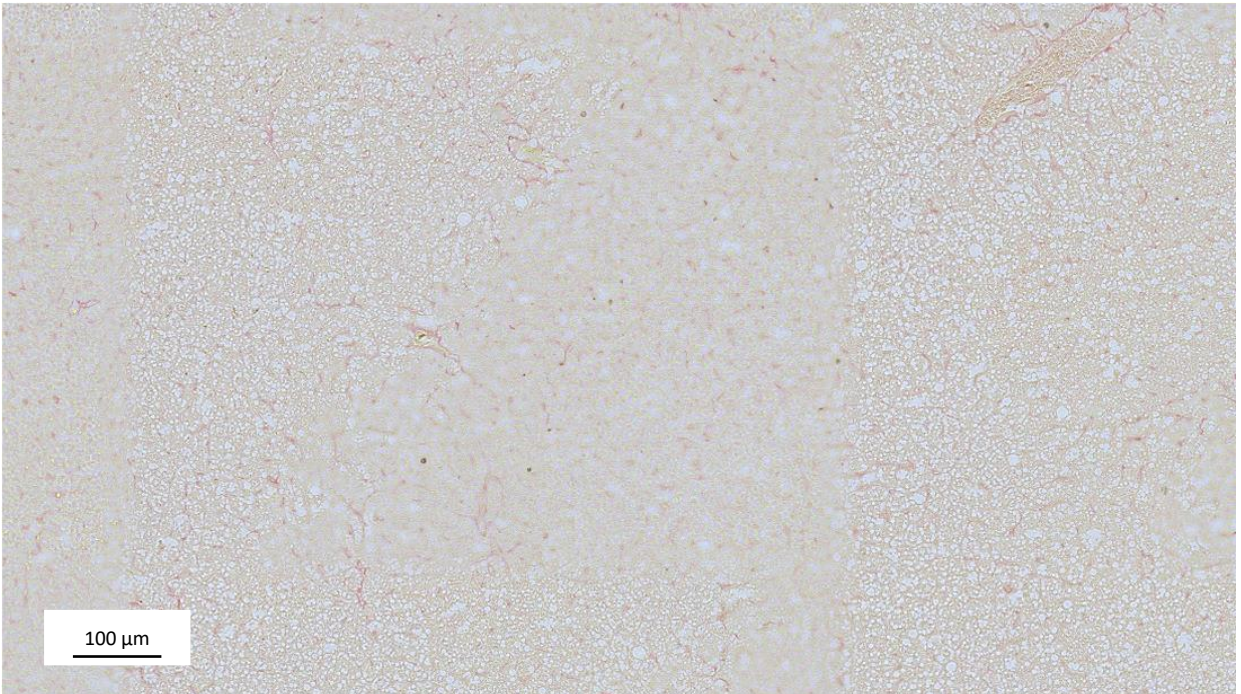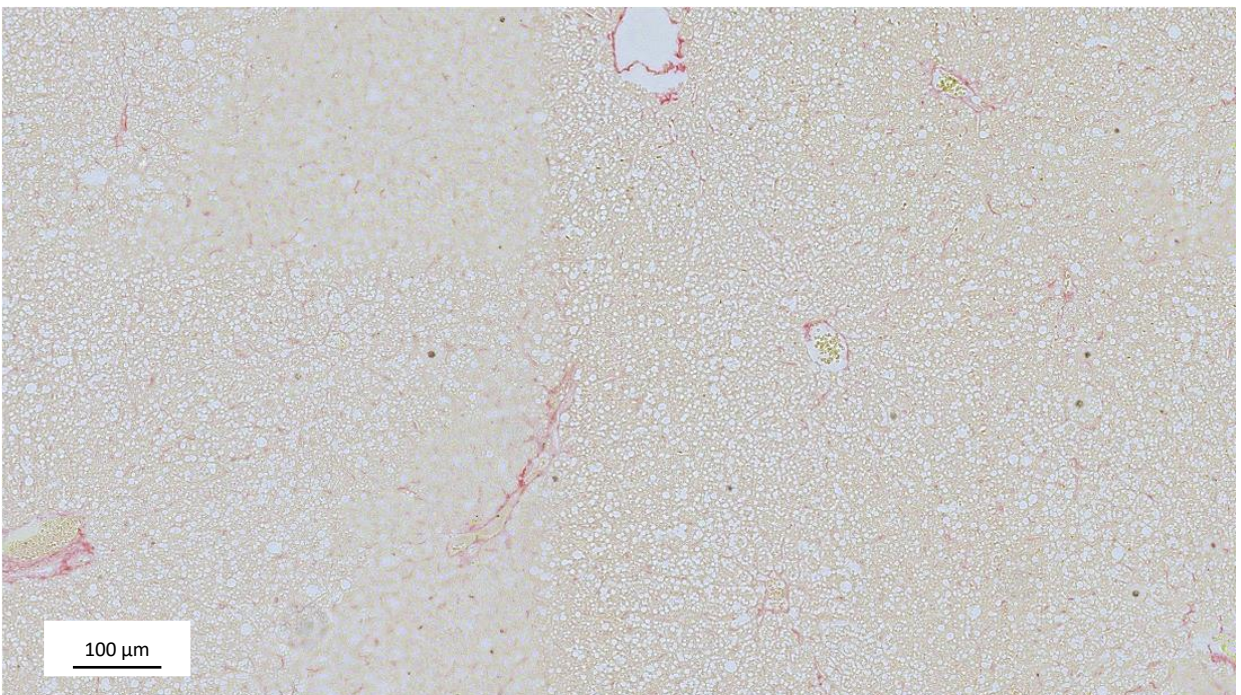

# CDHFD-I-10

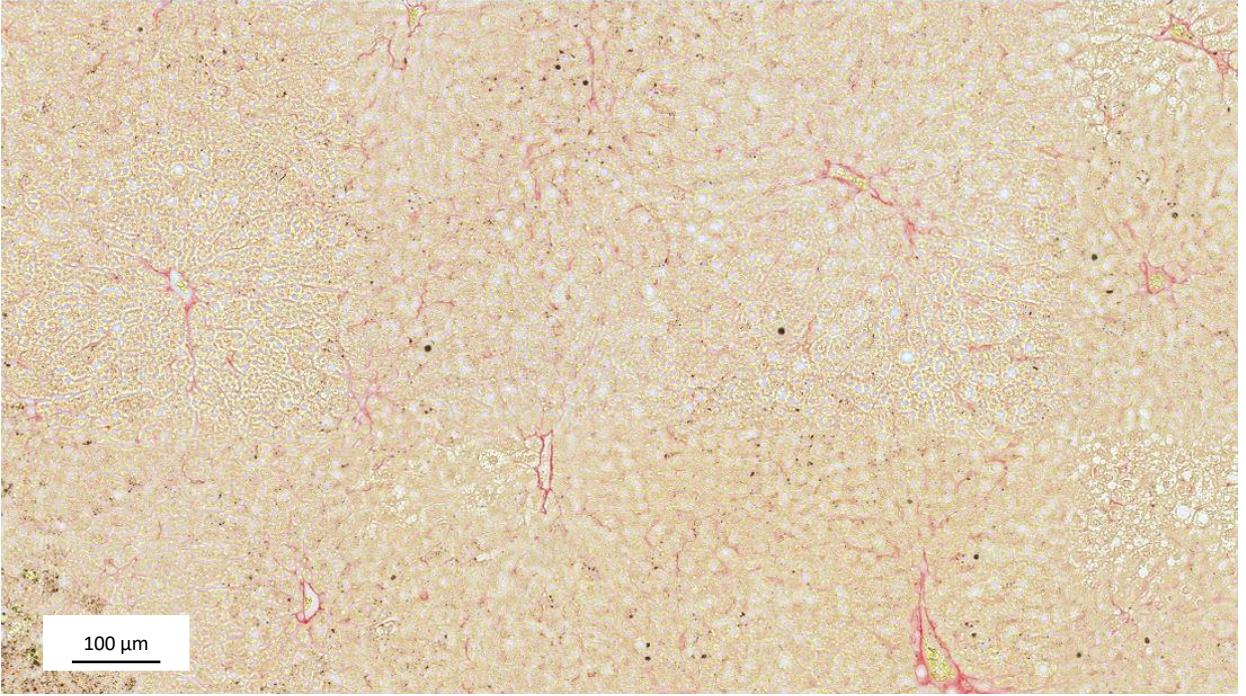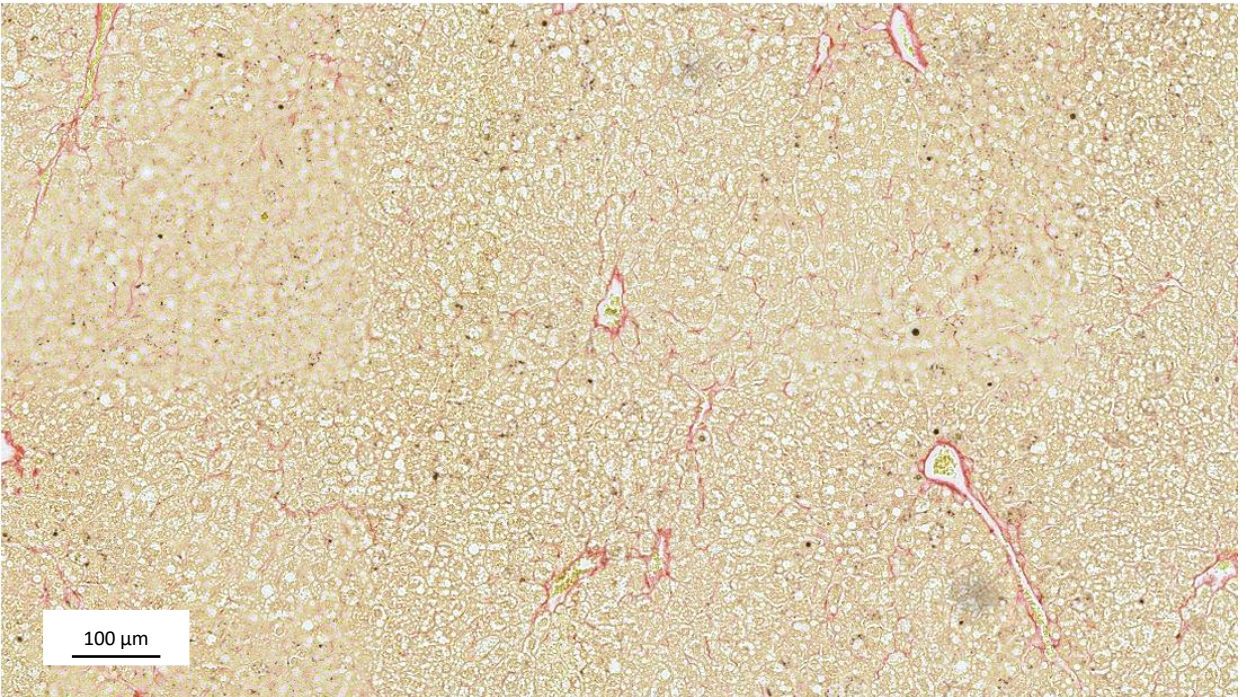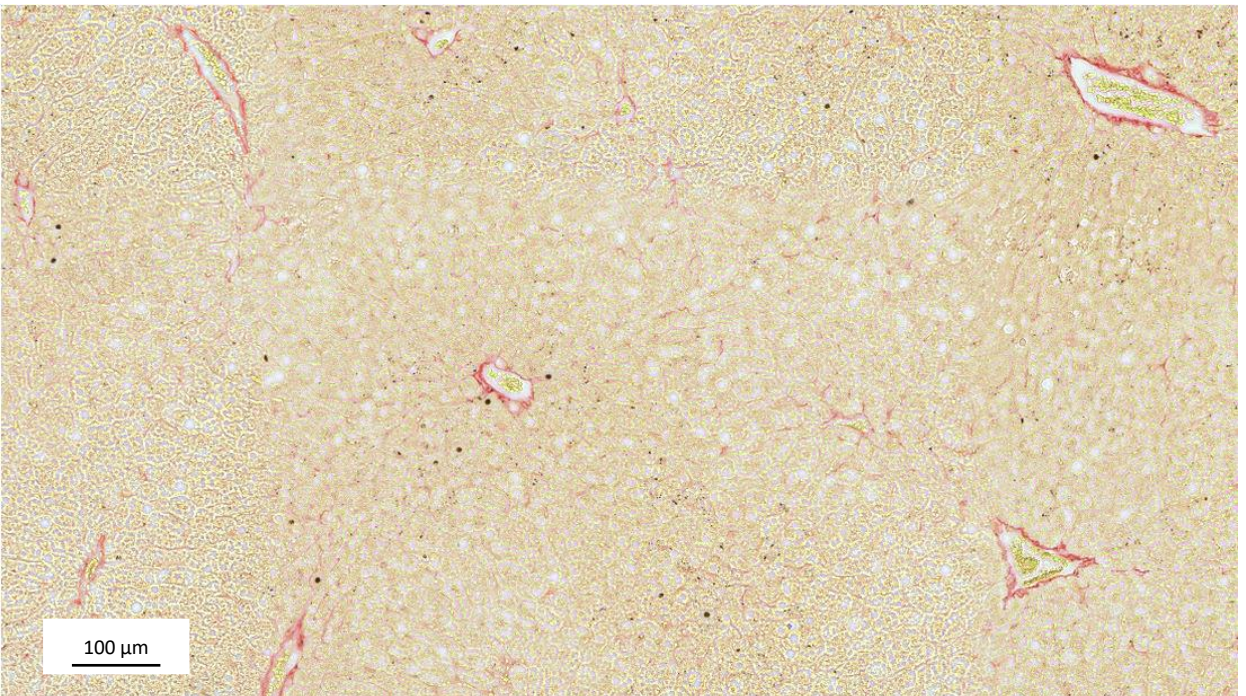

CDHFD-I-11

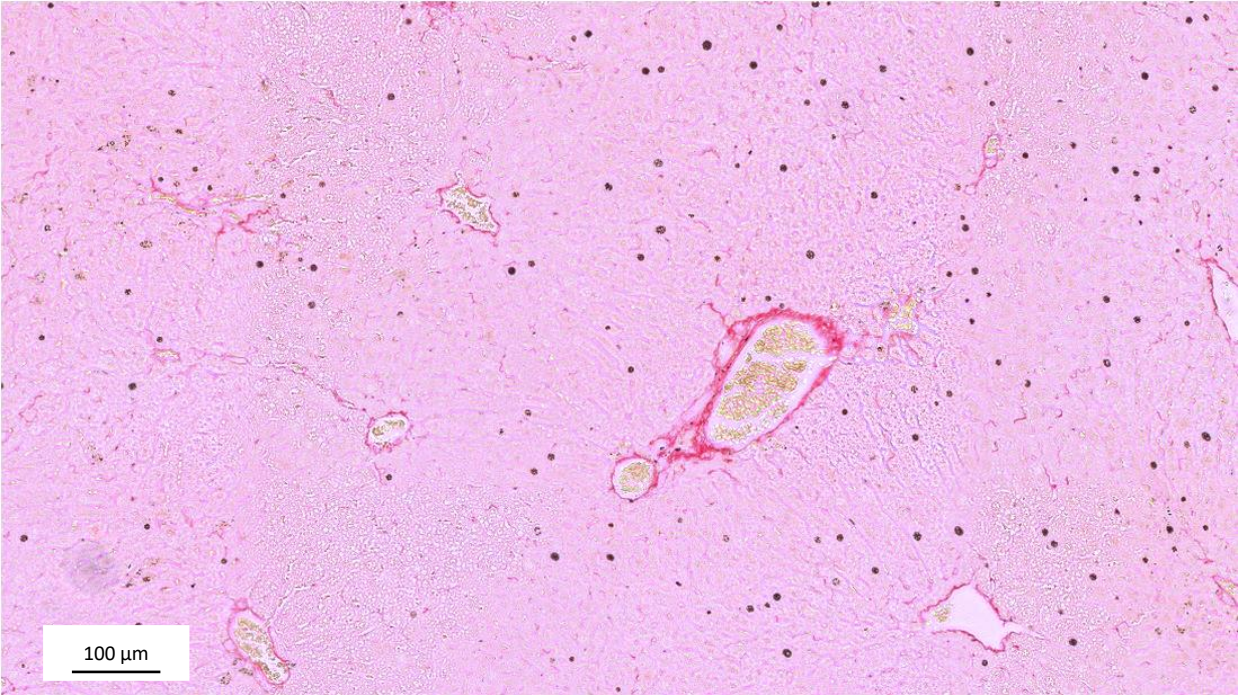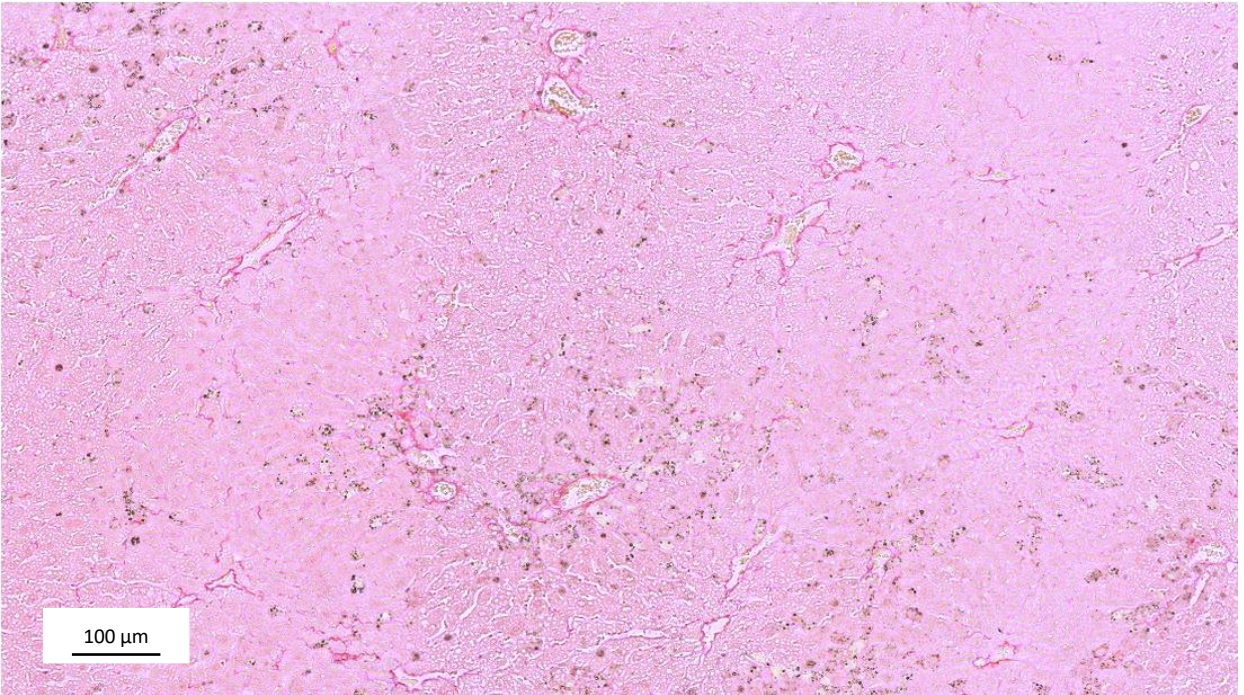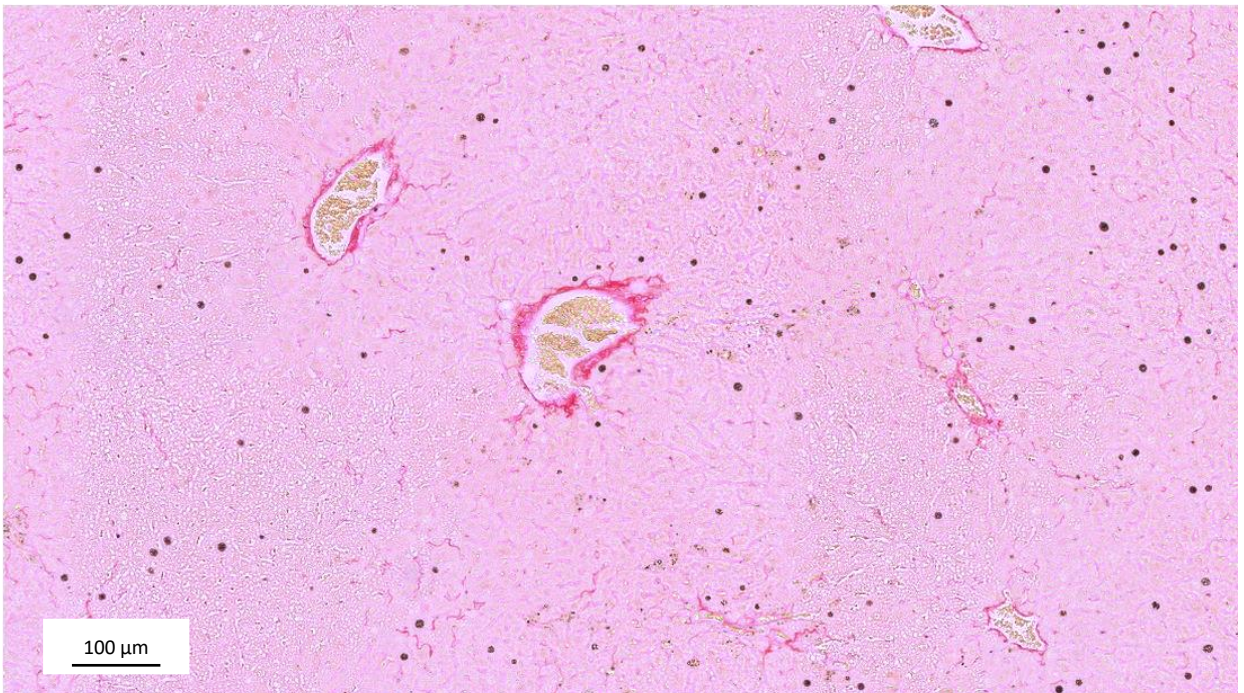

CDHFD-I-12

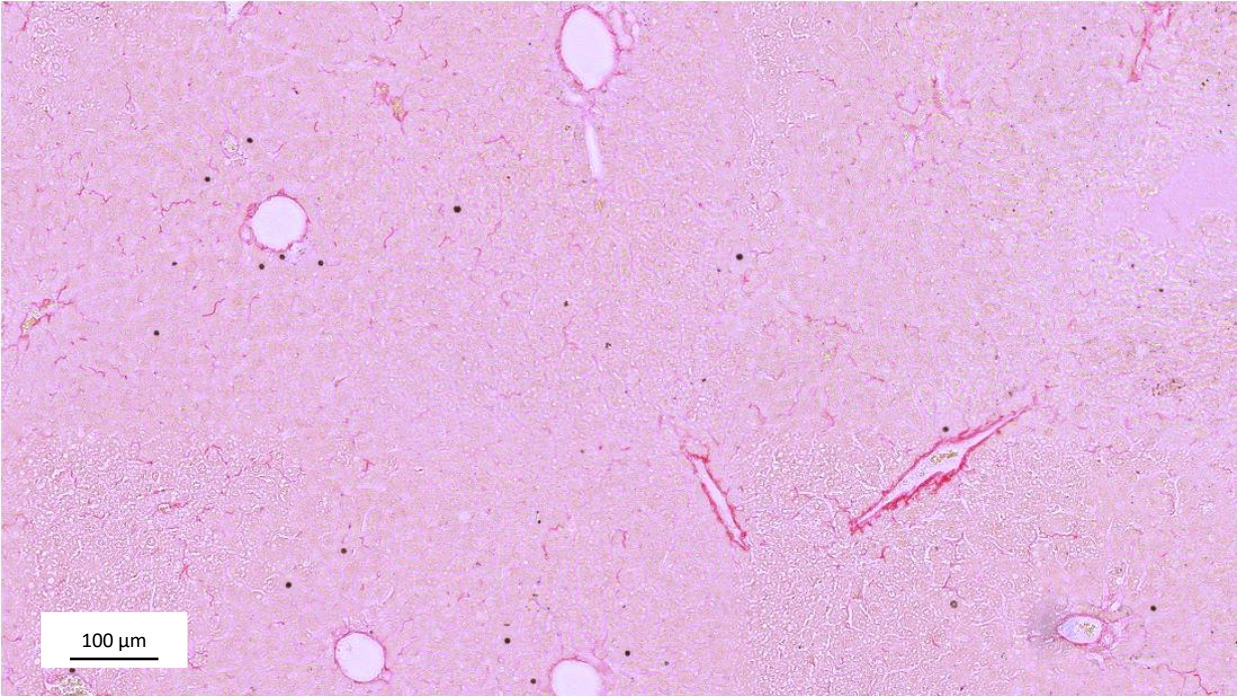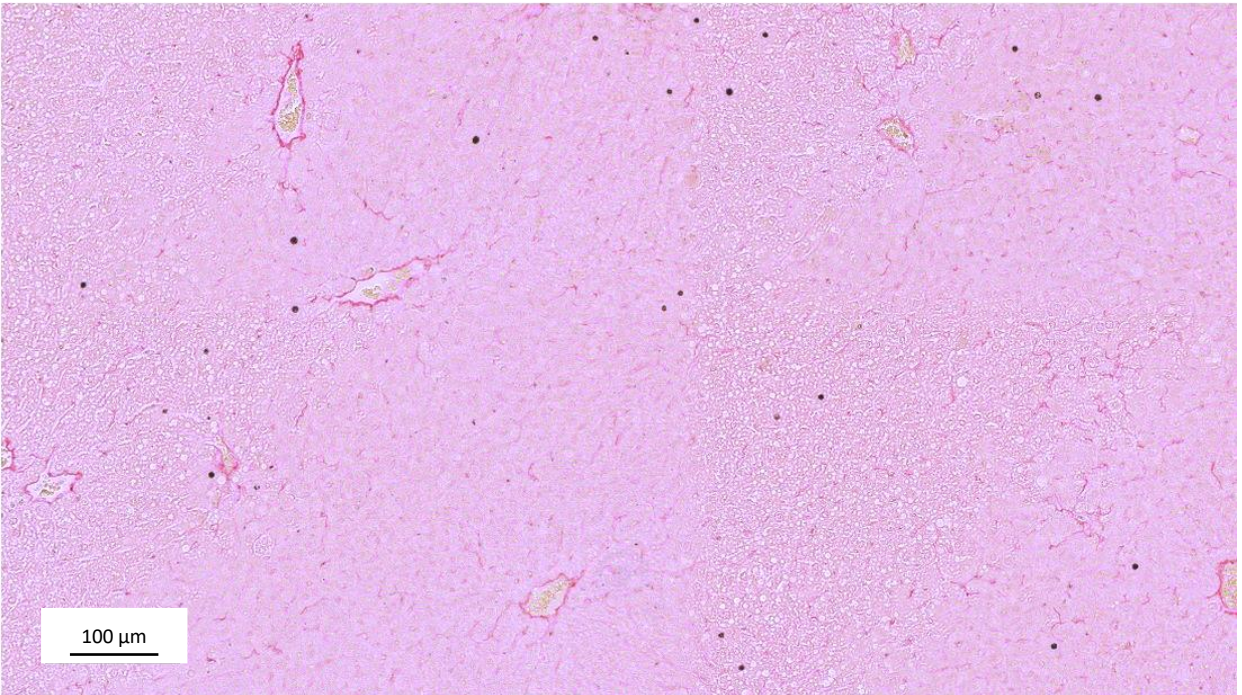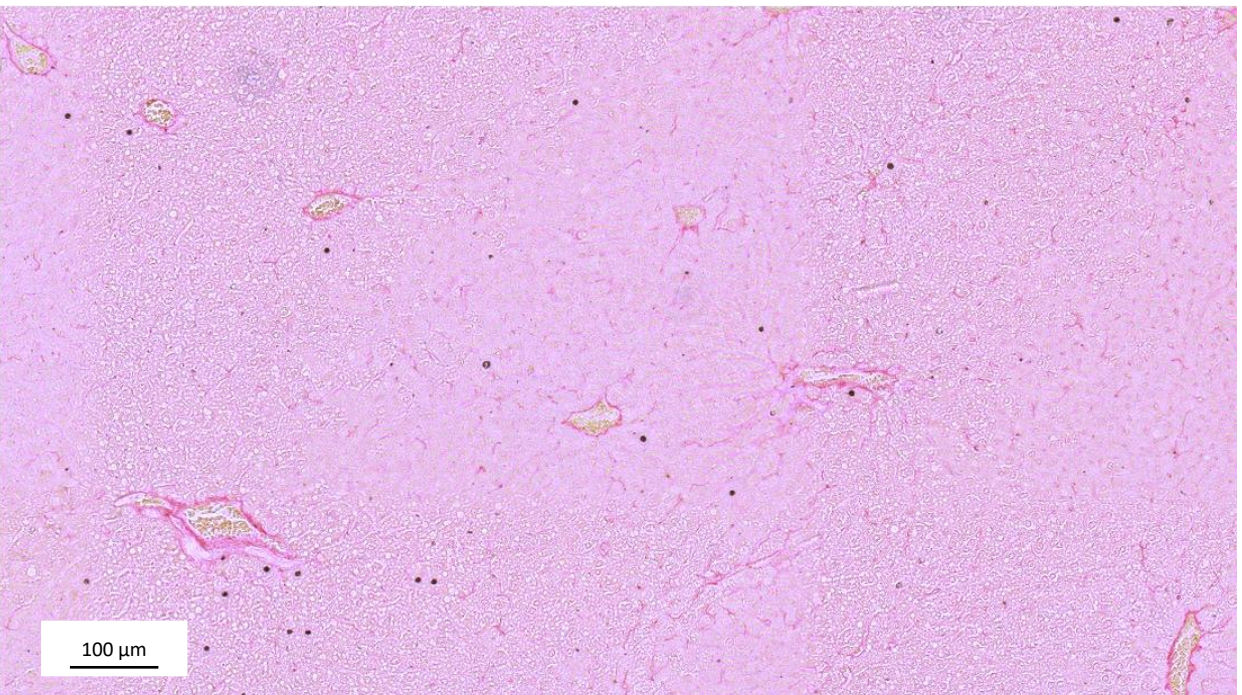



# CDHFD-I-13

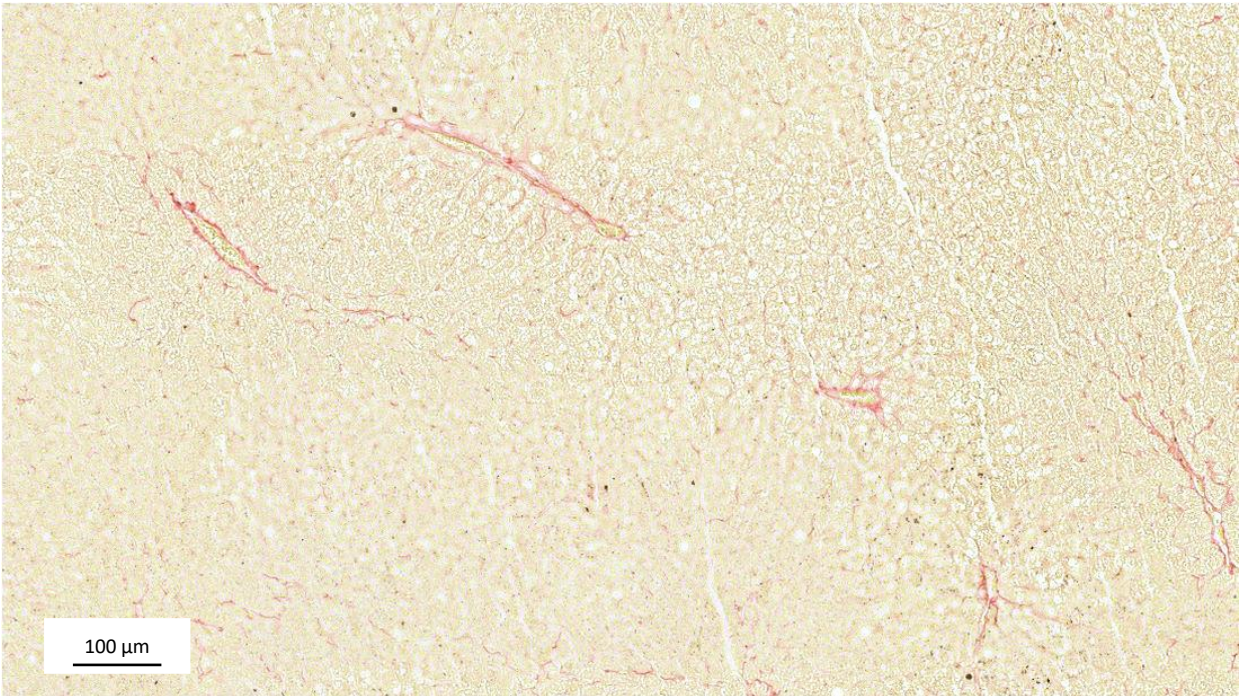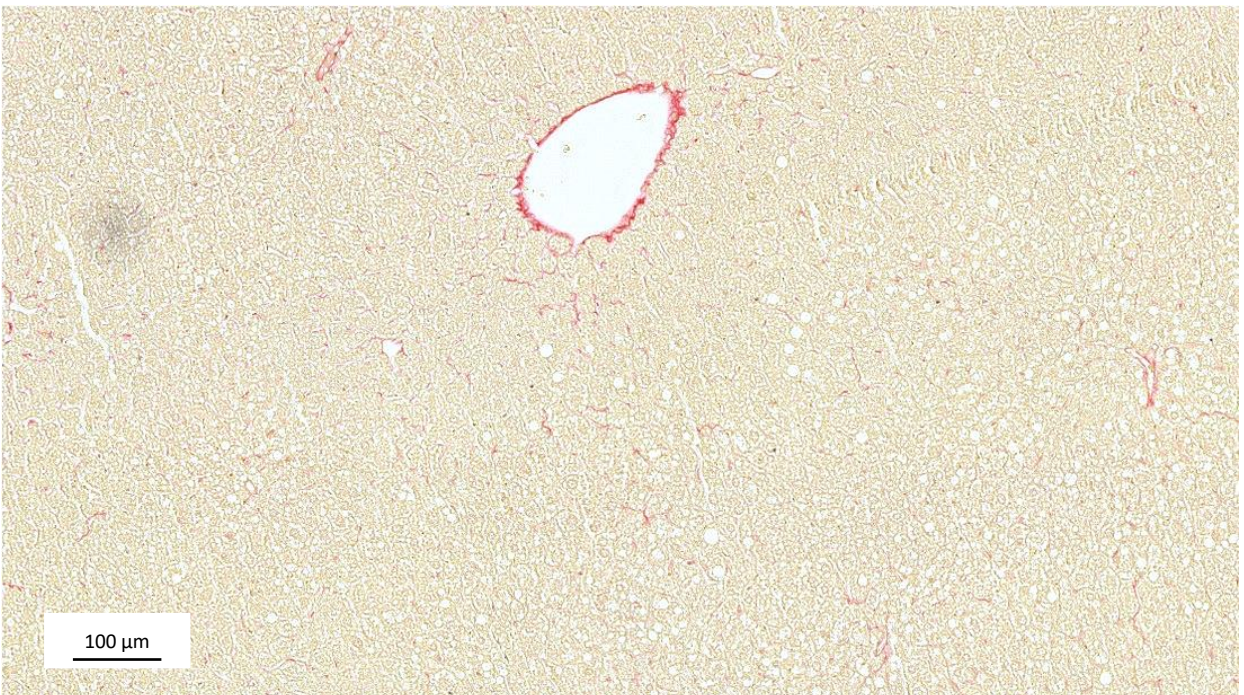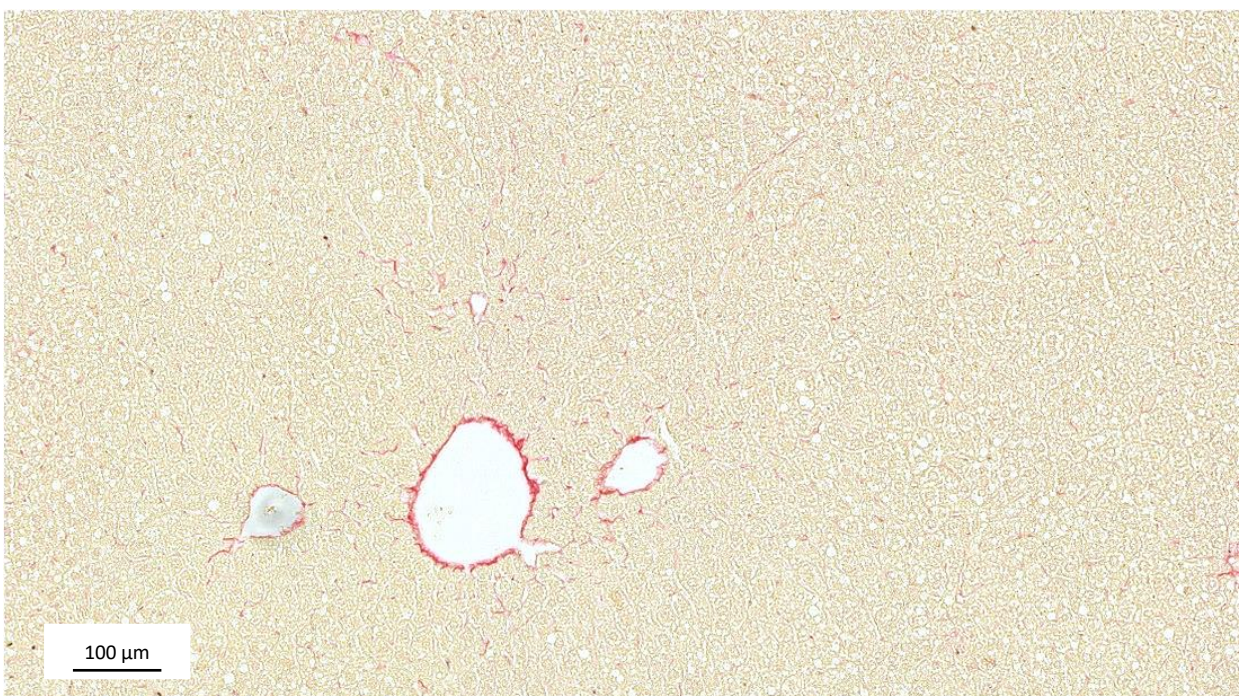

CDHFD-I-14

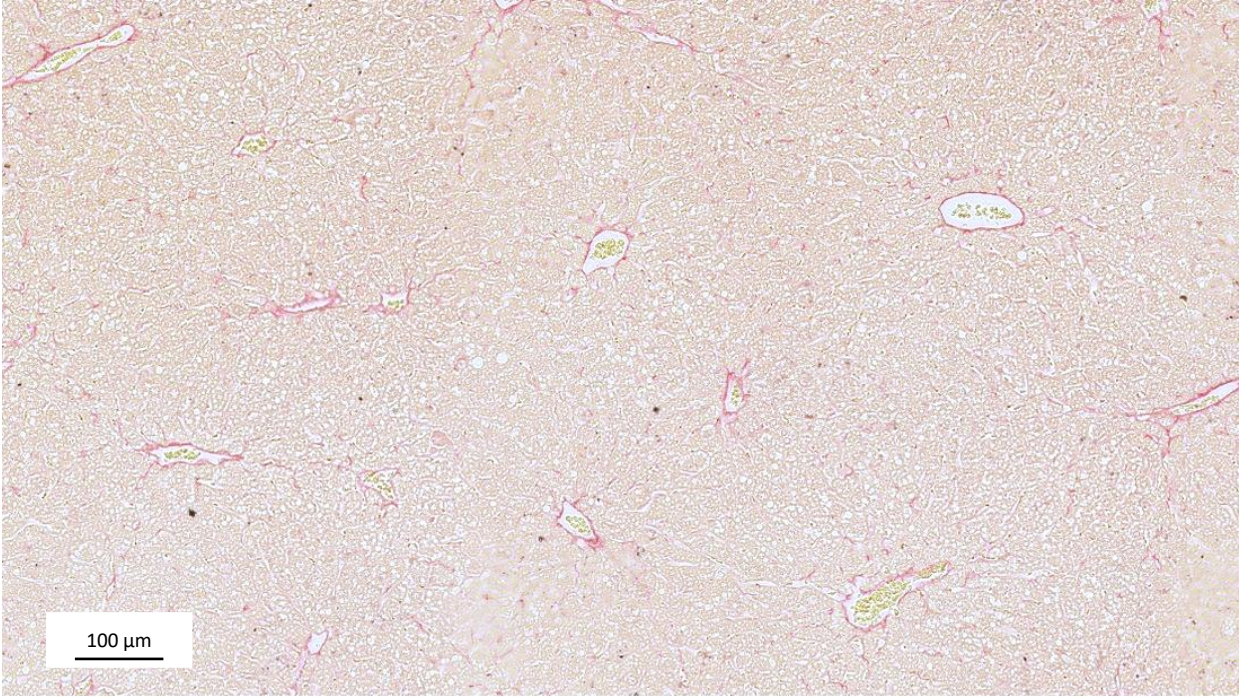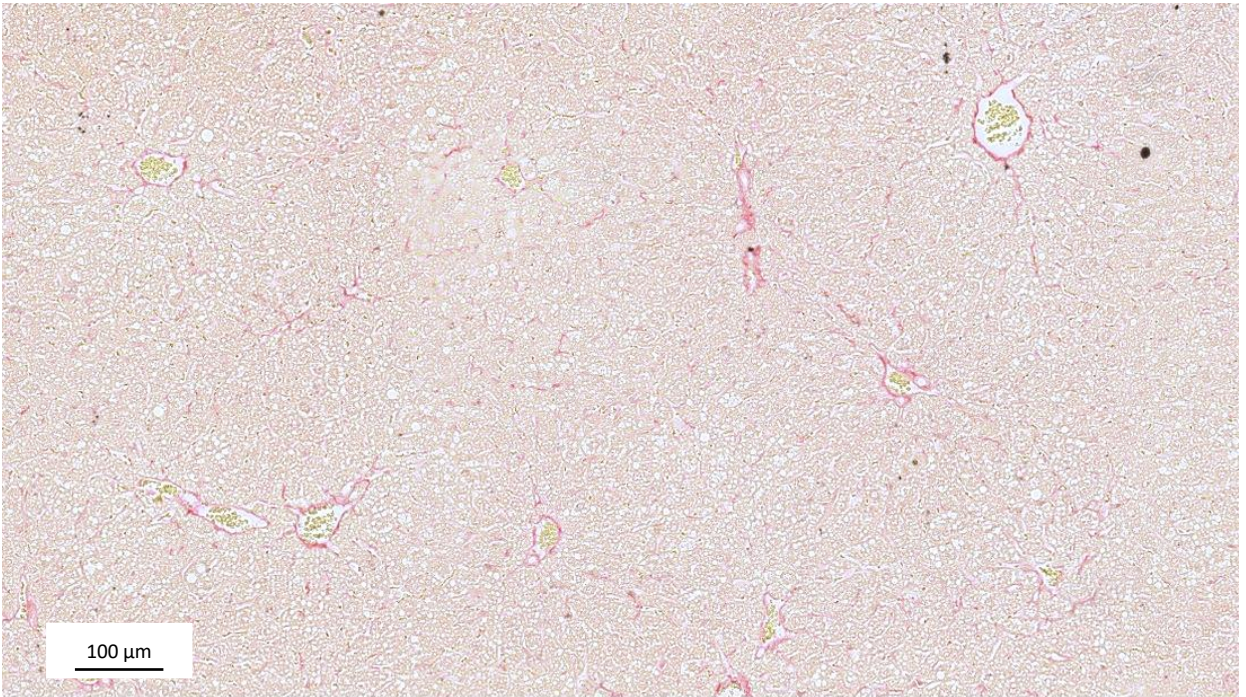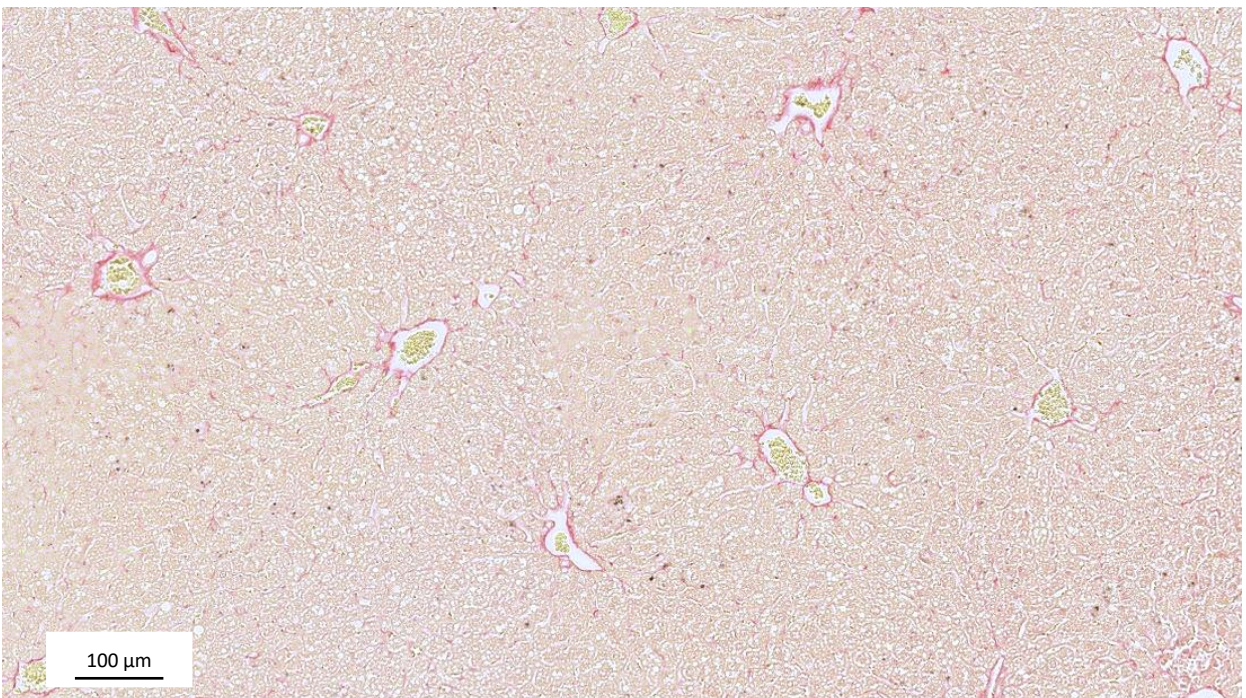

CDHFD-I-15

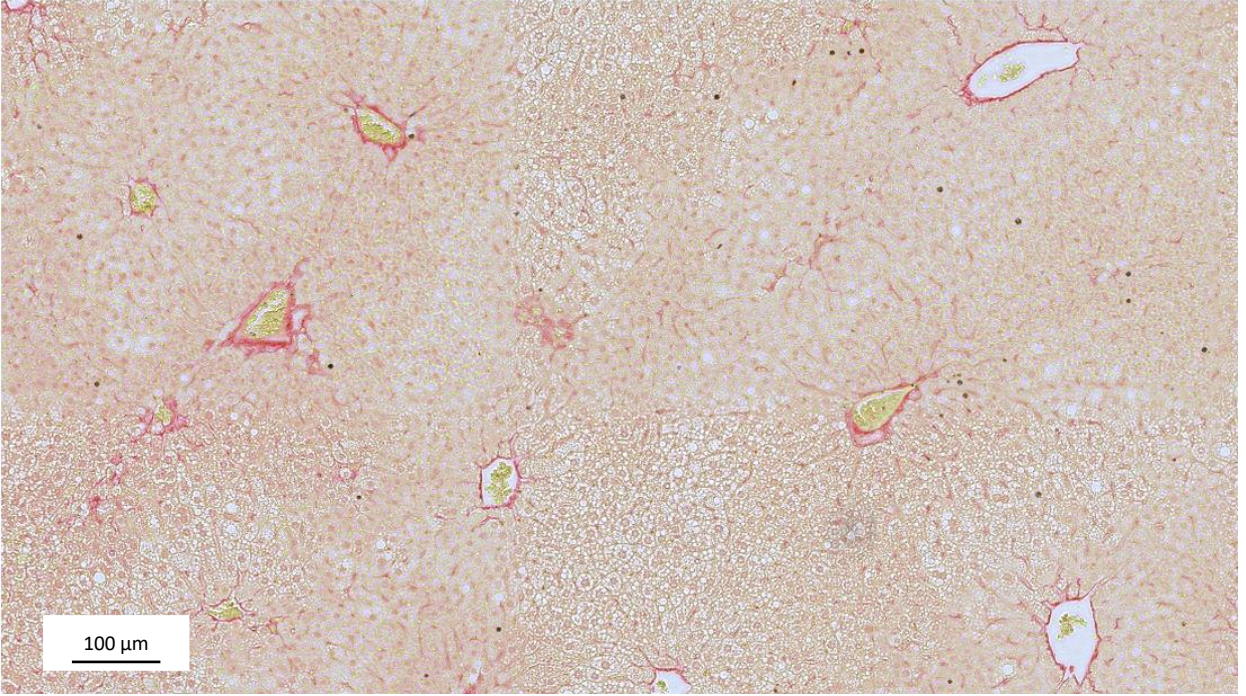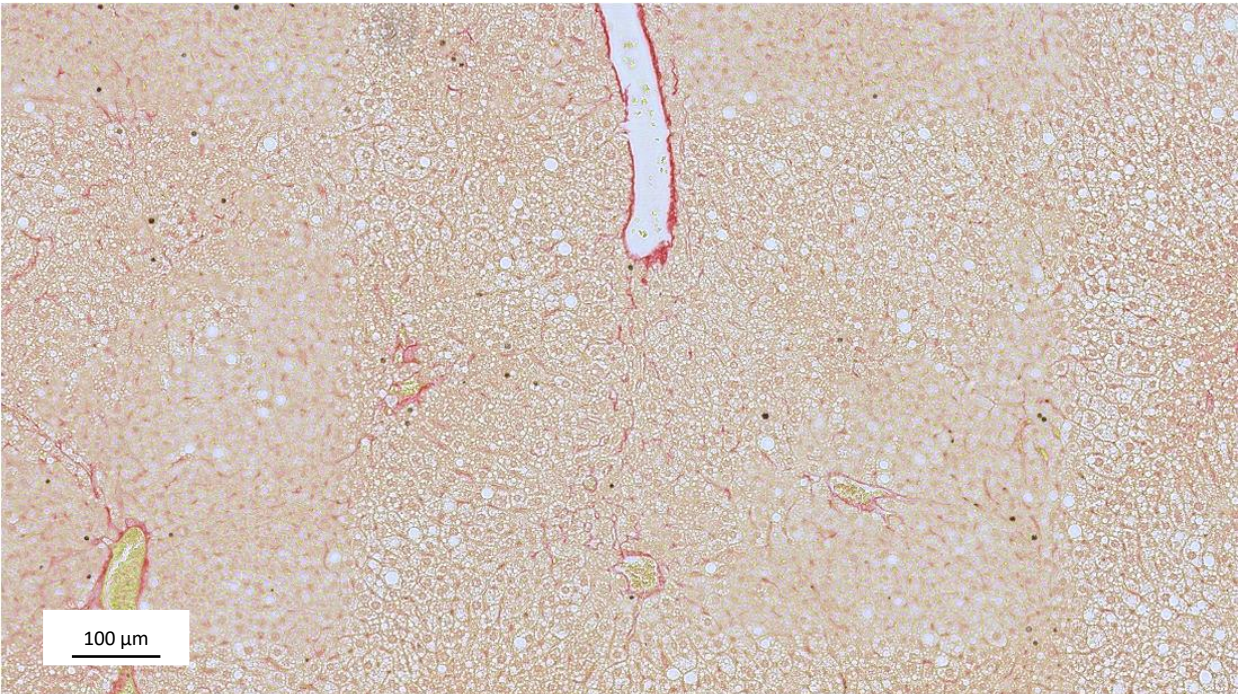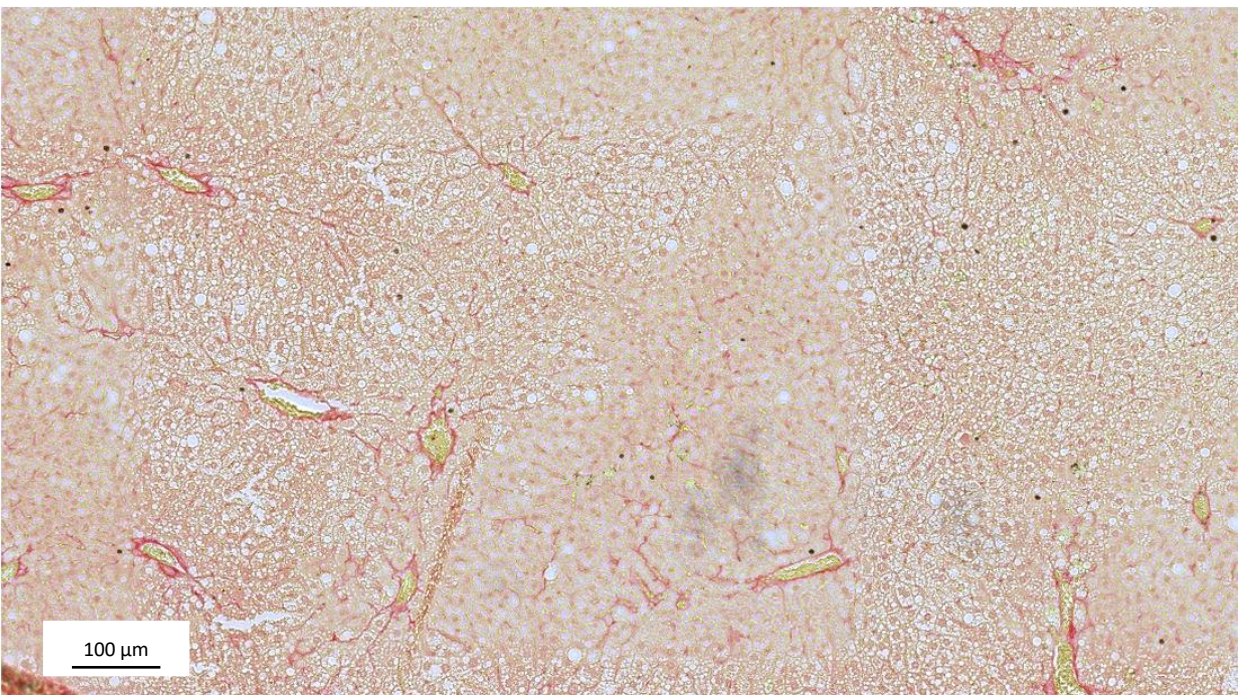

## **Sirius red Staining**

### **CDHFD-C group**

(15 mice were included)

# CDHFD-C-1

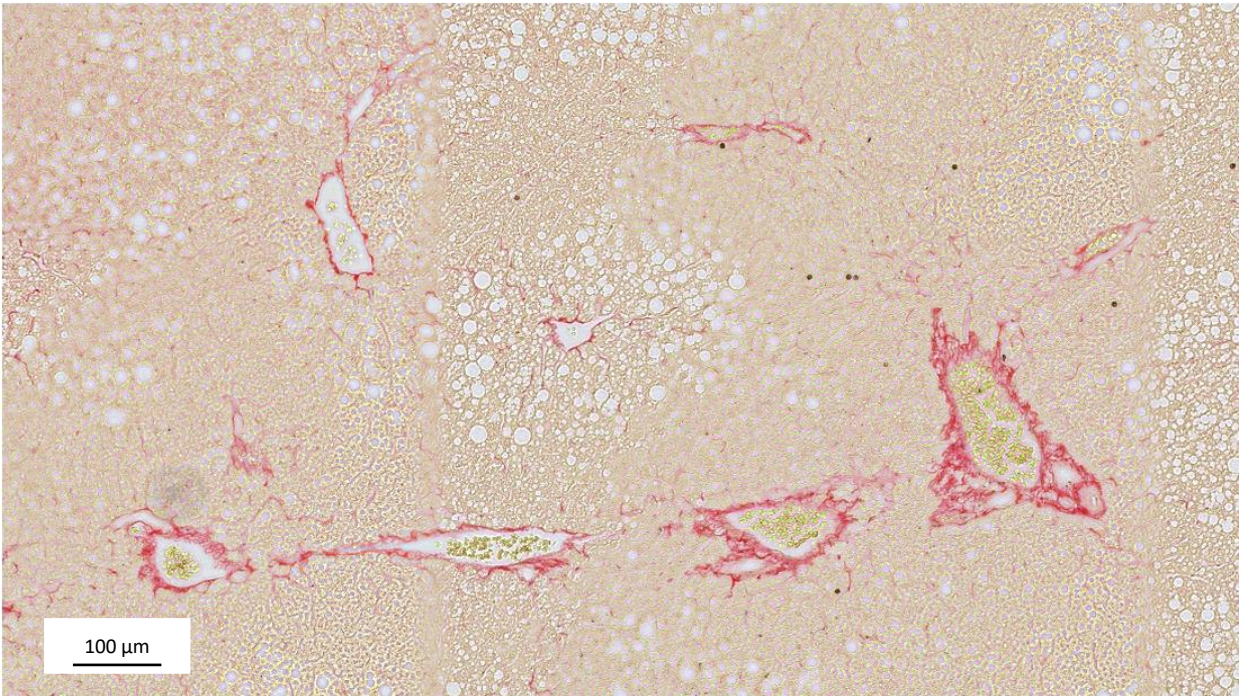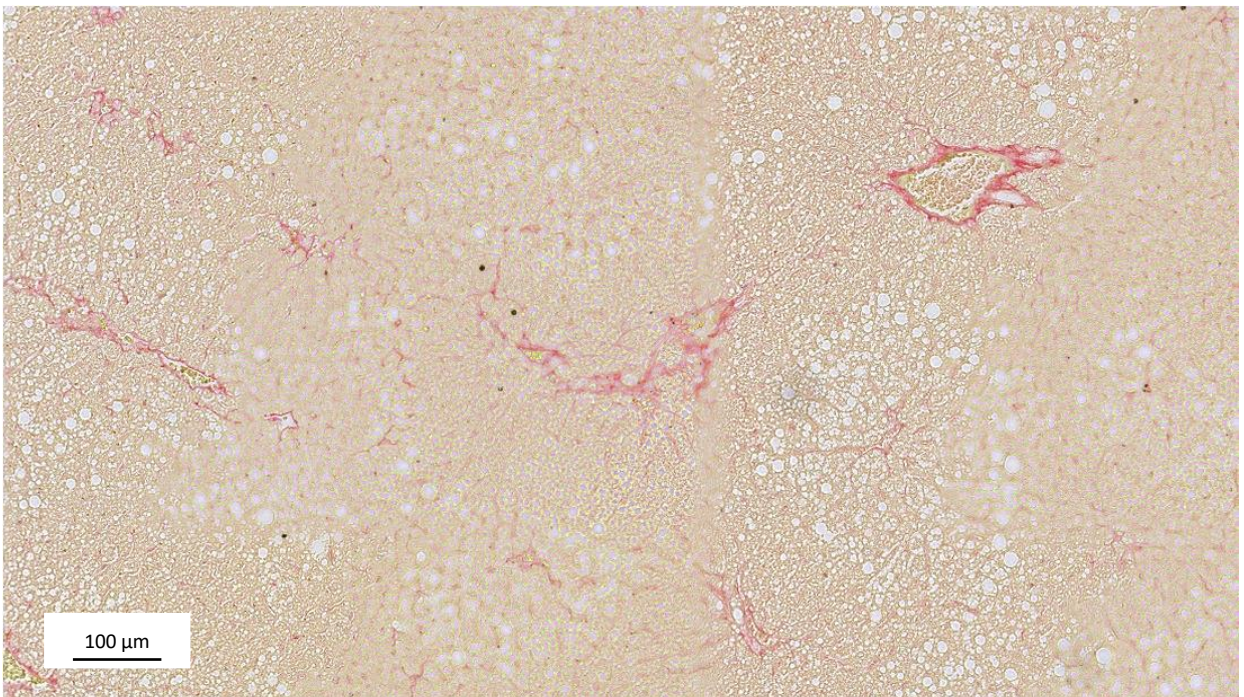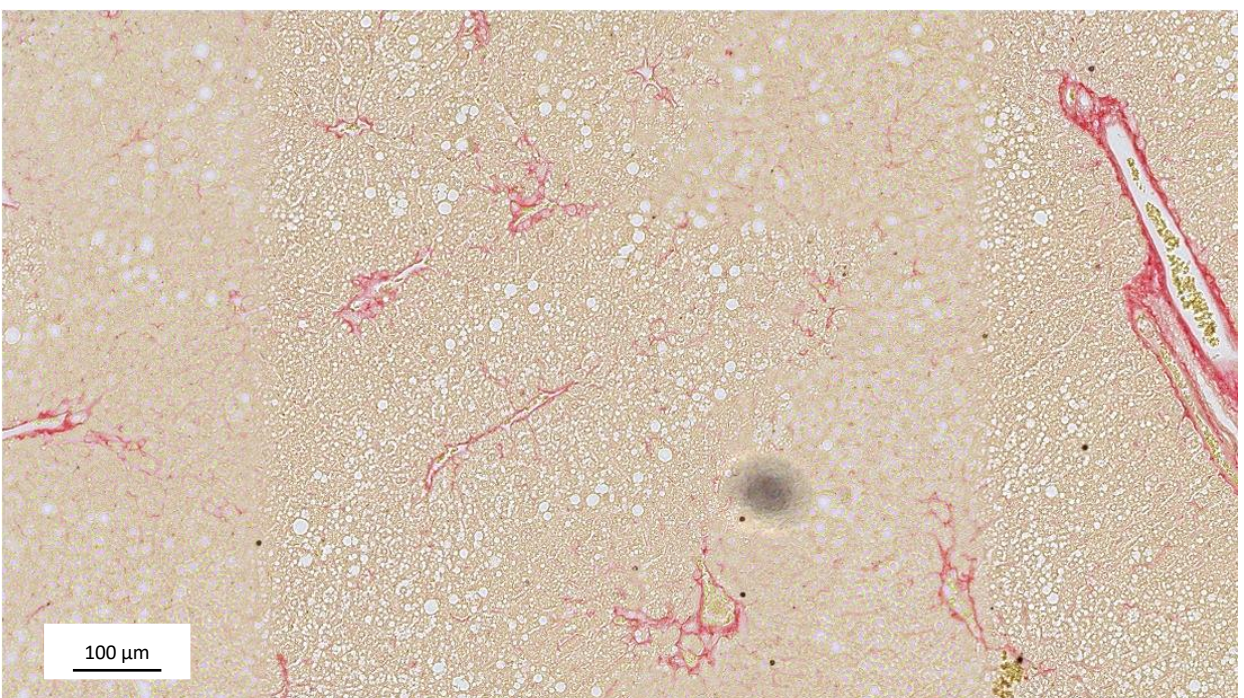

# CDHFD-C-2

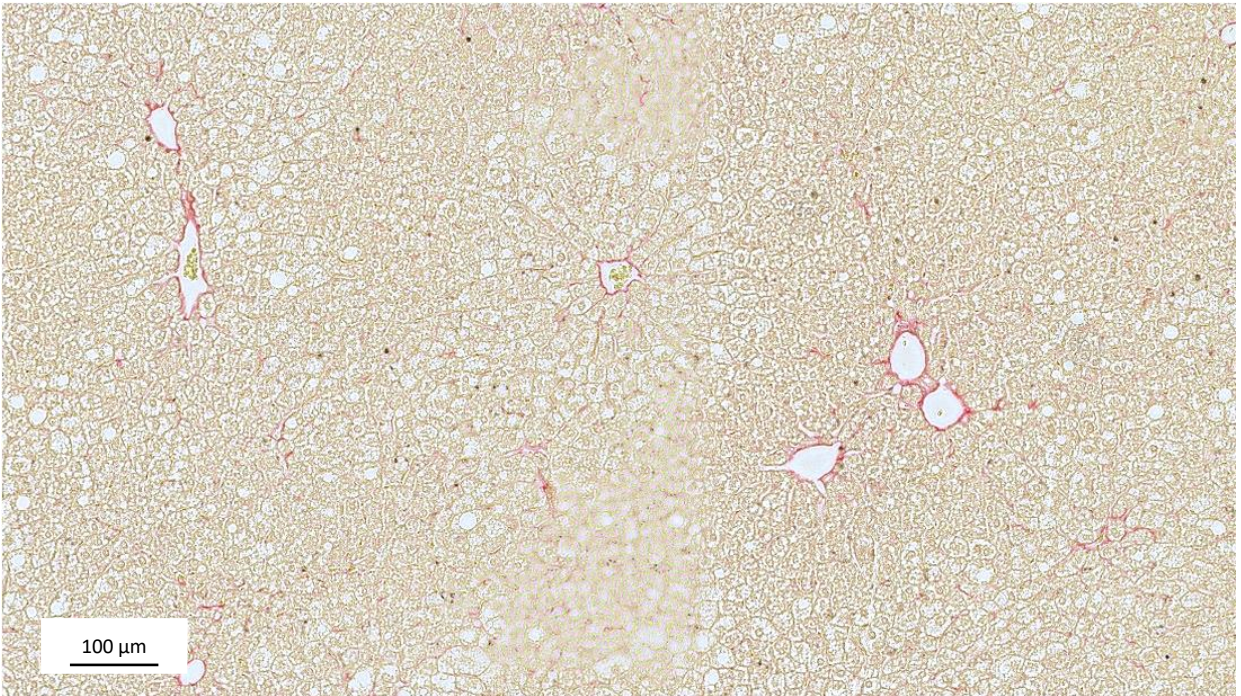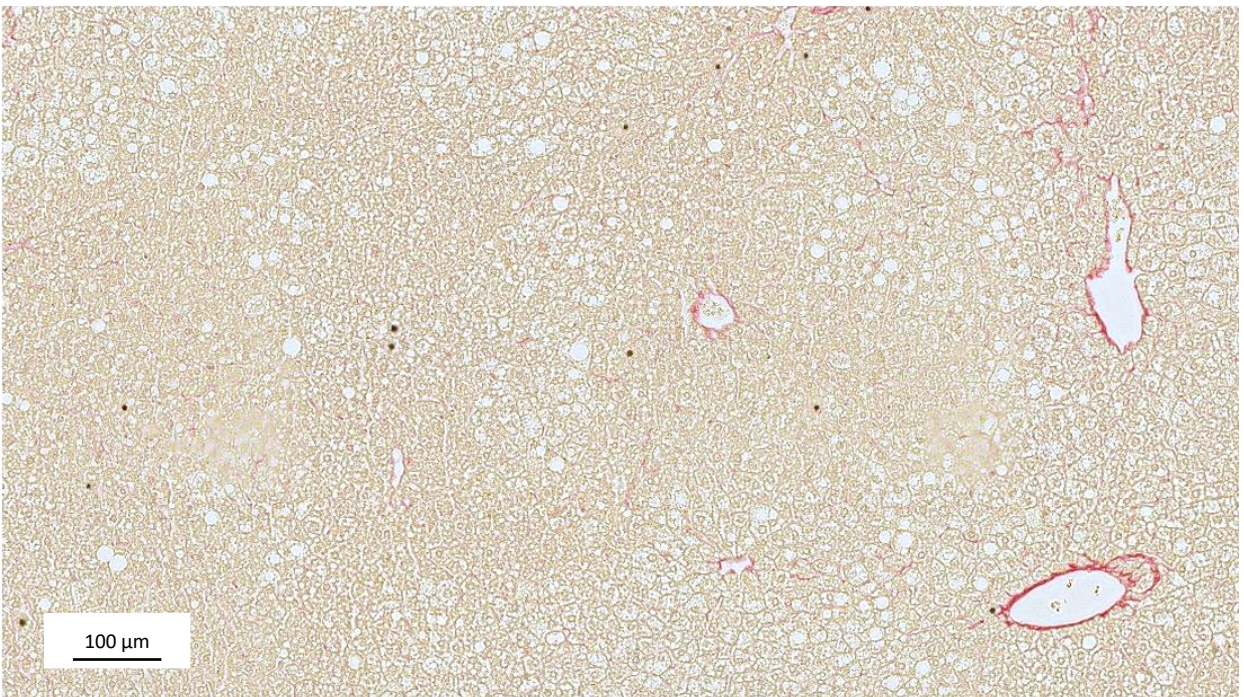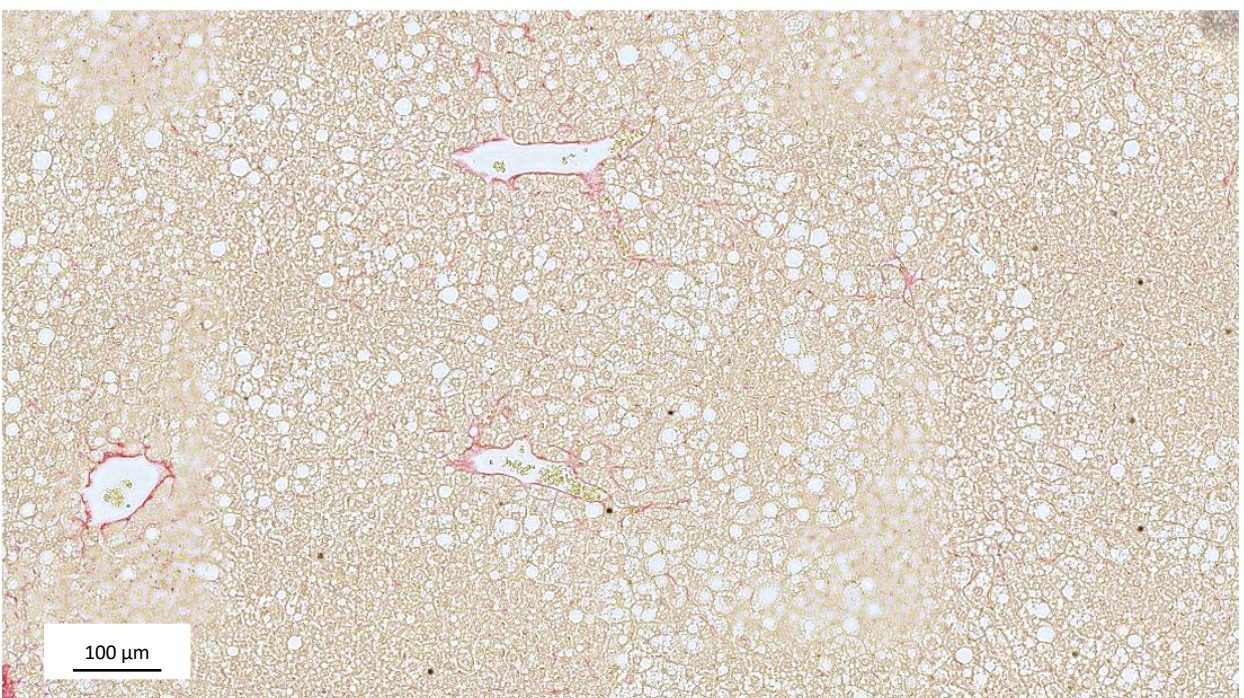

# CDHFD-C-3

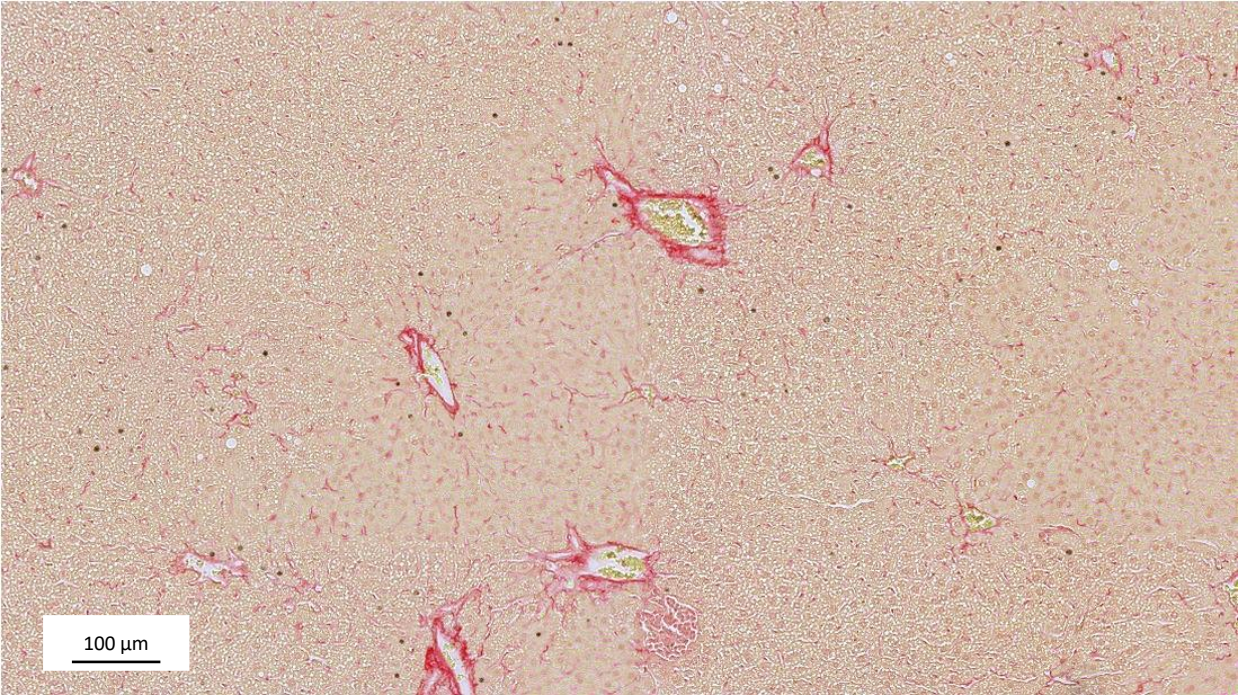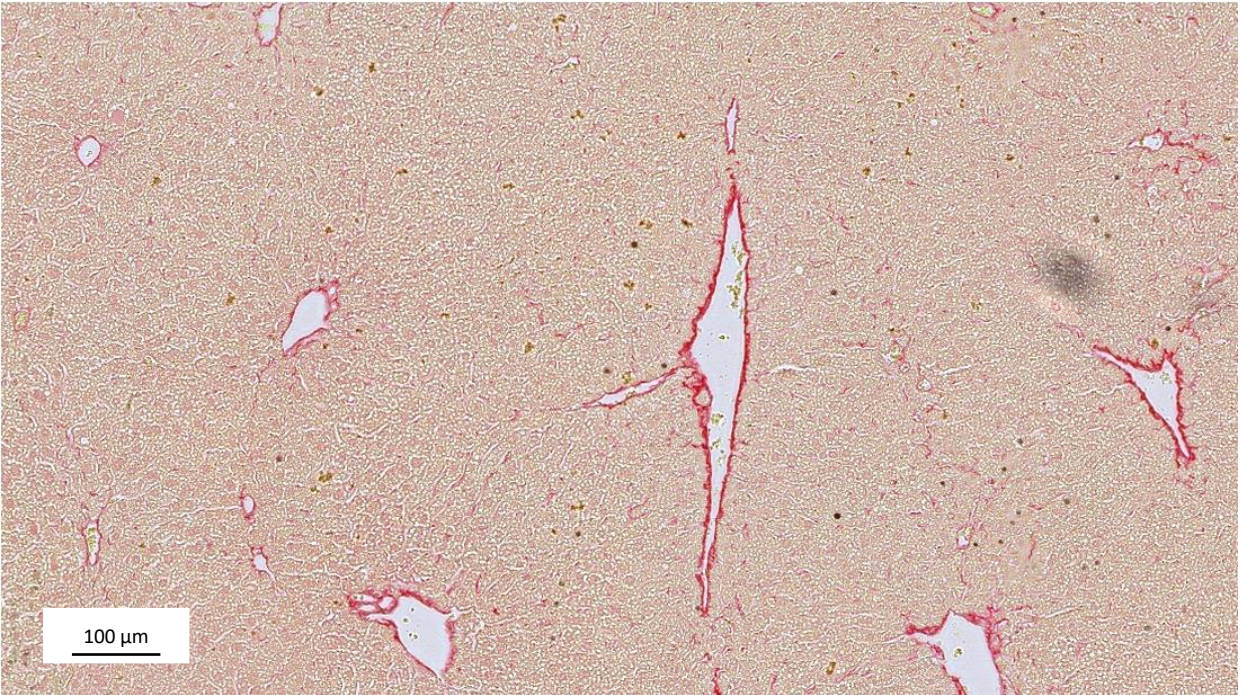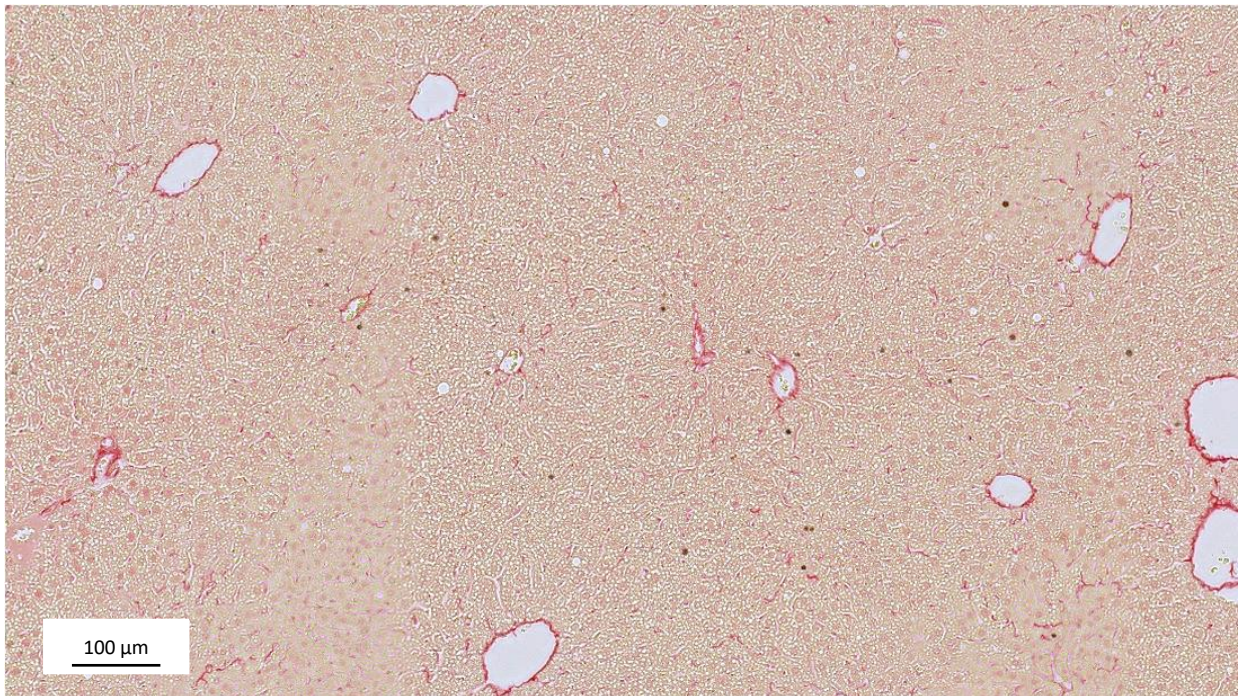

# CDHFD-C-4

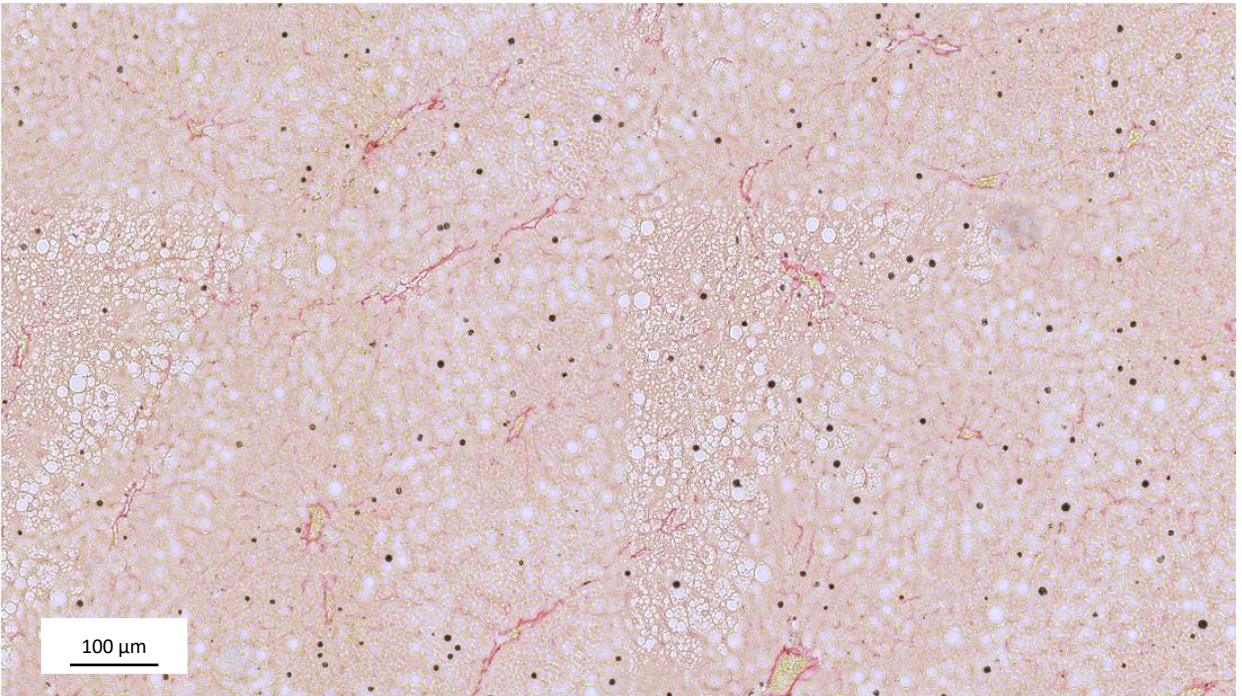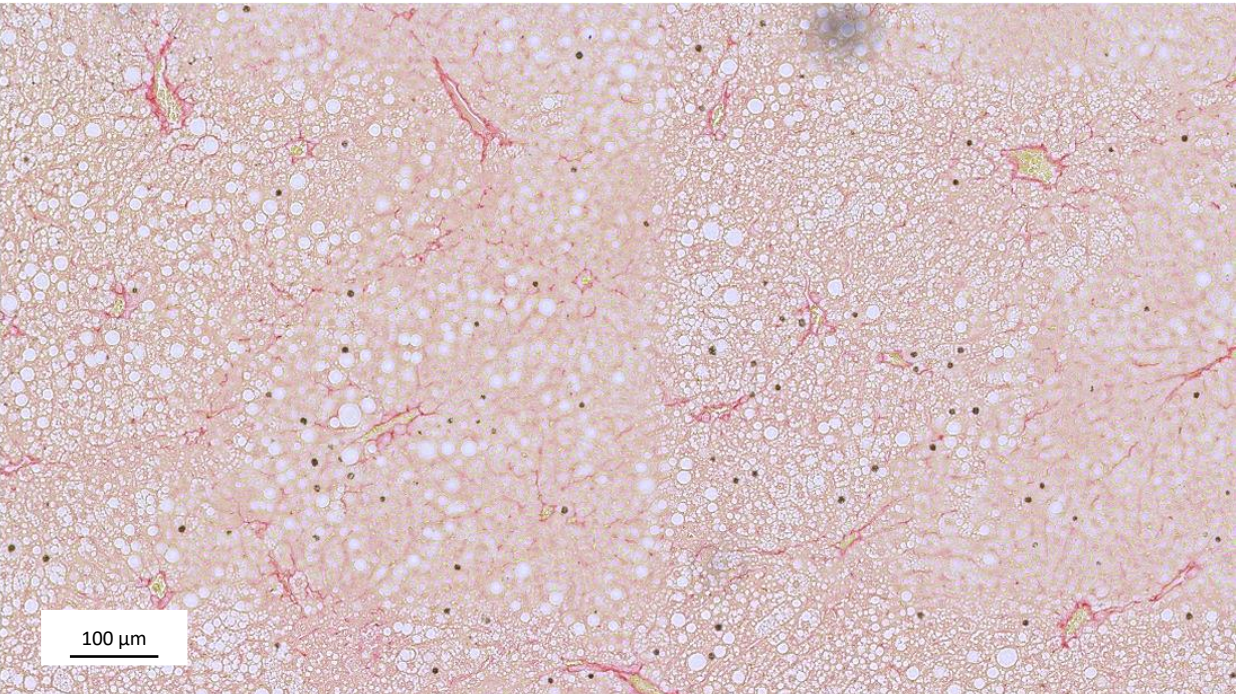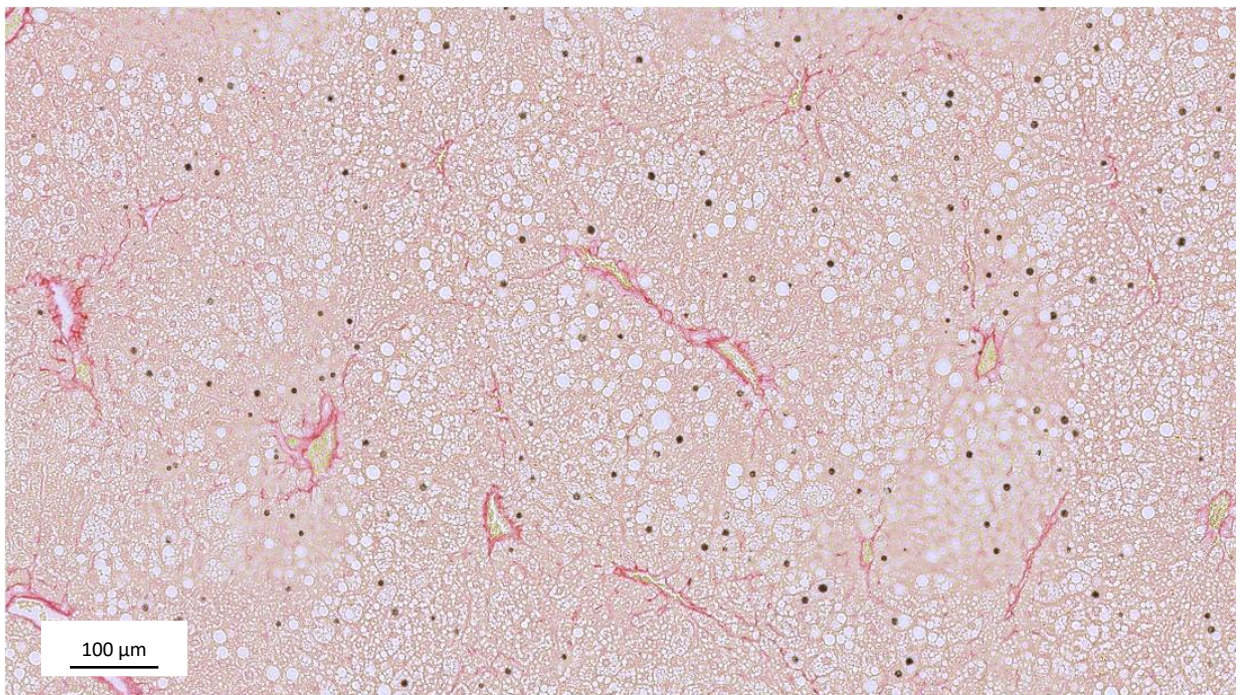



# CDHFD-C-5

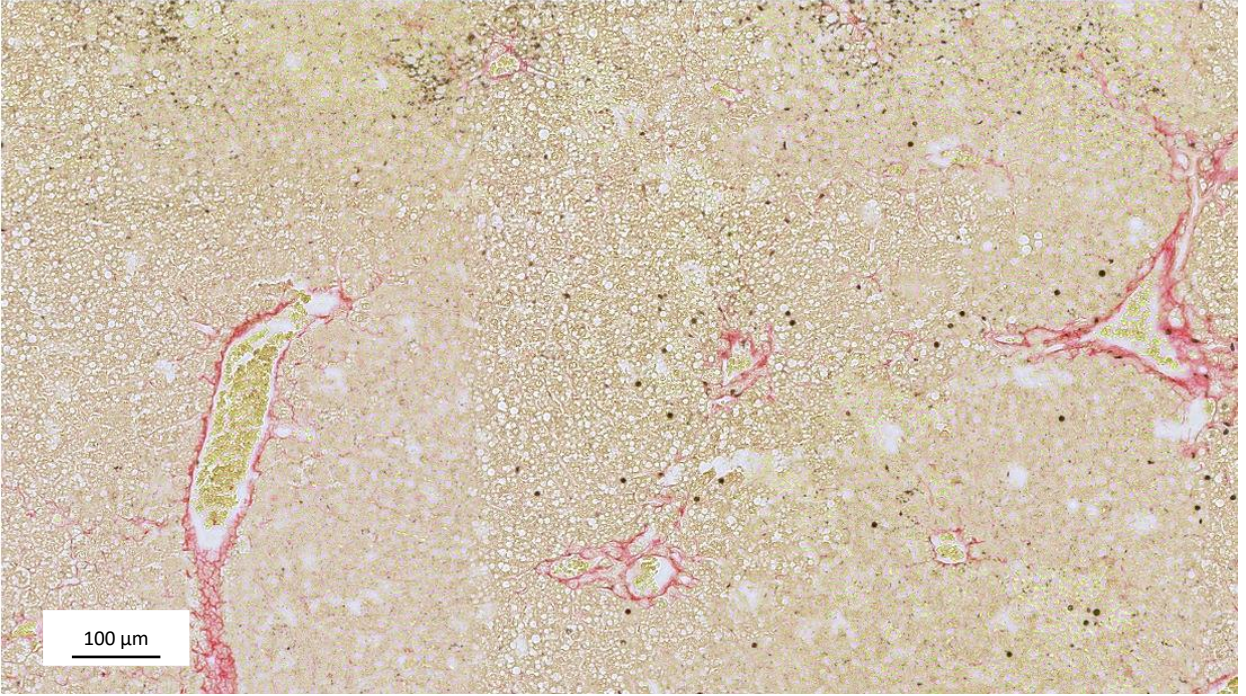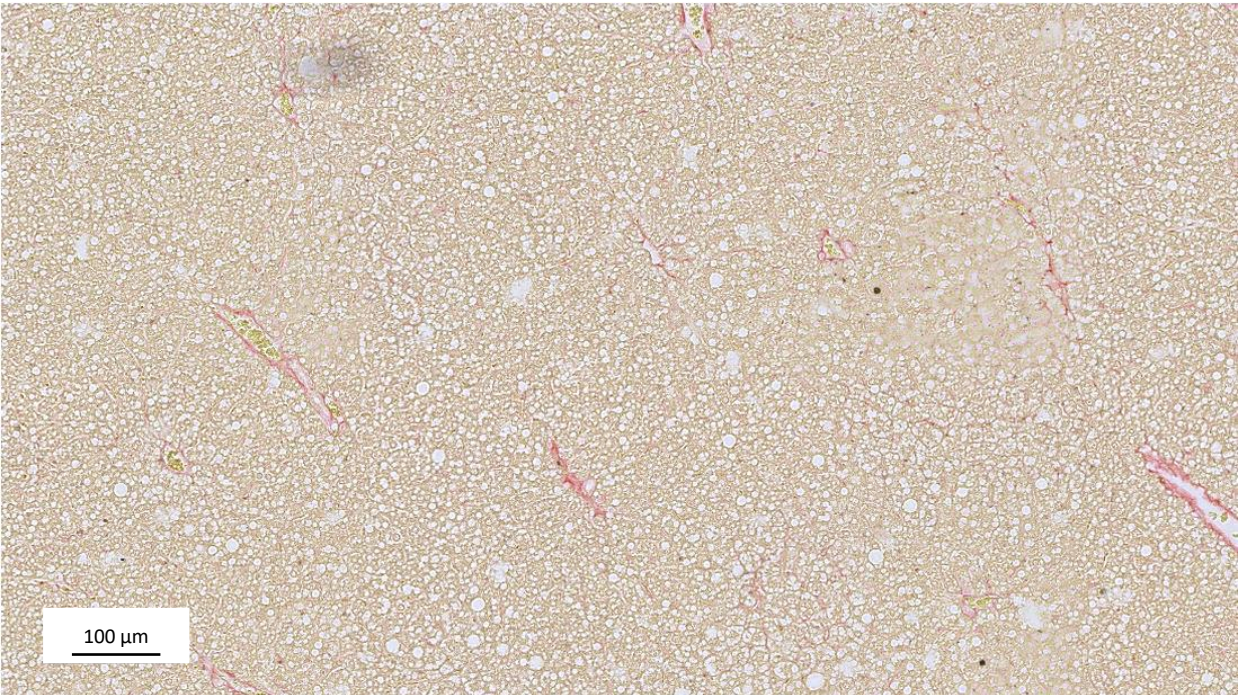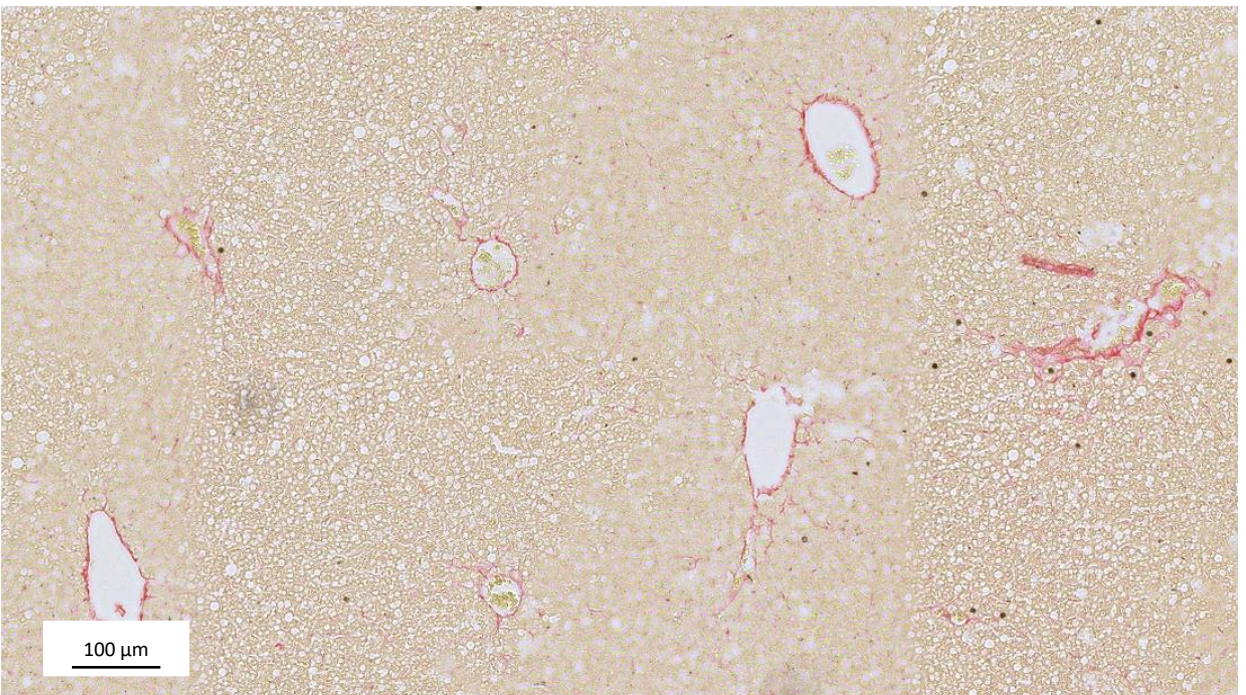

# CDHFD-C-6

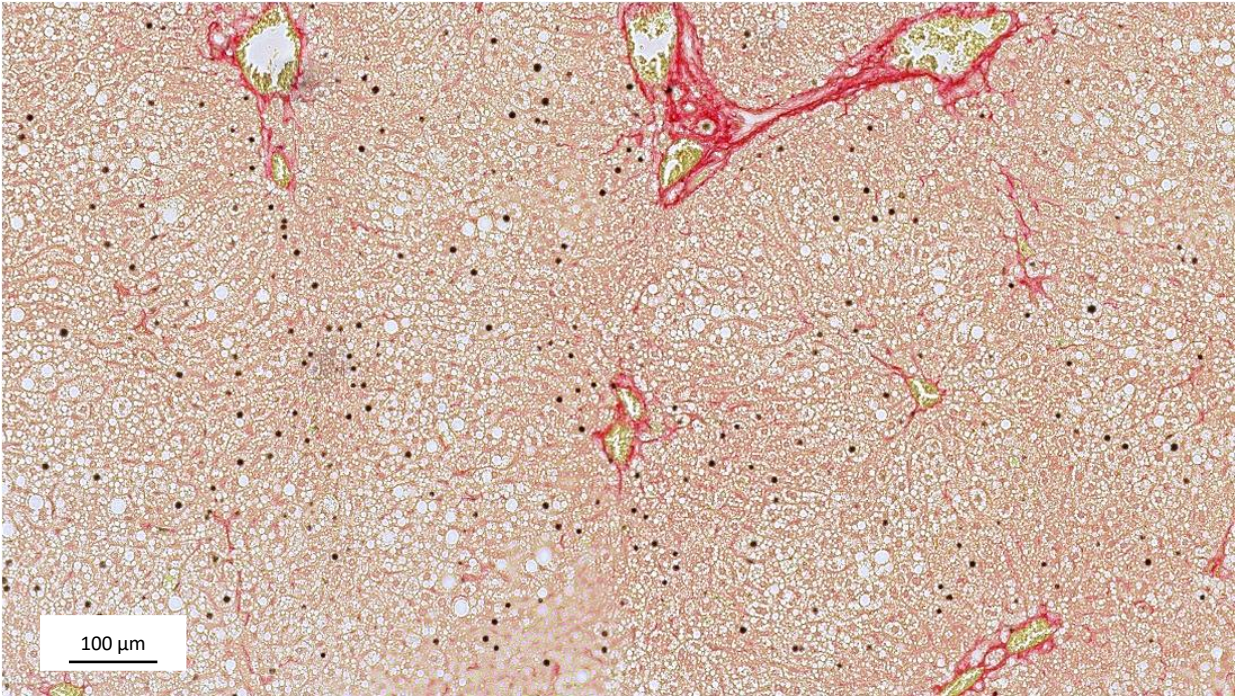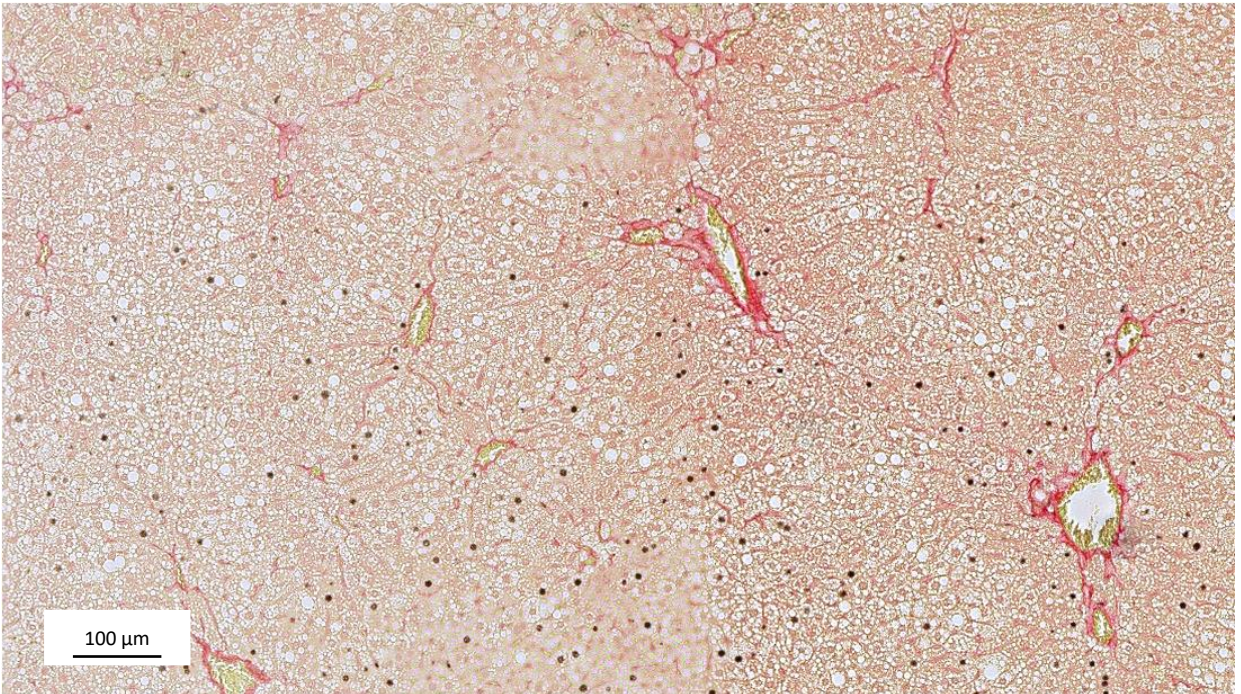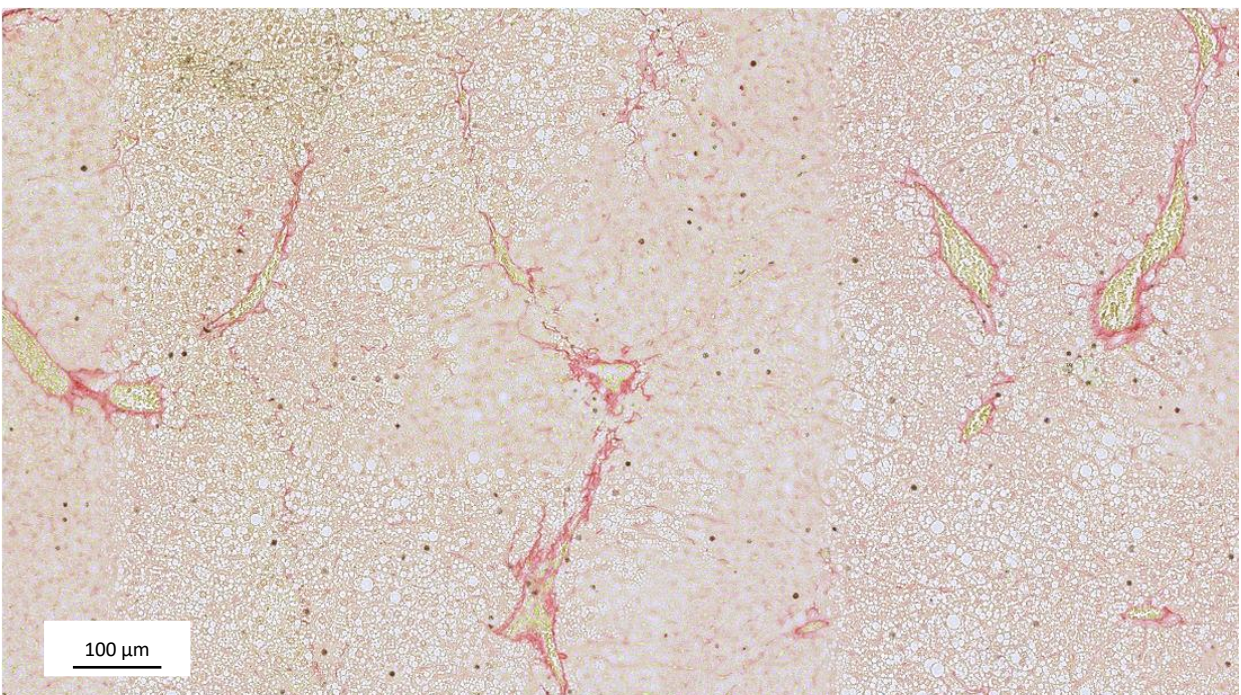

# CDHFD-C-7

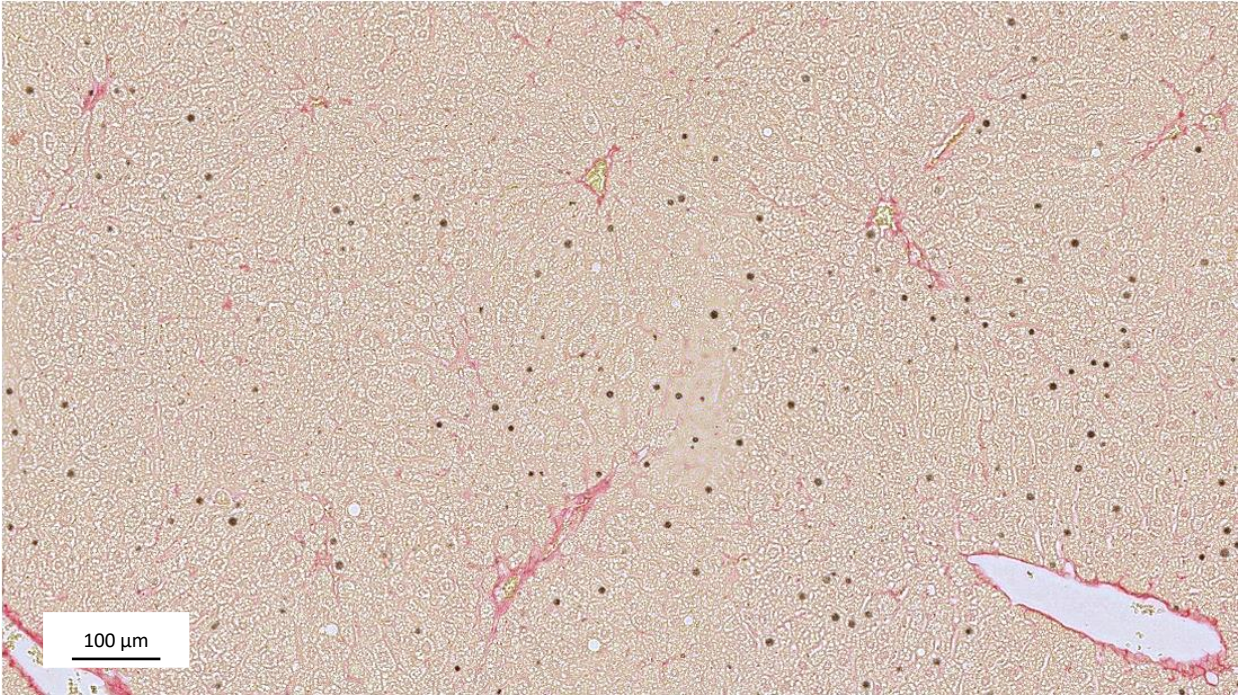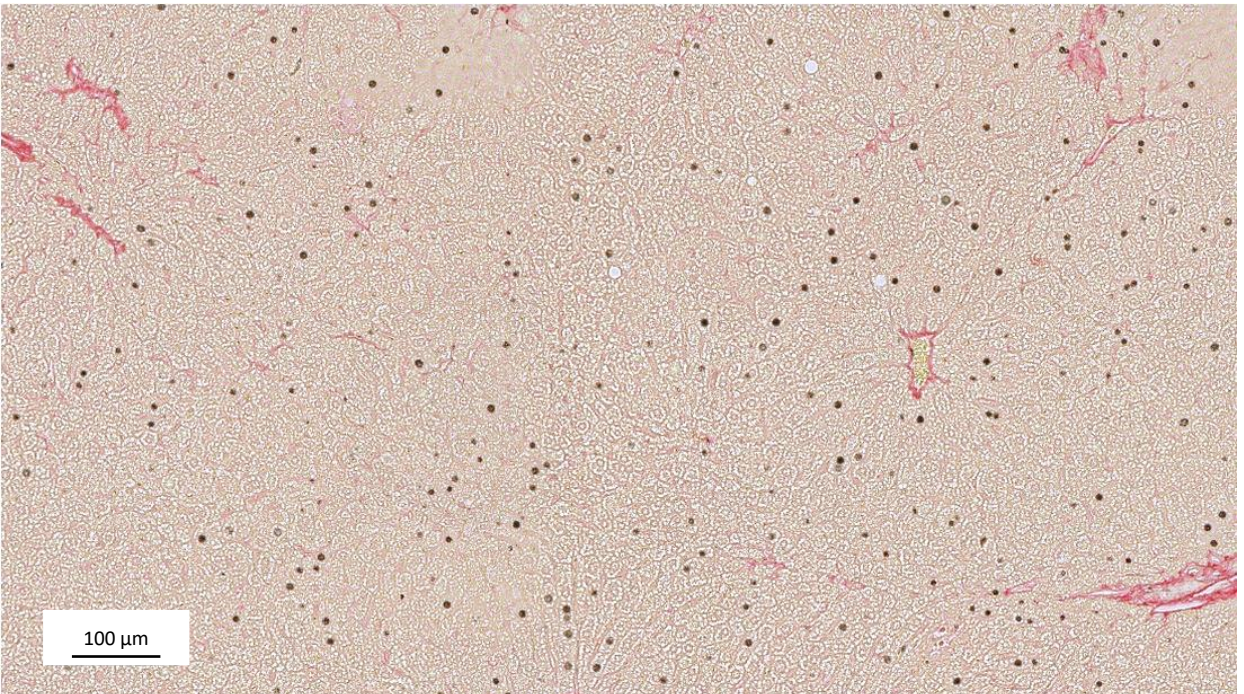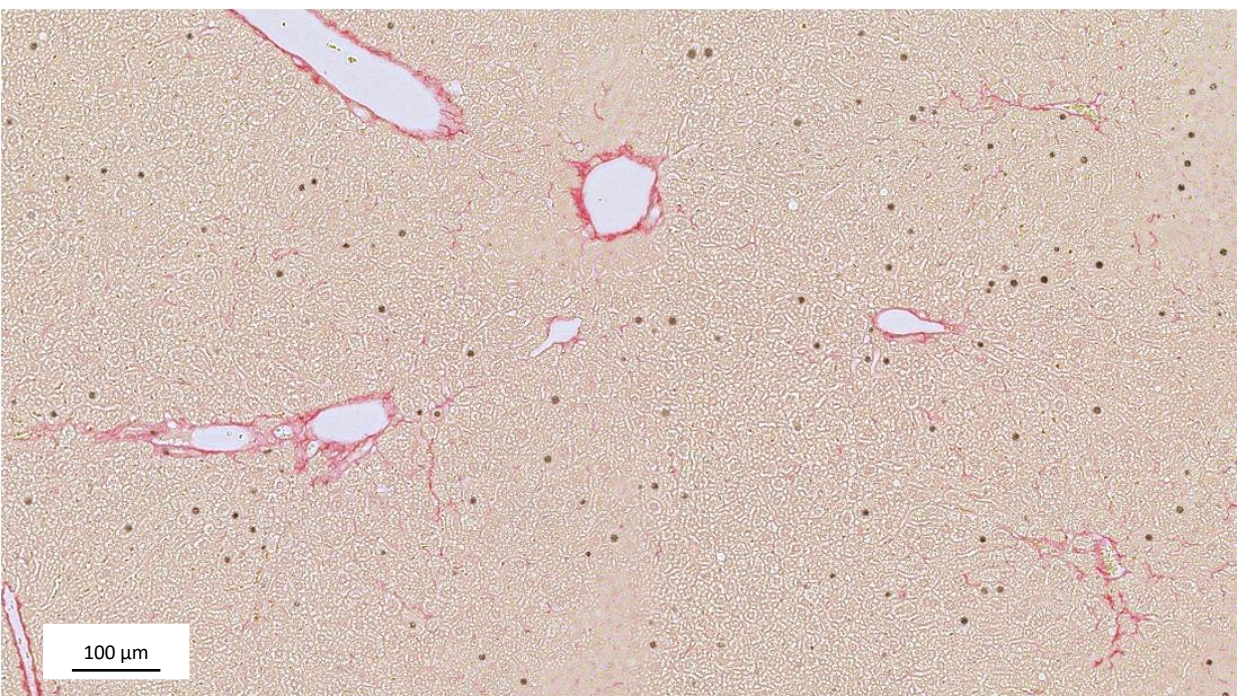

# CDHFD-C-8

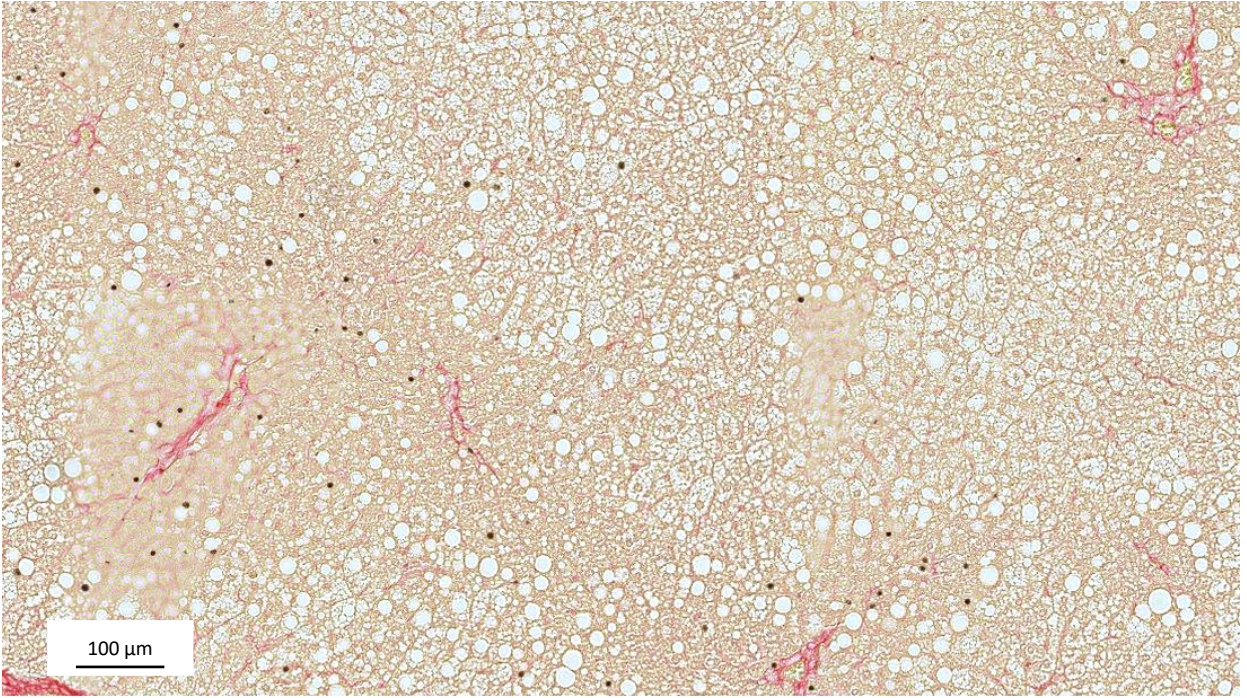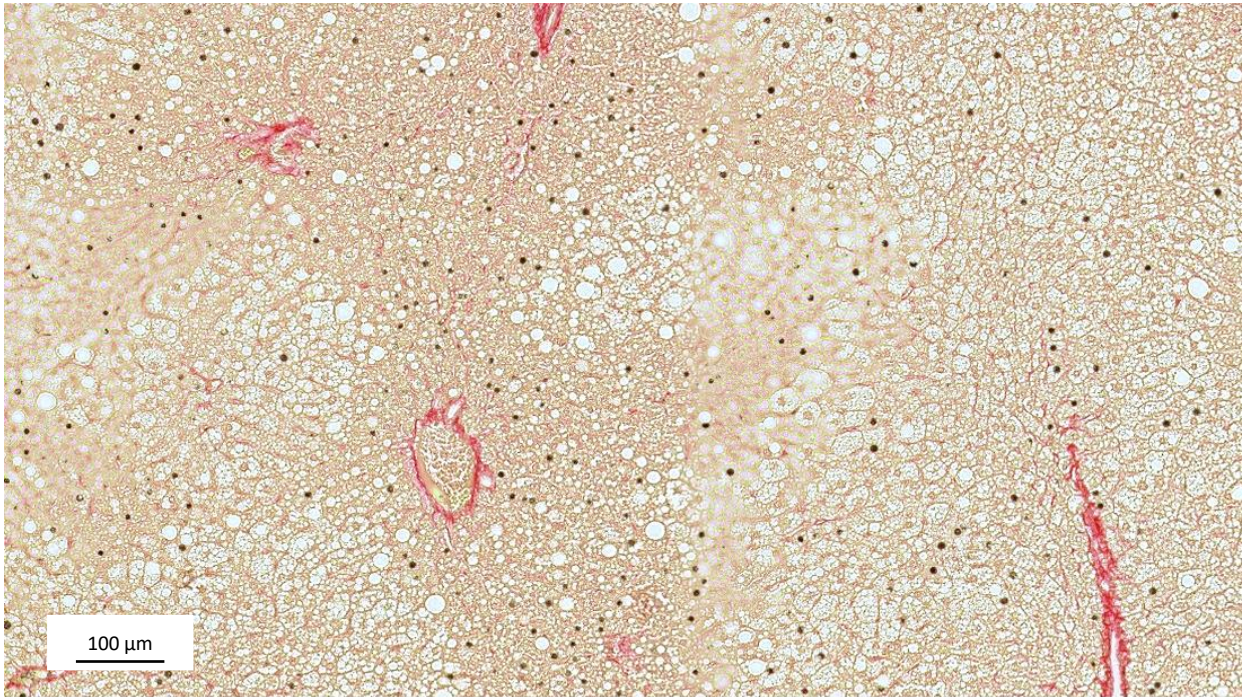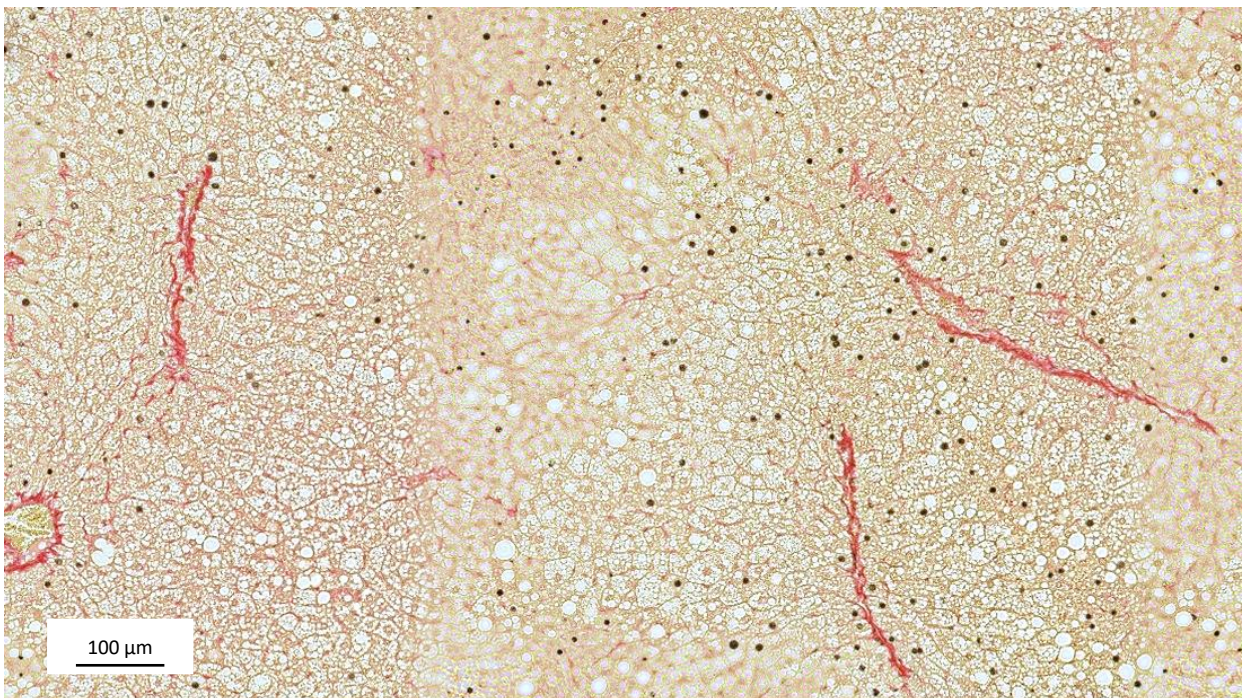

# CDHFD-C-9

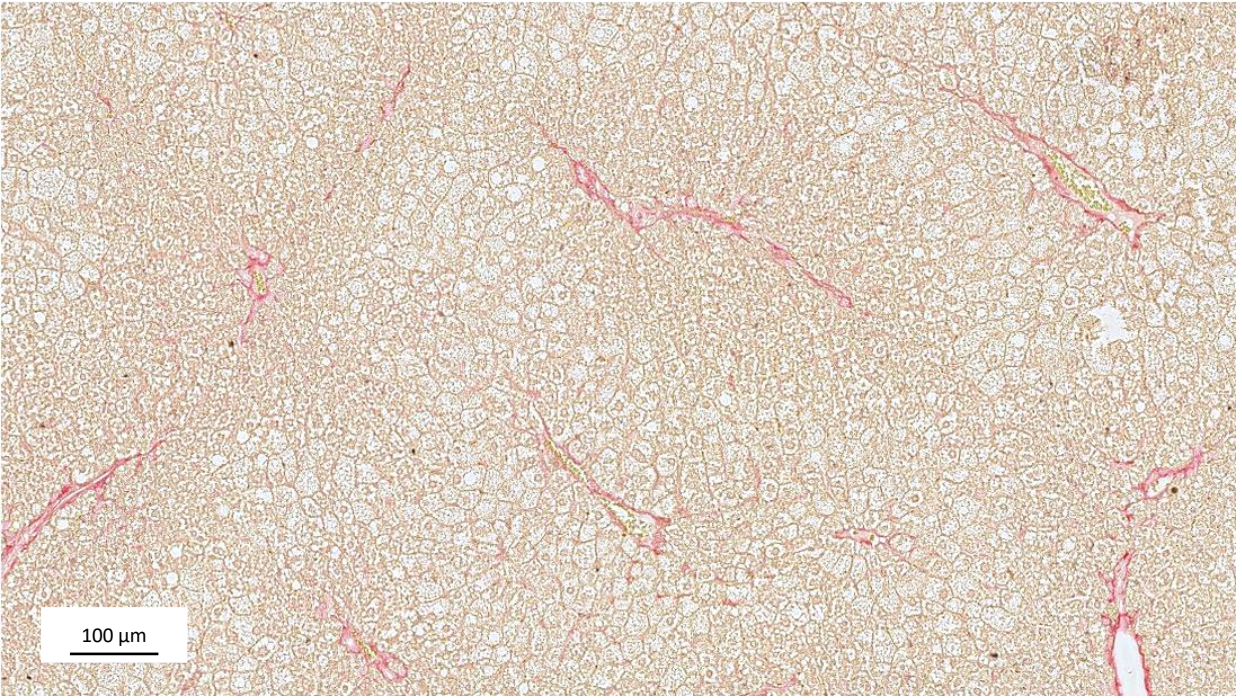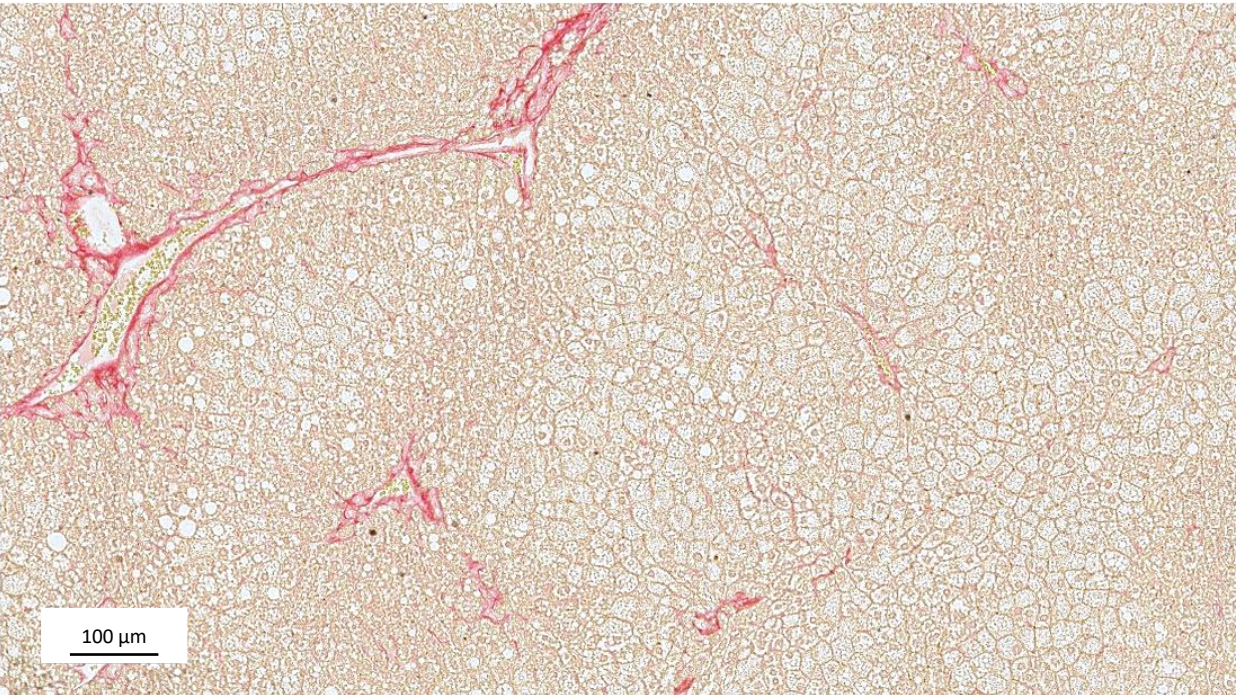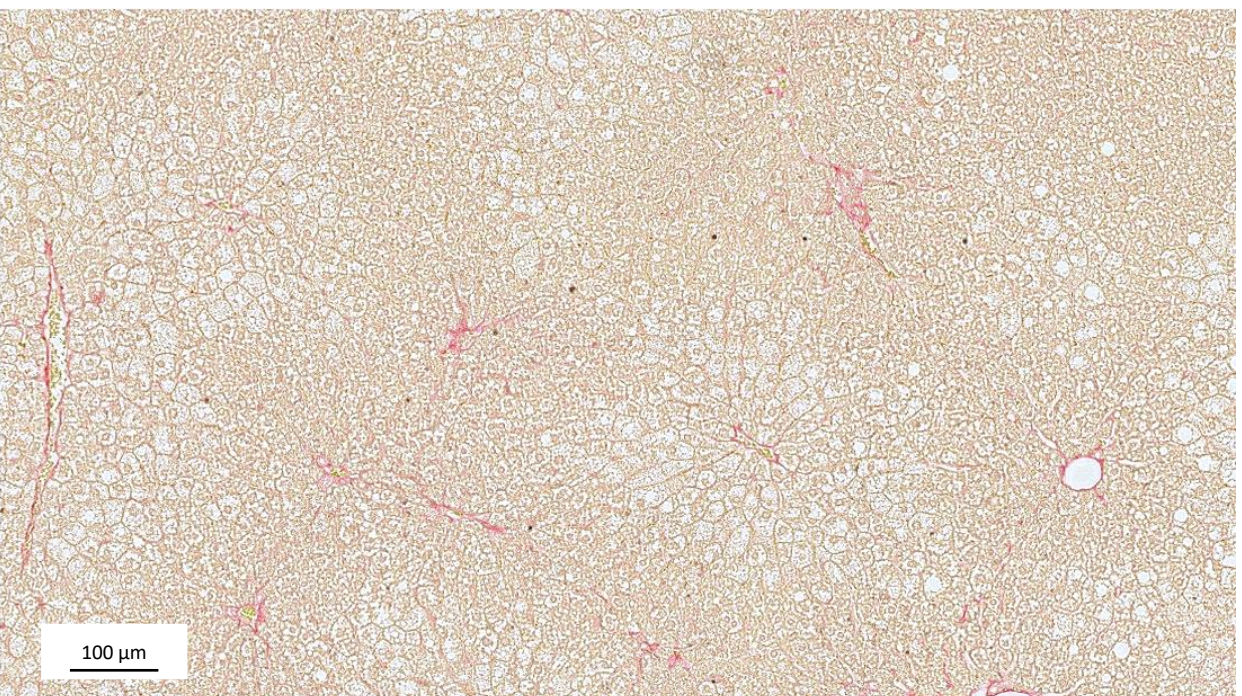

# CDHFD-C-10

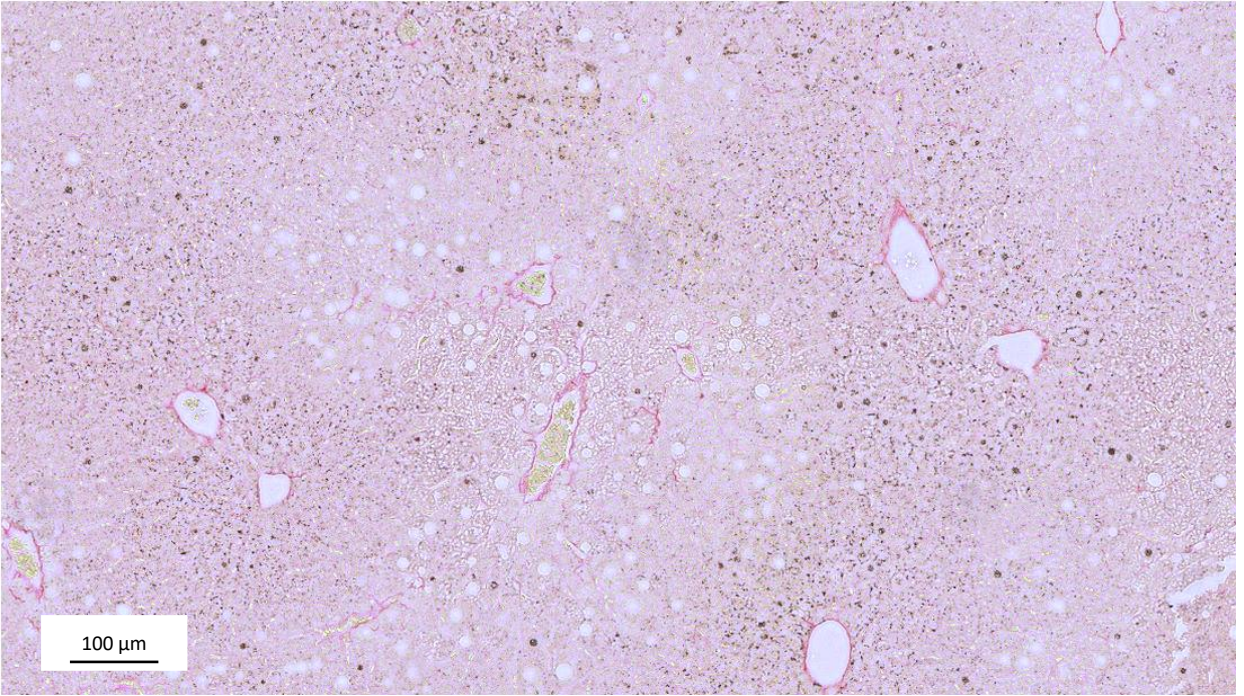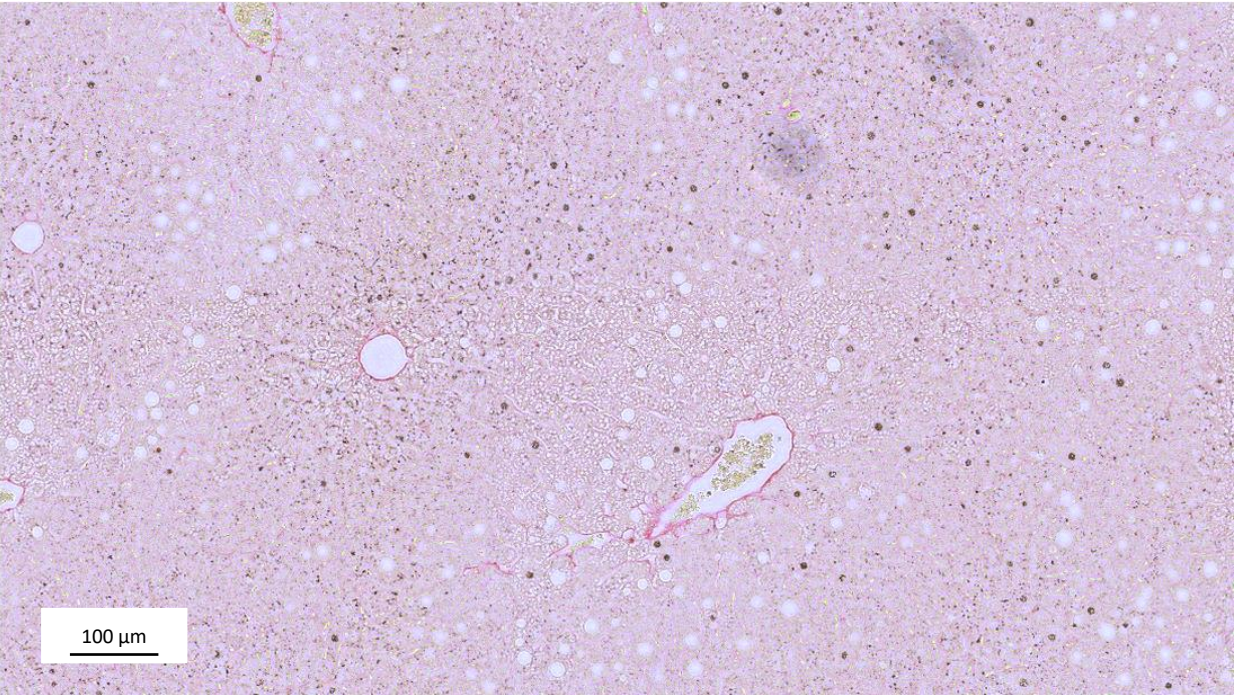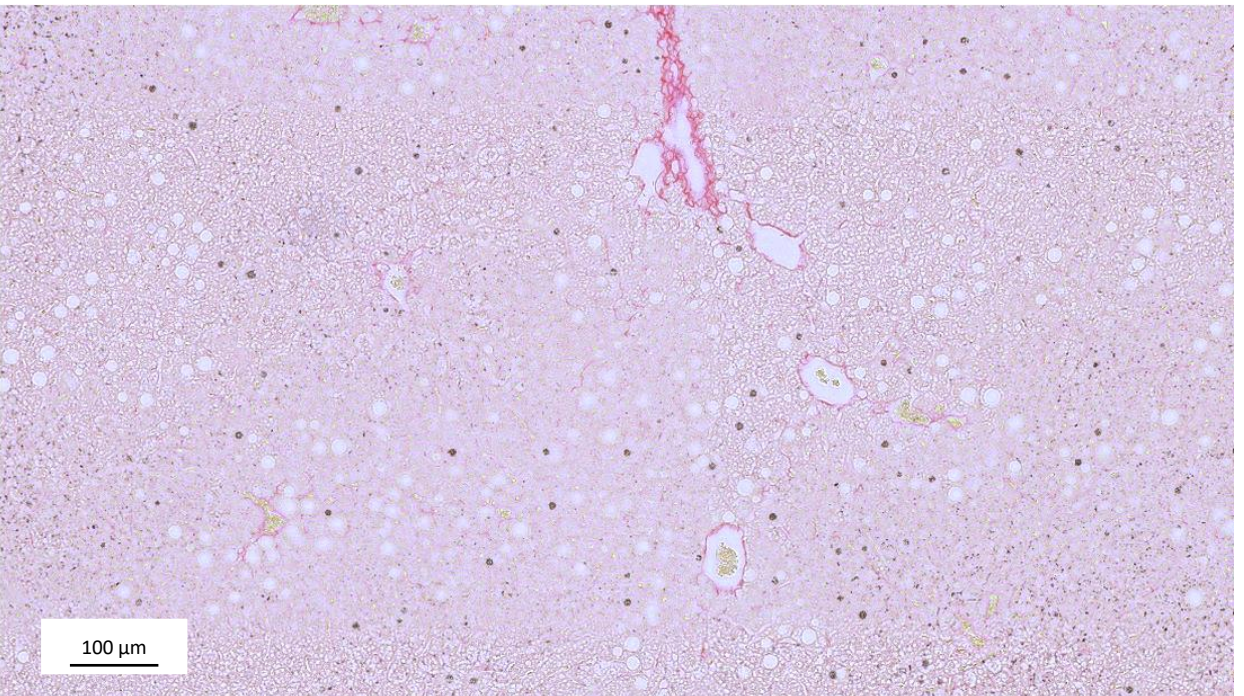

# CDHFD-C-11

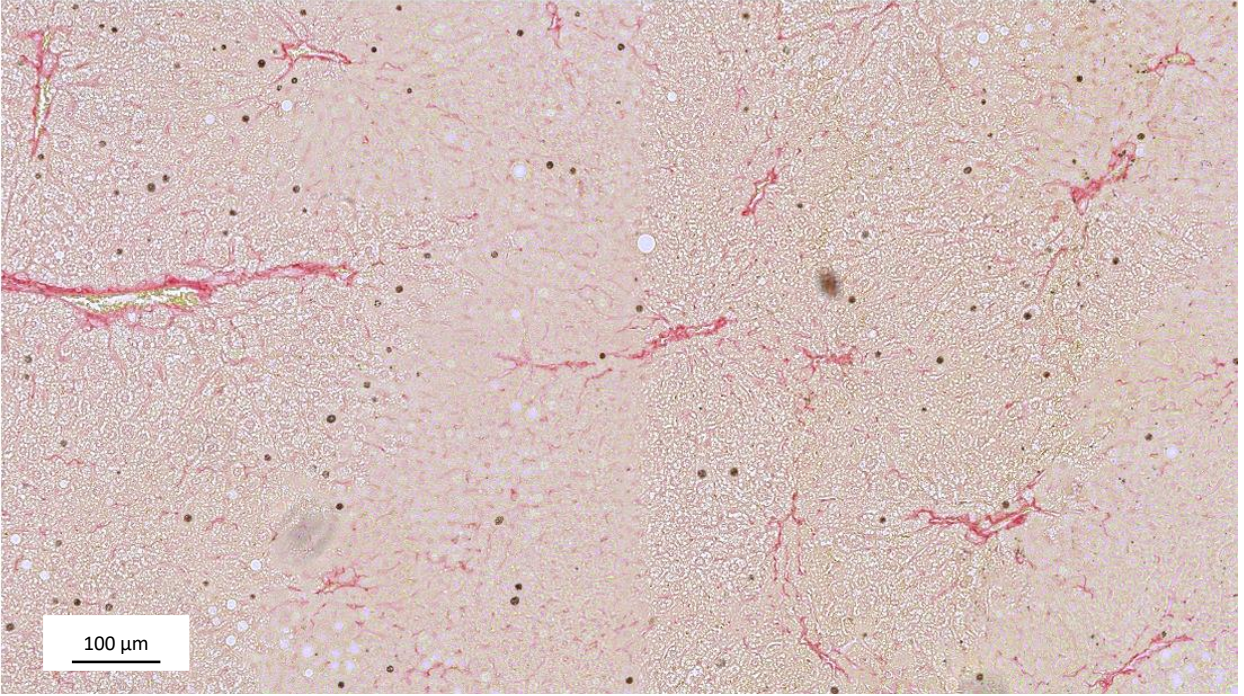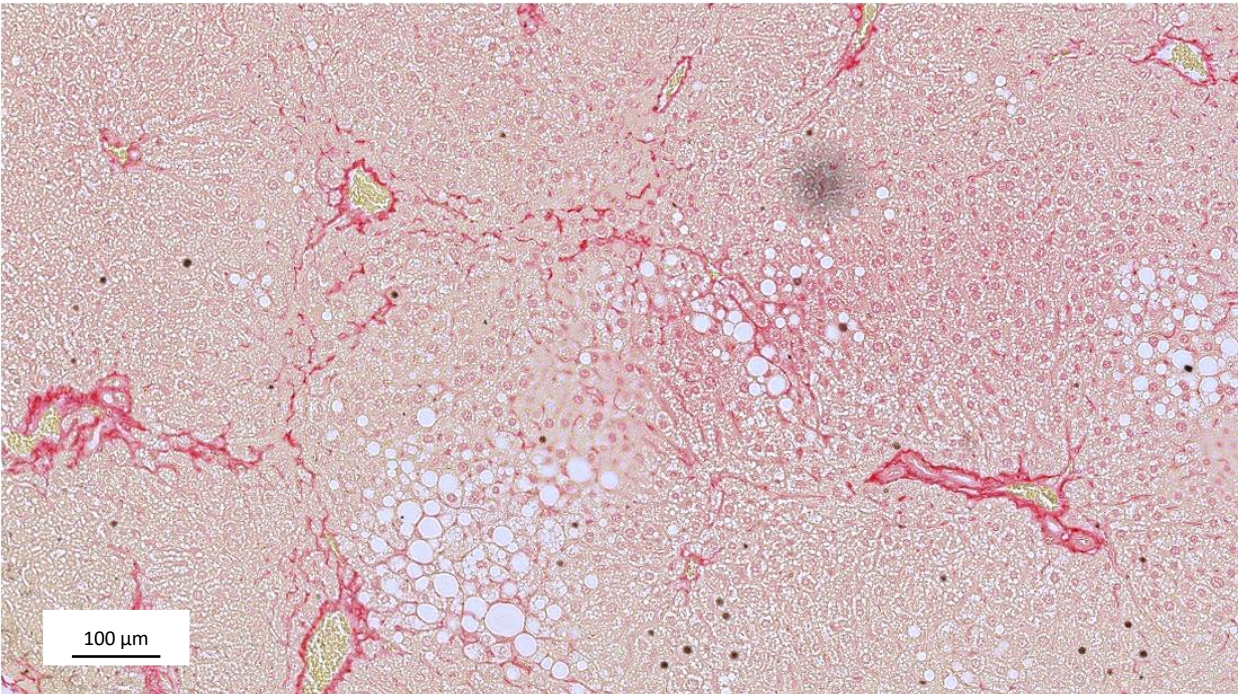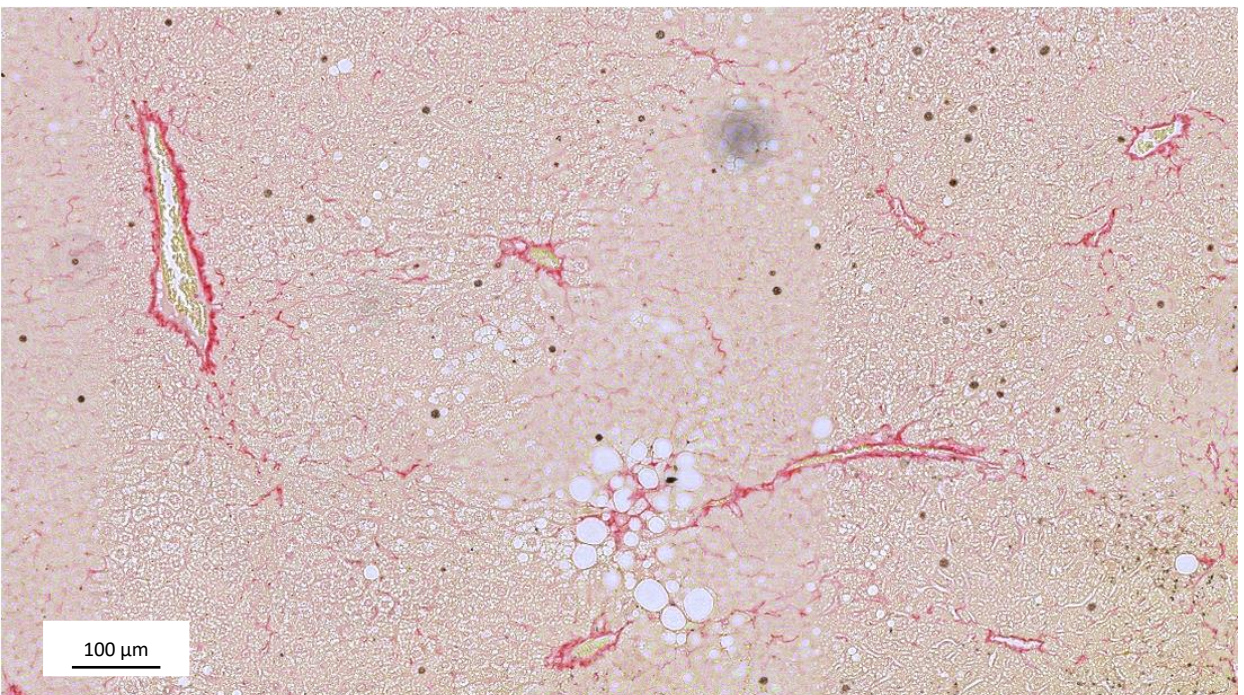

CDHFD-C-12

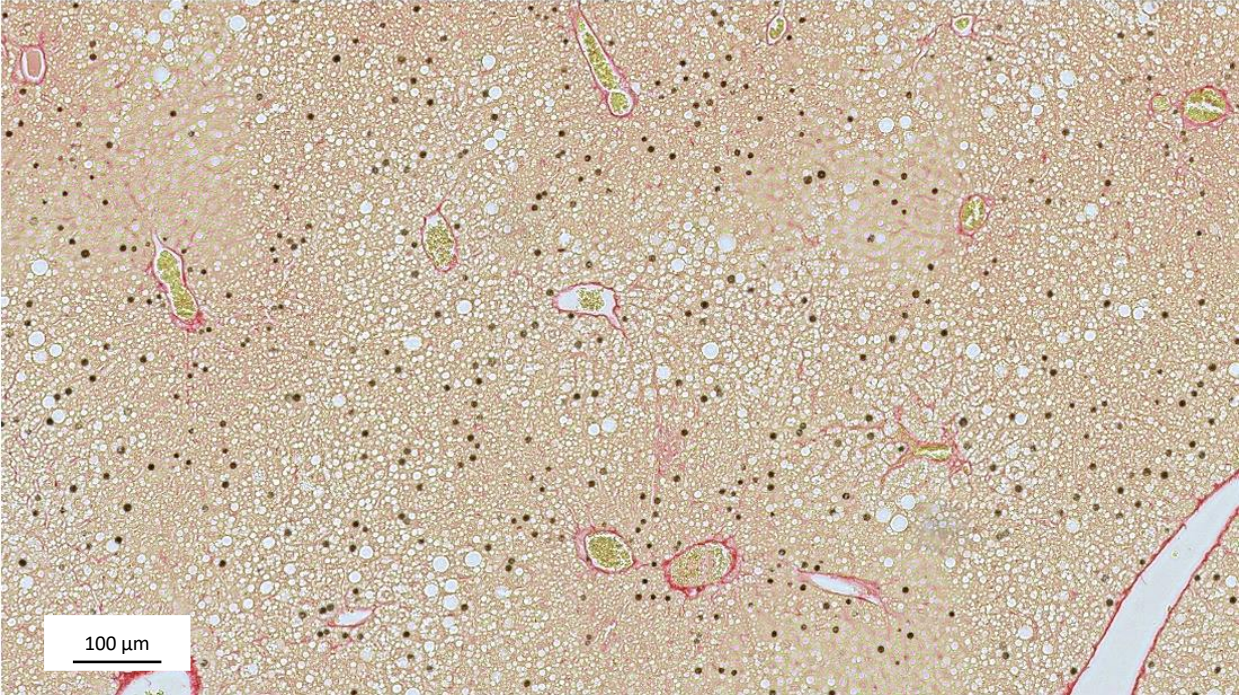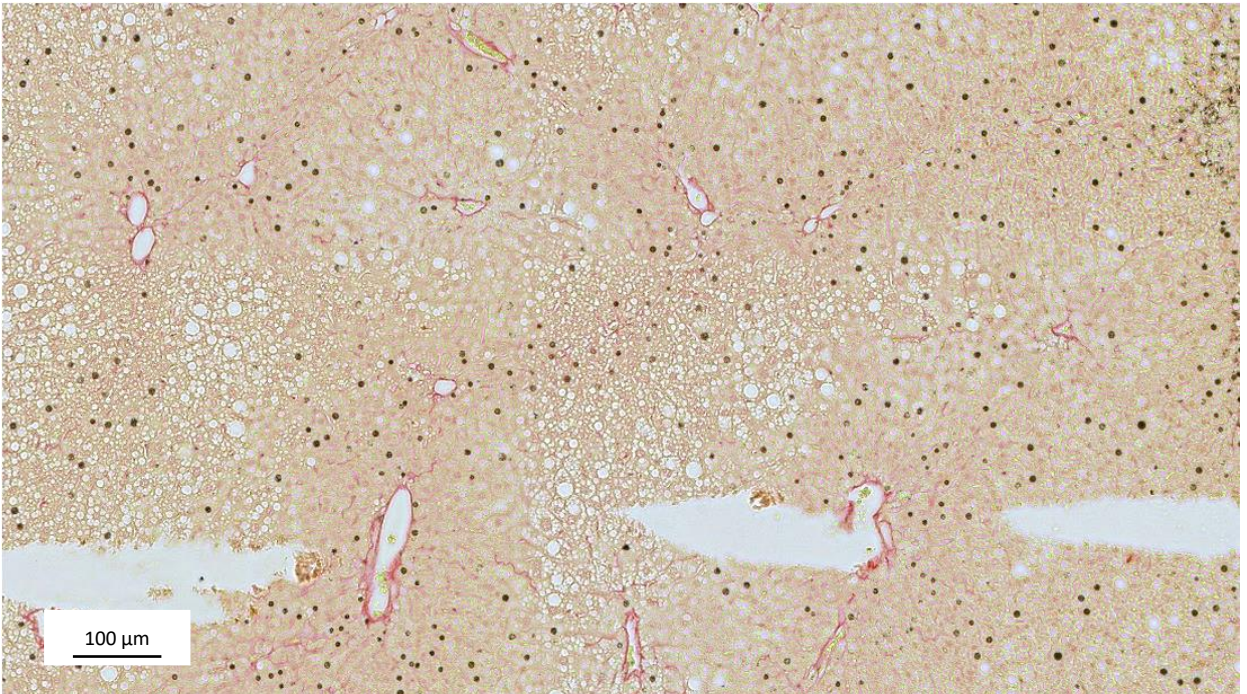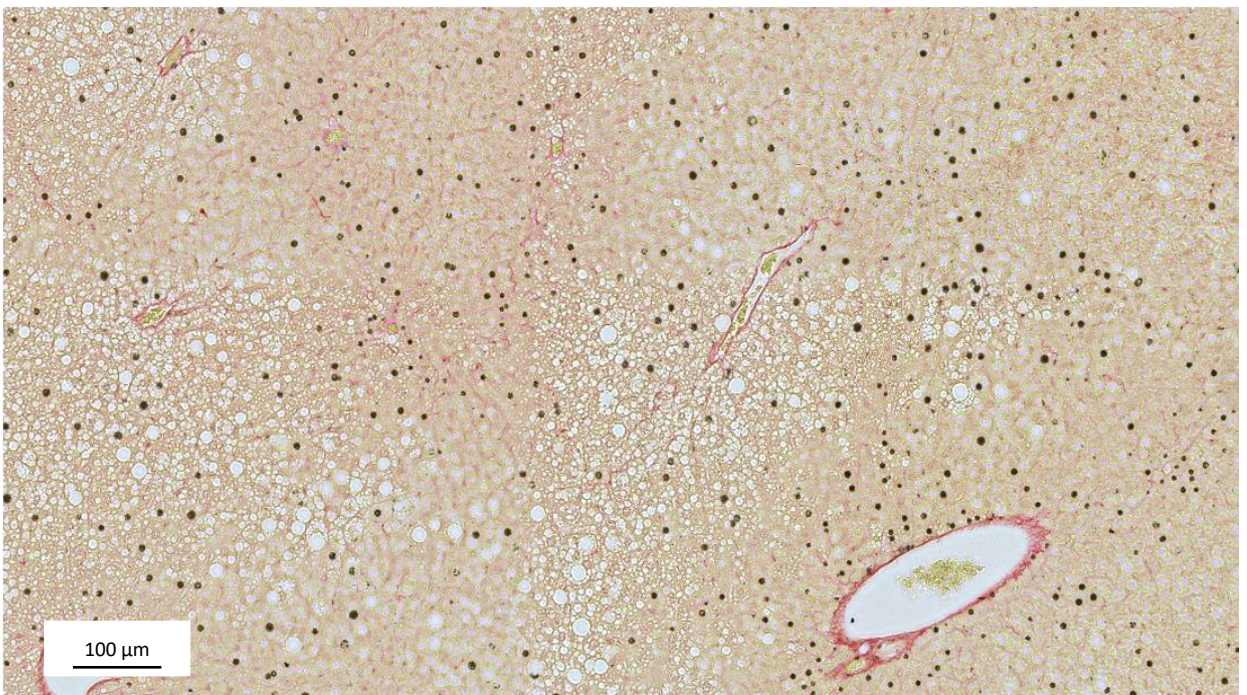



CDHFD-C-13

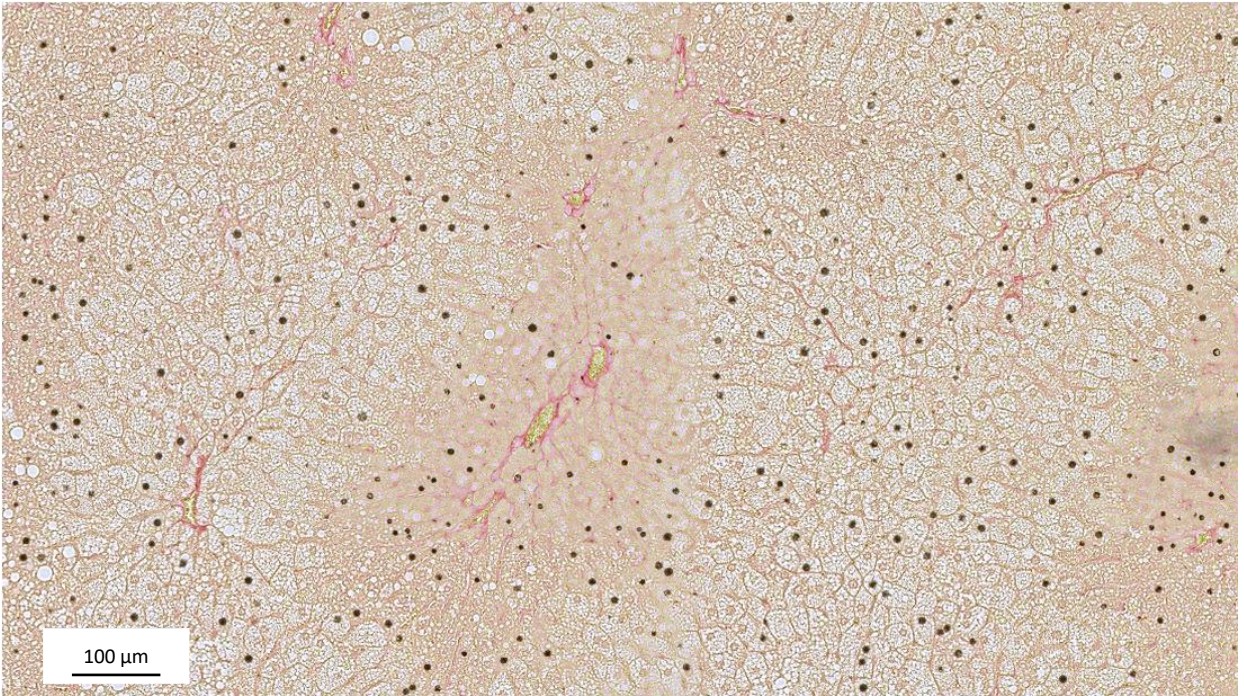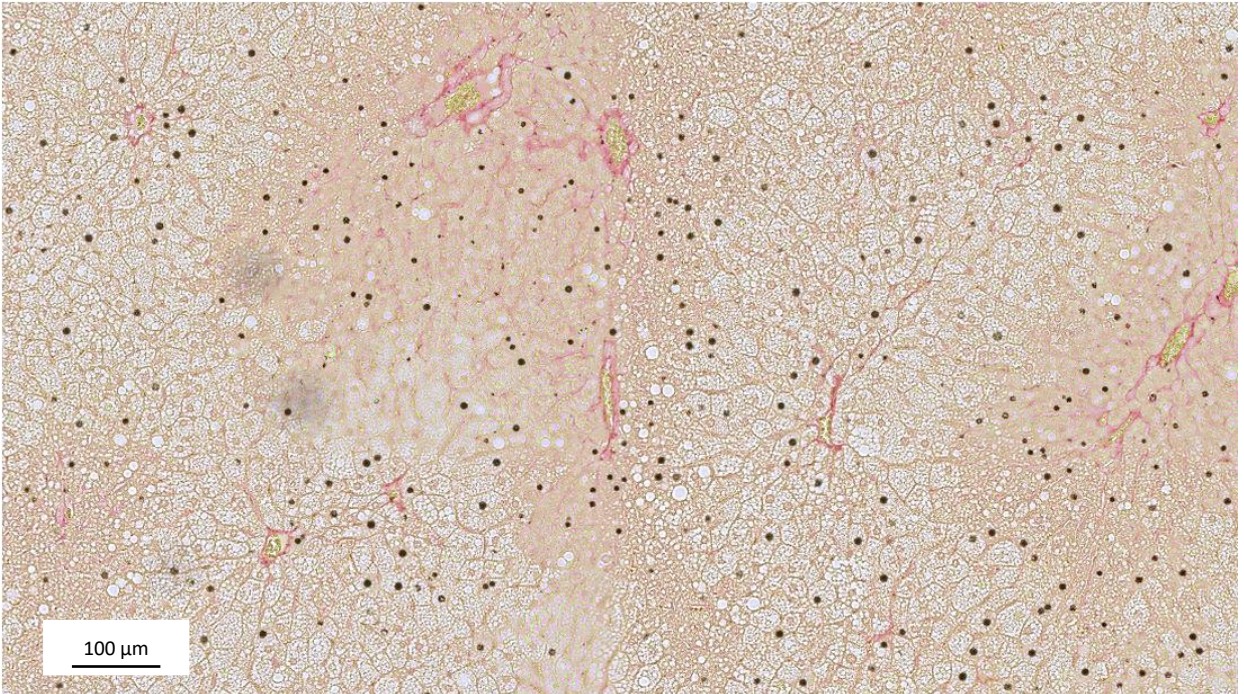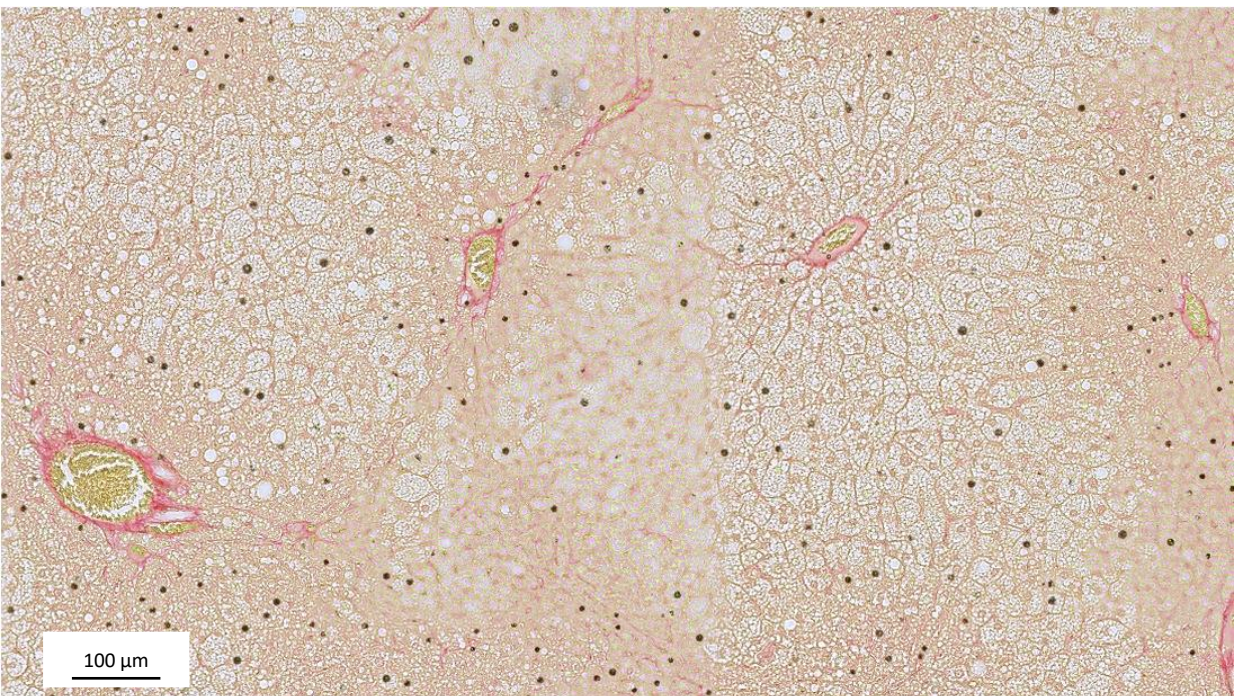

# CDHFD-C-14

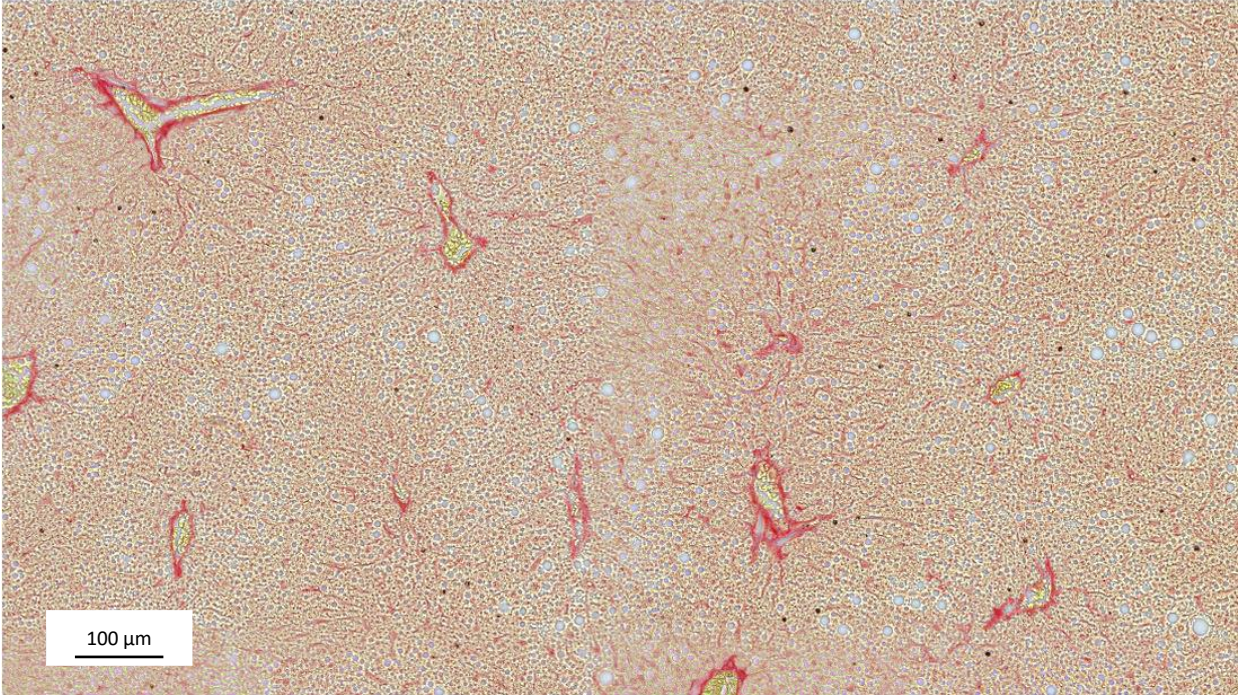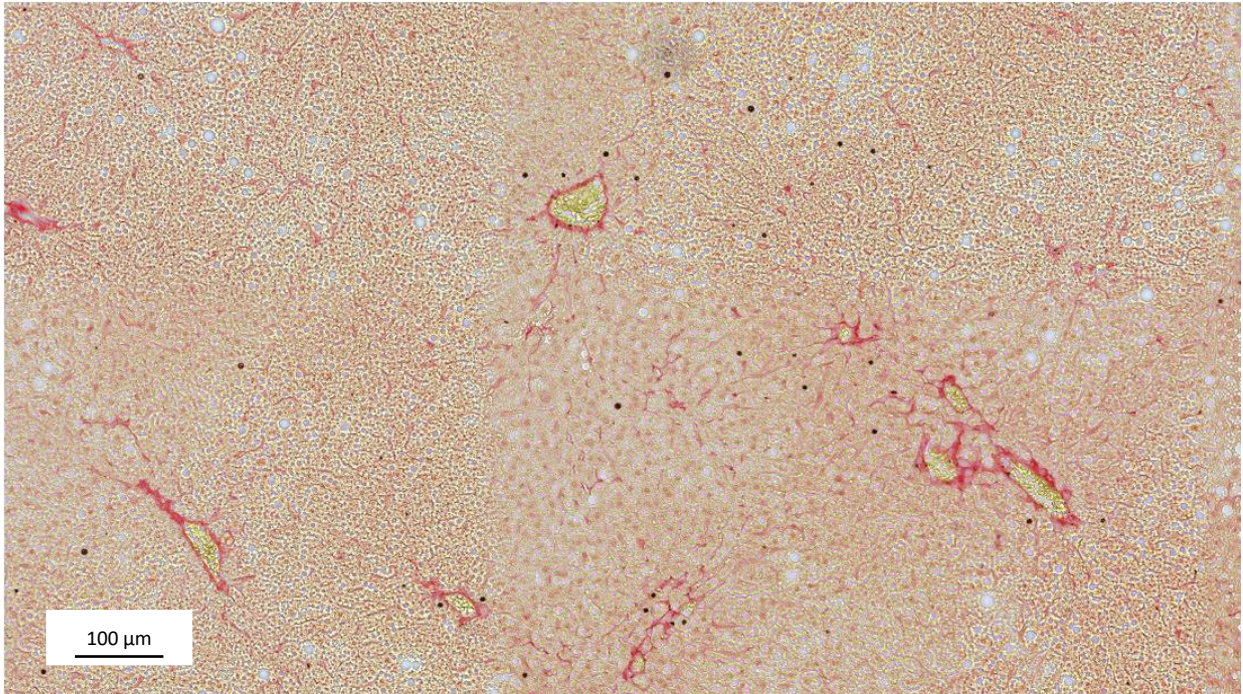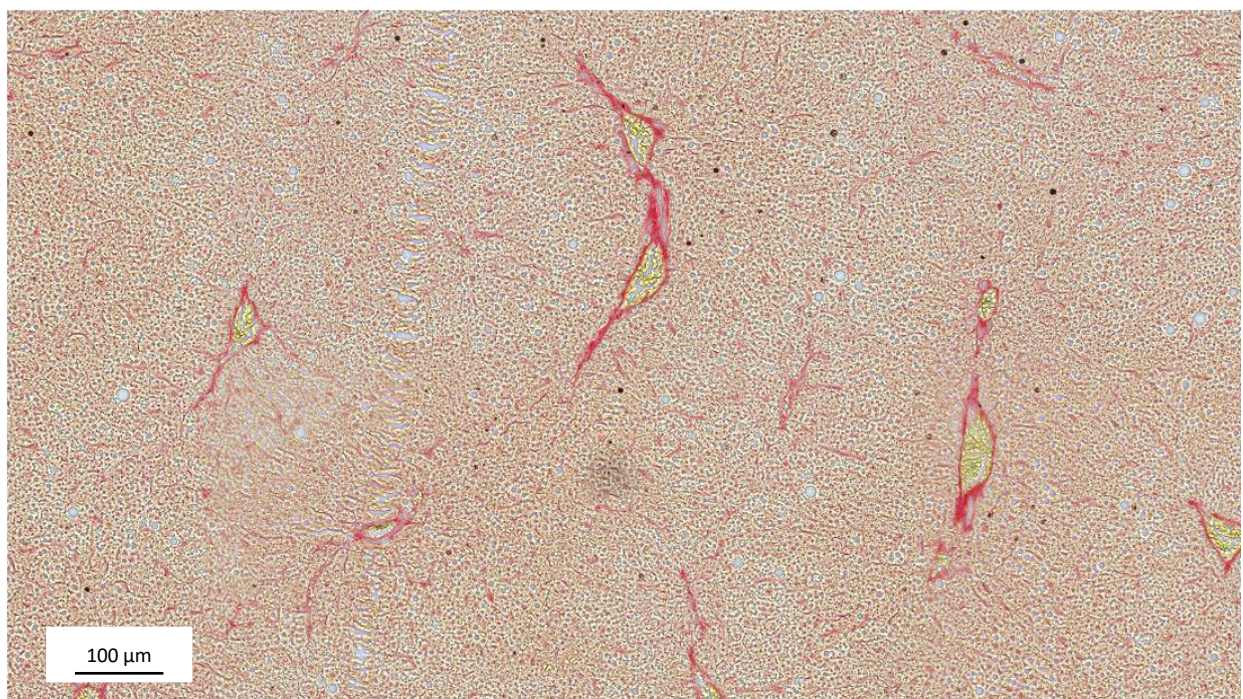

# CDHFD-C-15

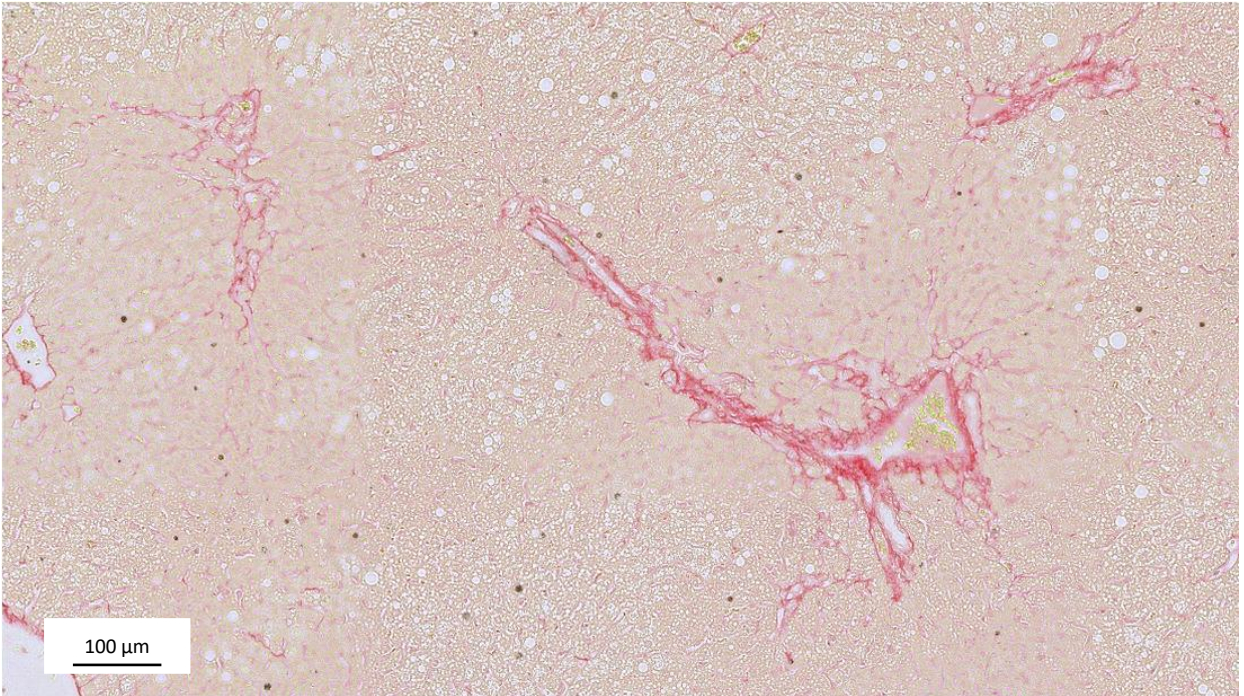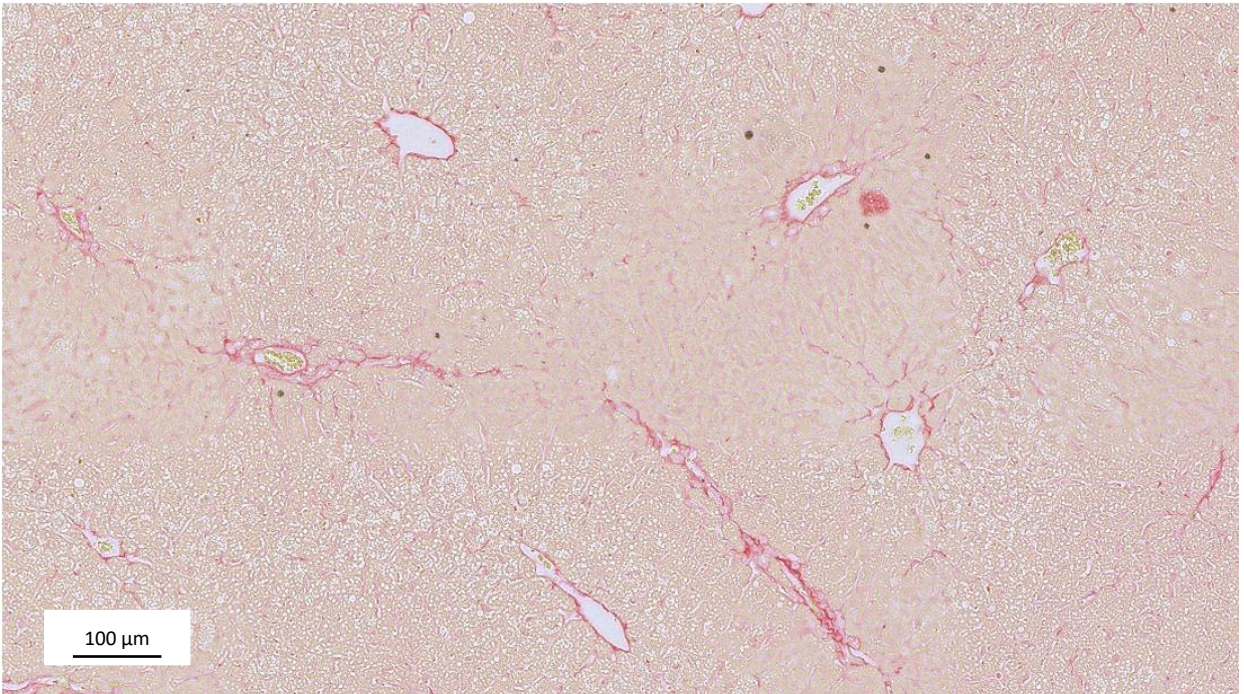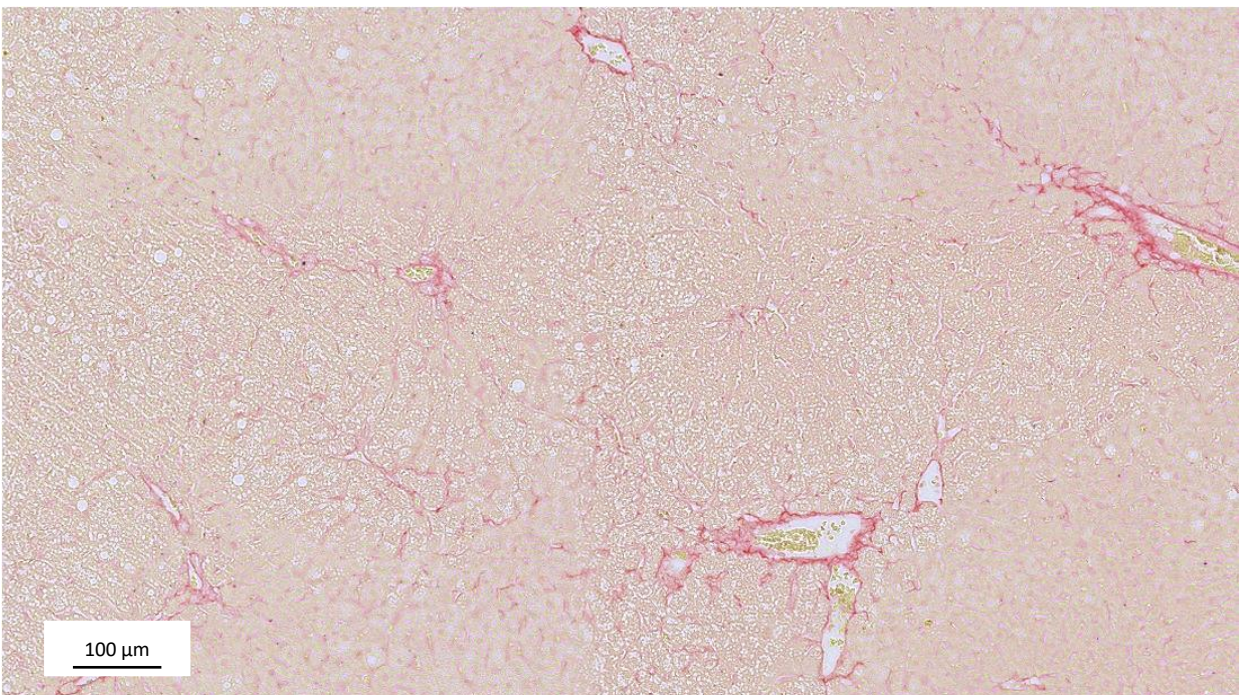

Supplement: 41564_2023_1418_MOESM10_ESM.pdf [file 41564_2023_1418_MOESM10_ESM.pdf]
