# Supplementary material for: Parabacteroides distasonis uses dietary inulin to suppress NASH via its metabolite pentadecanoic acid
Source: PubMed Central journal article supplement (PMC10390331; doi:10.1038/s41564-023-01418-7), 2023-06-29

## Source images for Figure 3

H&E staining

Replicate images from a same mouse were  
displayed within a same page

**H&E Staining**

**NCD group**

(5 mice were included)

# NCD-1

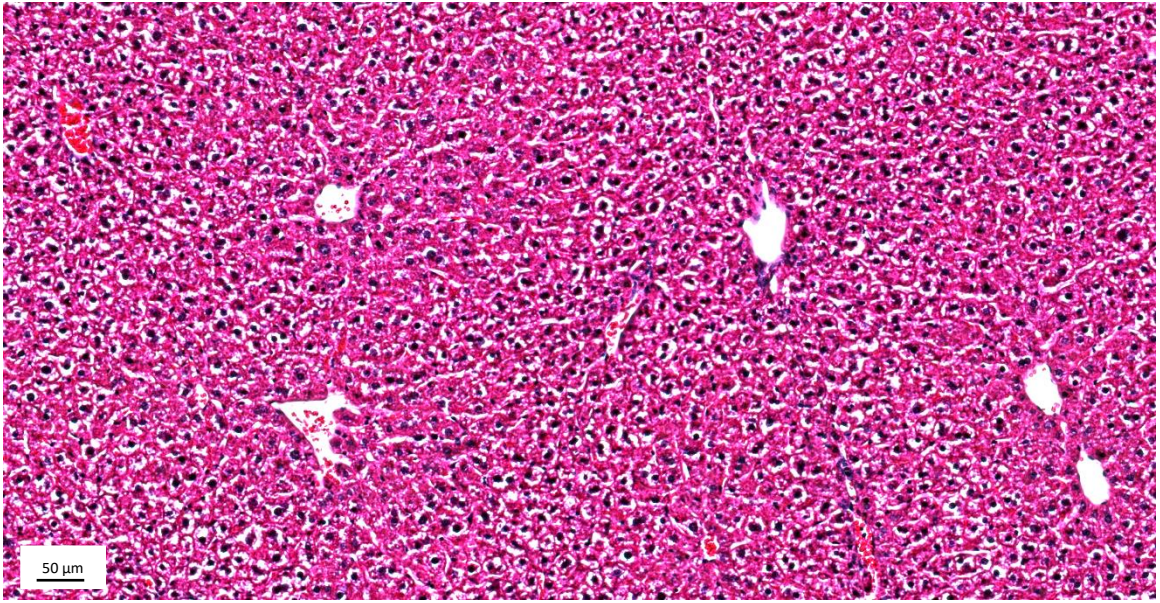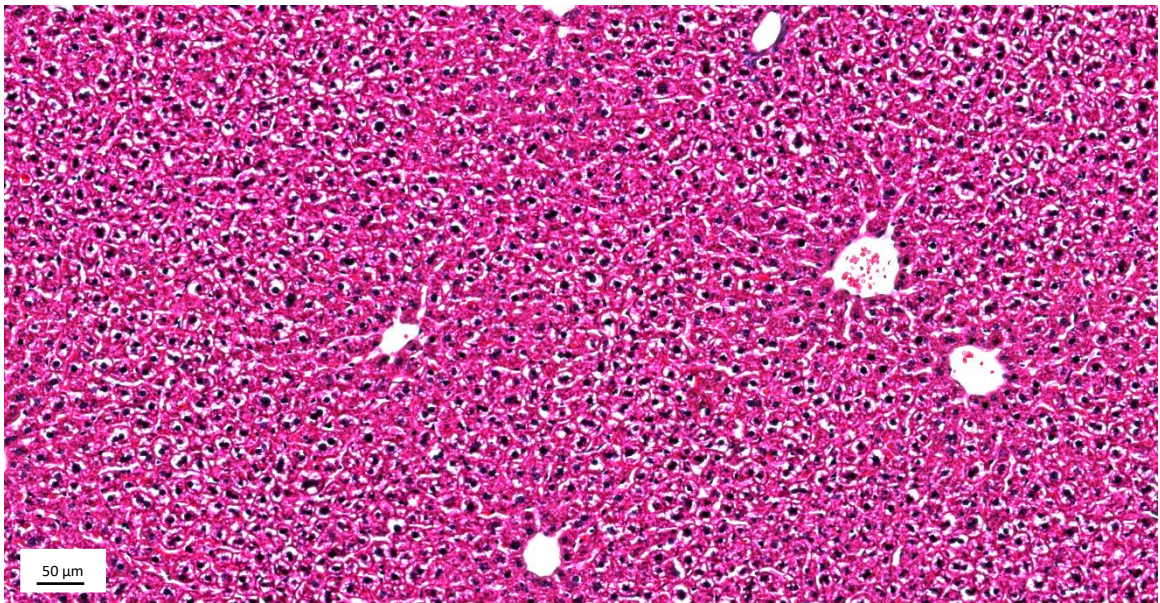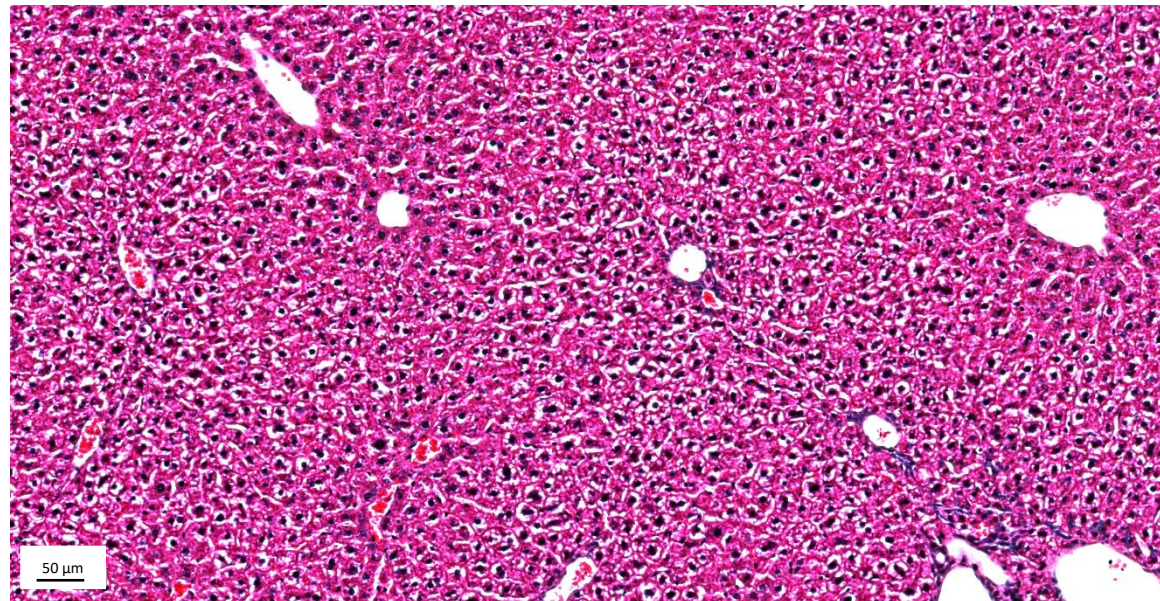

# NCD-2

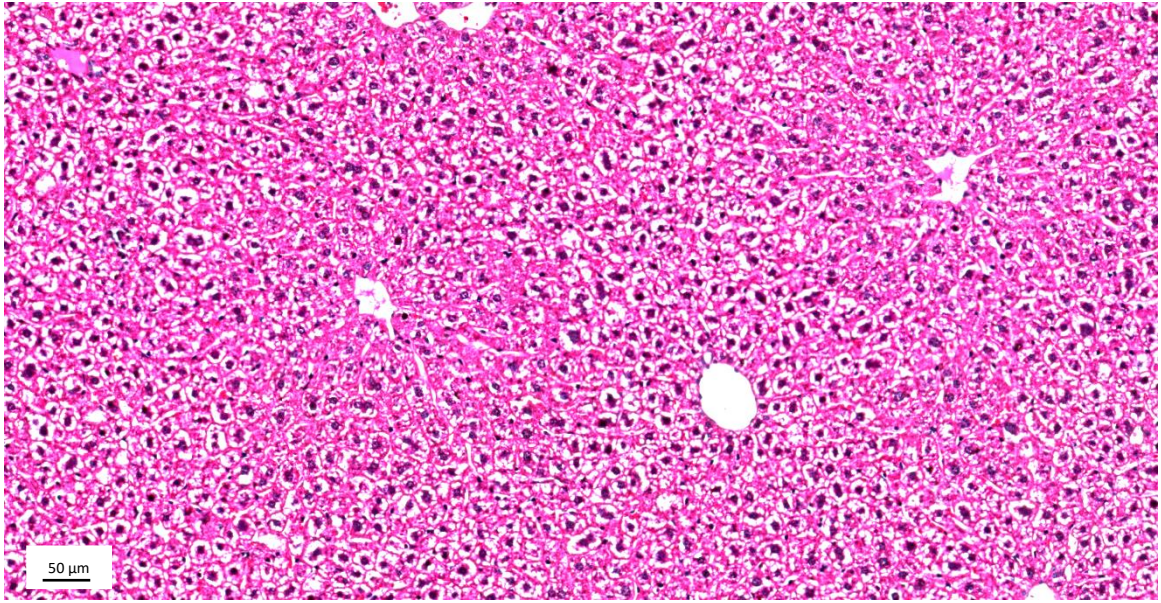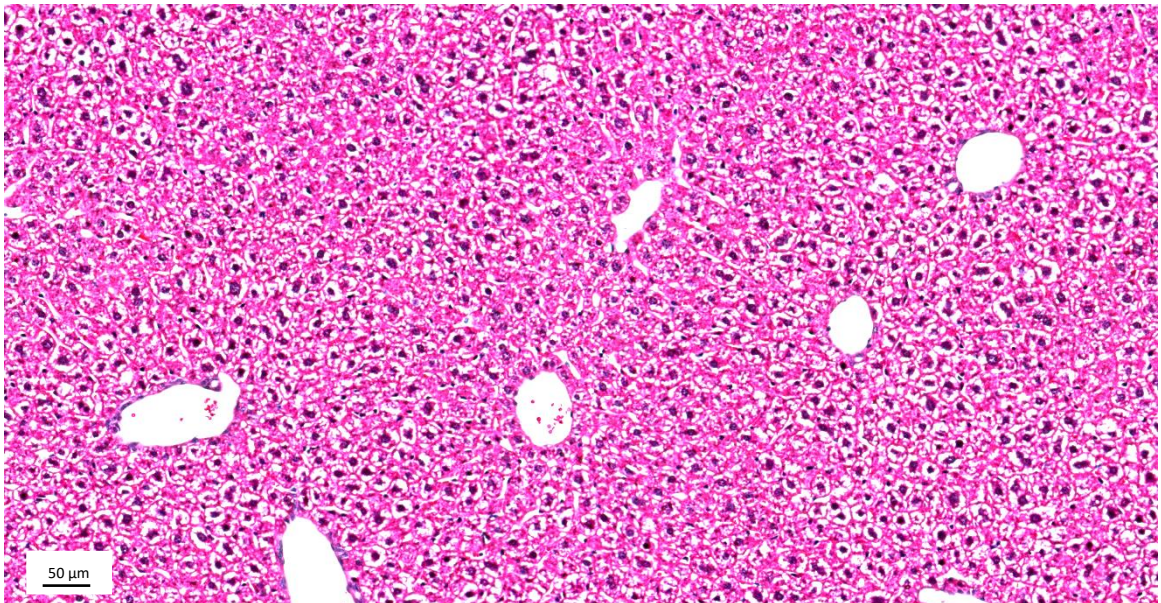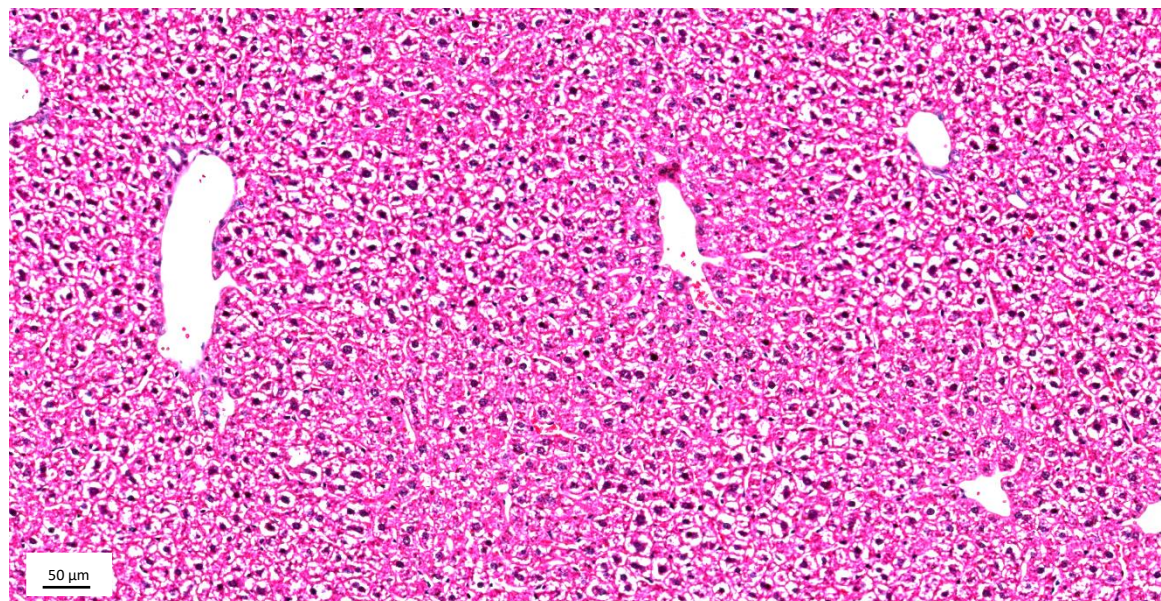

# NCD-3

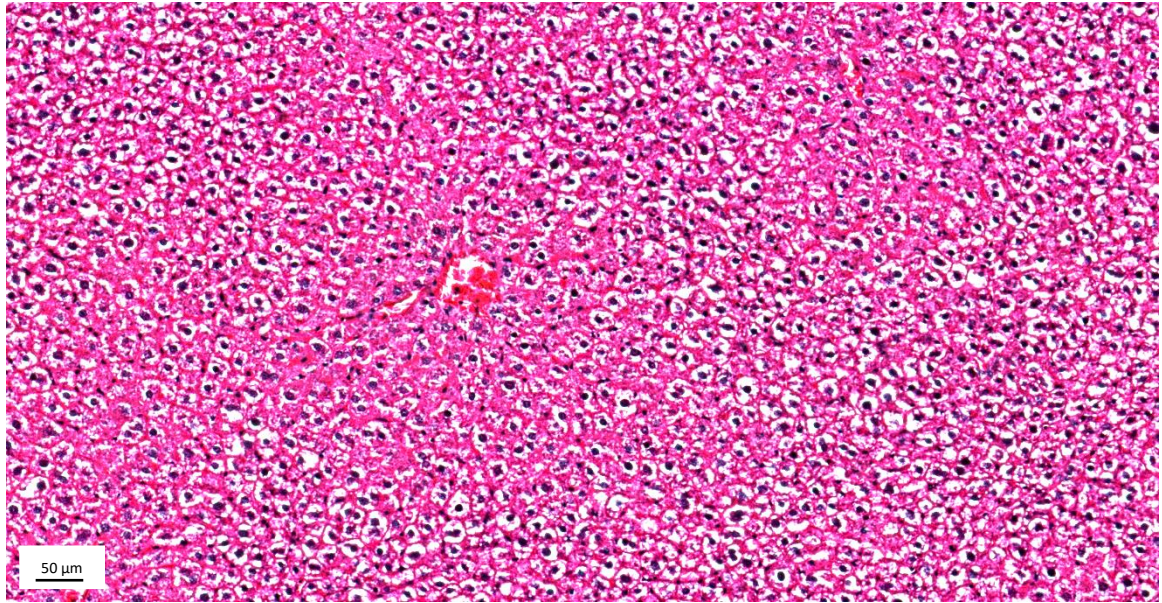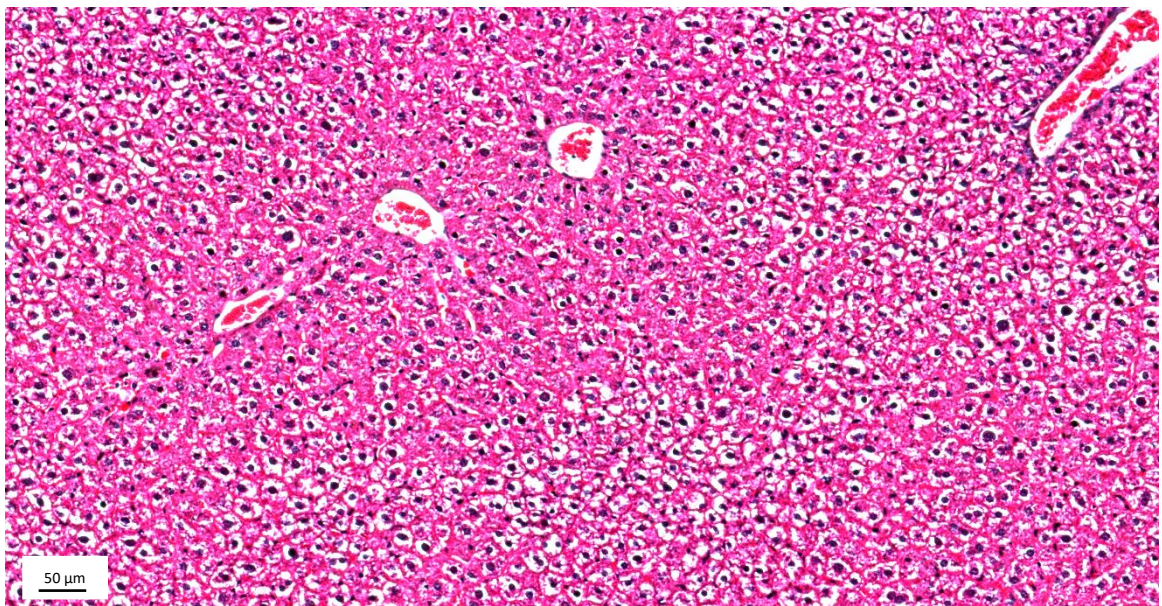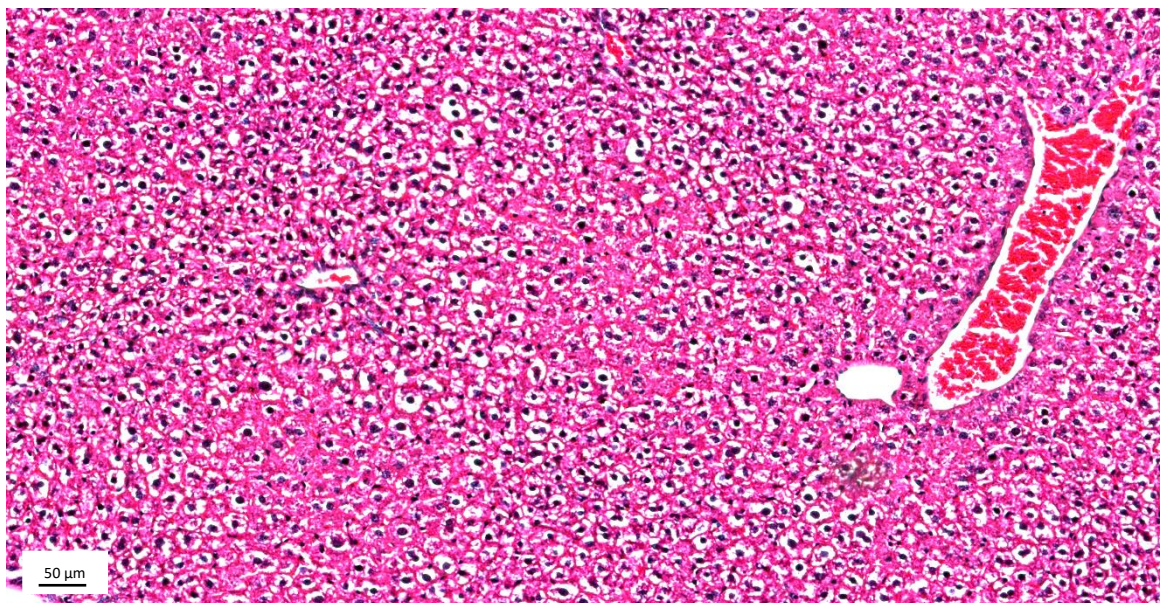

# NCD-4

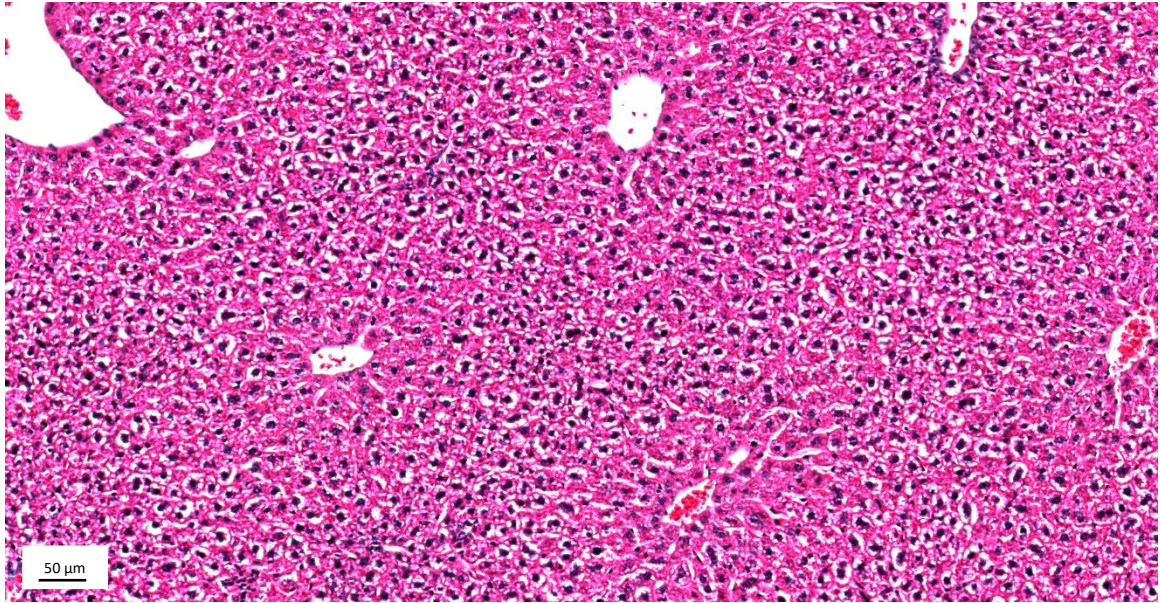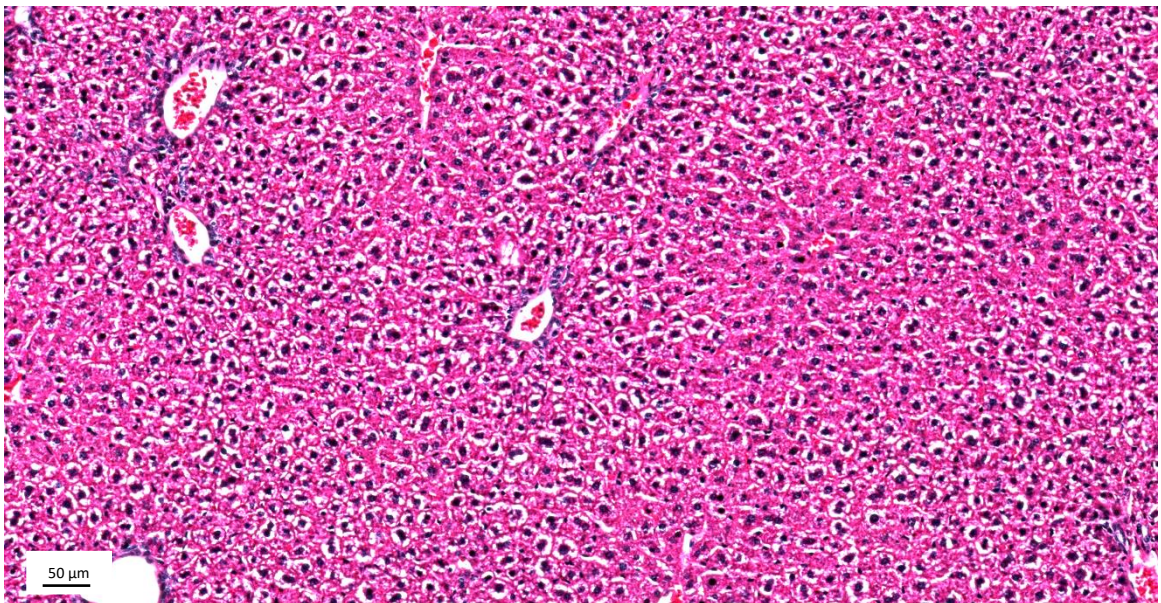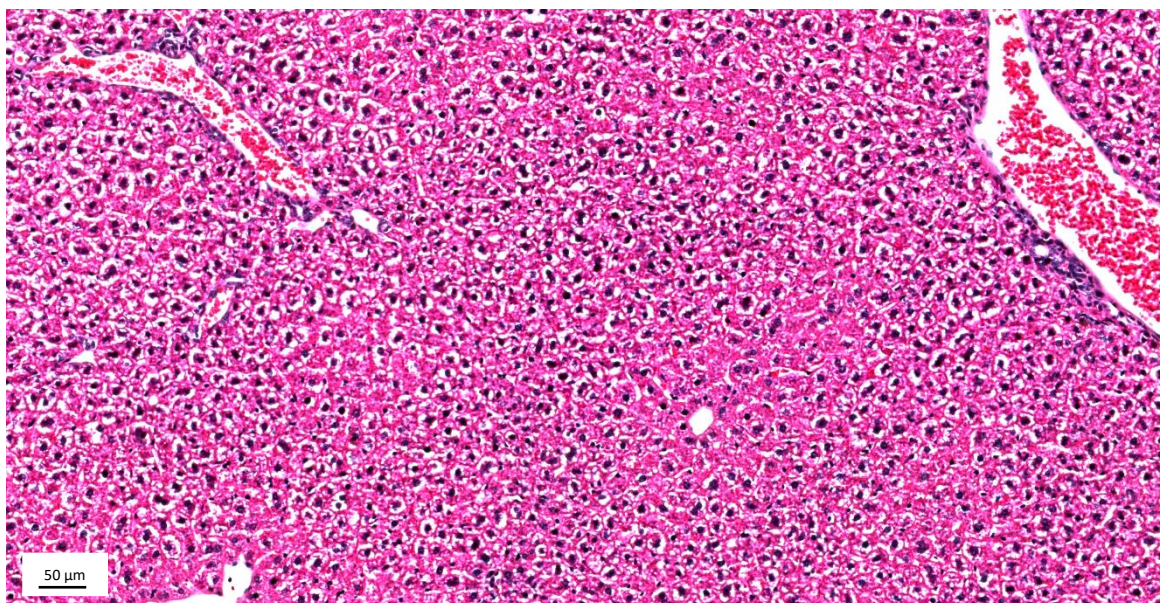

# NCD-5

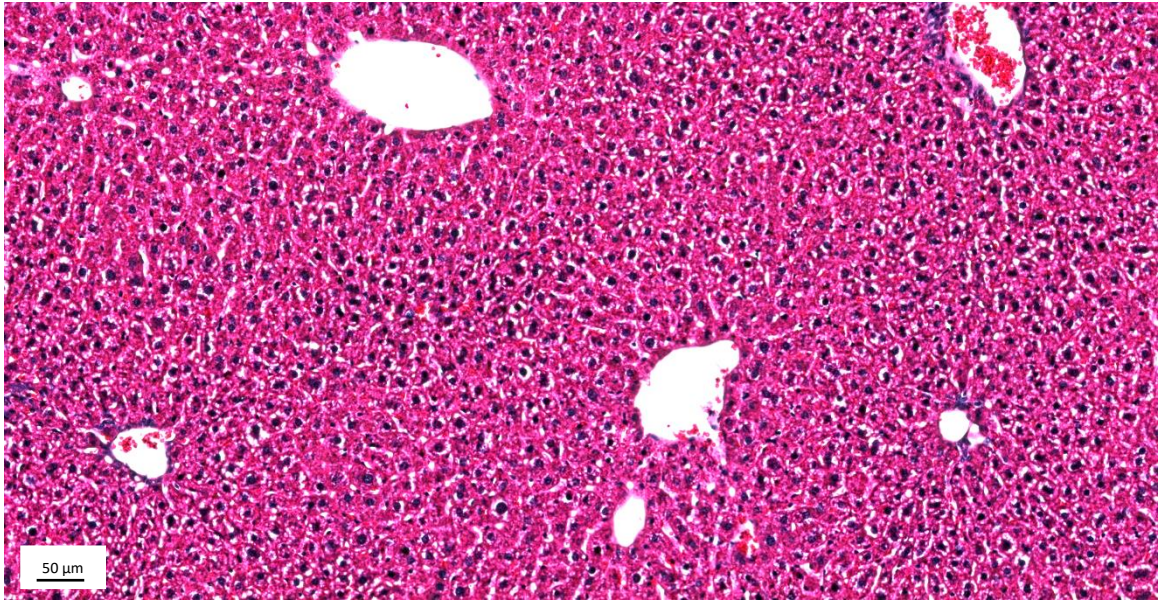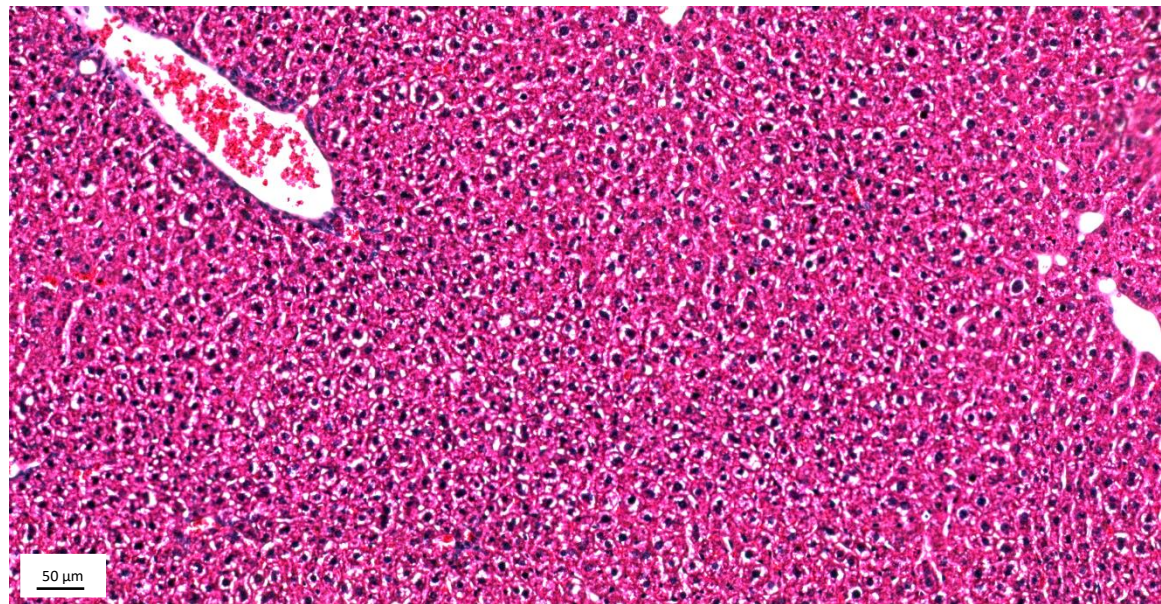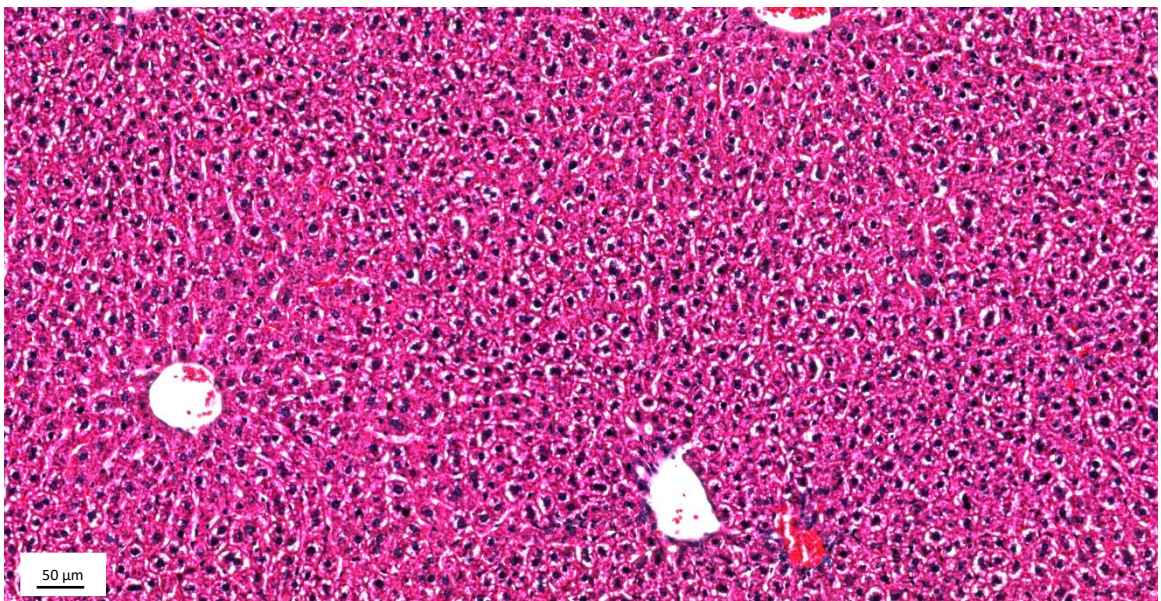

## **H&E Staining**

**CDHFD + PBS group**

(14 mice were included)



# CDHFD + PBS-1

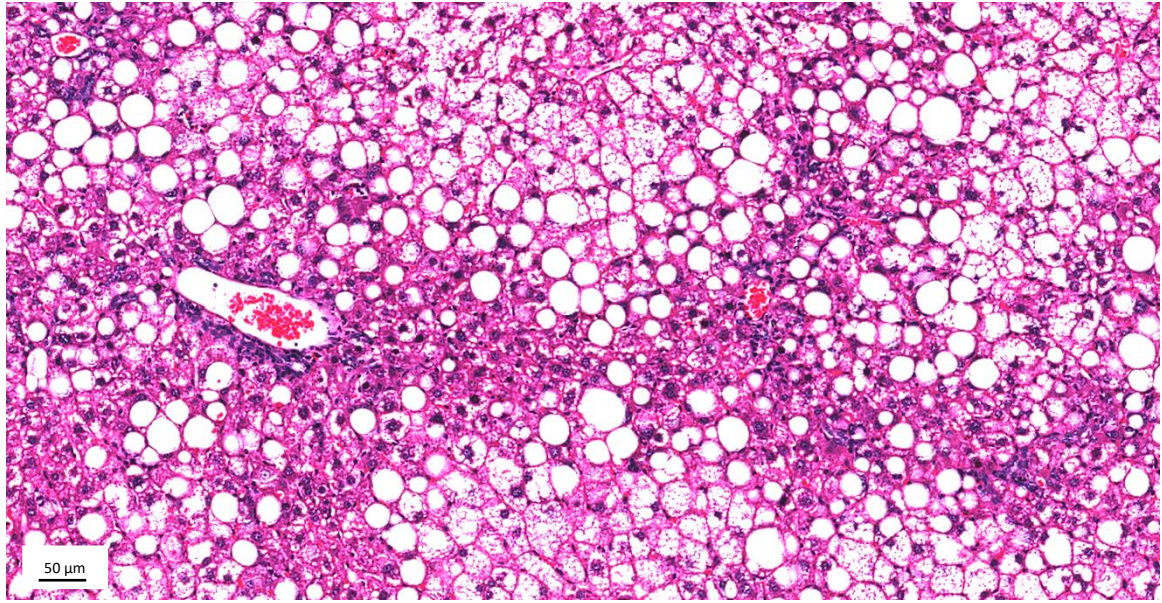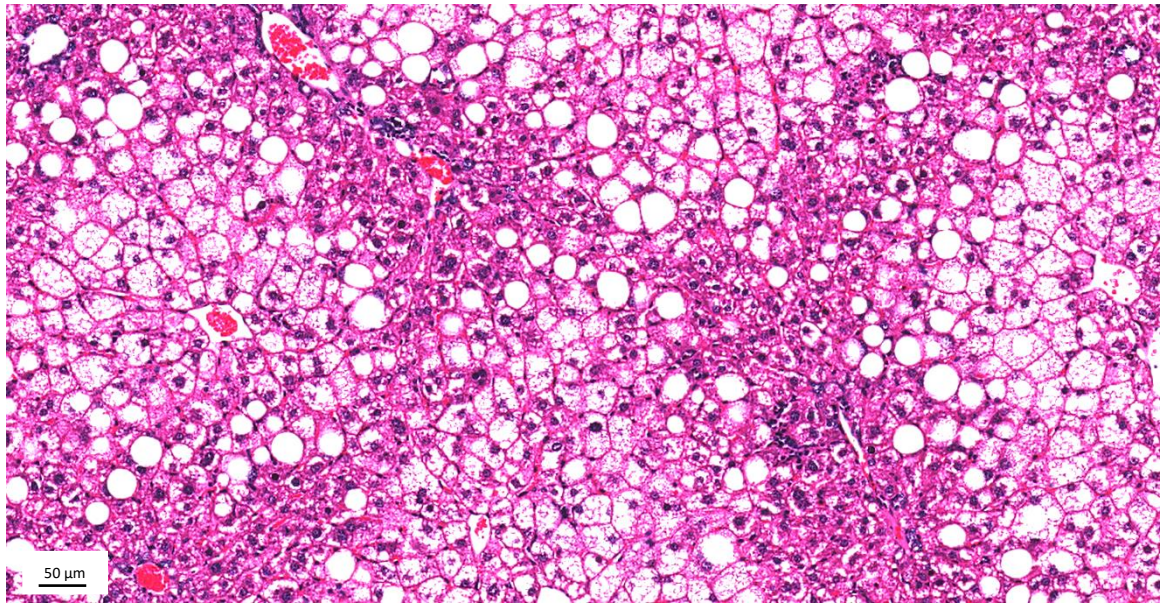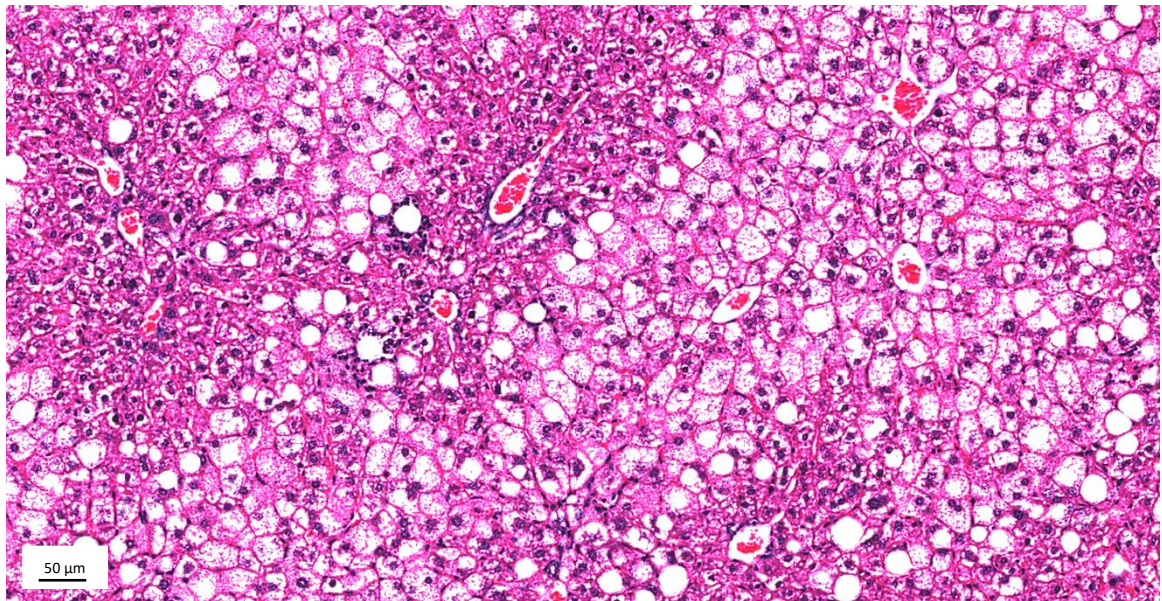

# CDHFD + PBS-2

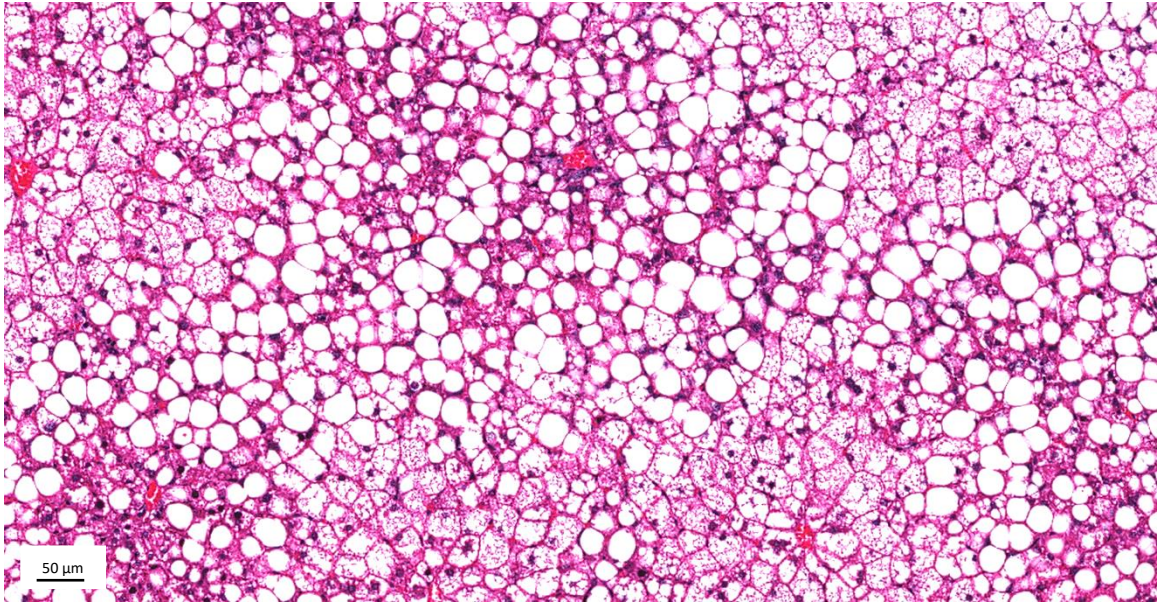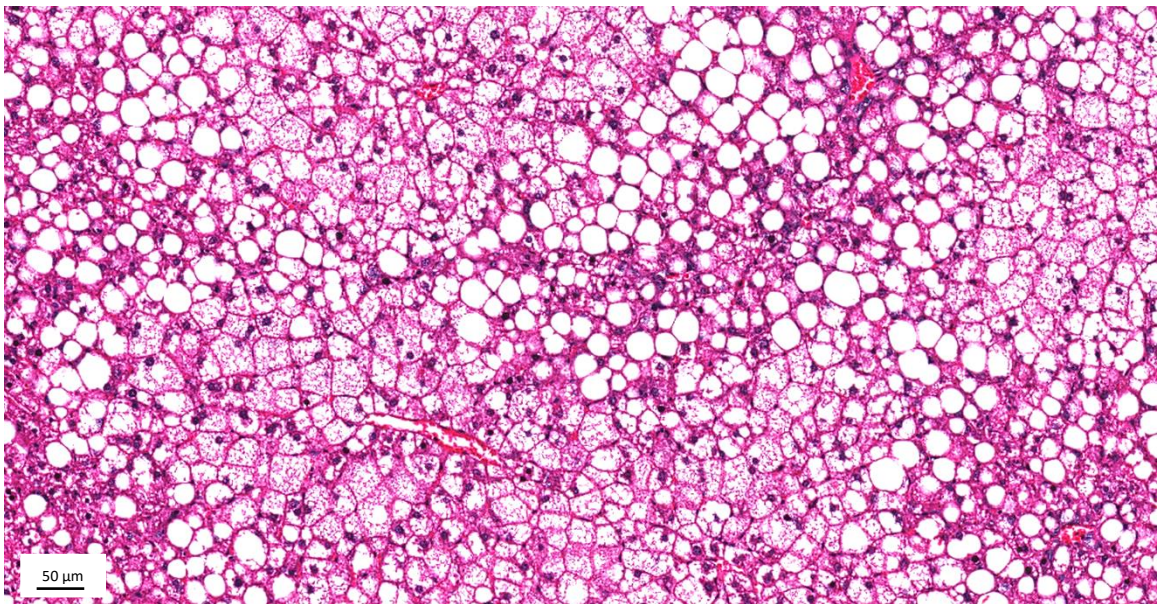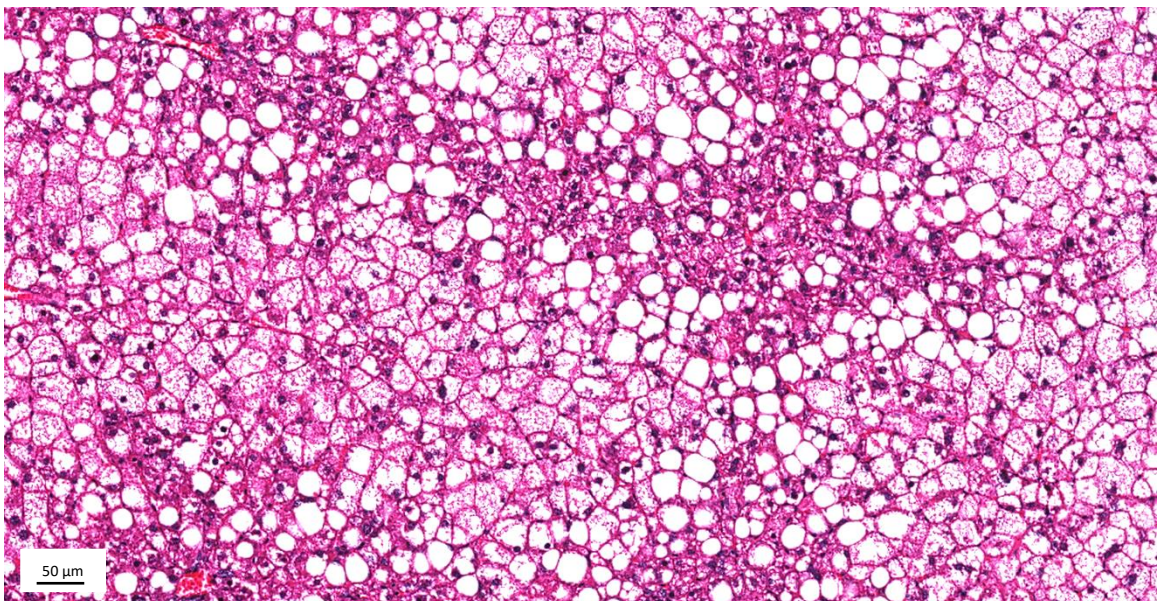

# CDHFD + PBS-3

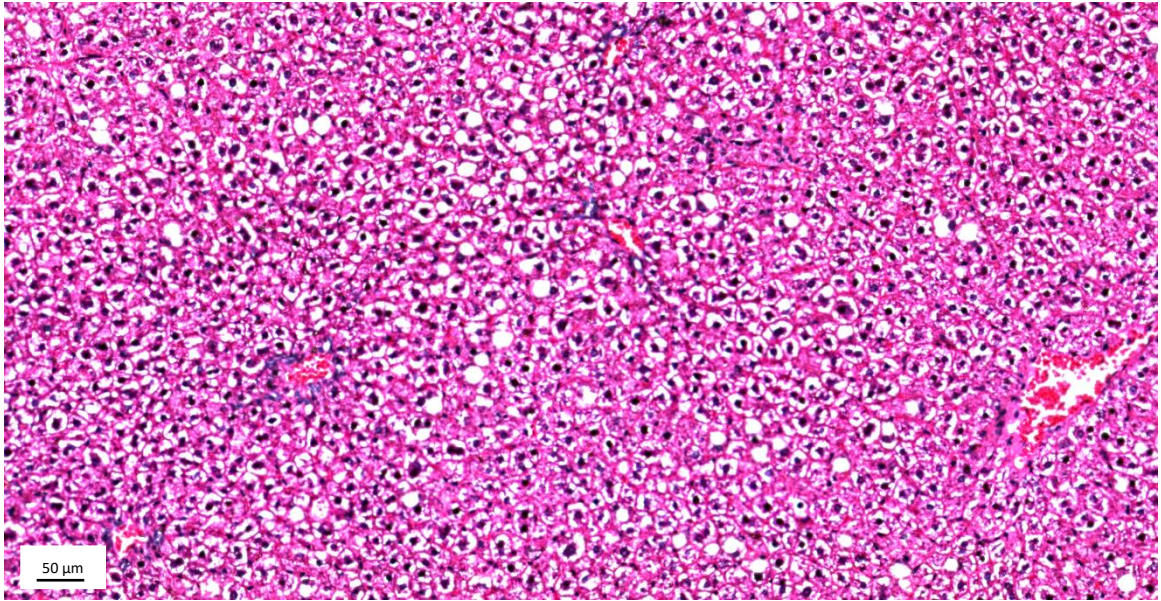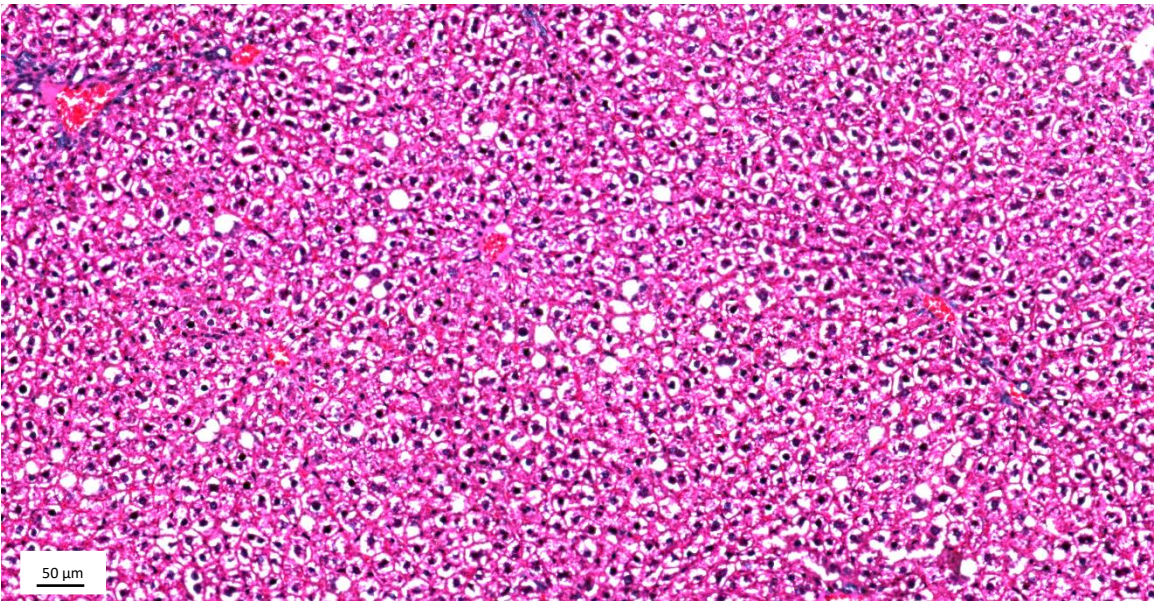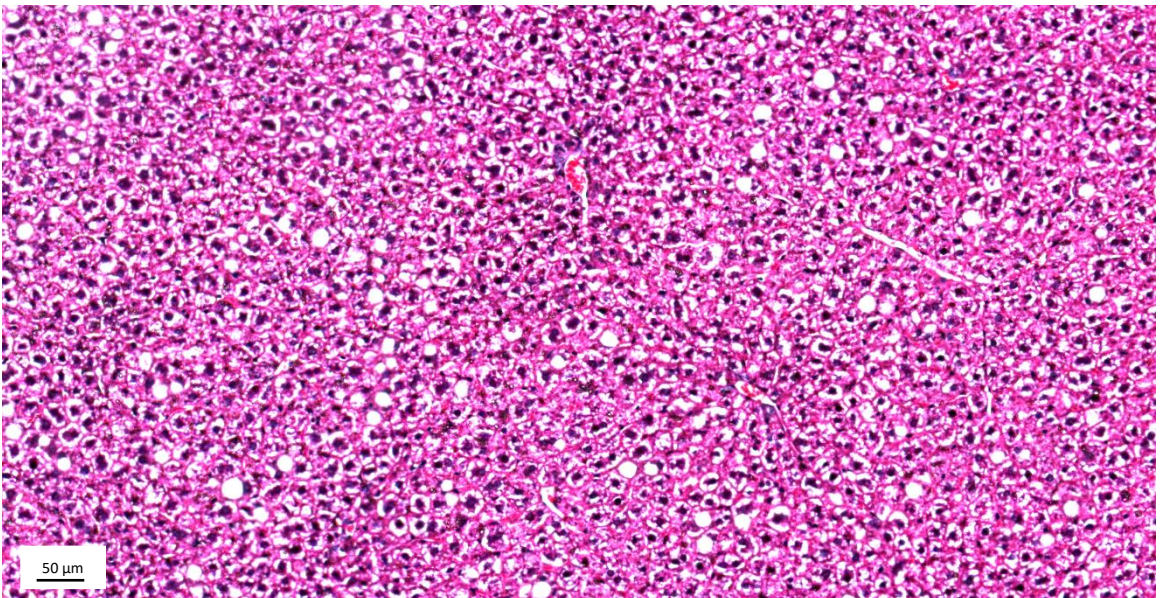

# CDHFD + PBS-4

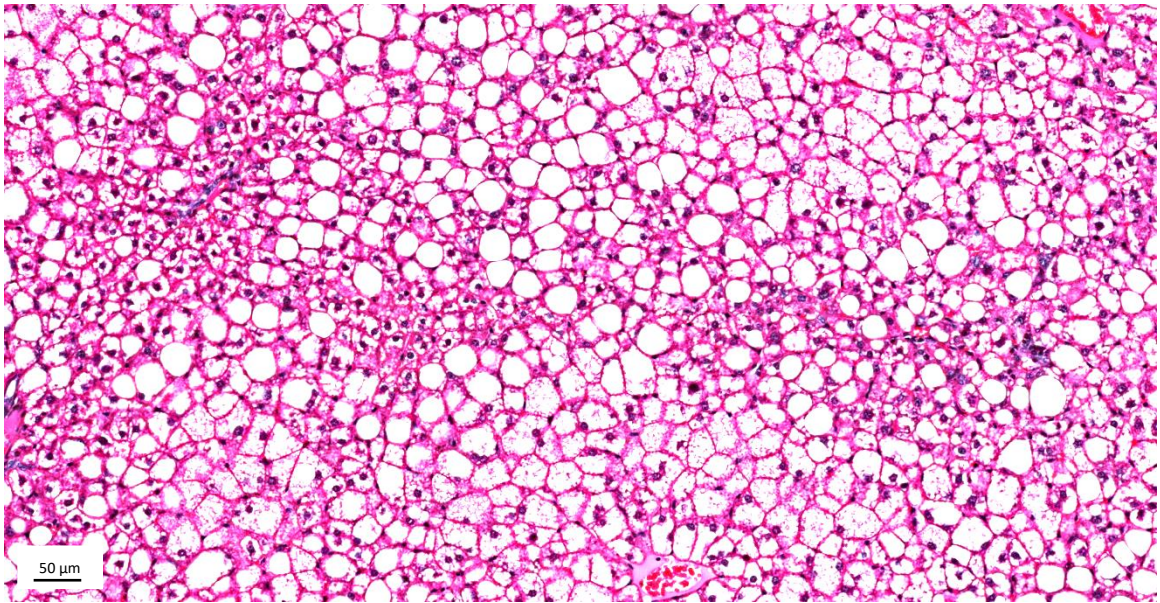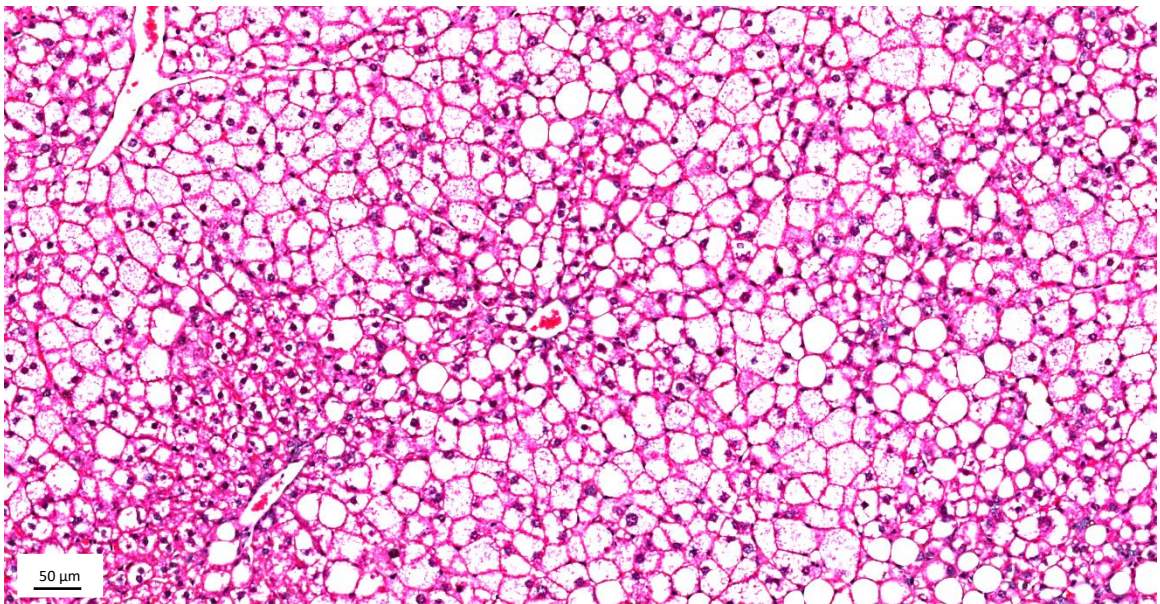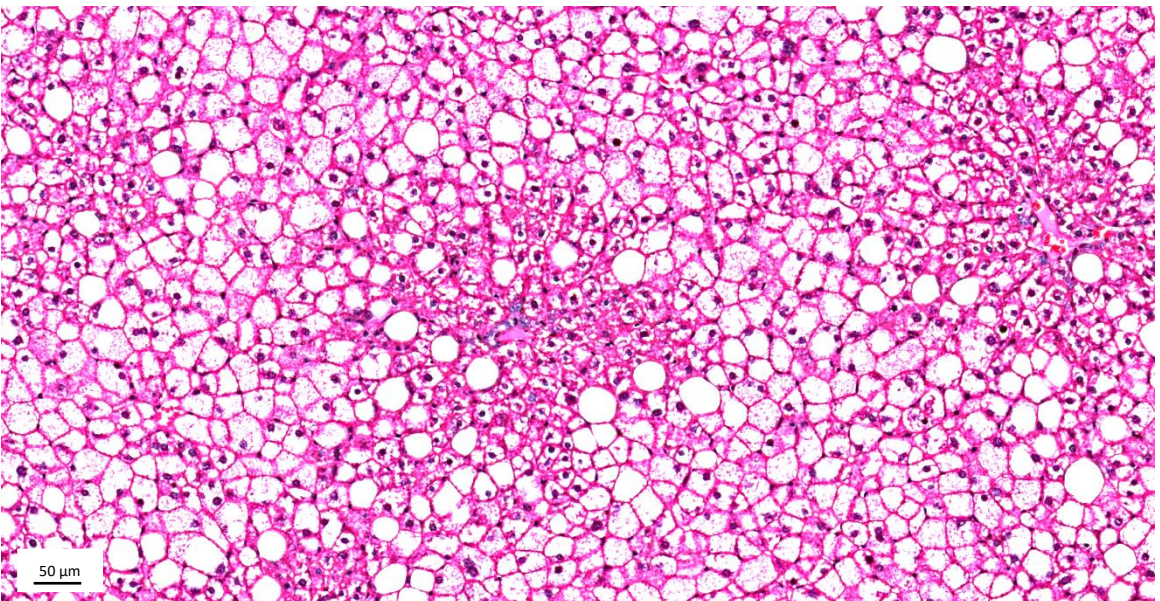

# CDHFD + PBS-5

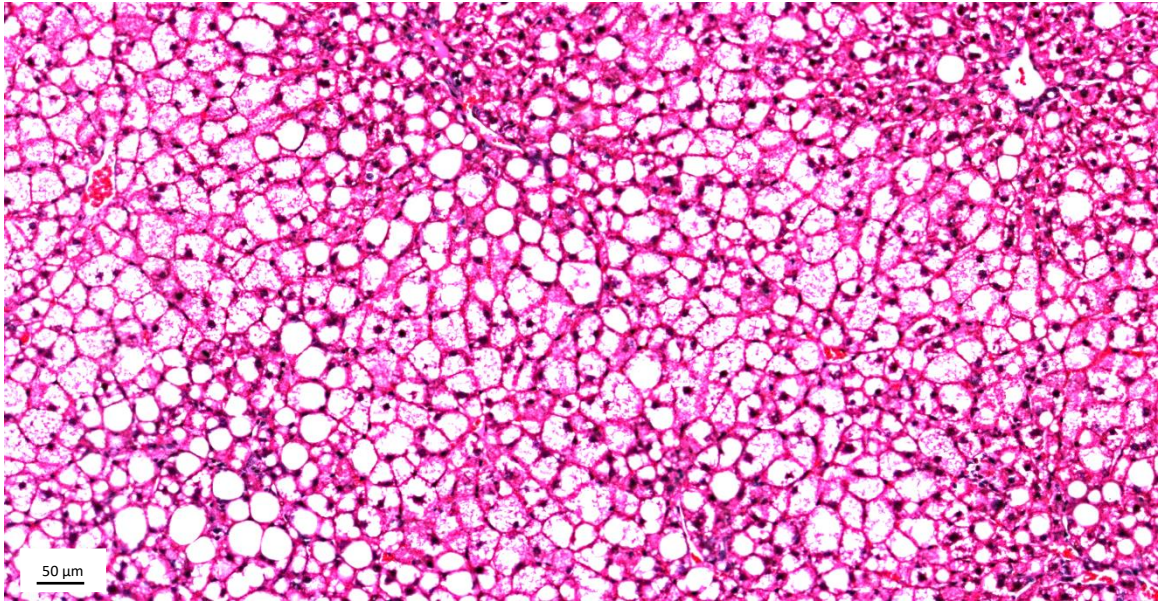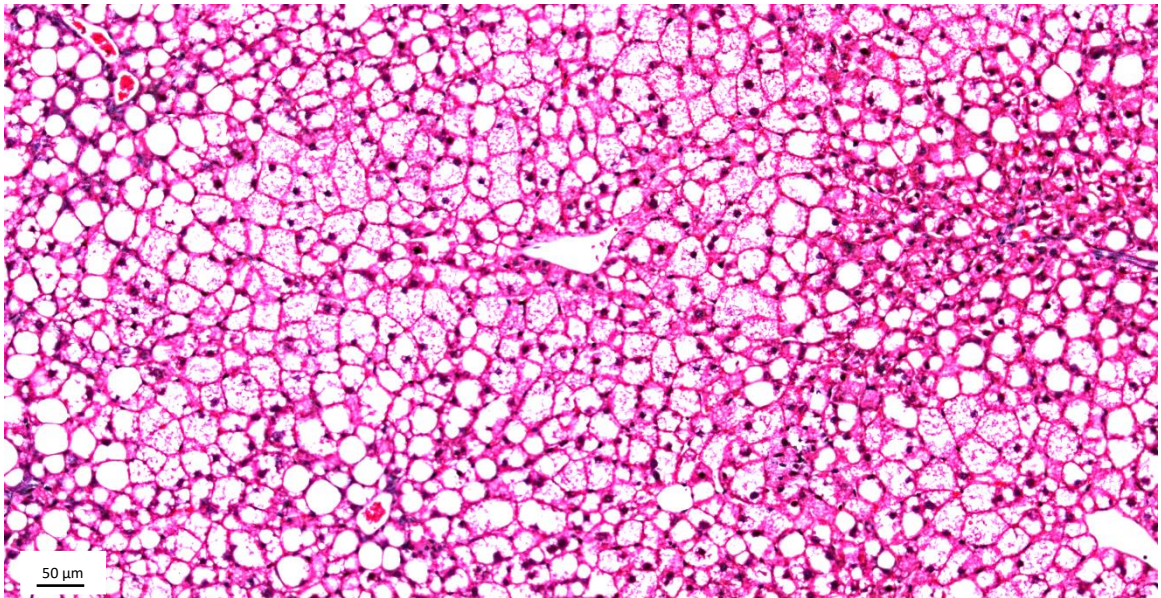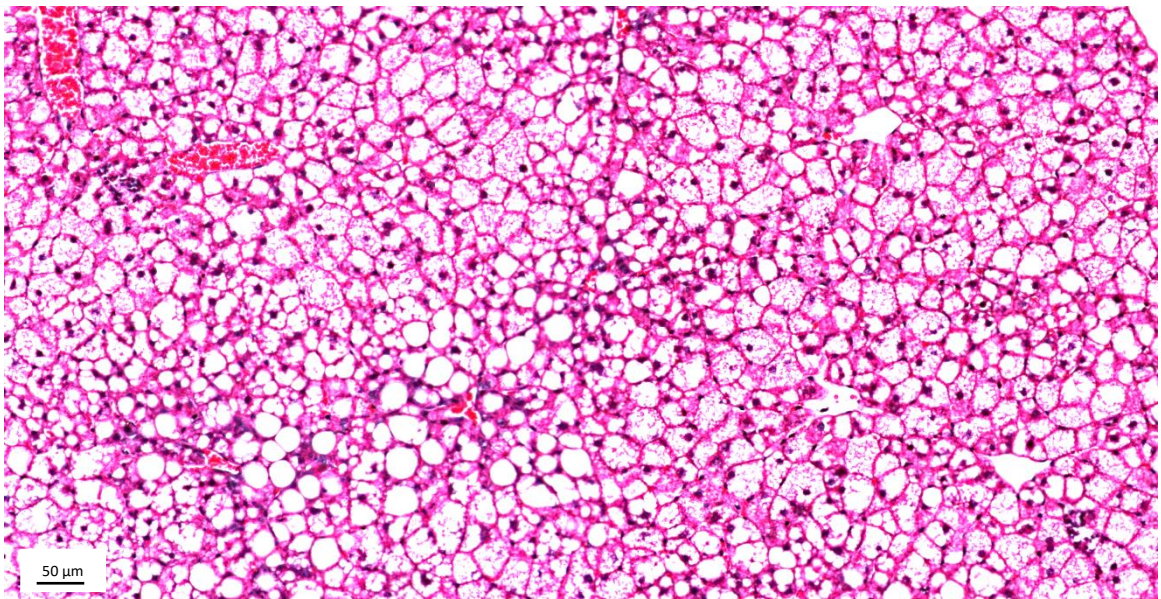

# CDHFD + PBS-6

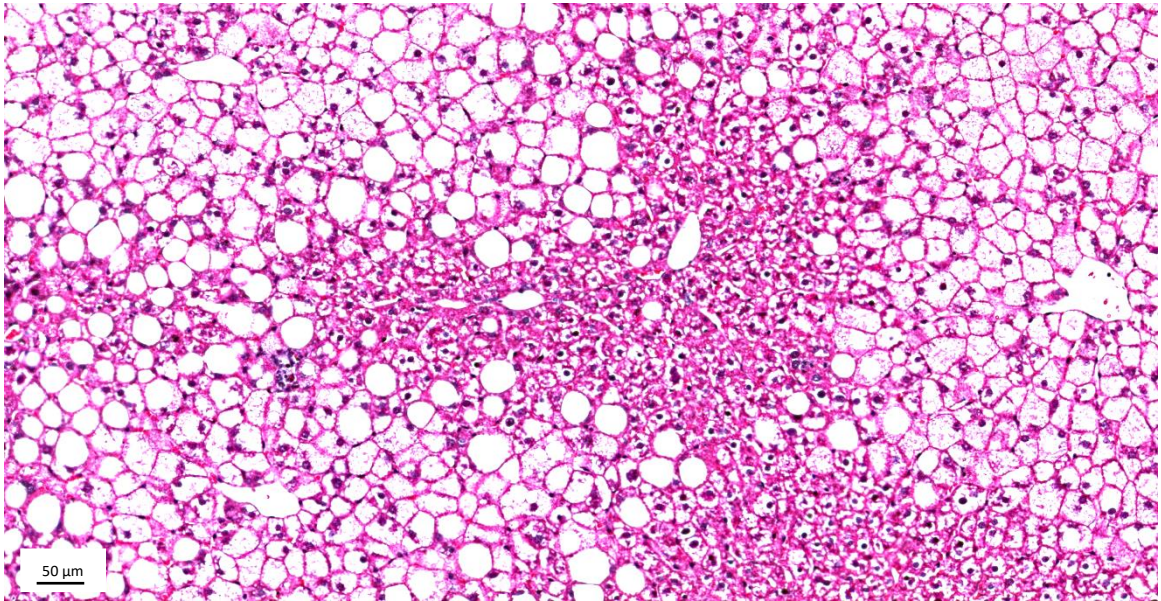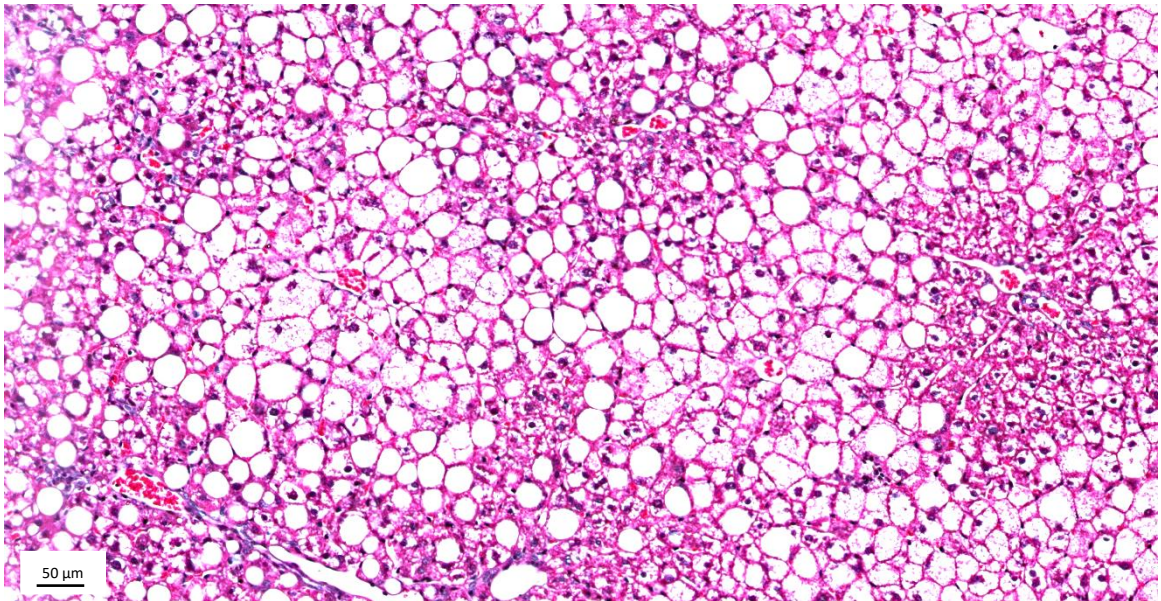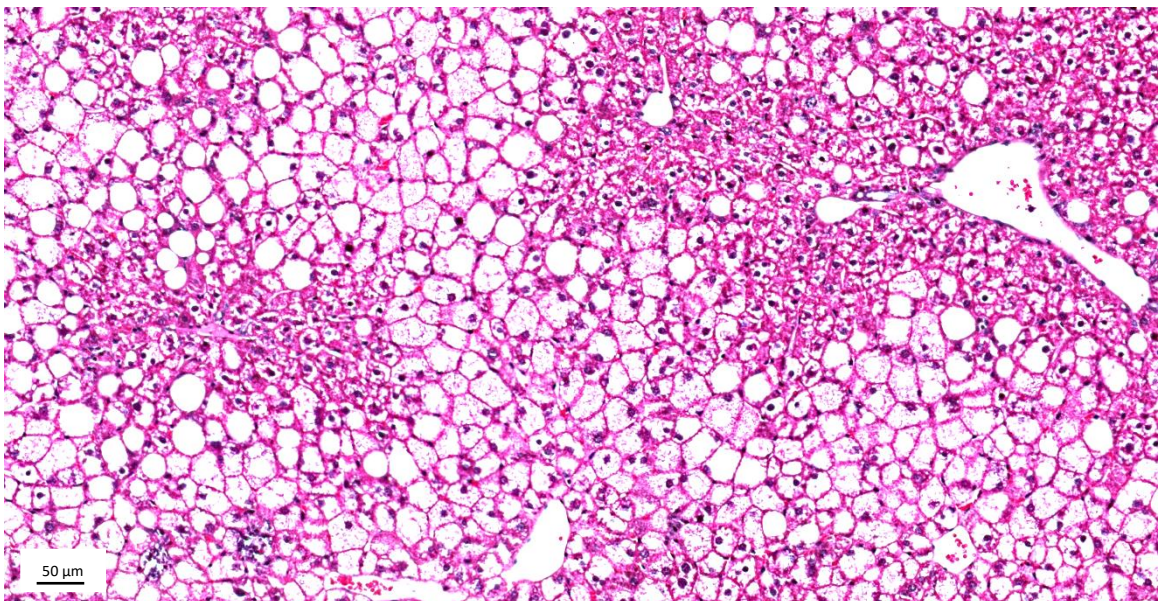

# CDHFD + PBS-7

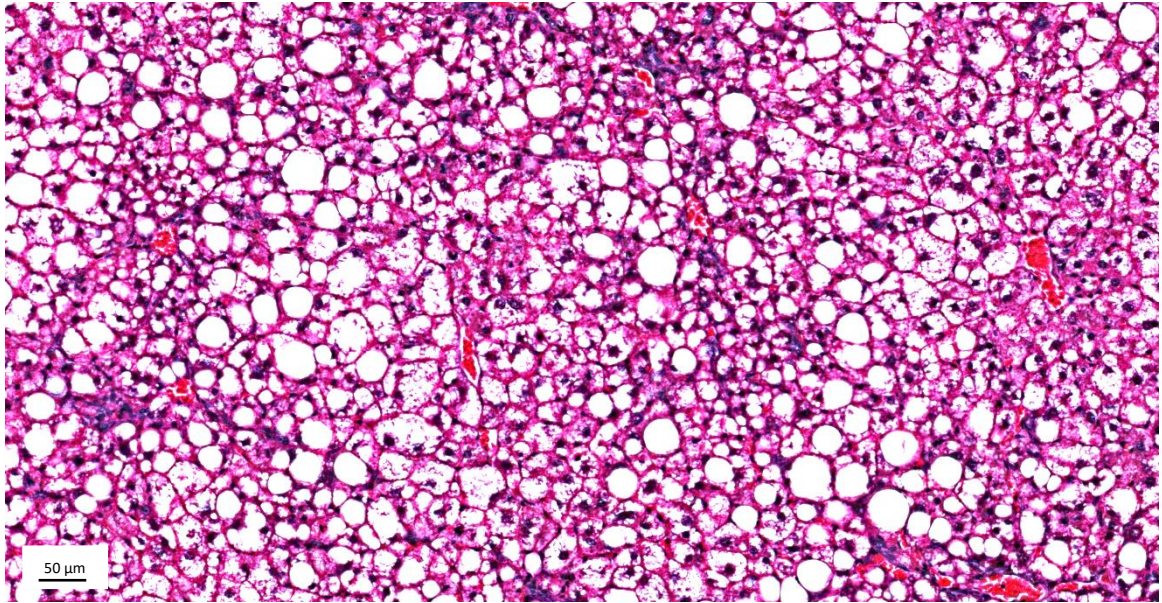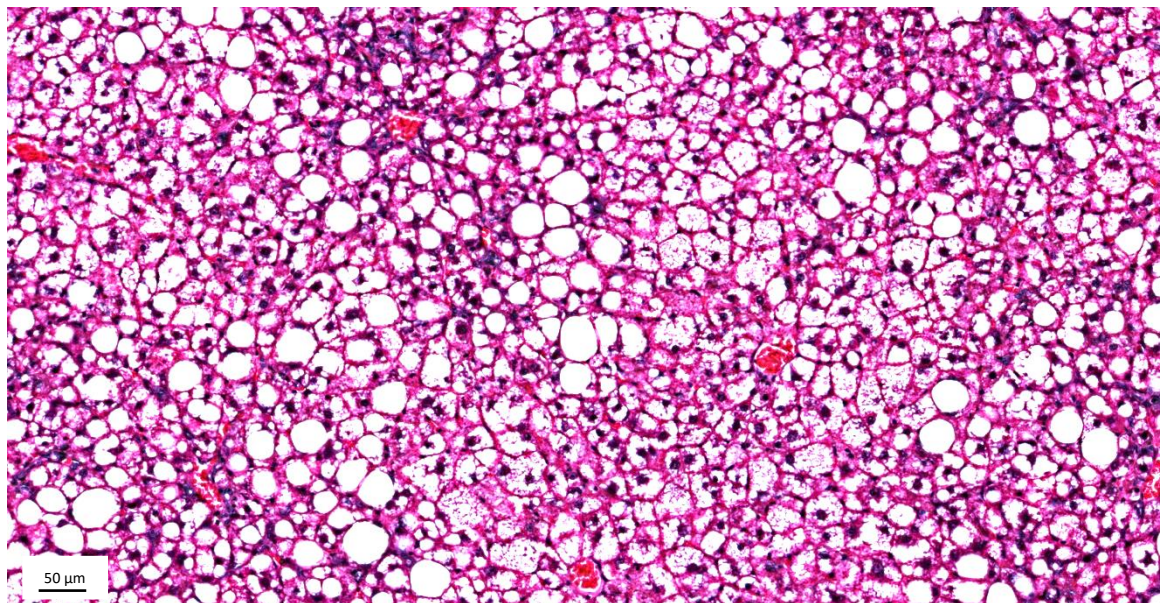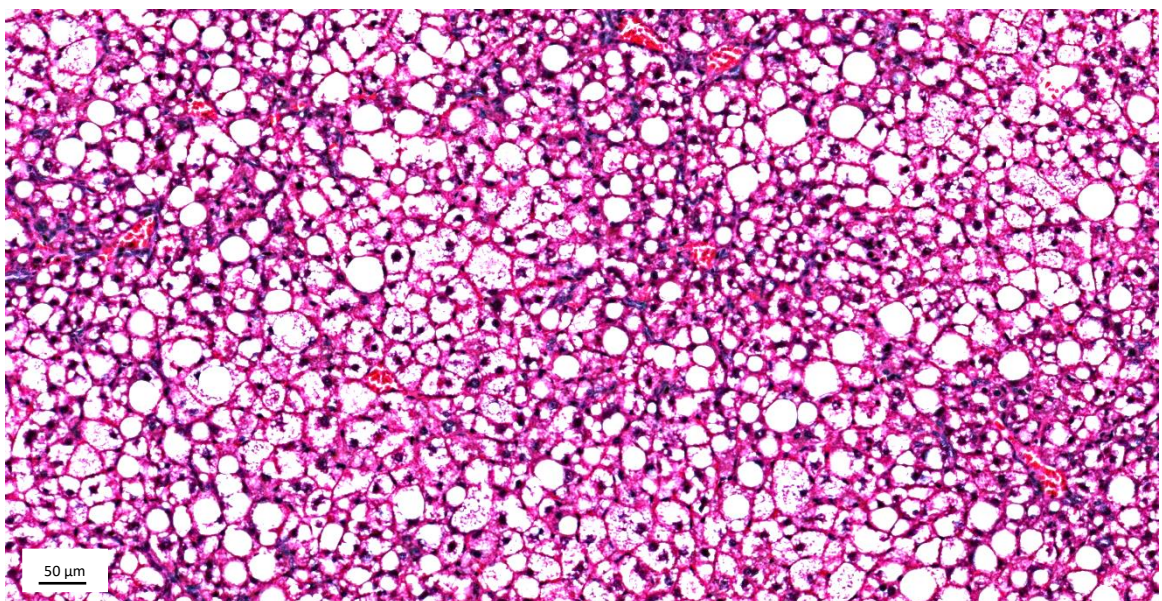

# CDHFD + PBS-8

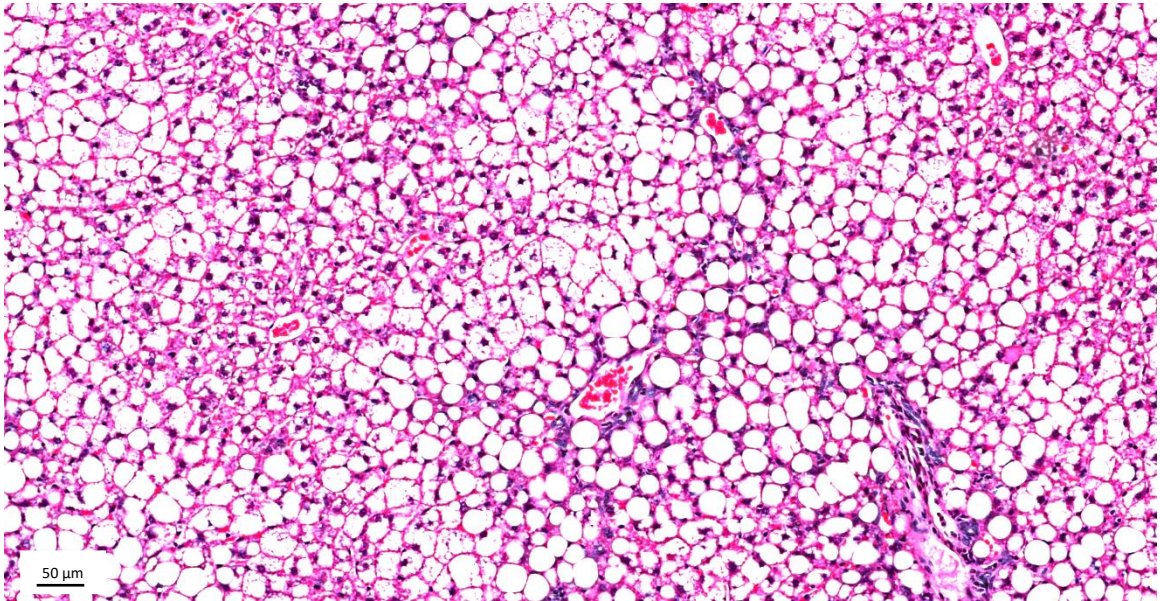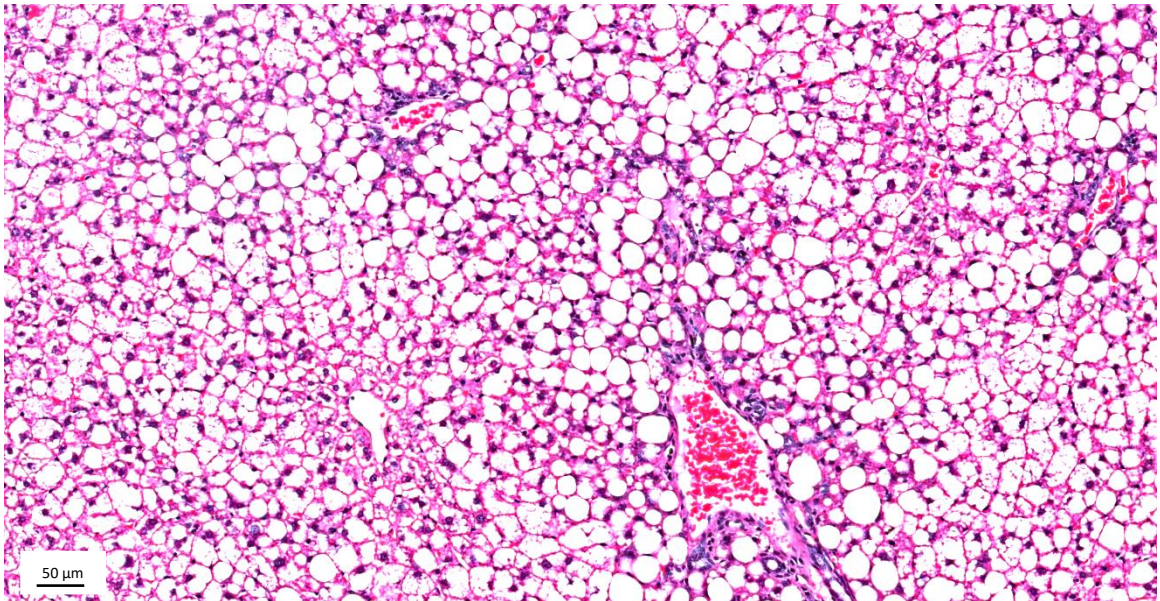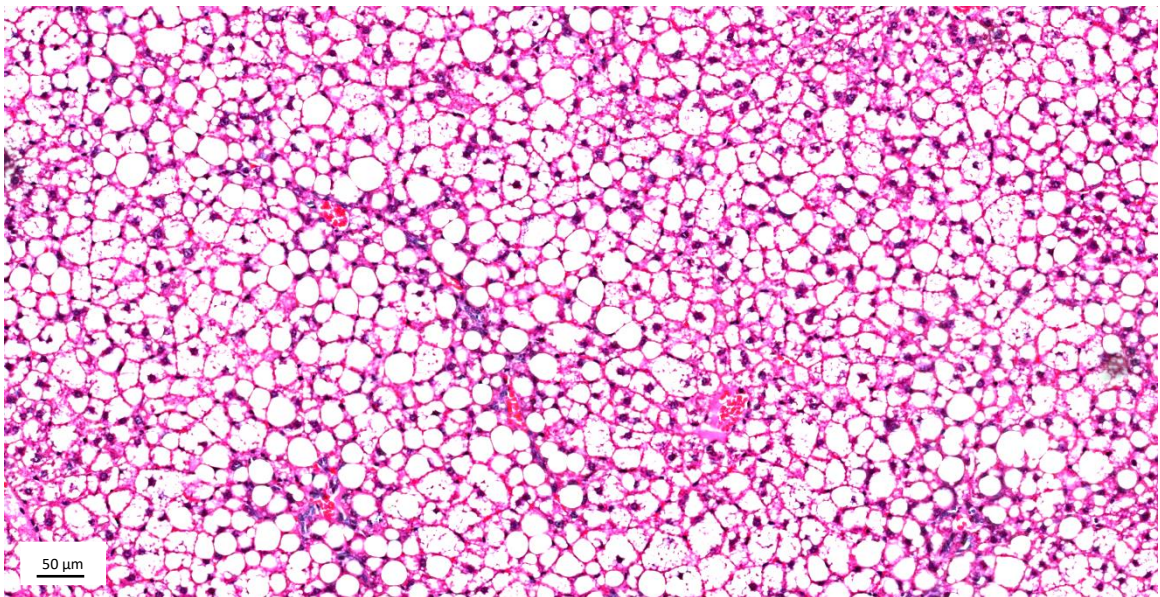



# CDHFD + PBS-9

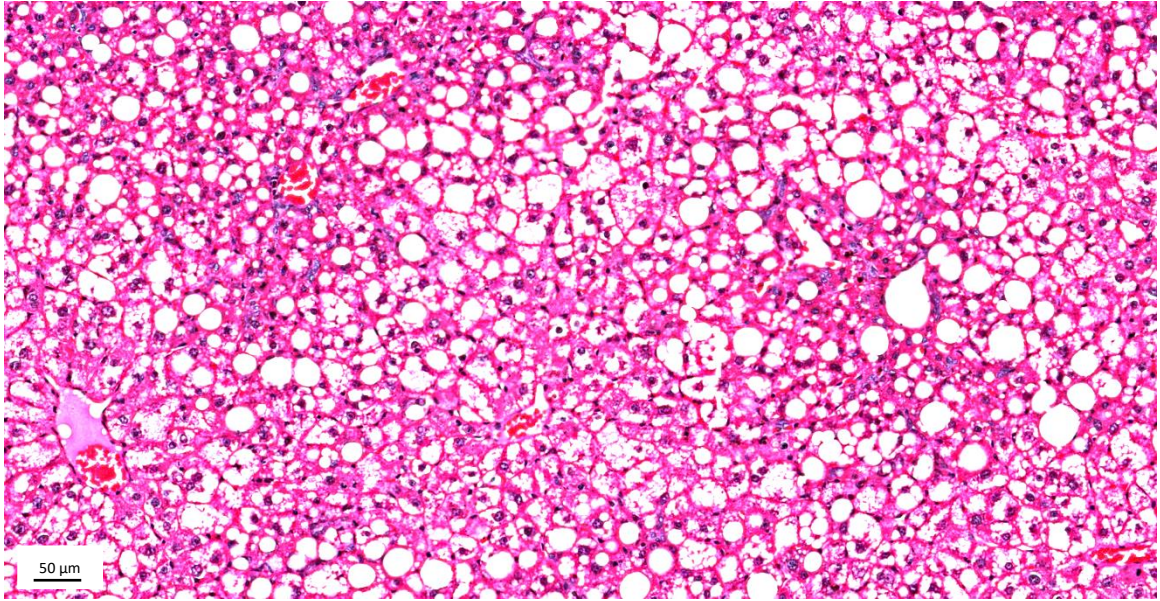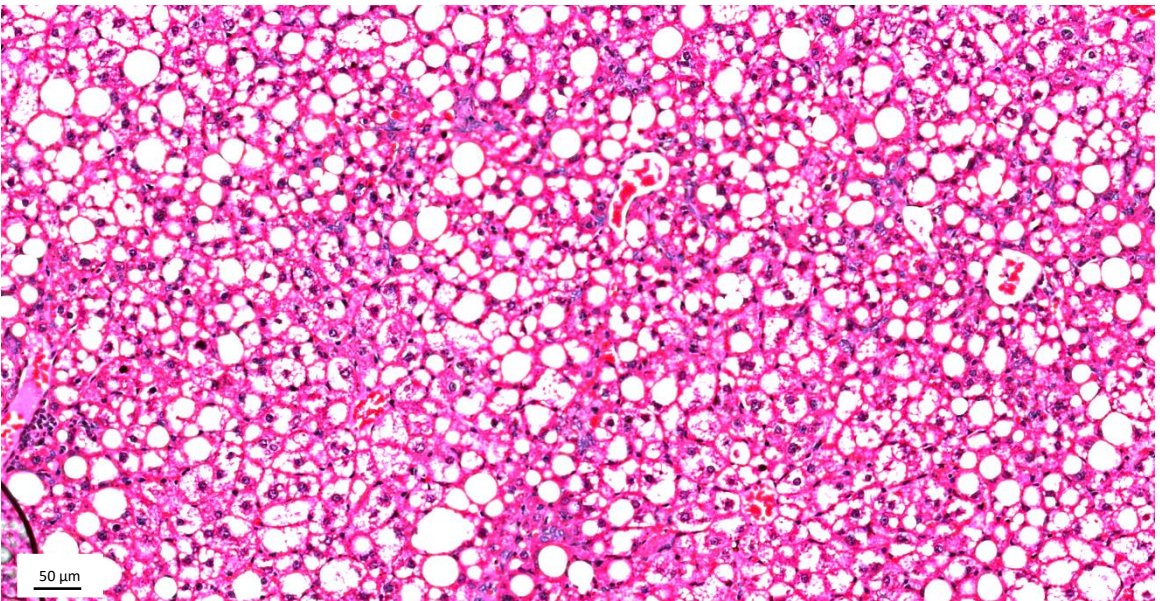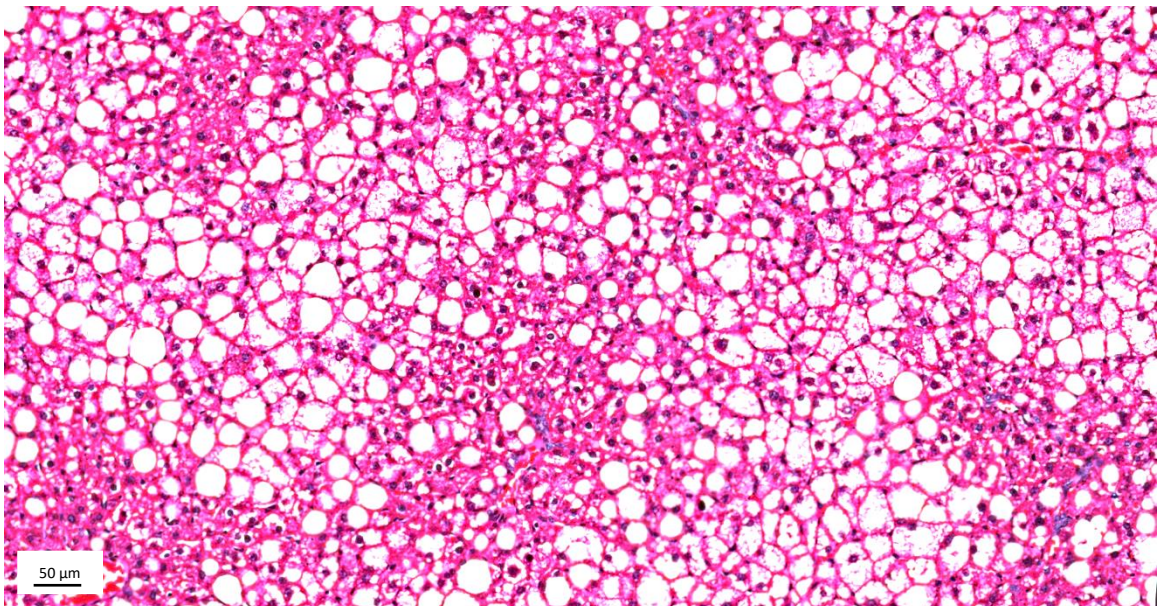

# CDHFD + PBS-10

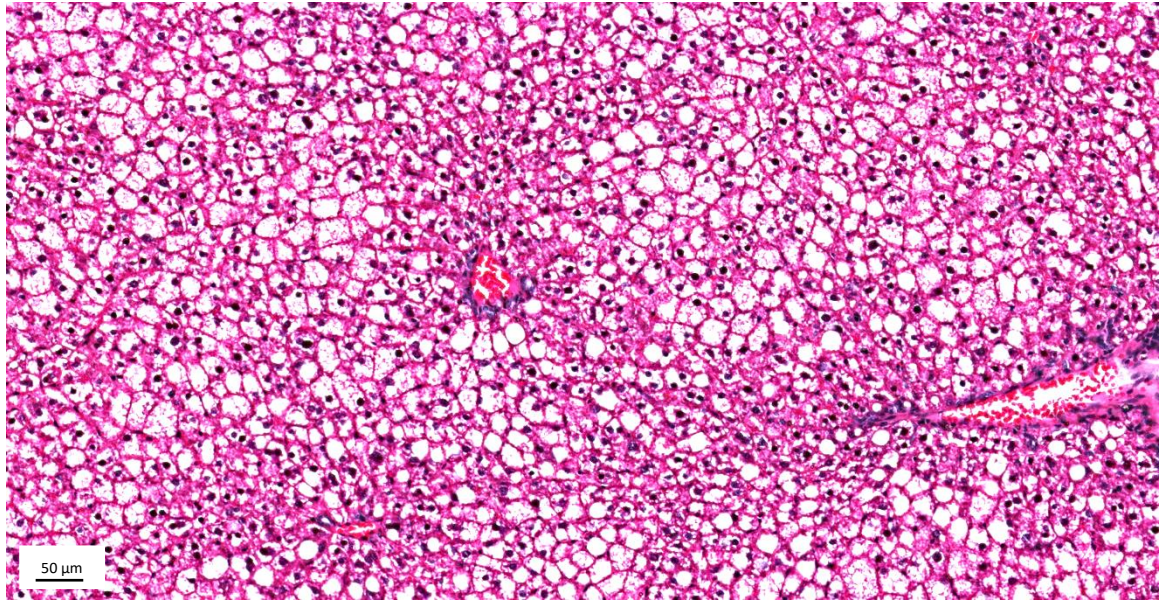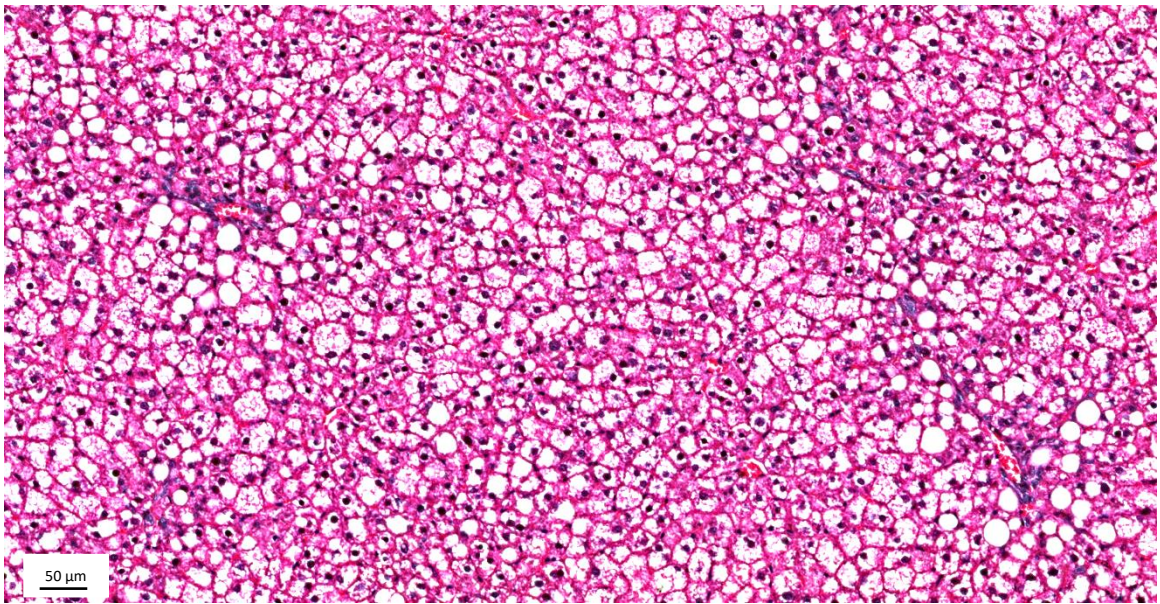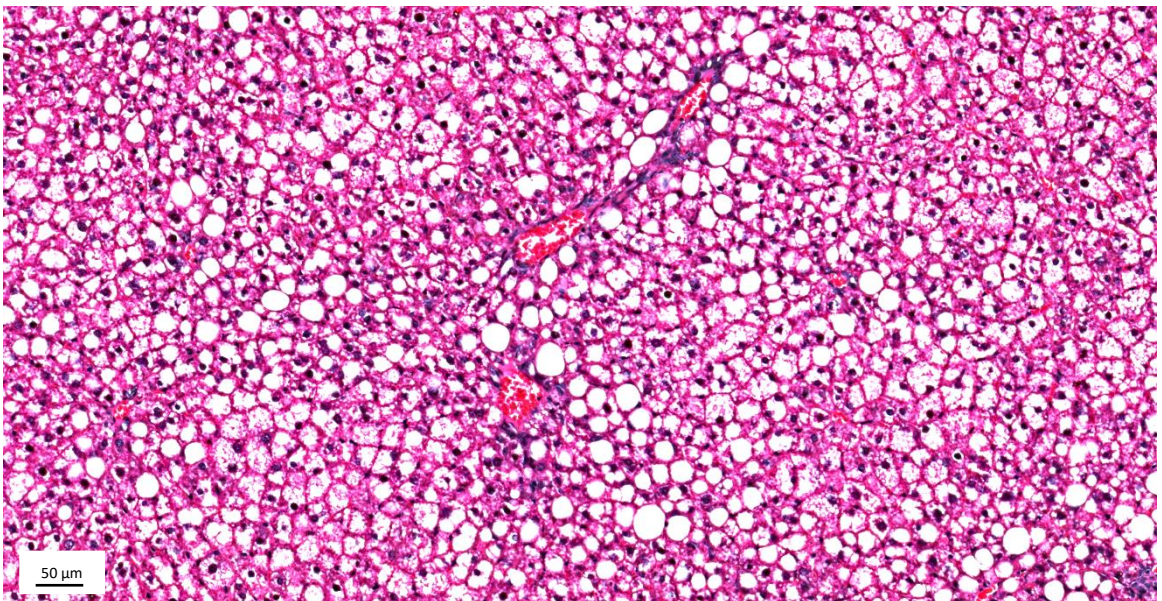

CDHFD + PBS-11

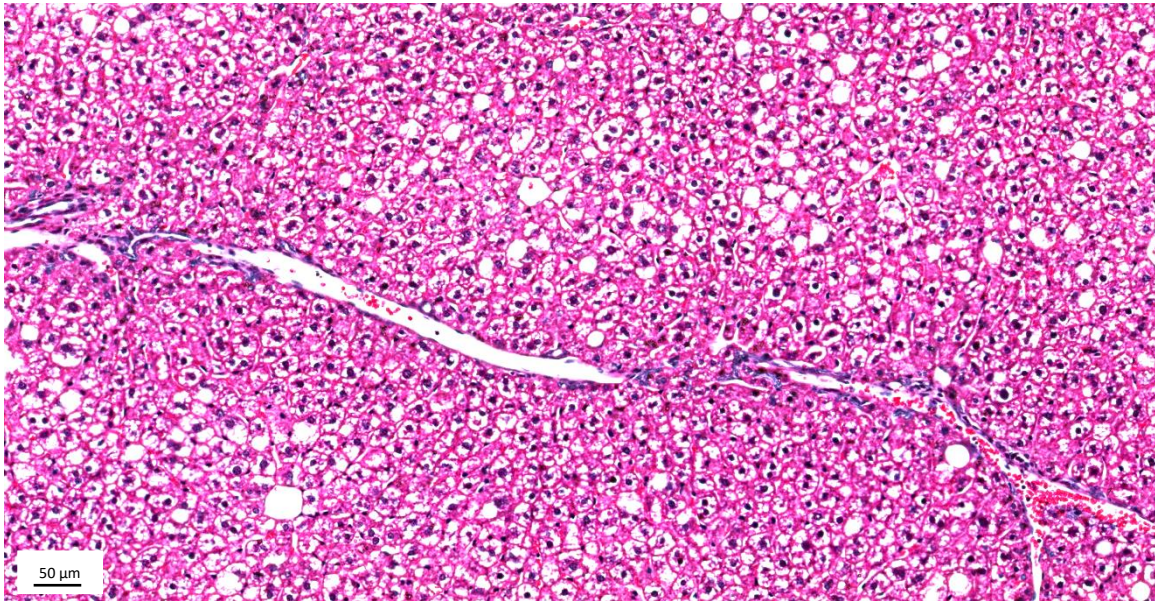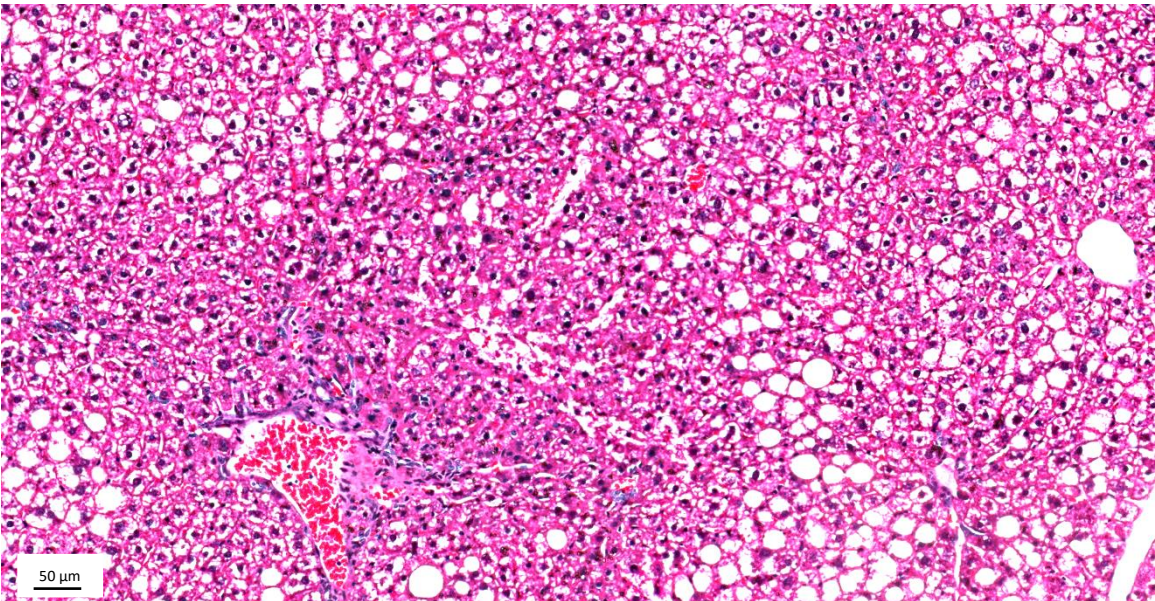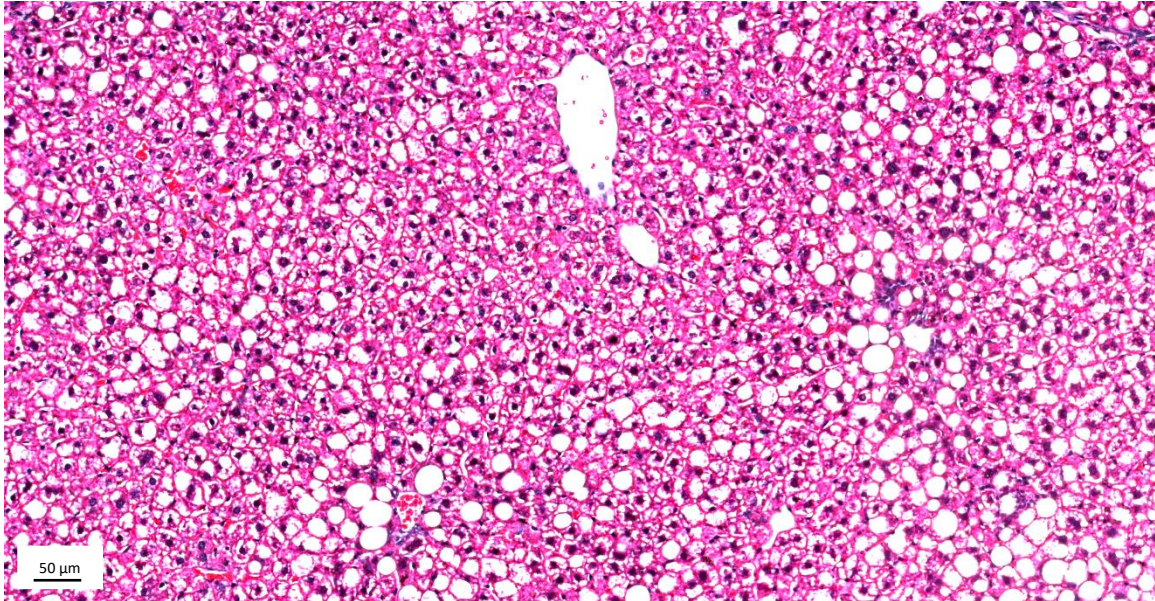

CDHFD + PBS-12

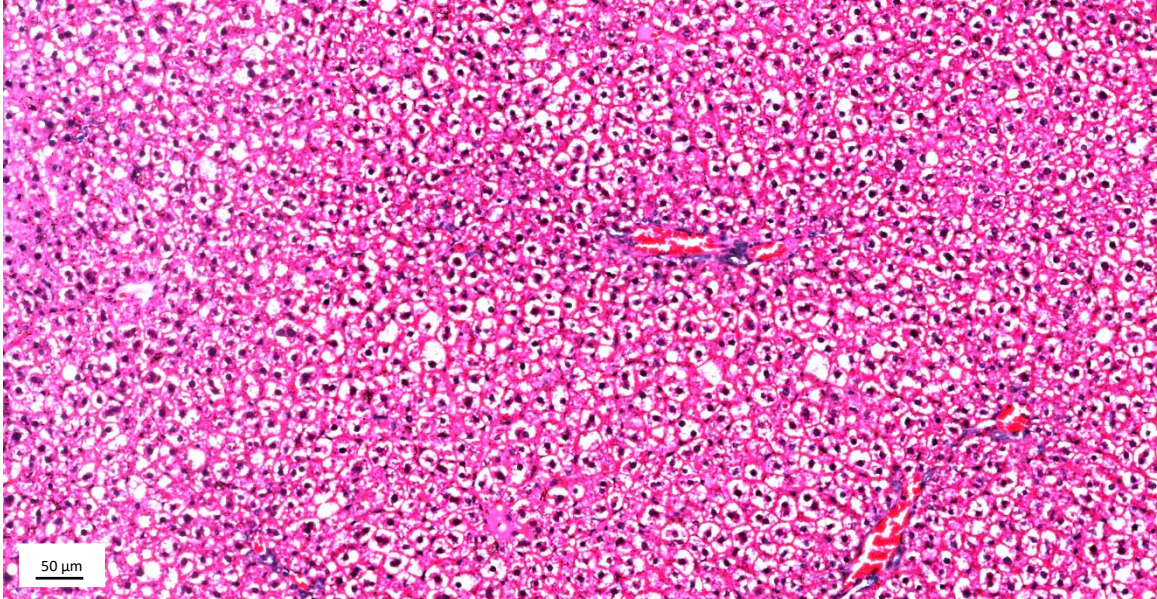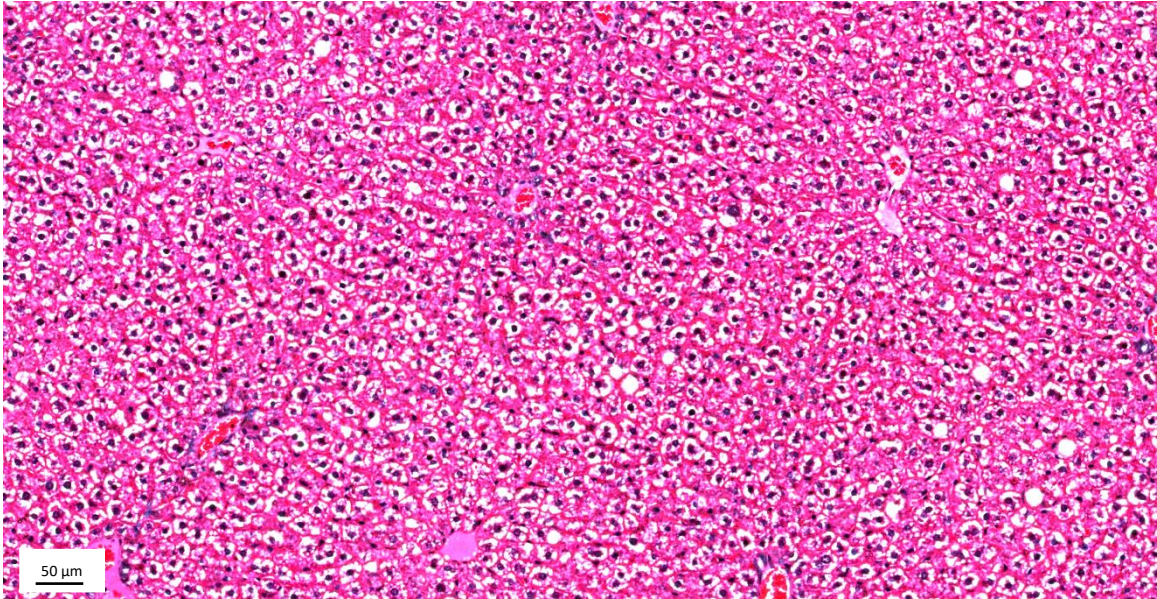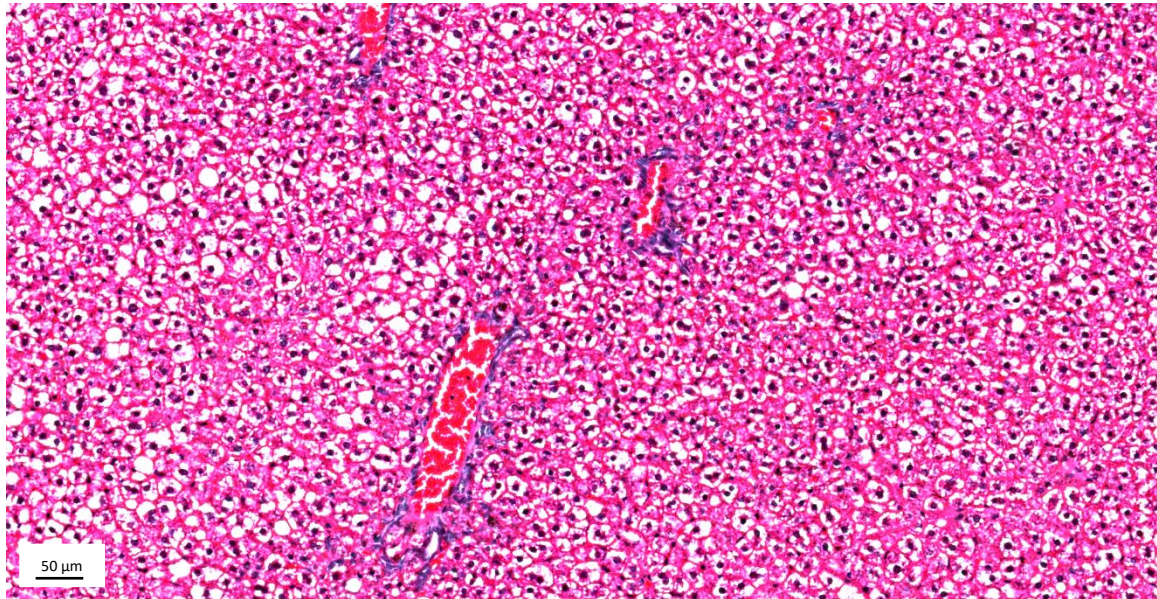

CDHFD + PBS-13

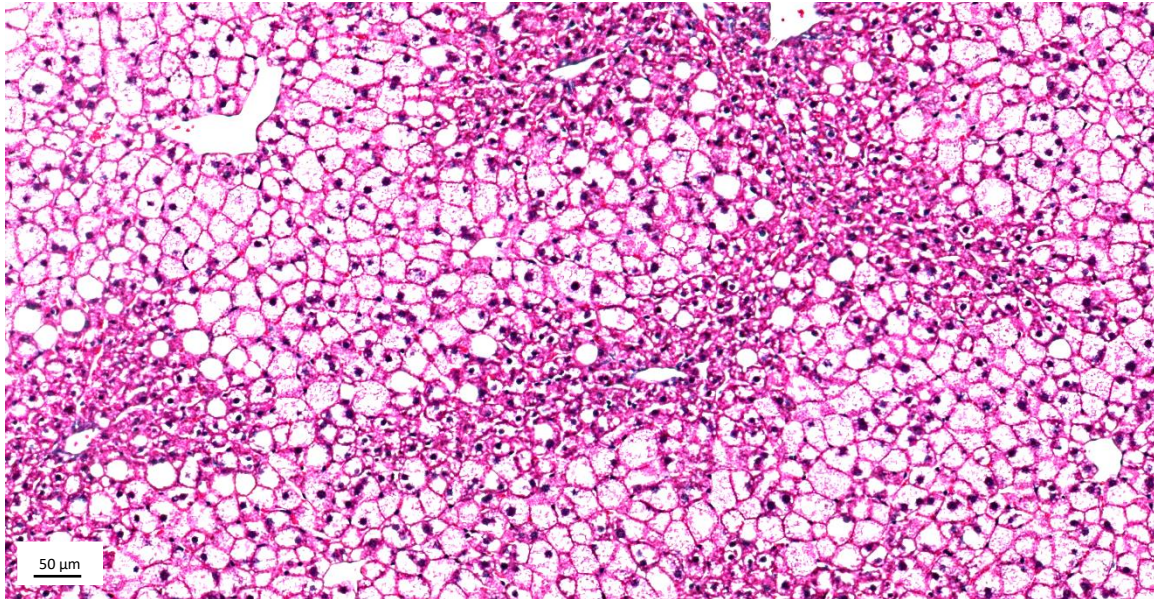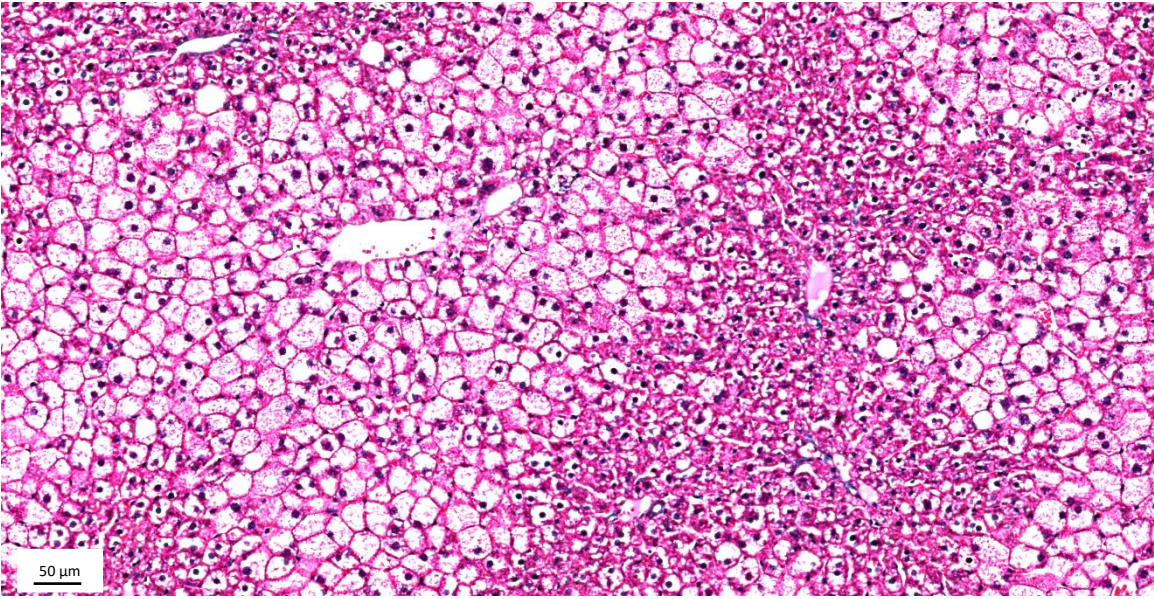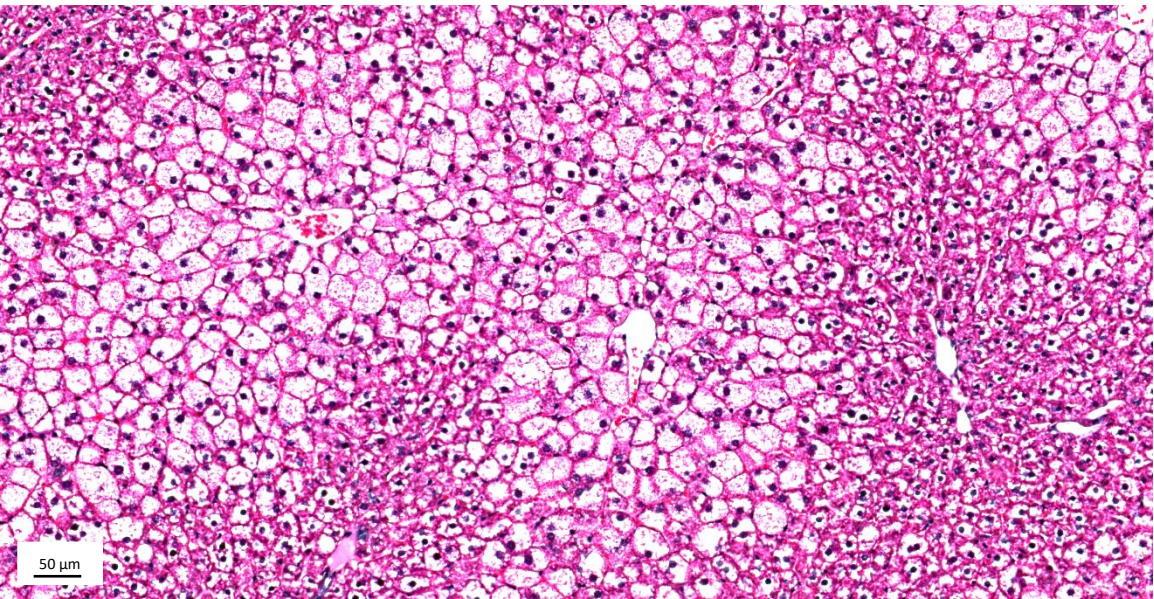

CDHFD + PBS-14

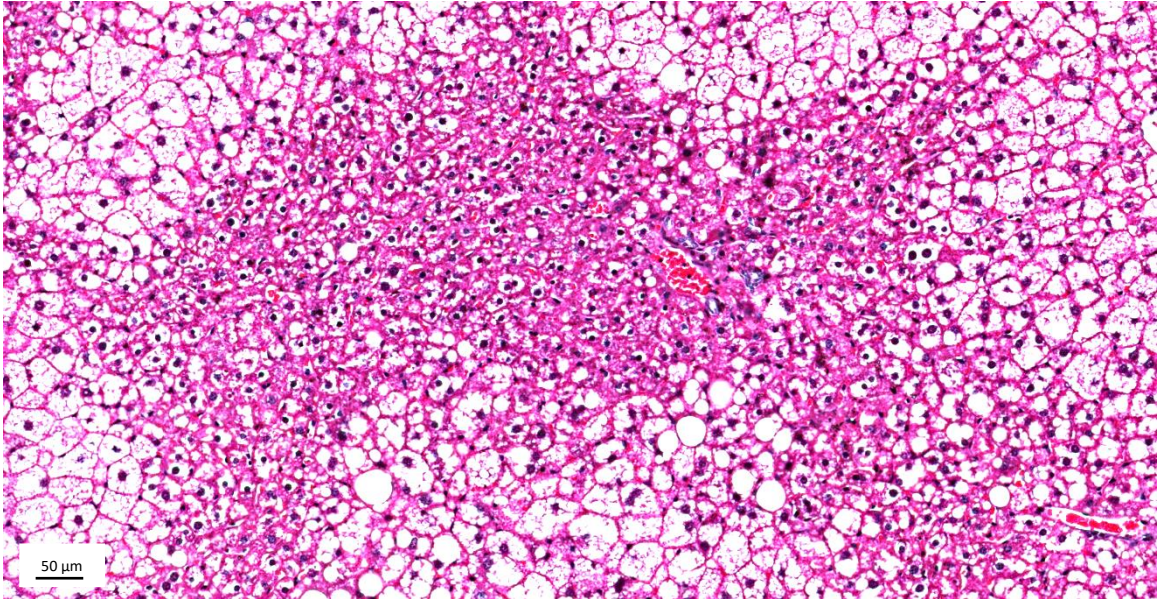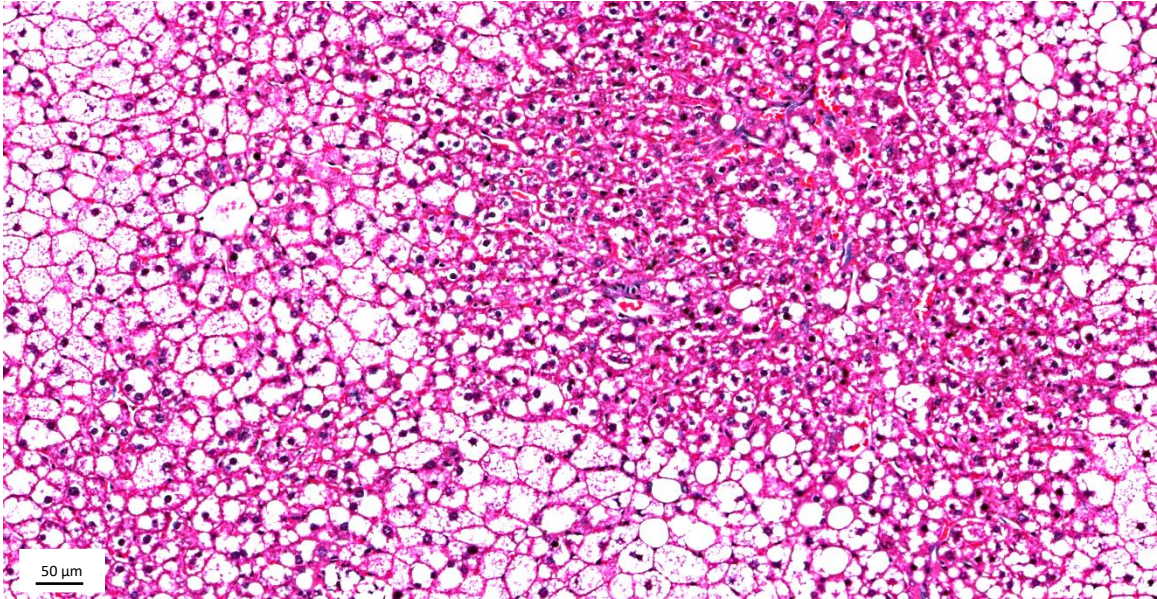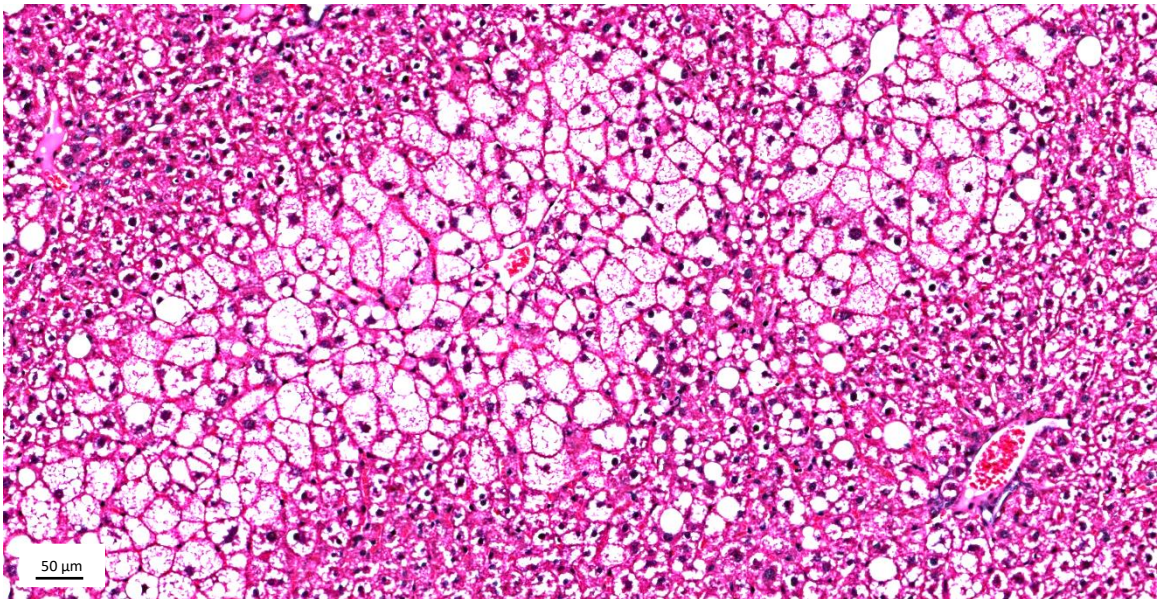

## **H&E Staining**

**CDHFD + *E. coli* group**

(11 mice were included)

CDHFD + *E. coli* - 1

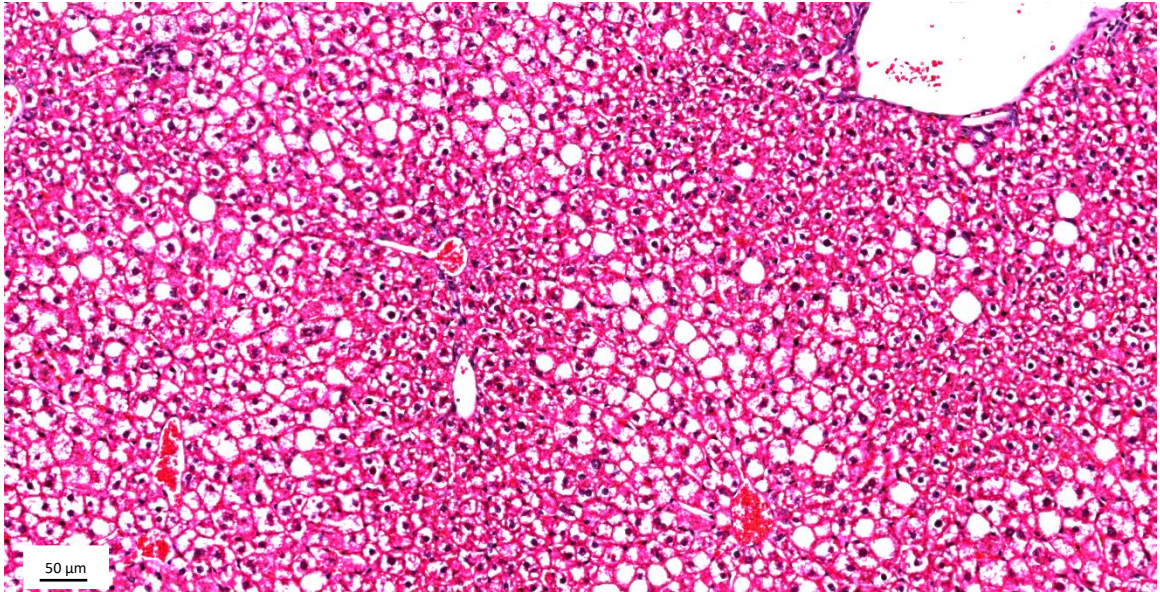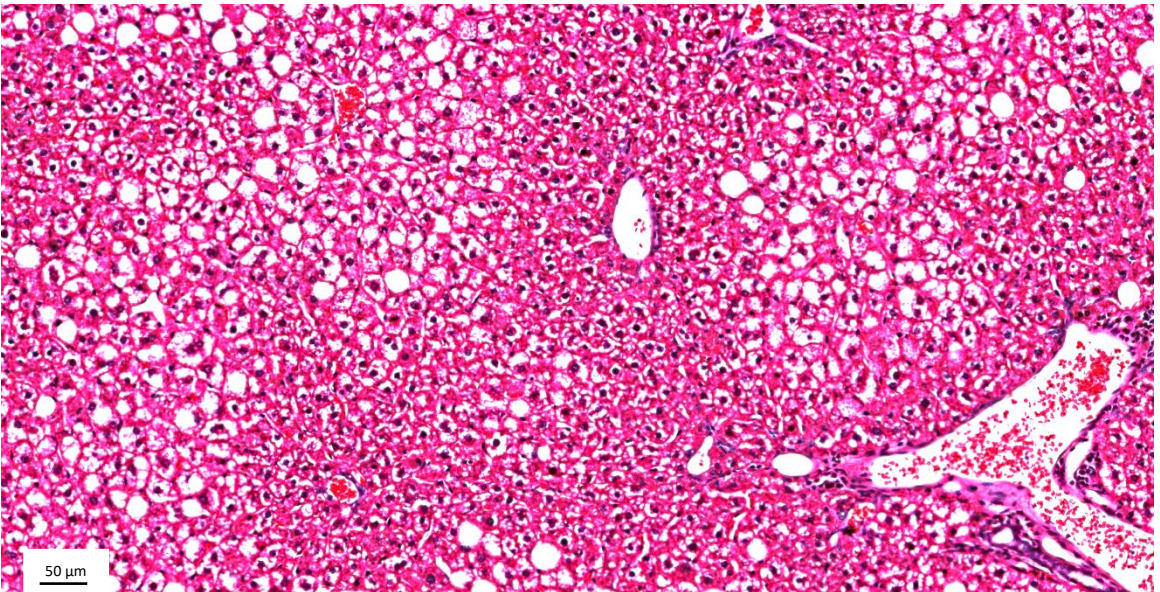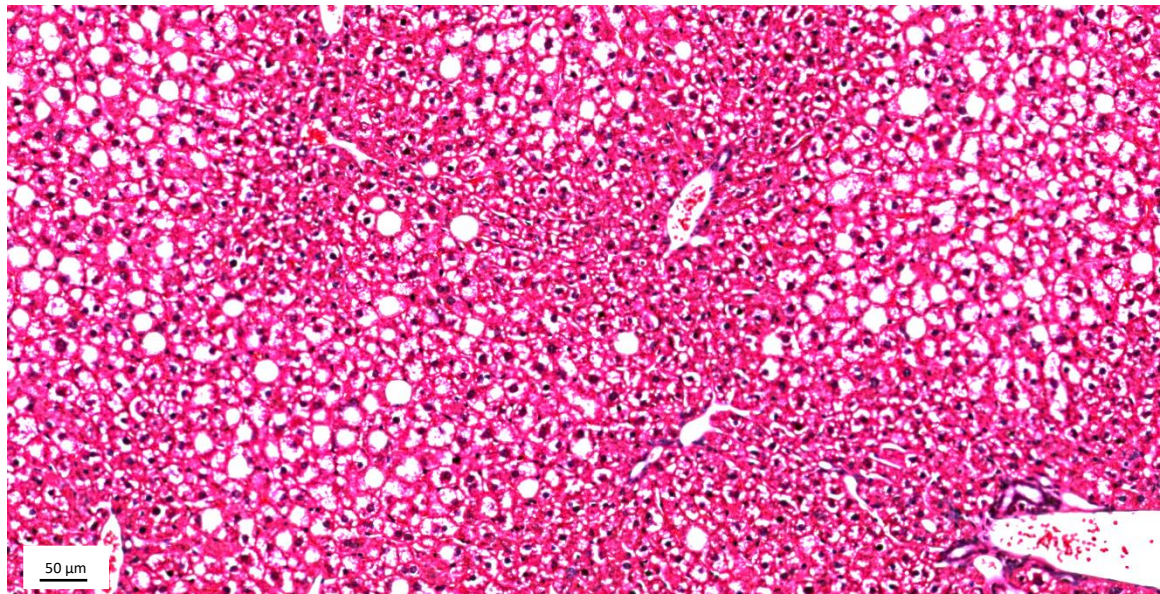



CDHFD + *E. coli* - 2

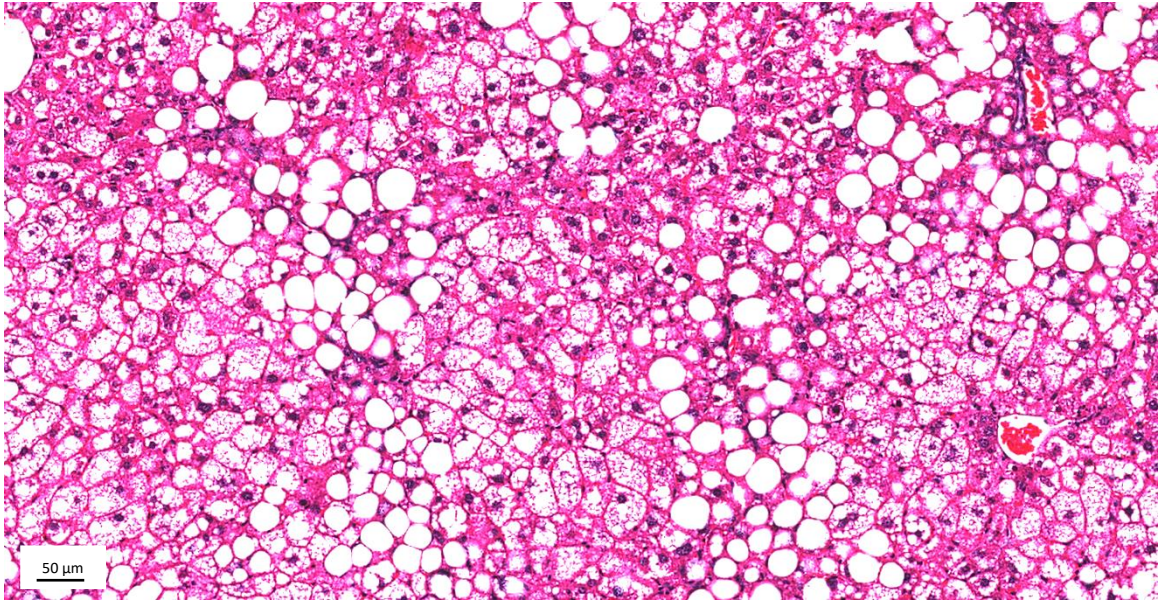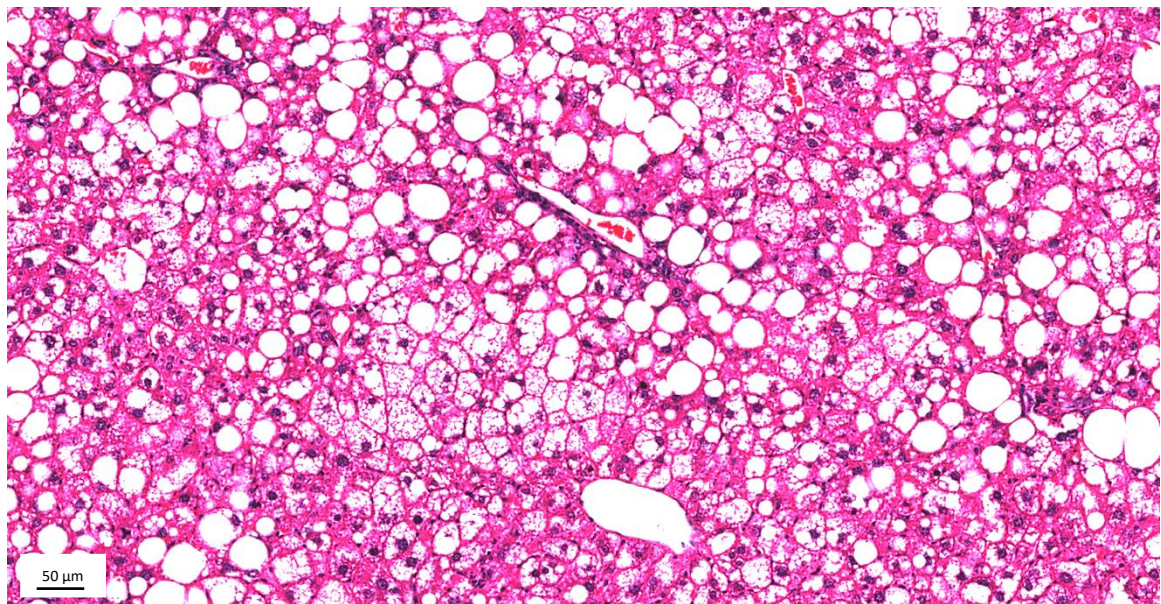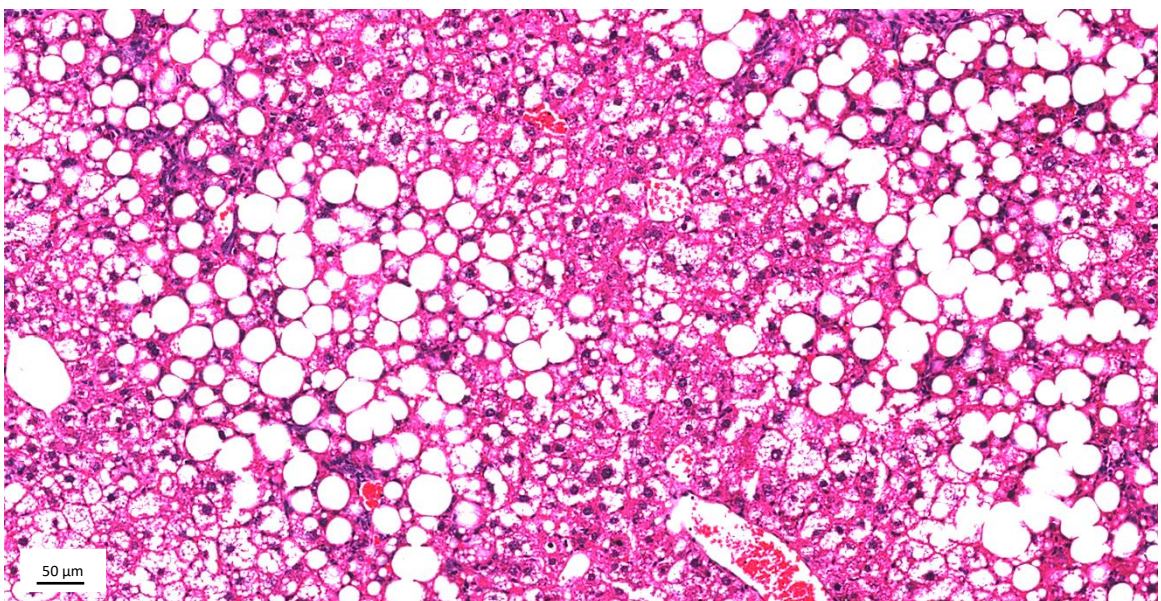

CDHFD + *E. coli* - 3

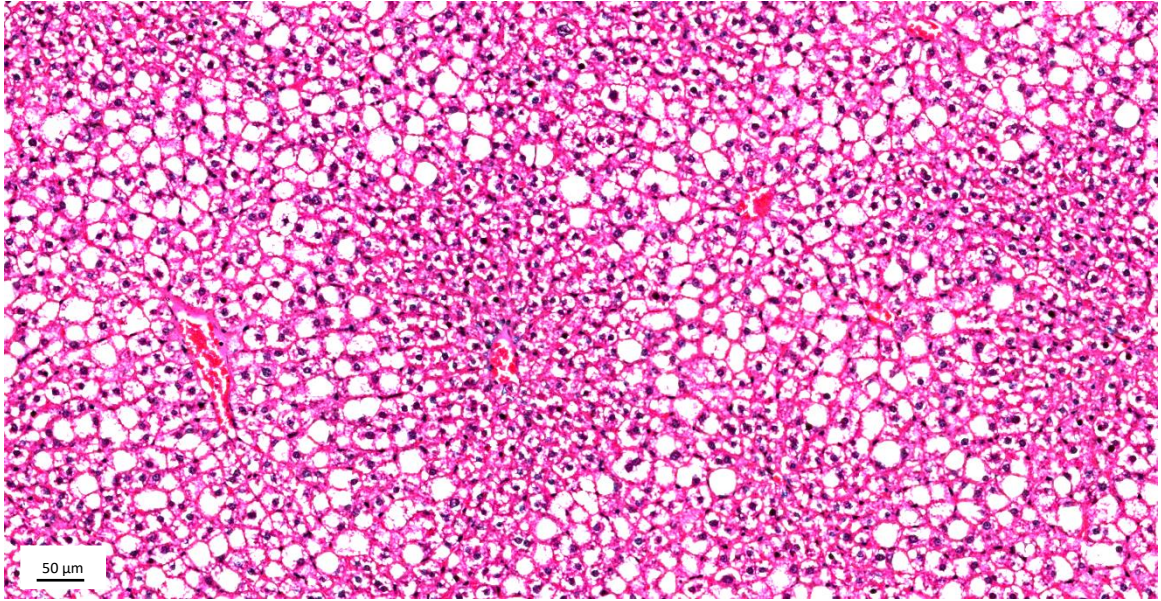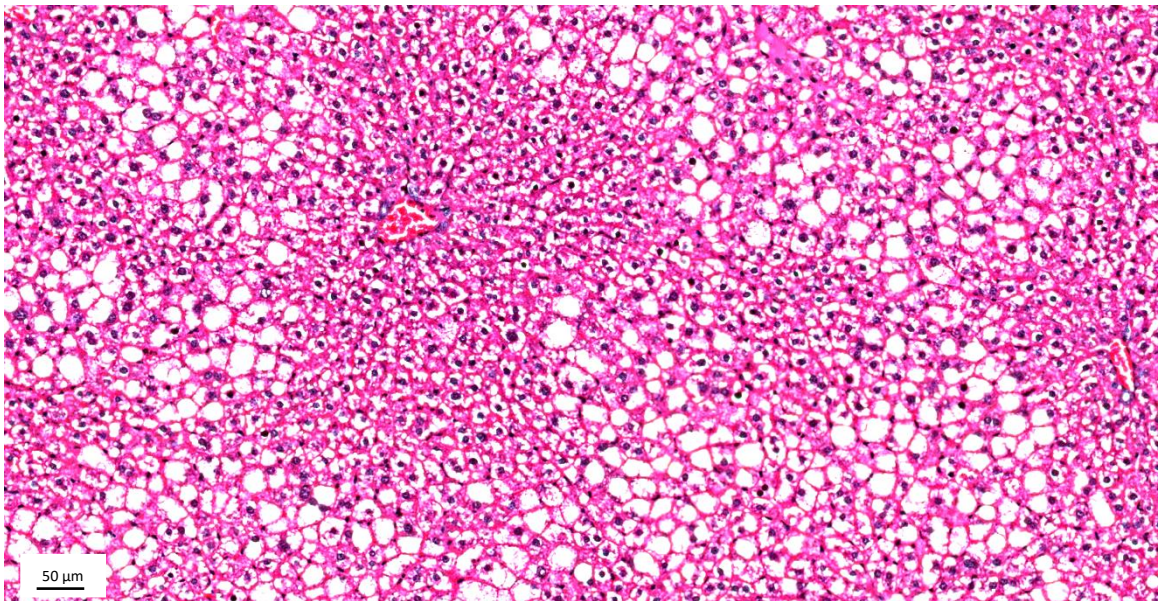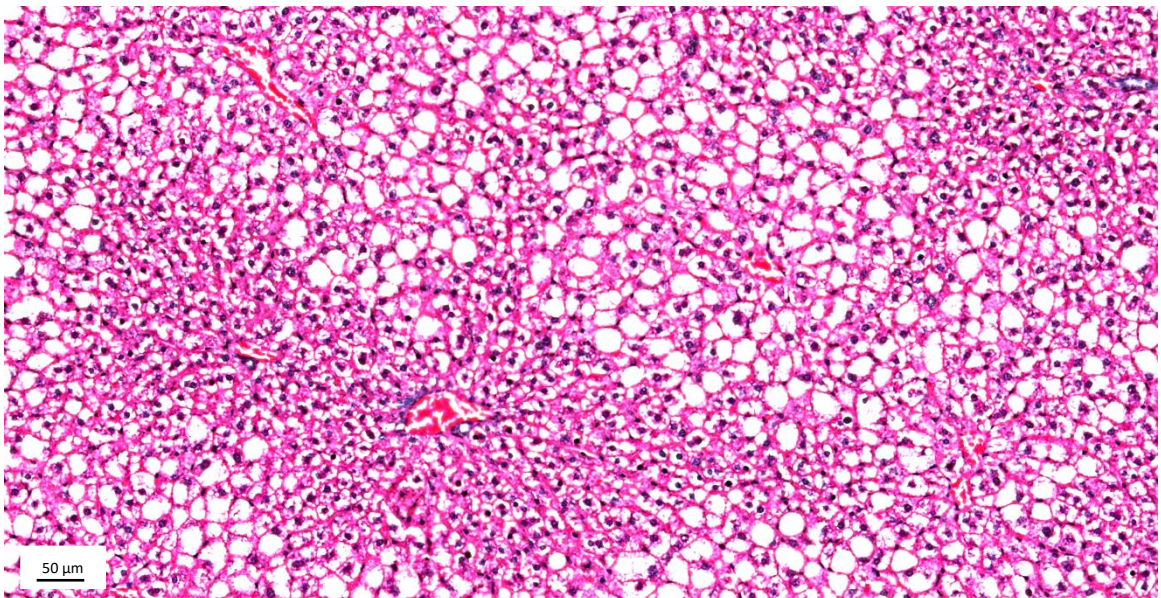

CDHFD + *E. coli* - 4

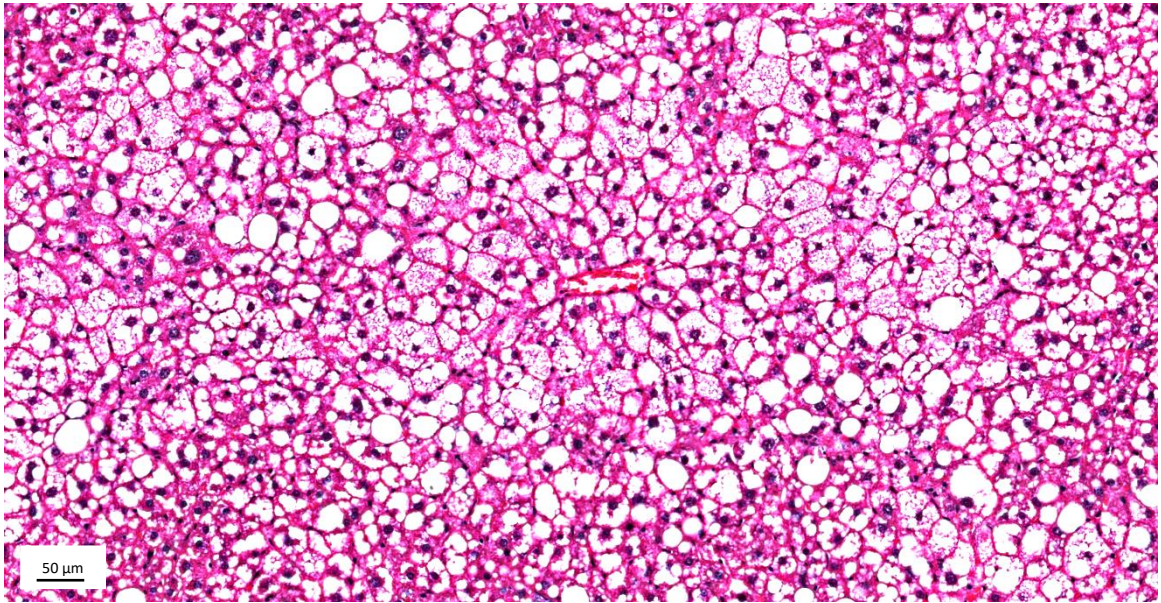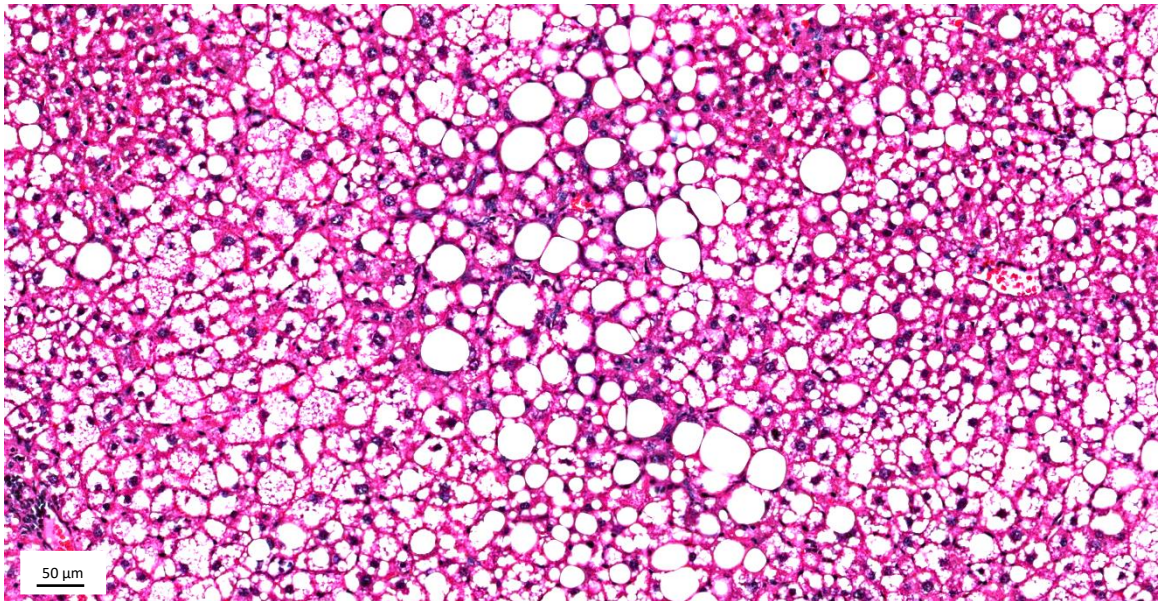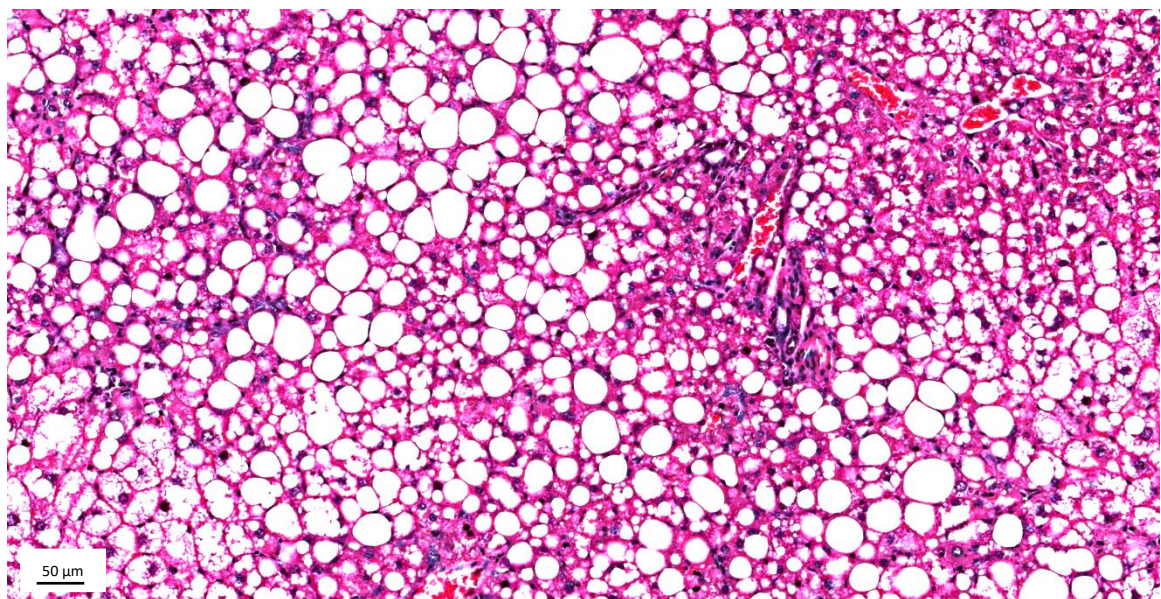

CDHFD + *E. coli* - 5

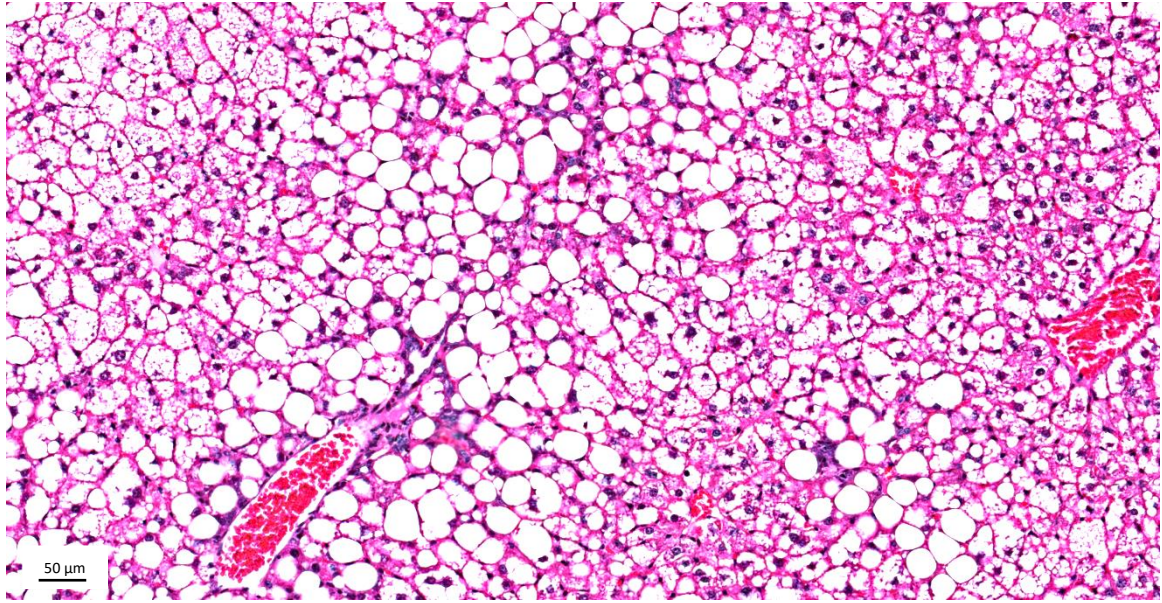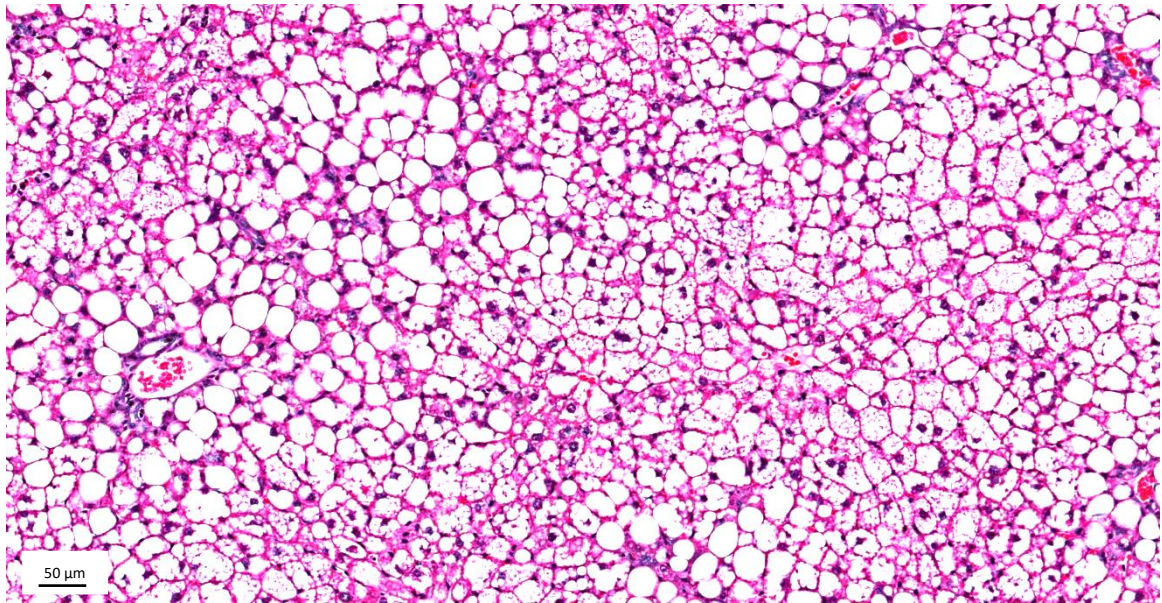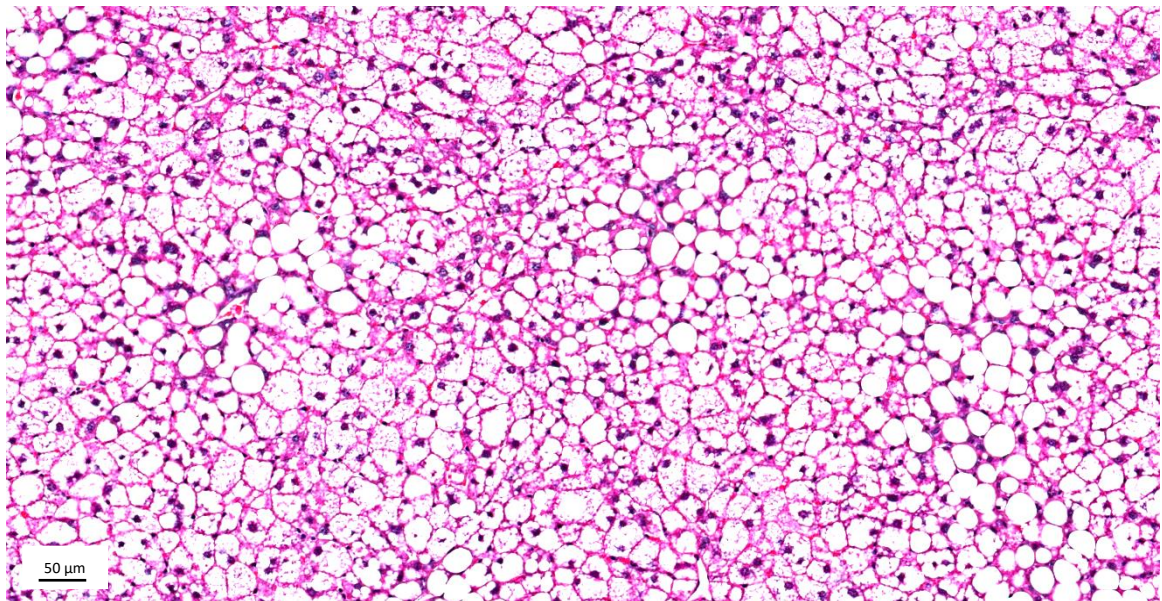

CDHFD + *E. coli* - 6

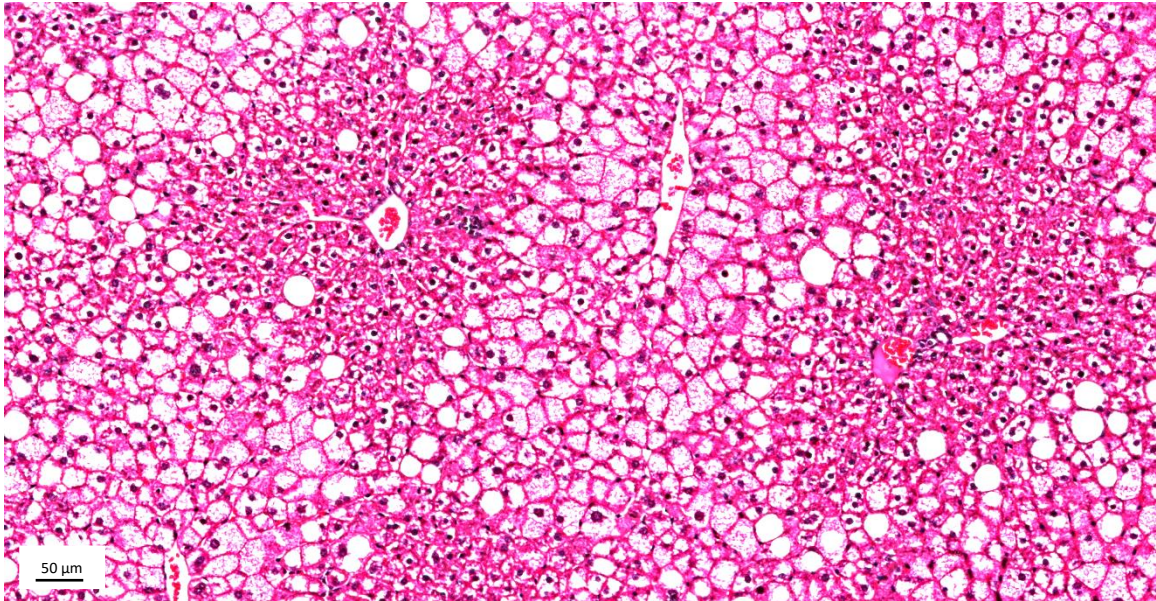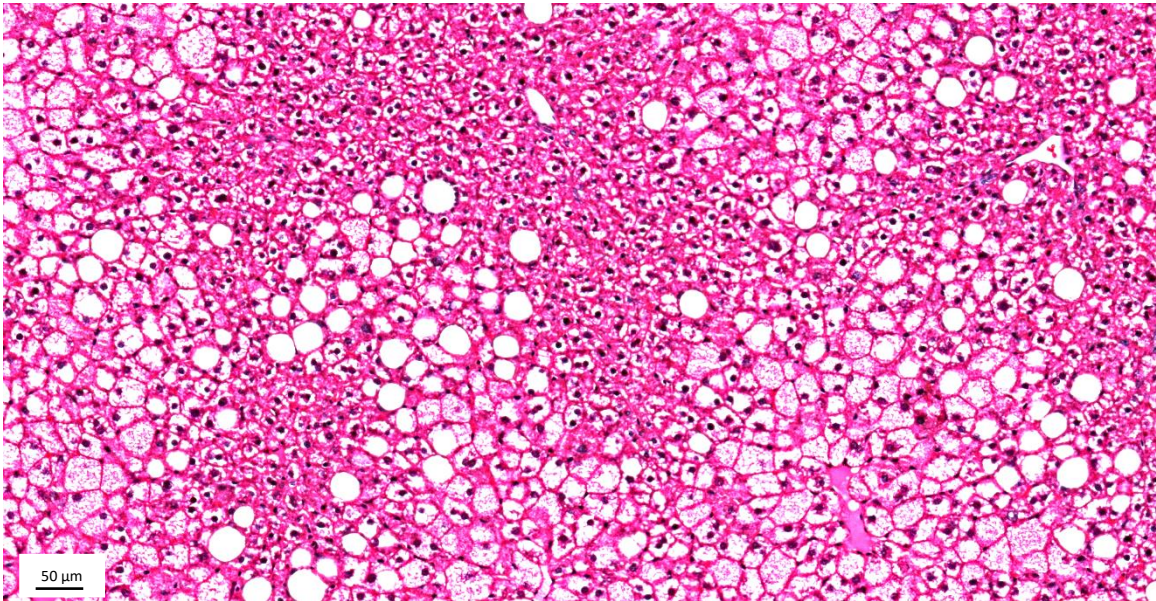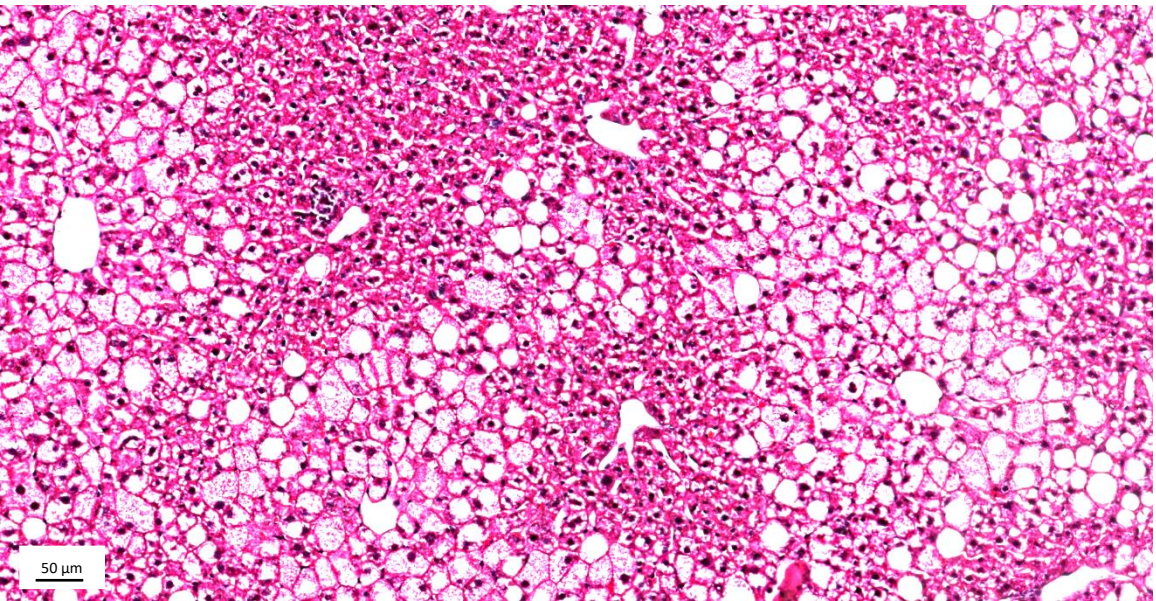

CDHFD + *E. coli* - 7

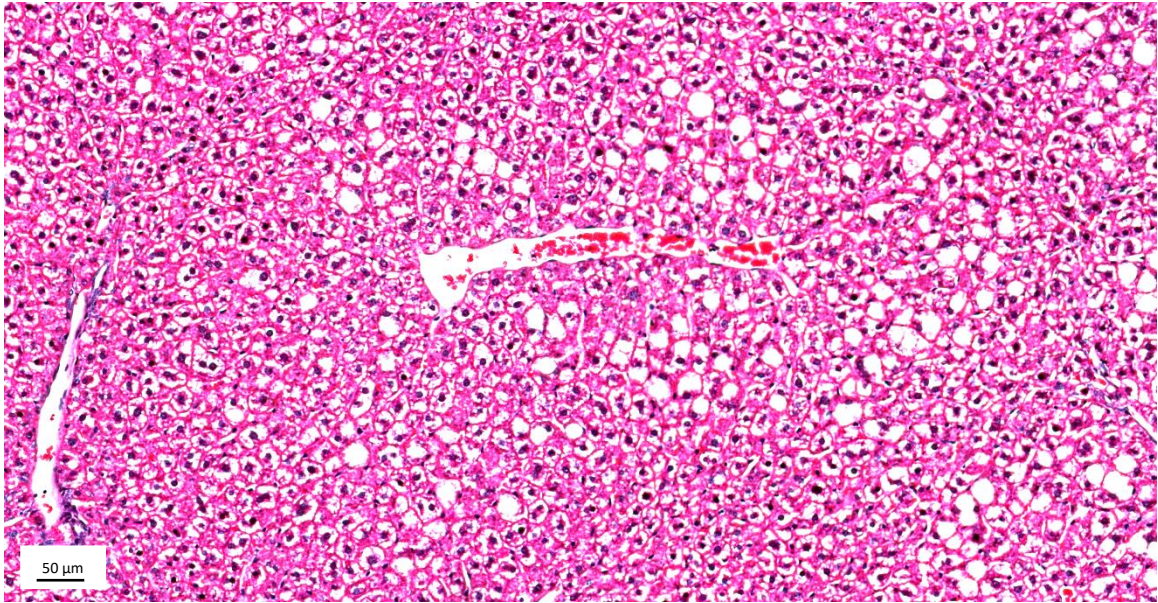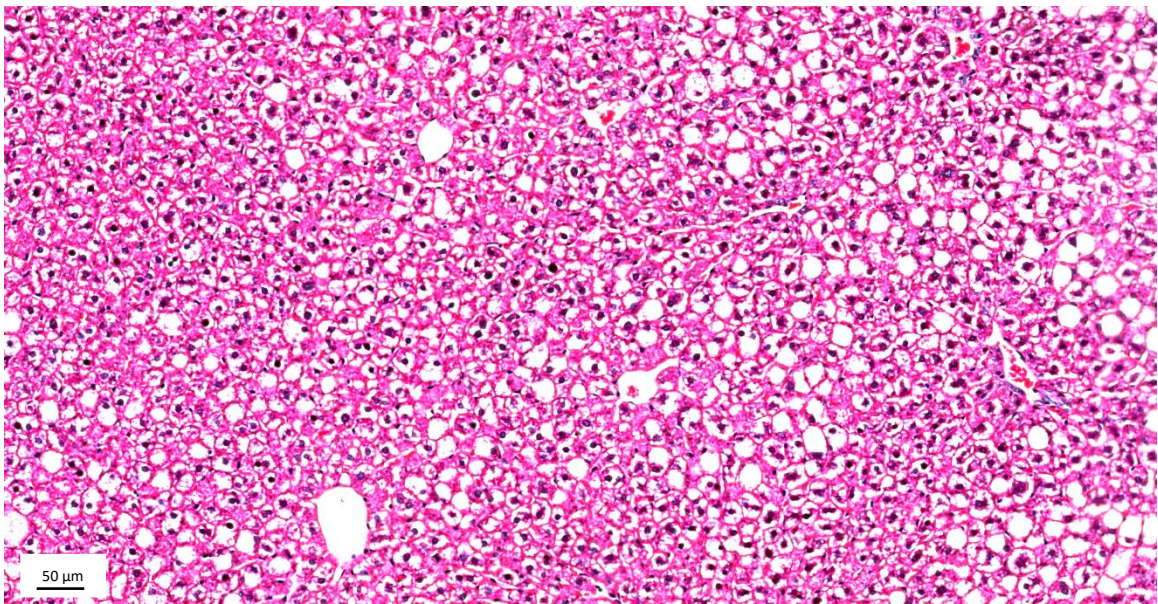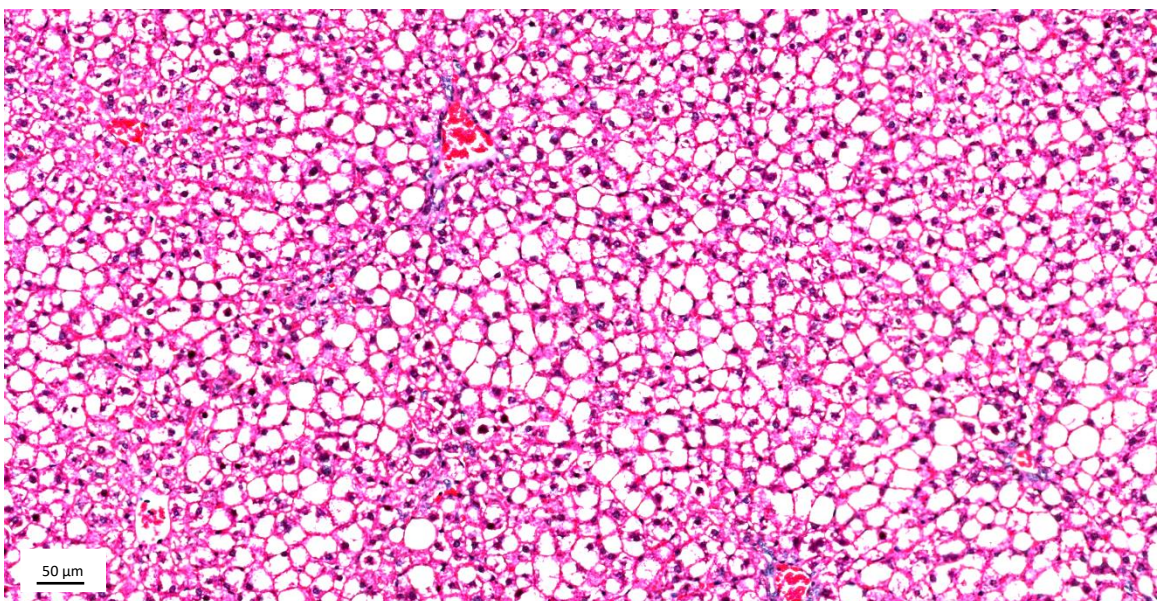

CDHFD + *E. coli* - 8

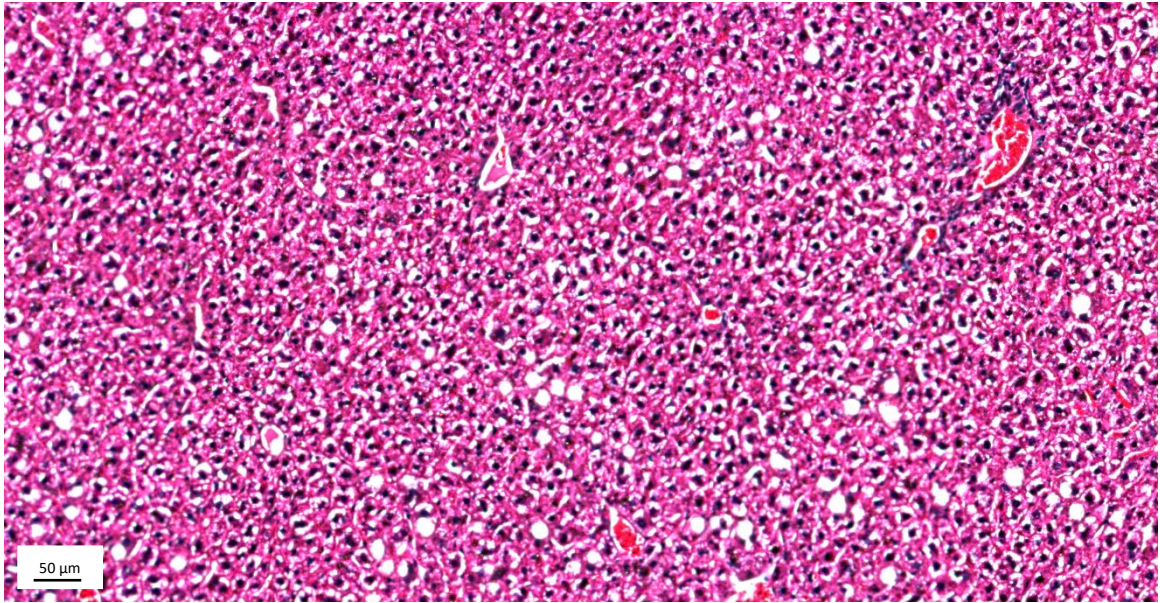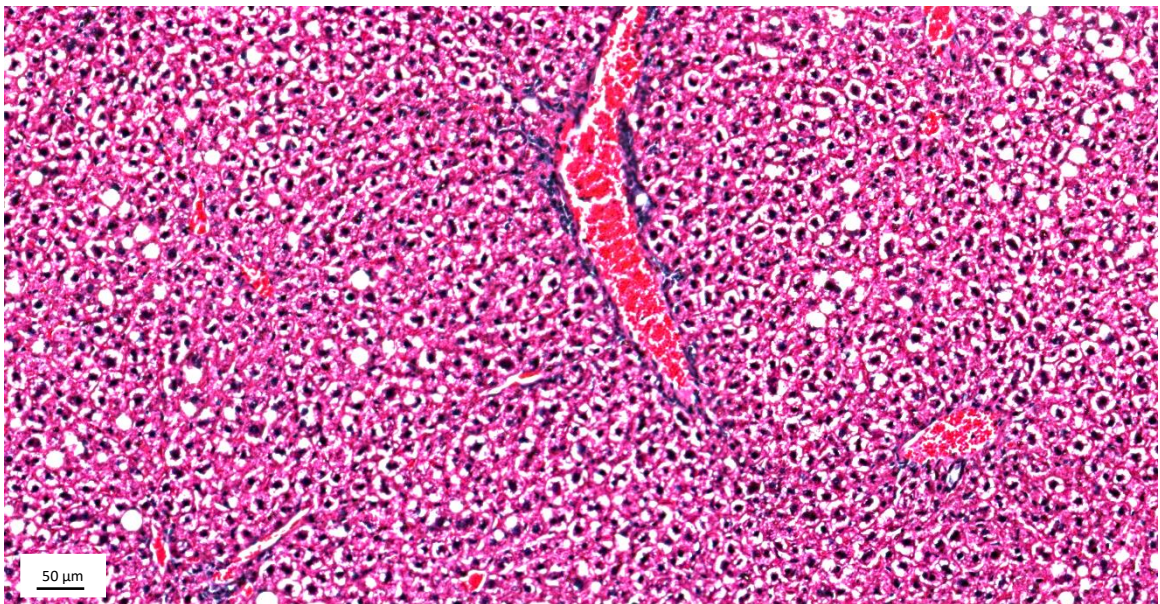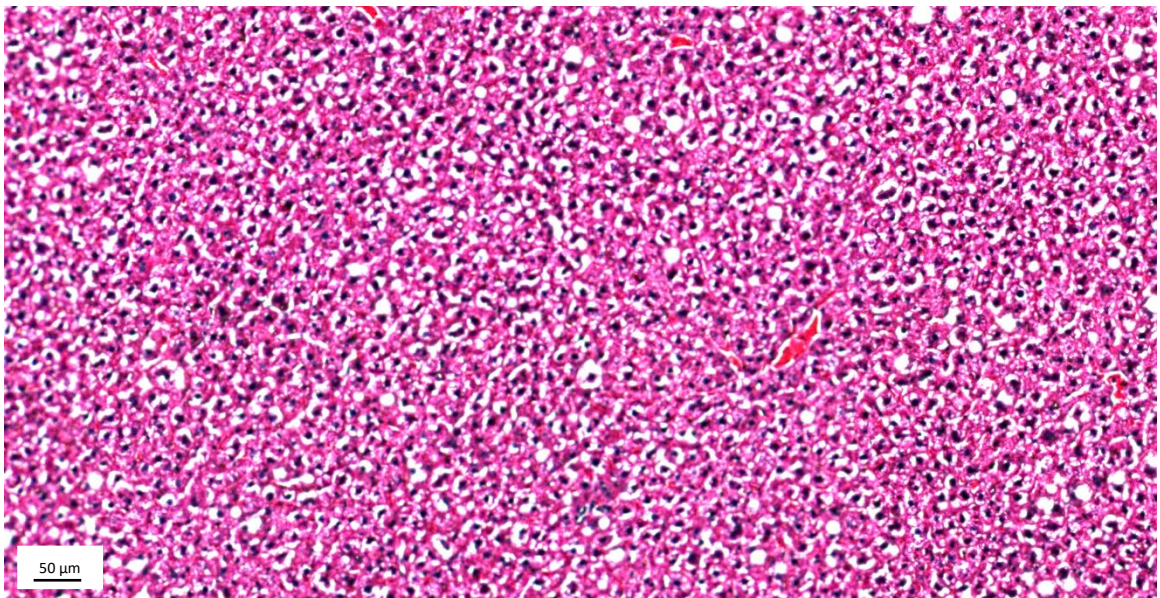

CDHFD + *E. coli* - 9

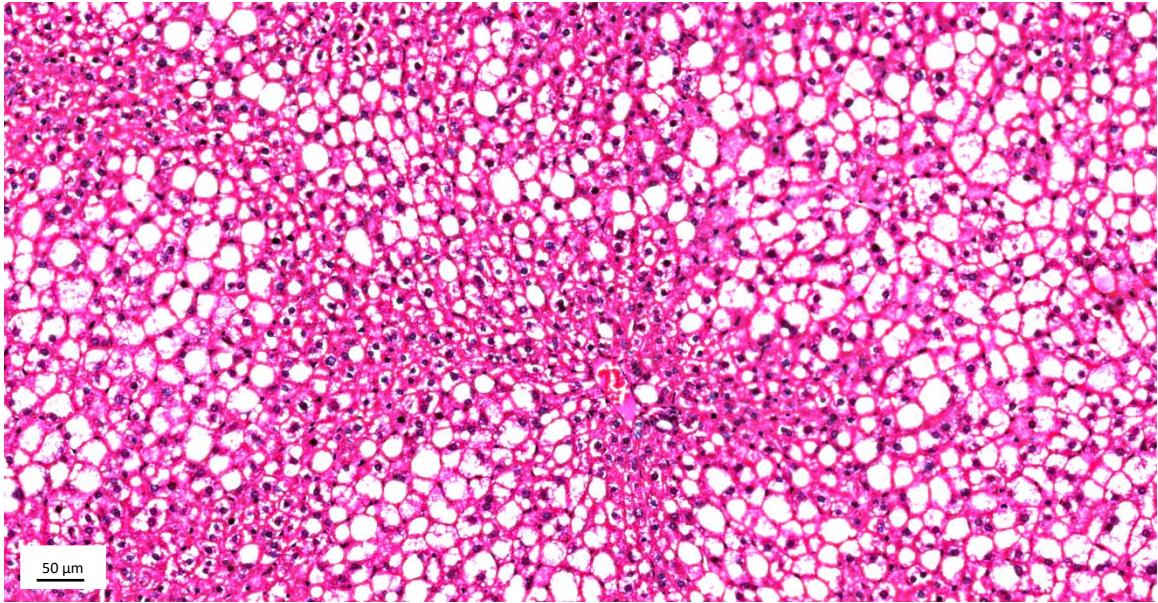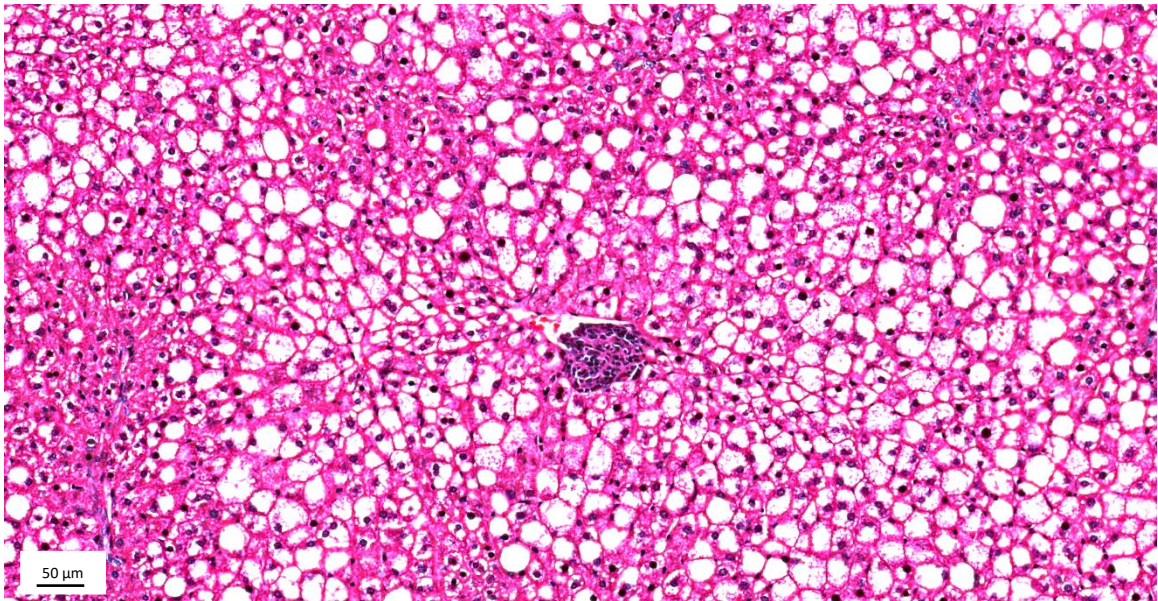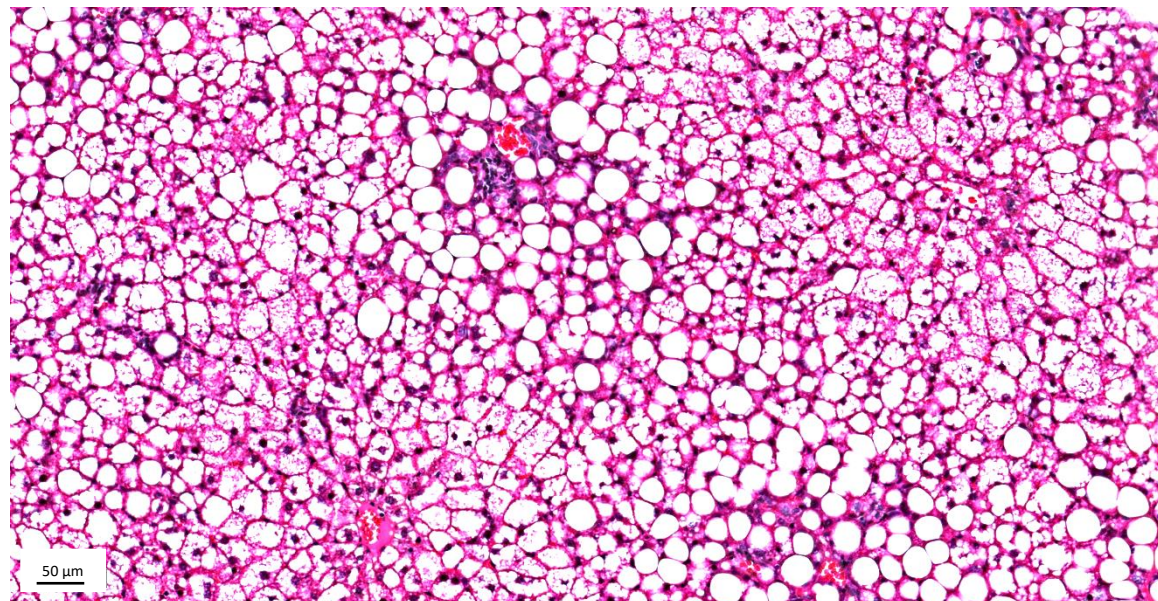



CDHFD + *E. coli* - 10

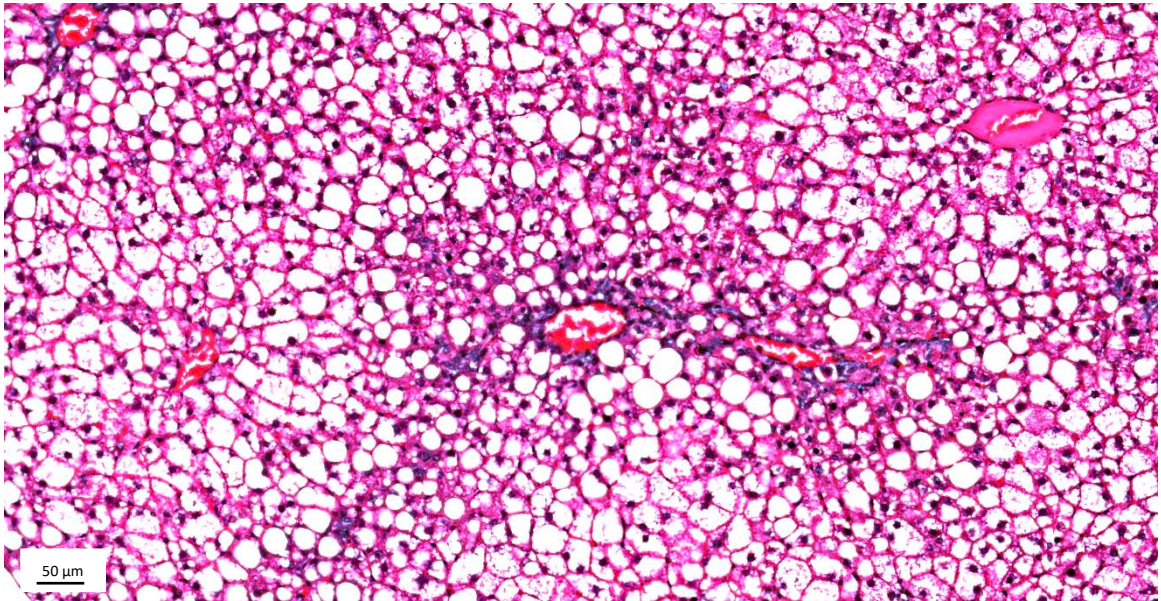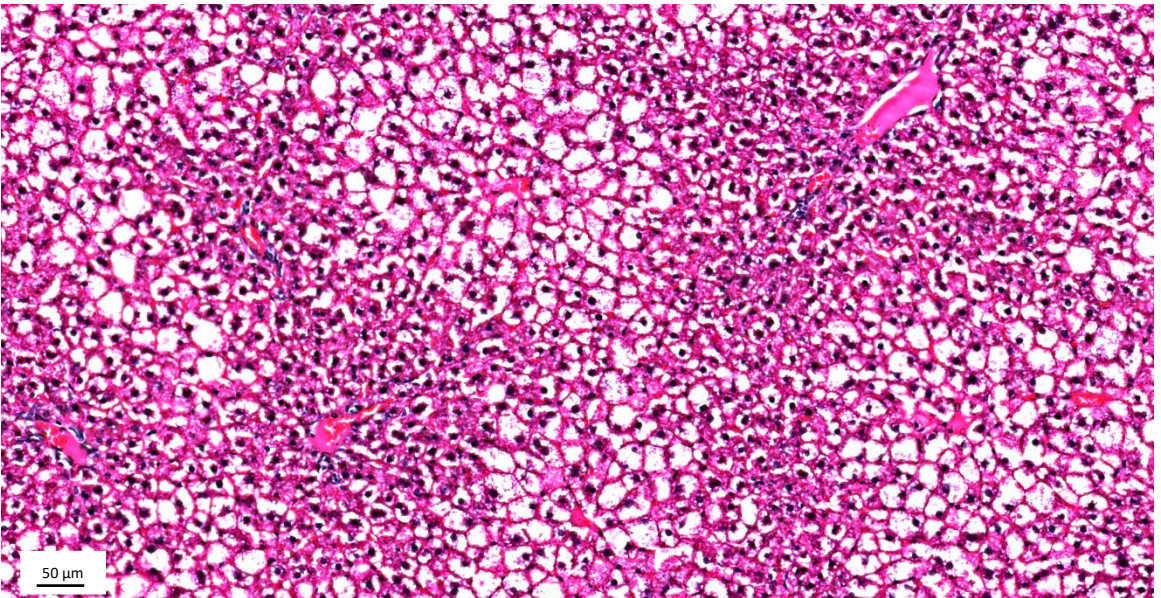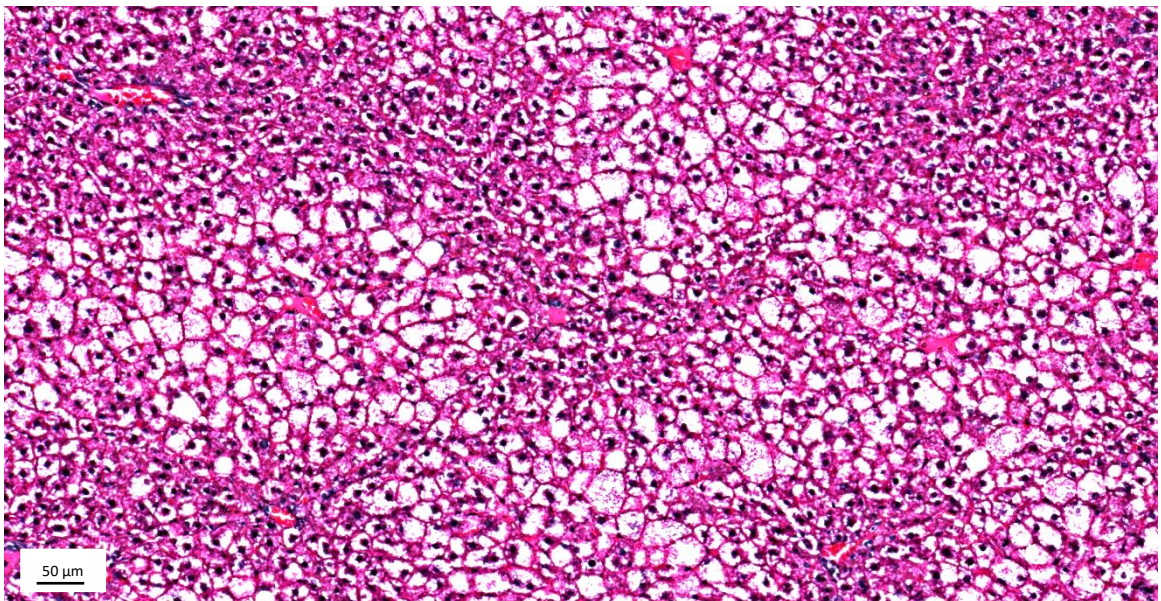

CDHFD + *E. coli* - 11

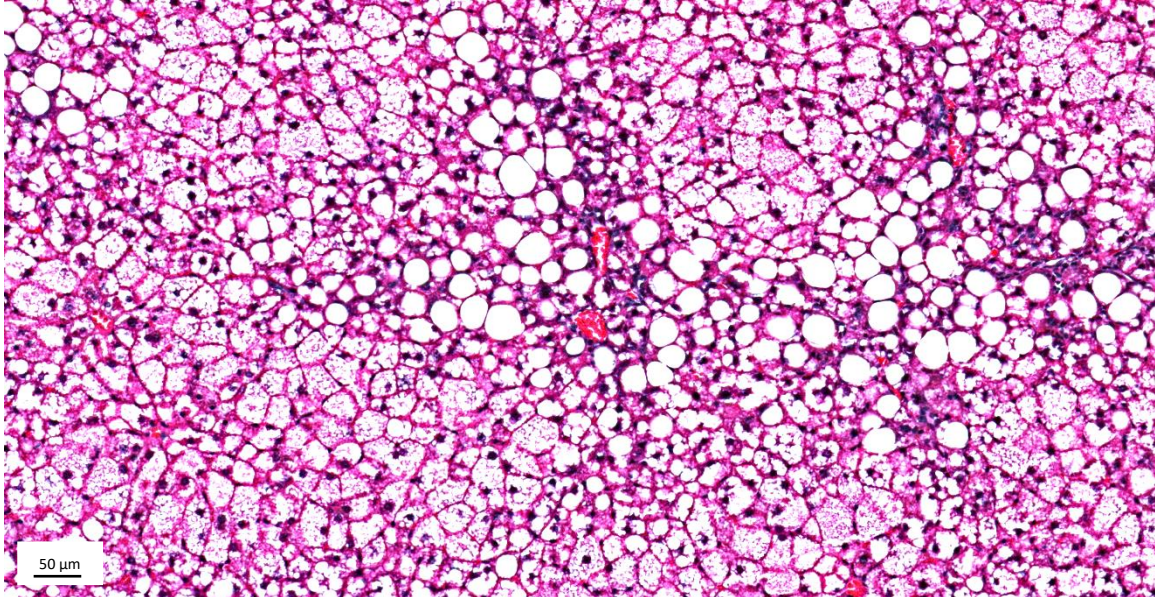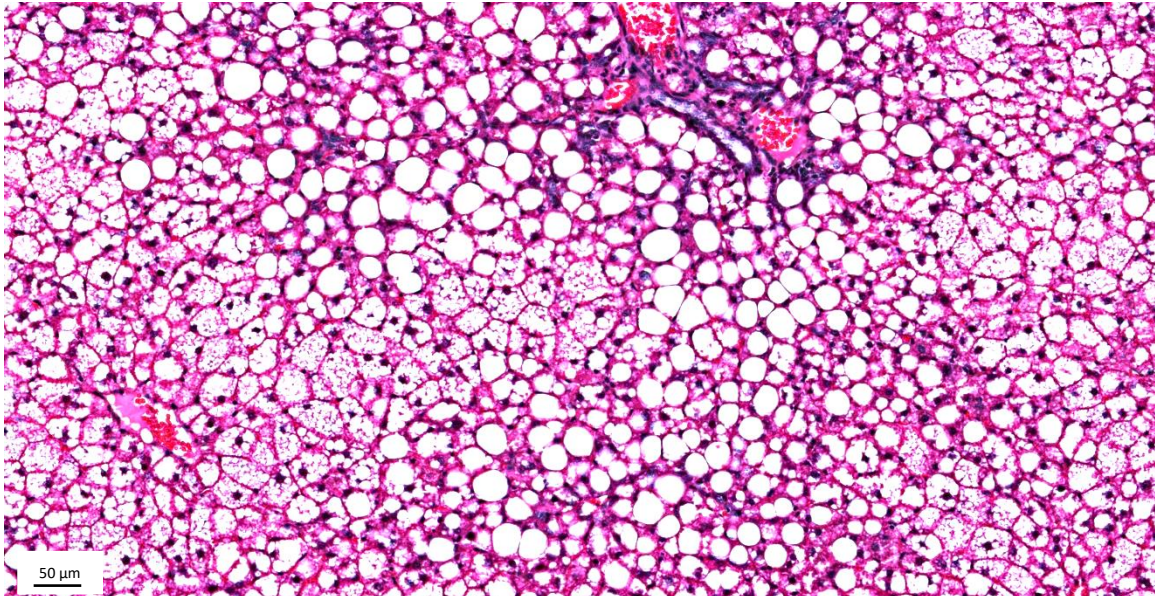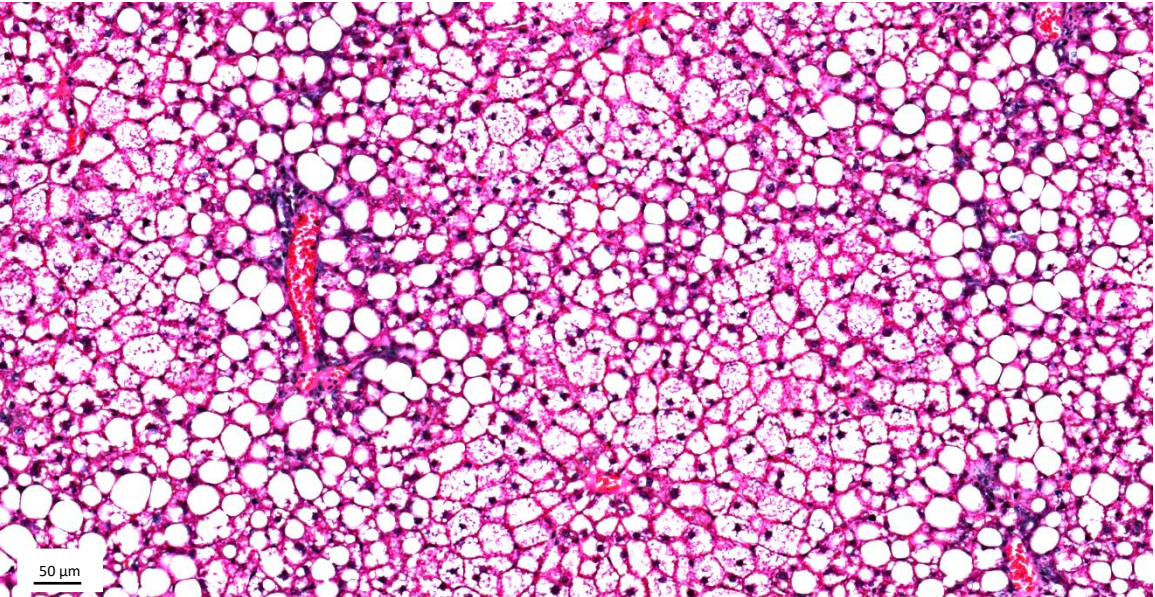

## **H&E Staining**

**CDHFD + *P. distasonis* group**

(12 mice were included)

CDHFD + *P. distasonis* - 1

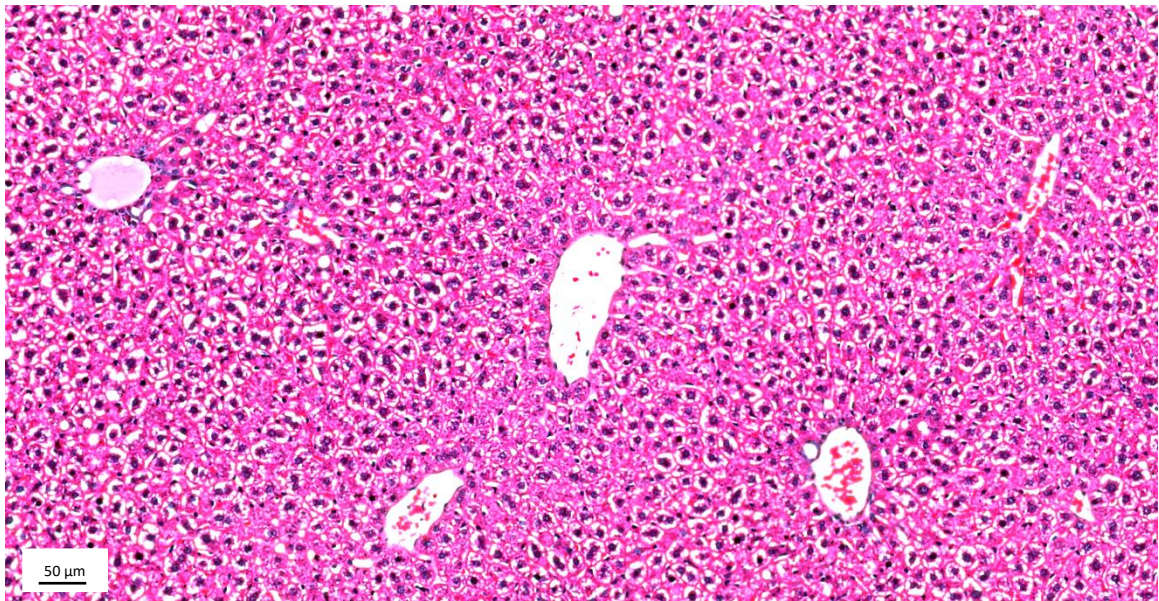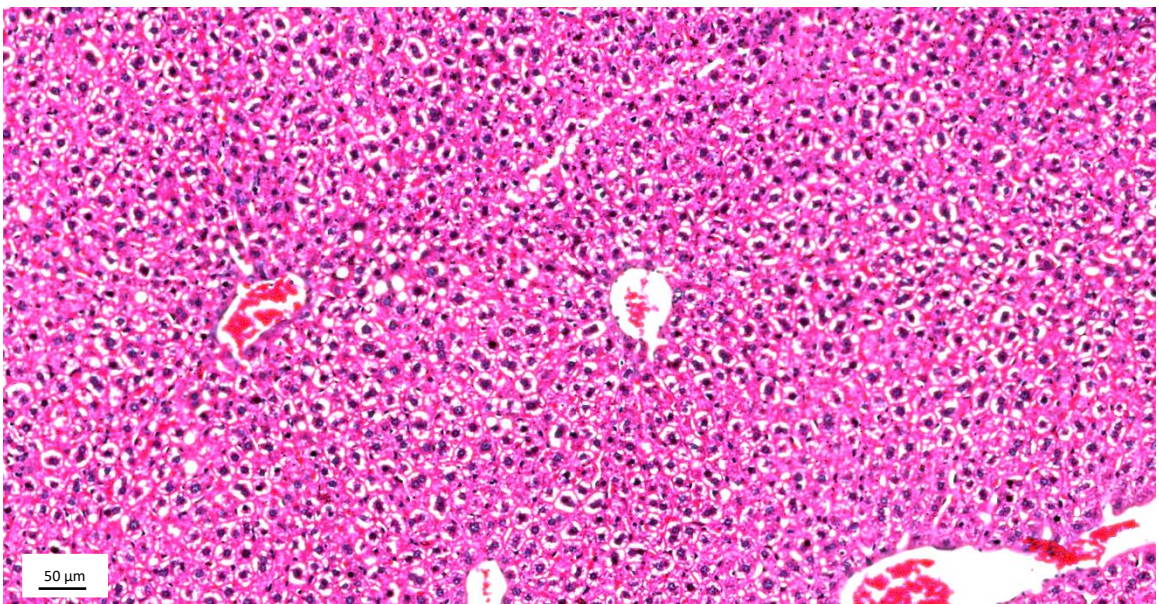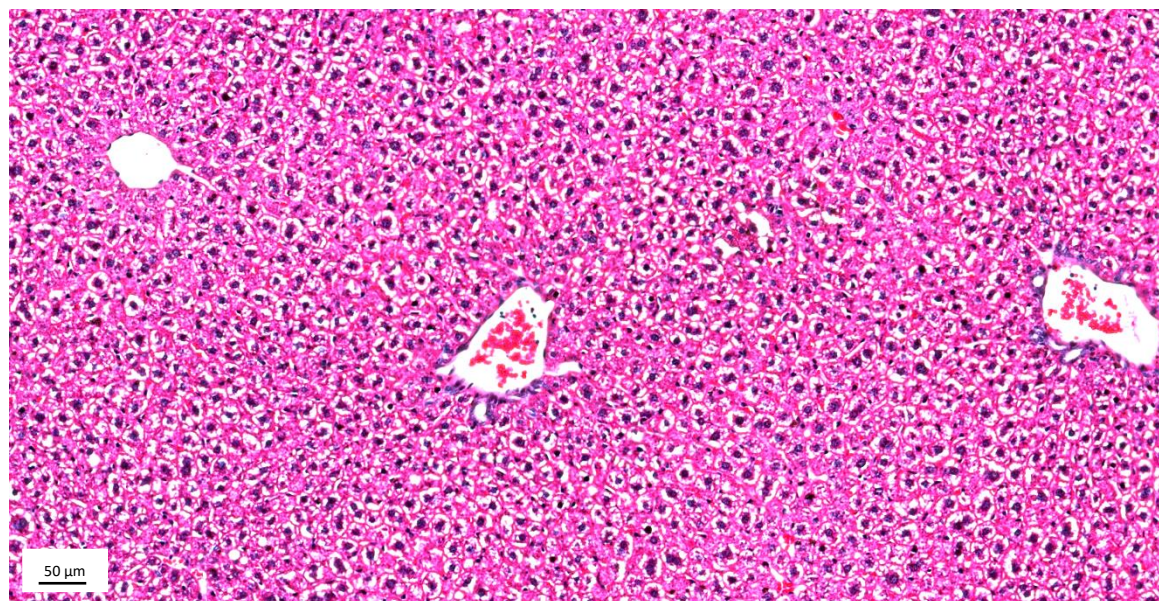

CDHFD + *P. distasonis* - 2

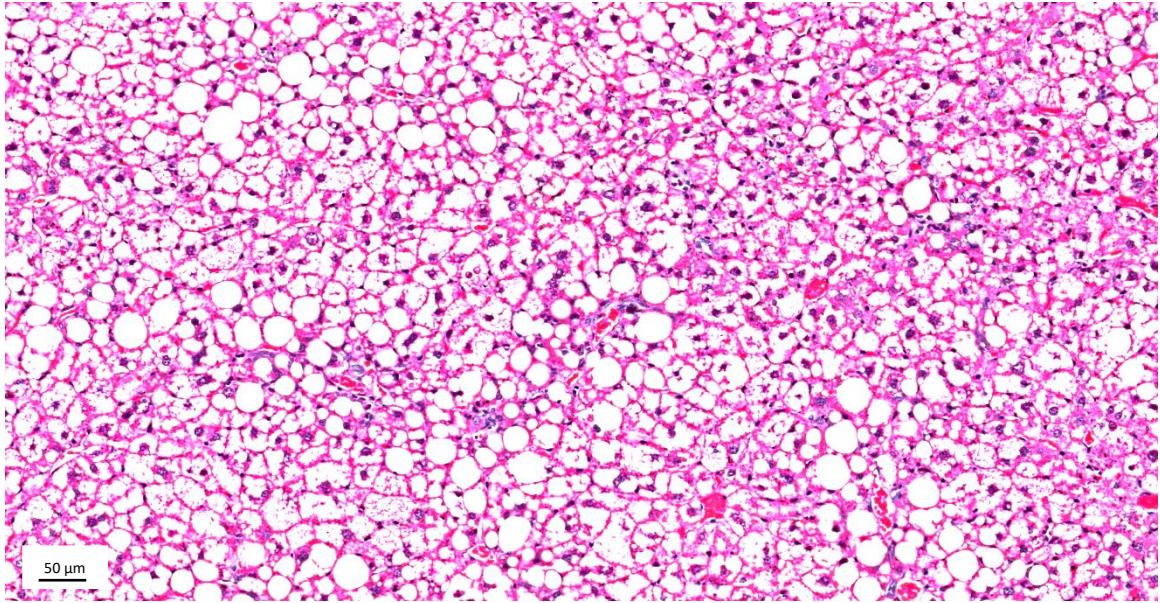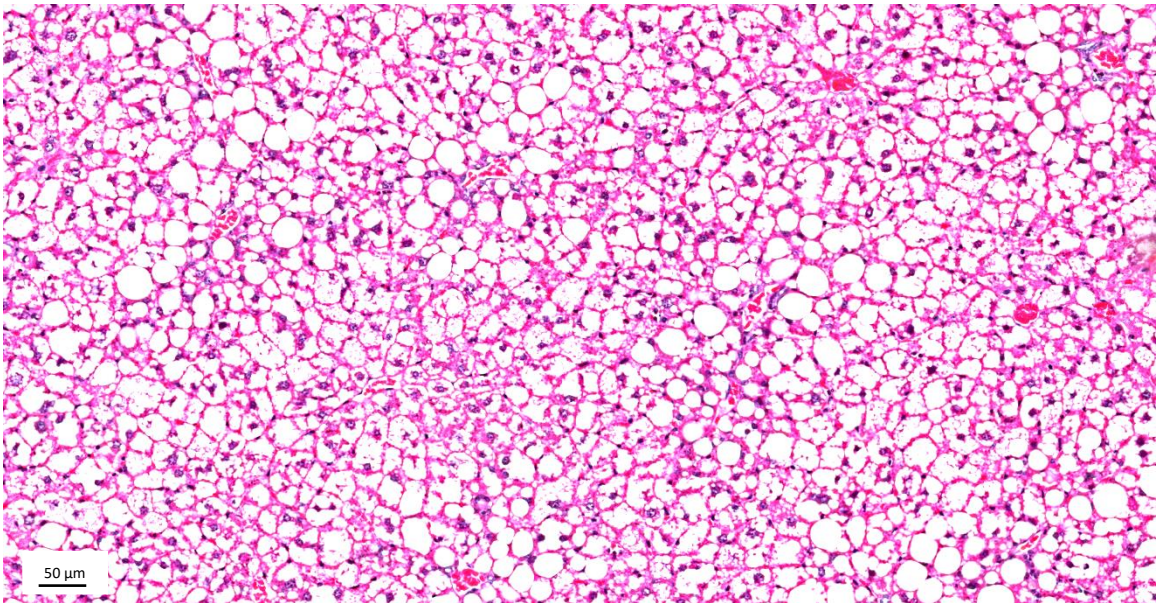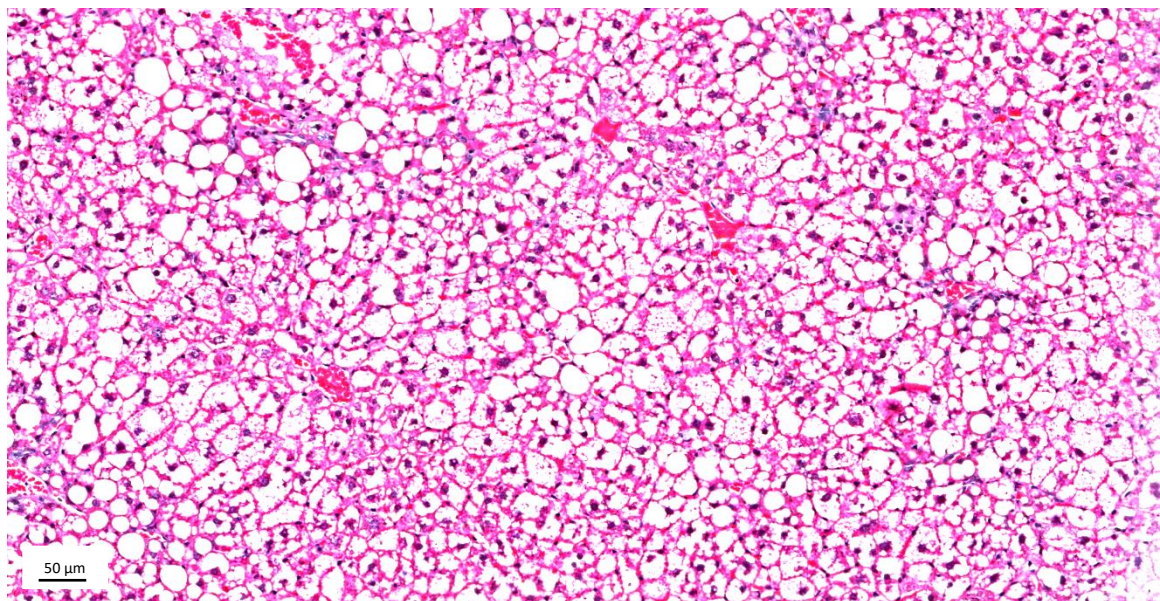

CDHFD + *P. distasonis* - 3

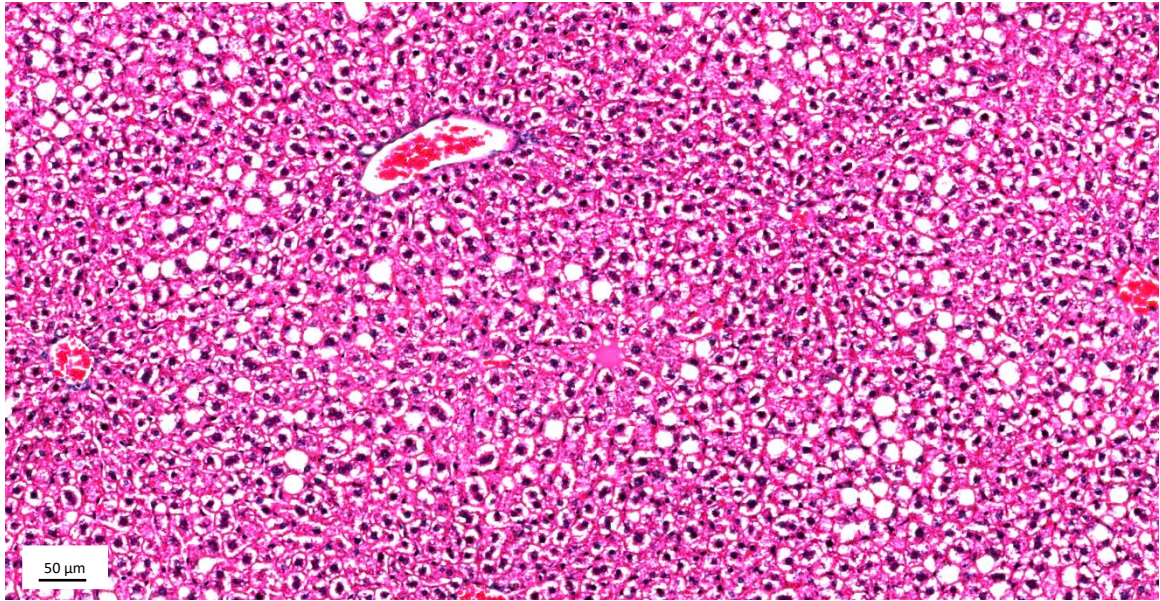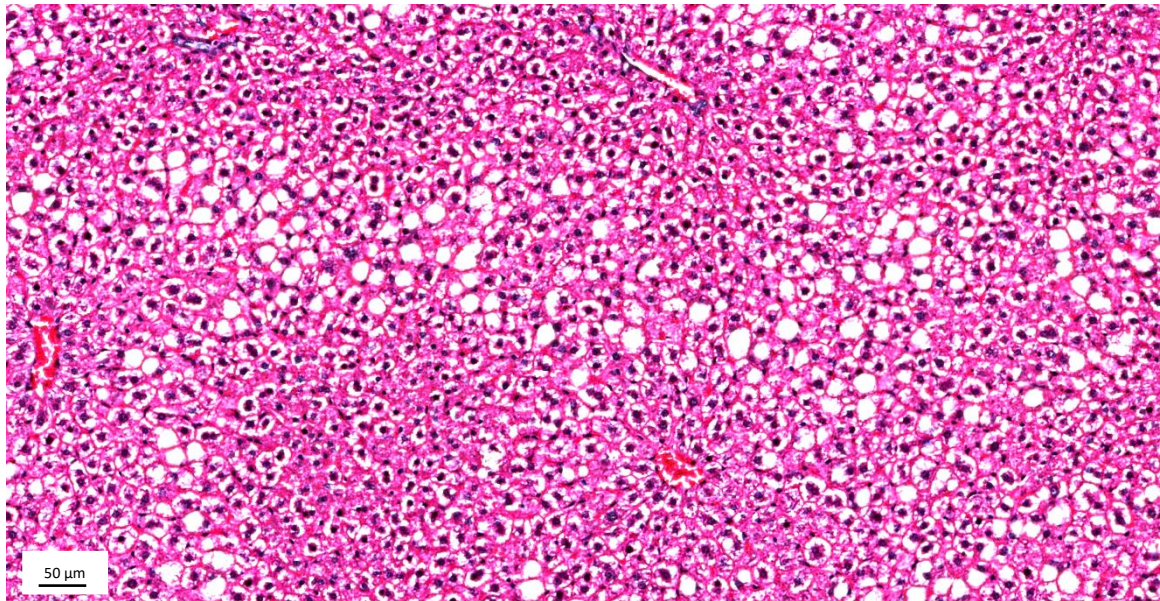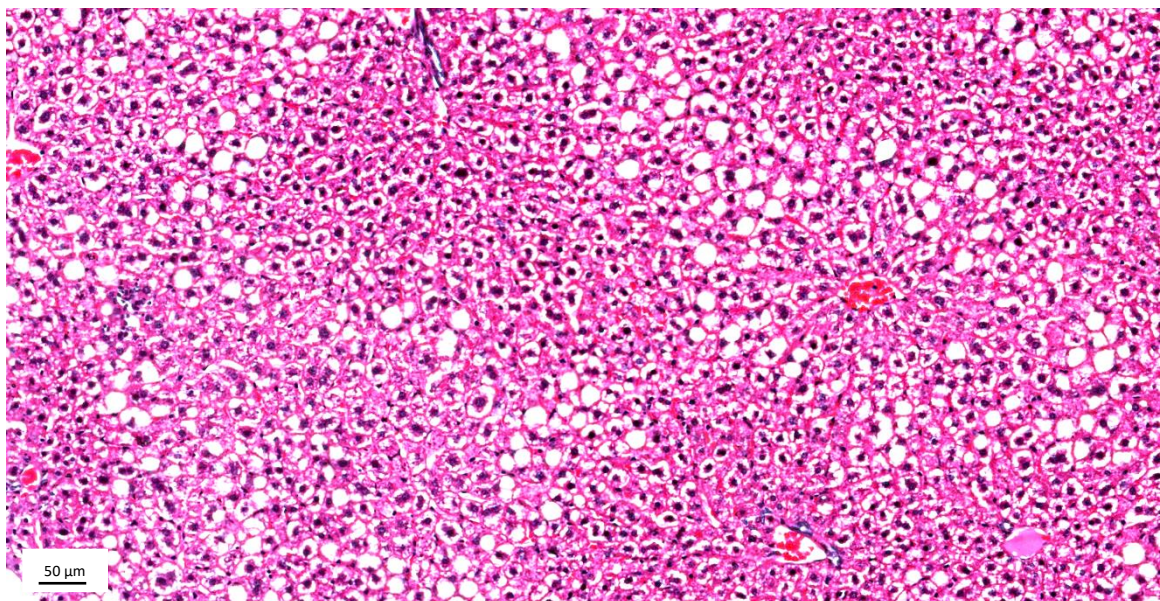

CDHFD + *P. distasonis* - 4

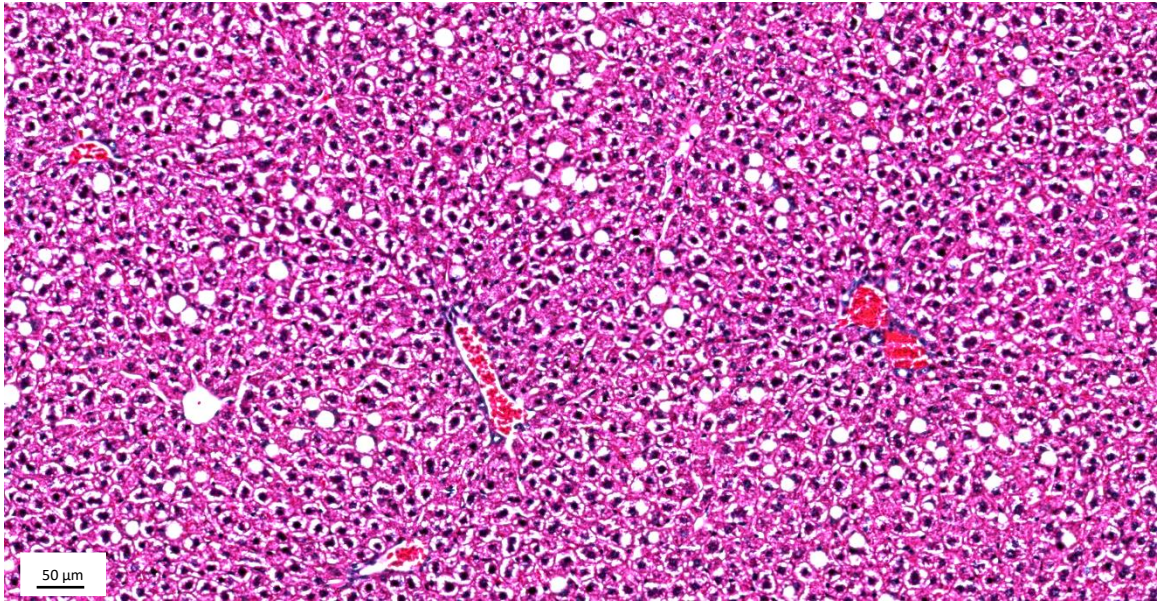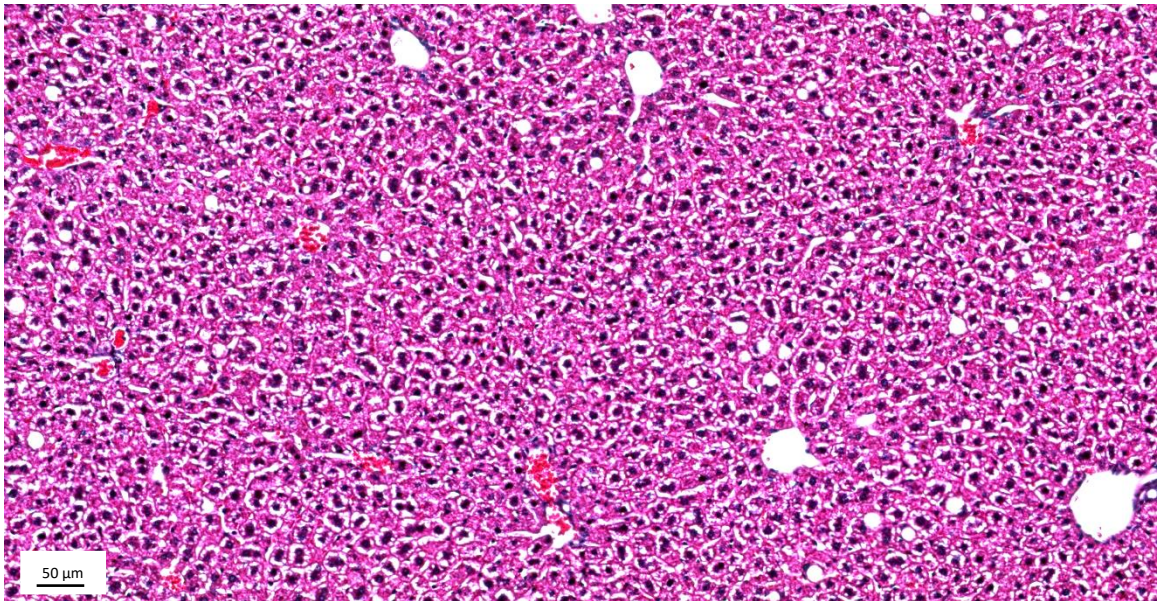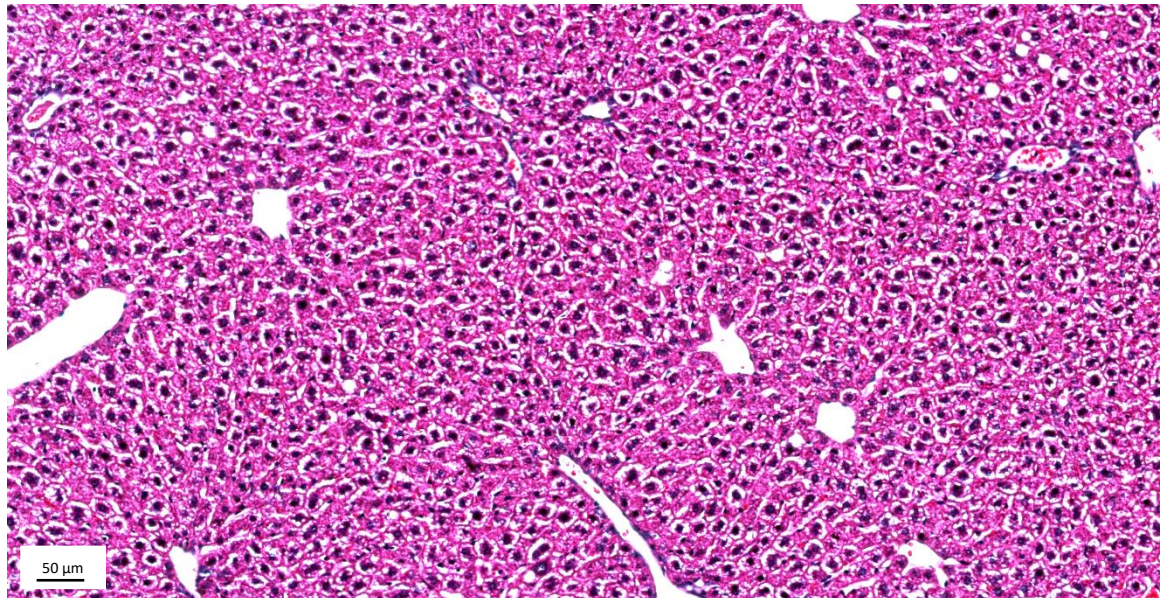

CDHFD + *P. distasonis* - 5

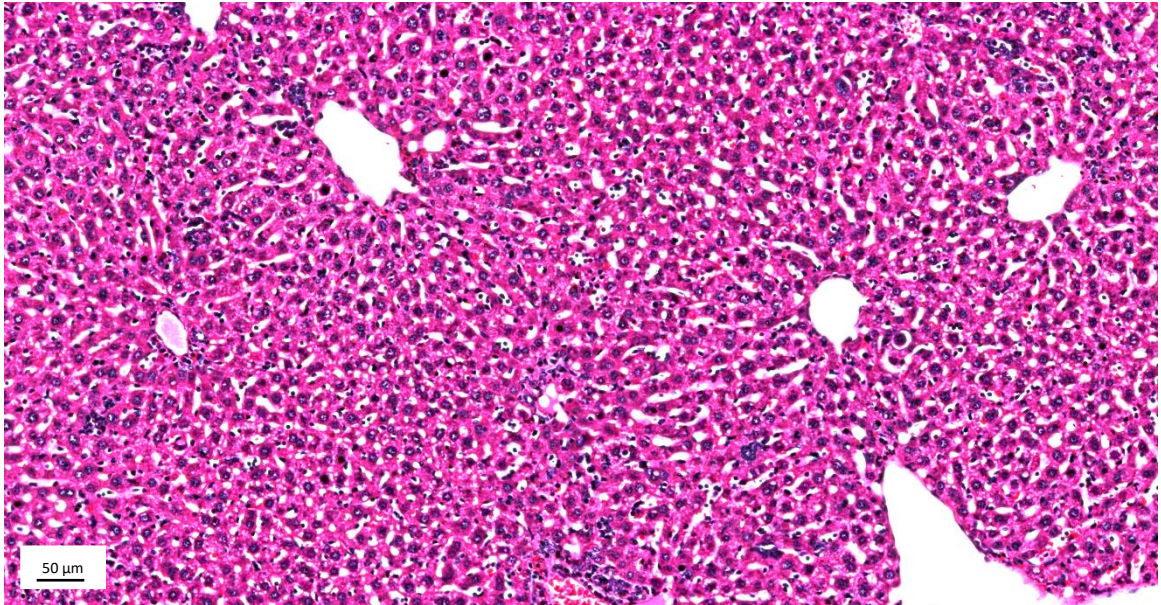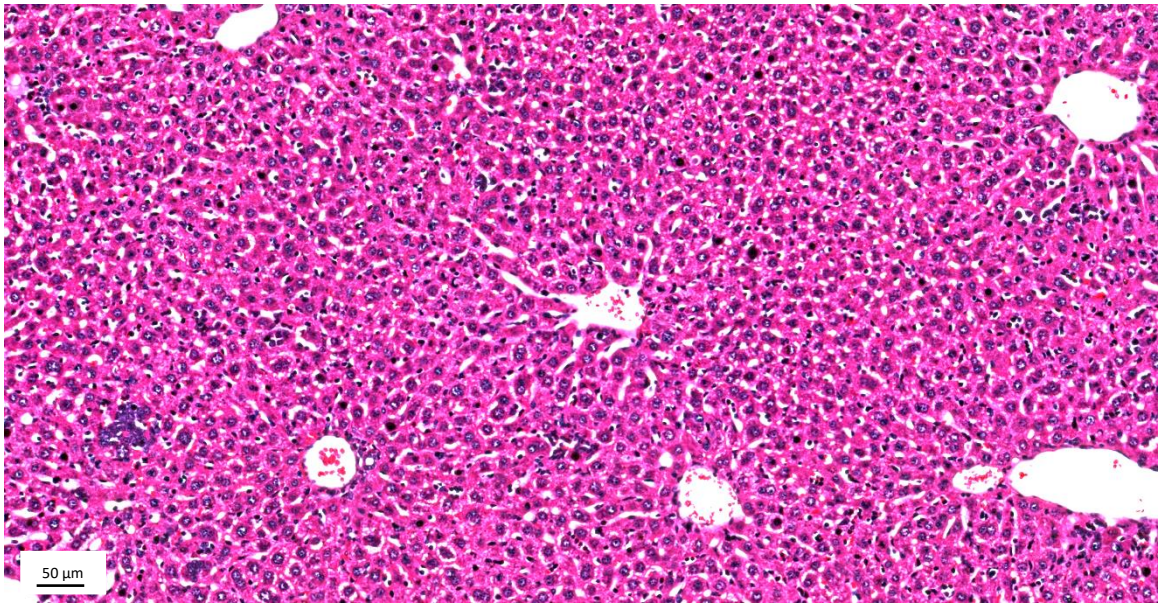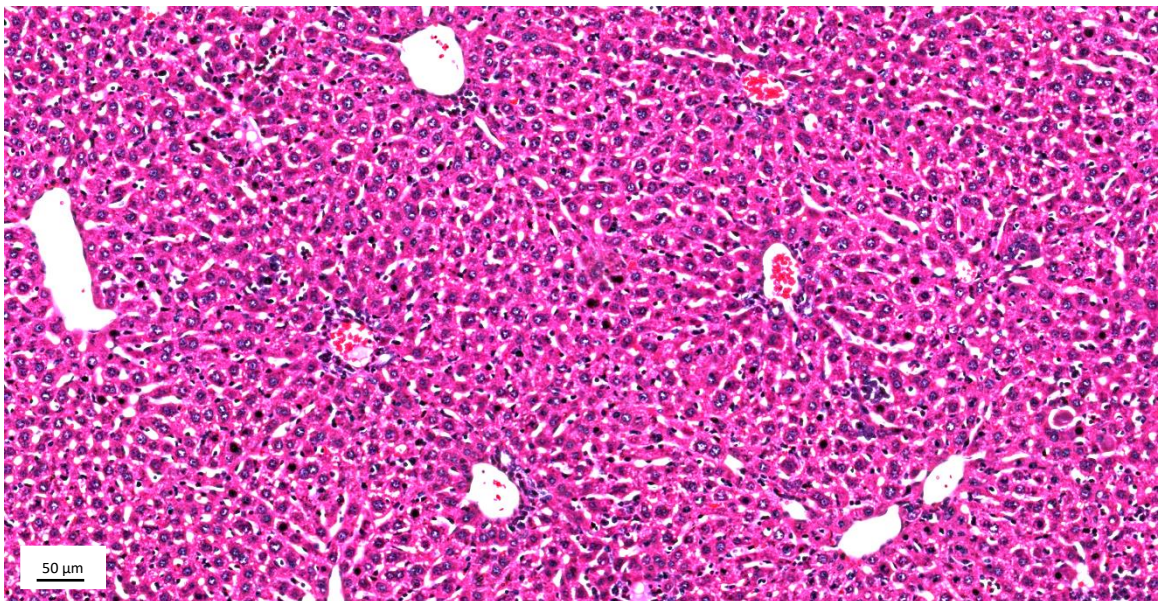



CDHFD + *P. distasonis* - 6

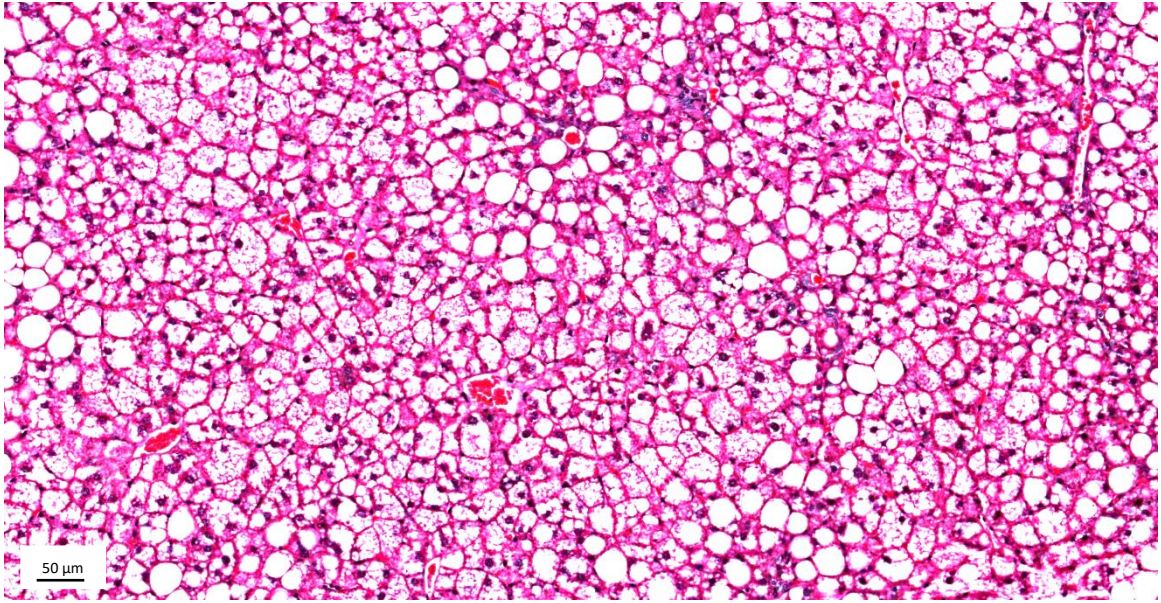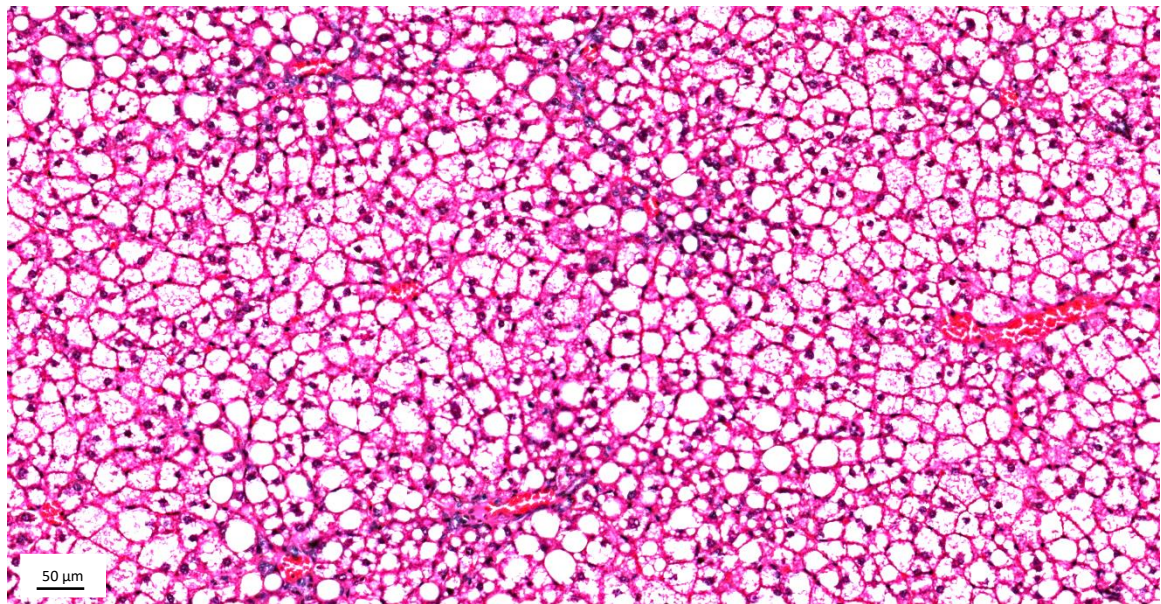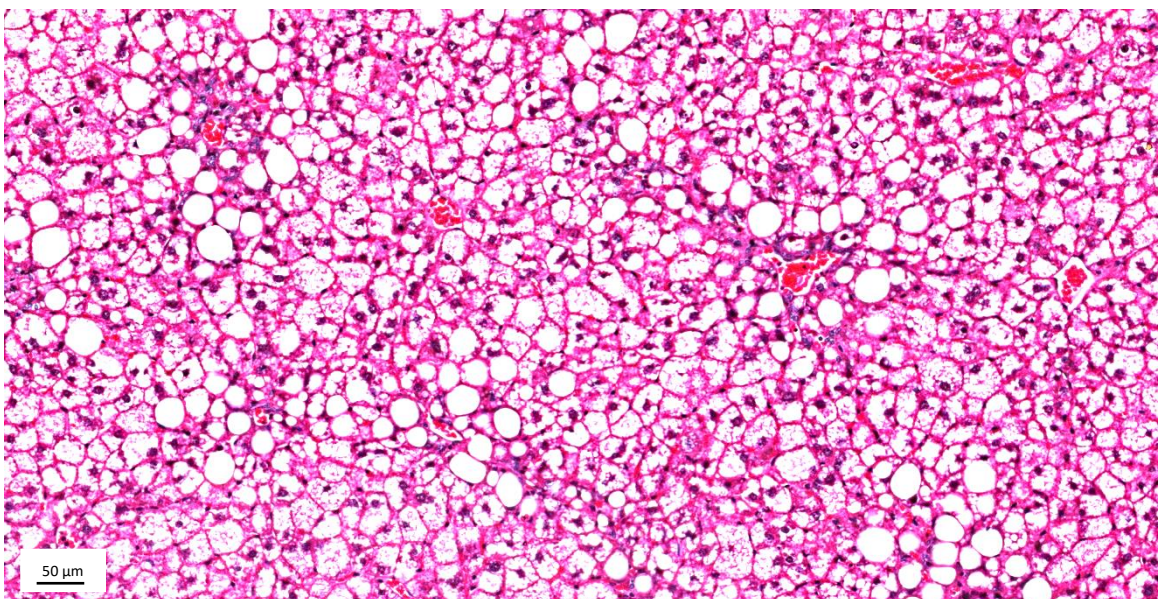

CDHFD + *P. distasonis* - 7

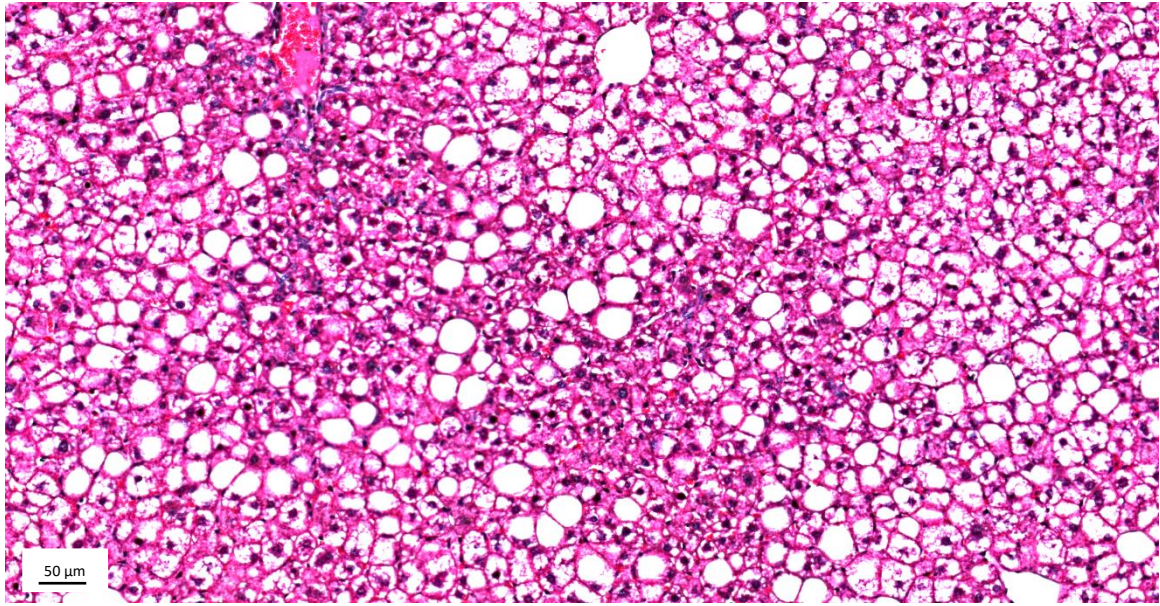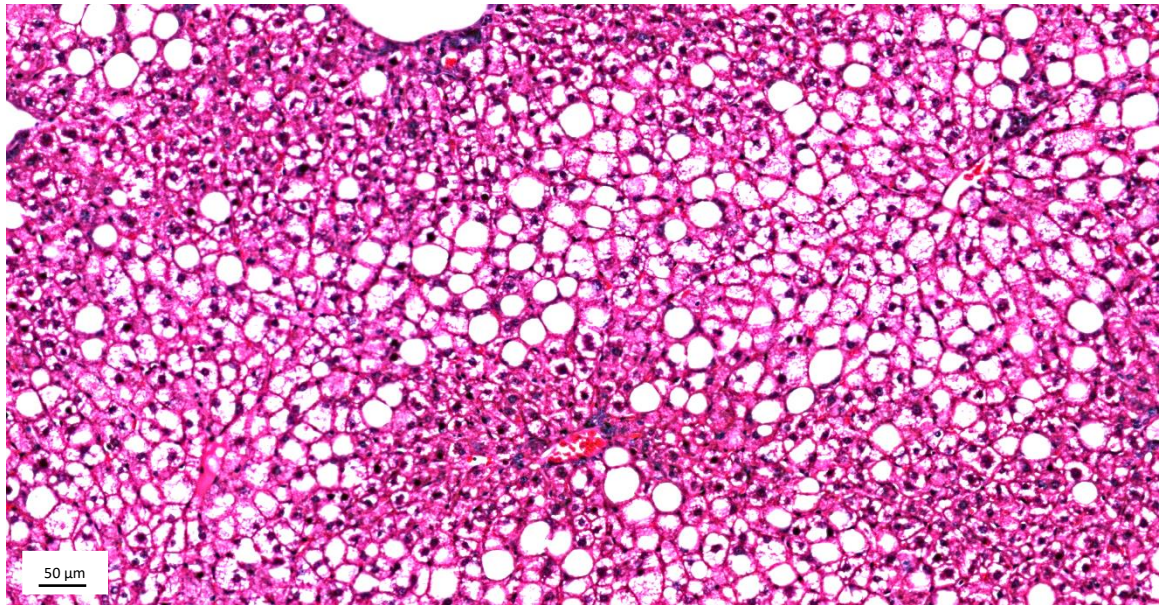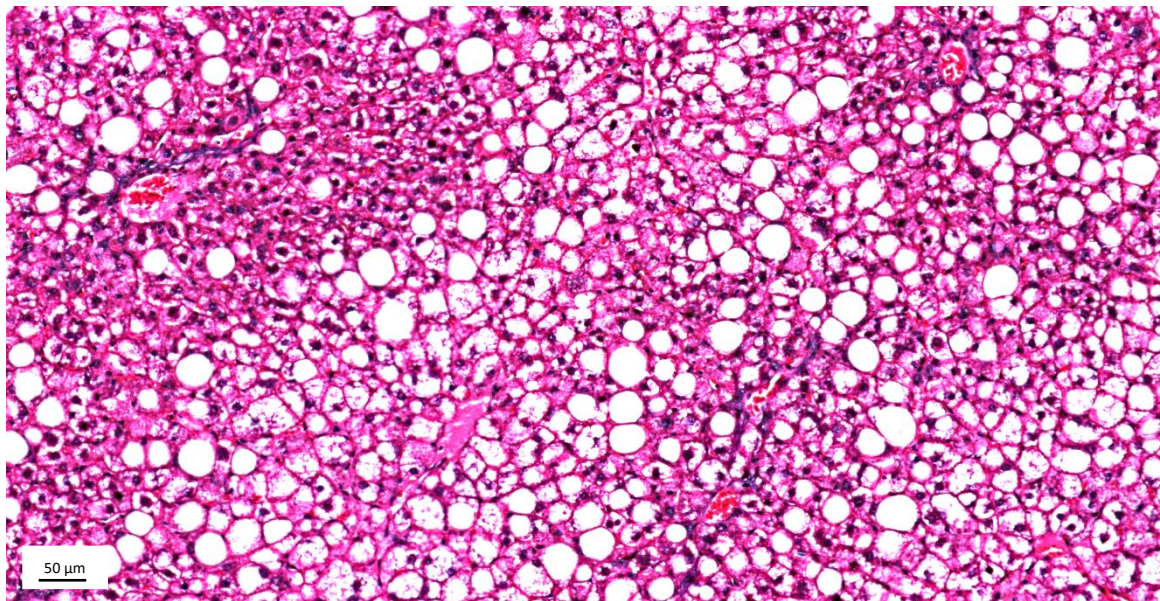

CDHFD + *P. distasonis* - 8

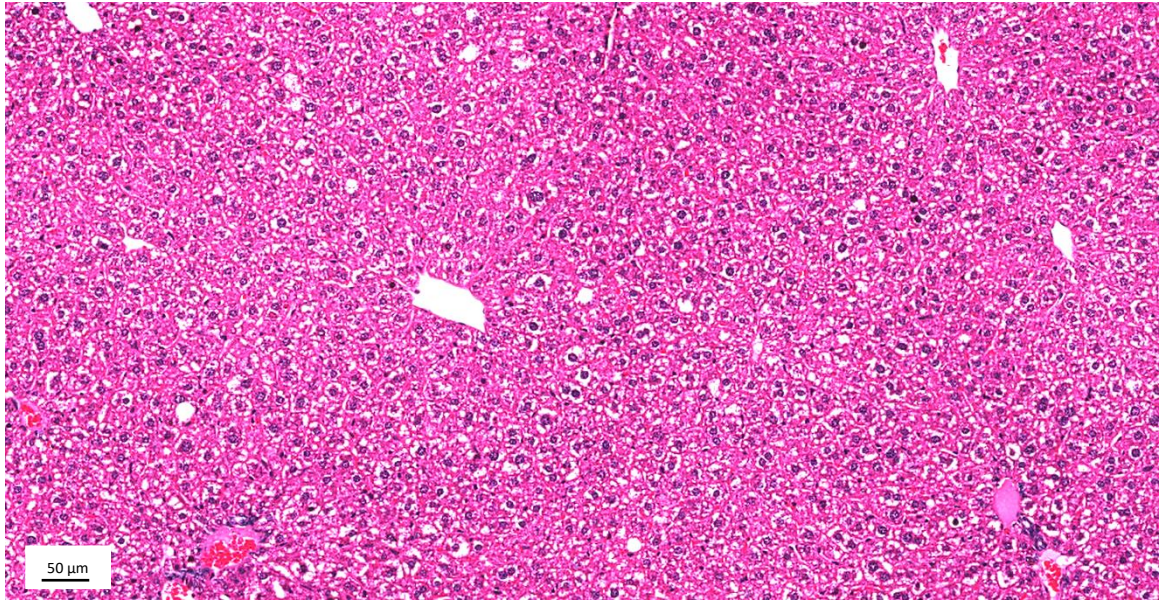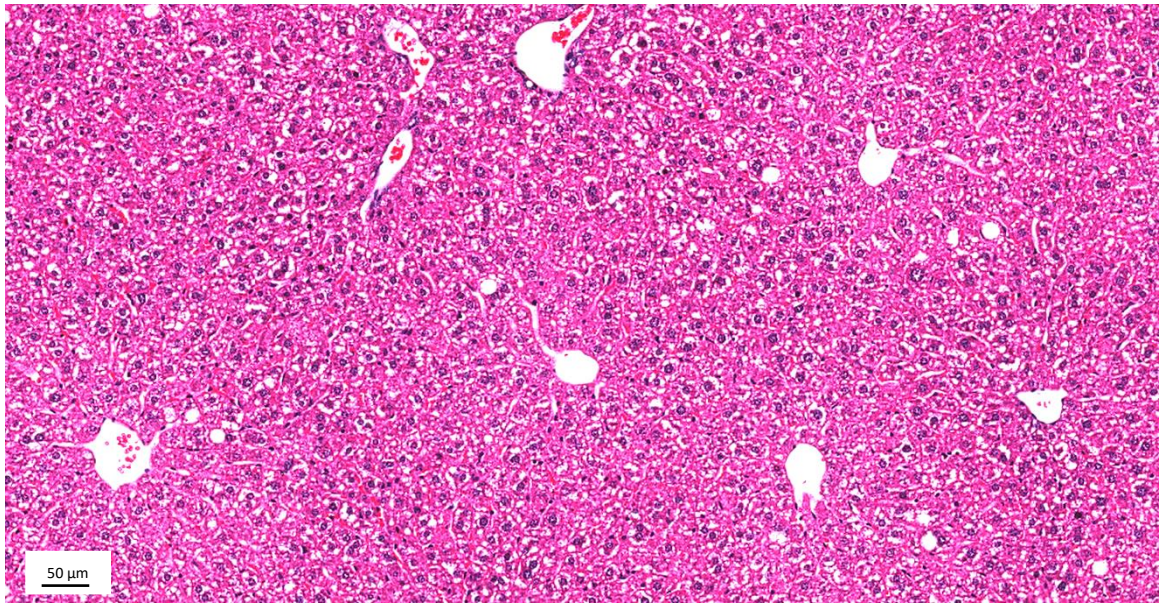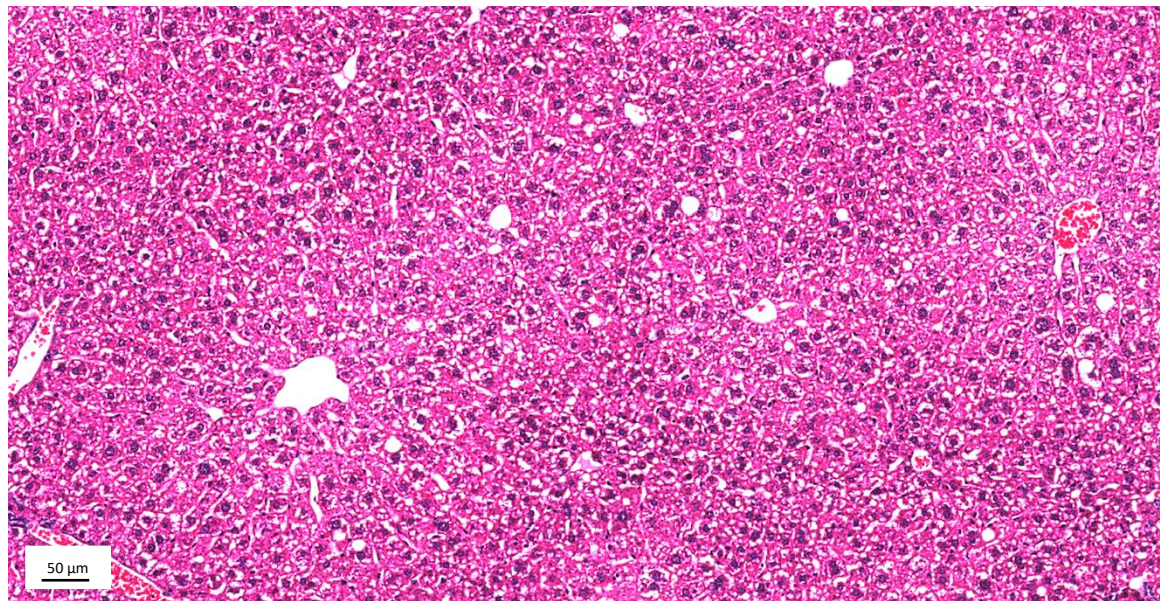

CDHFD + *P. distasonis* - 9

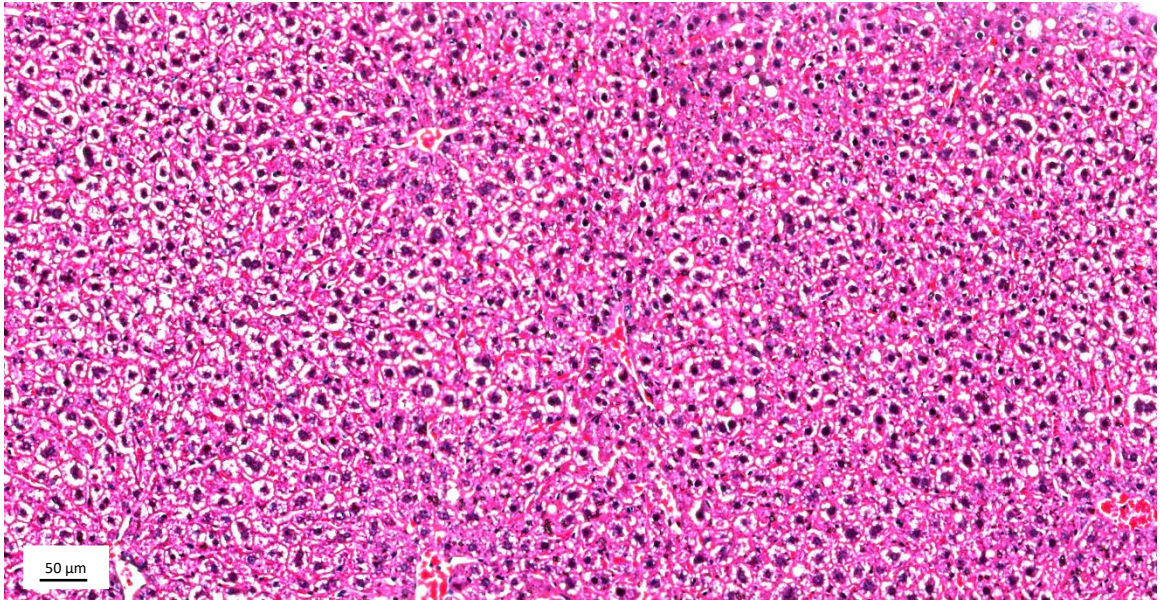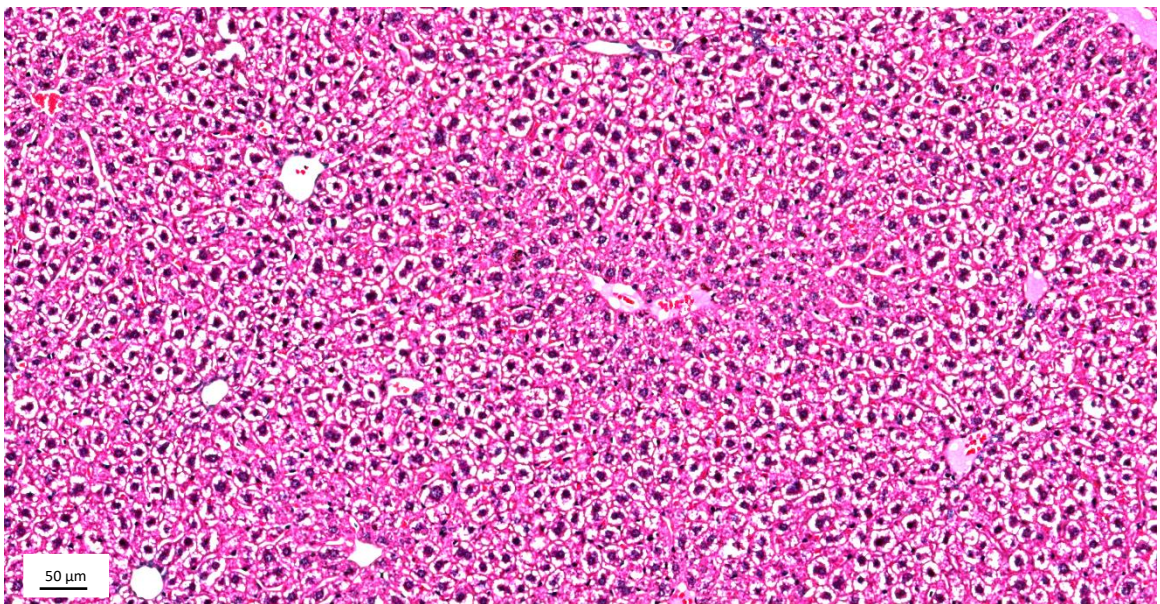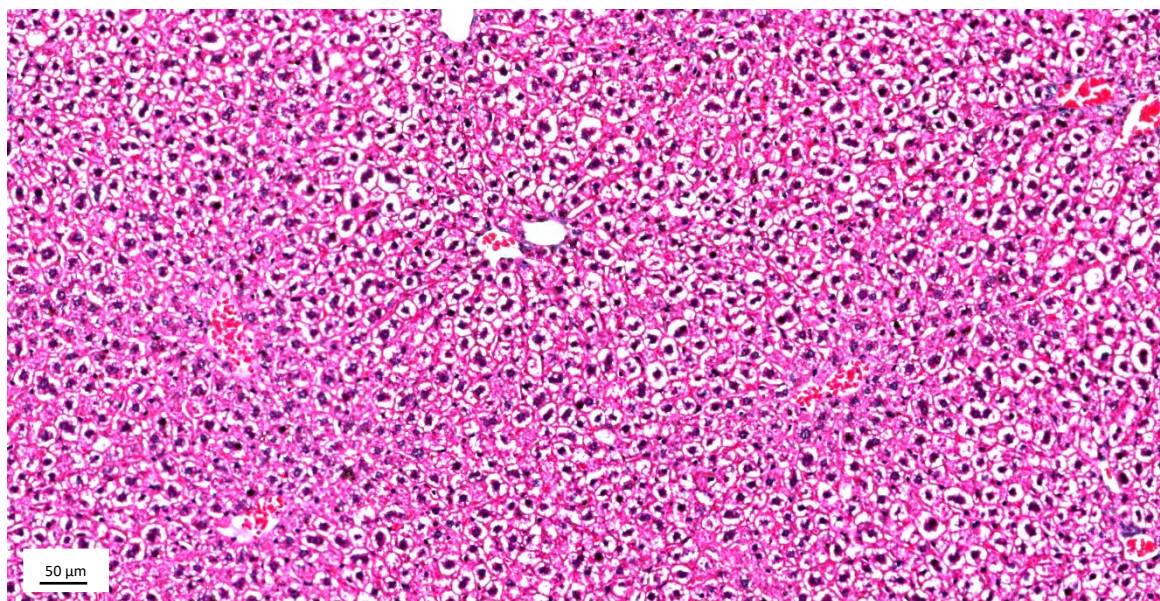

CDHFD + *P. distasonis* - 10

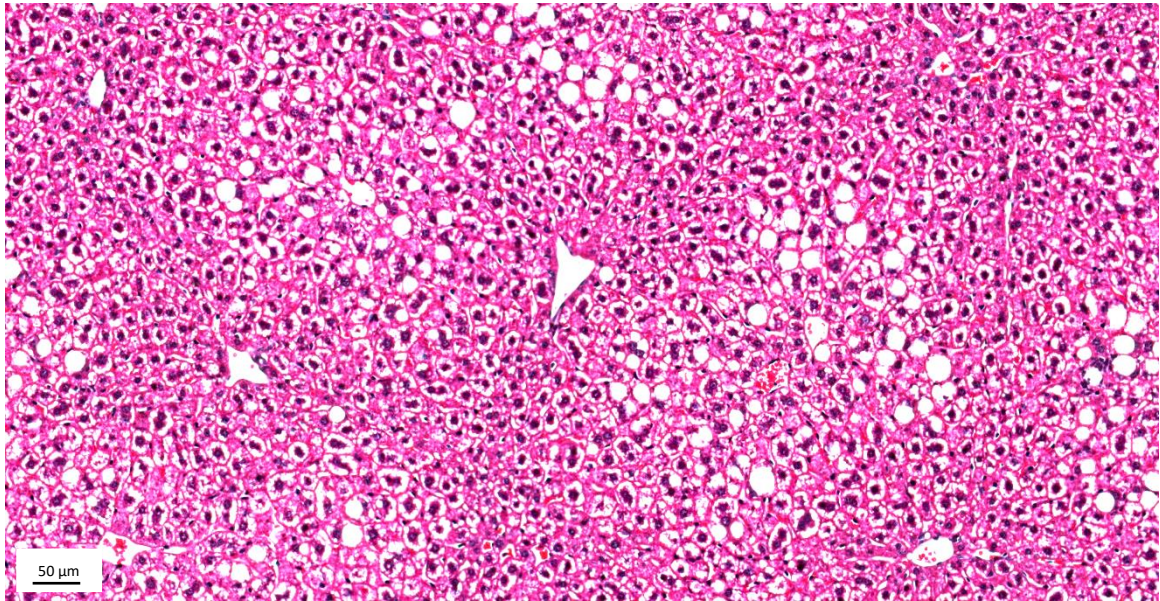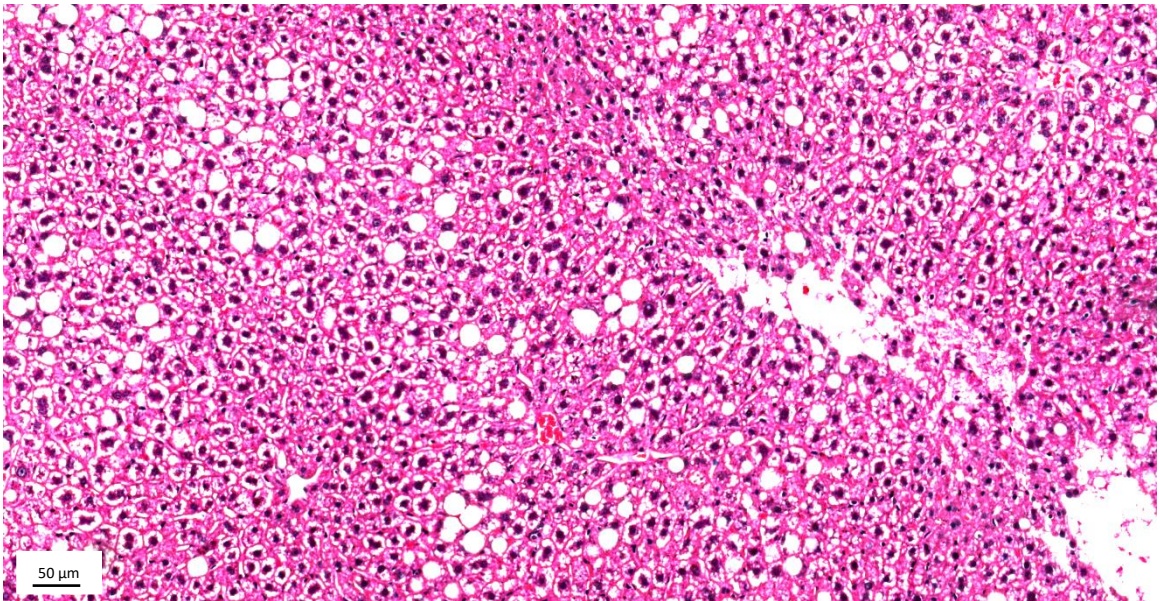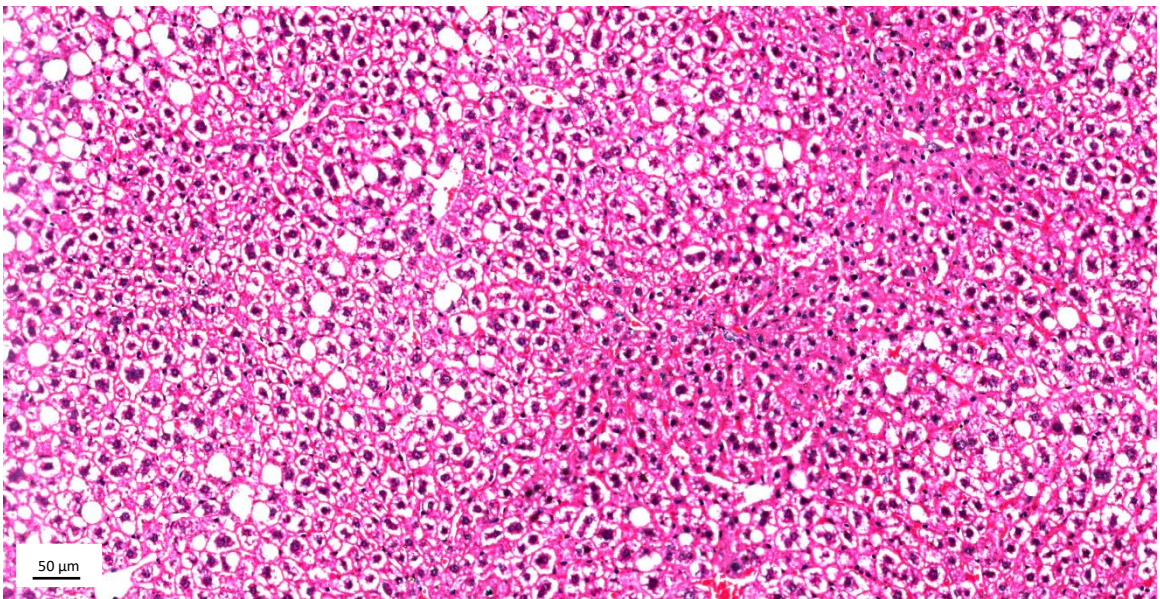

CDHFD + *P. distasonis* - 11

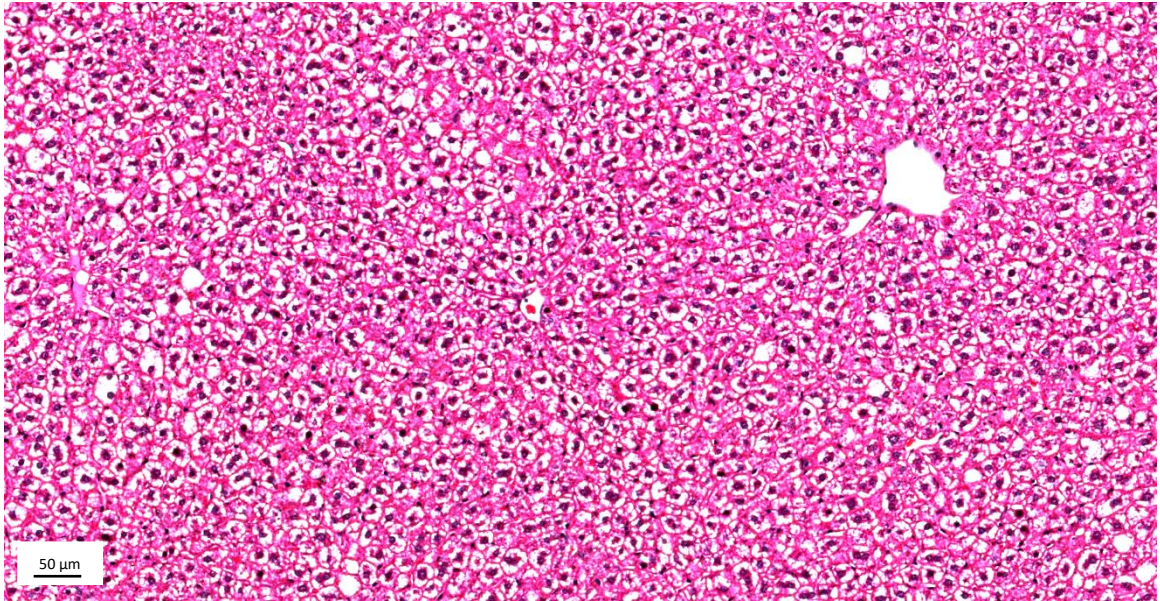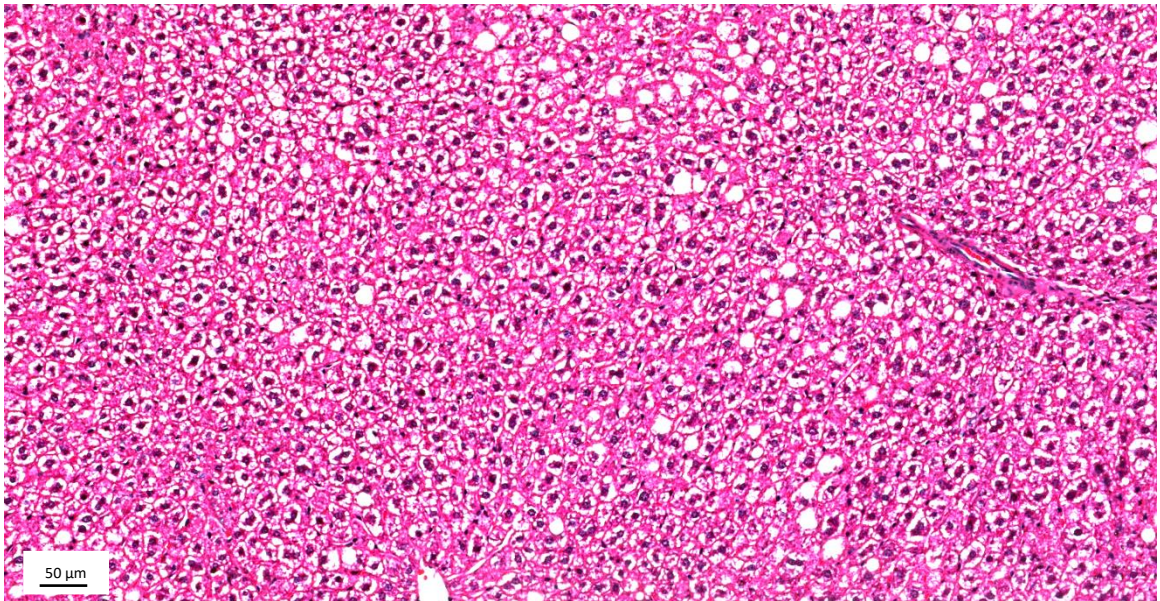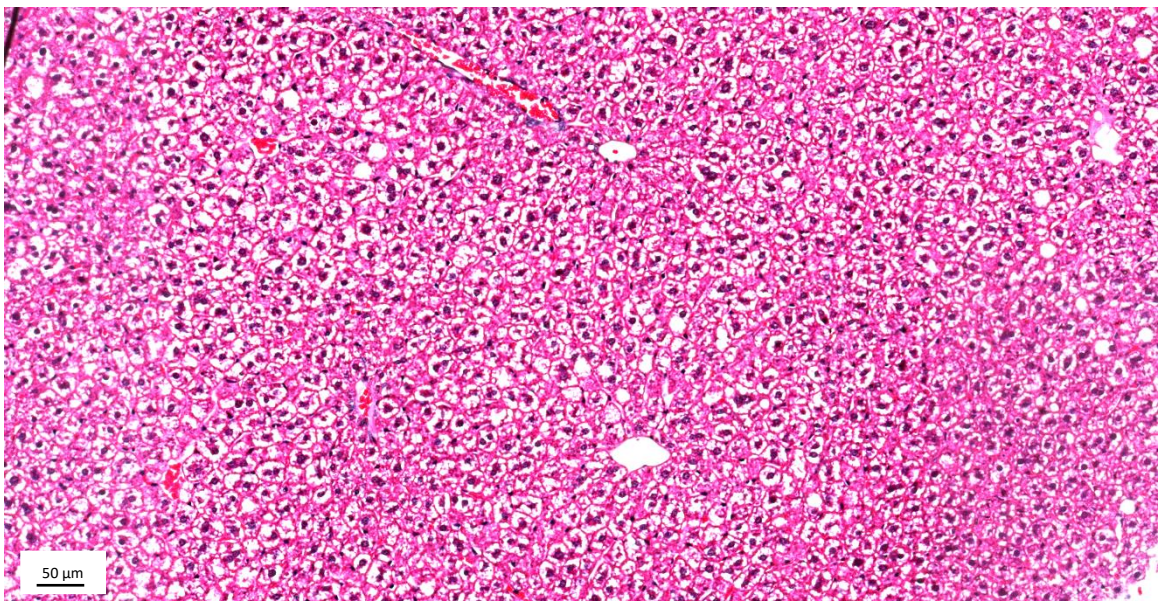

CDHFD + *P. distasonis* - 12

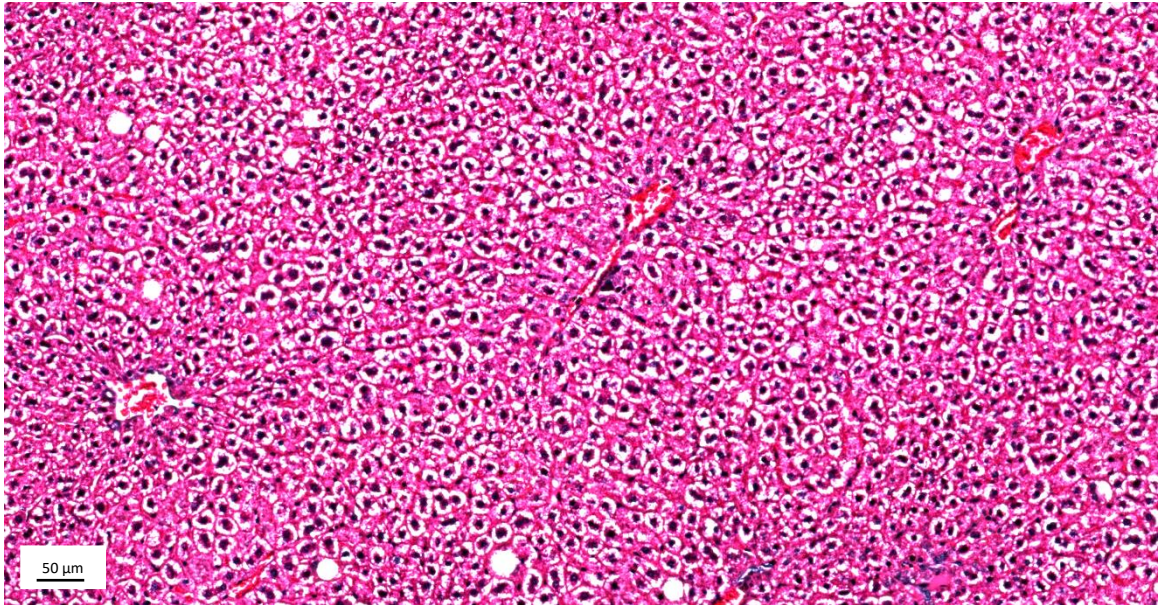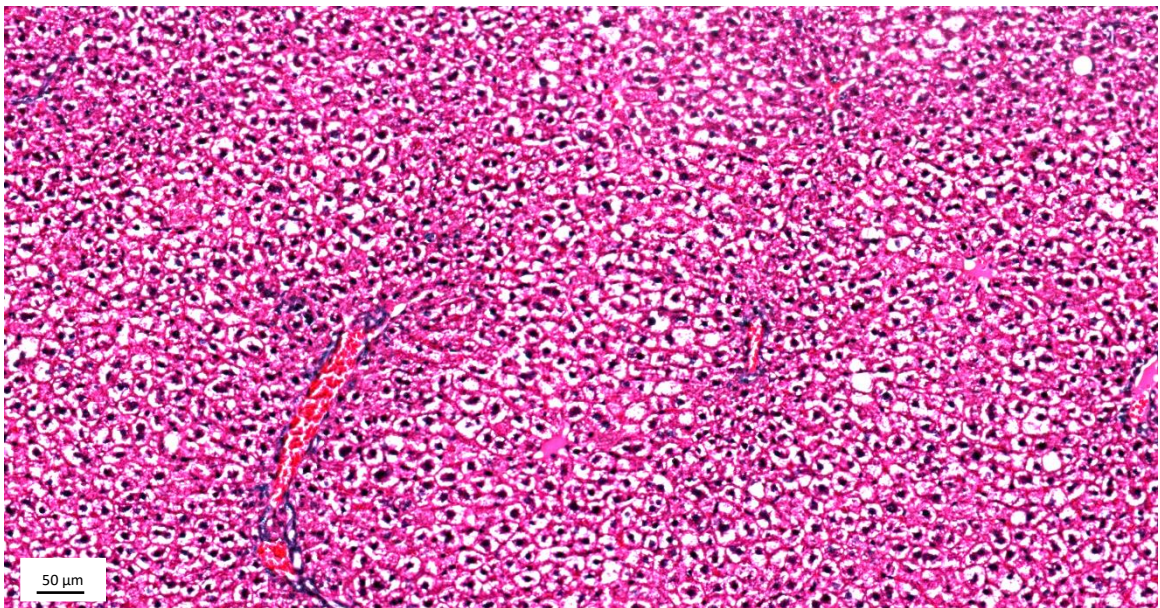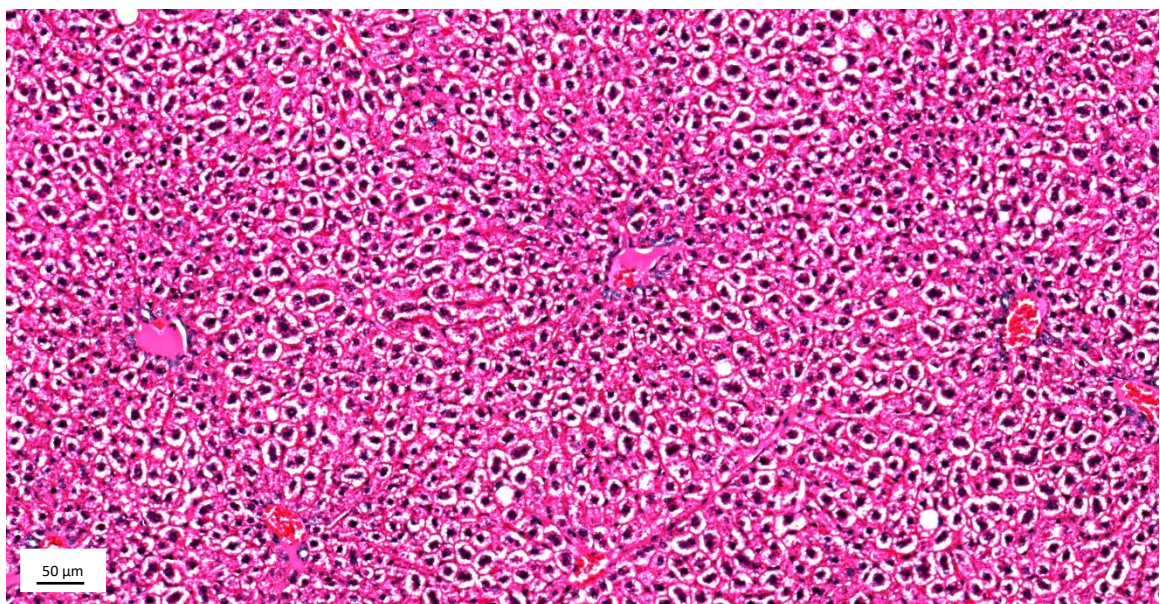

Supplement: 41564_2023_1418_MOESM11_ESM.pdf [file 41564_2023_1418_MOESM11_ESM.pdf]
