# Supplementary material for: Parabacteroides distasonis uses dietary inulin to suppress NASH via its metabolite pentadecanoic acid
Source: PubMed Central journal article supplement (PMC10390331; doi:10.1038/s41564-023-01418-7), 2023-06-29

# Source images for Extended Figure 1

Including H&E staining and sirius red staining  
Replicate images from a same mouse were  
displayed within a same page

**H&E Staining**

**NCD group**

(7 mice were included)



# NCD-1

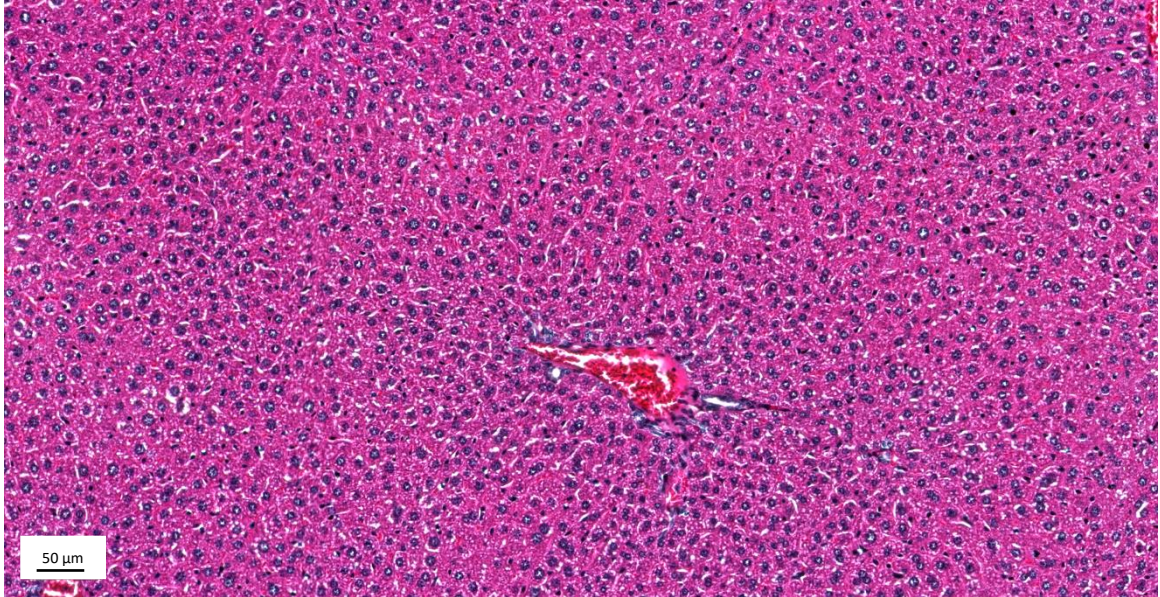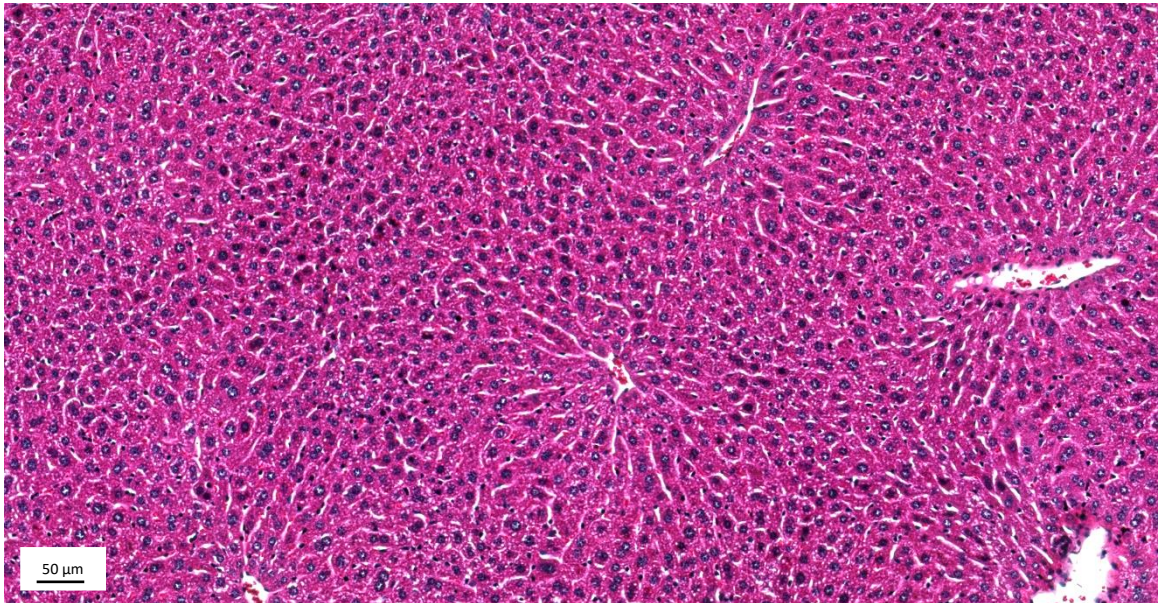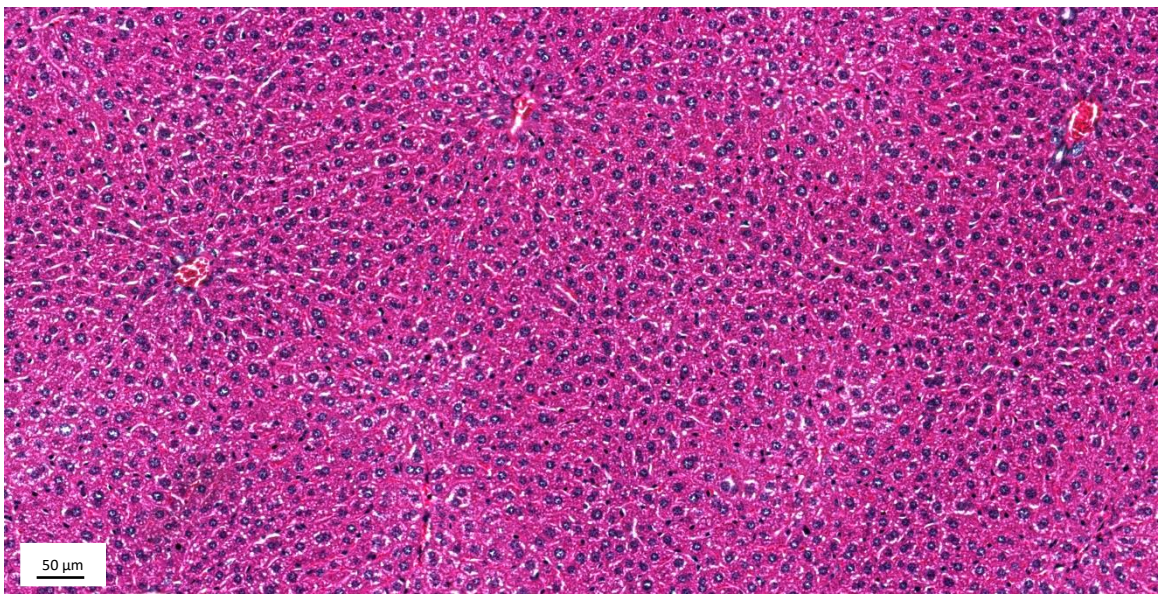



# NCD-2

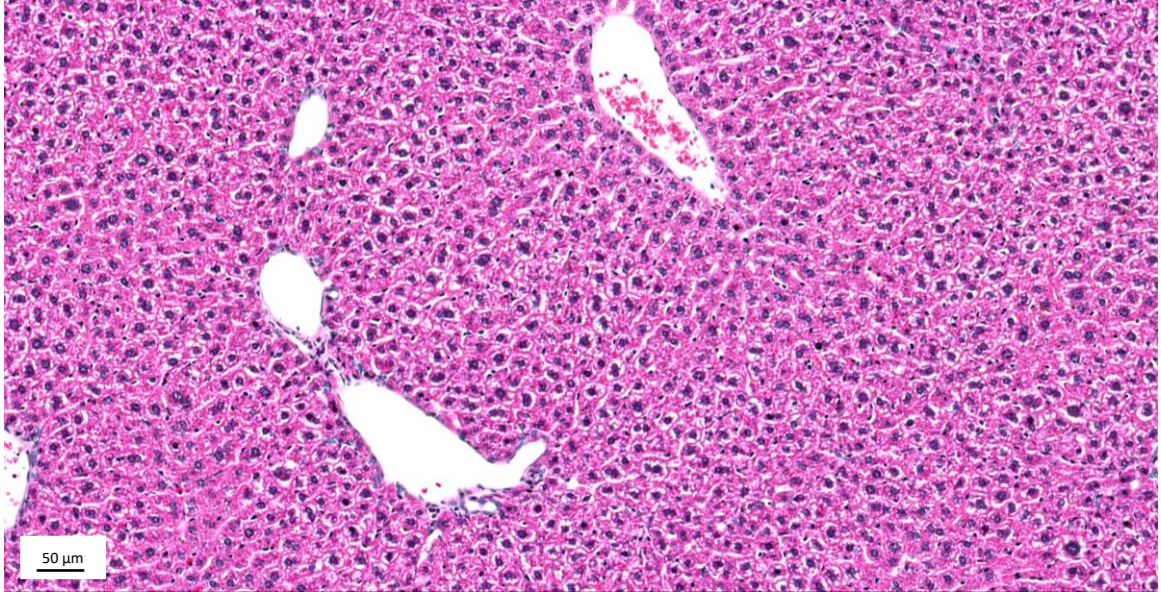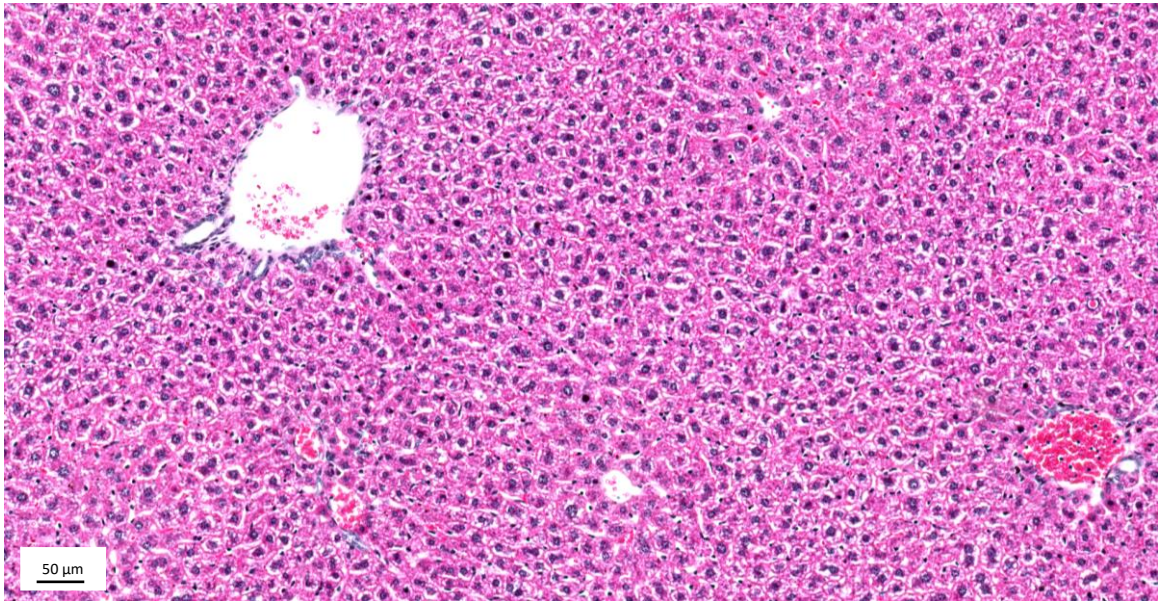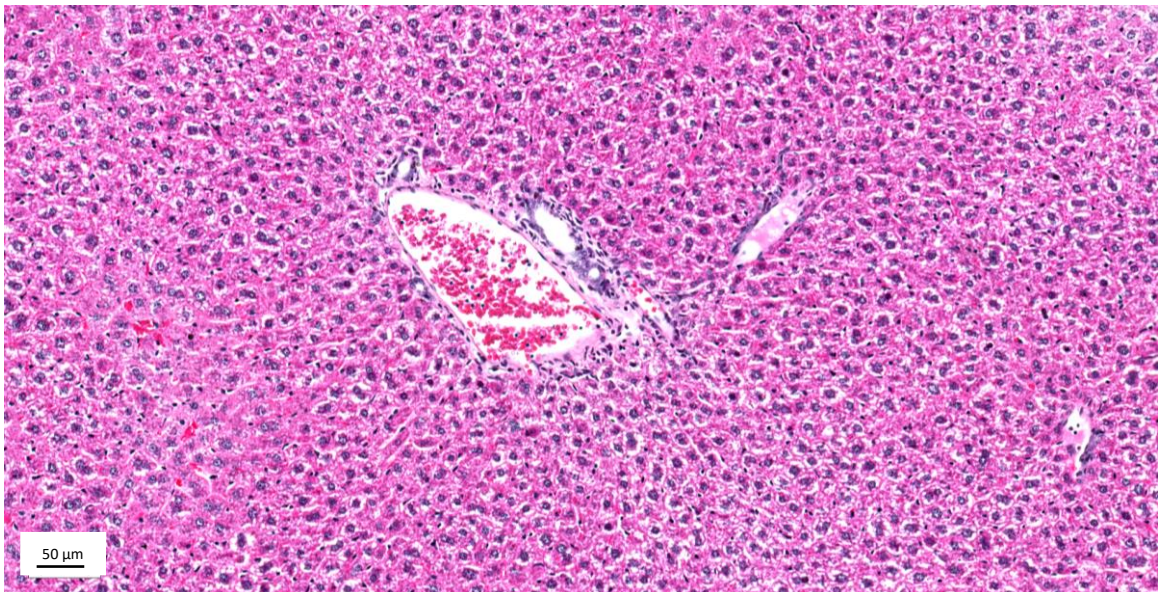



# NCD-3

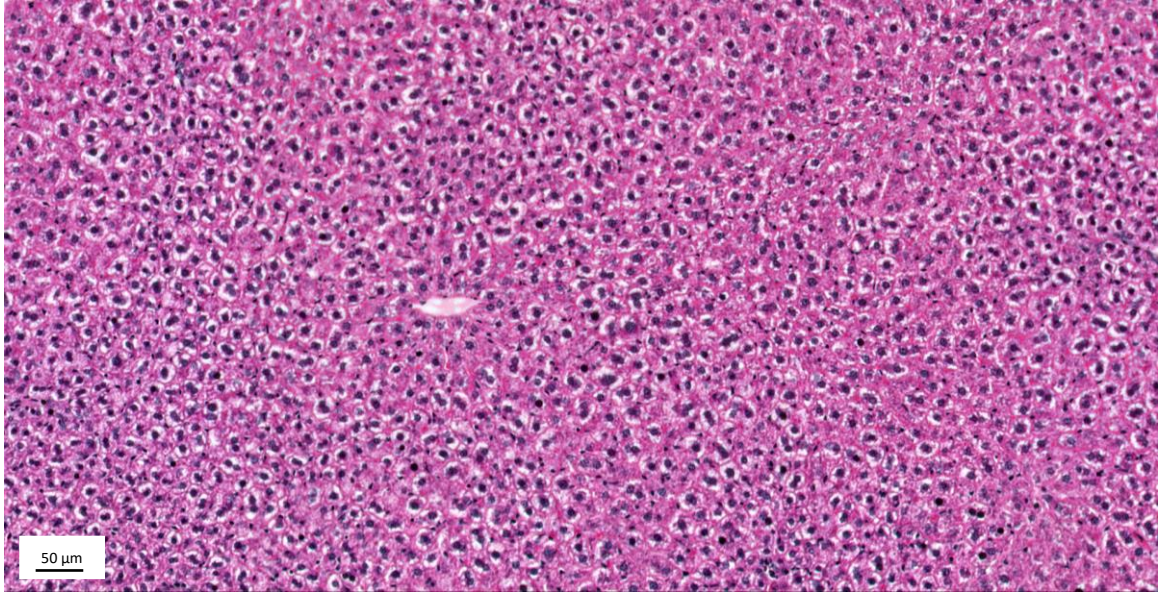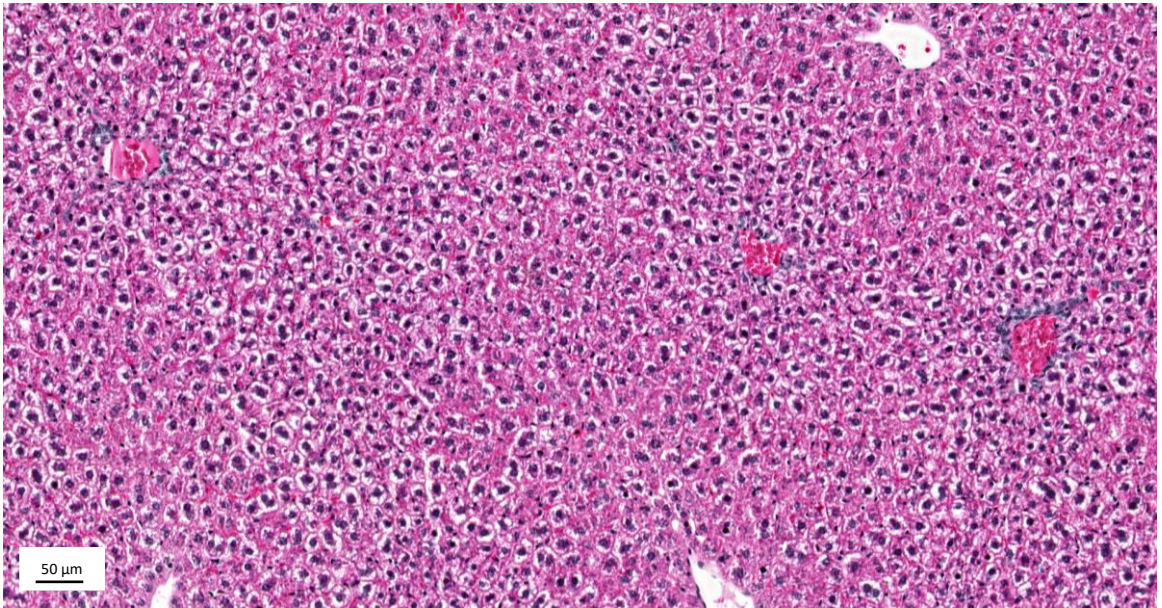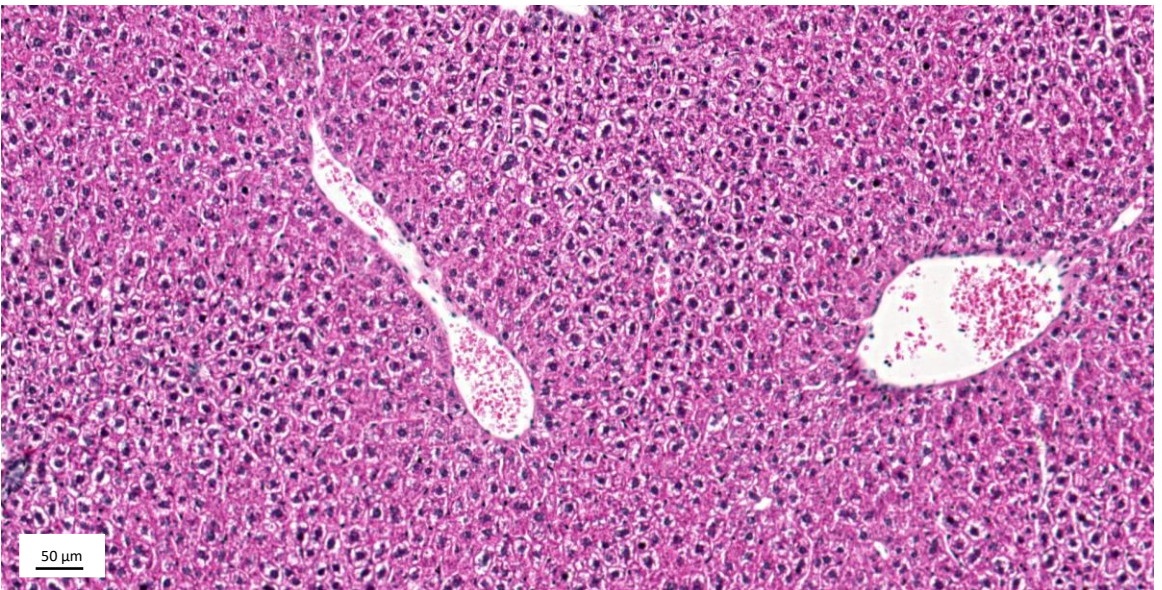



# NCD-4

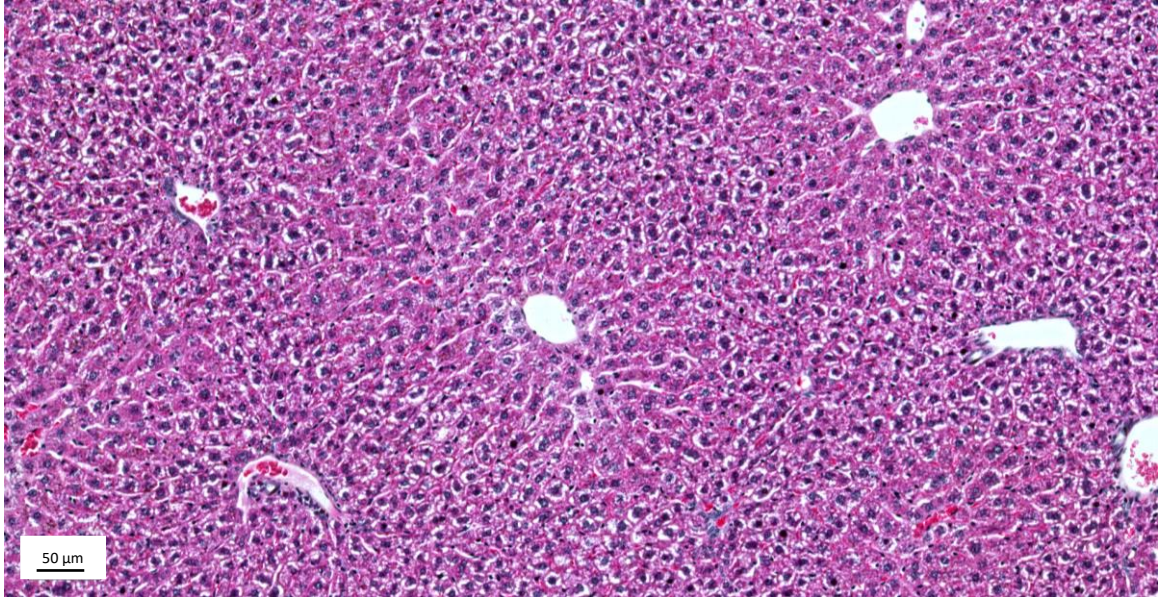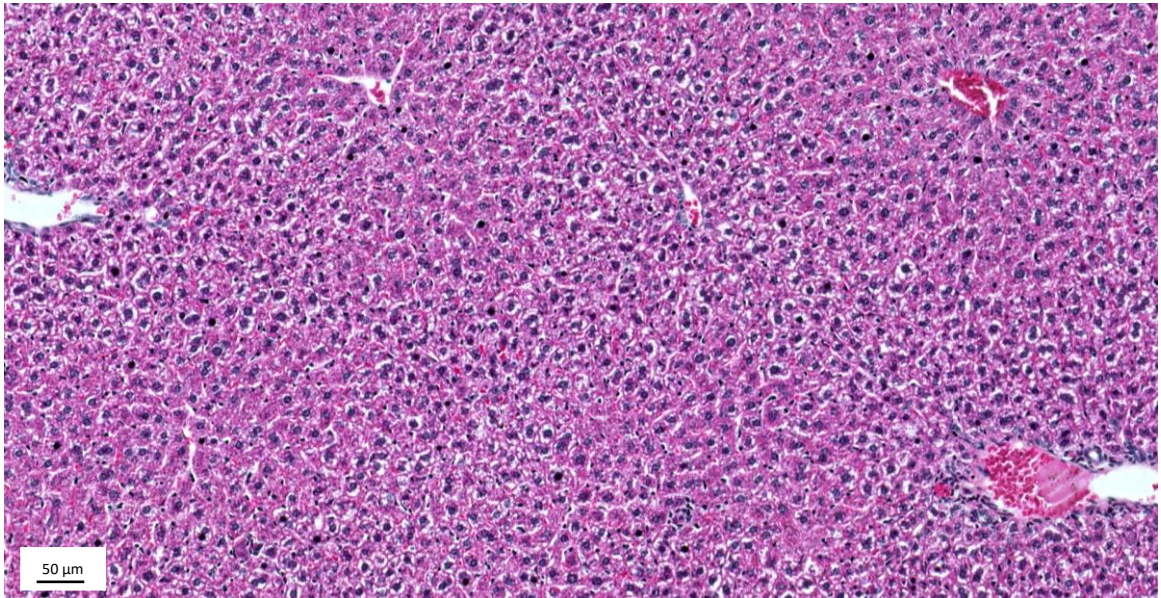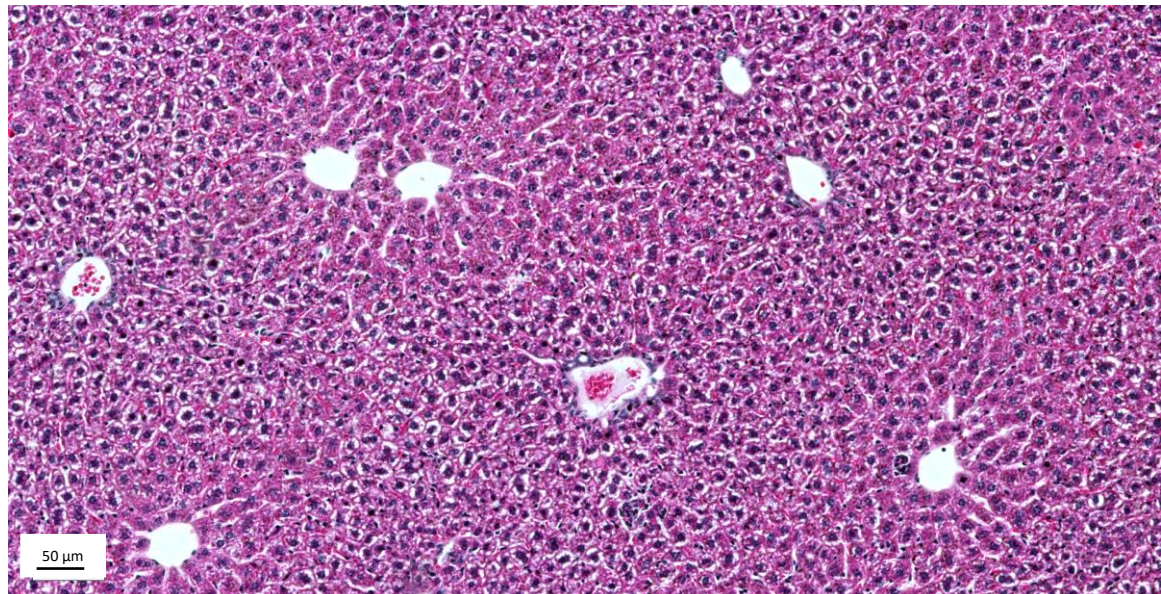



# NCD-5

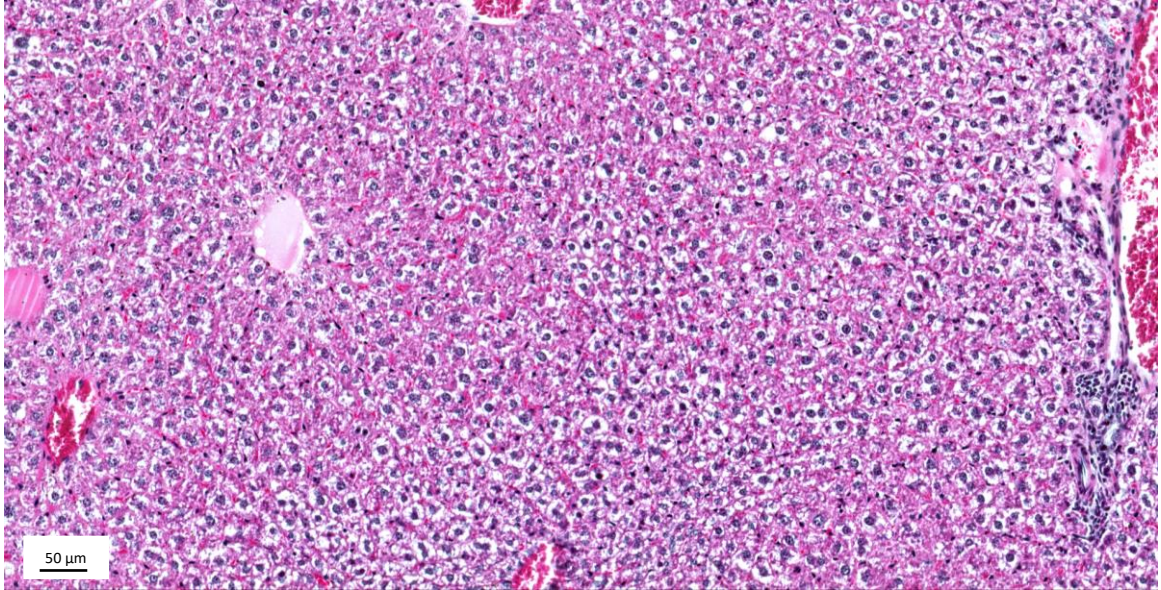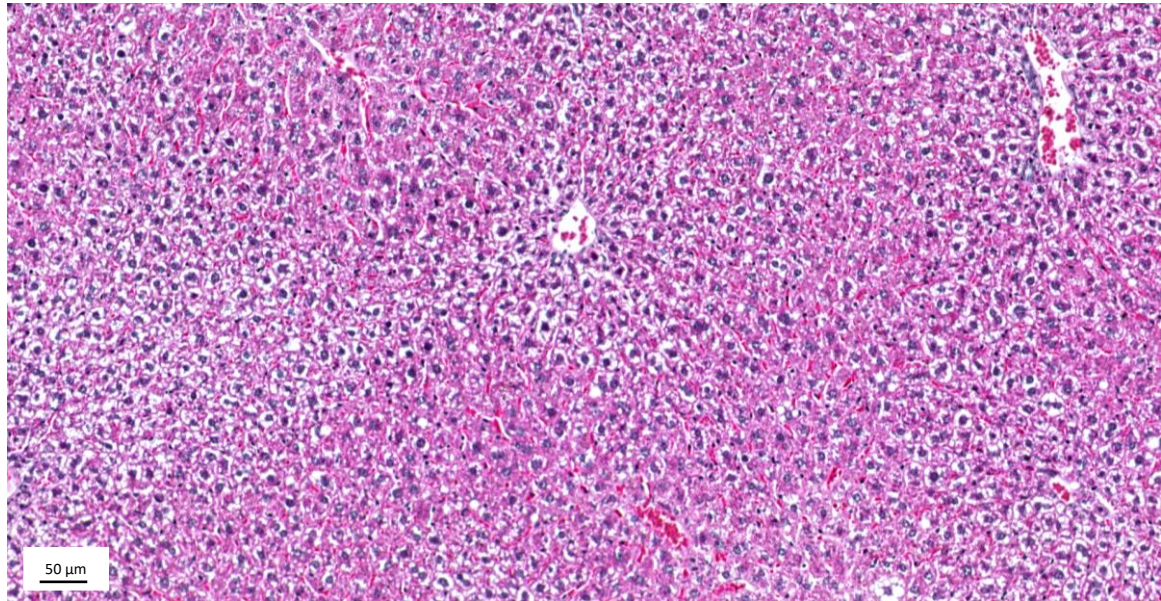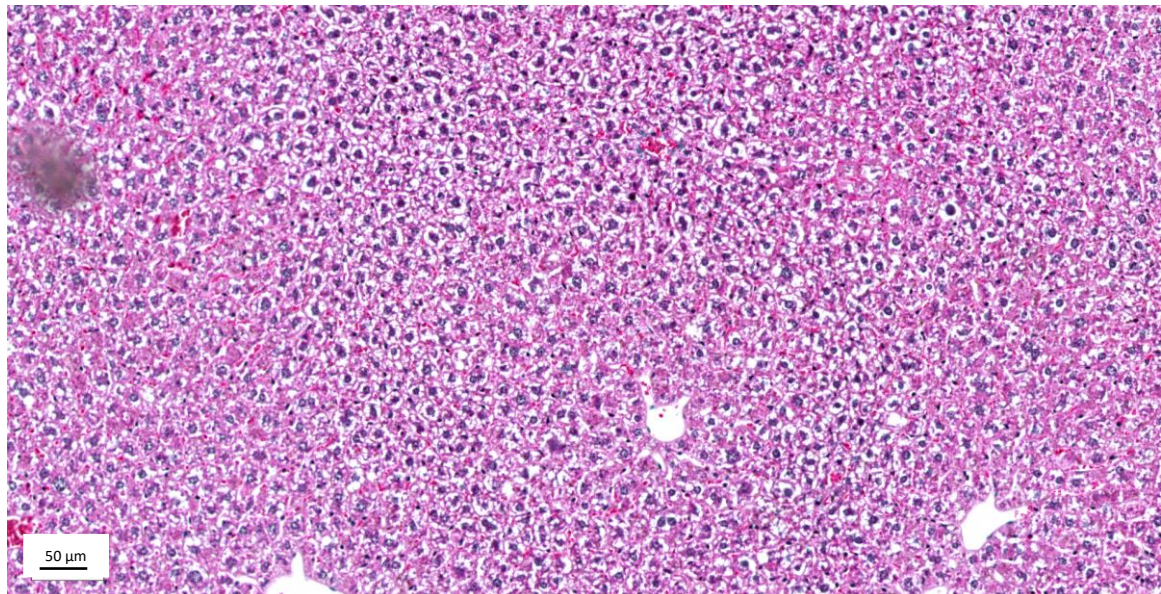



# NCD-6

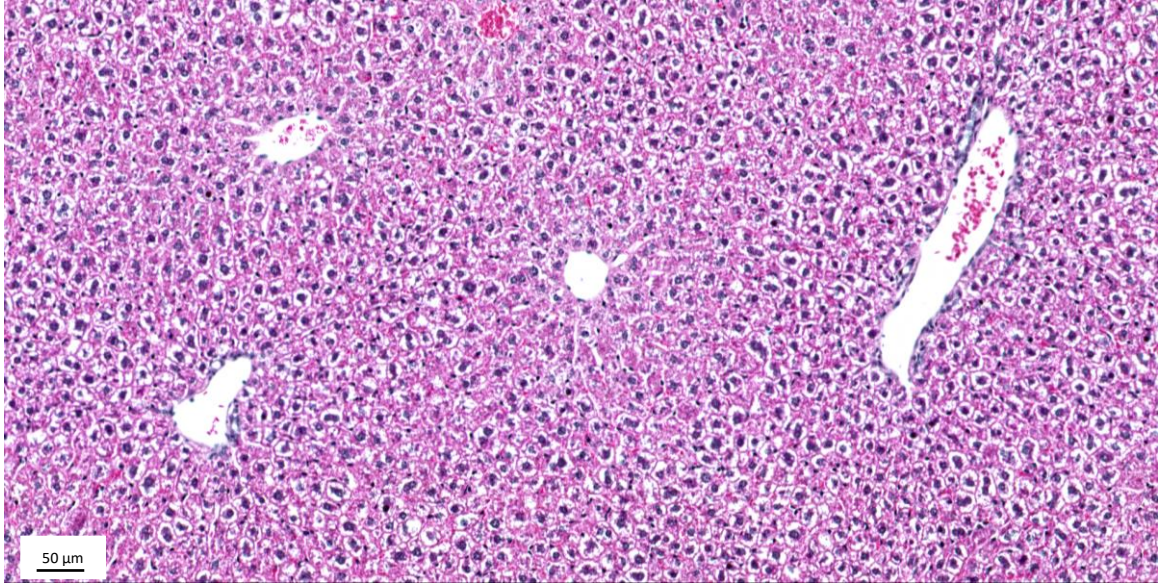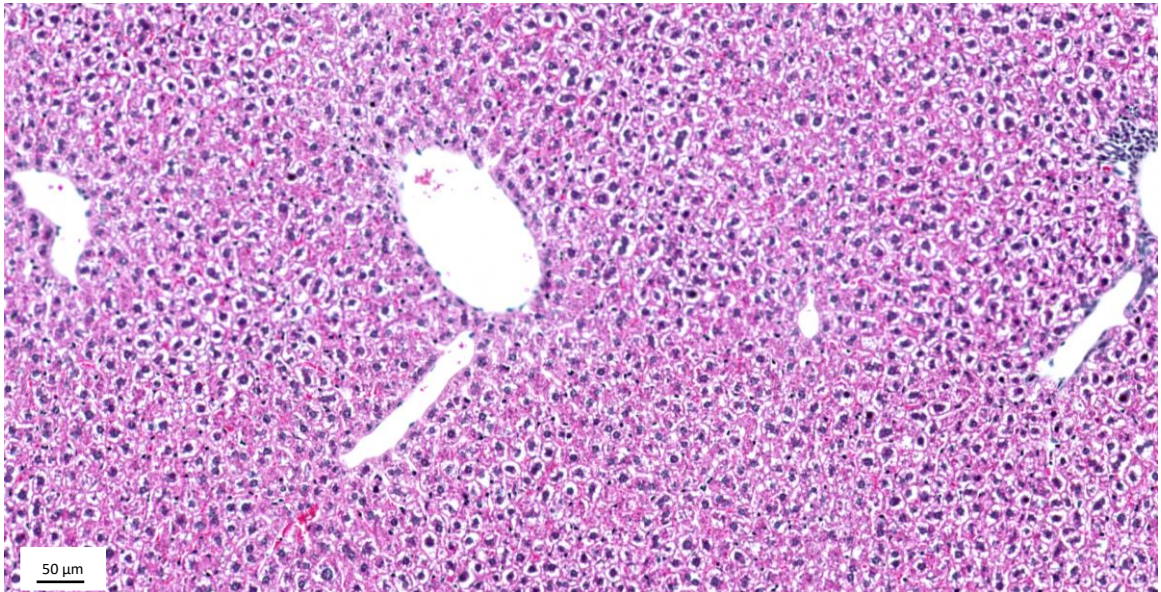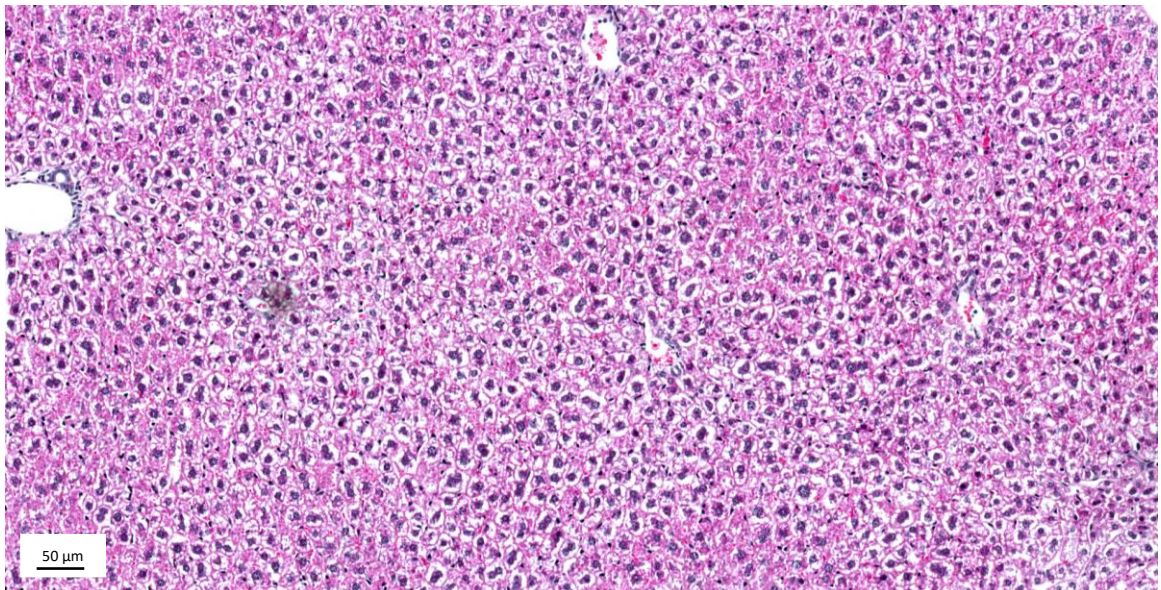



# NCD-7

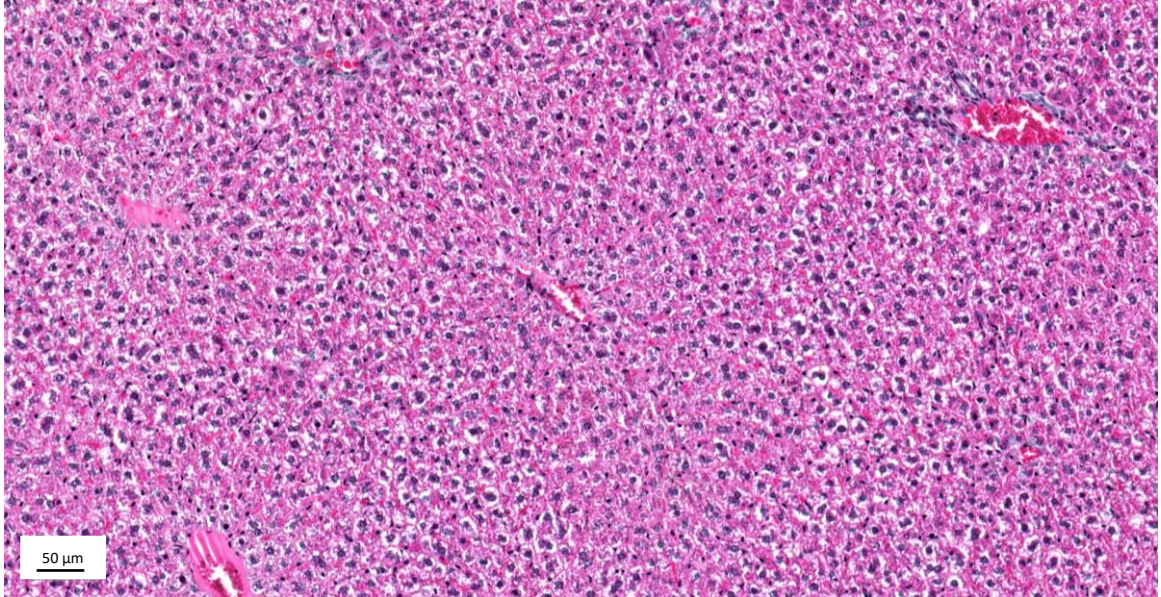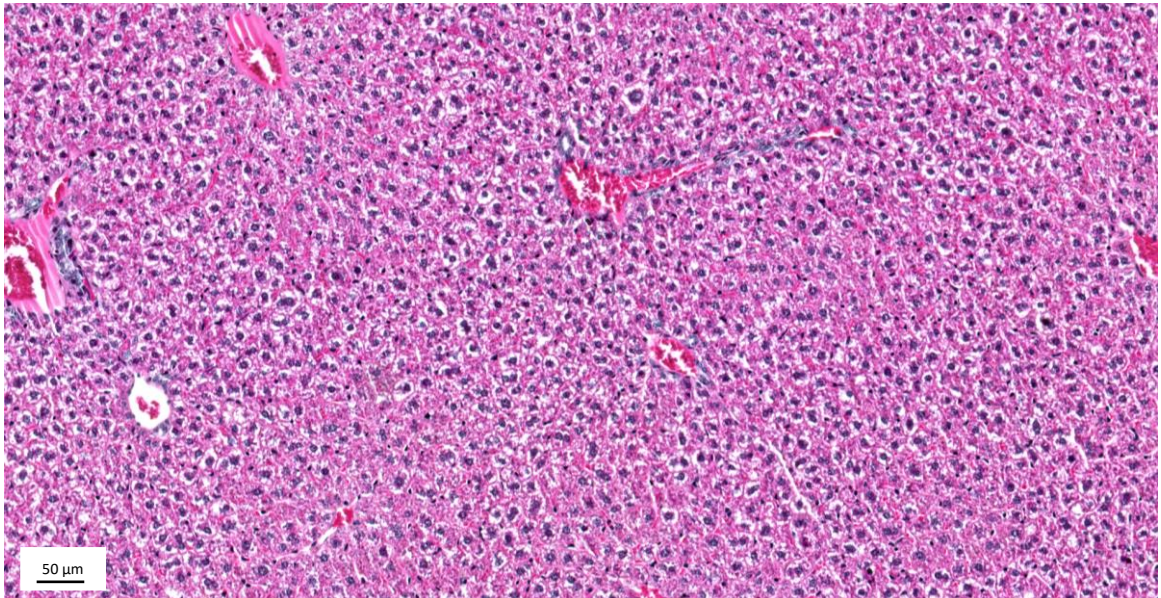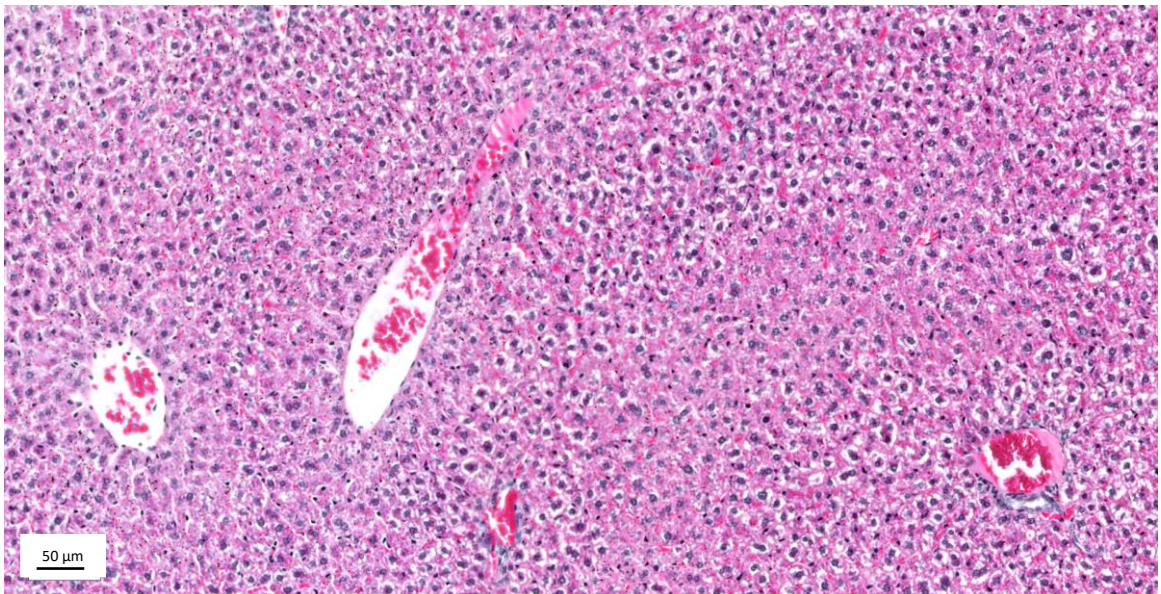



**H&E Staining**

**HFHCD group**

(15 mice were included)



# HFHCD-1

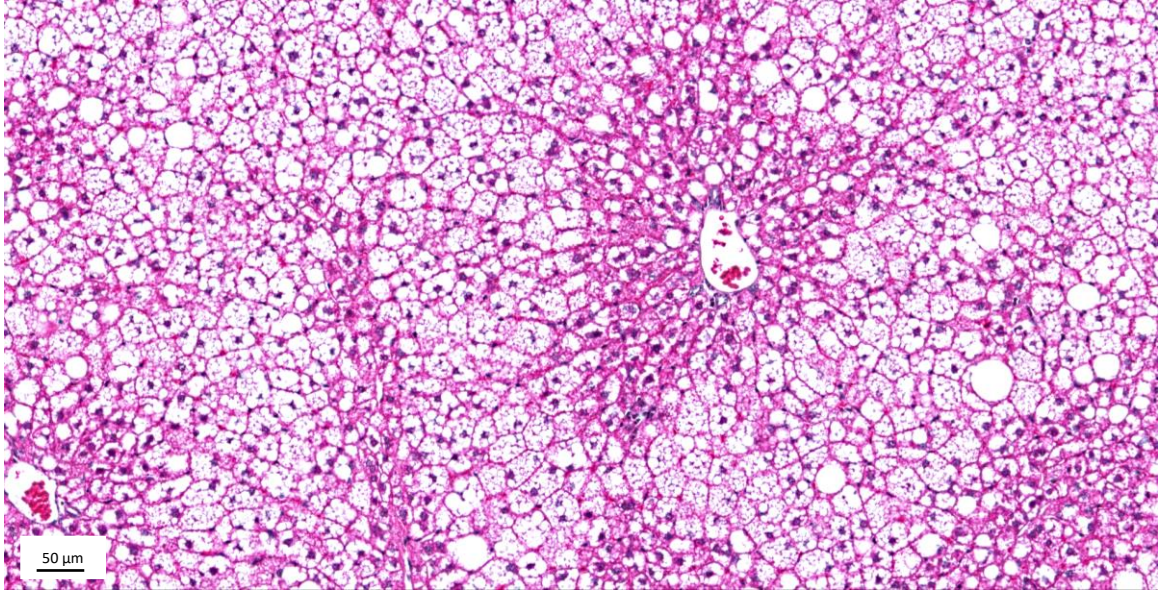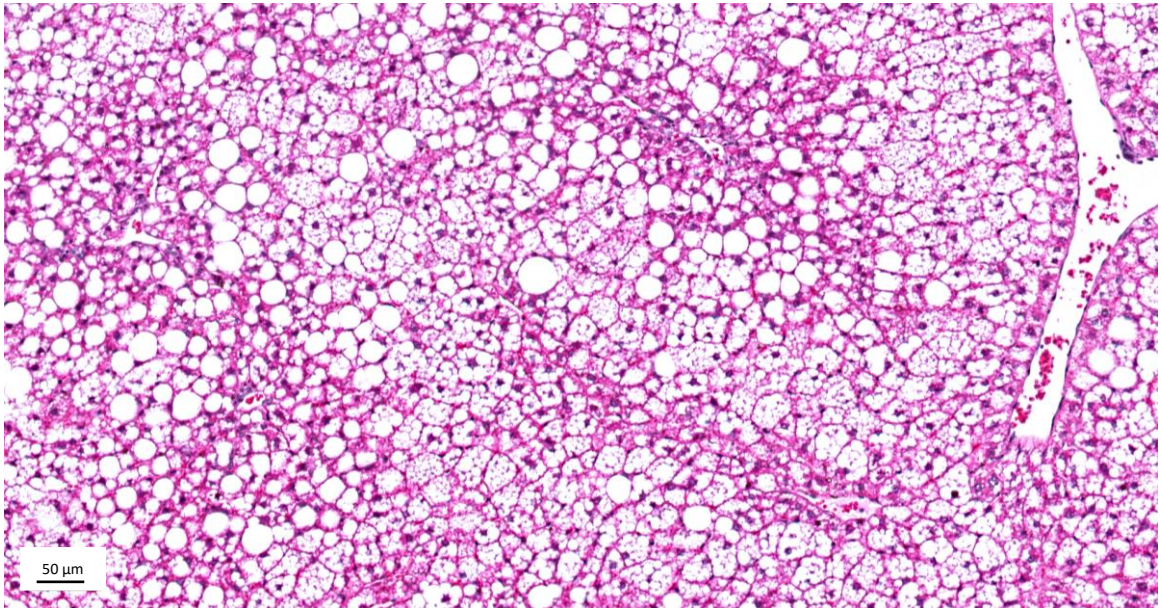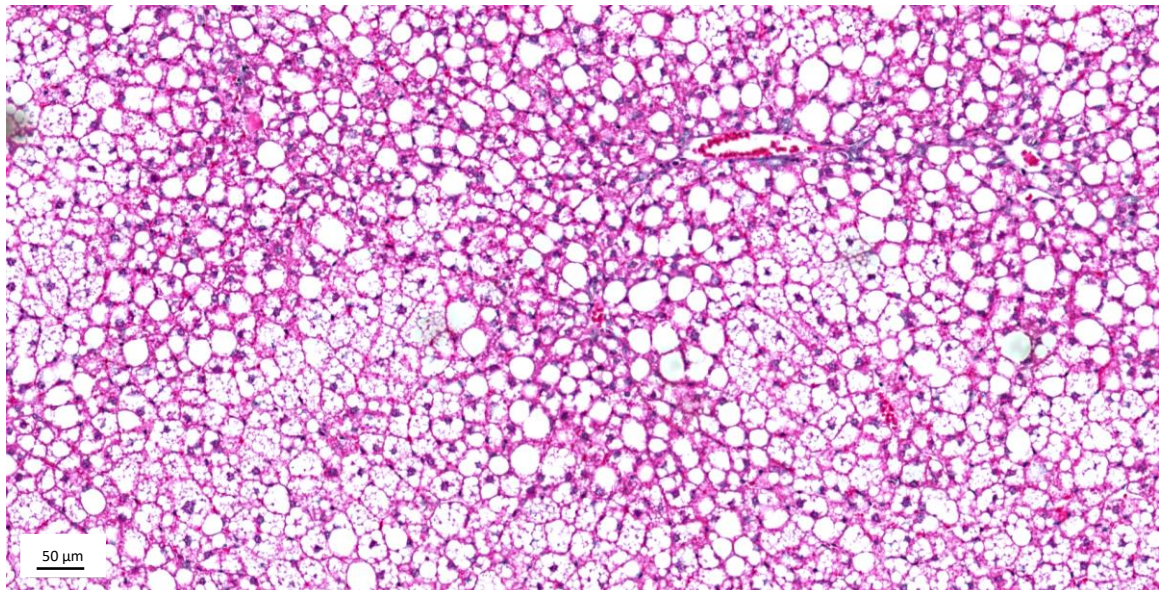



# HFHCD-2

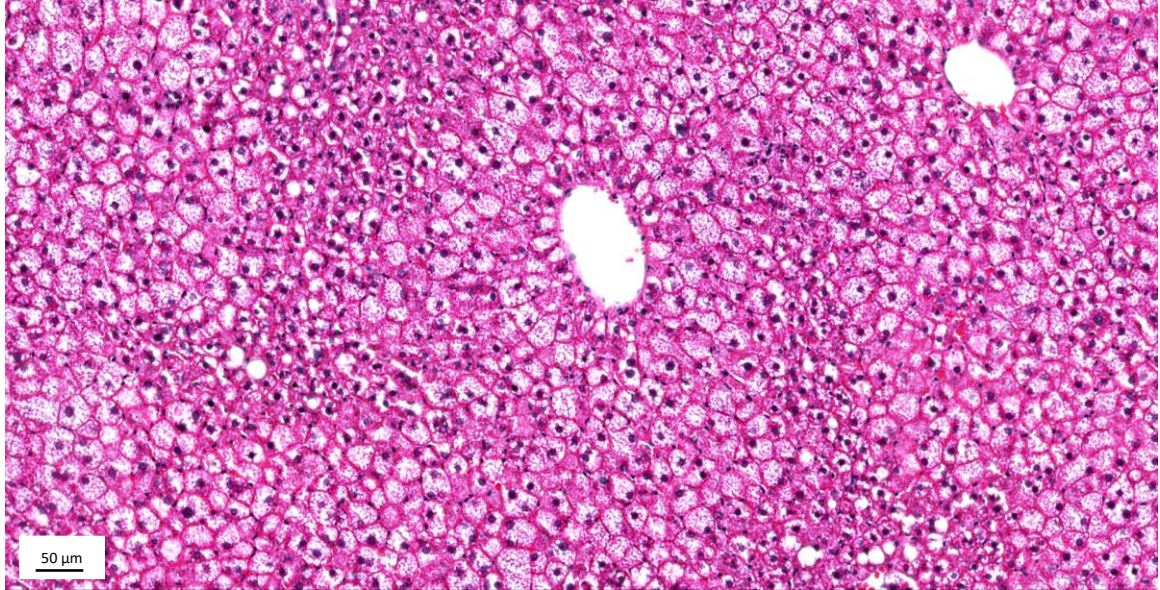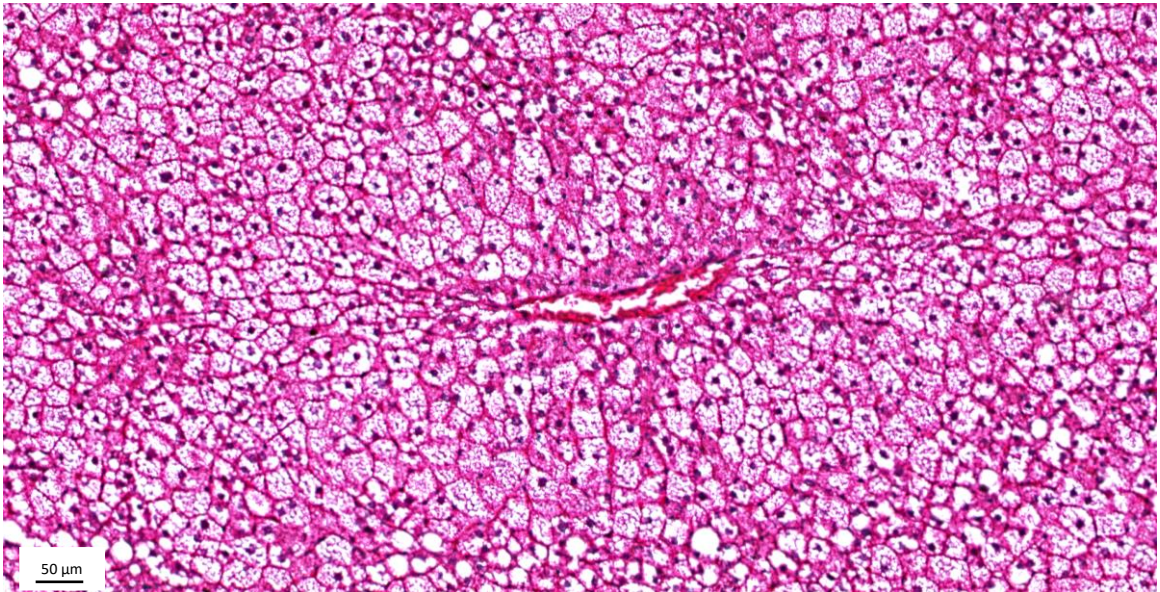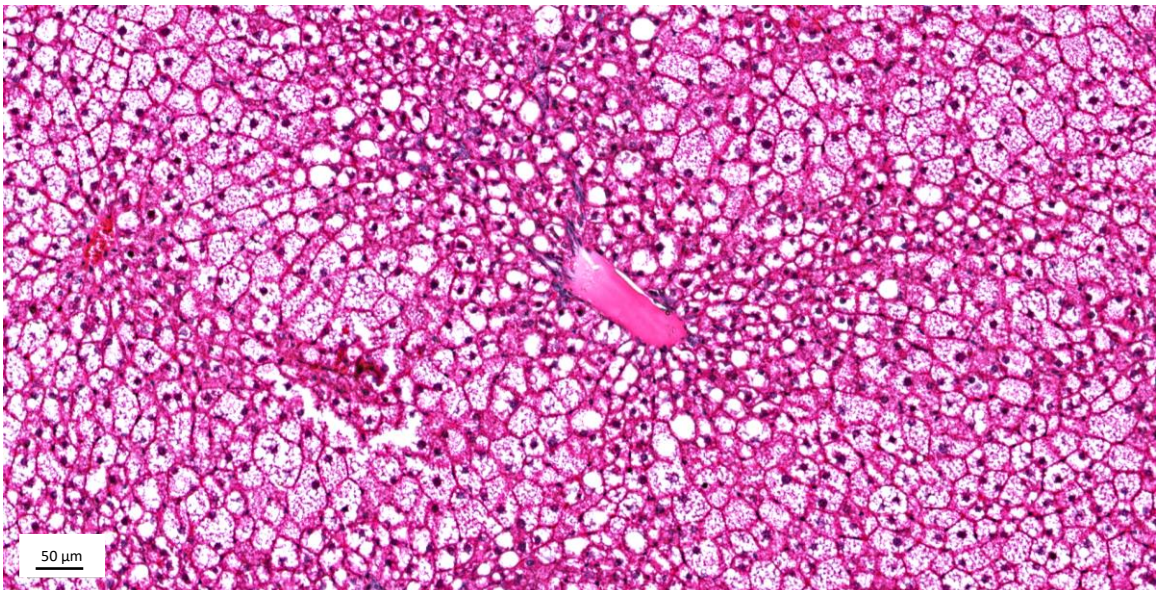



# HFHCD-3

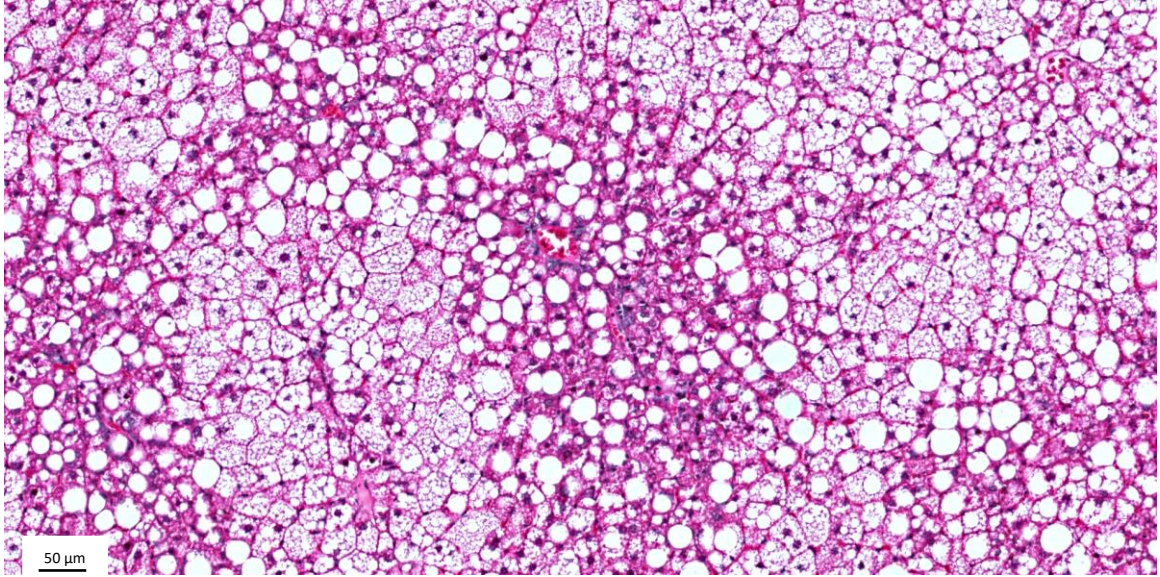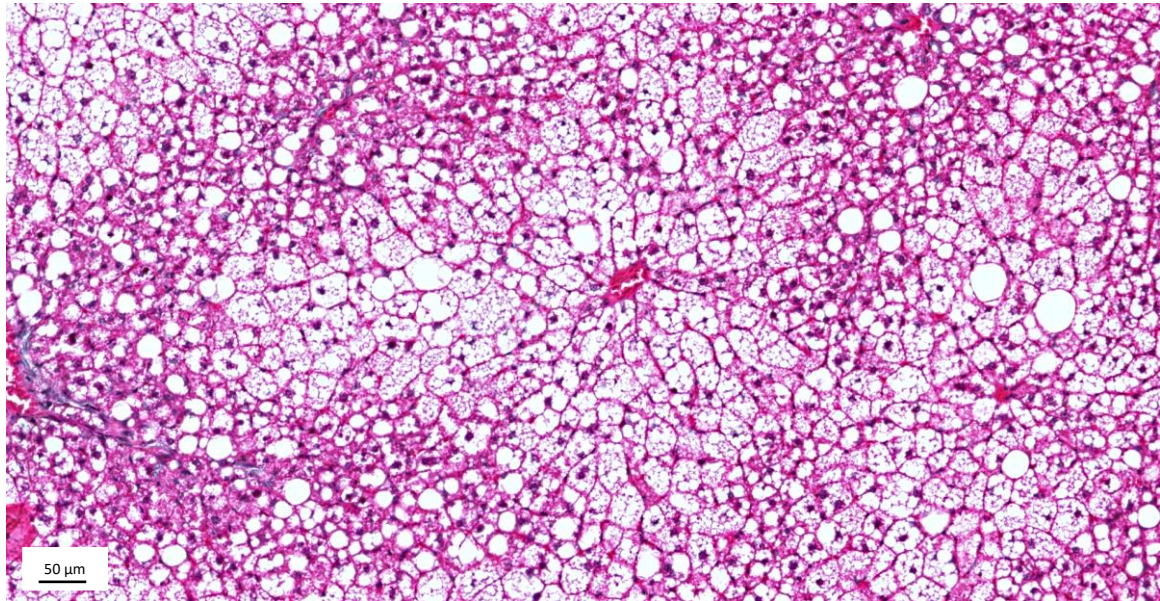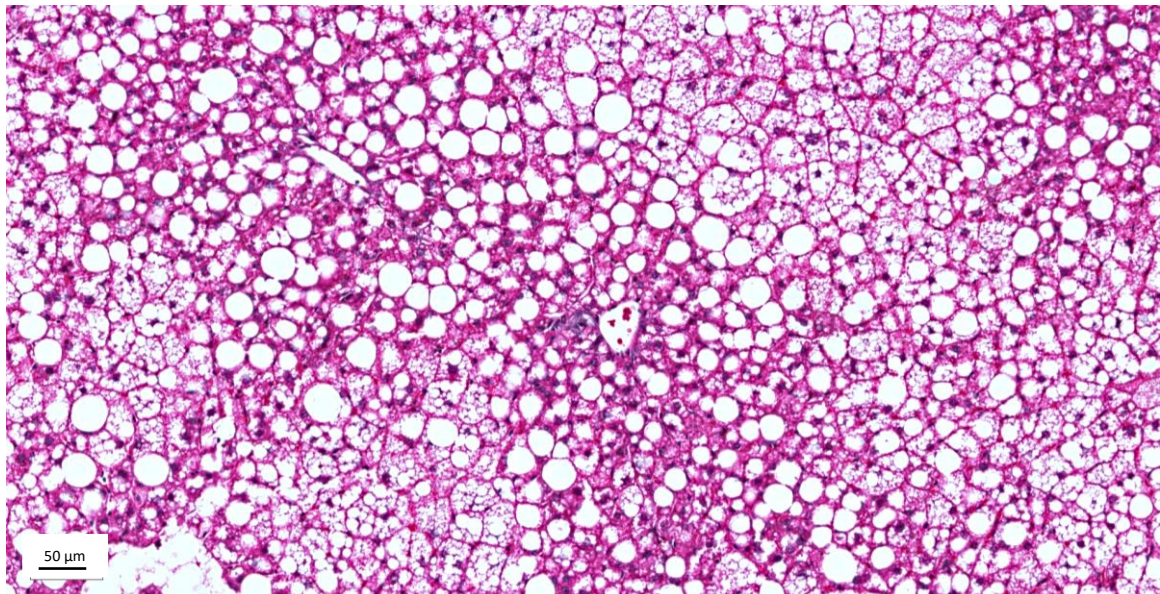



# HFHCD-4

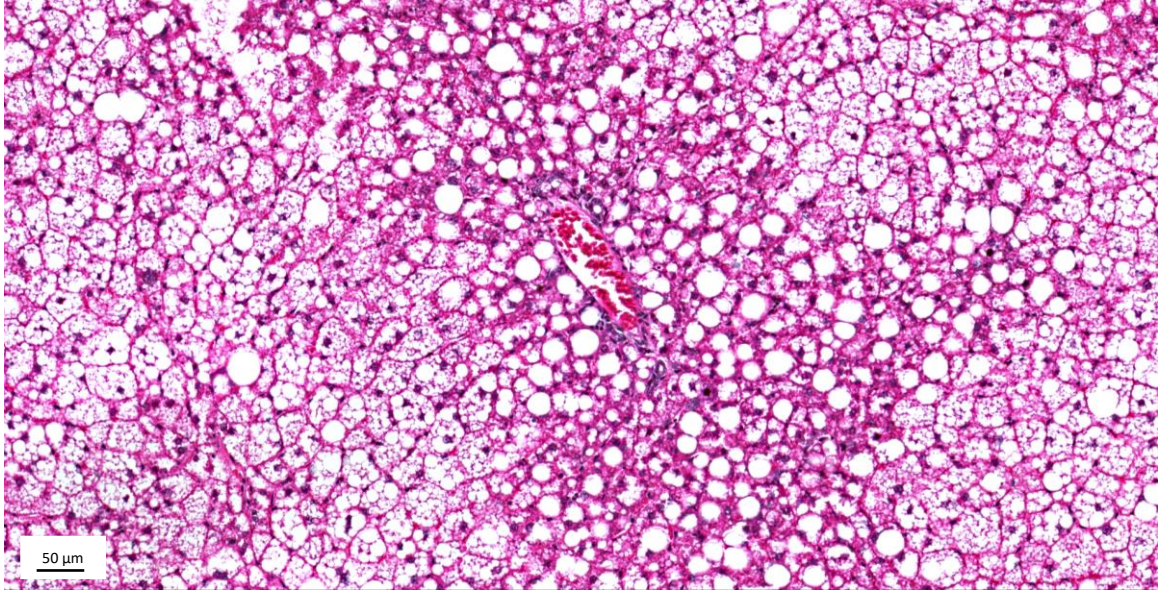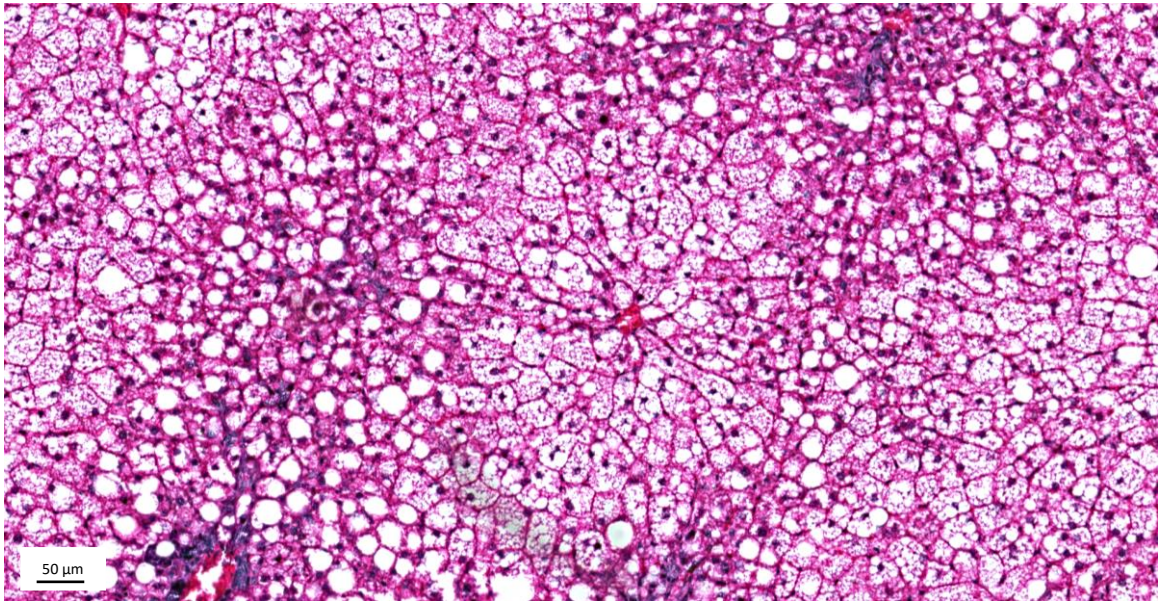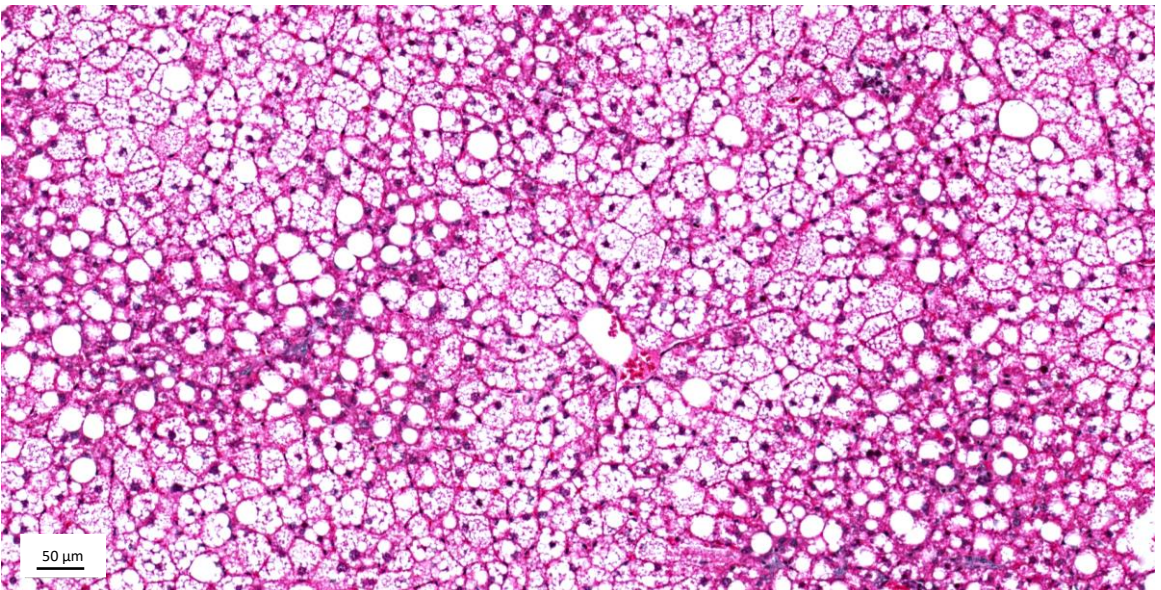



# HFHCD-5

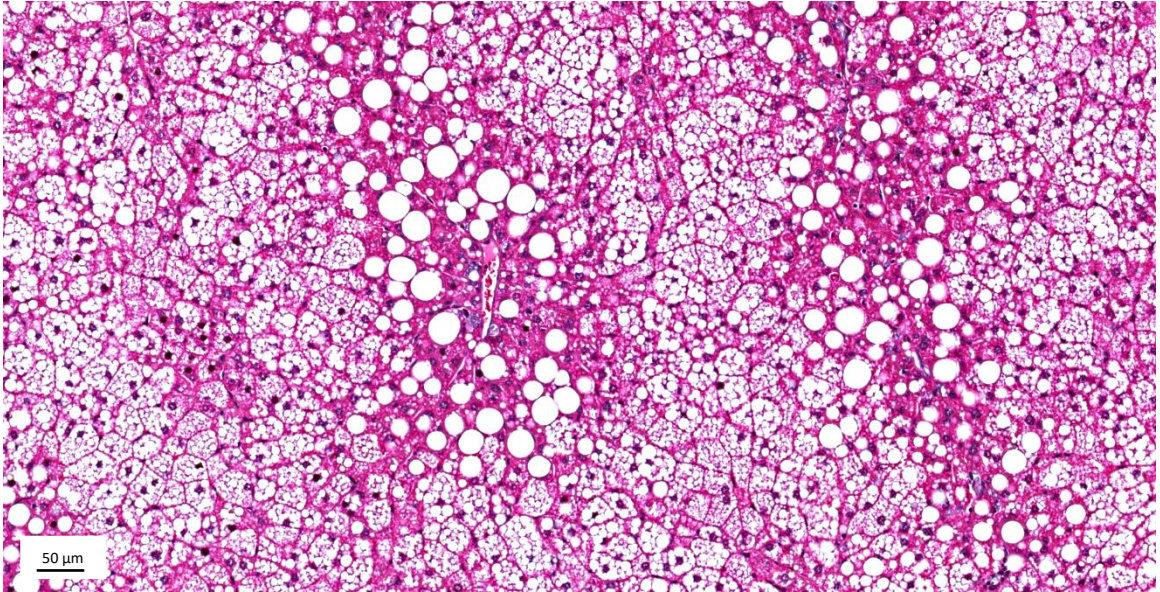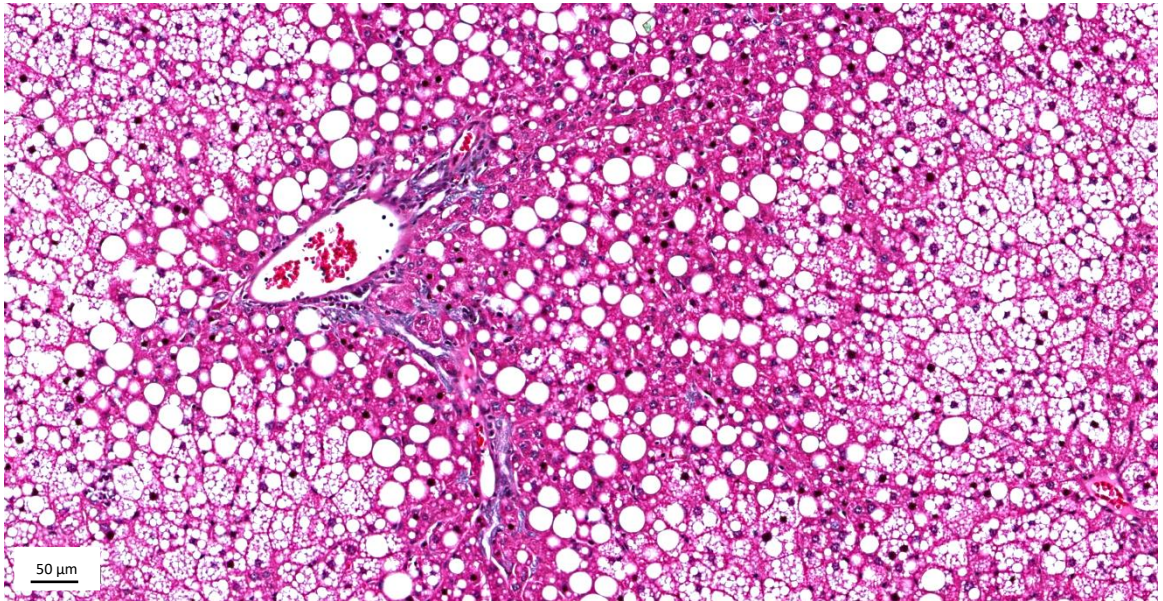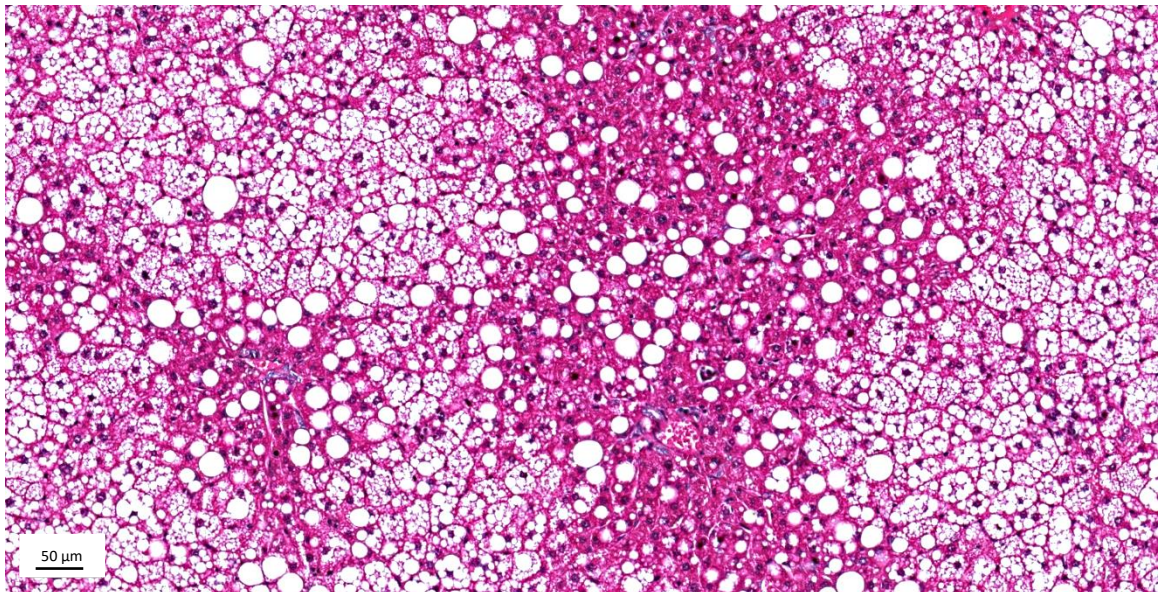



# HFHCD-6

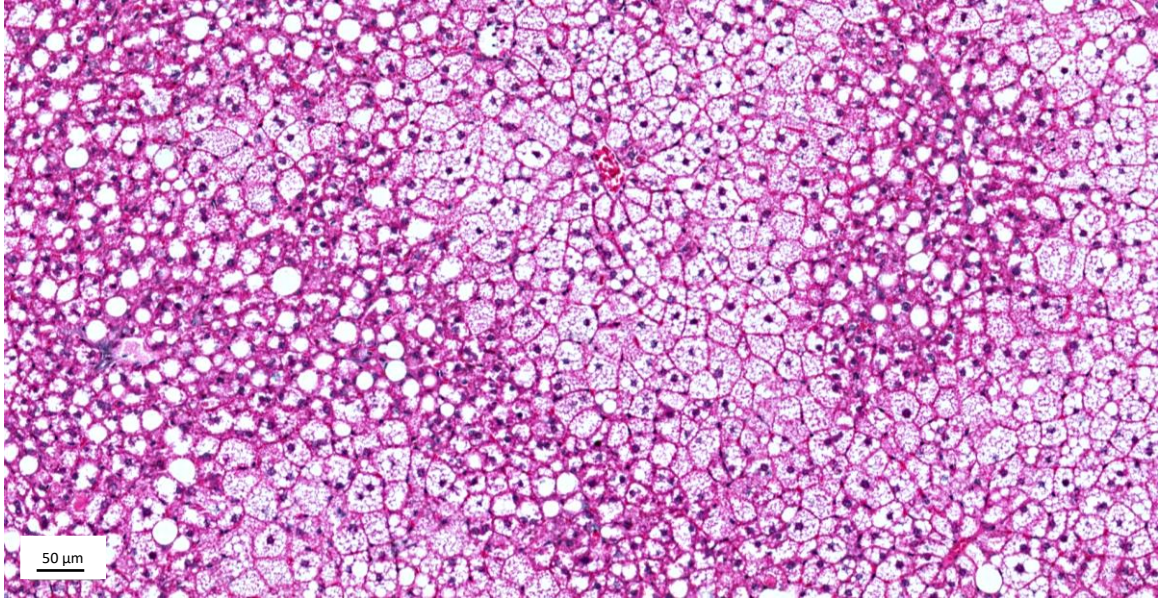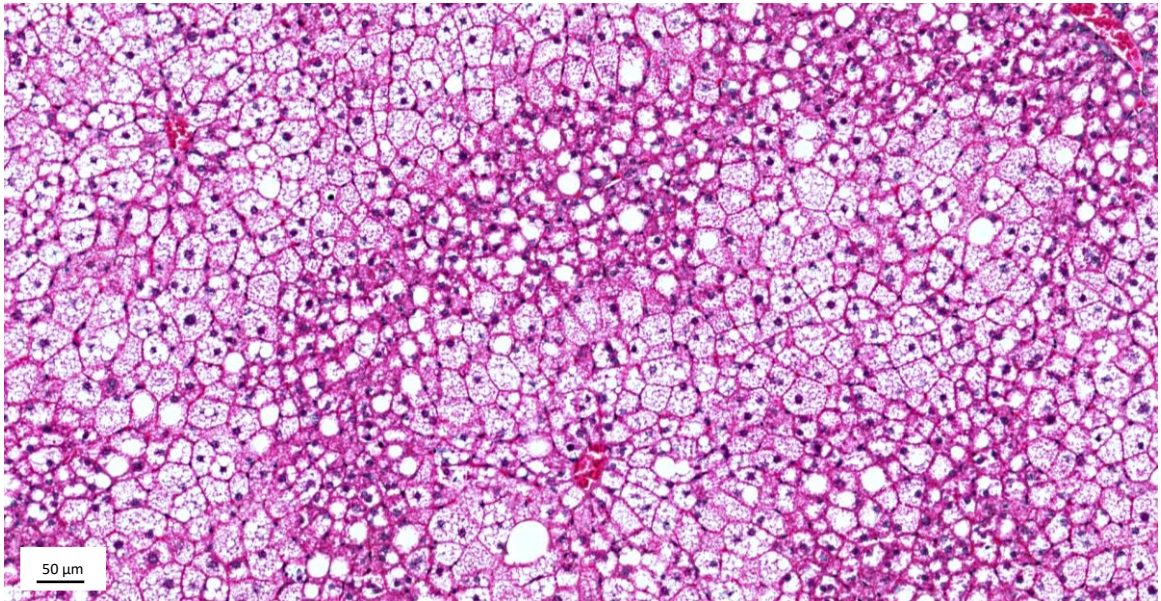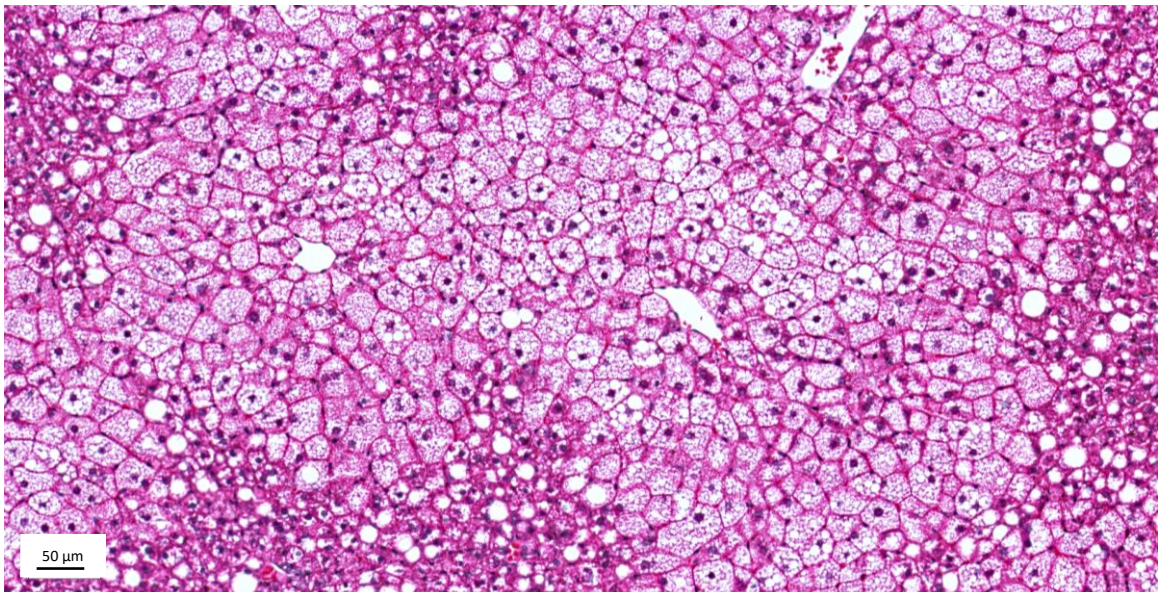



# HFHCD-7

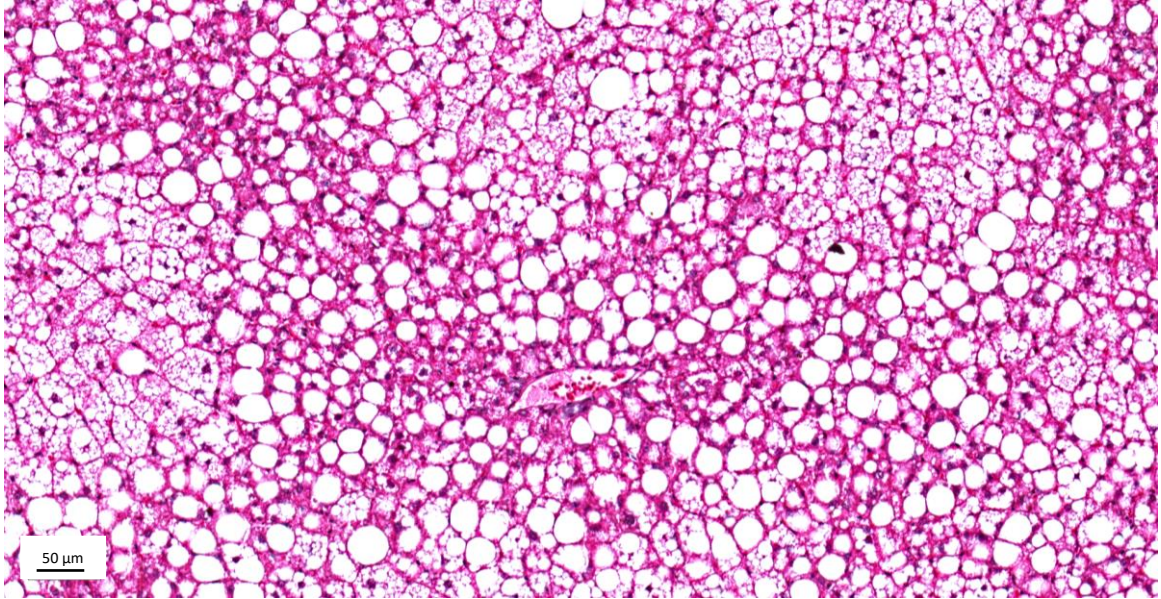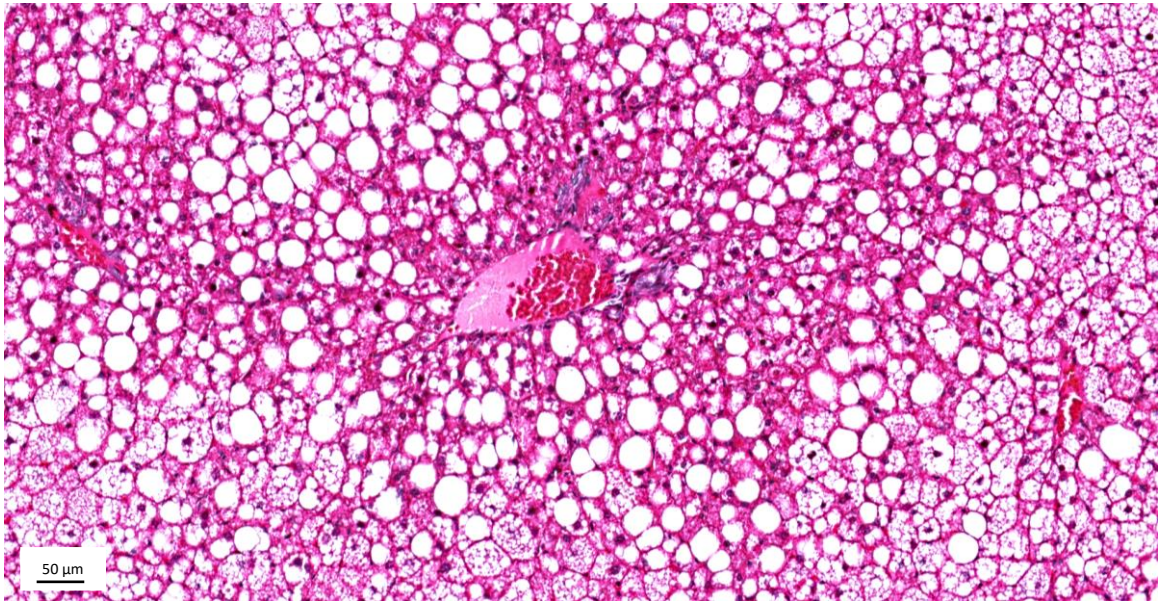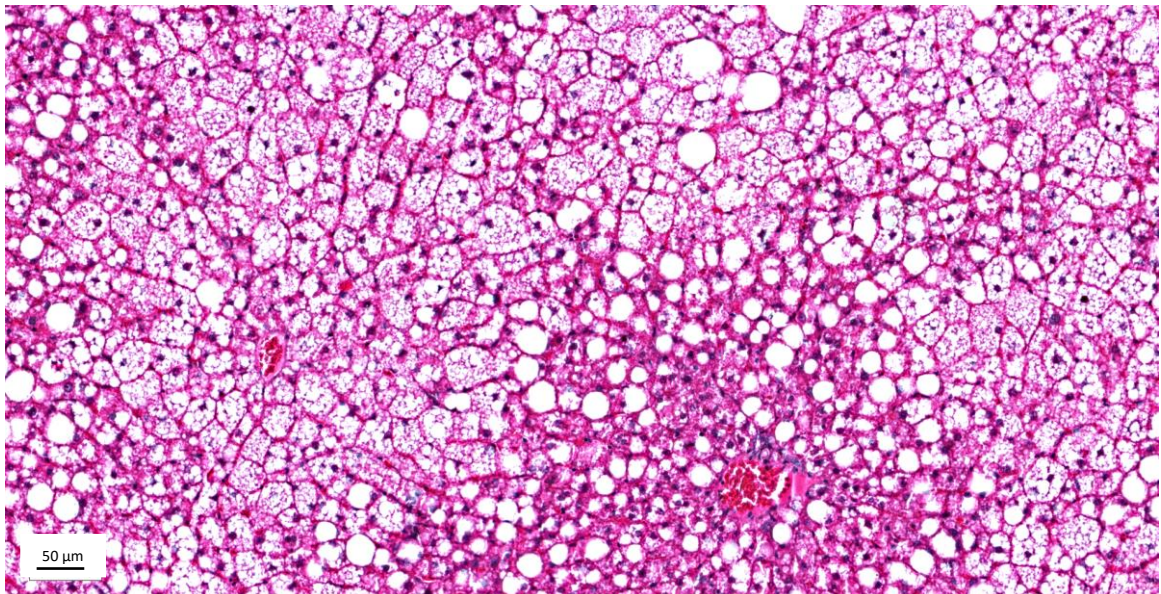



# HFHCD-8

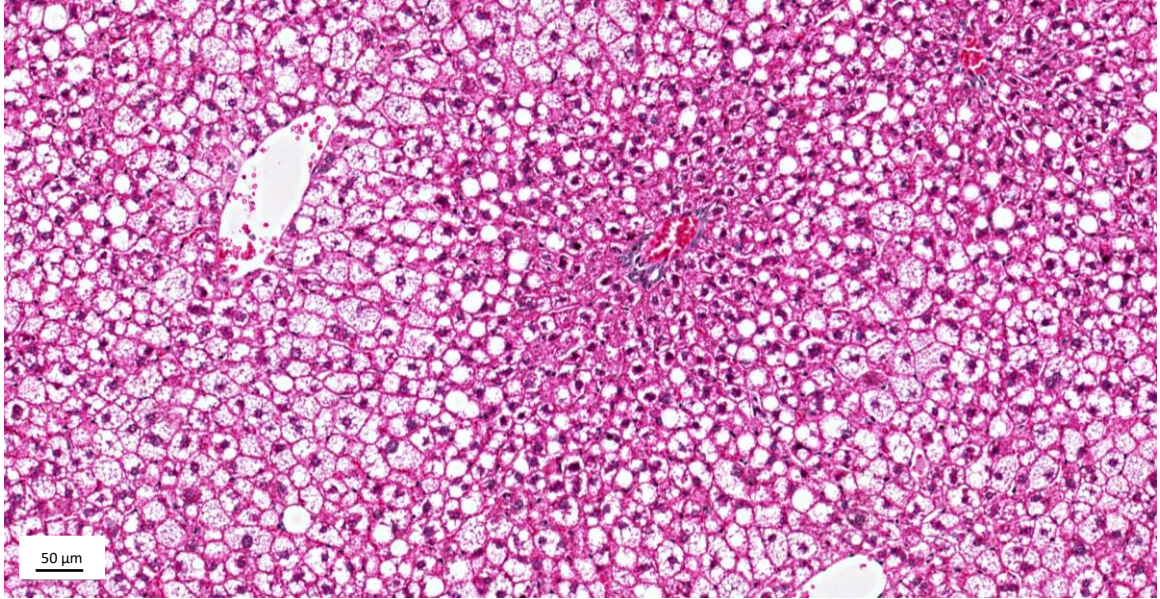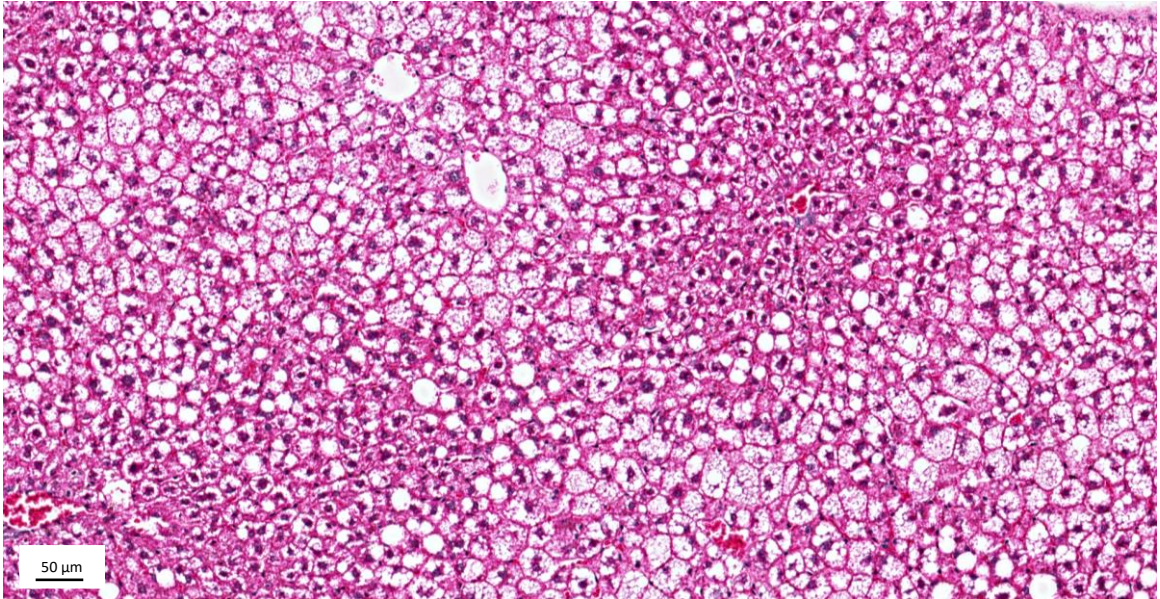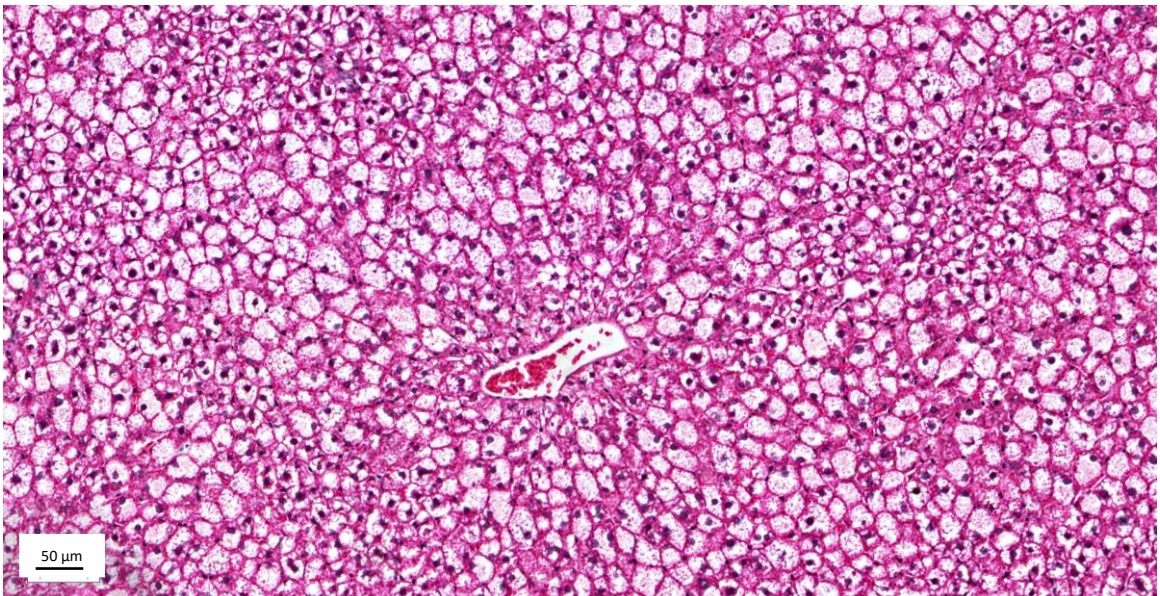



# HFHCD-9

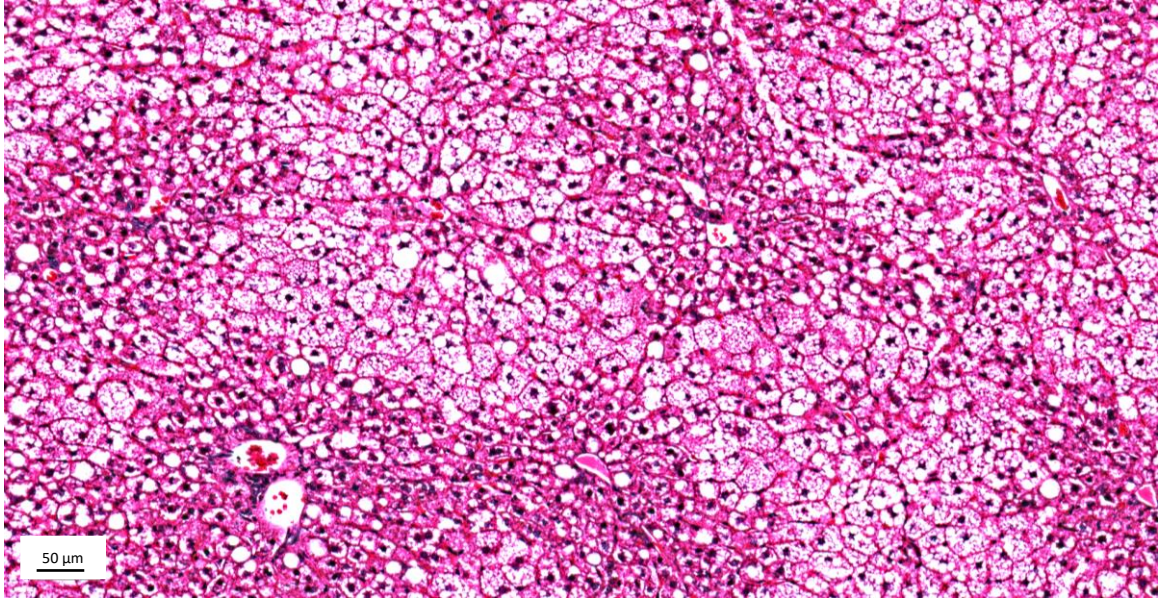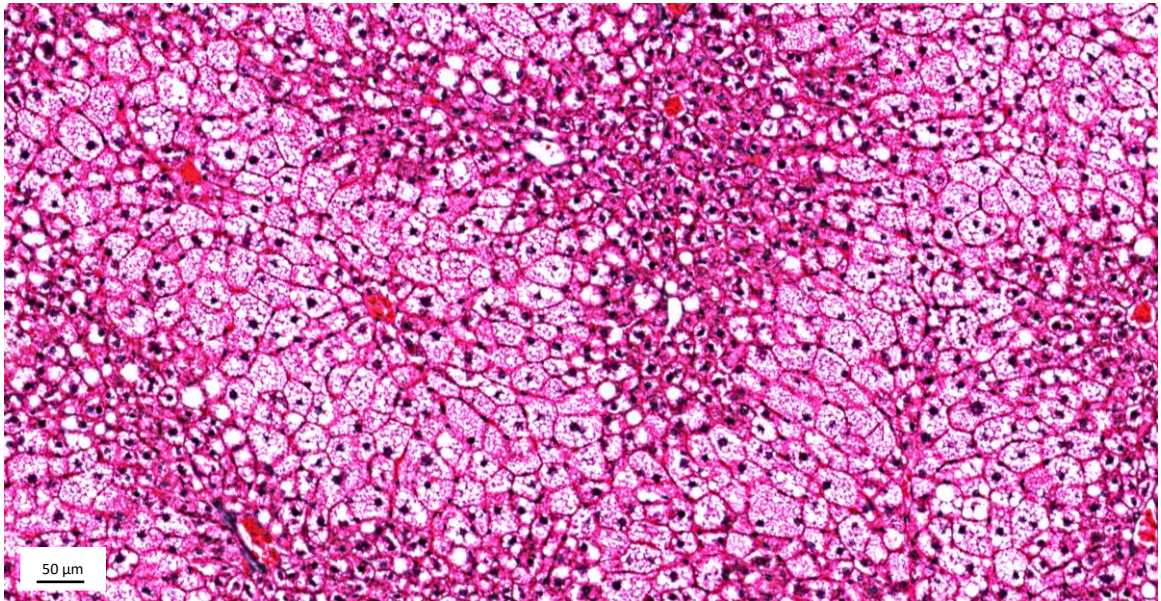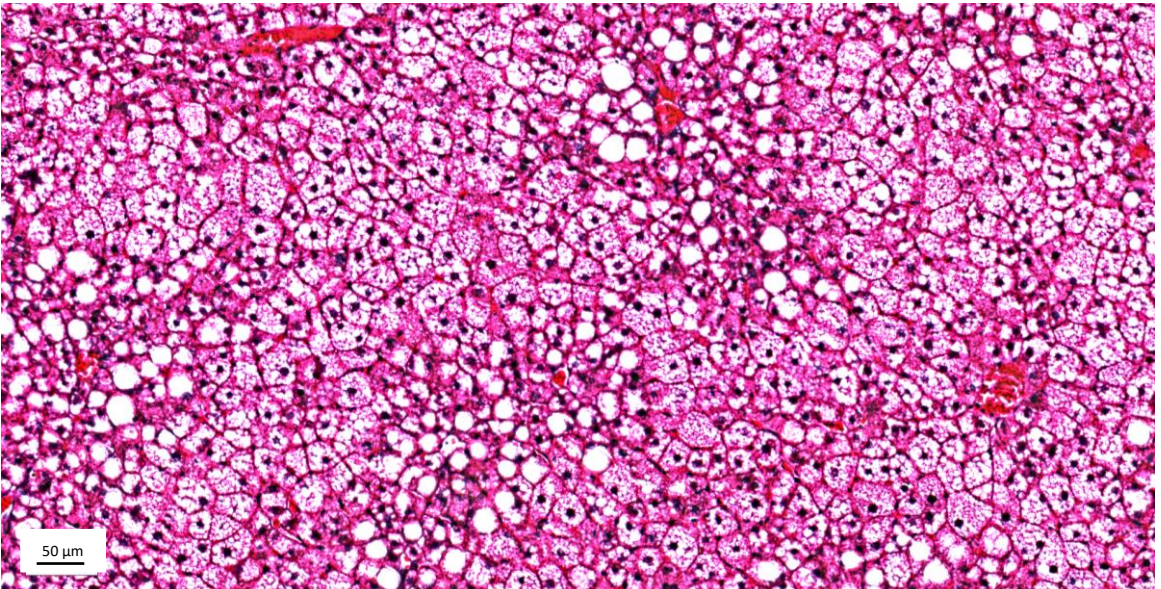



# HFHCD-10

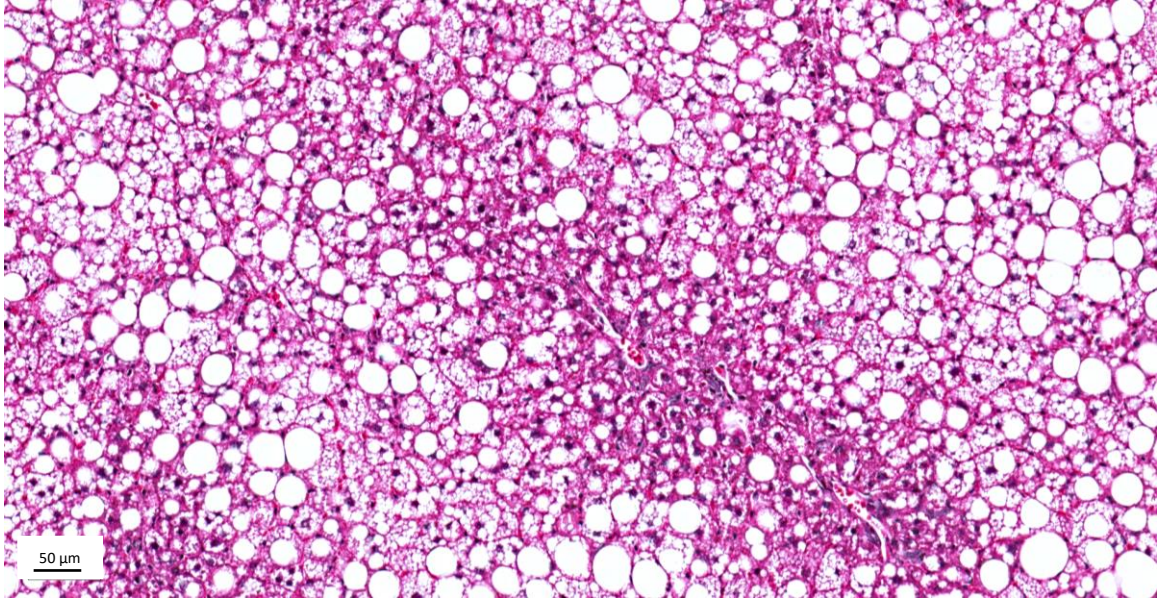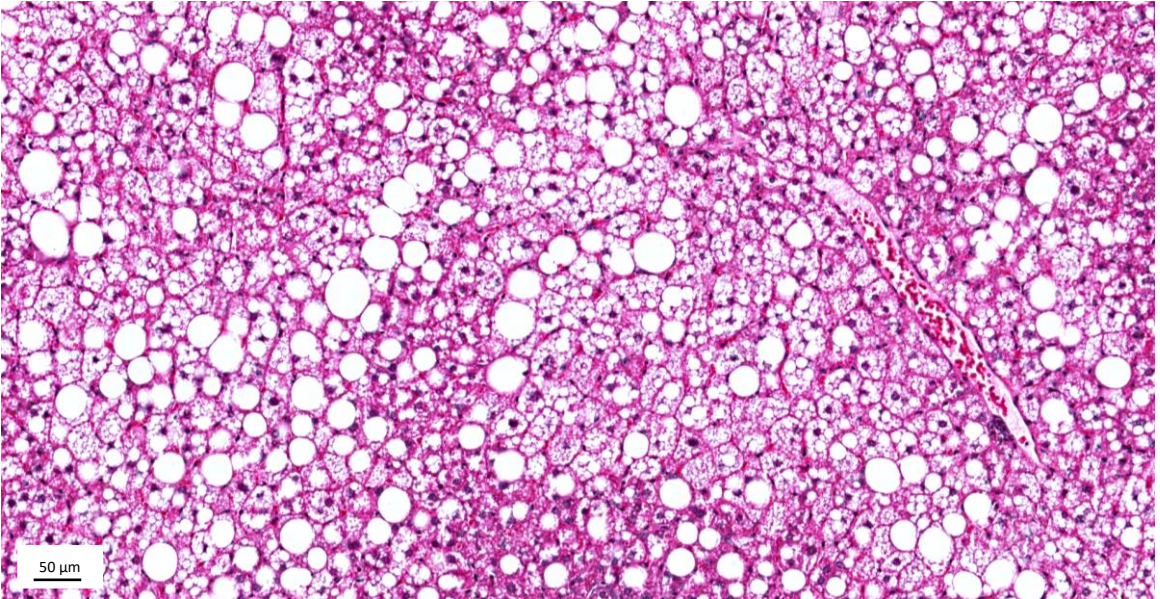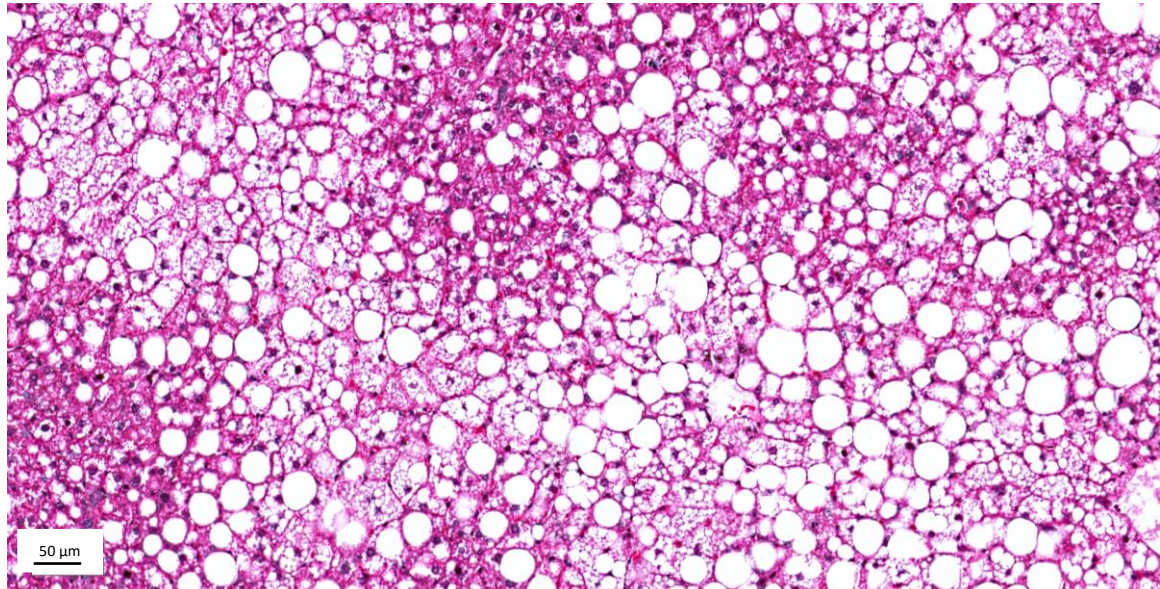



# HFHCD-11

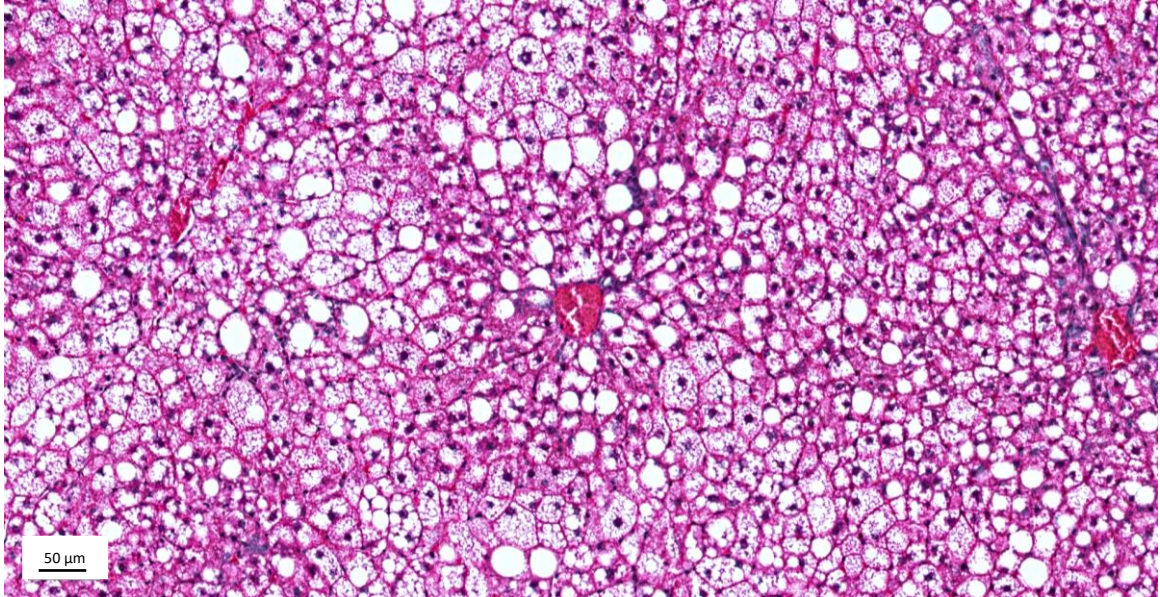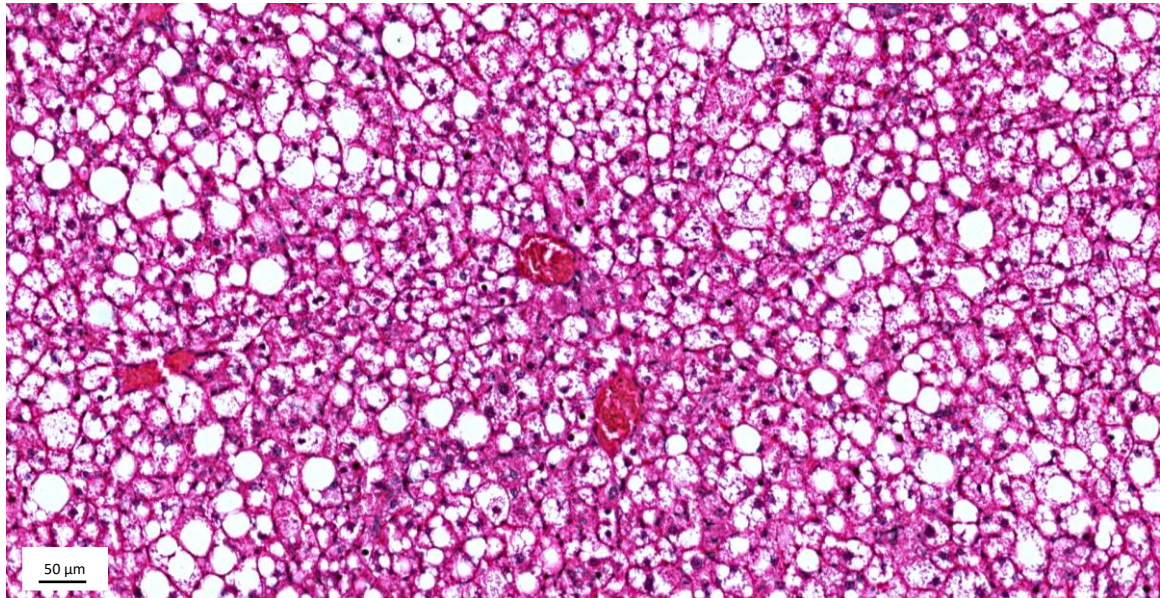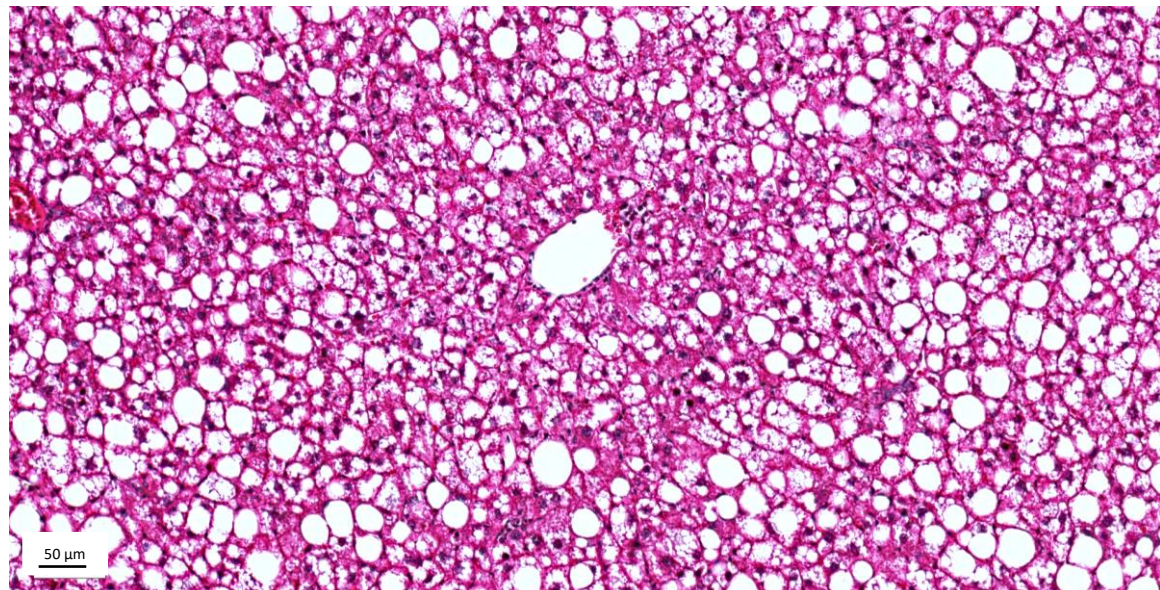



HFHCD-12

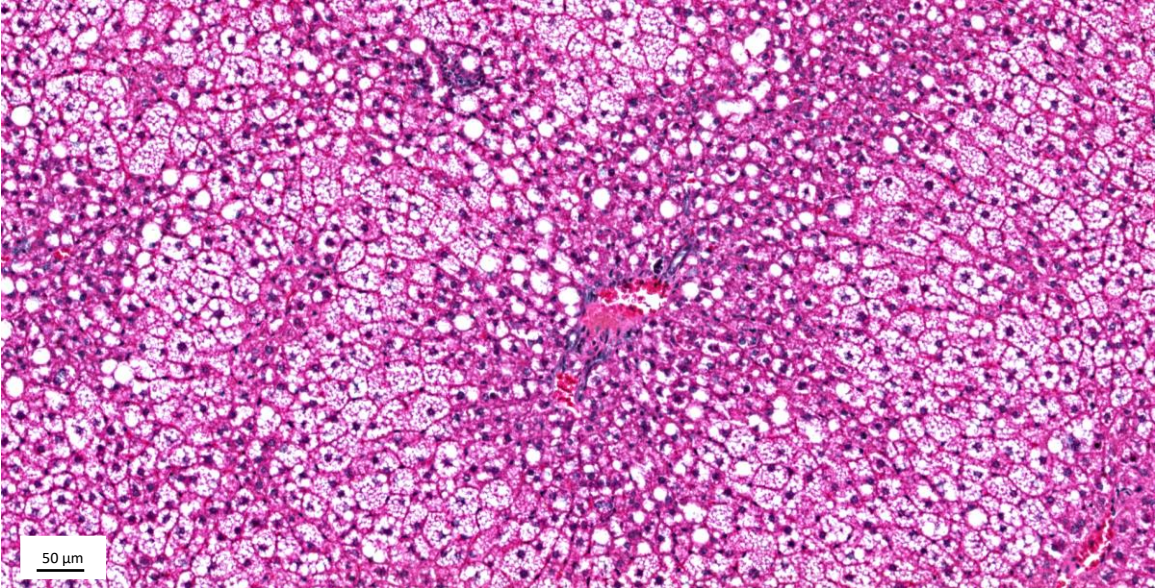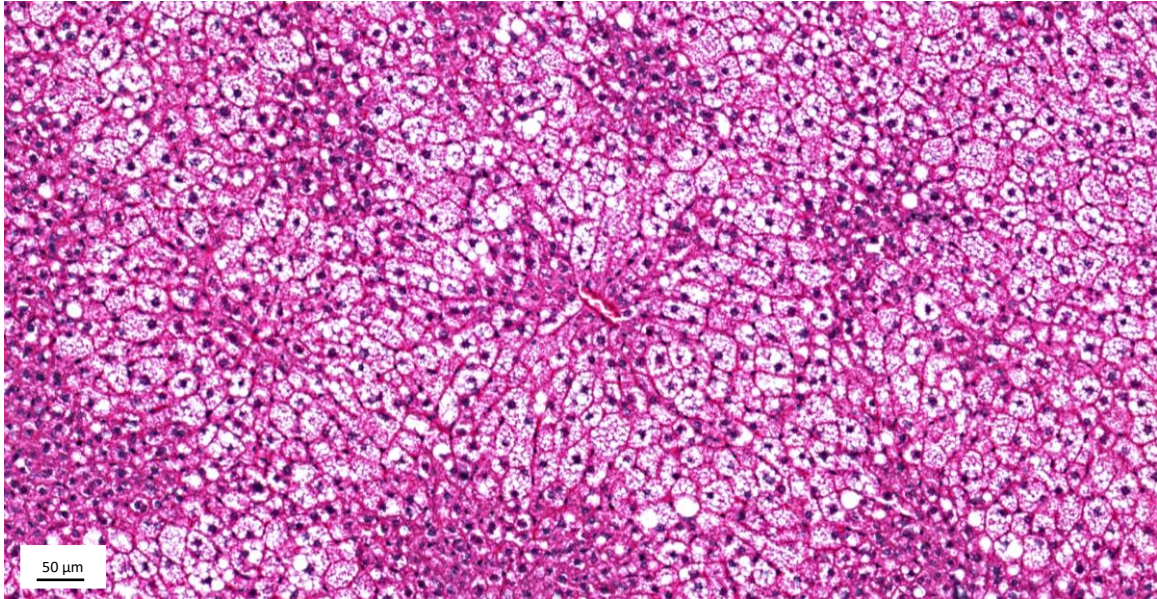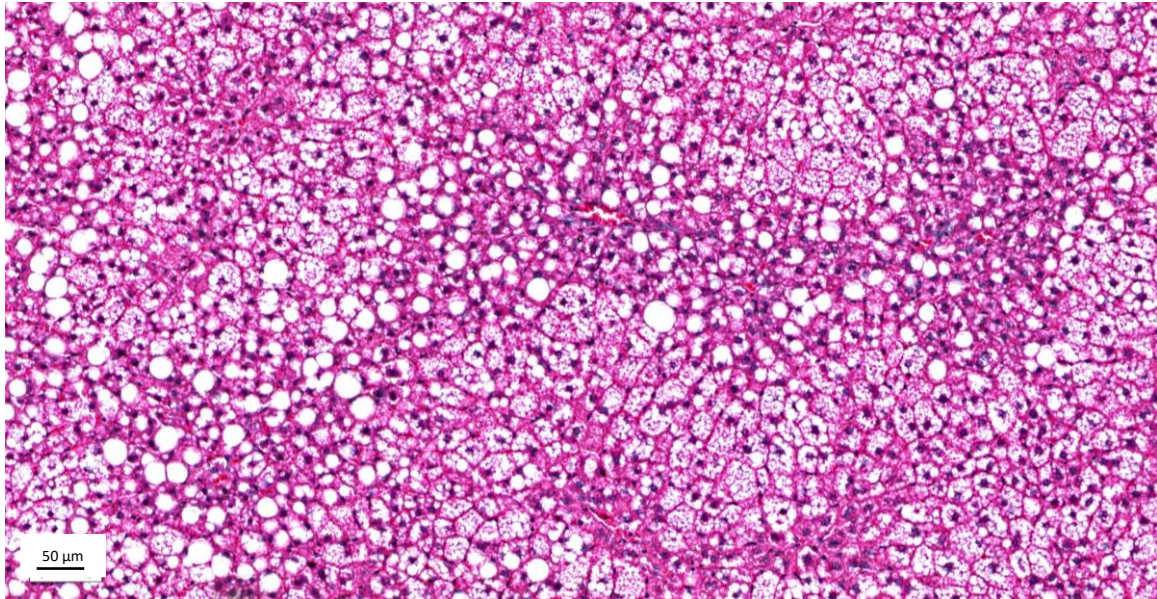



HFHCD-13

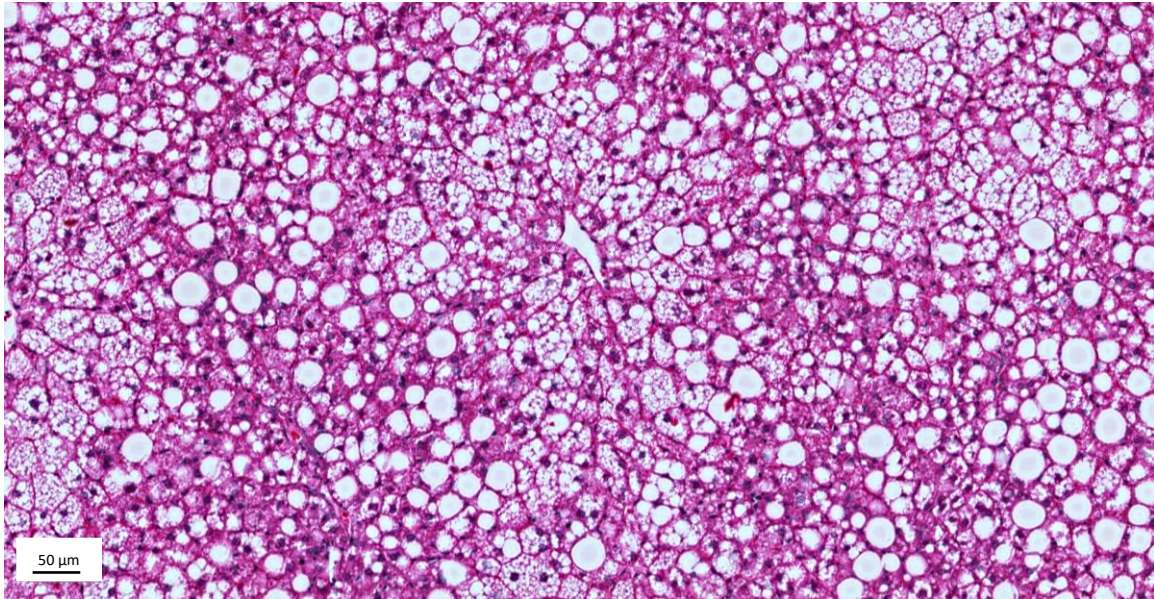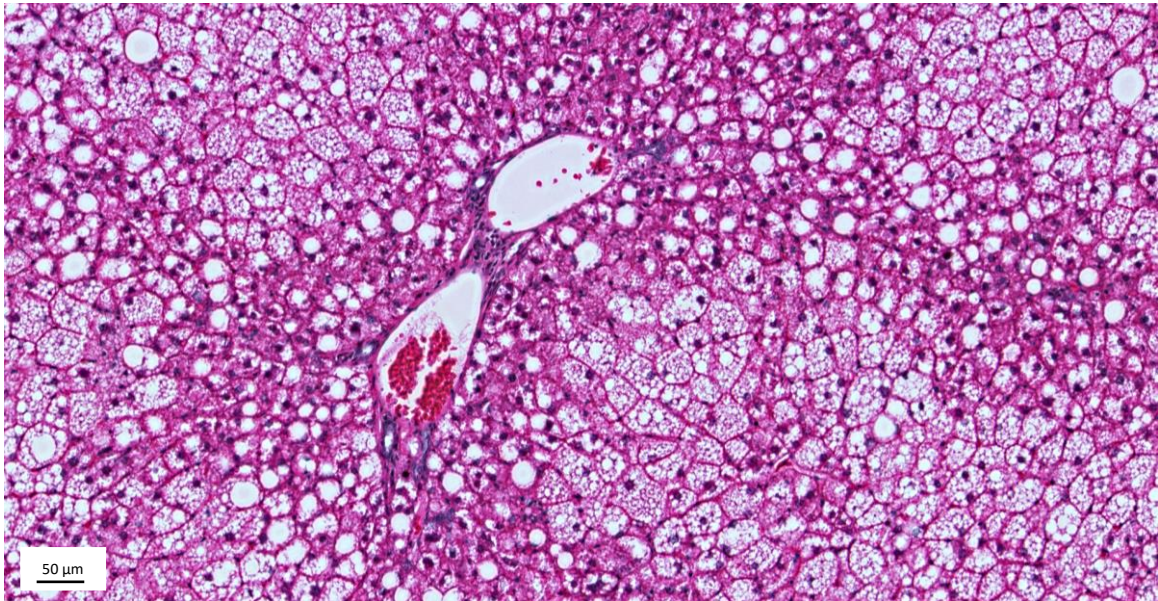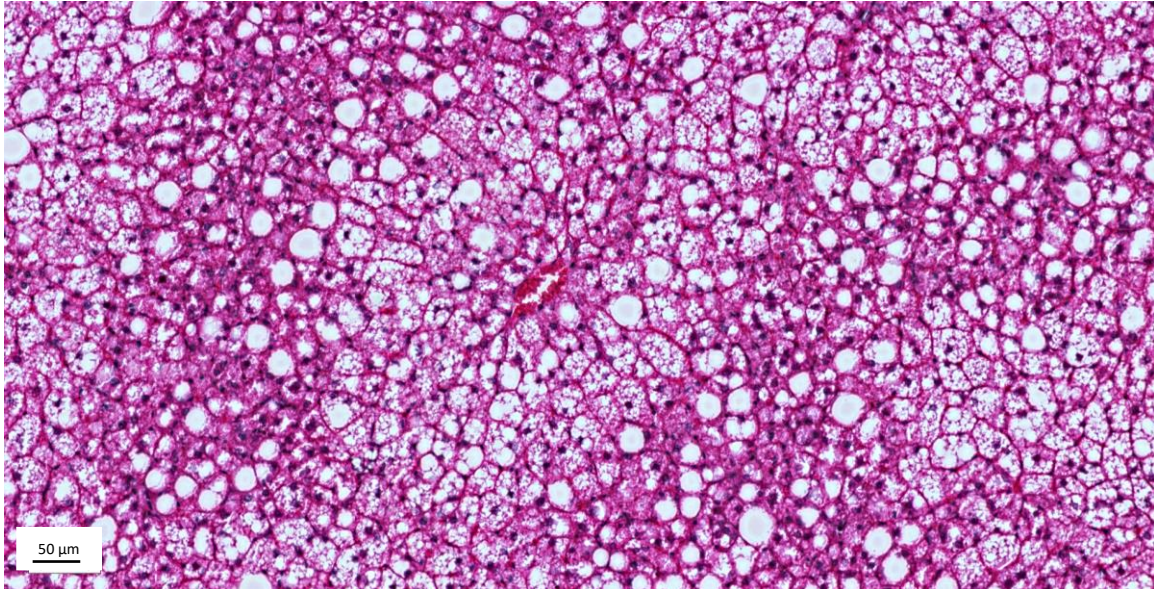



# HFHCD-14

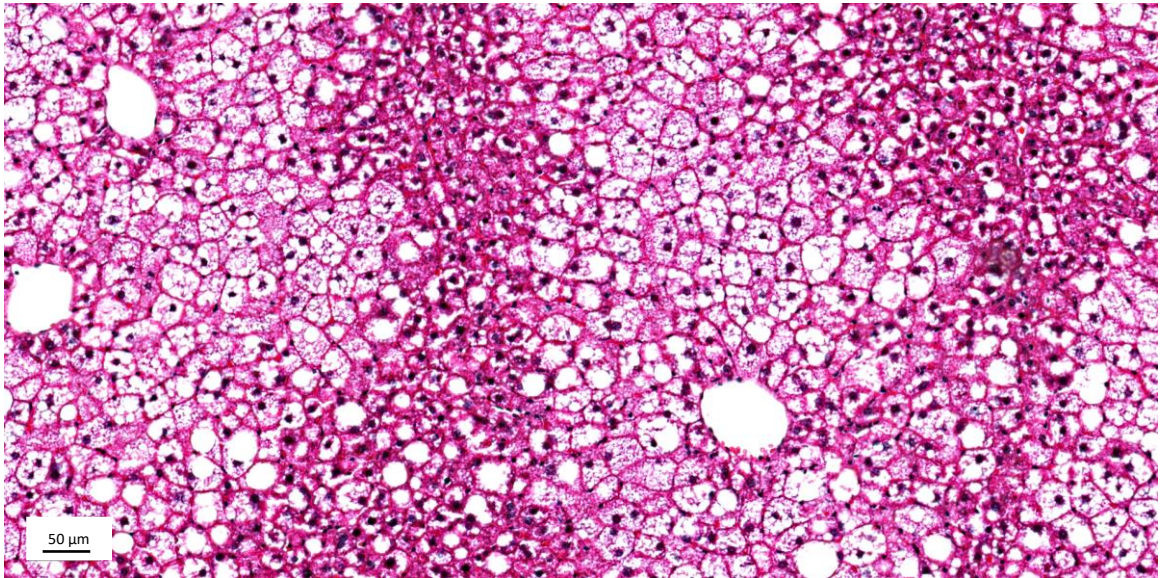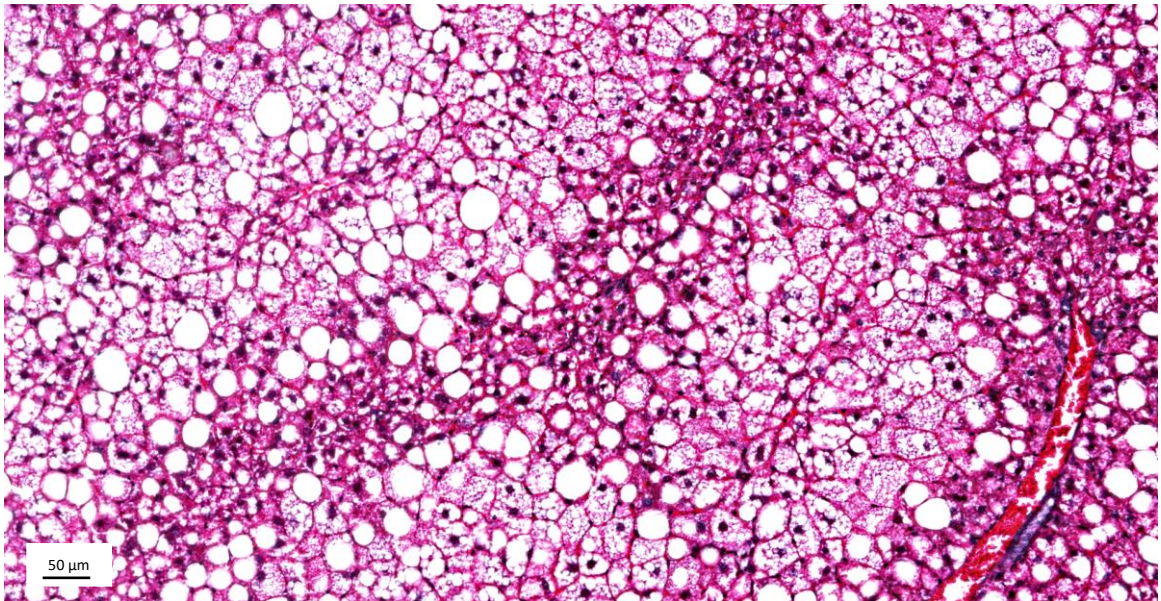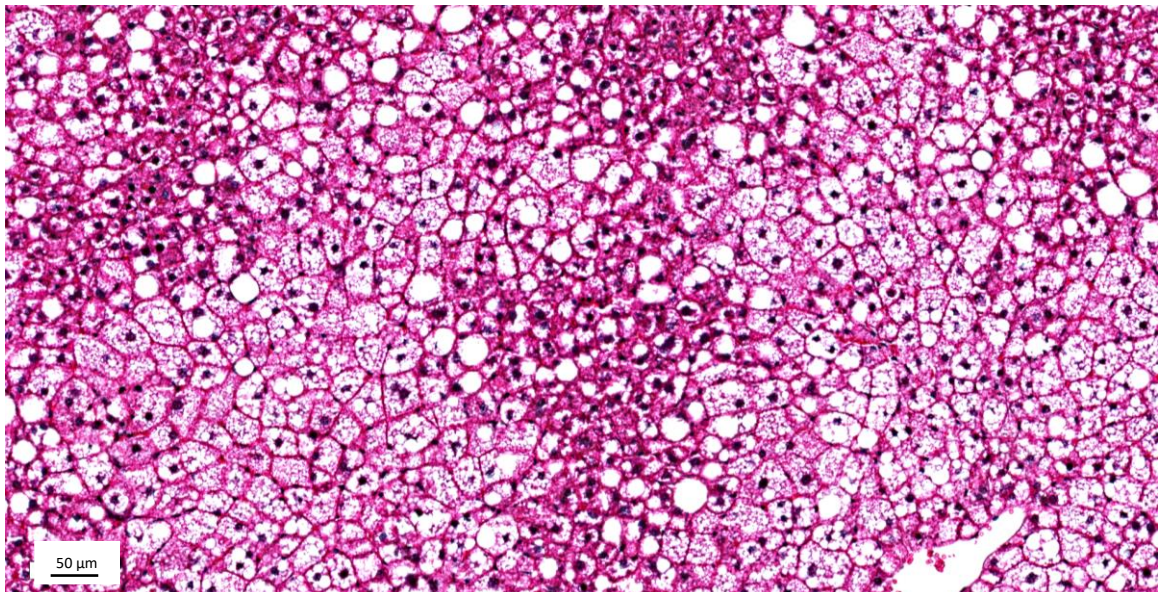



# HFHCD-15

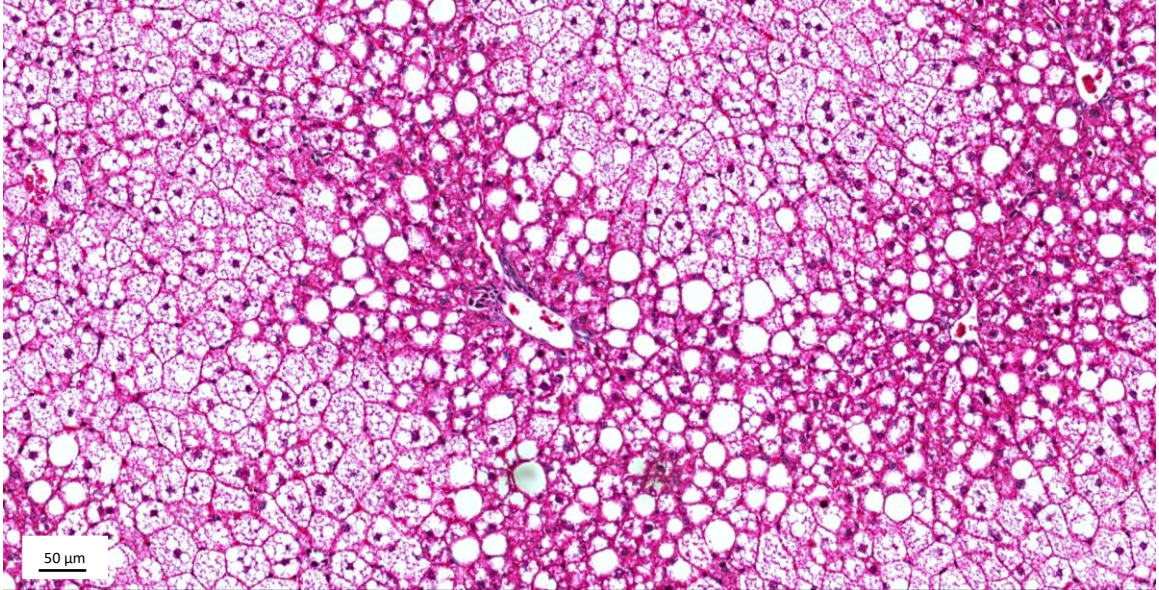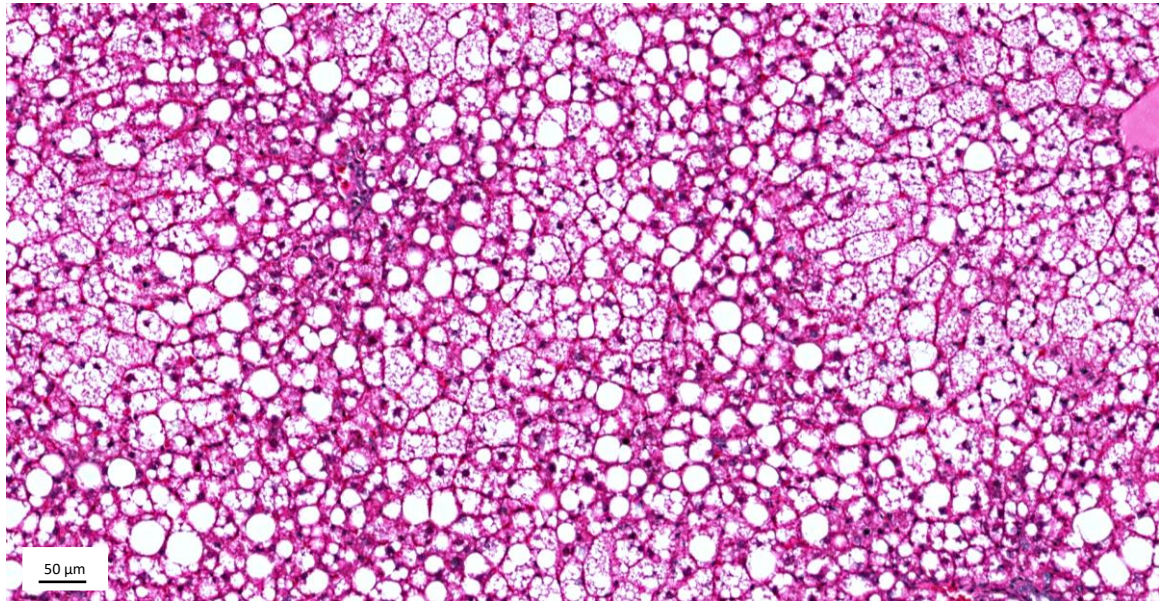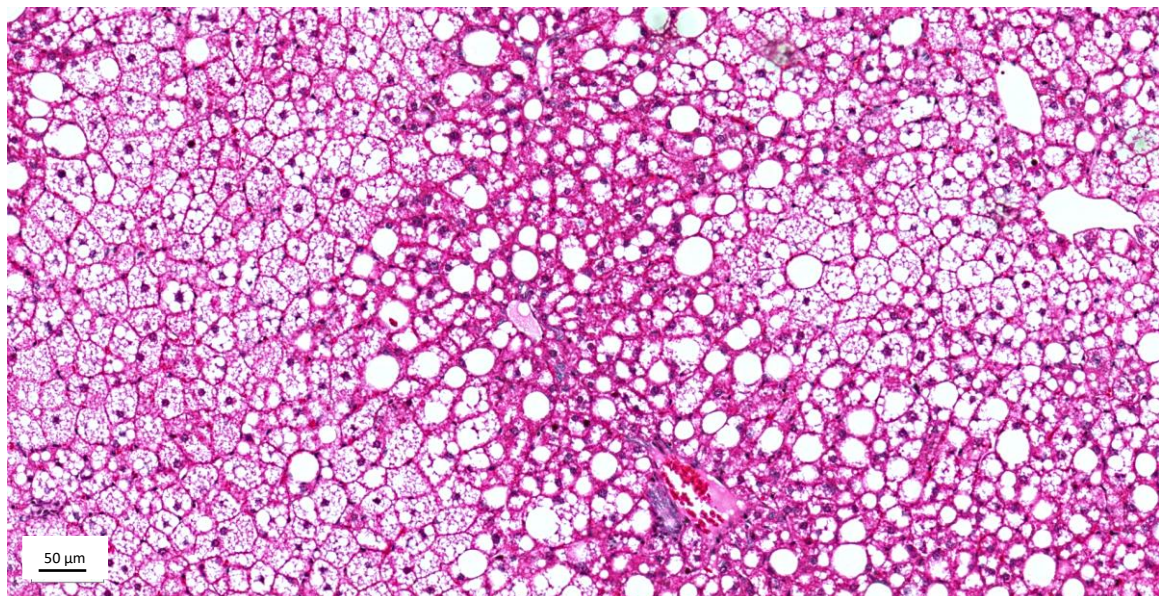



**H&E Staining**

**HFHCD-I group**

(12 mice were included)



# HFHCD-I-1

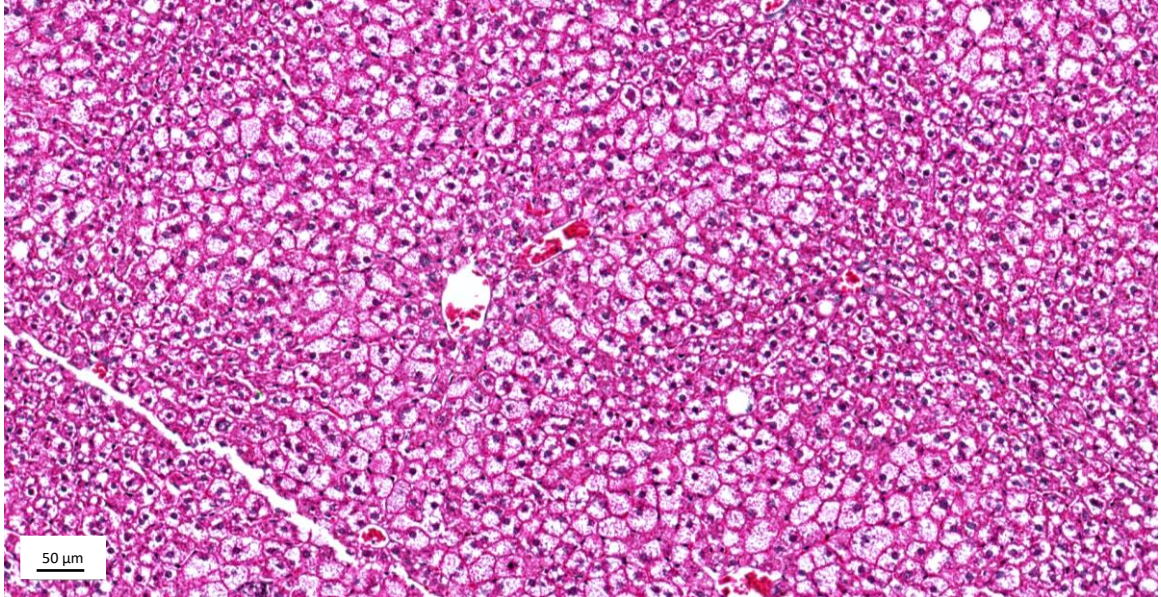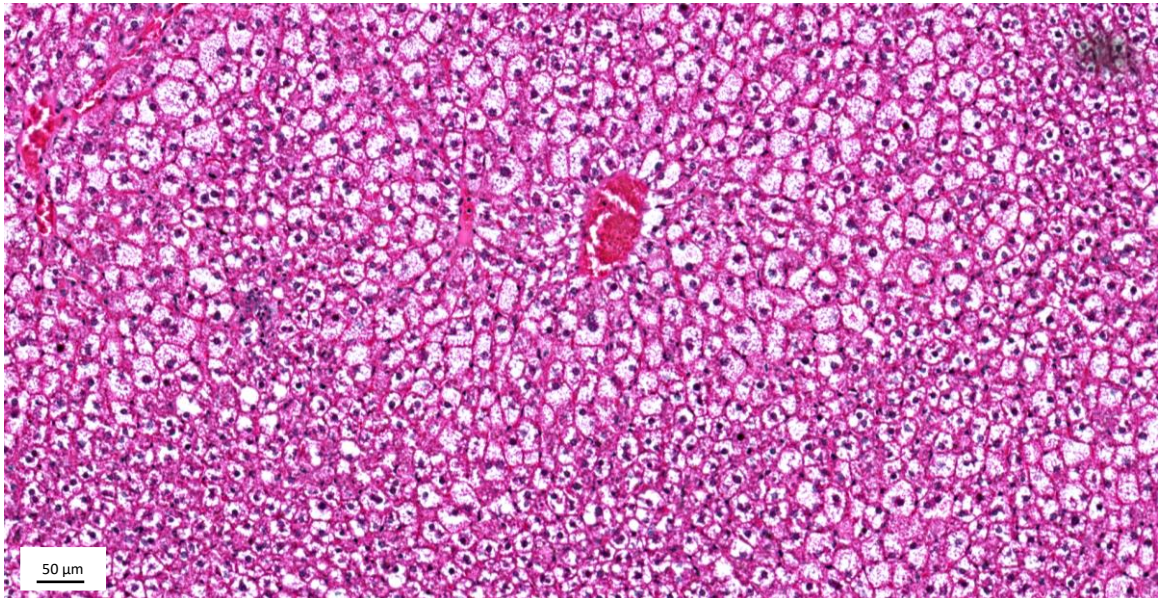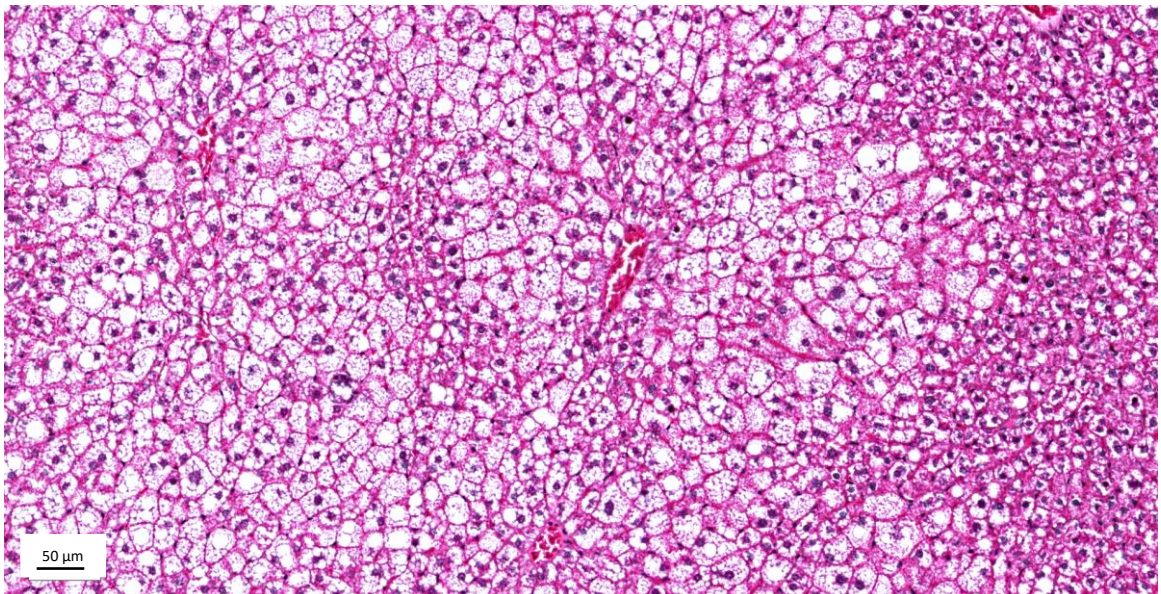



# HFHCD-I-2

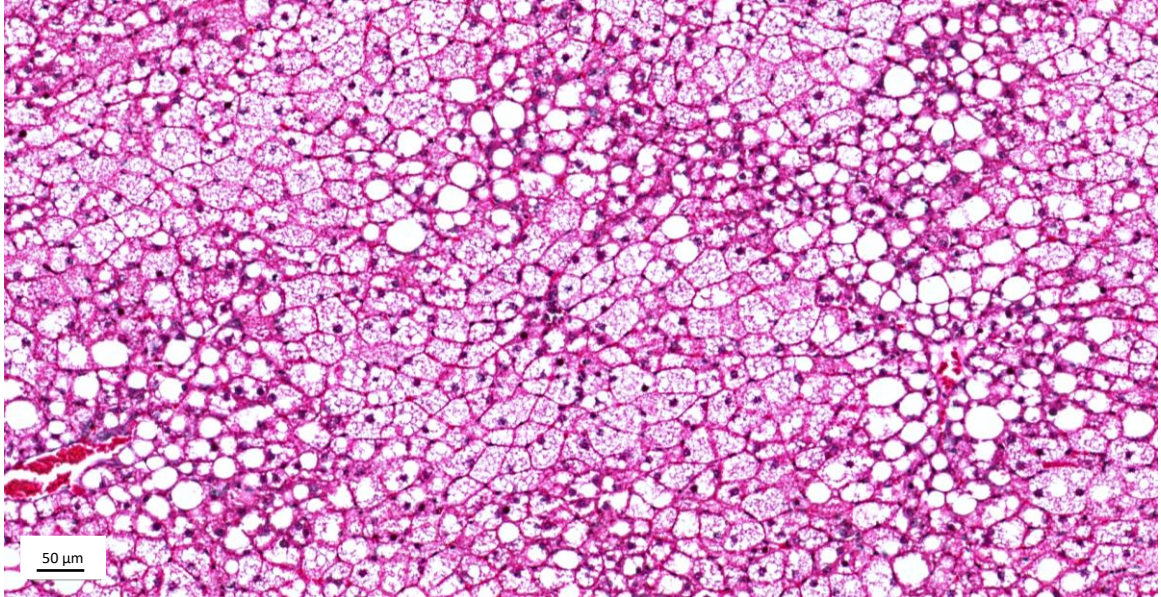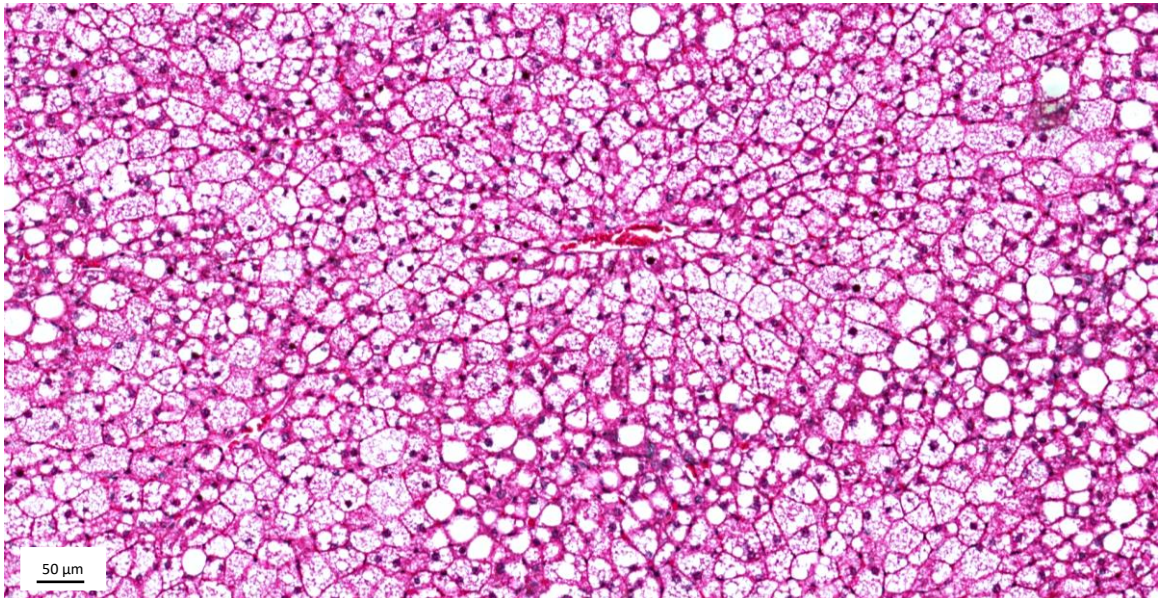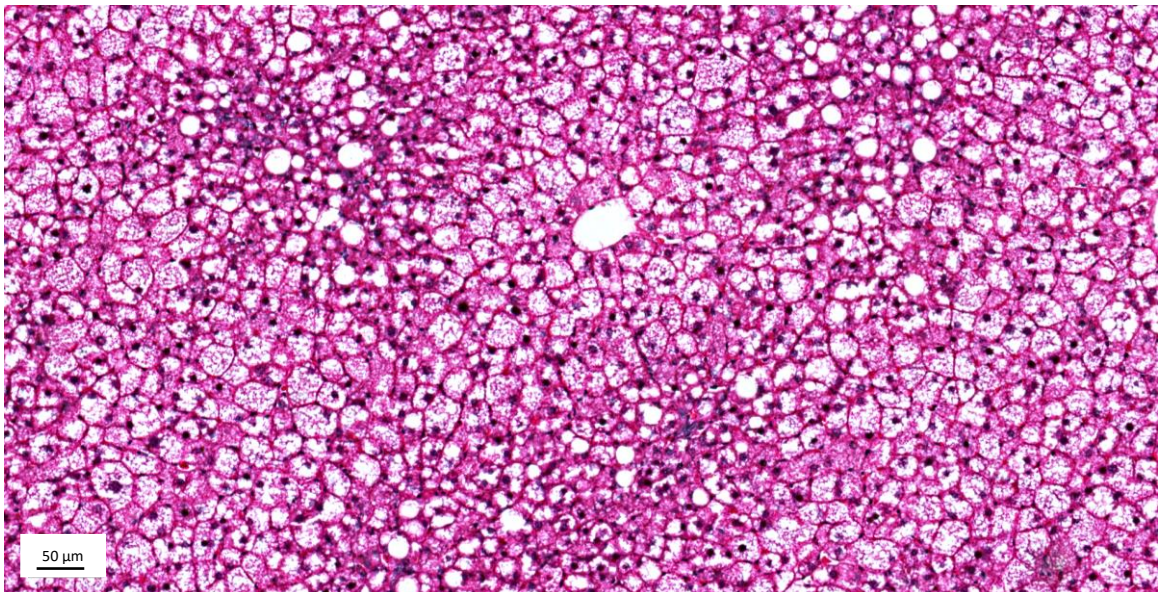



# HFHCD-I-3

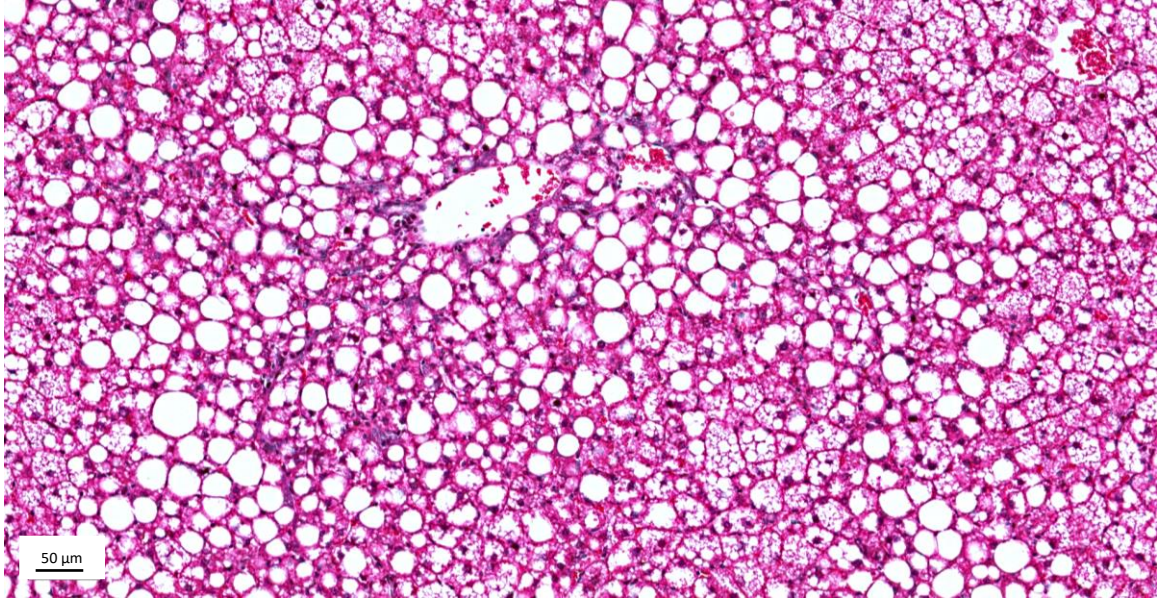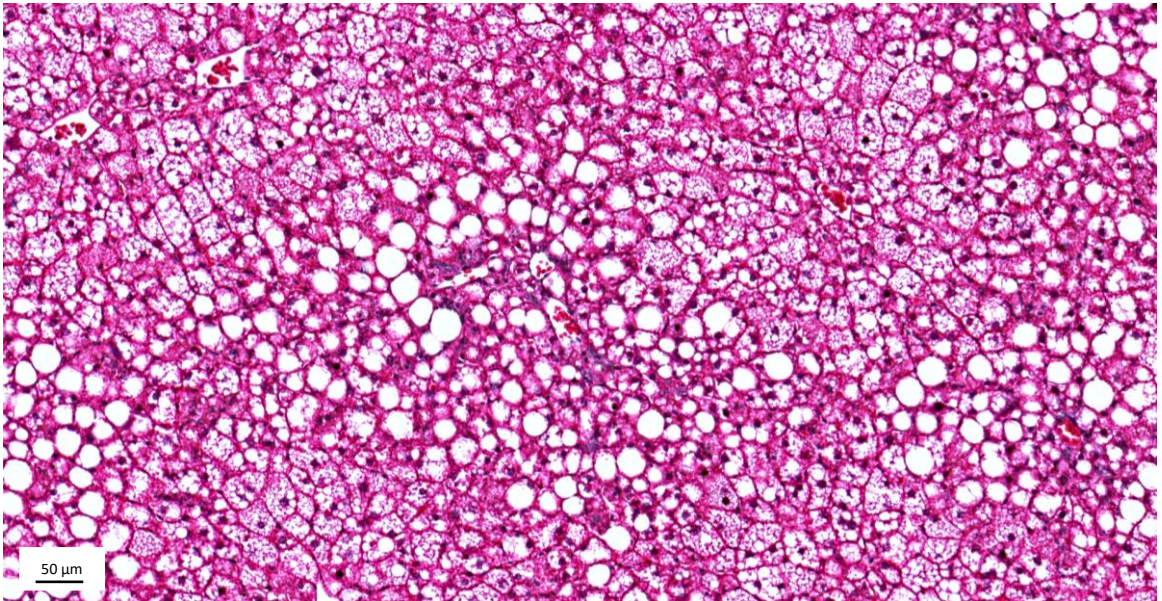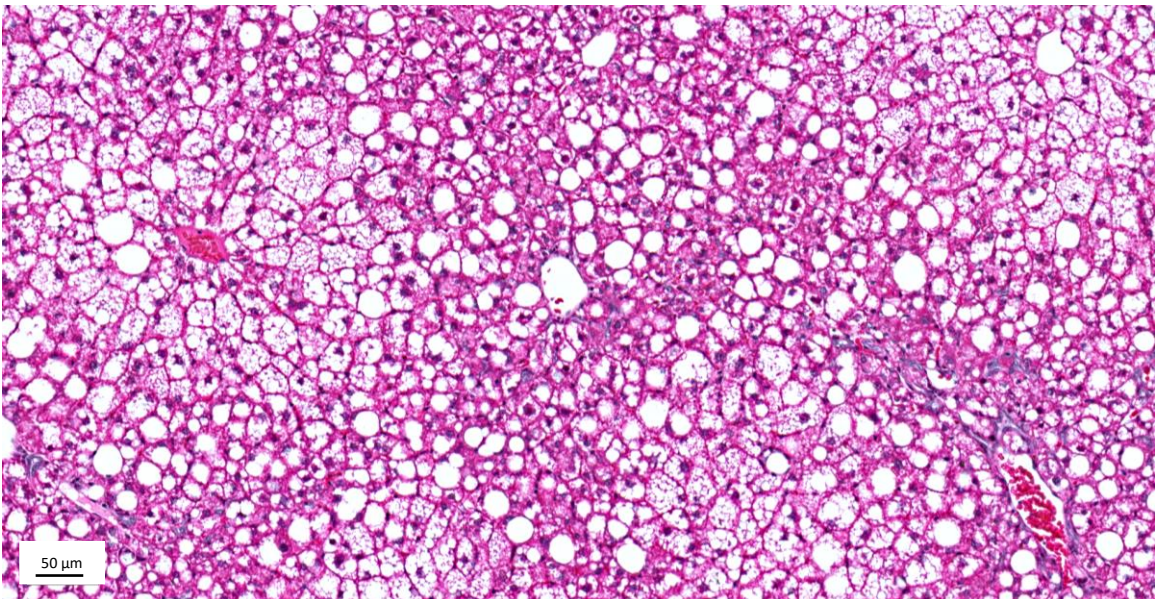



# HFHCD-I-4

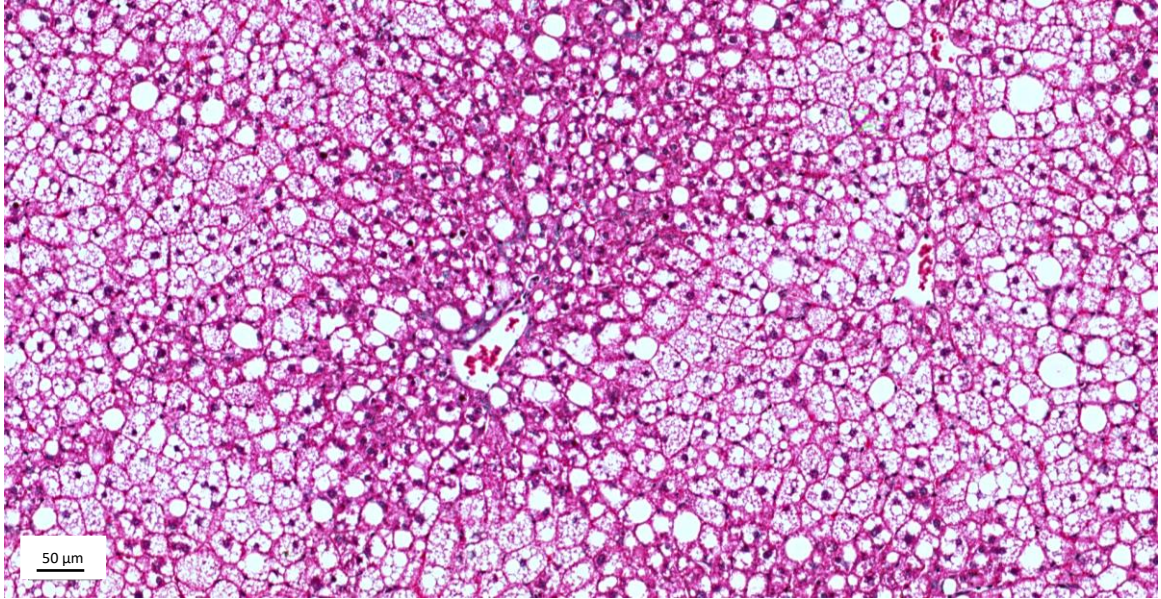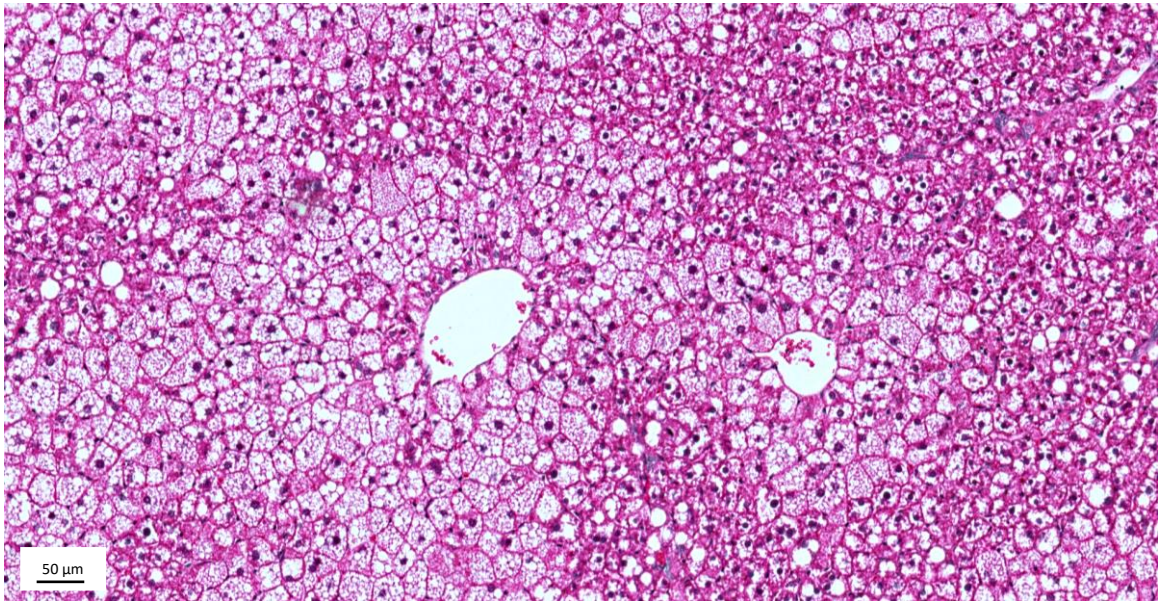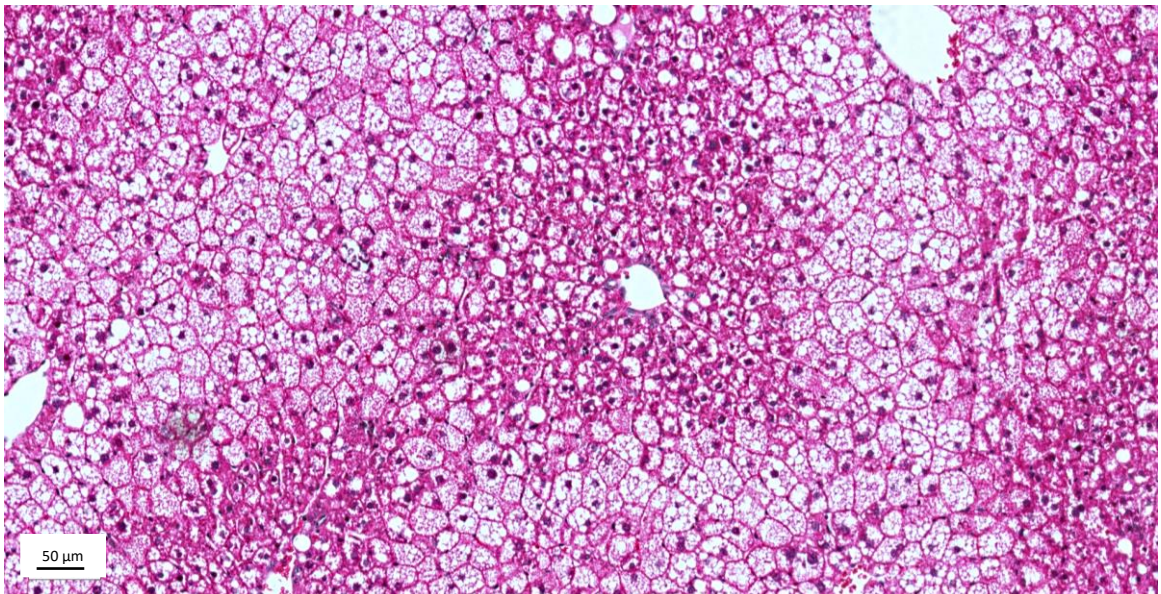



# HFHCD-I-5

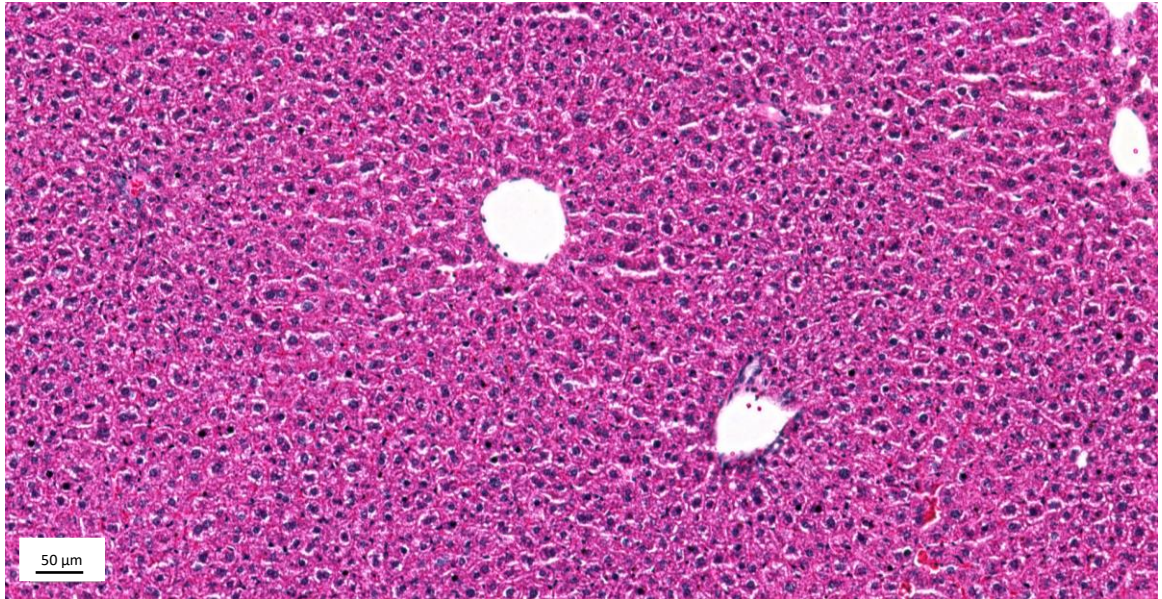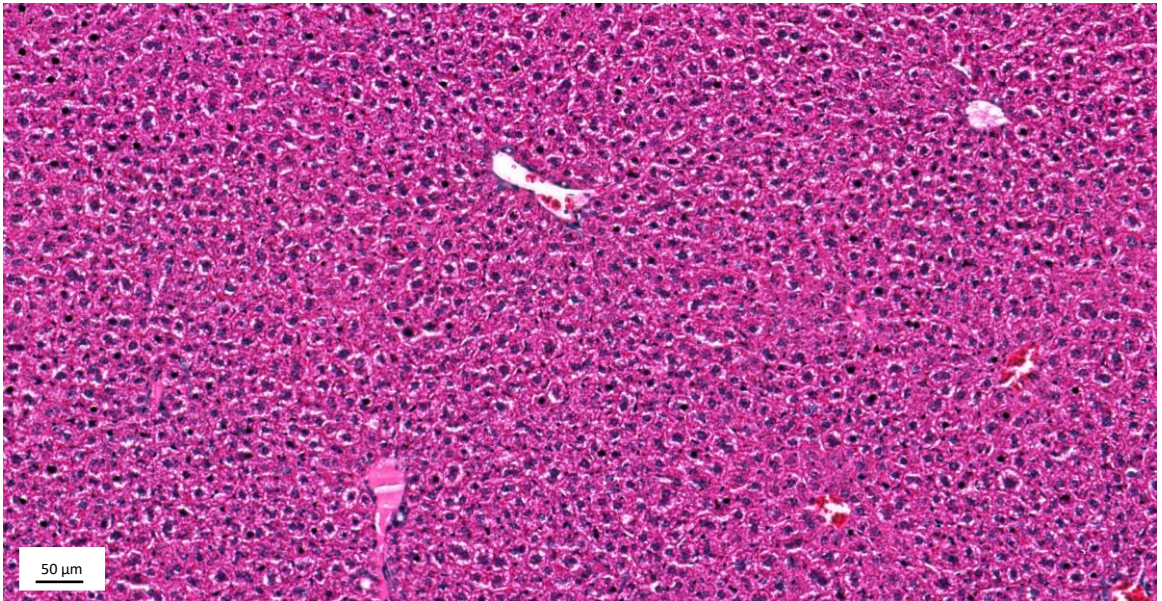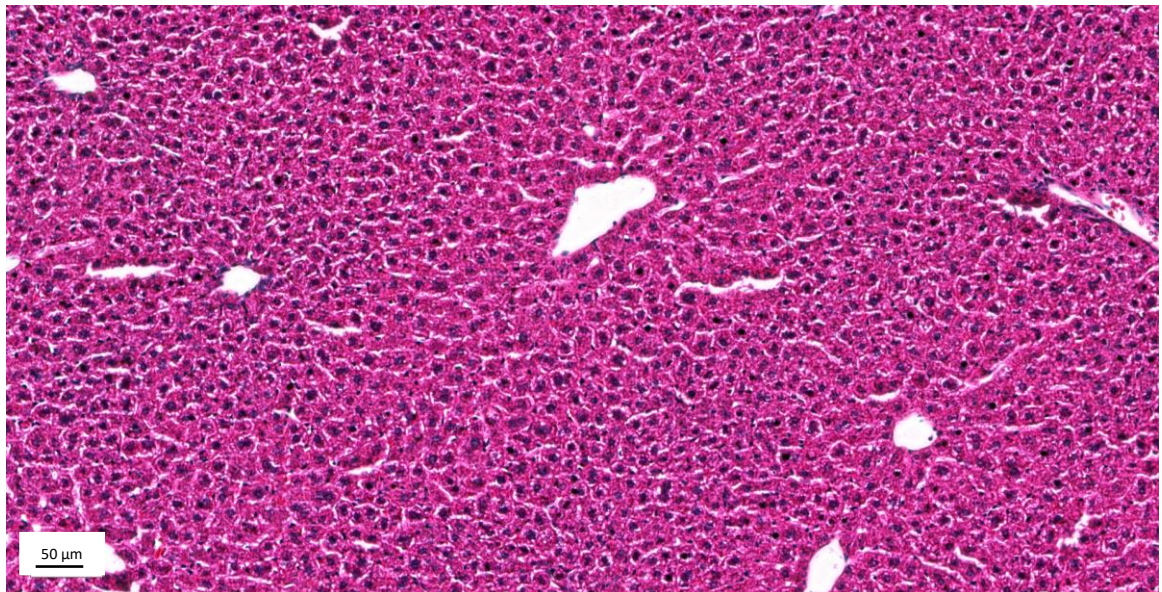



# HFHCD-I-6

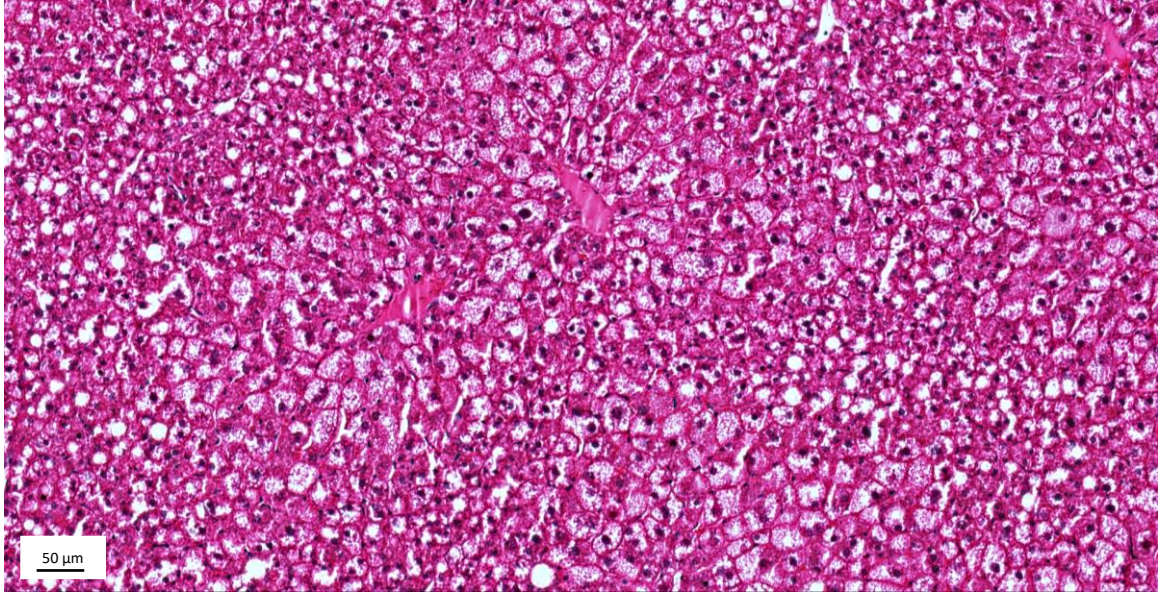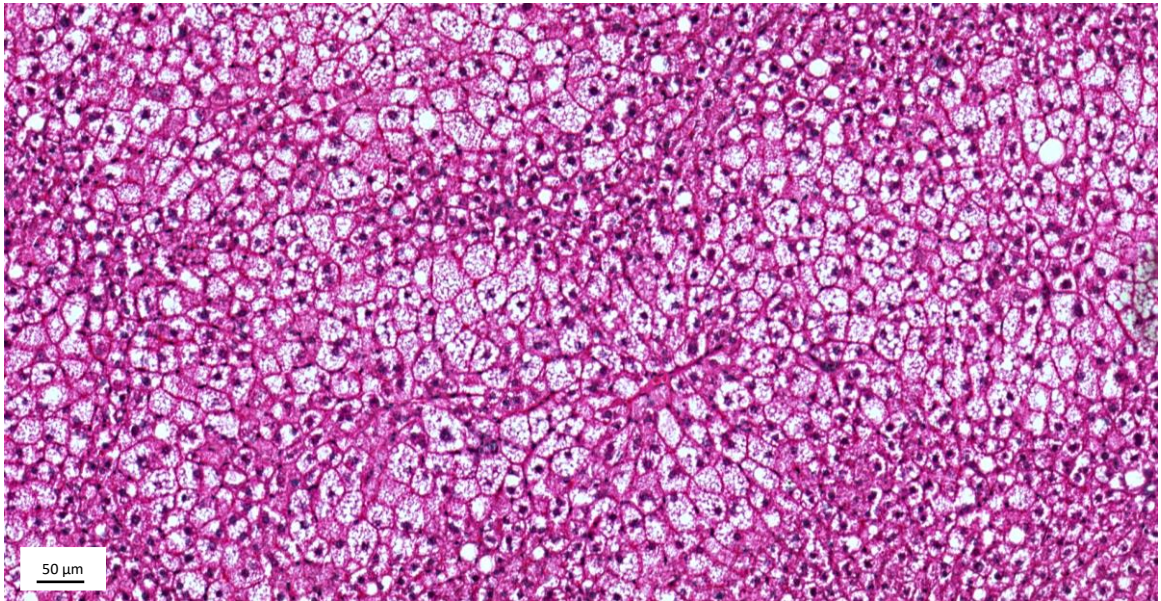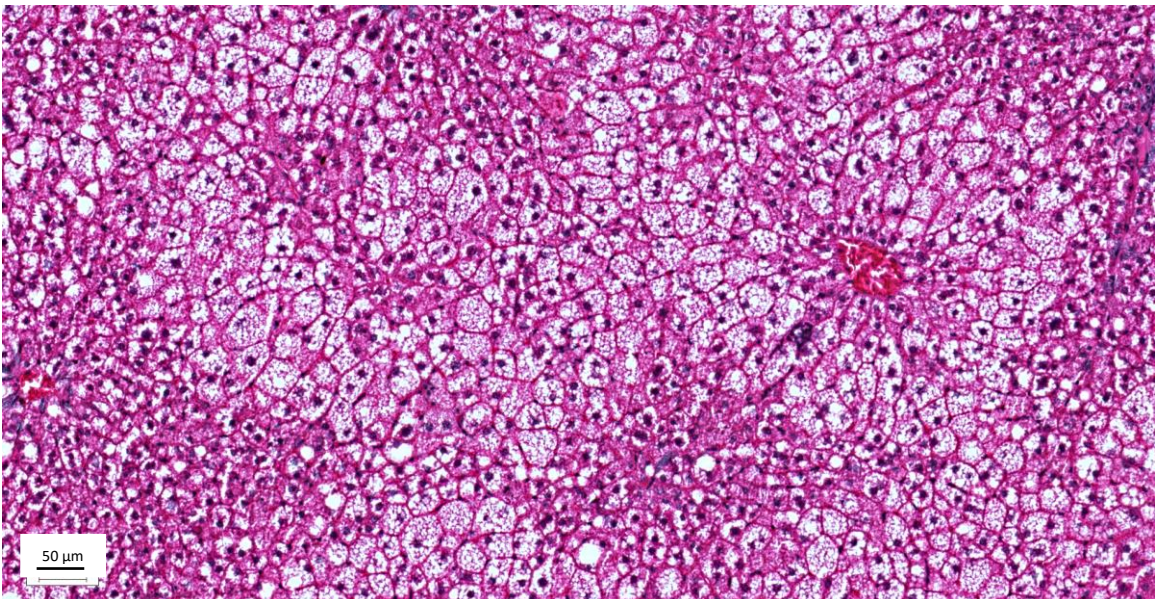



# HFHCD-I-7

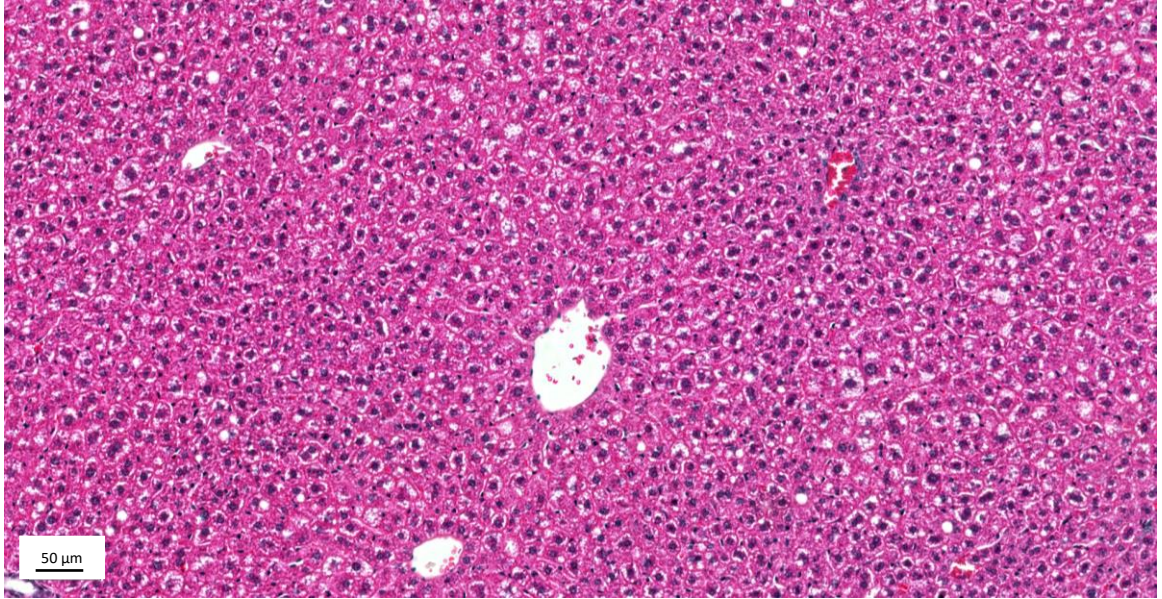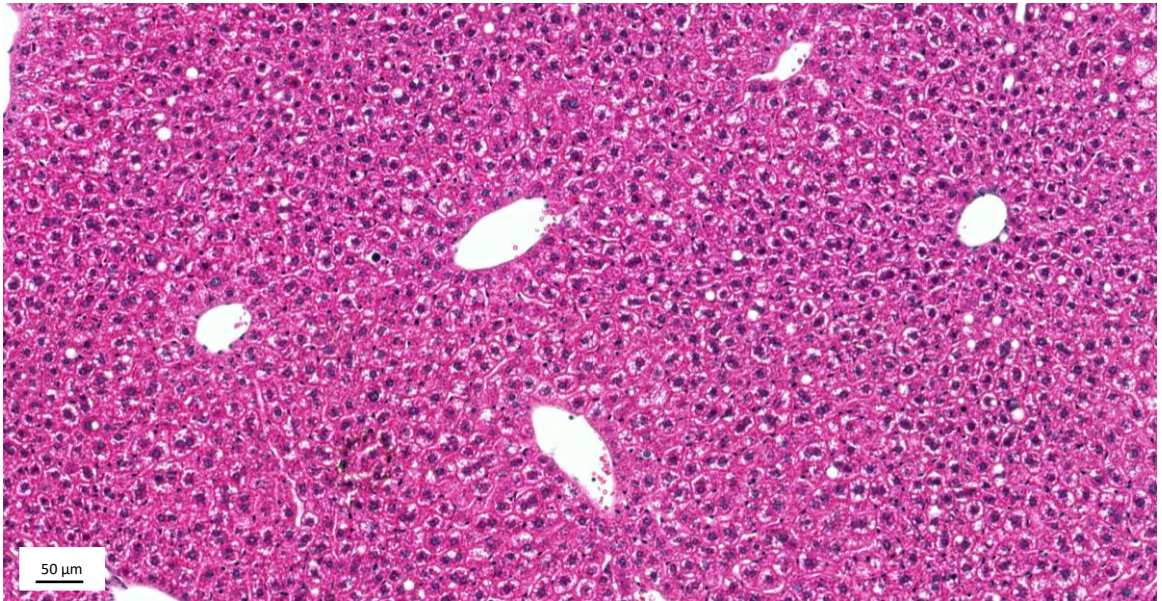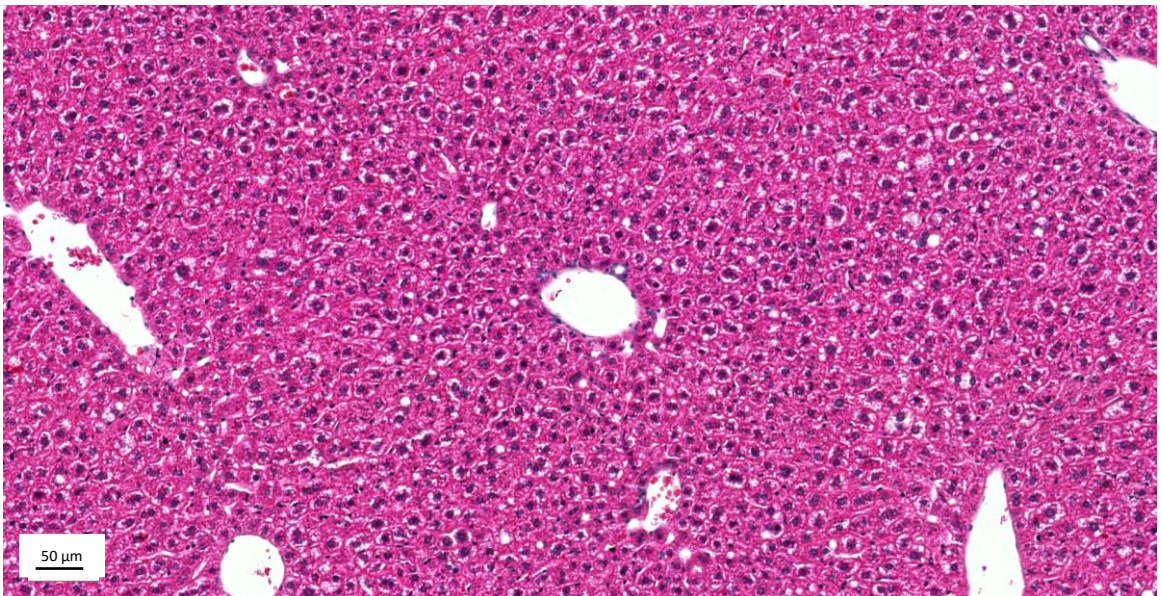



# HFHCD-I-8

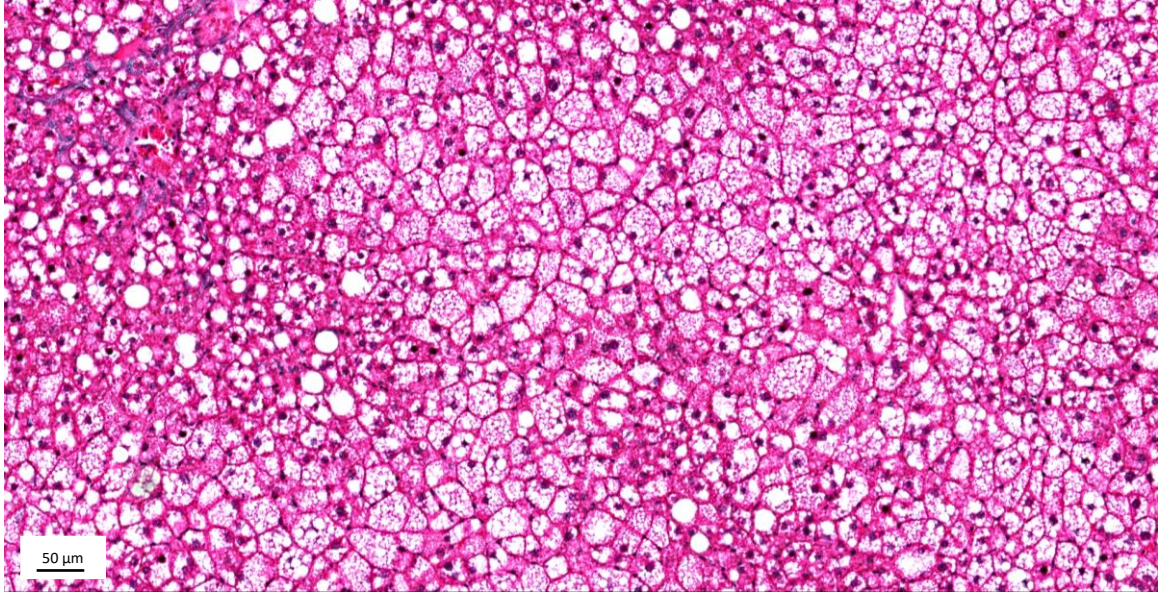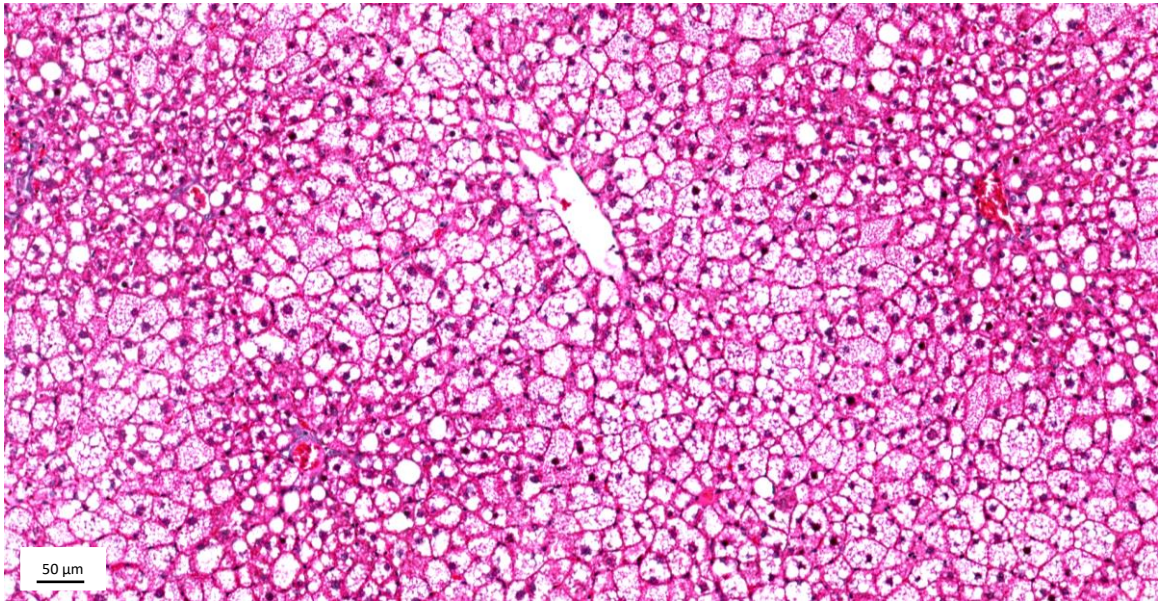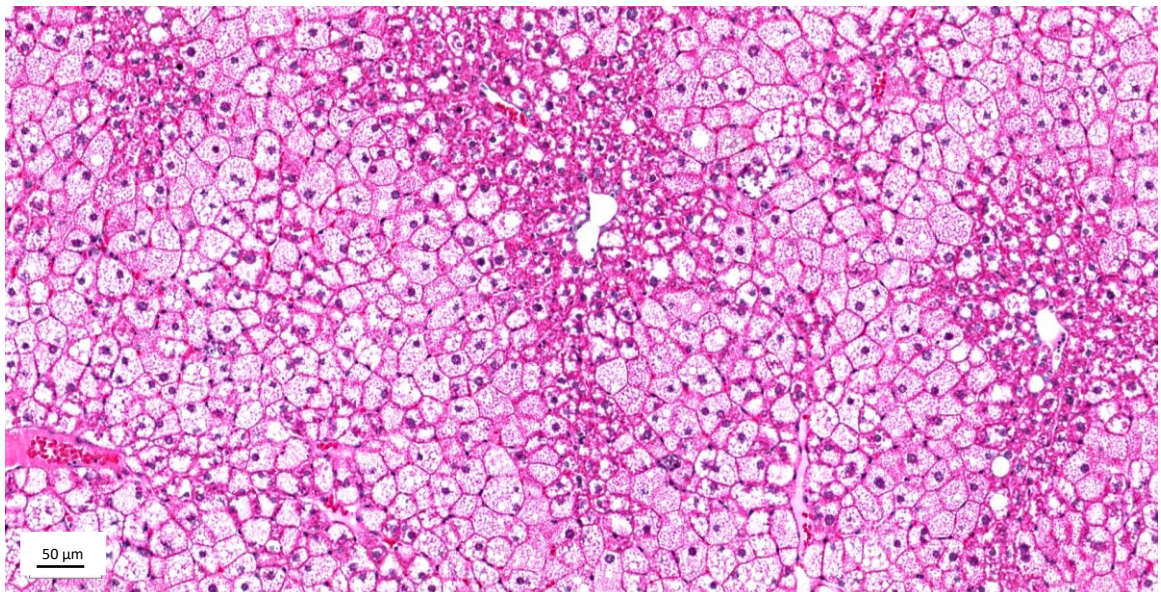



# HFHCD-I-9

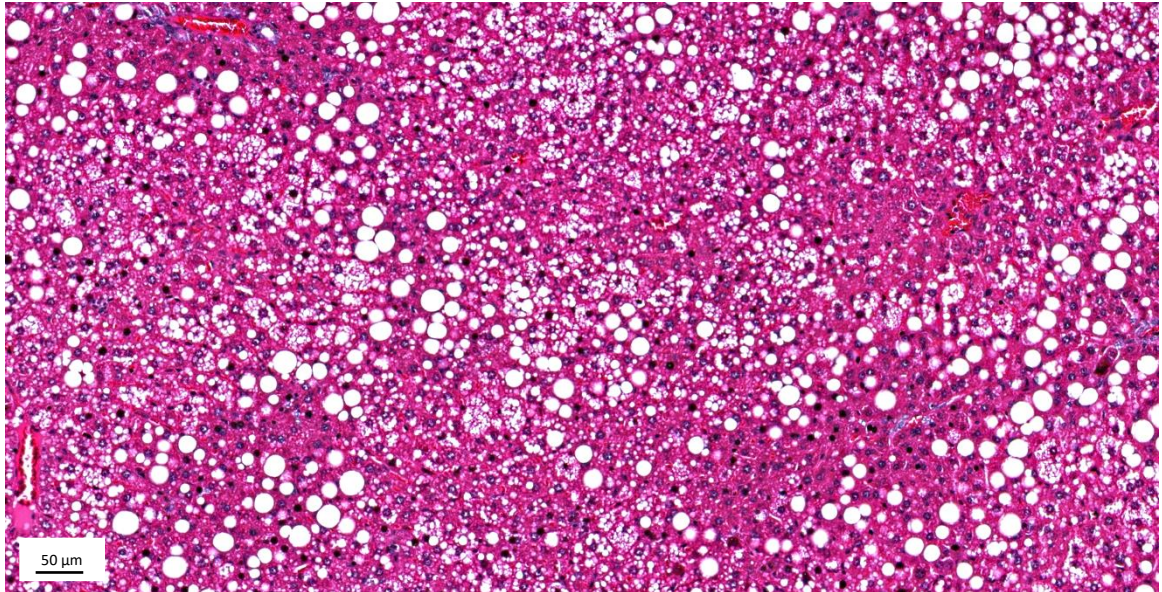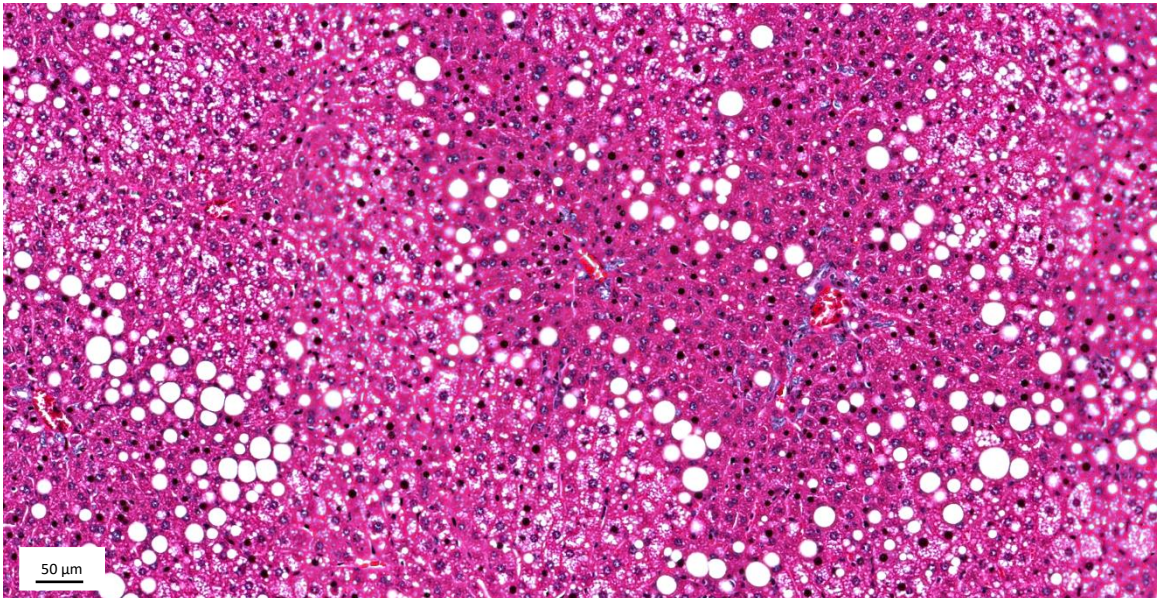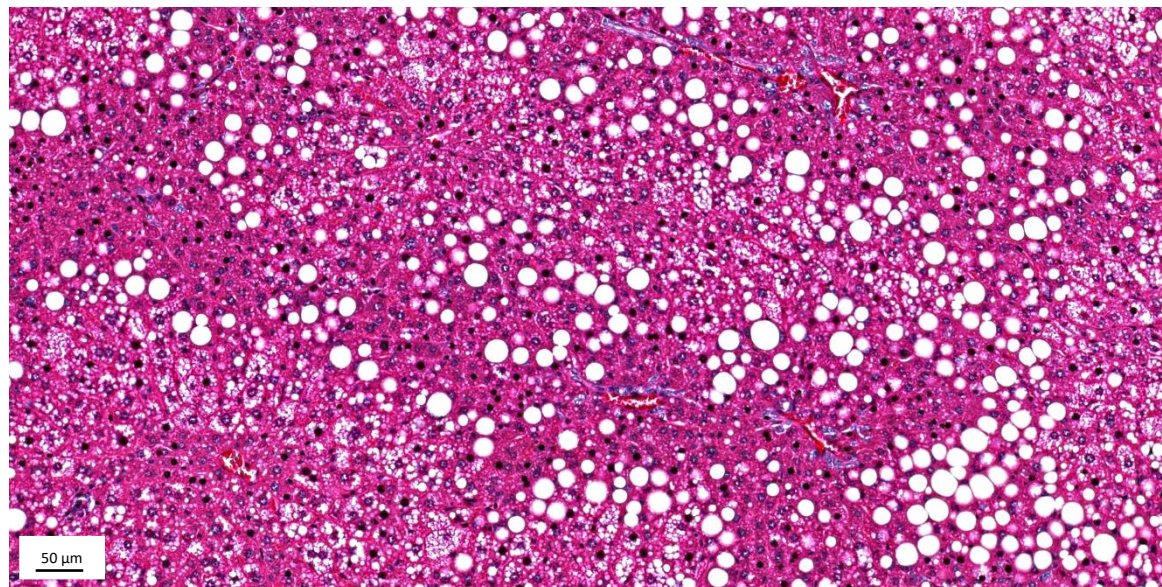



# HFHCD-I-10

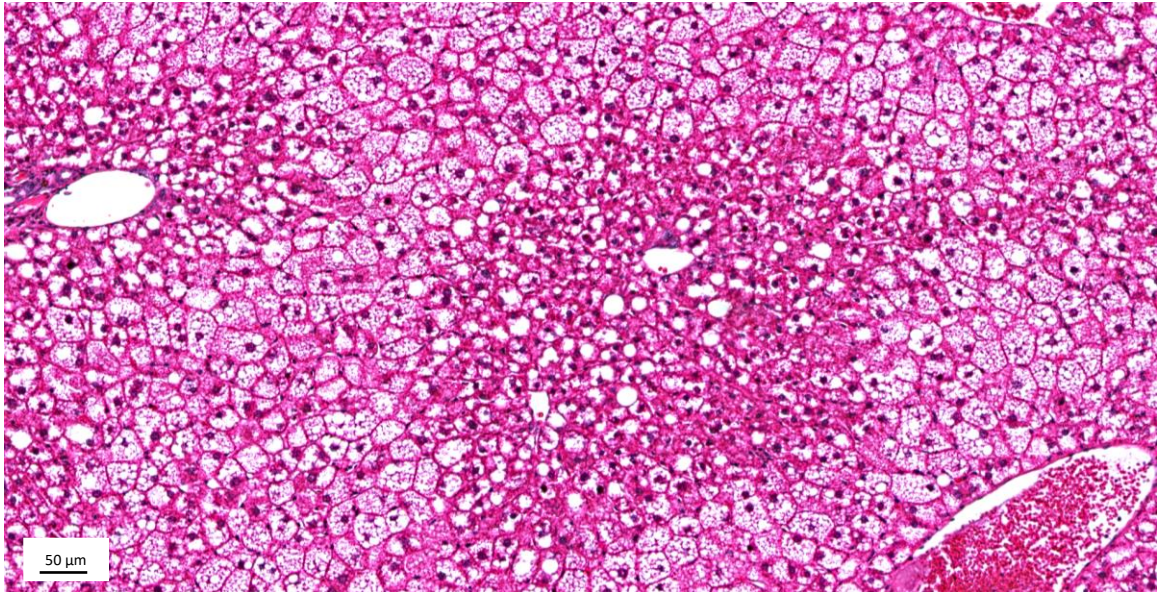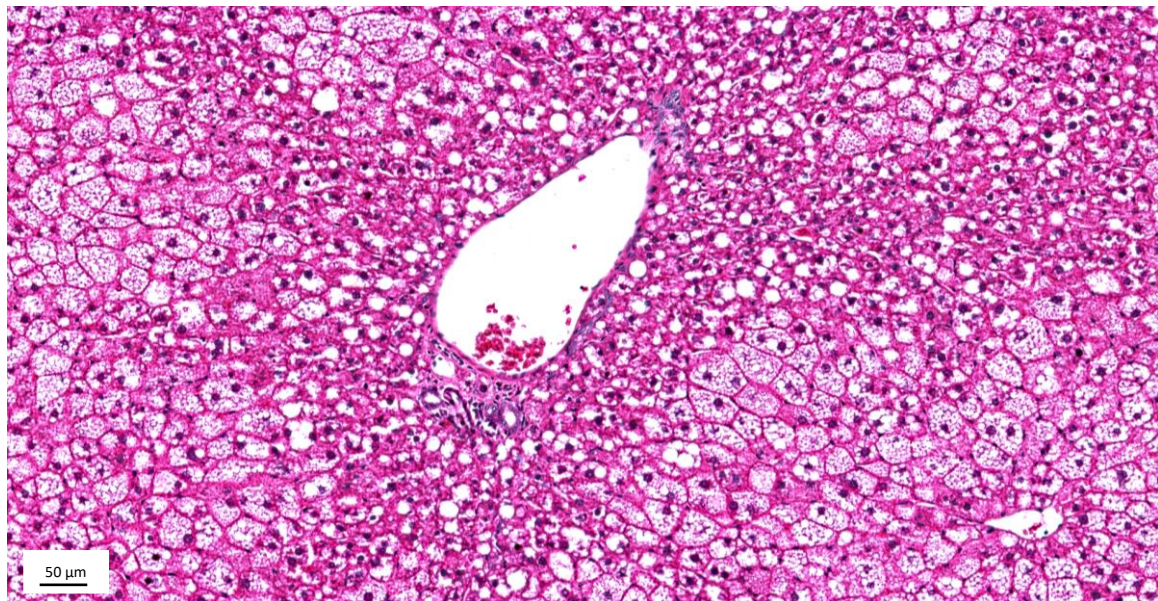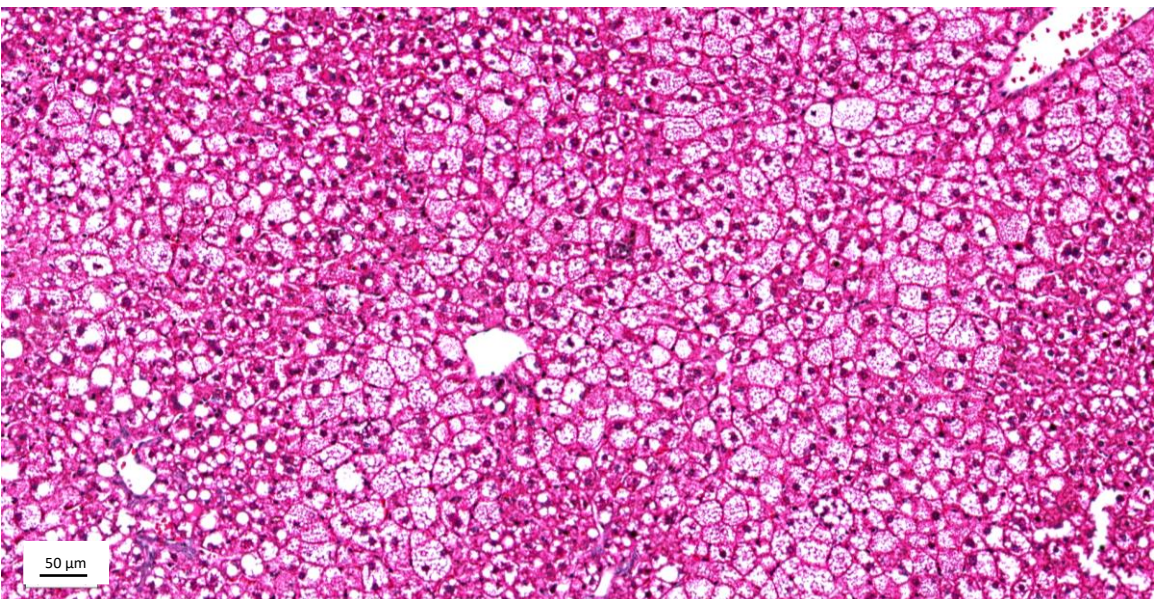



# HFHCD-I-11

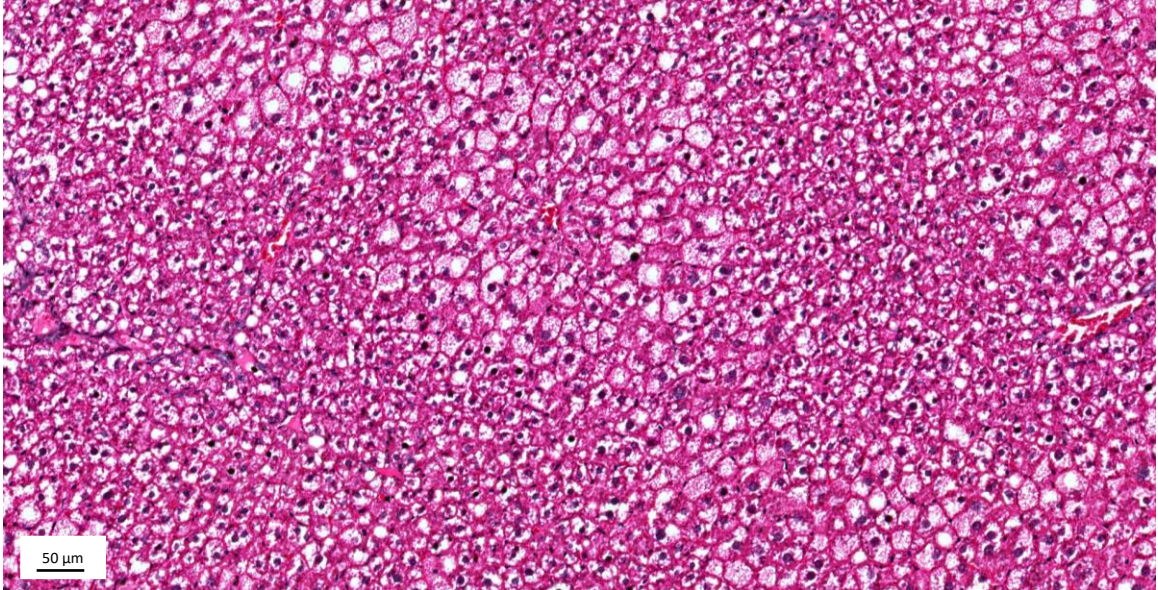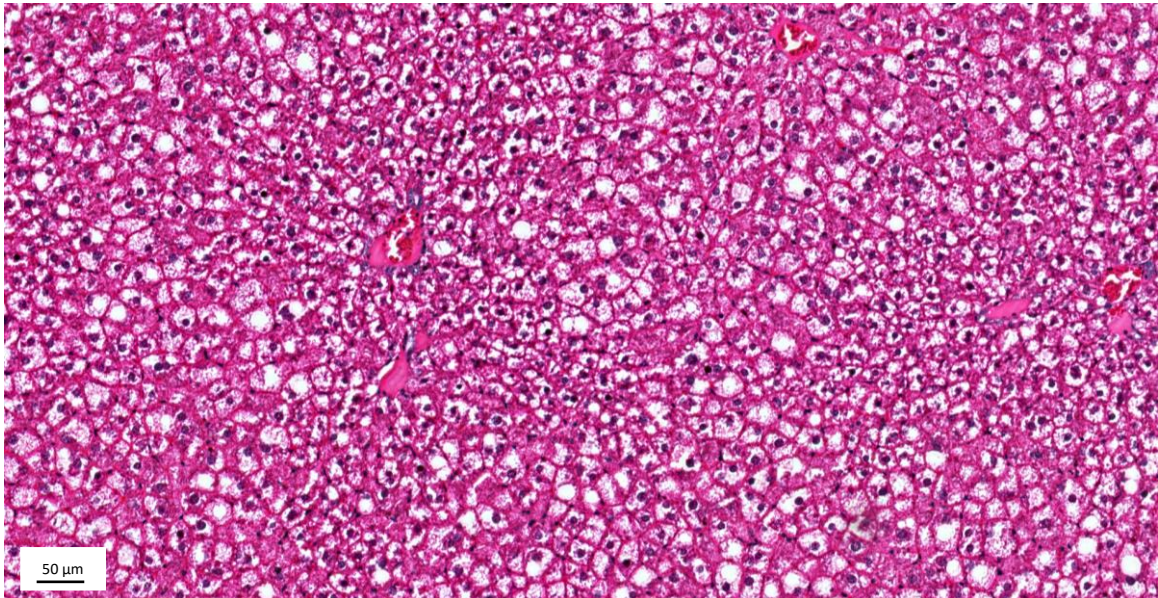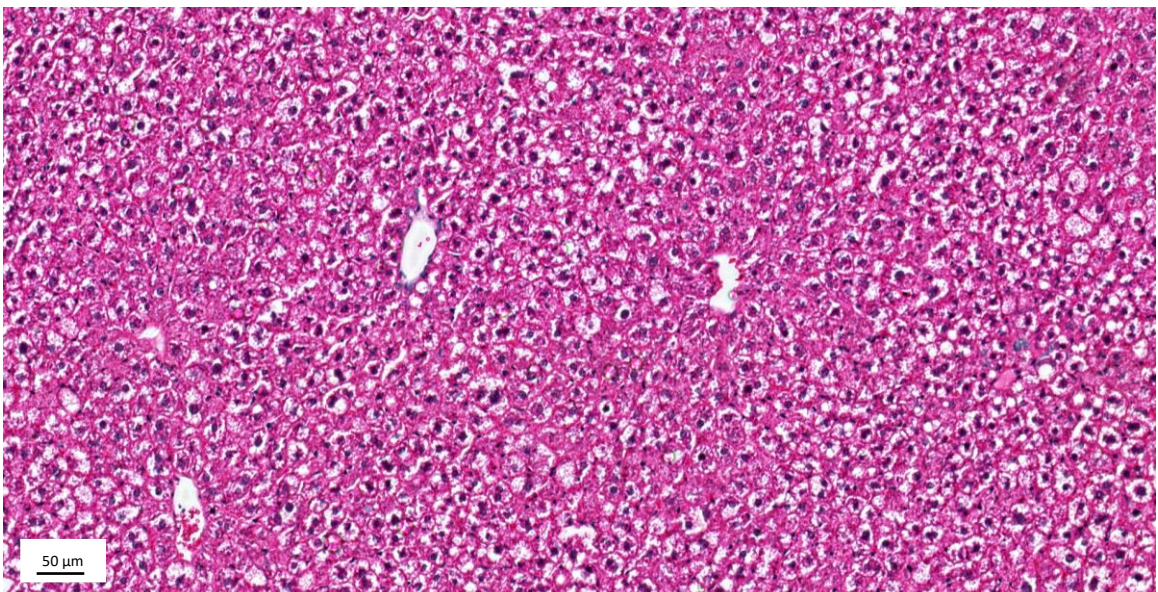



# HFHCD-I-12

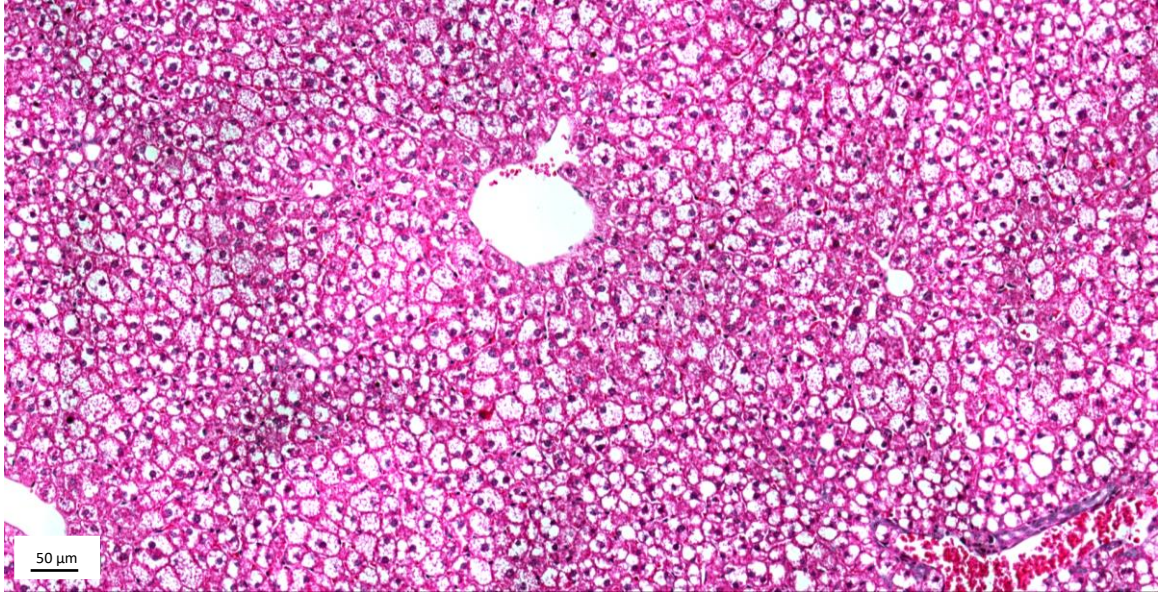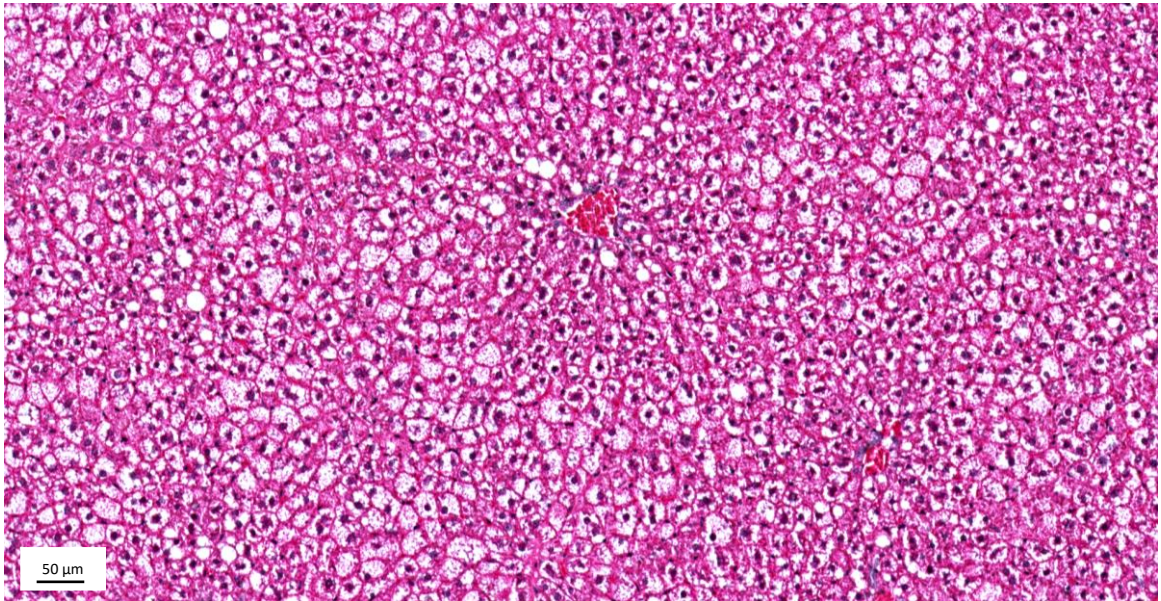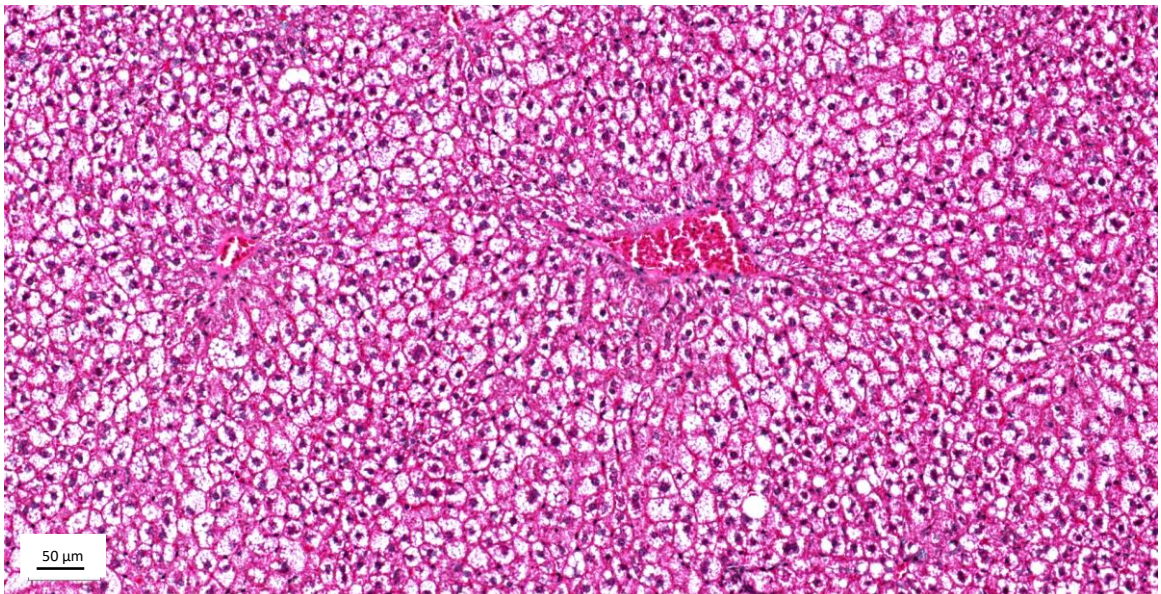



**H&E Staining**

**HFHCD-C group**

(12 mice were included)



# HFHCD-C-1

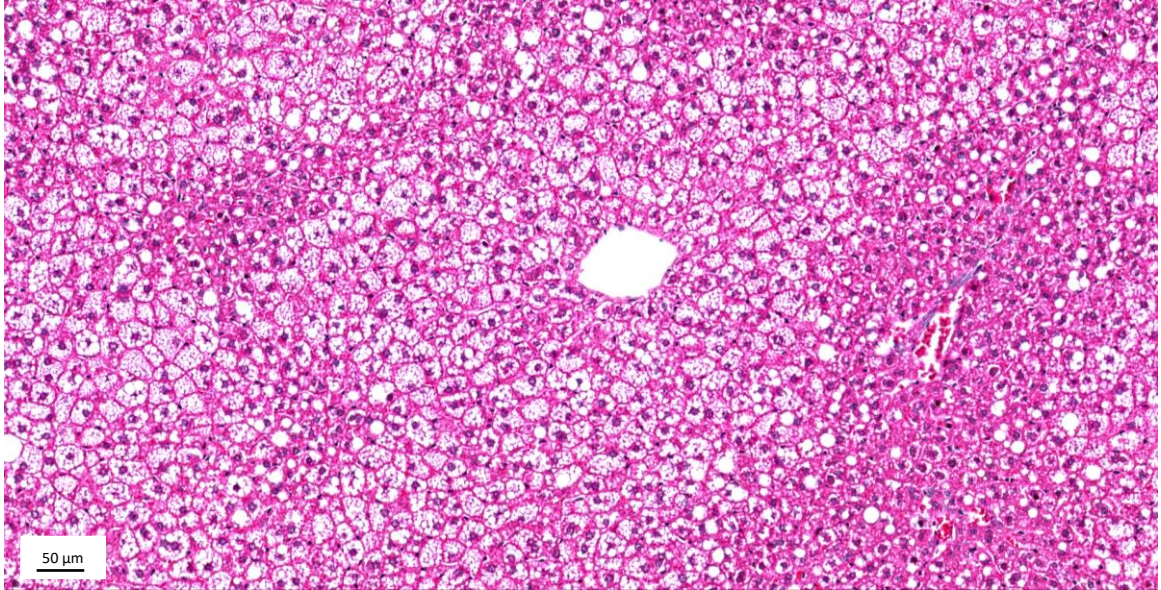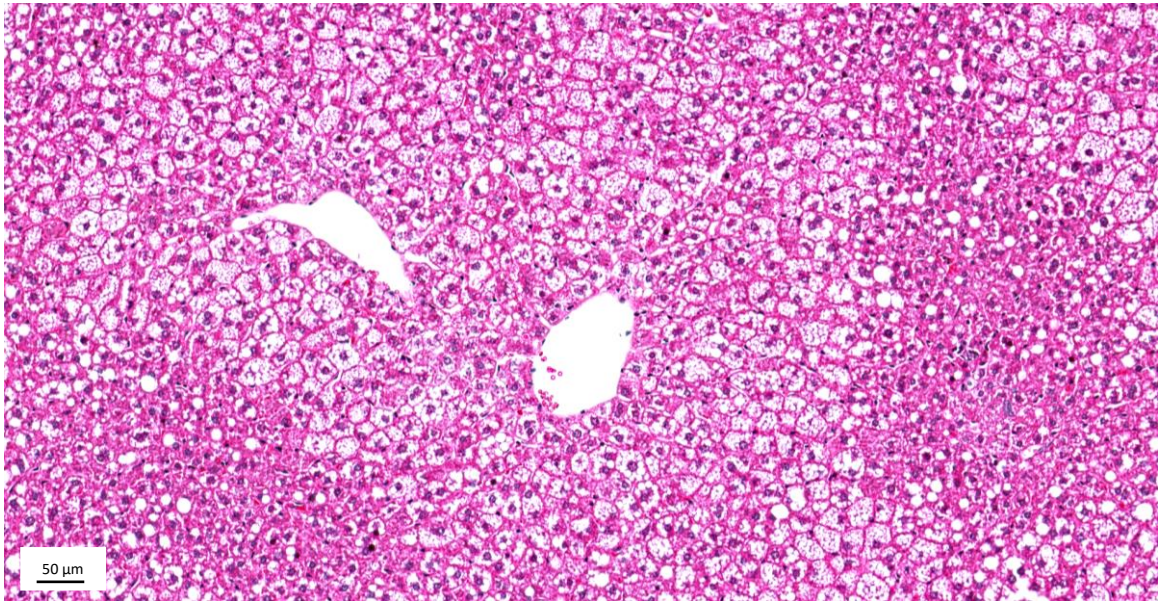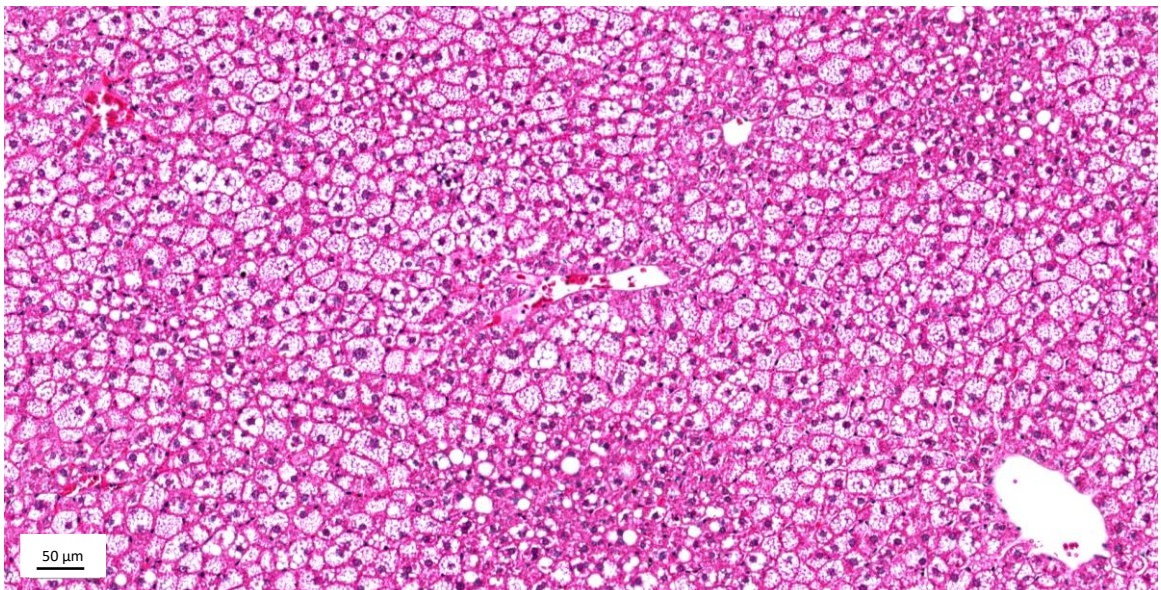



# HFHCD-C-2

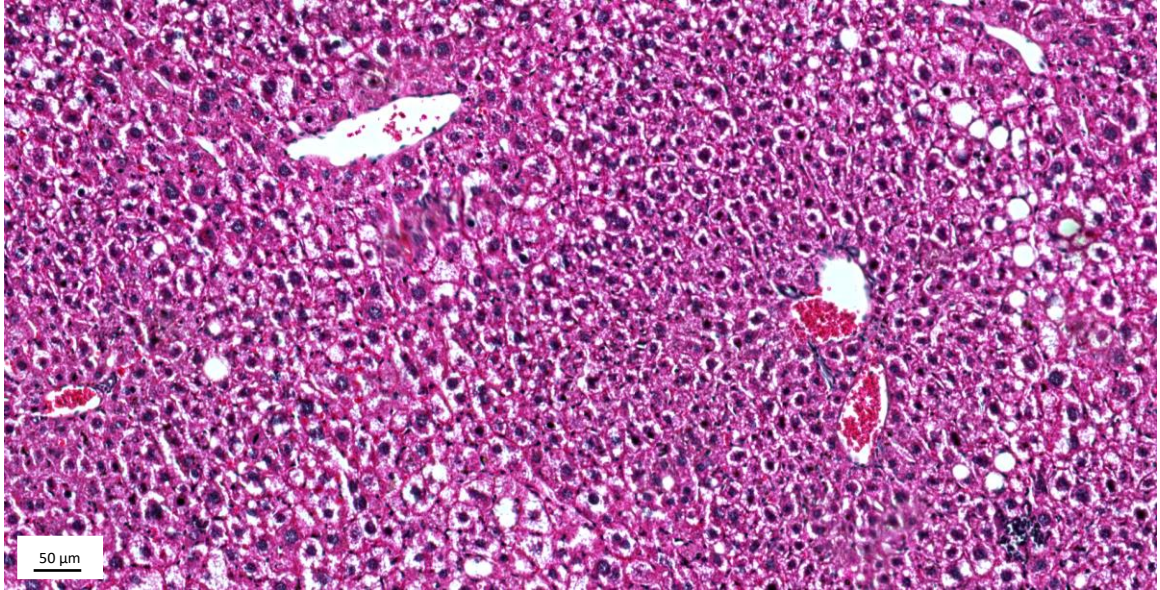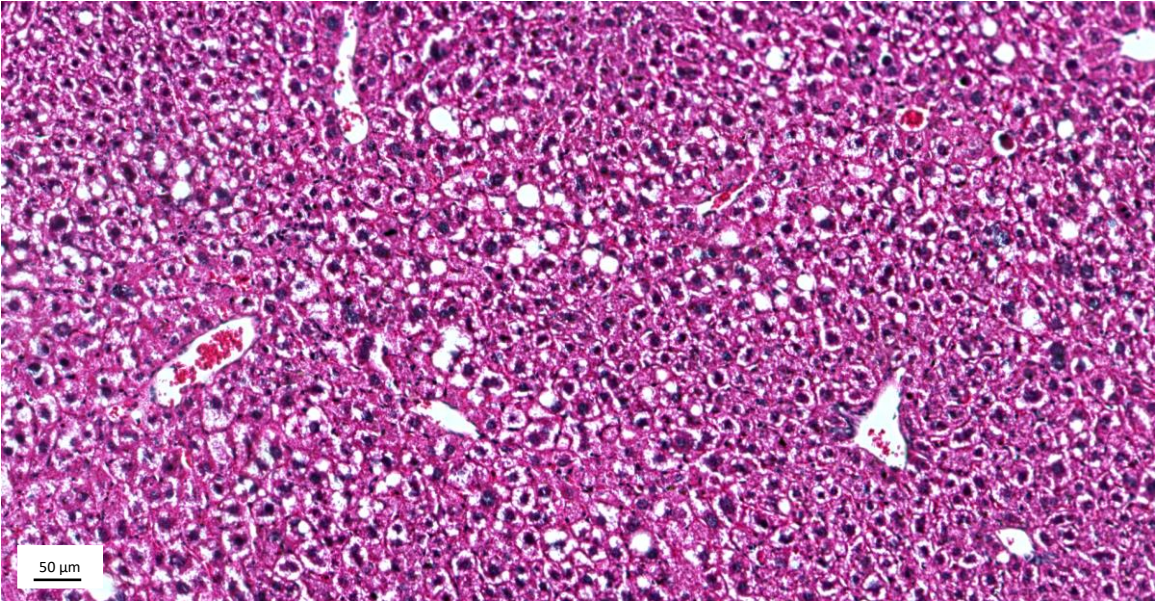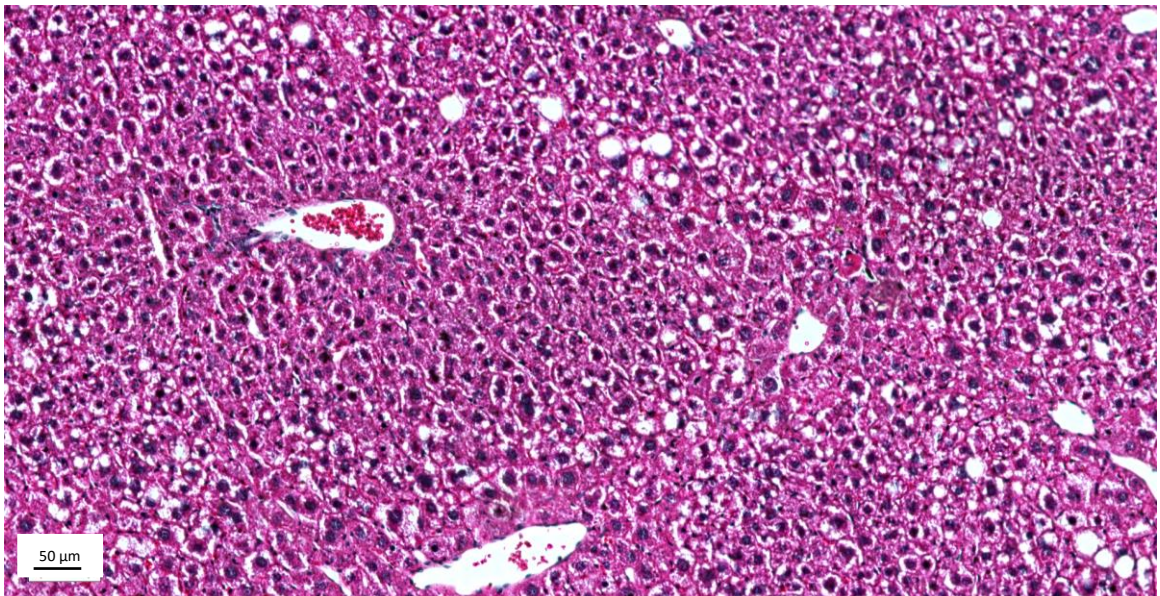



# HFHCD-C-3

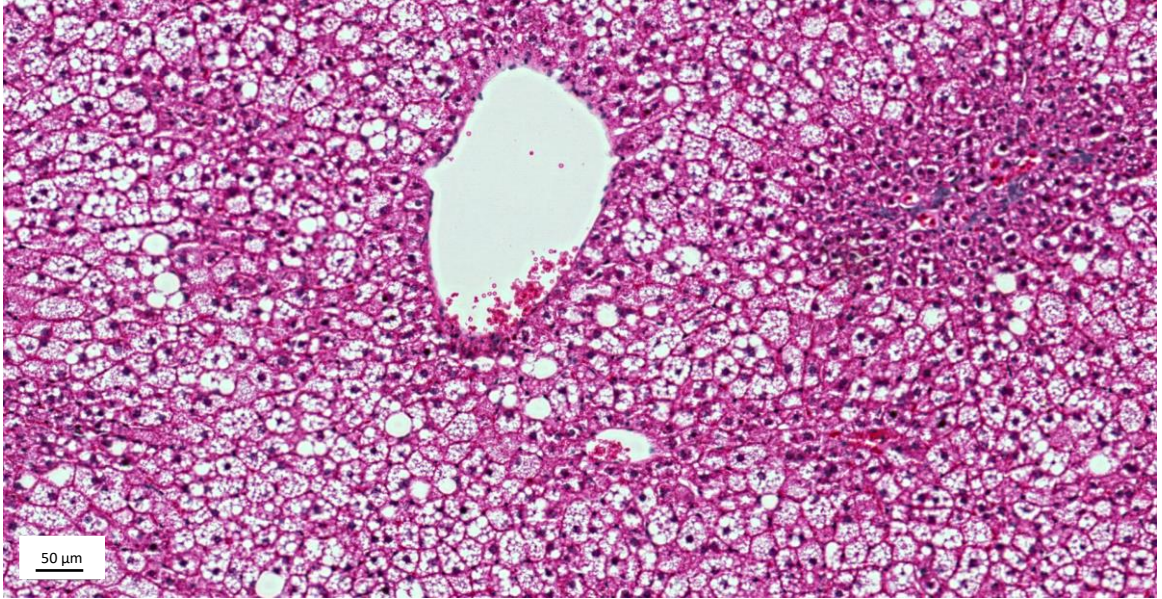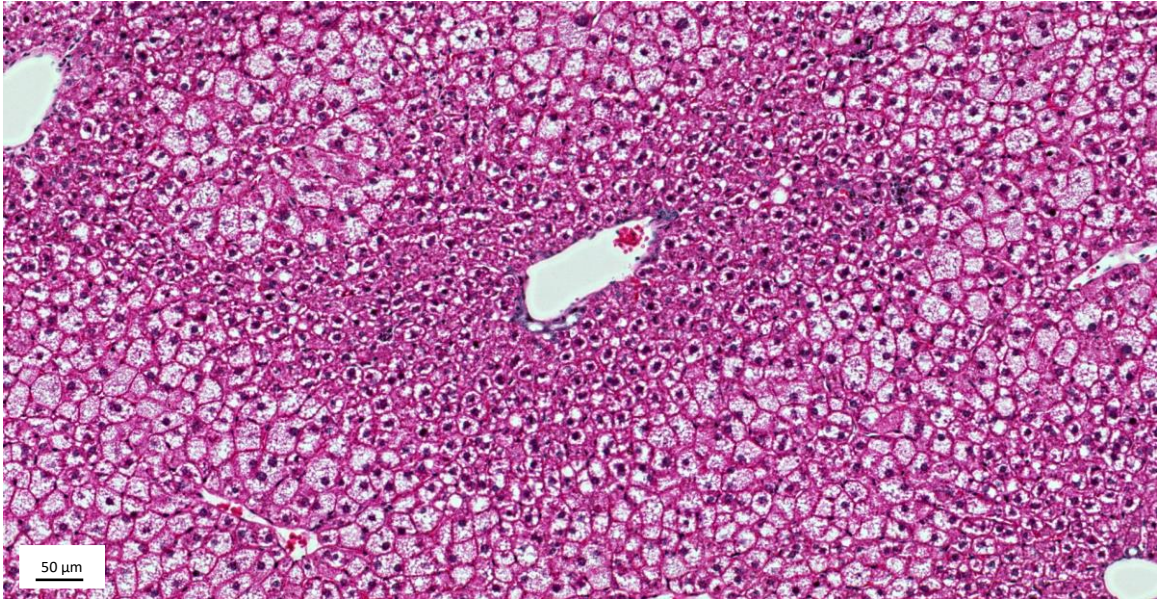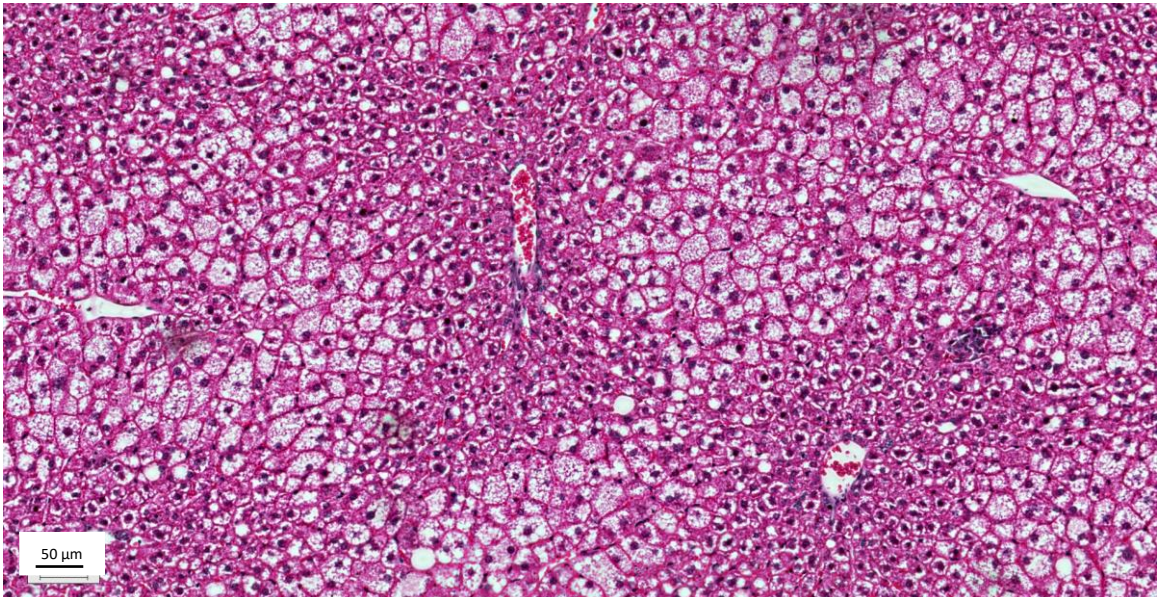



# HFHCD-C-4

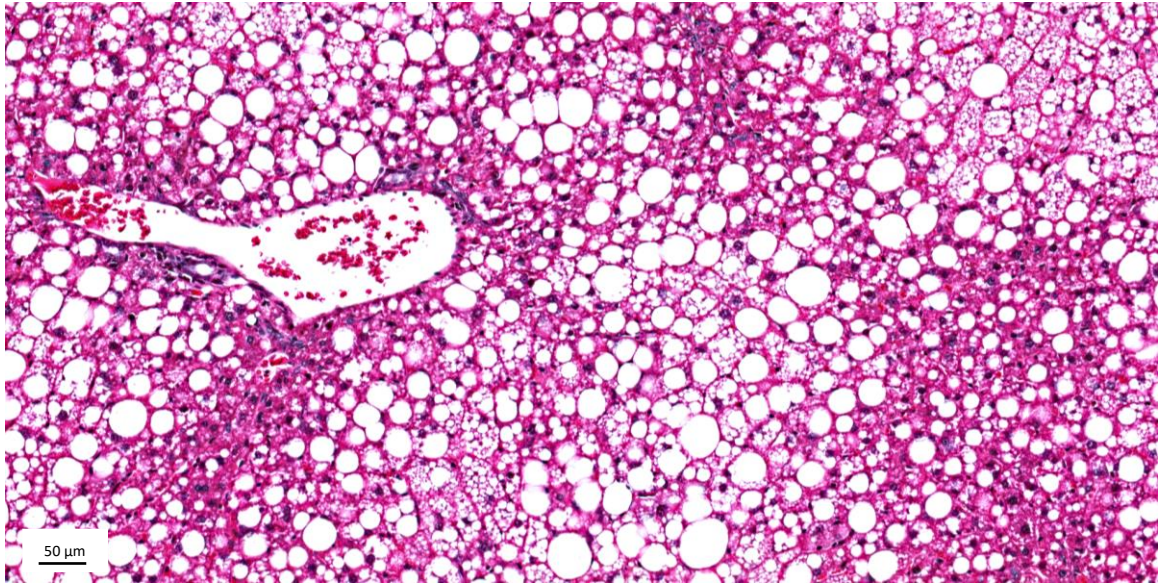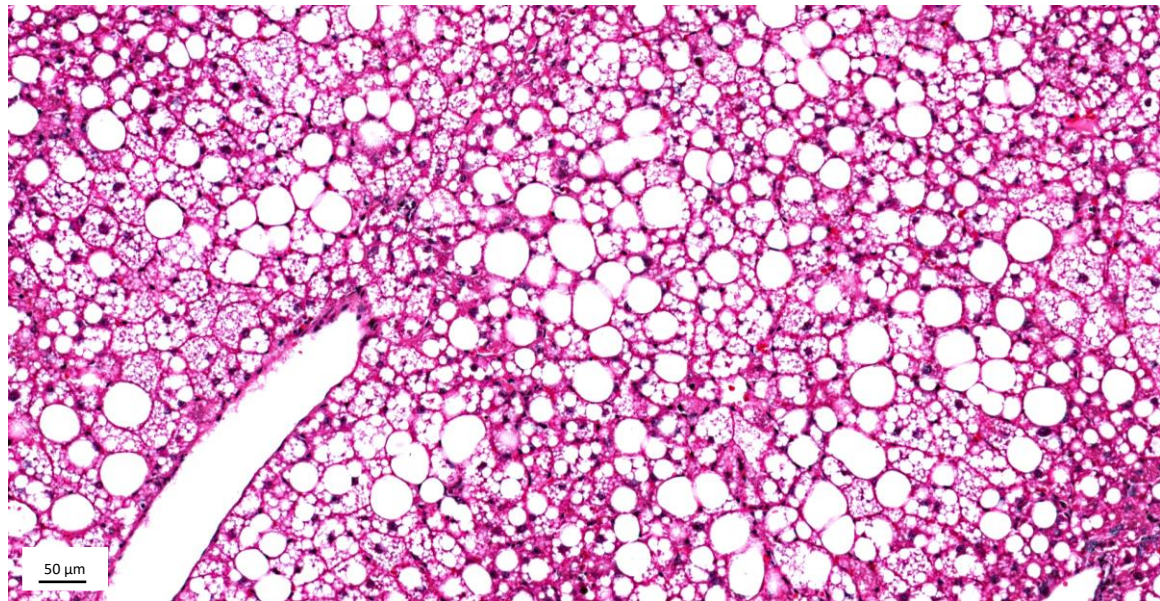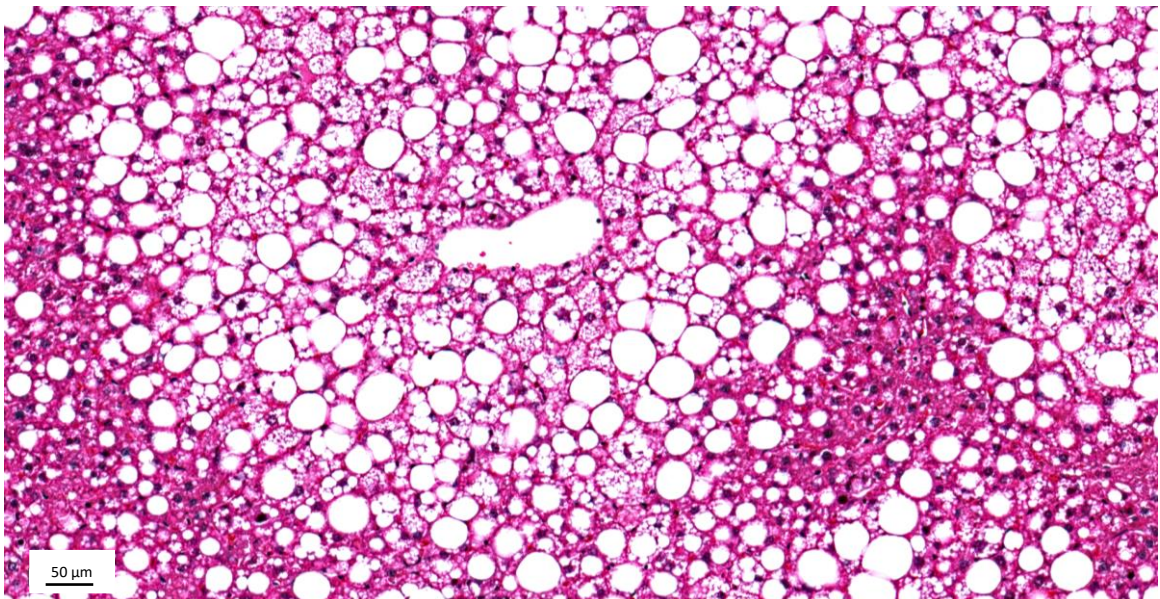



# HFHCD-C-5

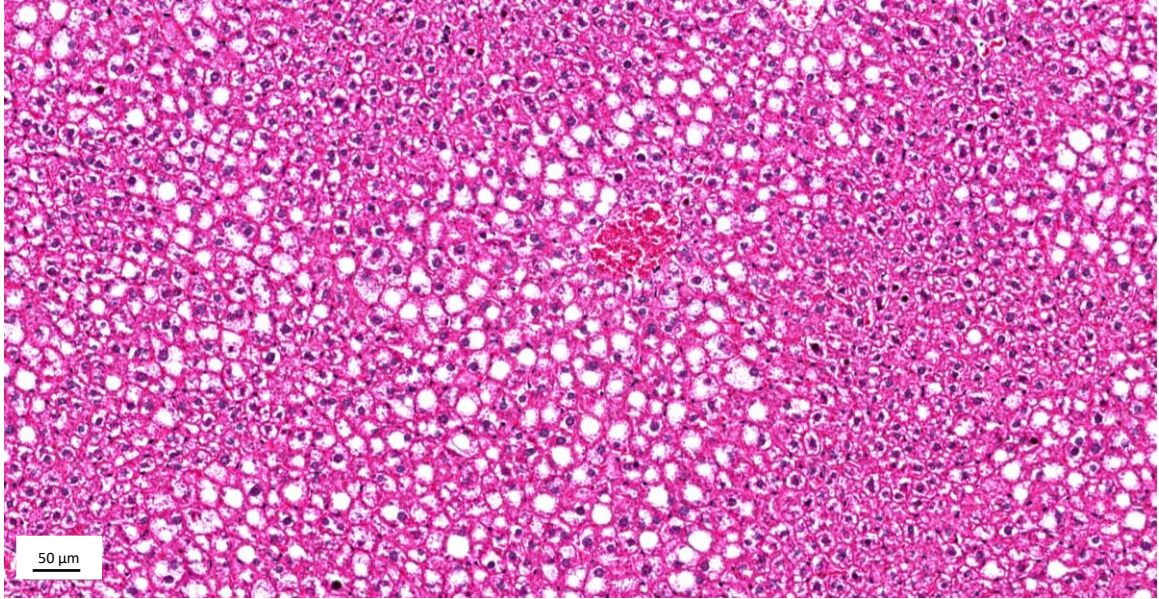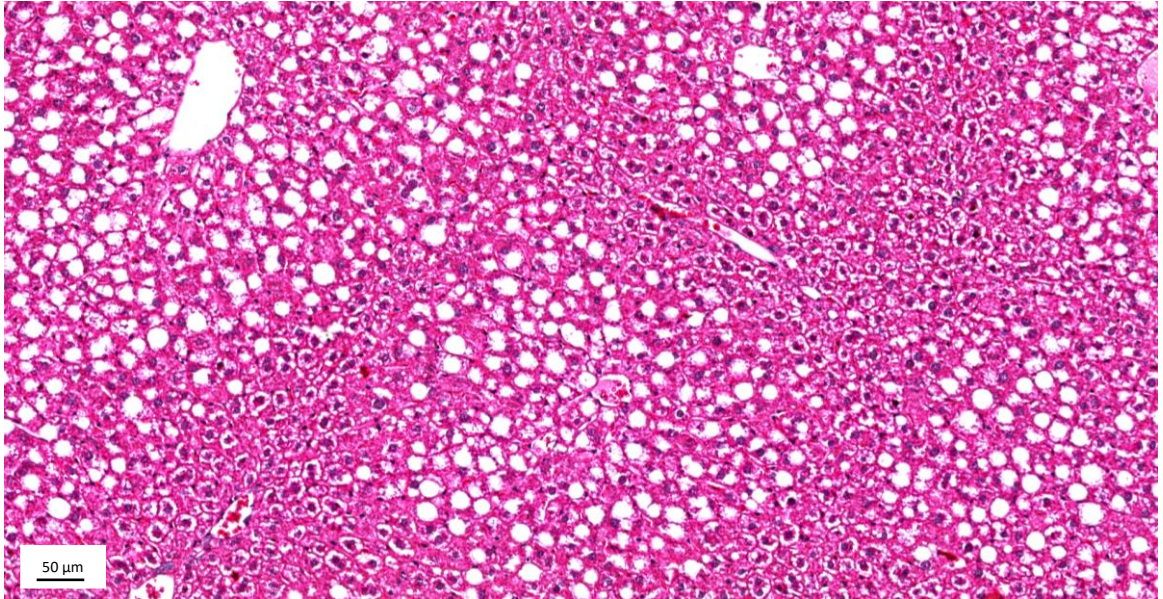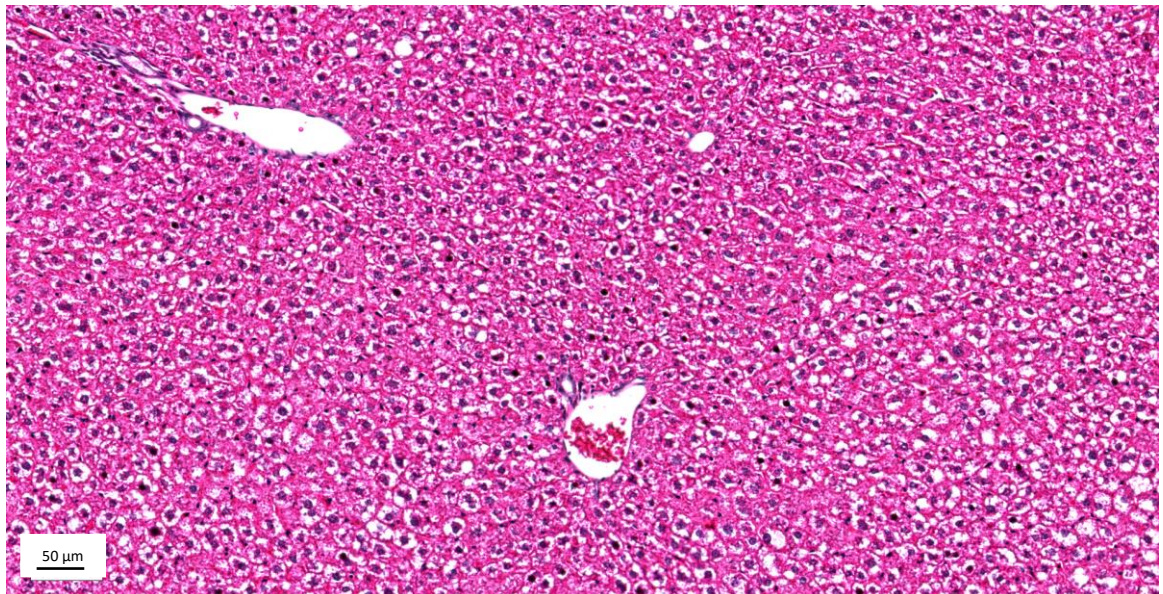



# HFHCD-C-6

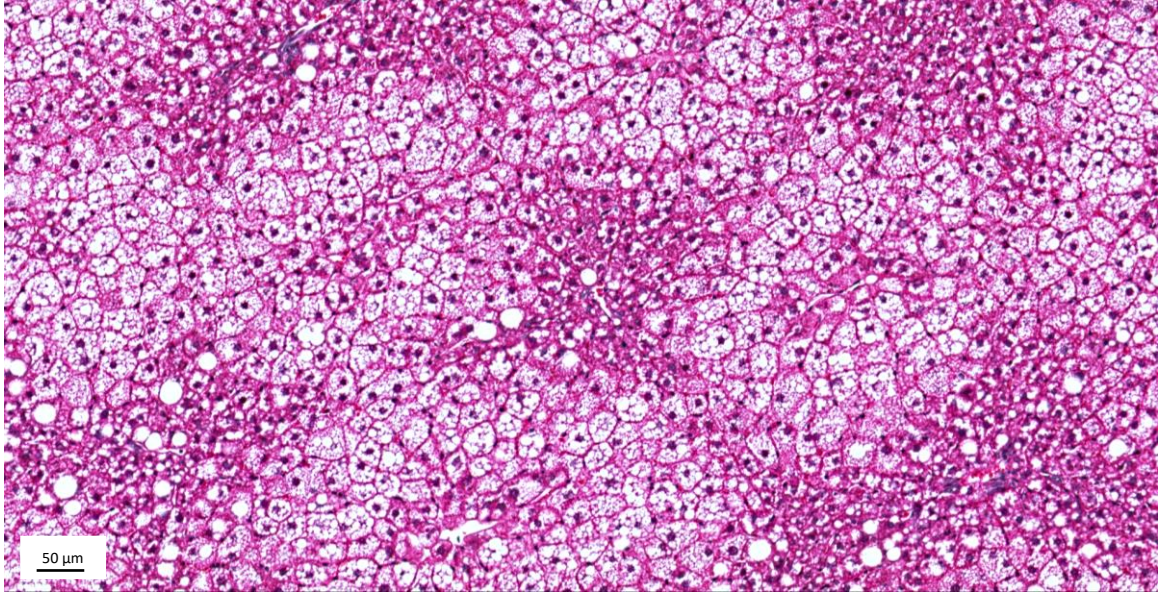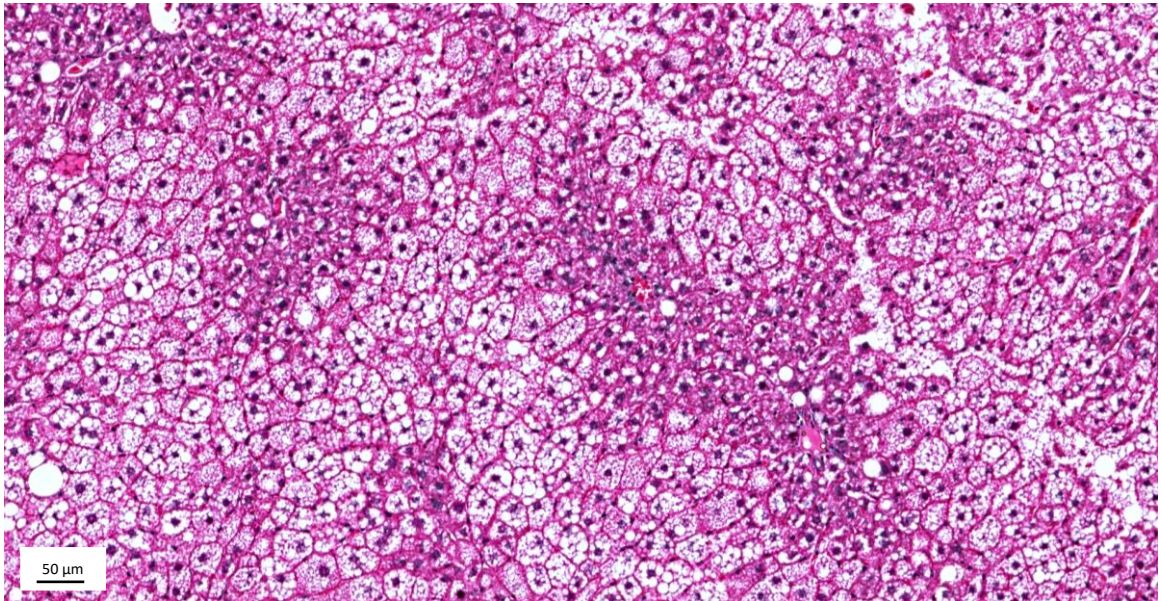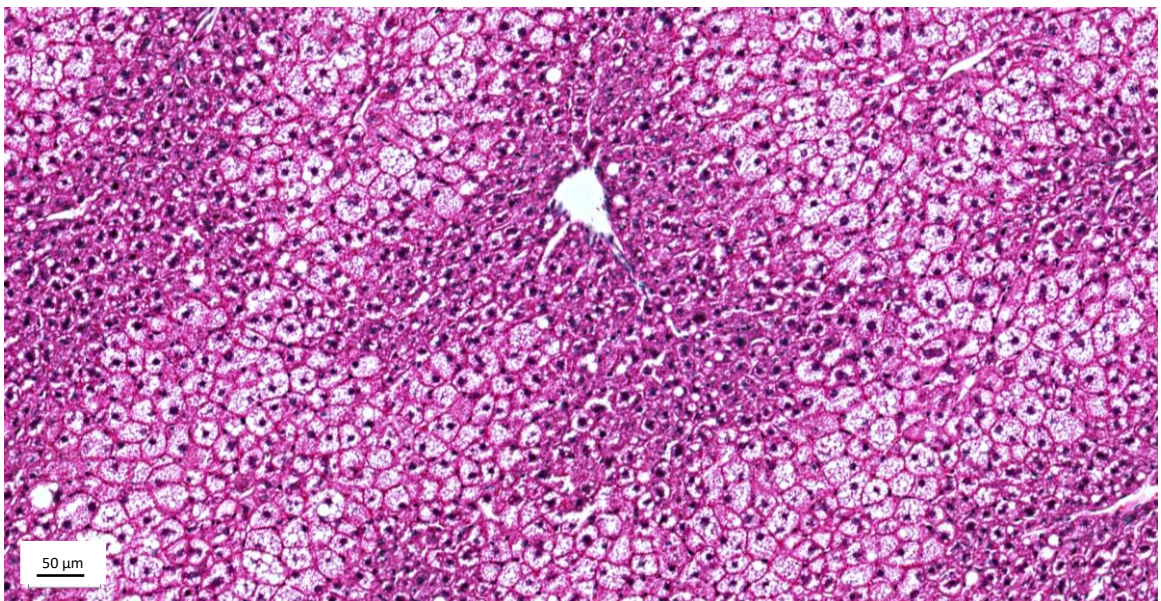



# HFHCD-C-7

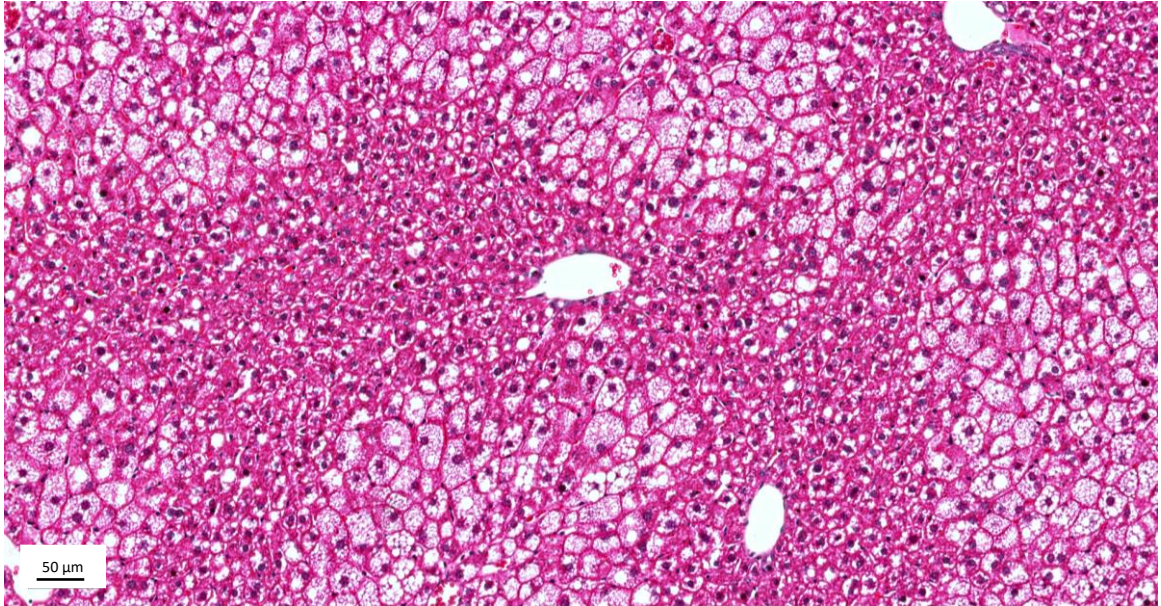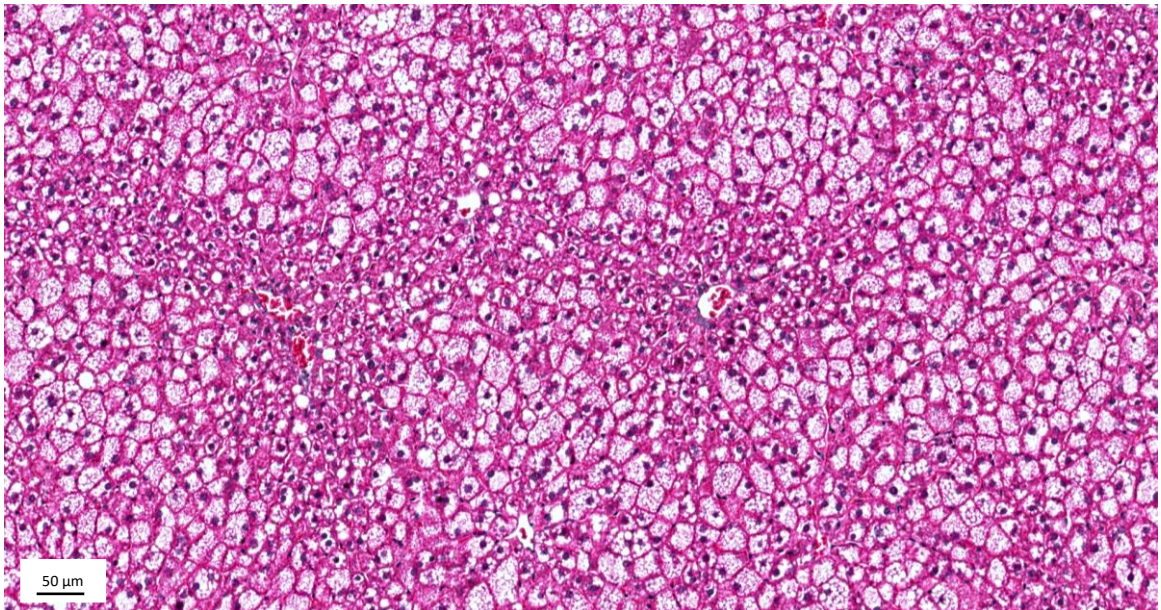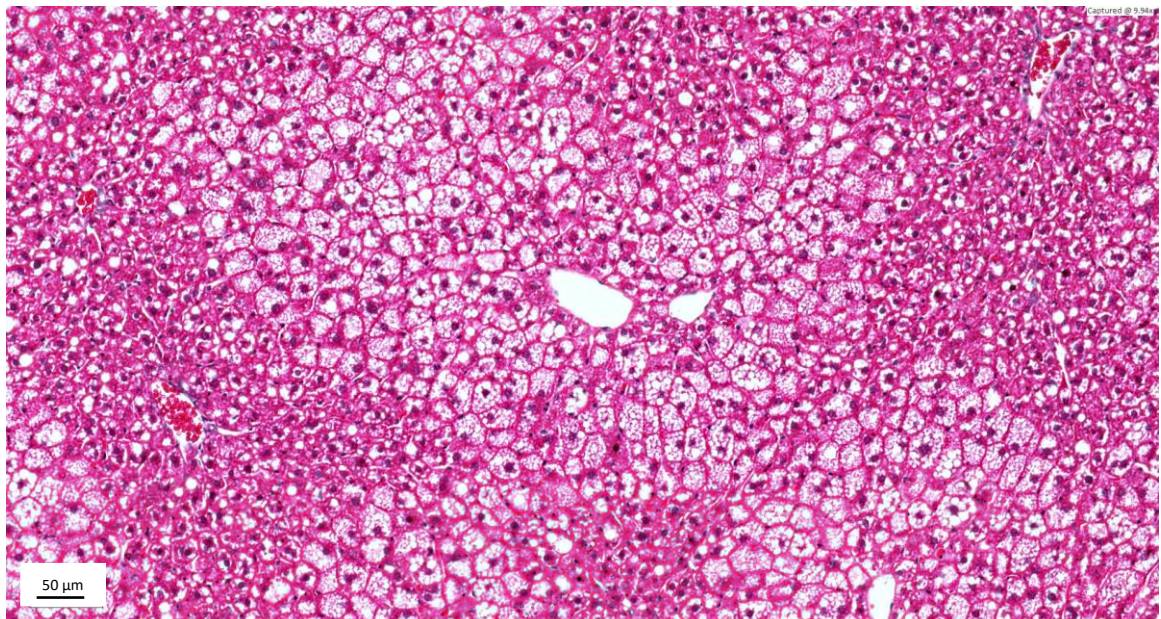



# HFHCD-C-8

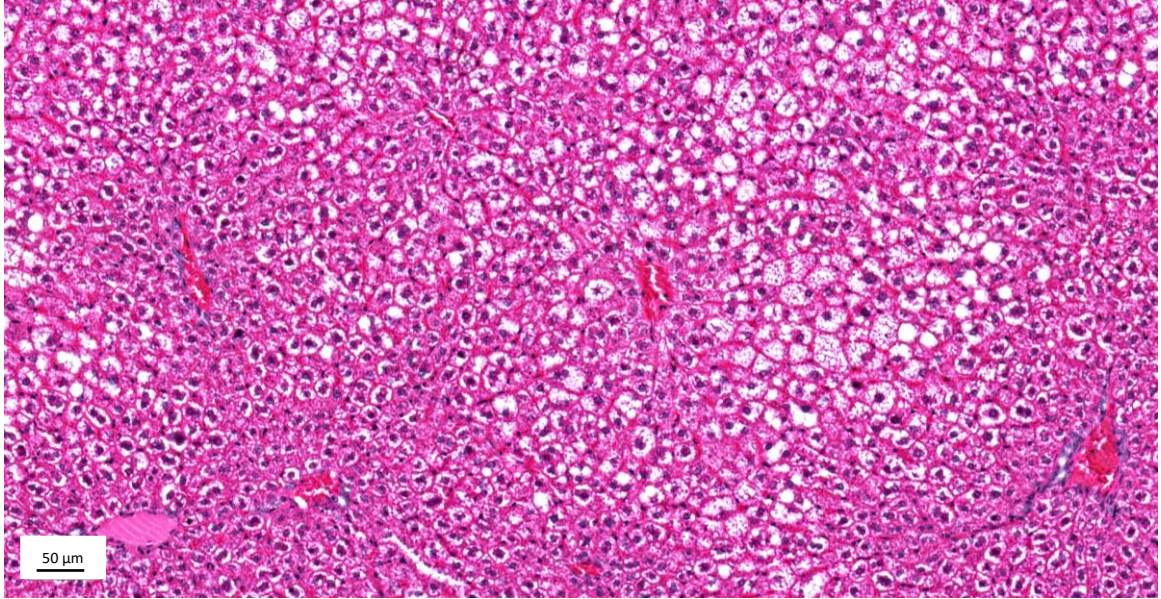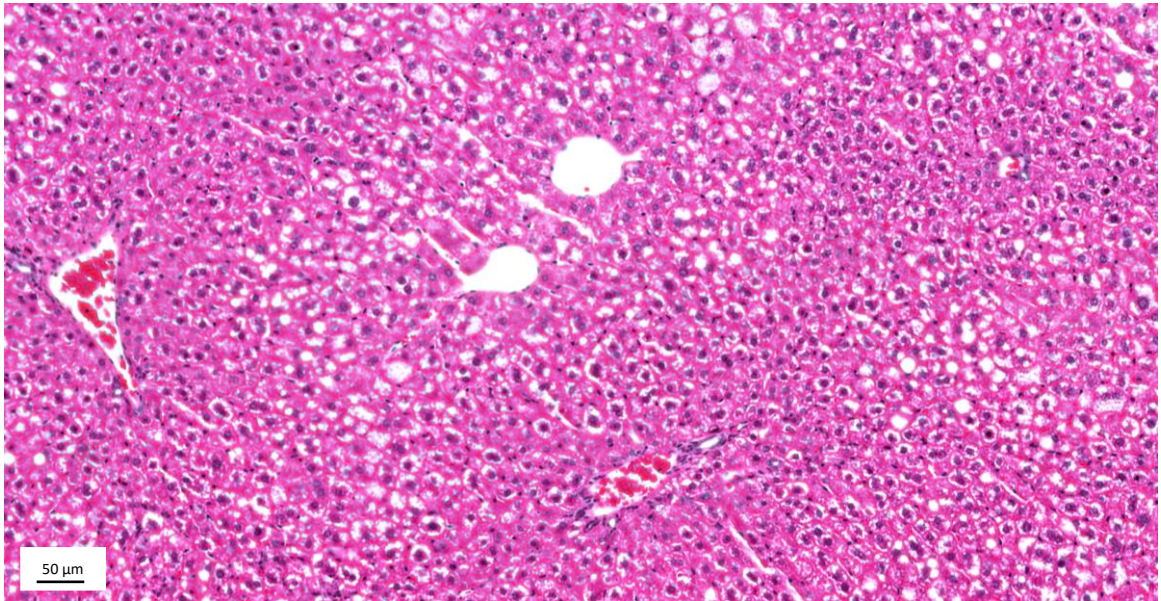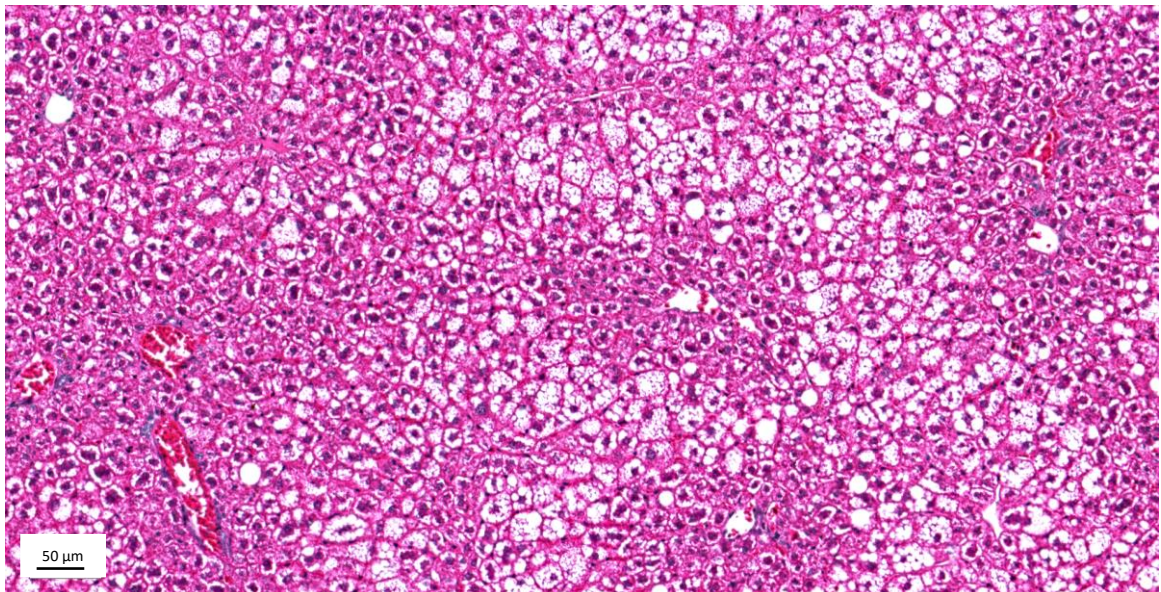



# HFHCD-C-9

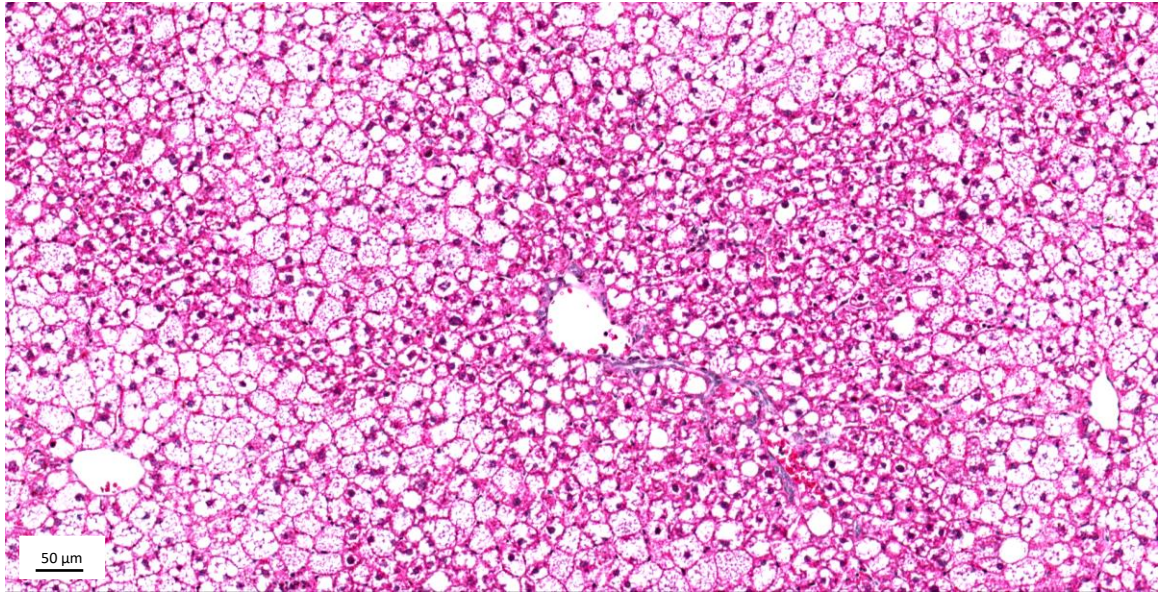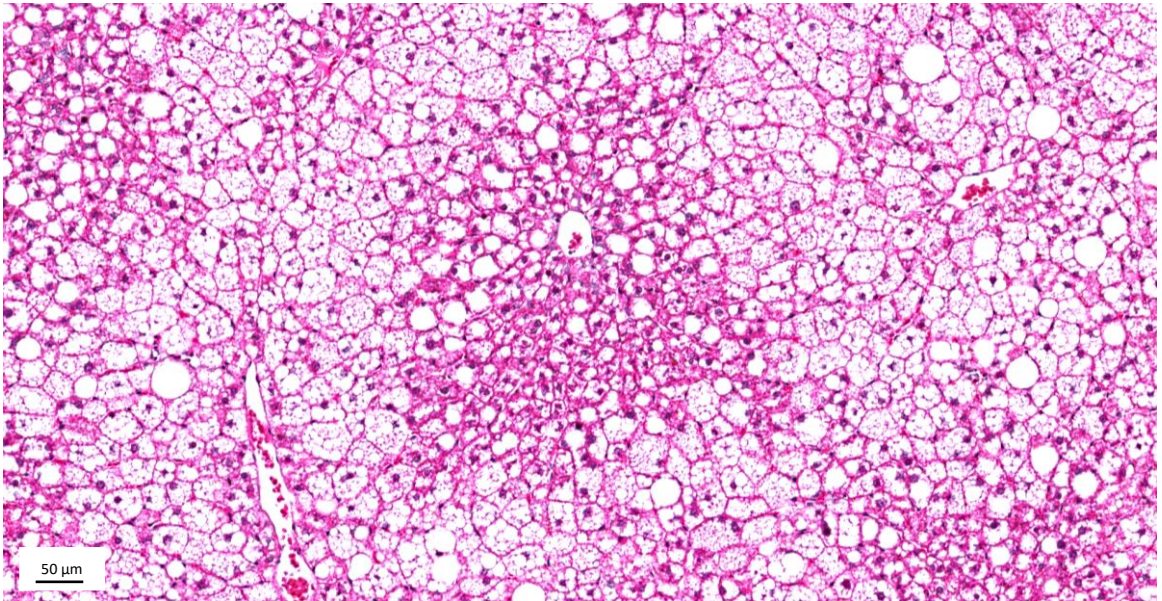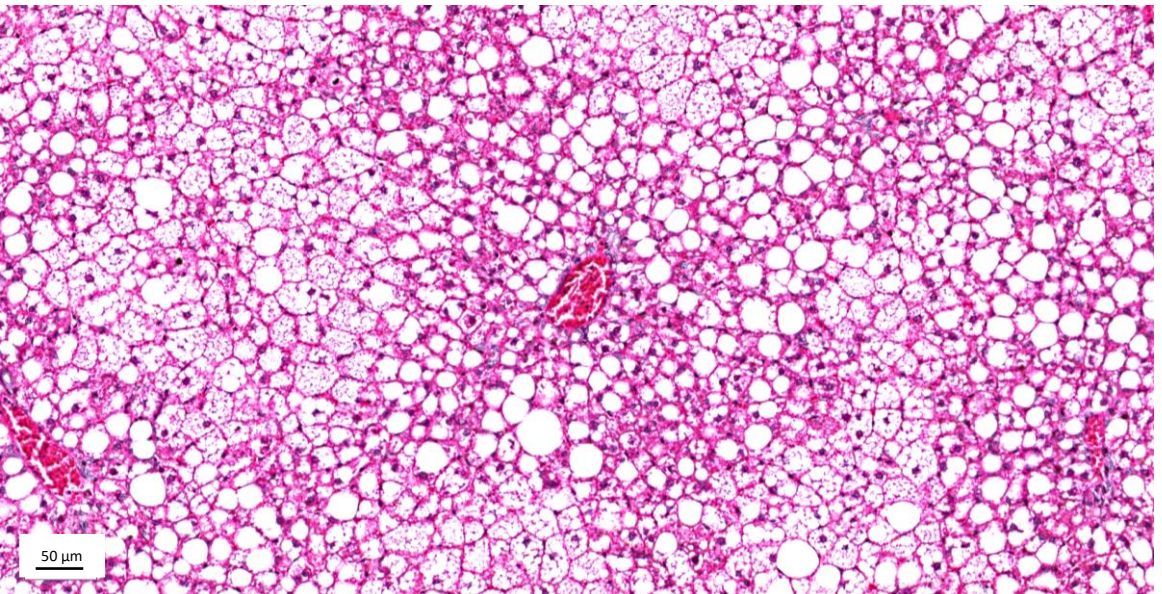



# HFHCD-C-10

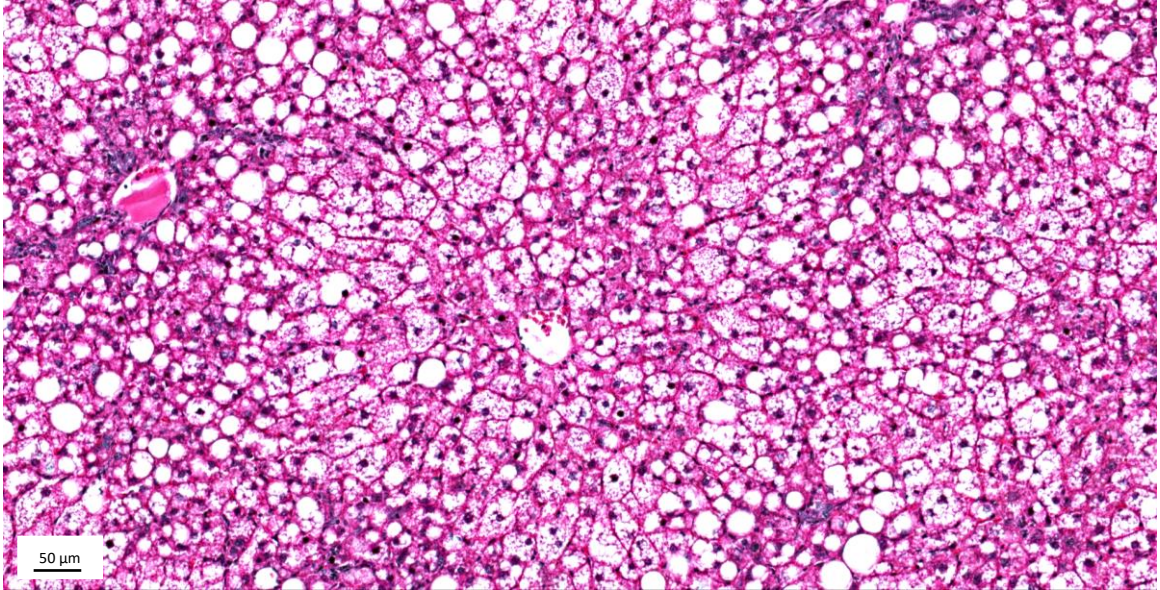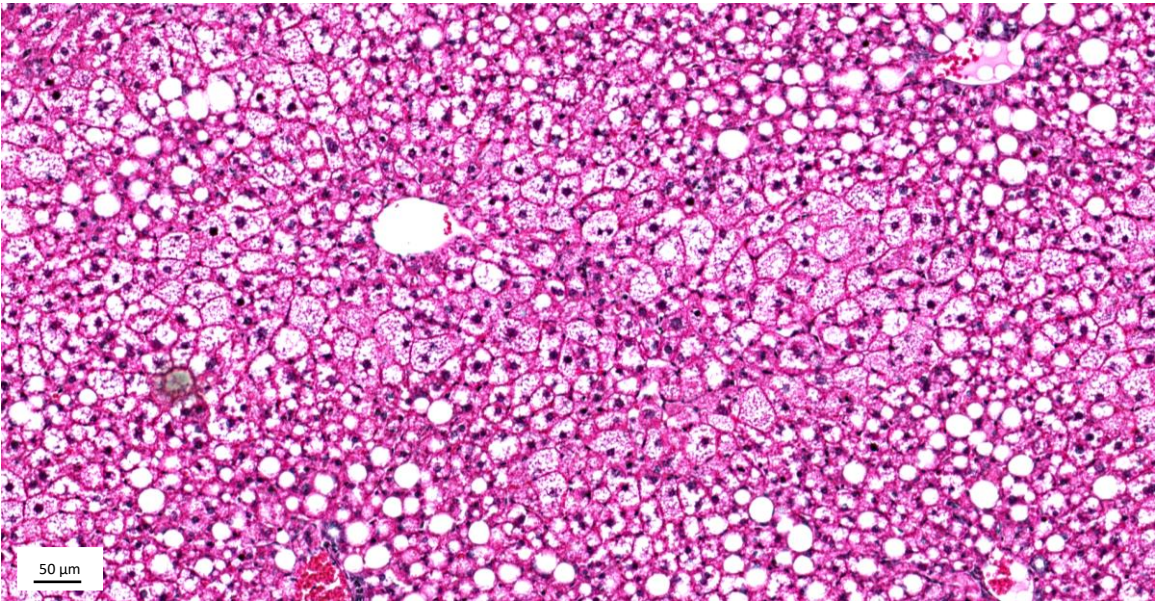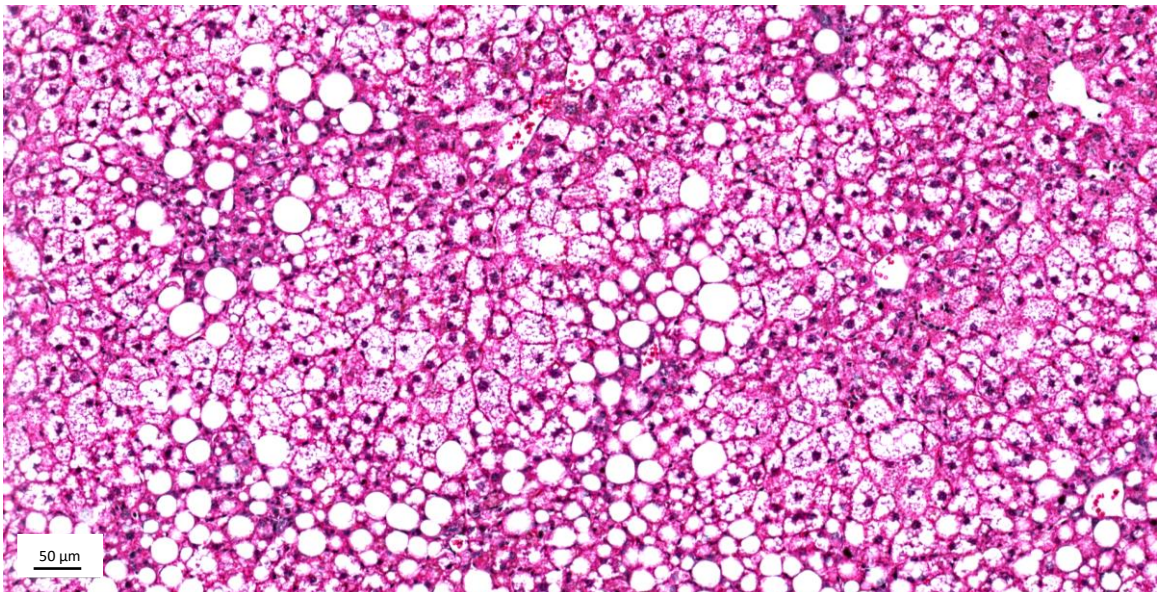



HFHCD-C-11

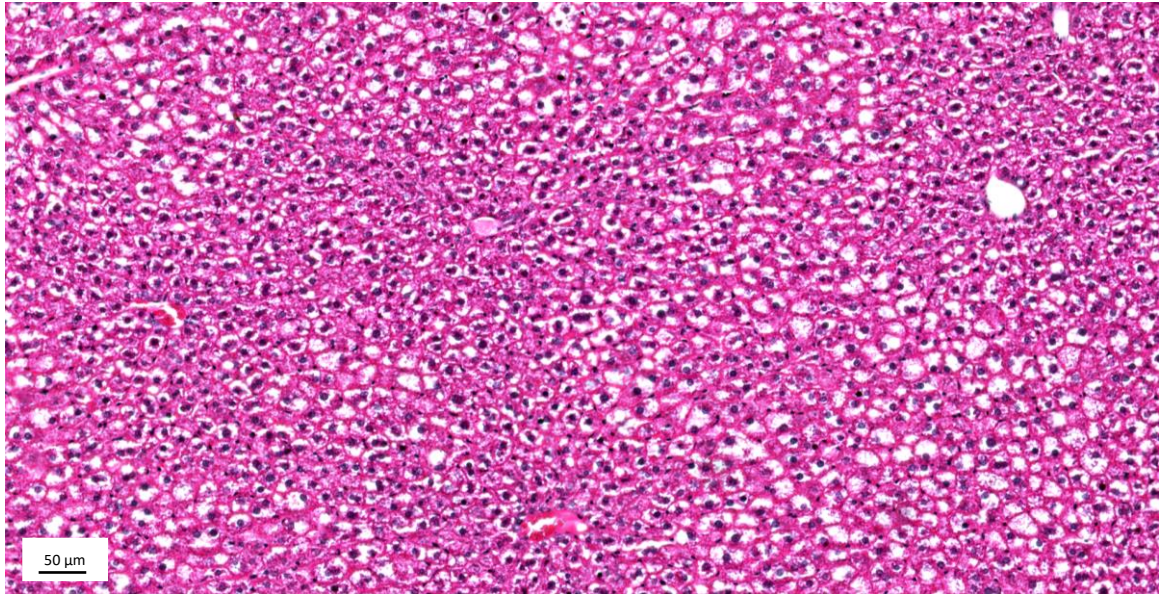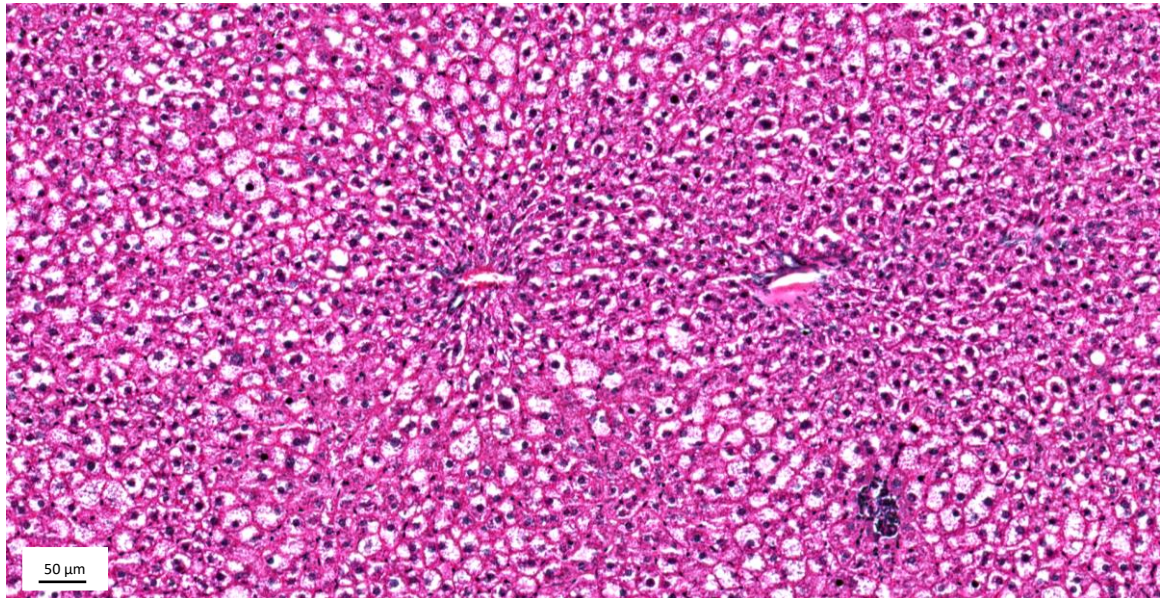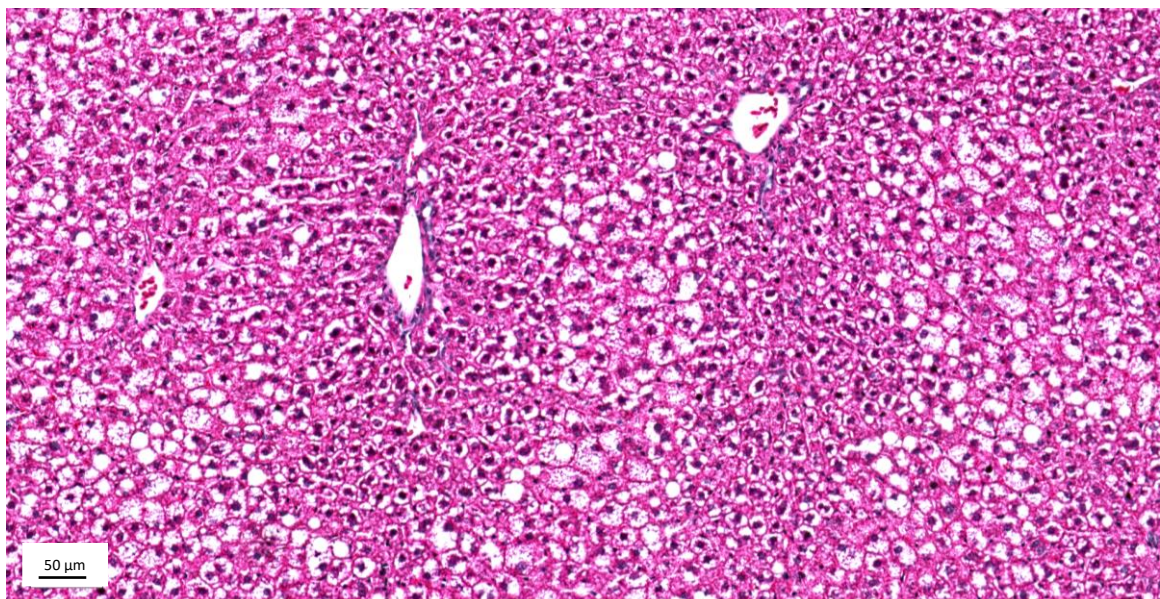



HFHCD-C-12

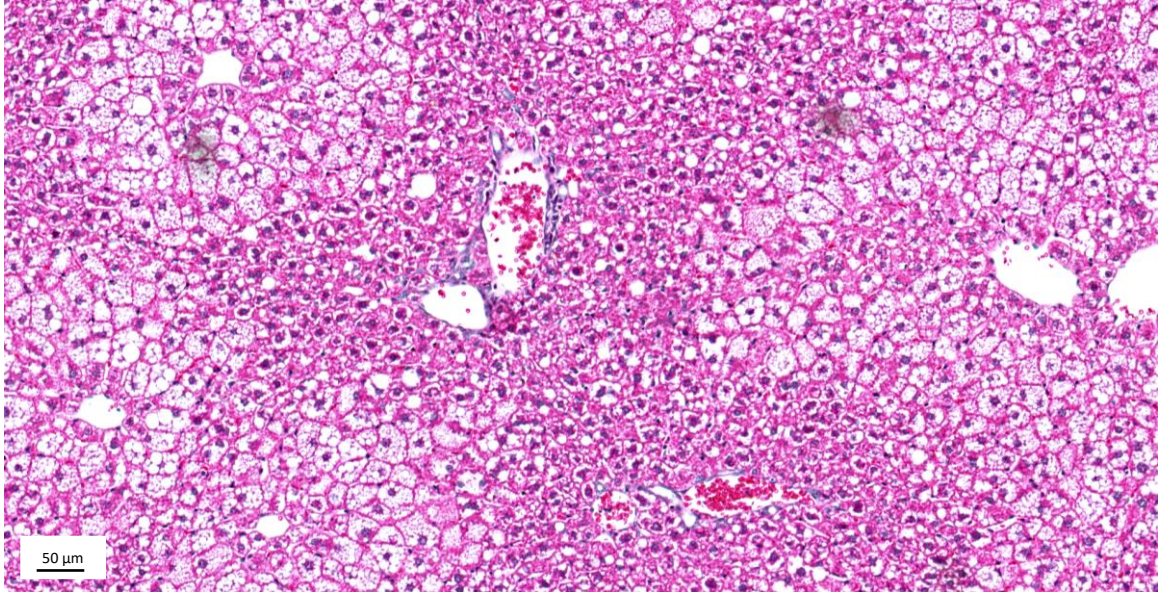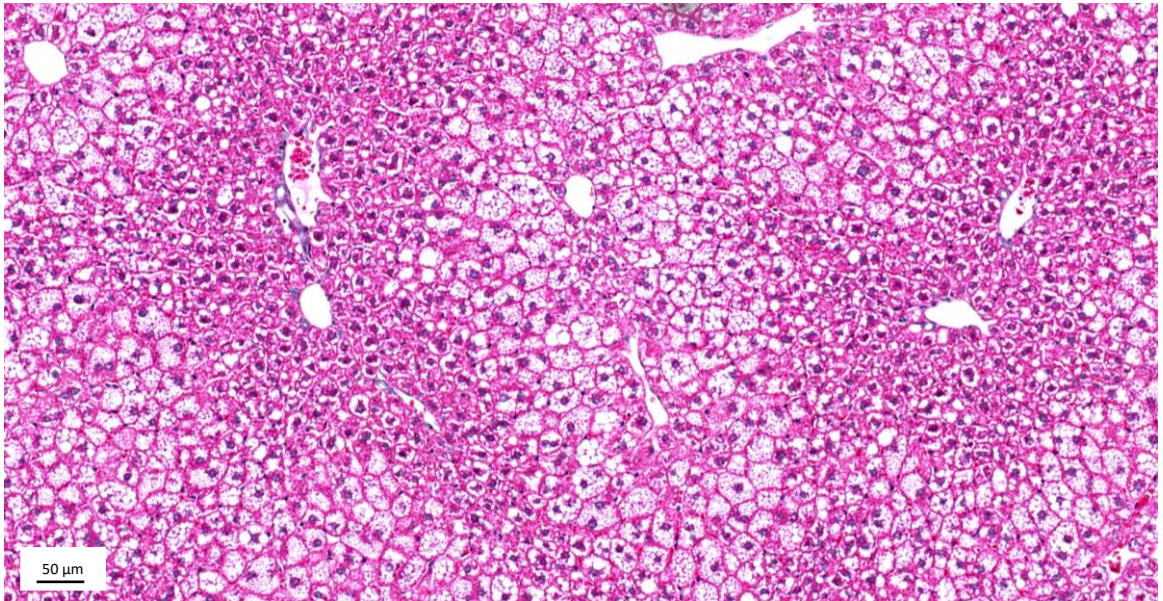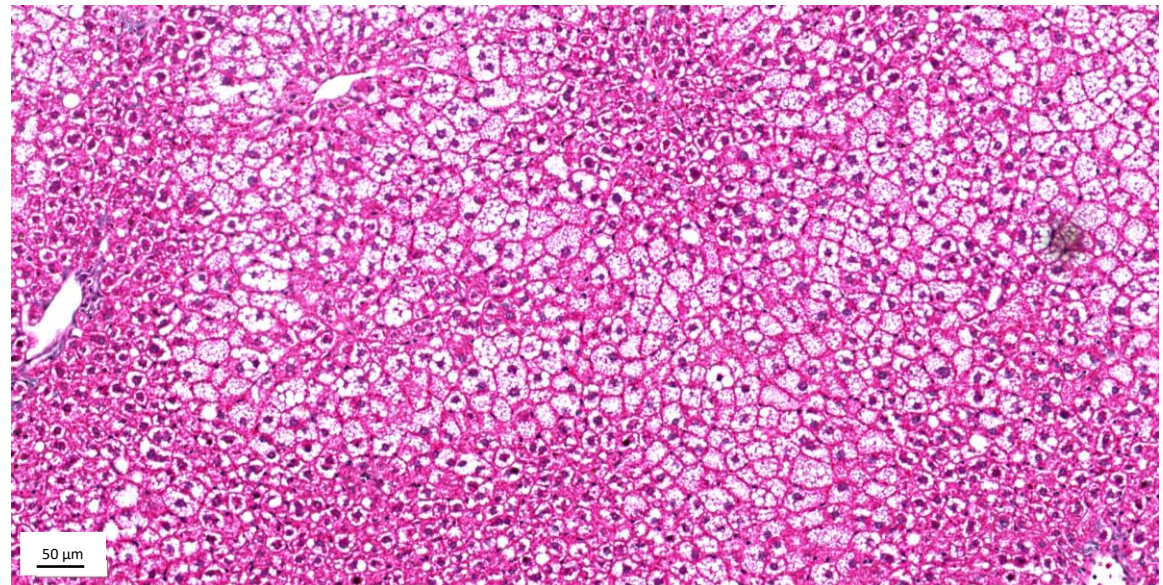



## **Sirius red Staining**

### **NCD group**

(7 mice were included)



# NCD-1

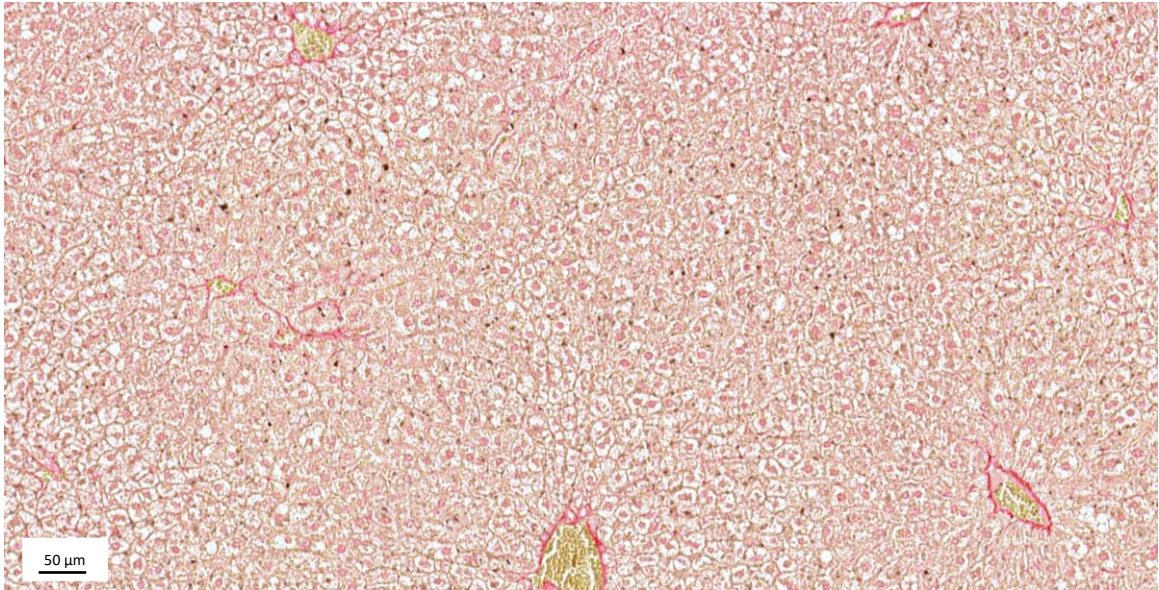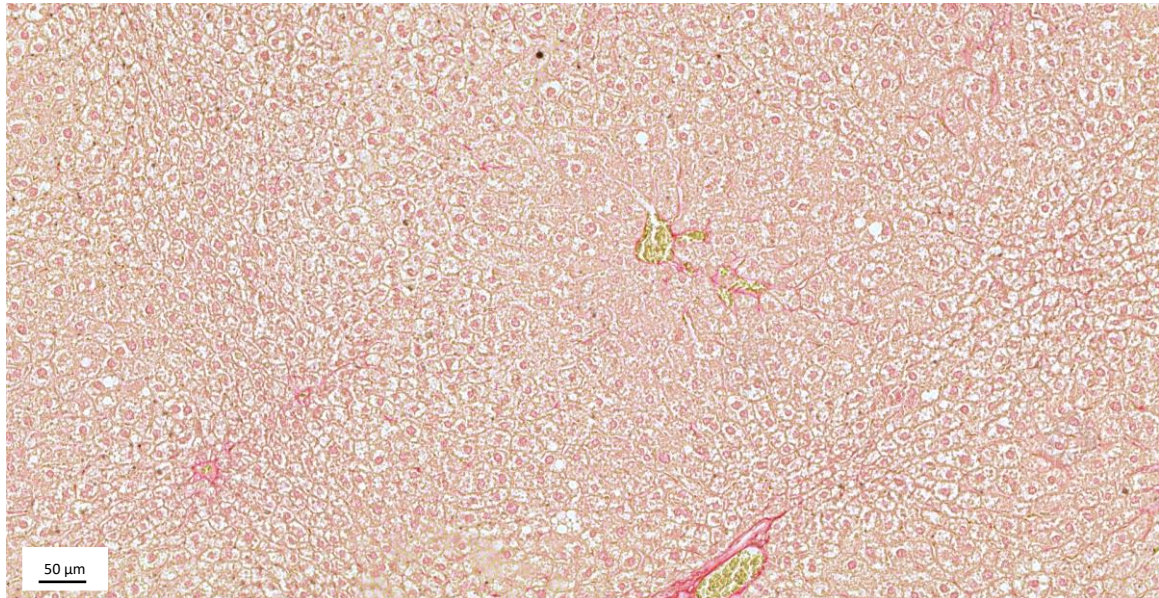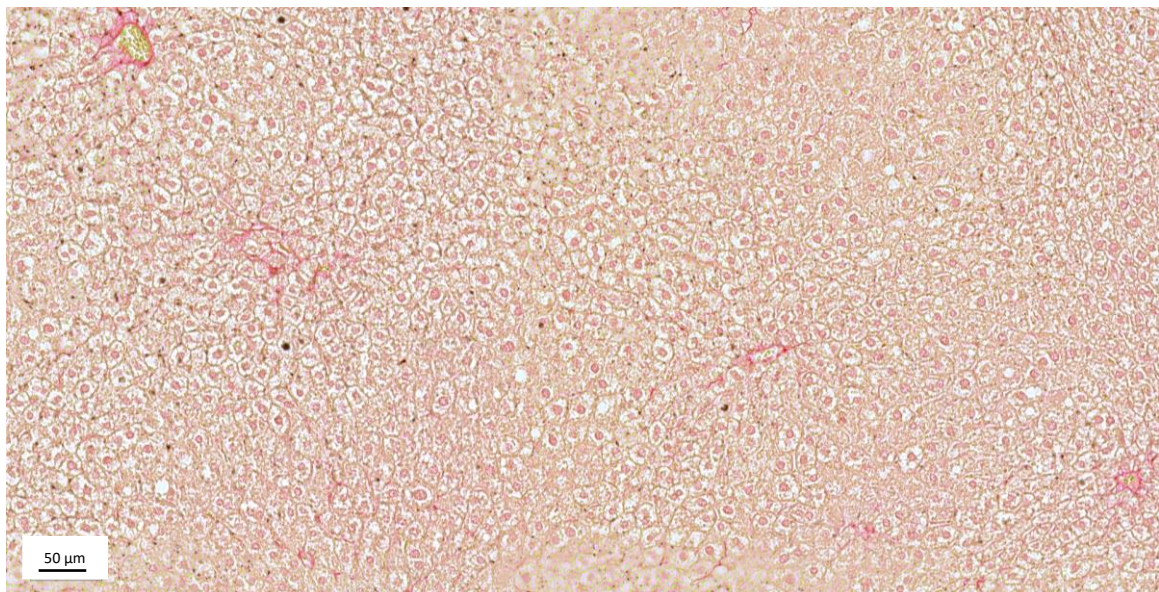



# NCD-2

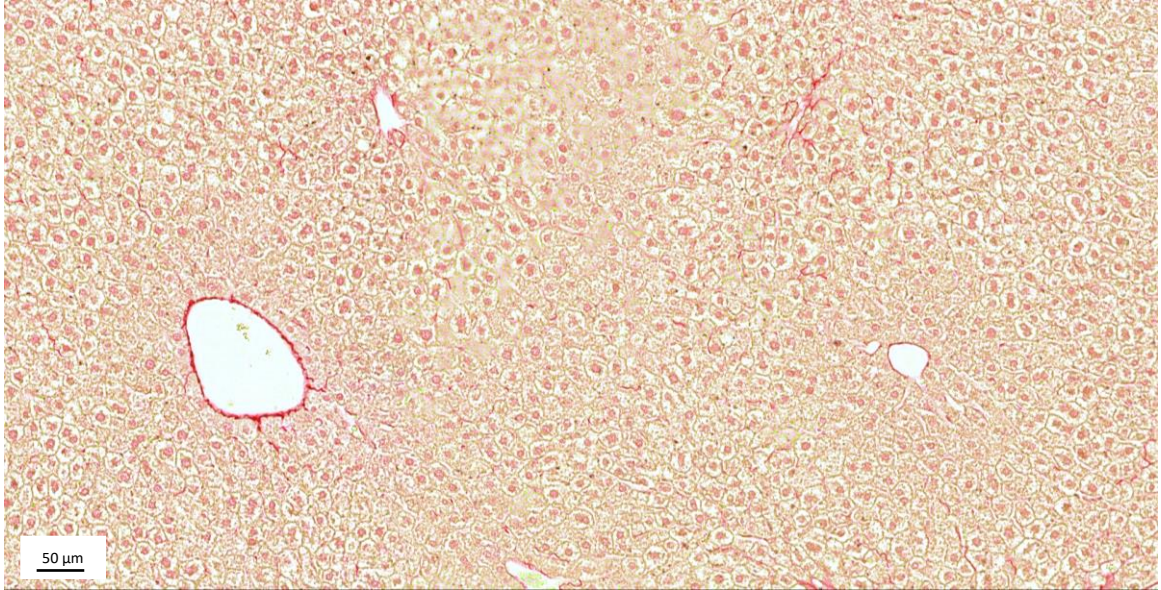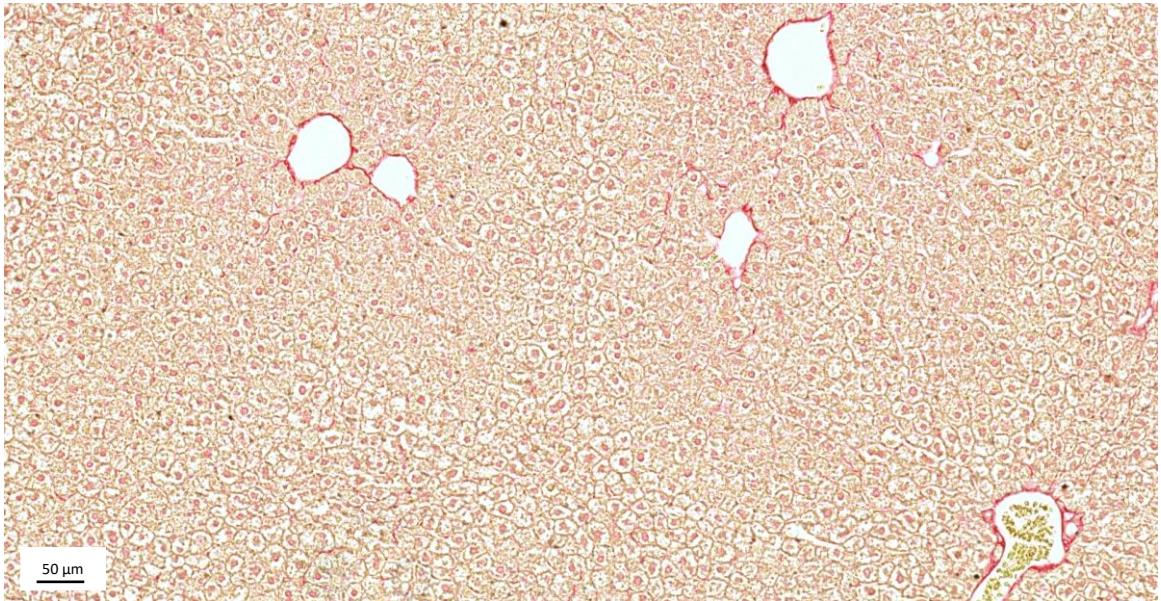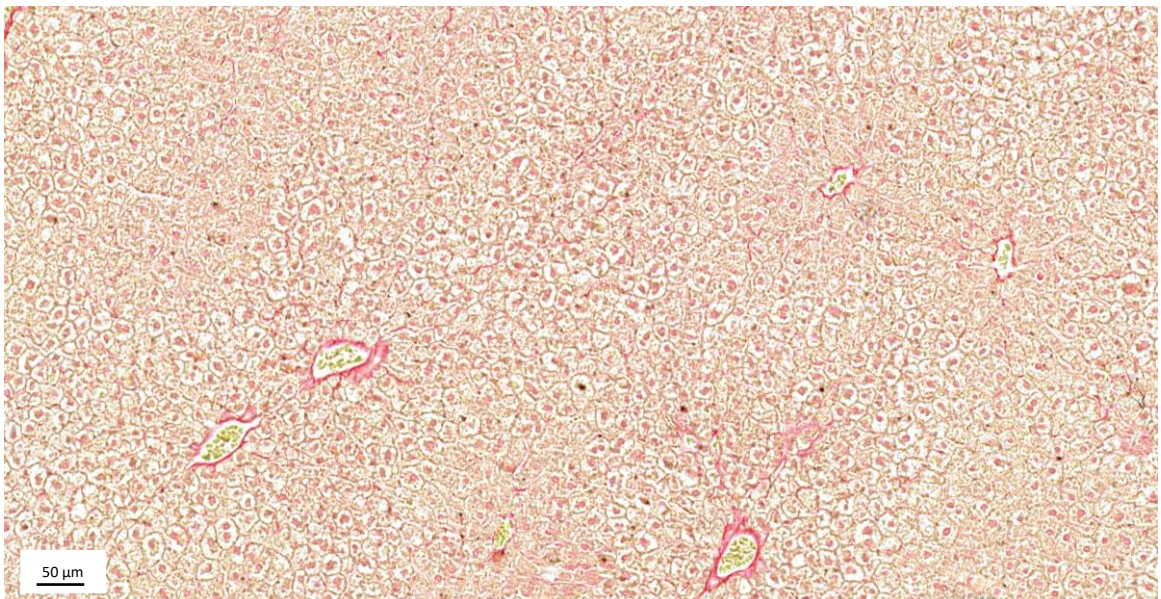



# NCD-3

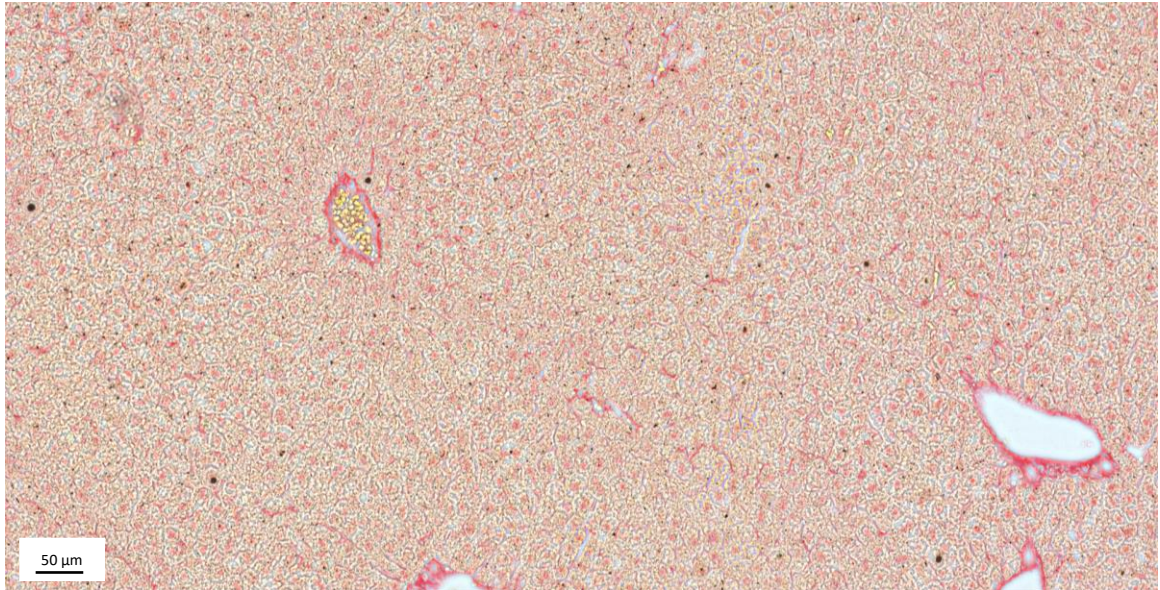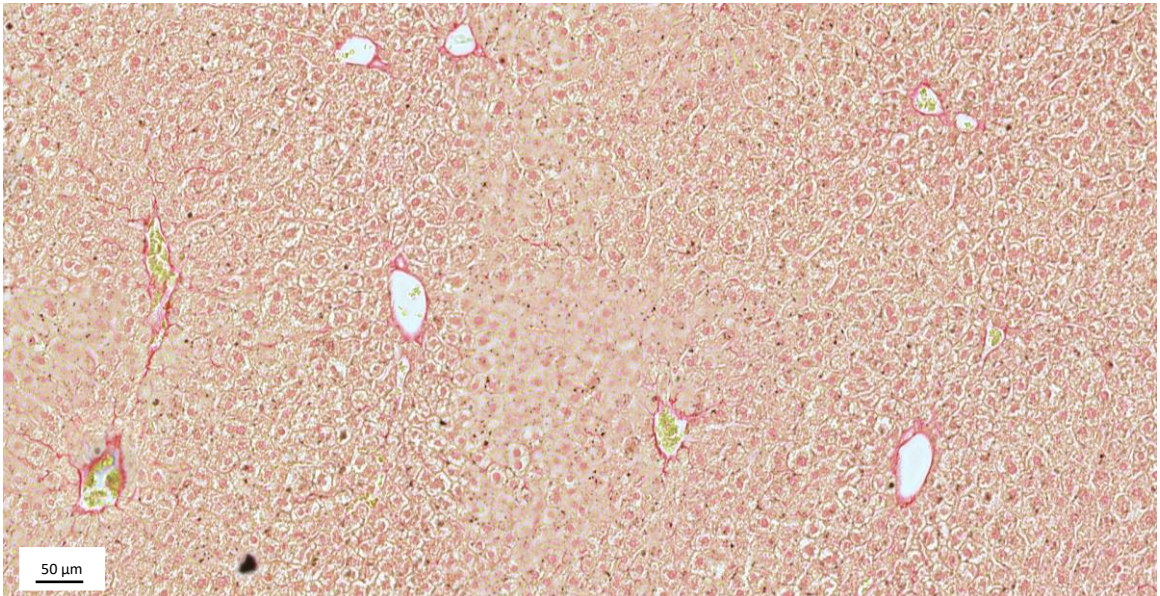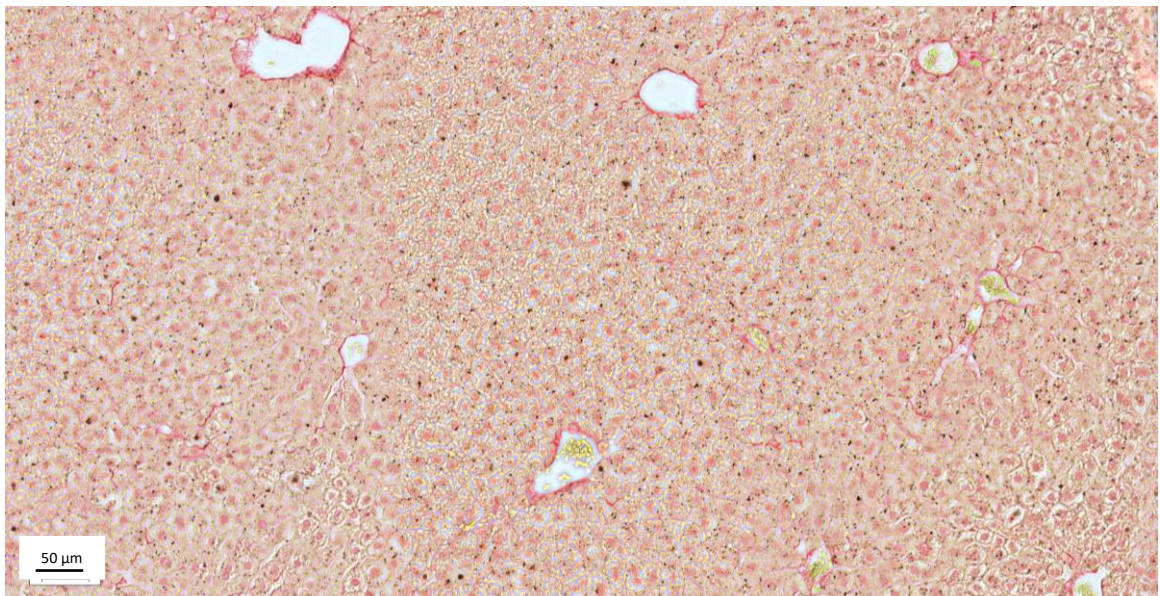



# NCD-4

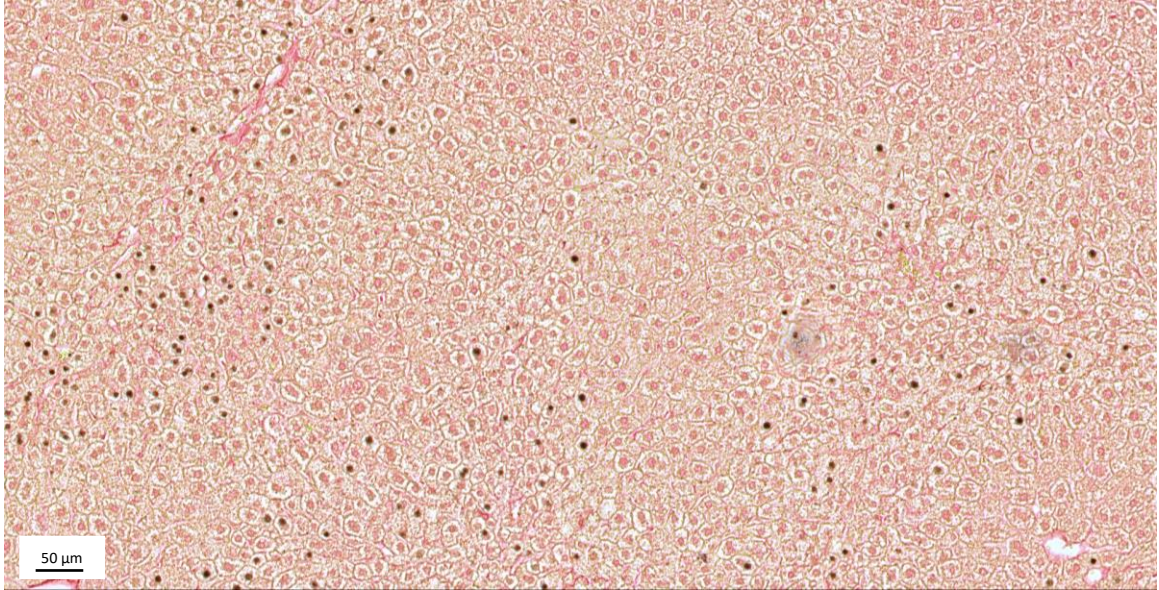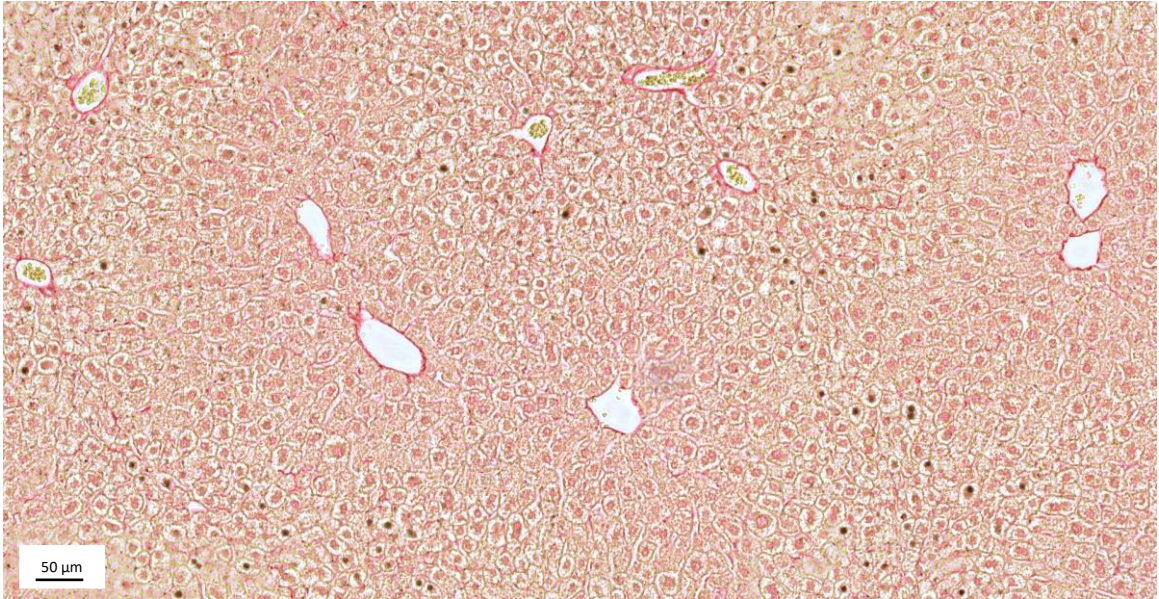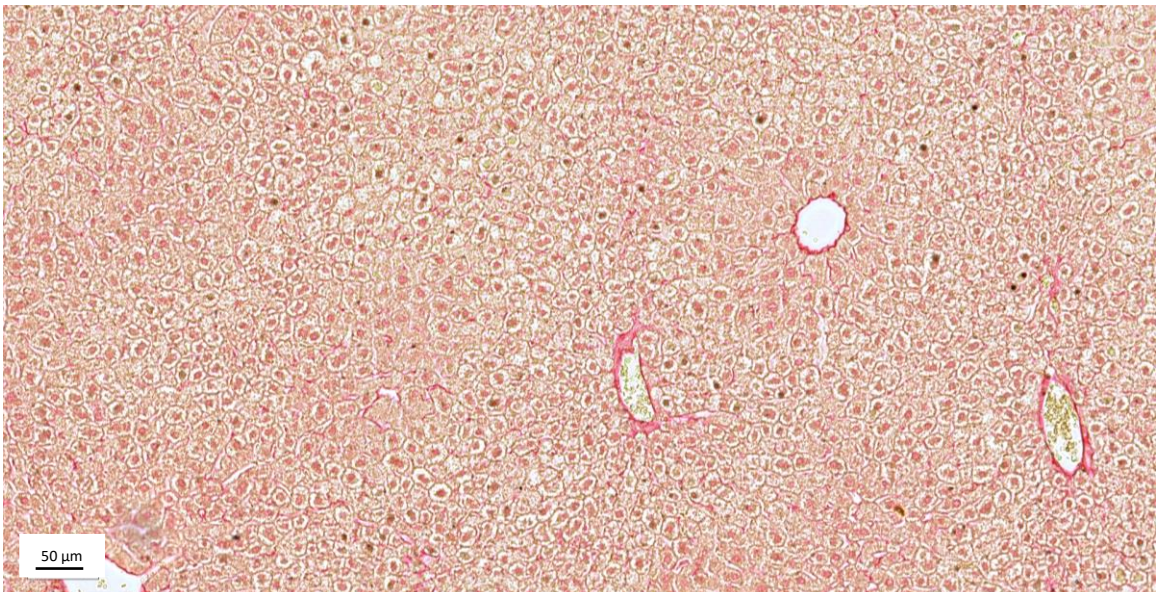



# NCD-5

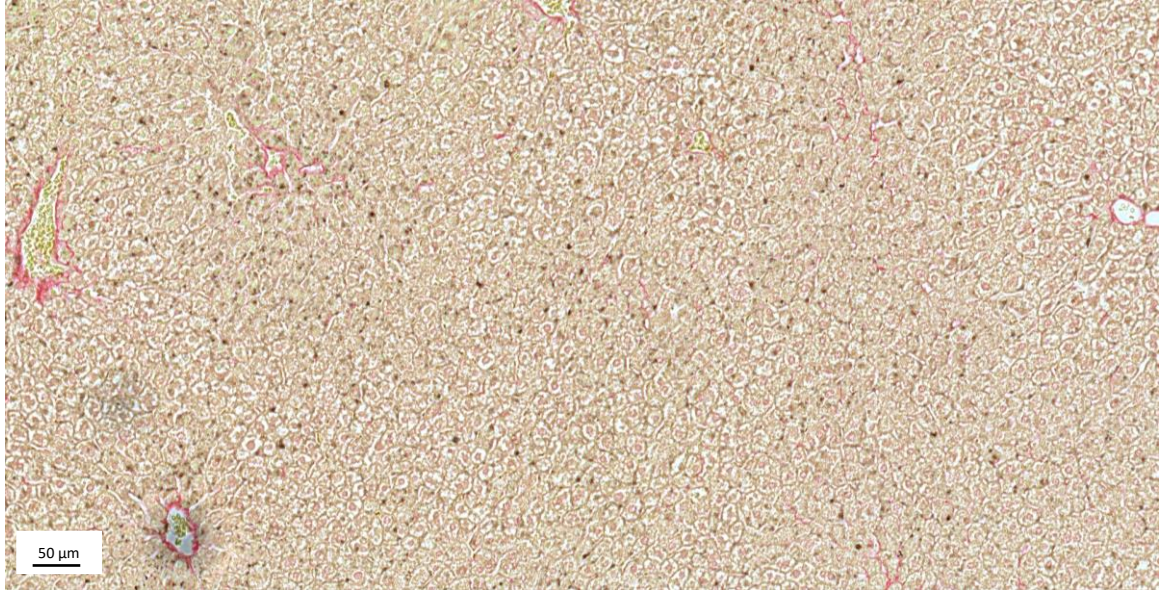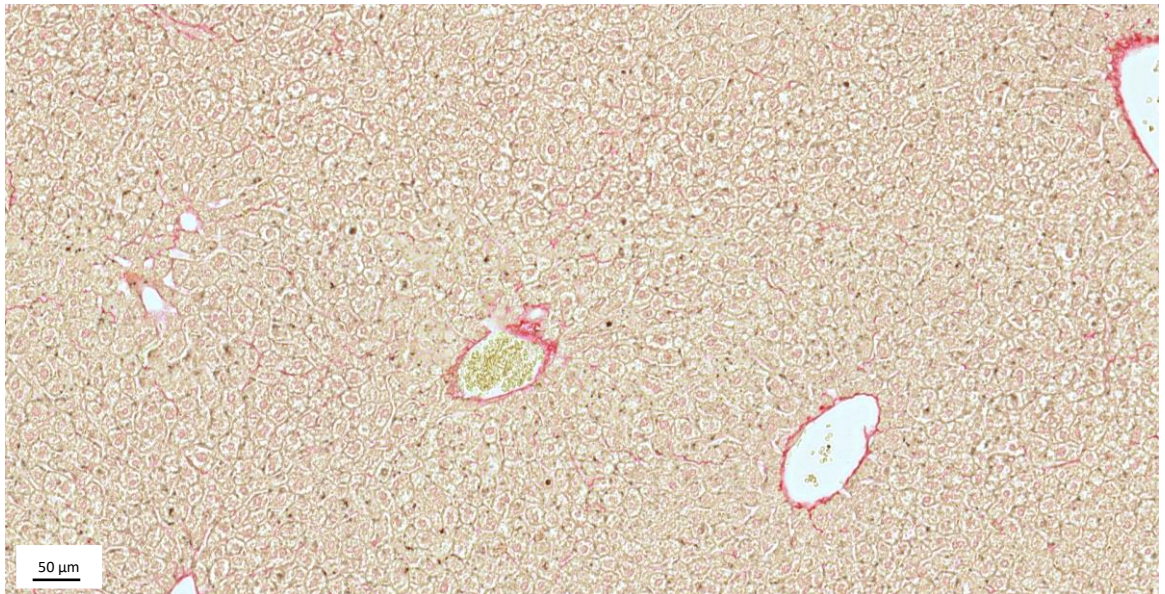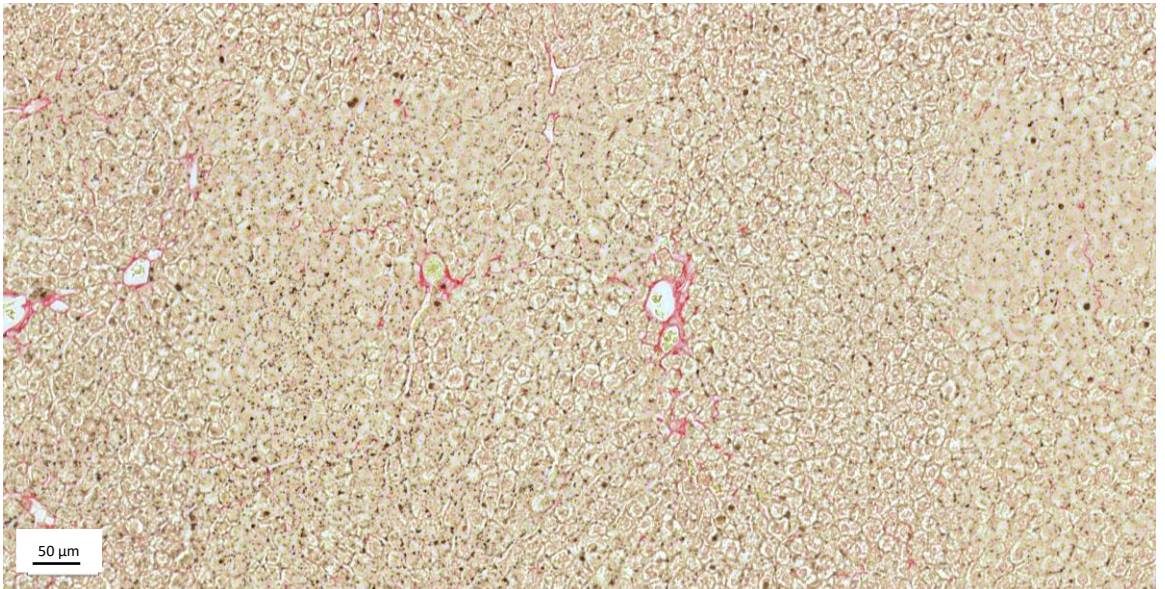



# NCD-6

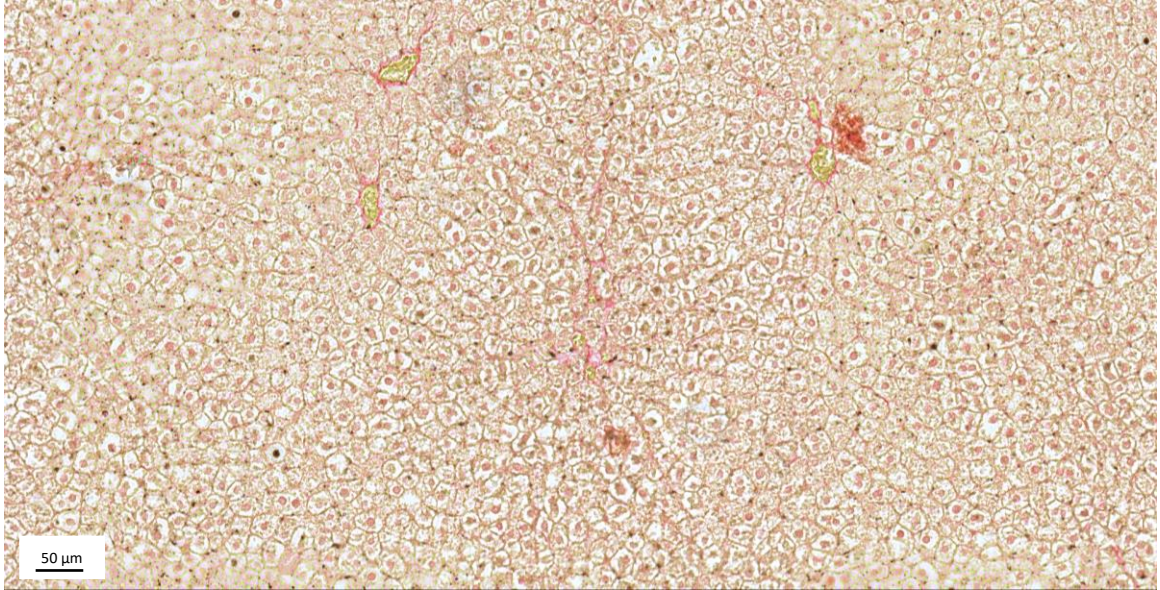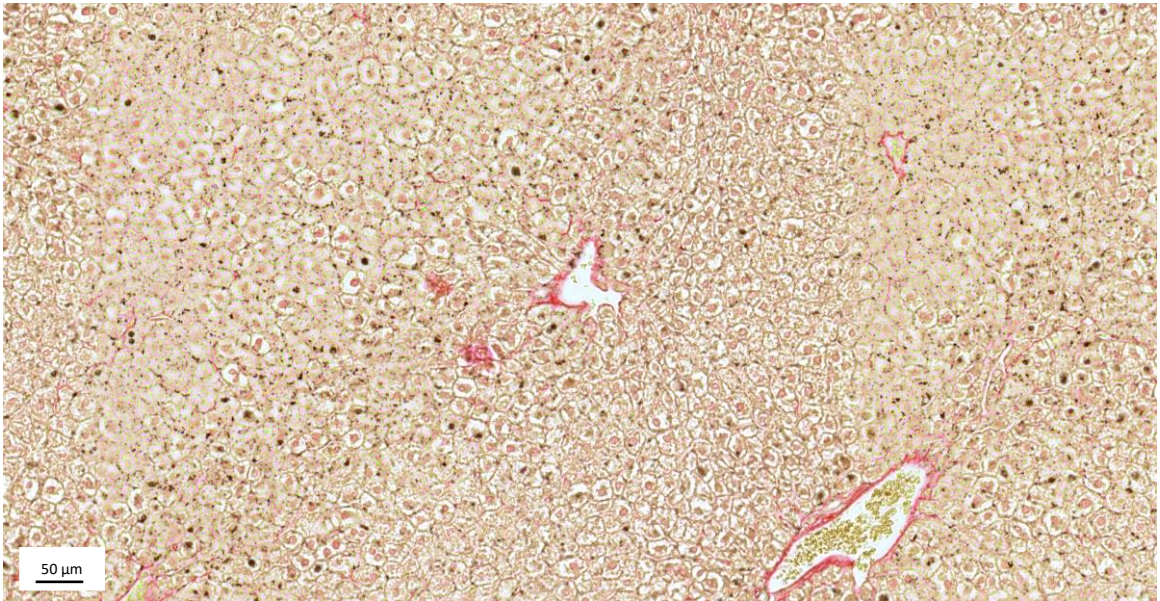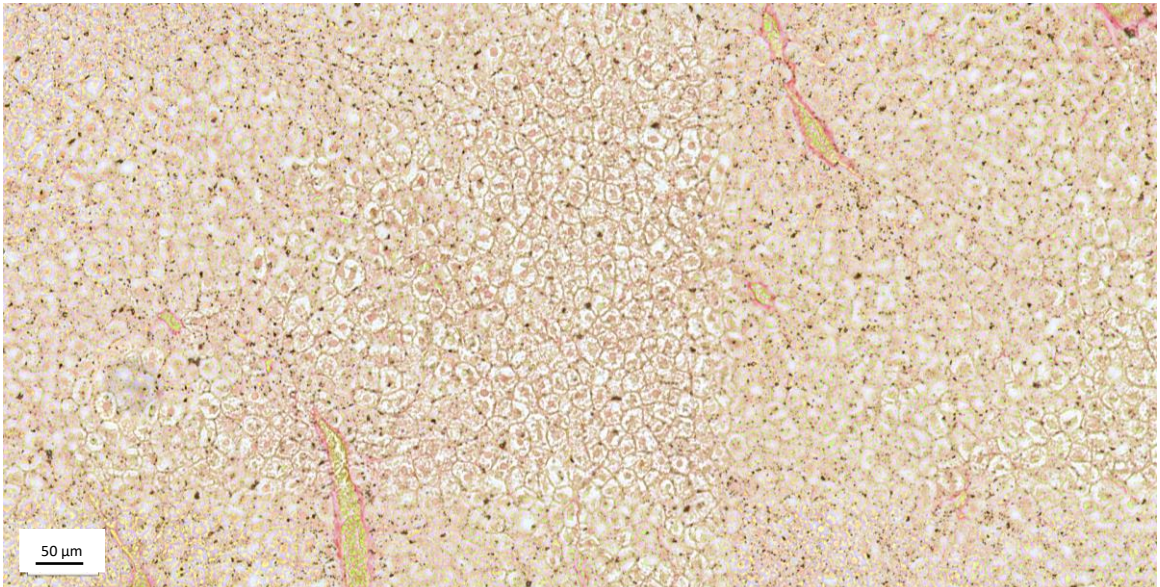



# NCD-7

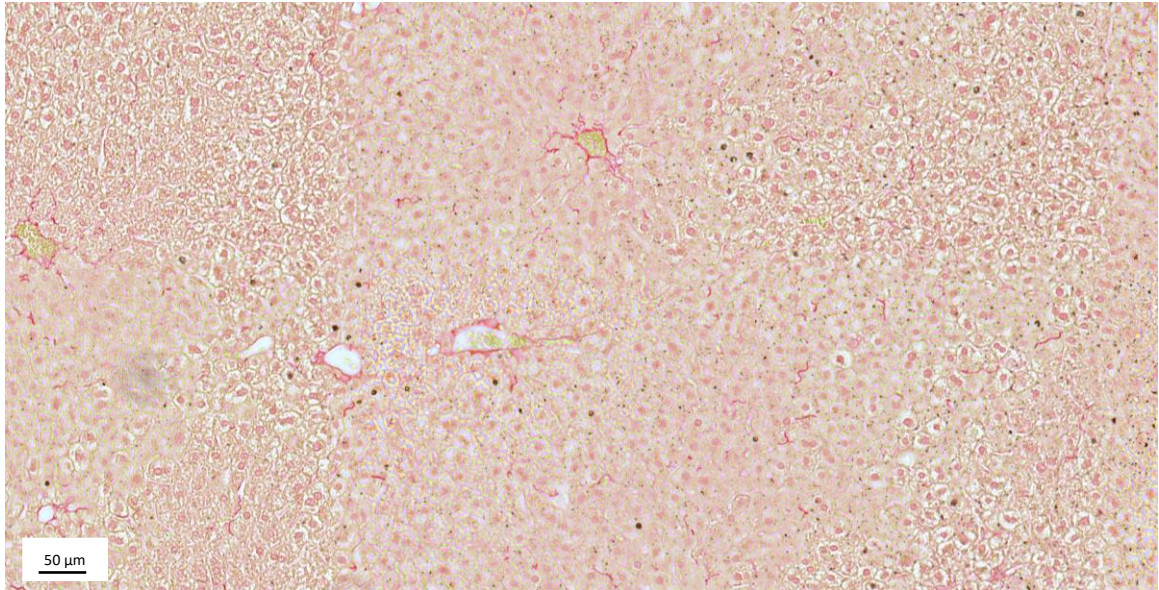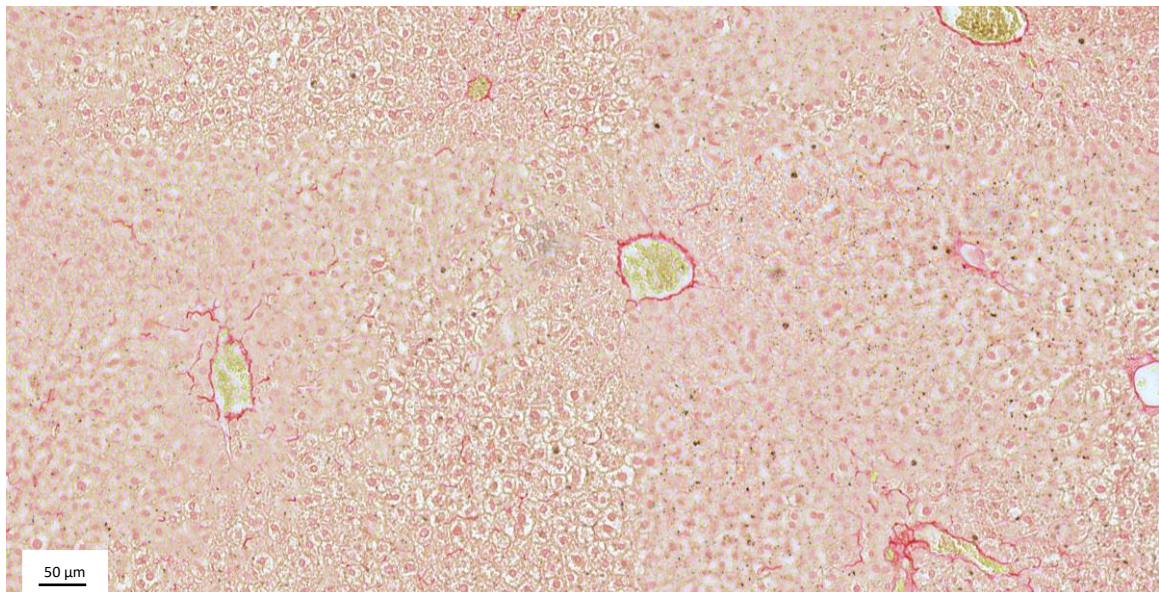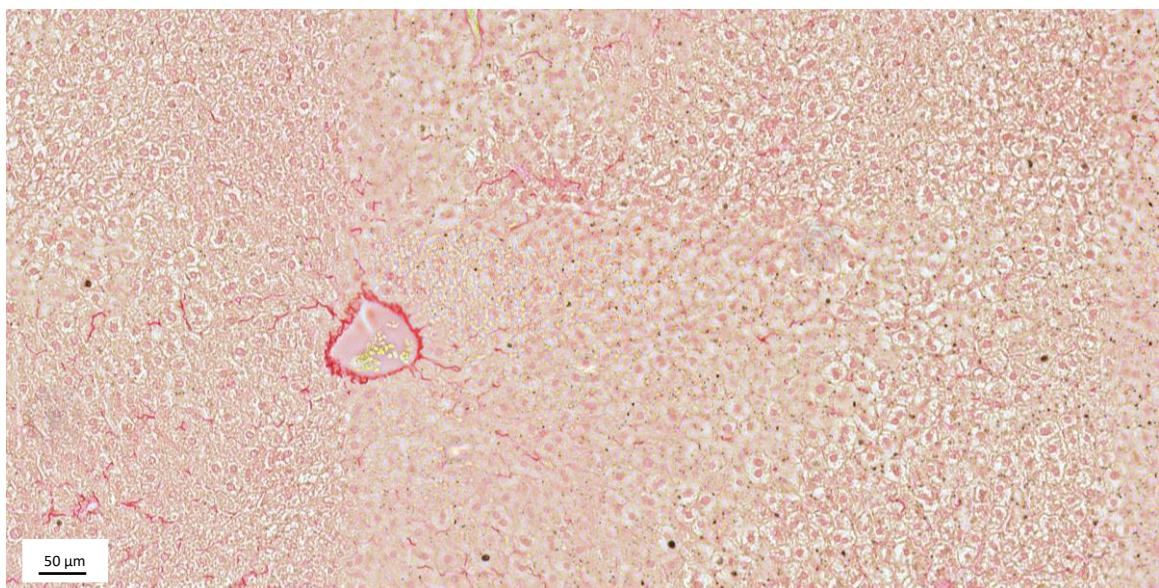



## **Sirius red Staining**

### **HFHCD group**

(15 mice were included)



# HFHCD-1

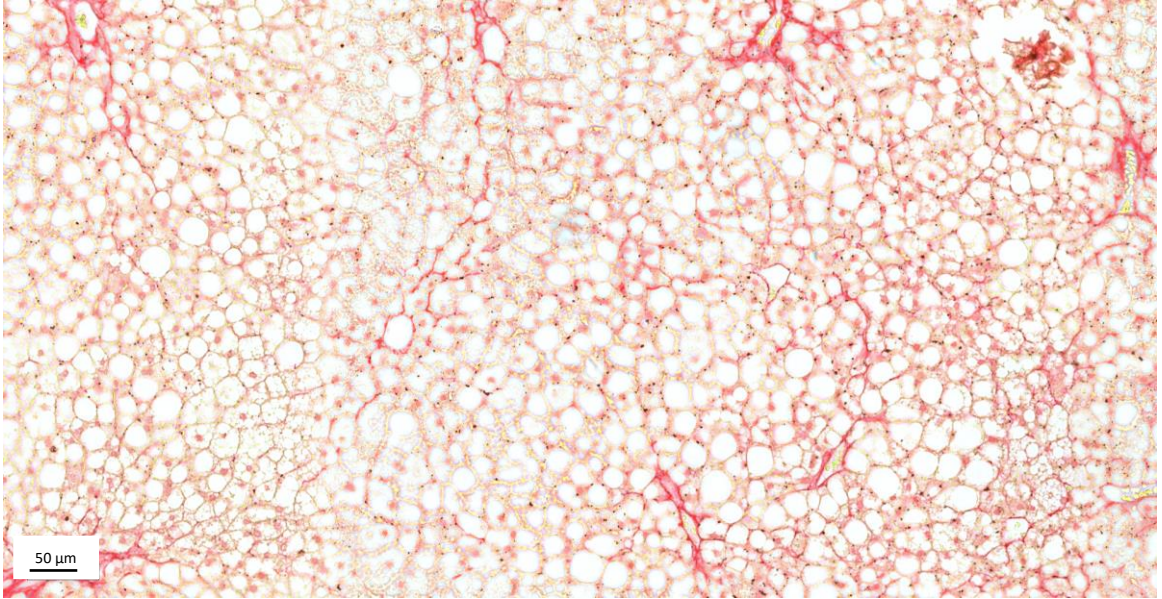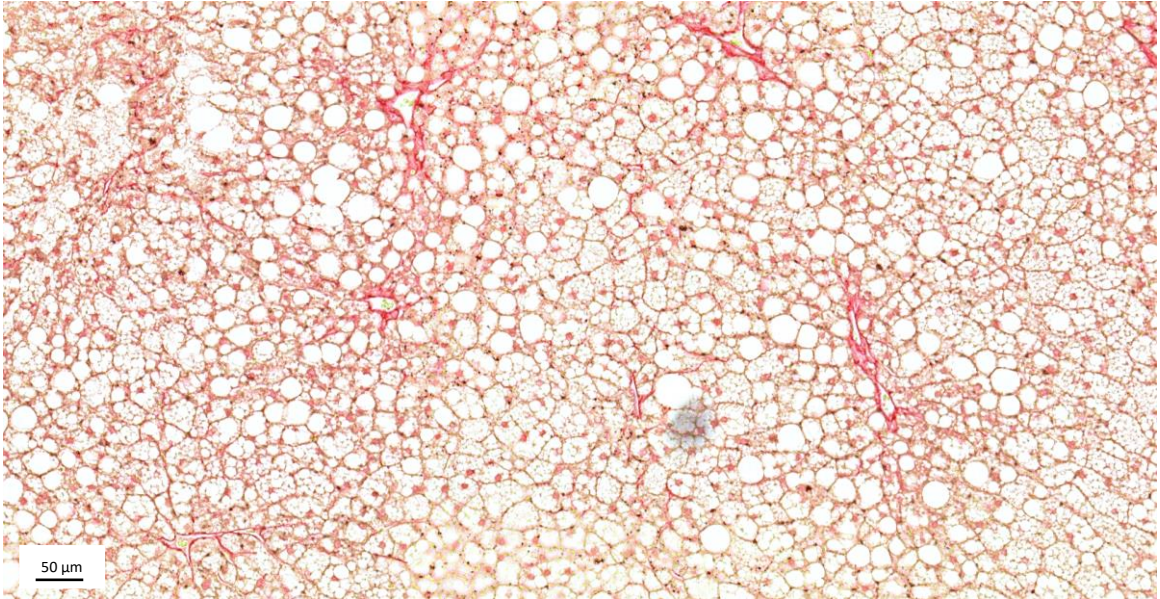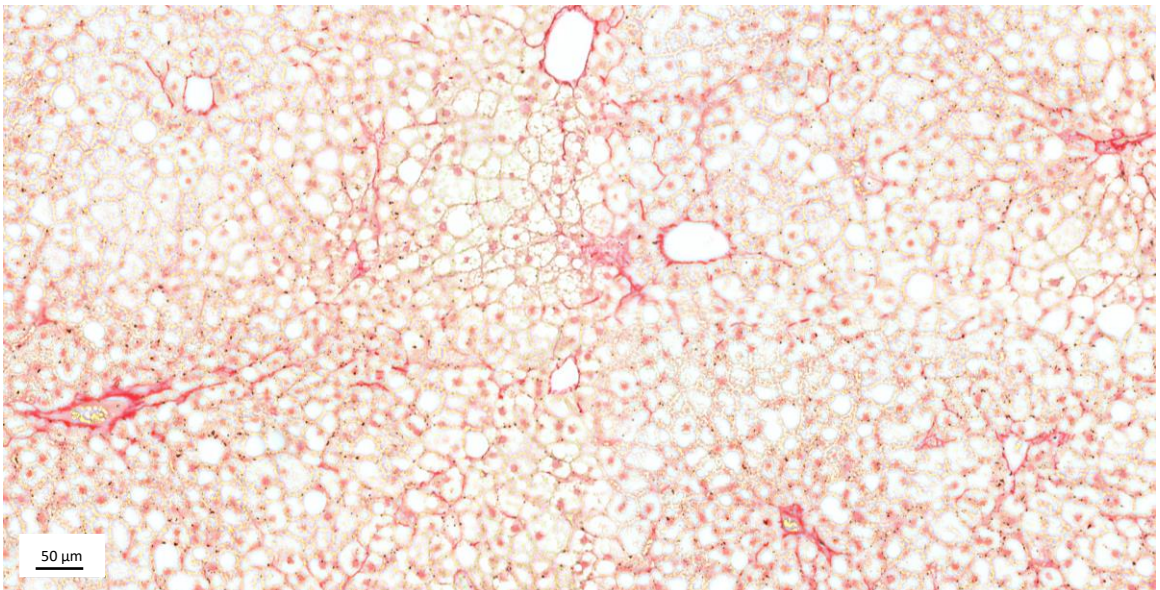



# HFHCD-2

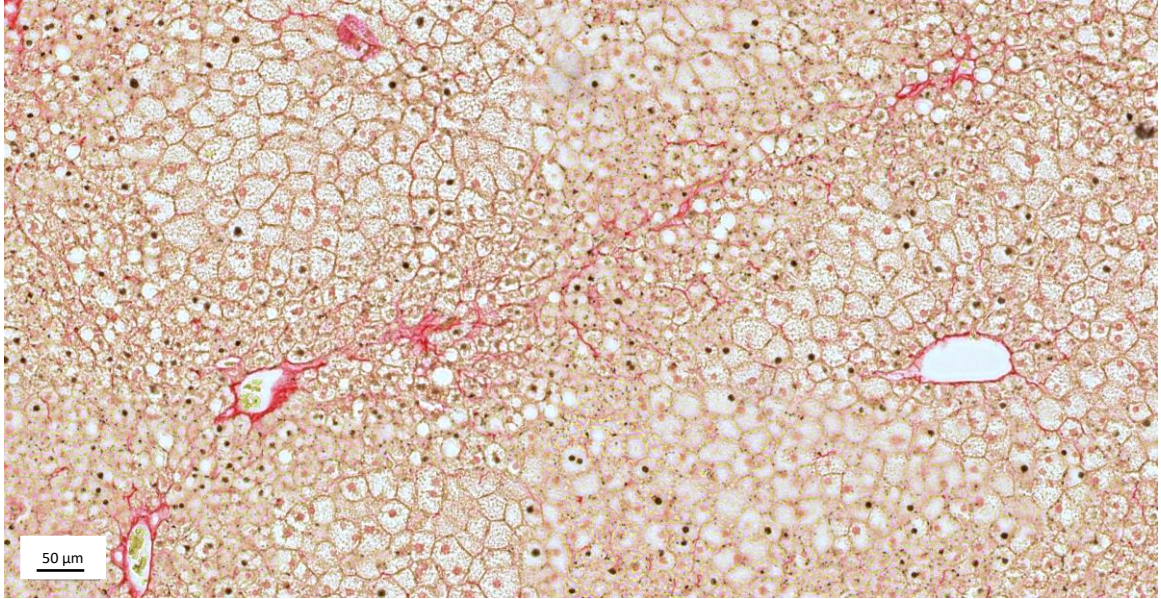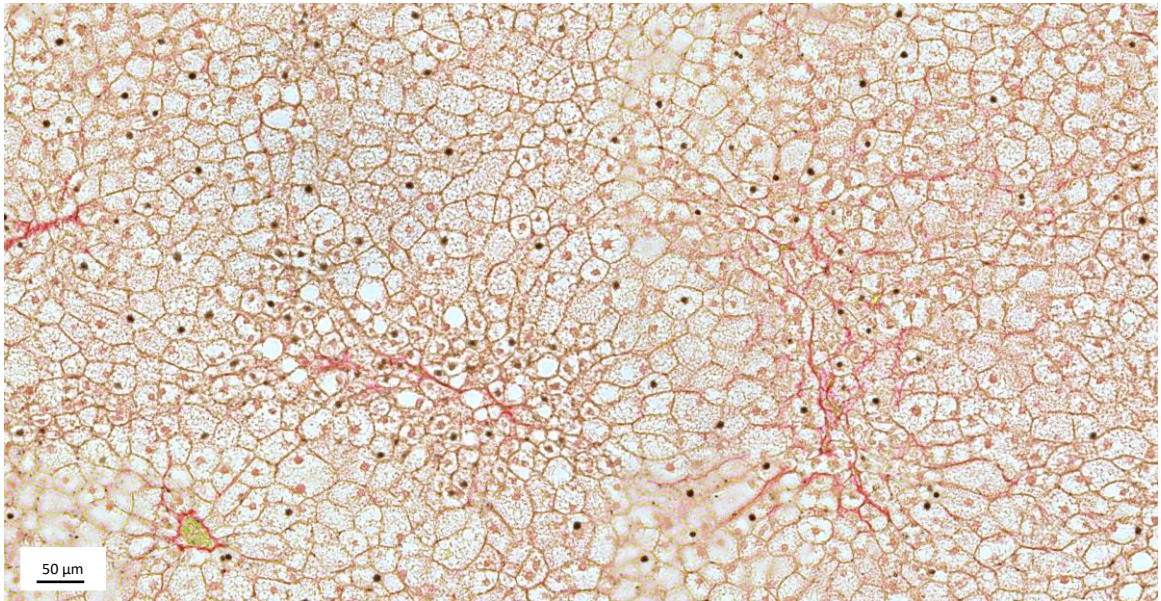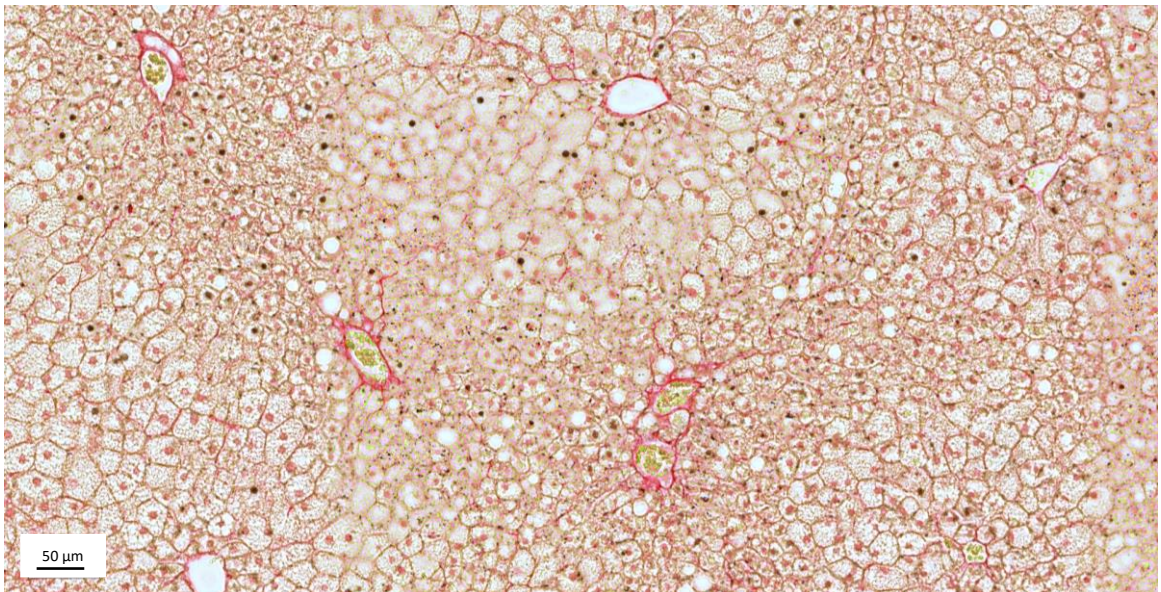



# HFHCD-3

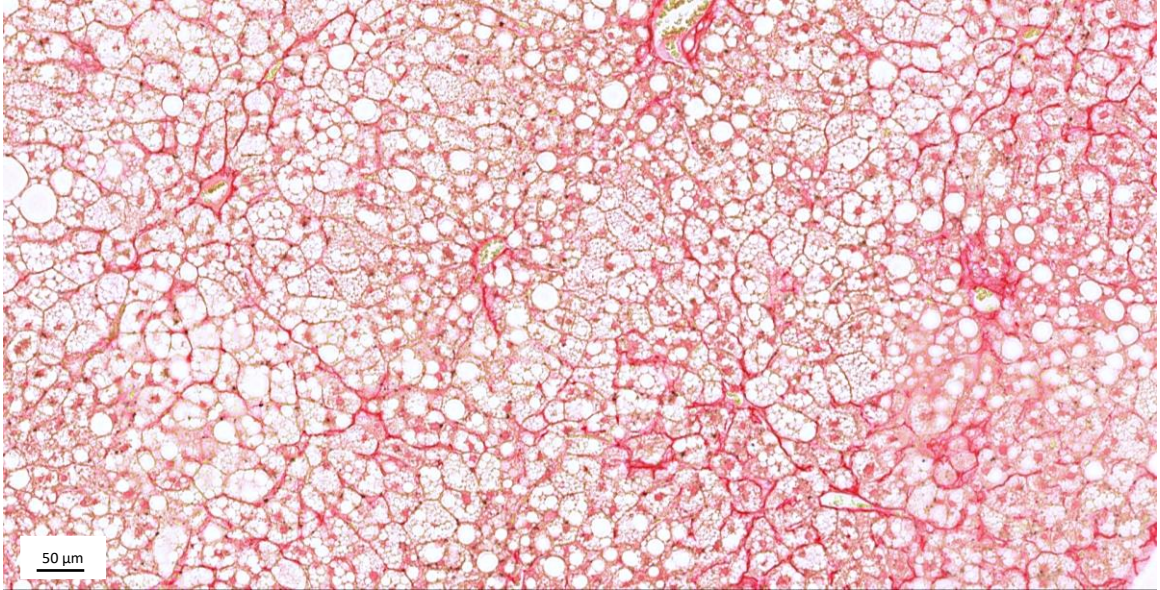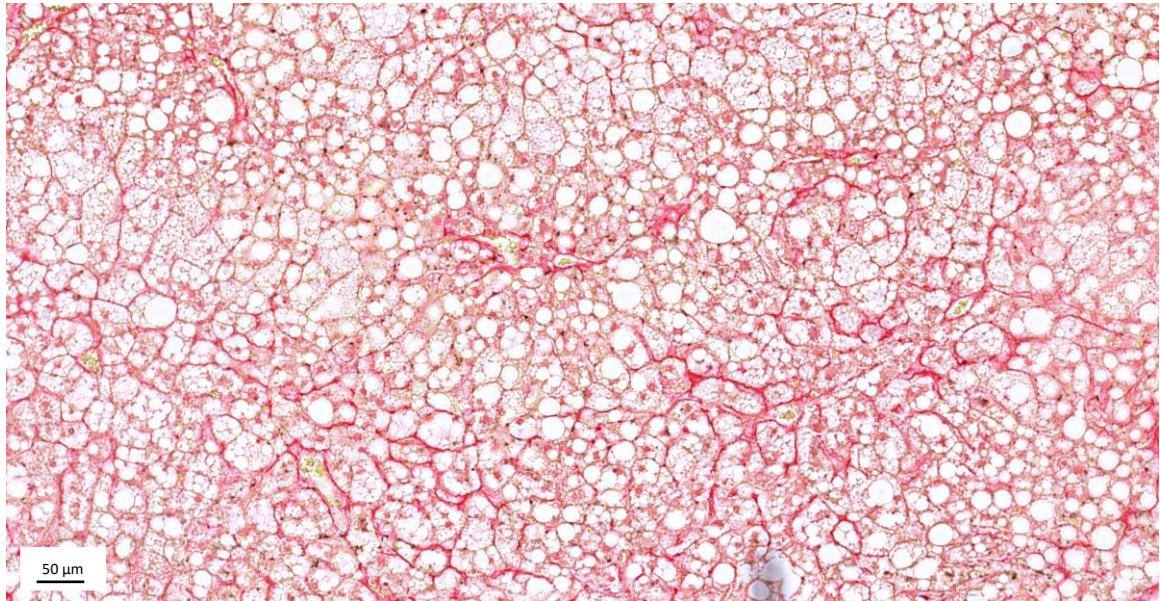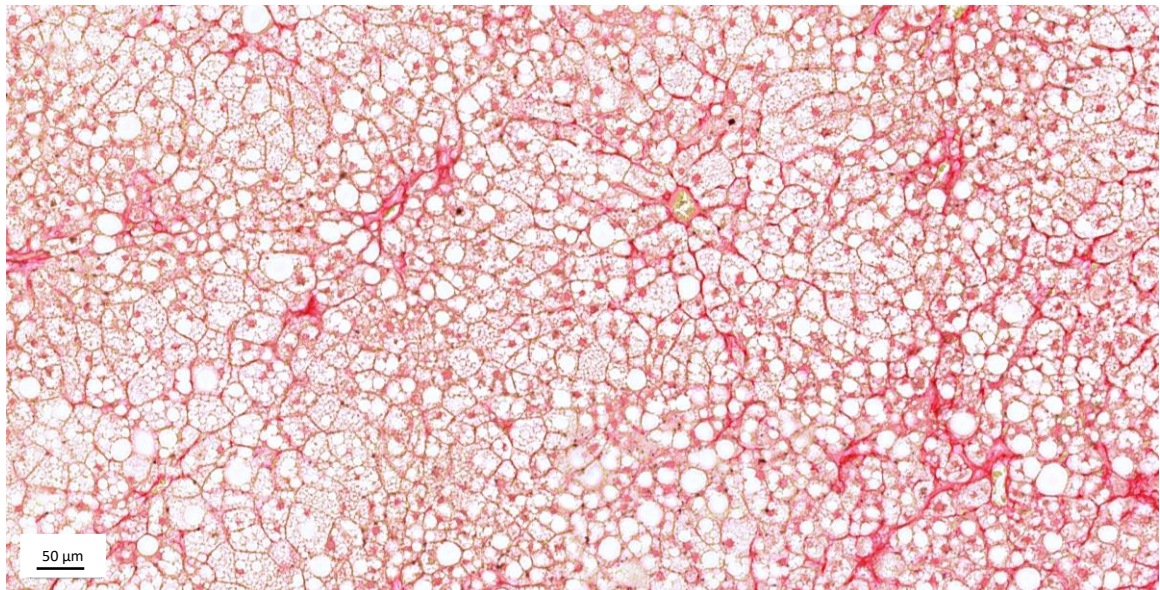



# HFHCD-4

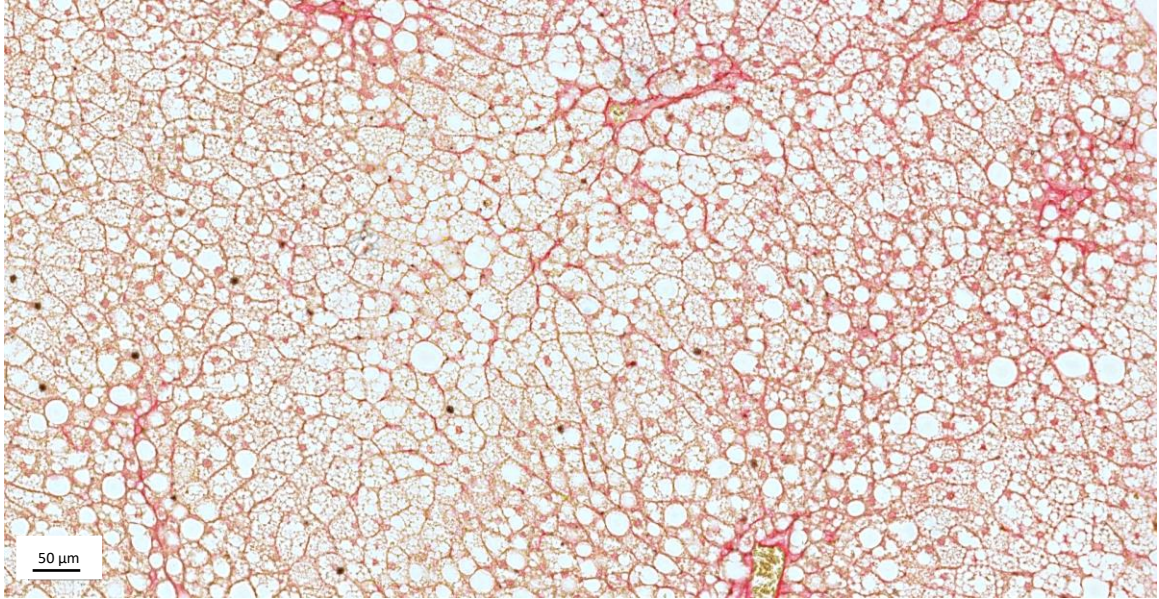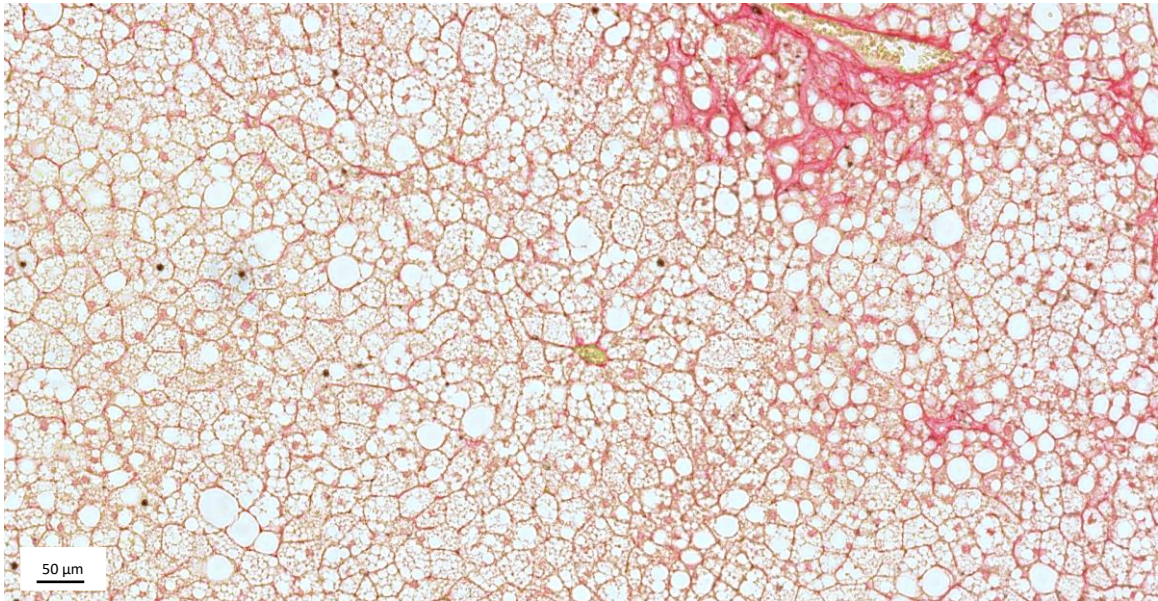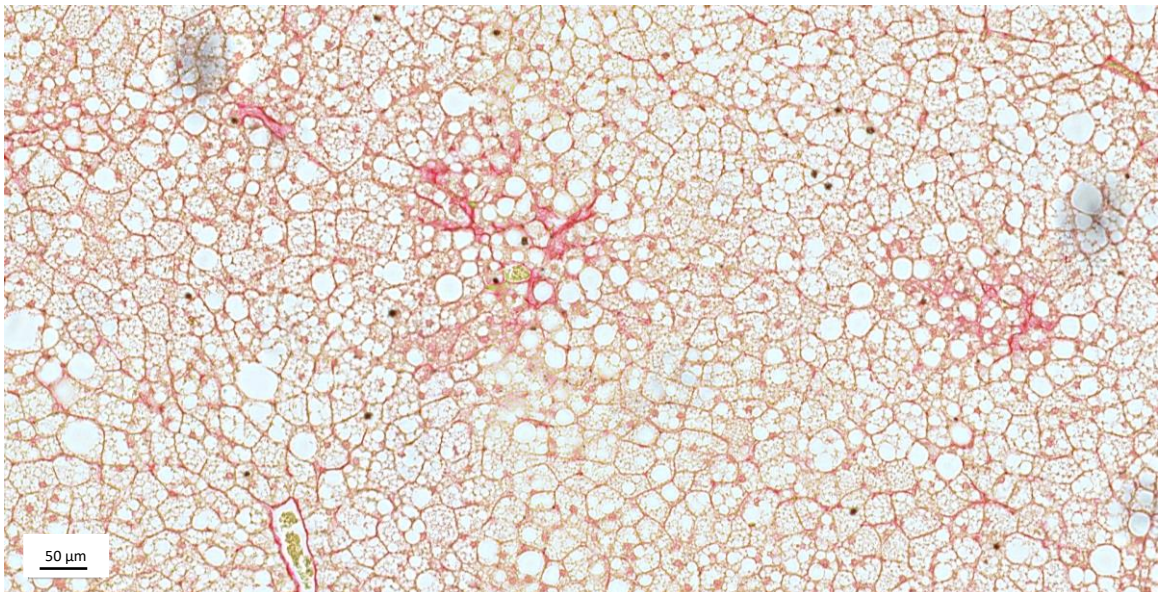



# HFHCD-5

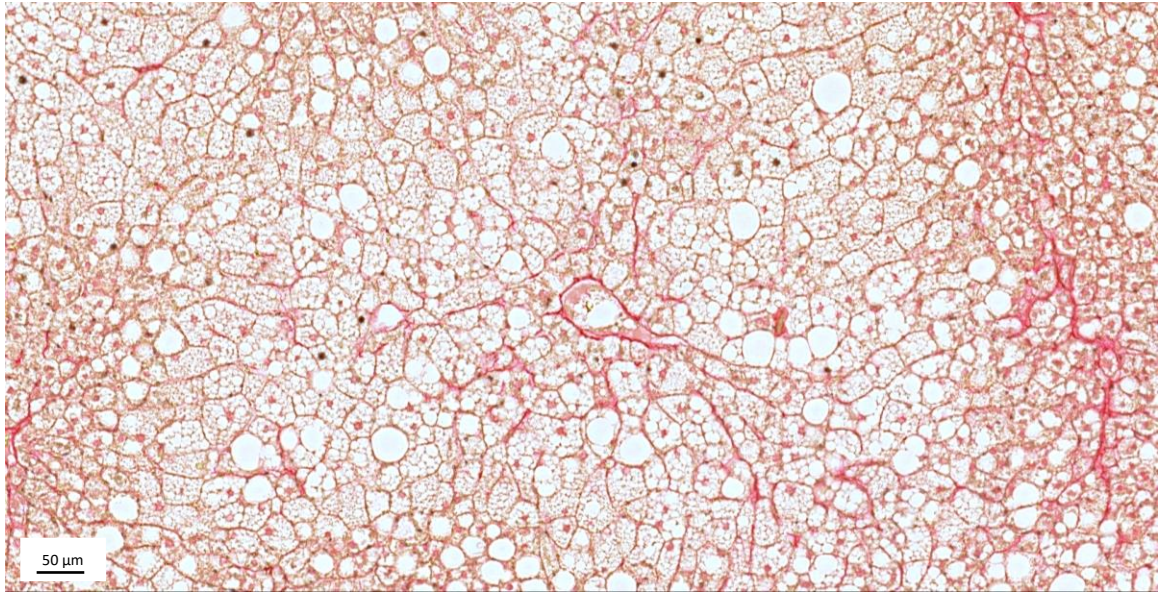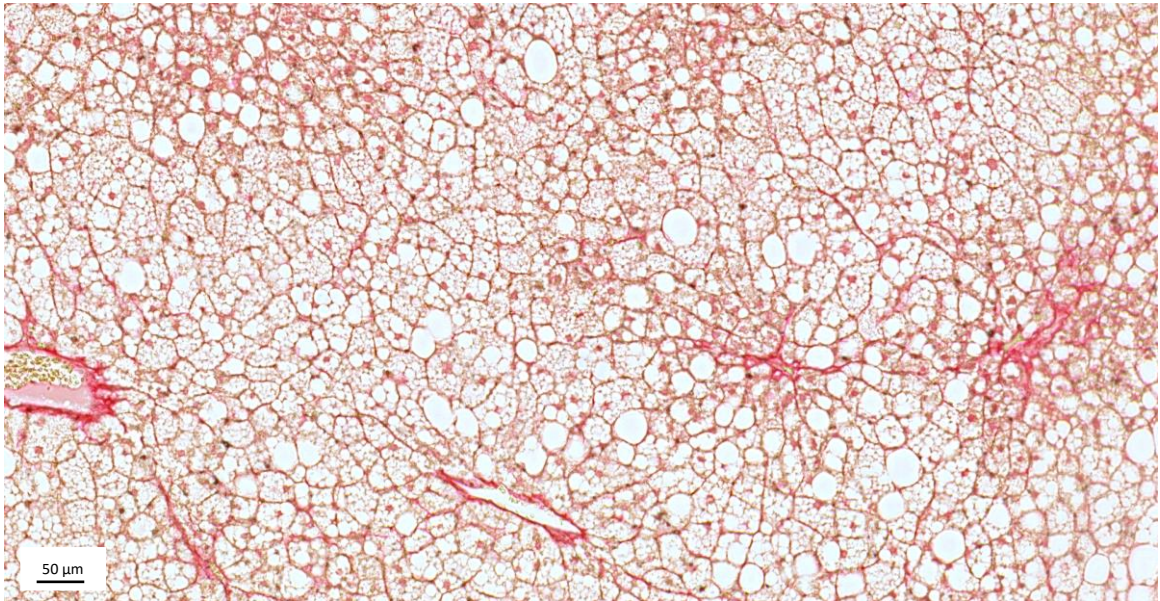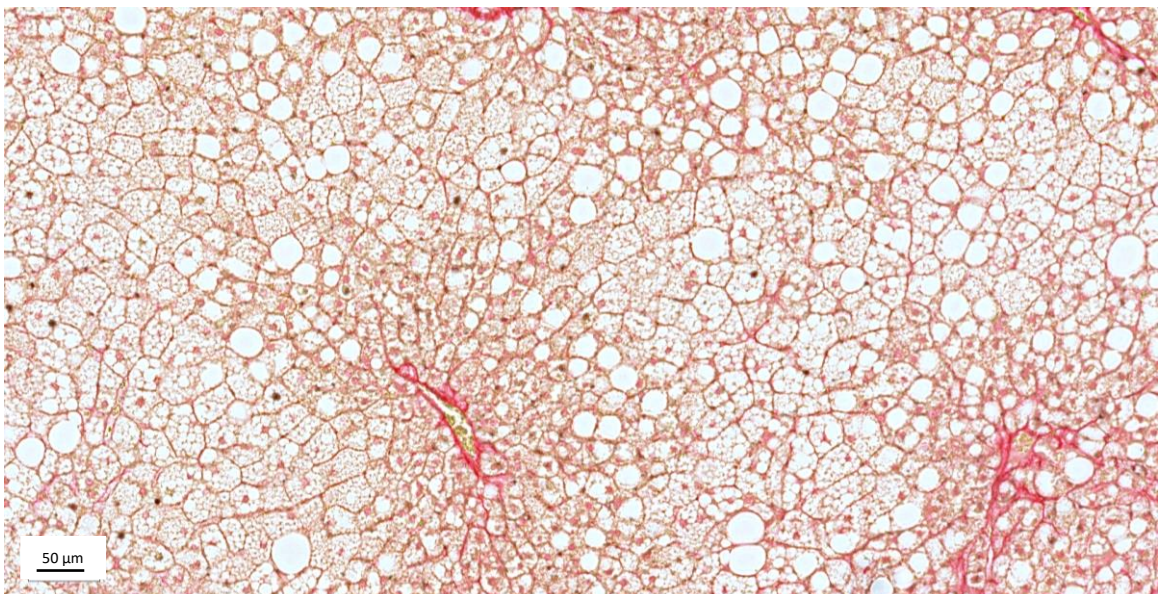



# HFHCD-6

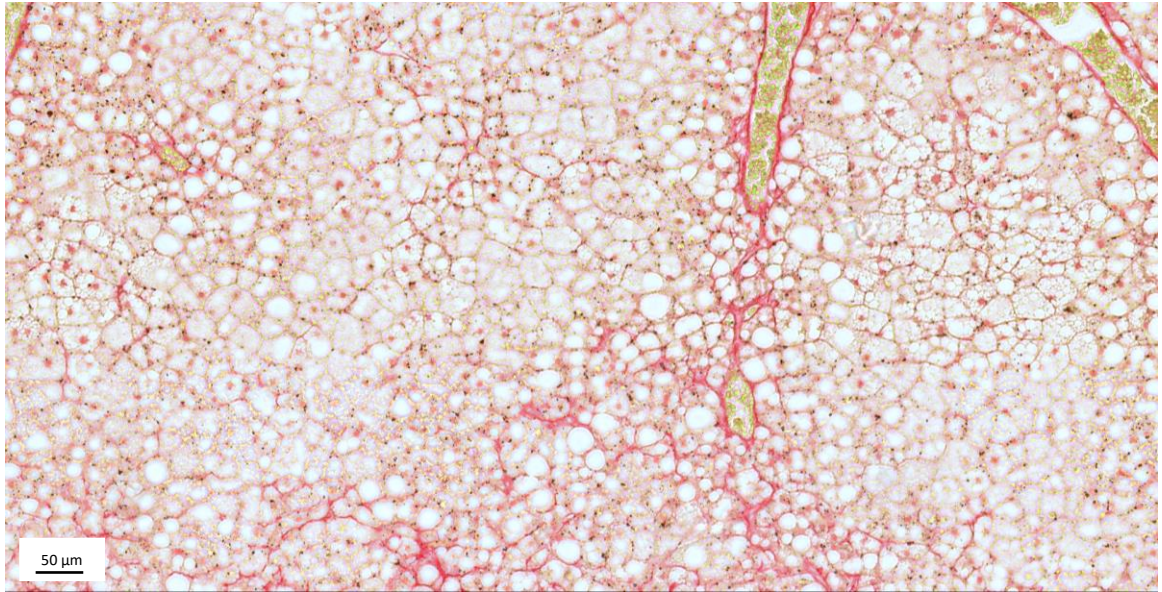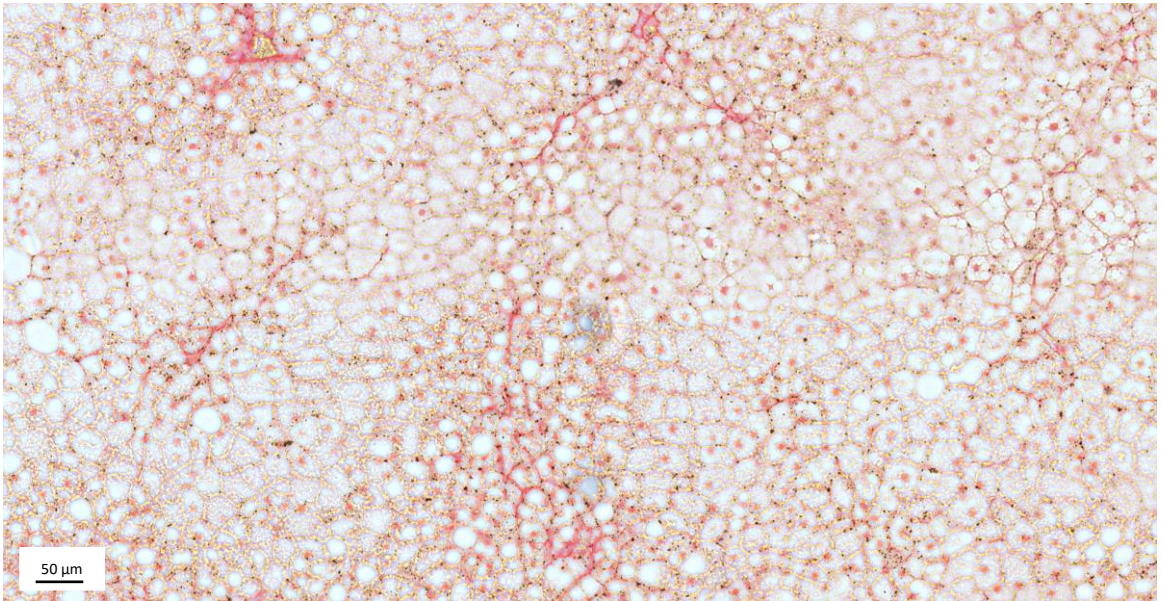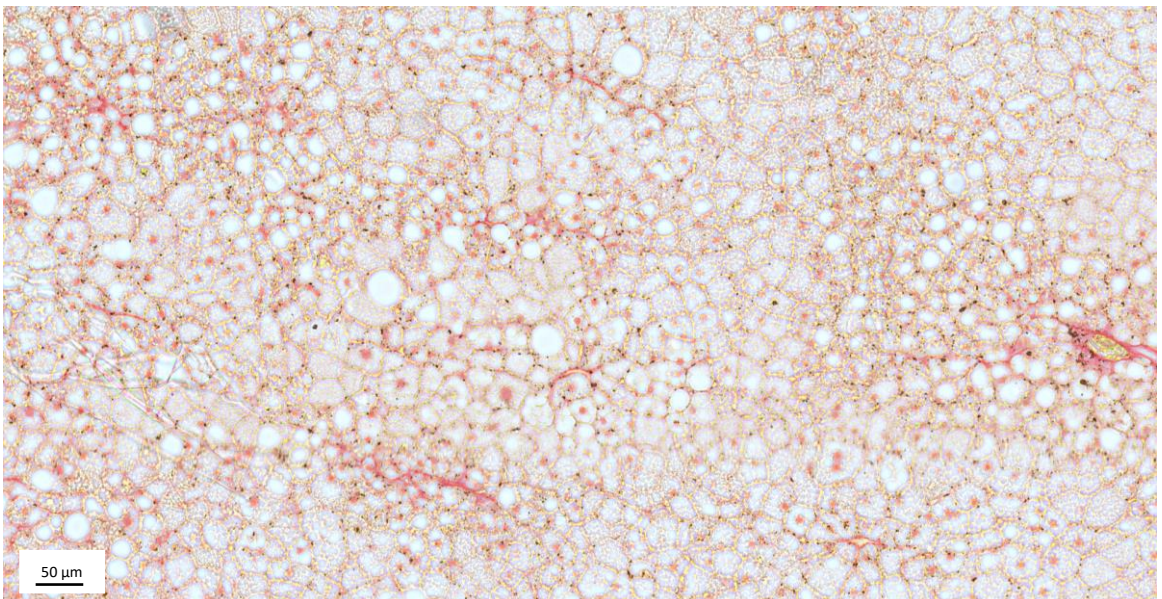



# HFHCD-7

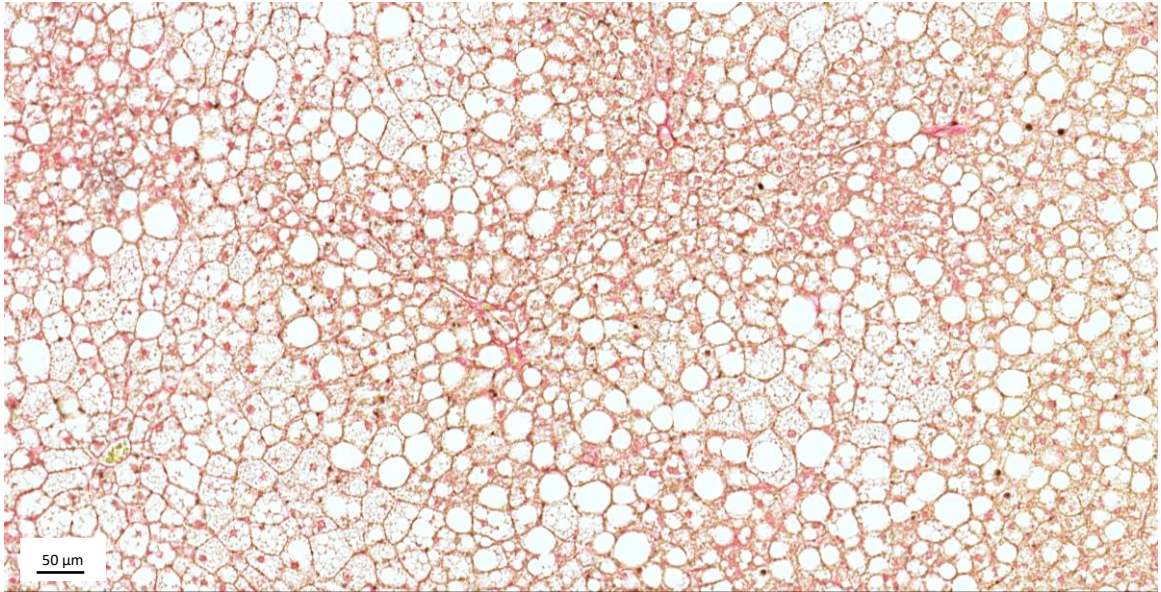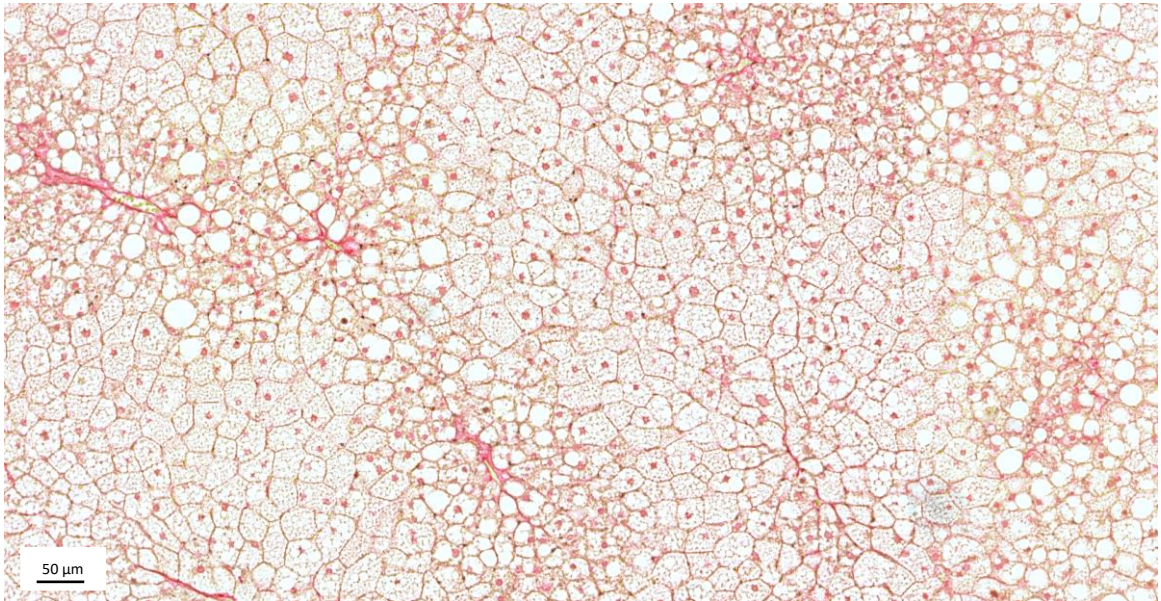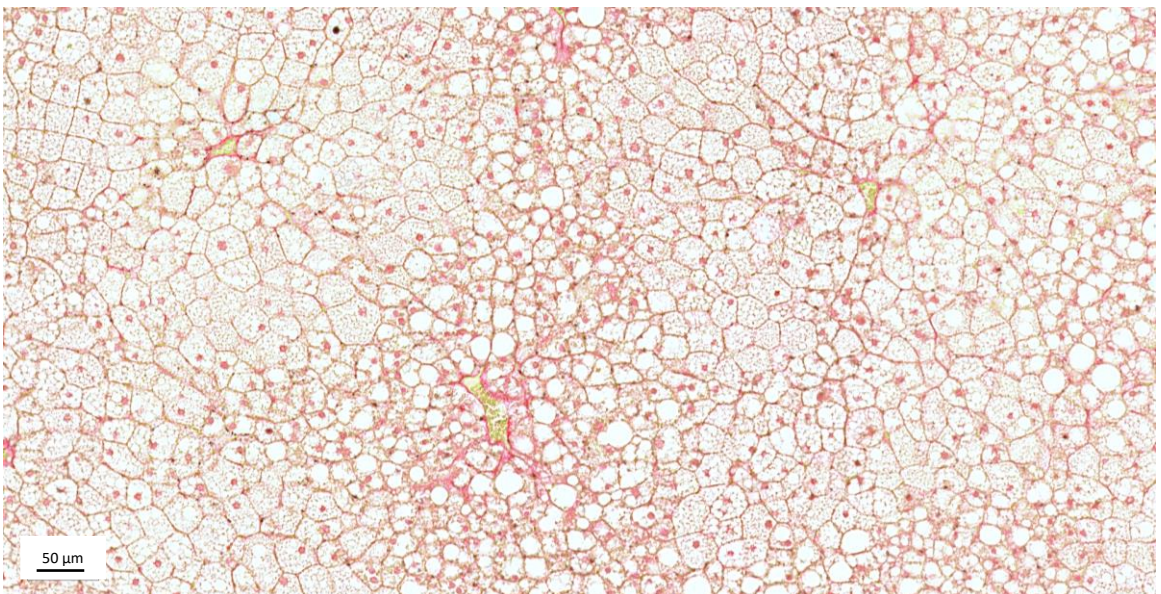



# HFHCD-8

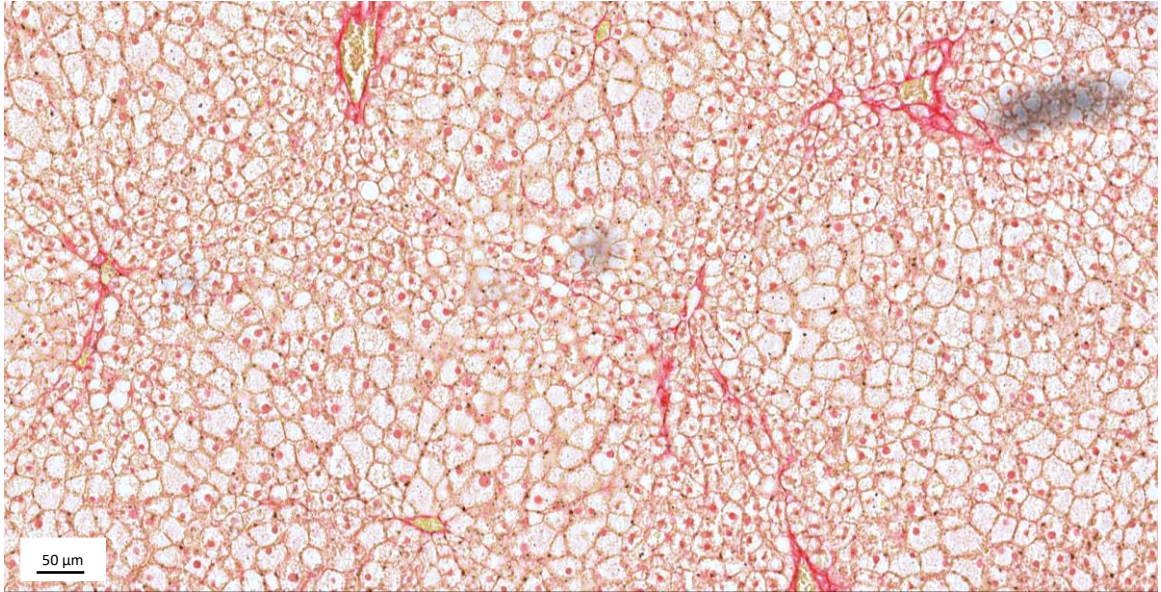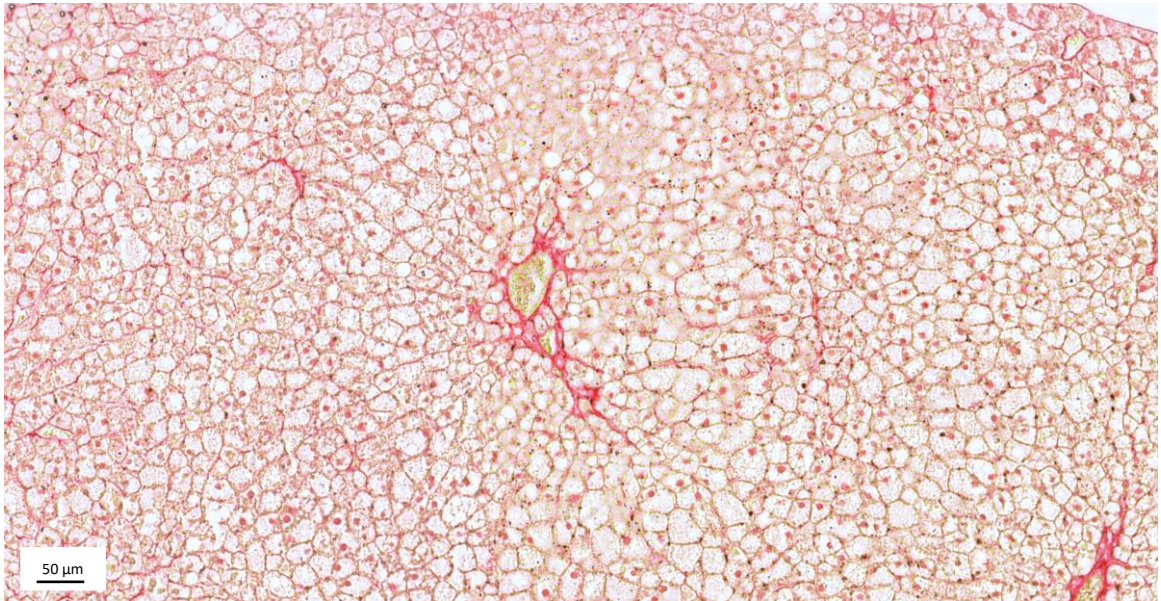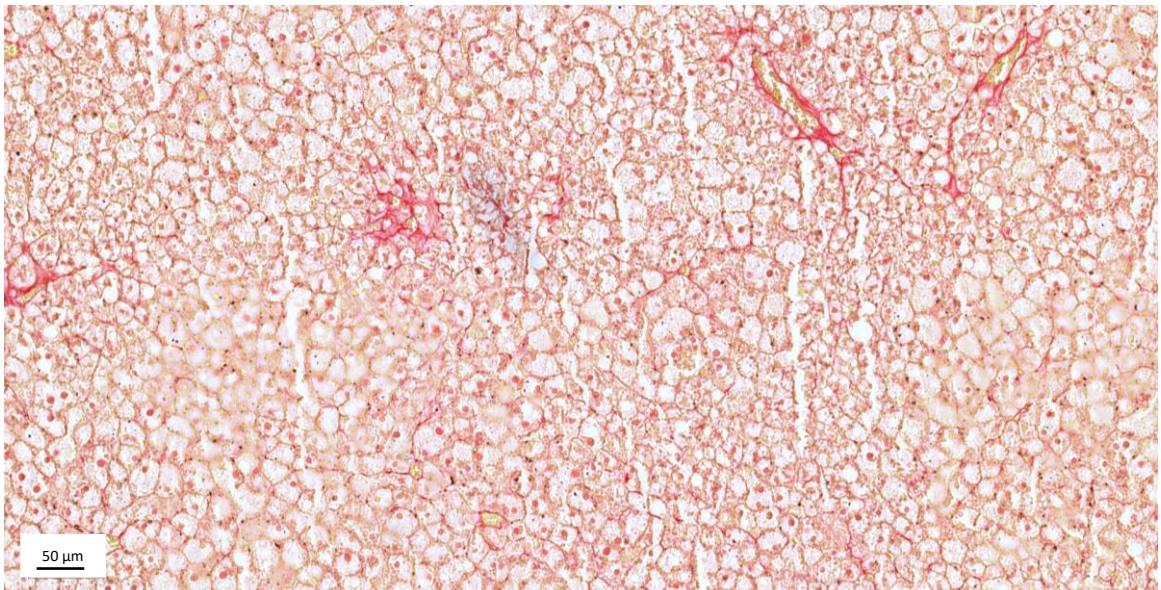



# HFHCD-9

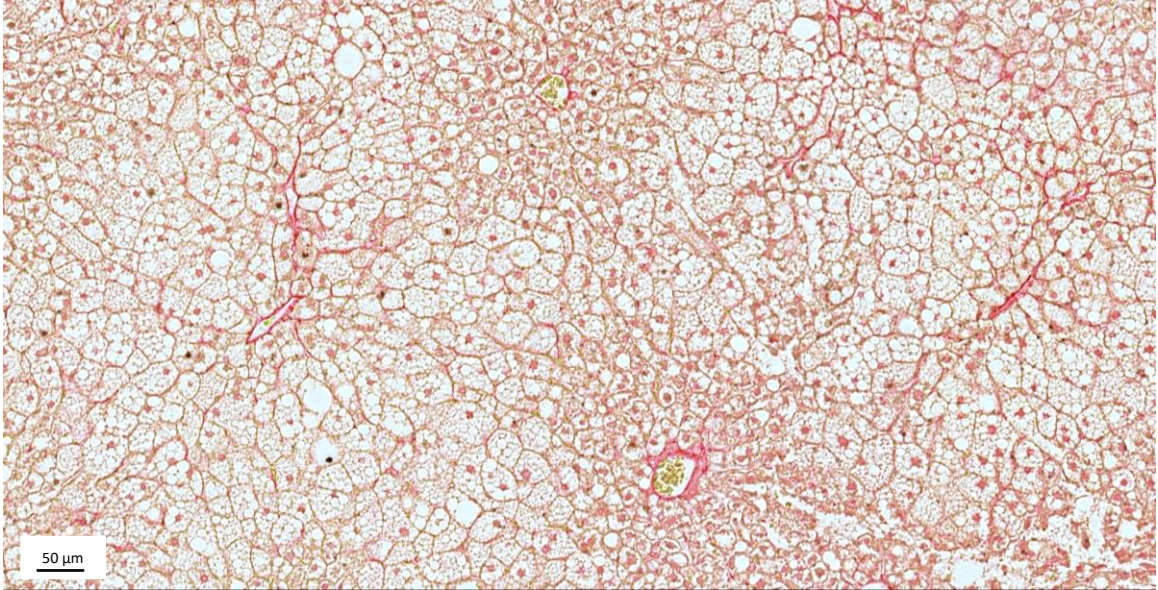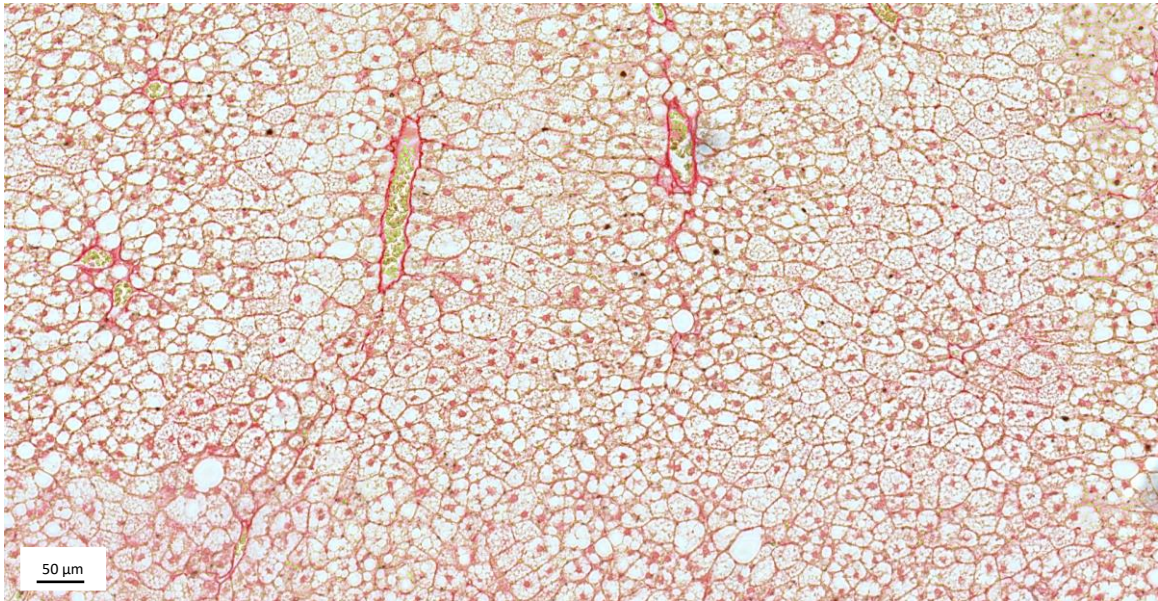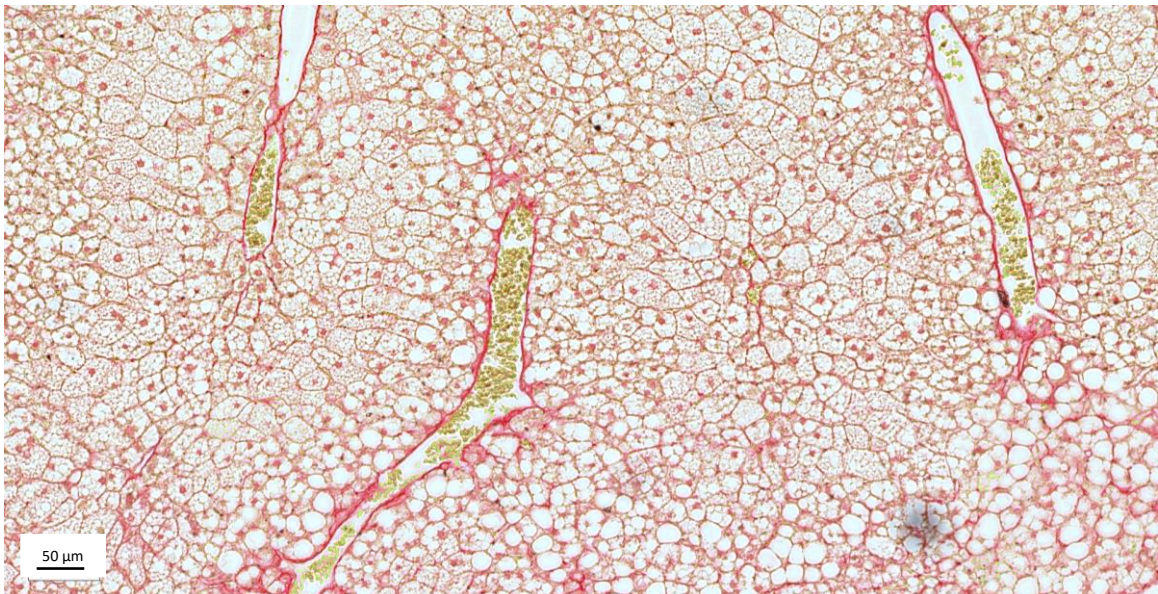



# HFHCD-10

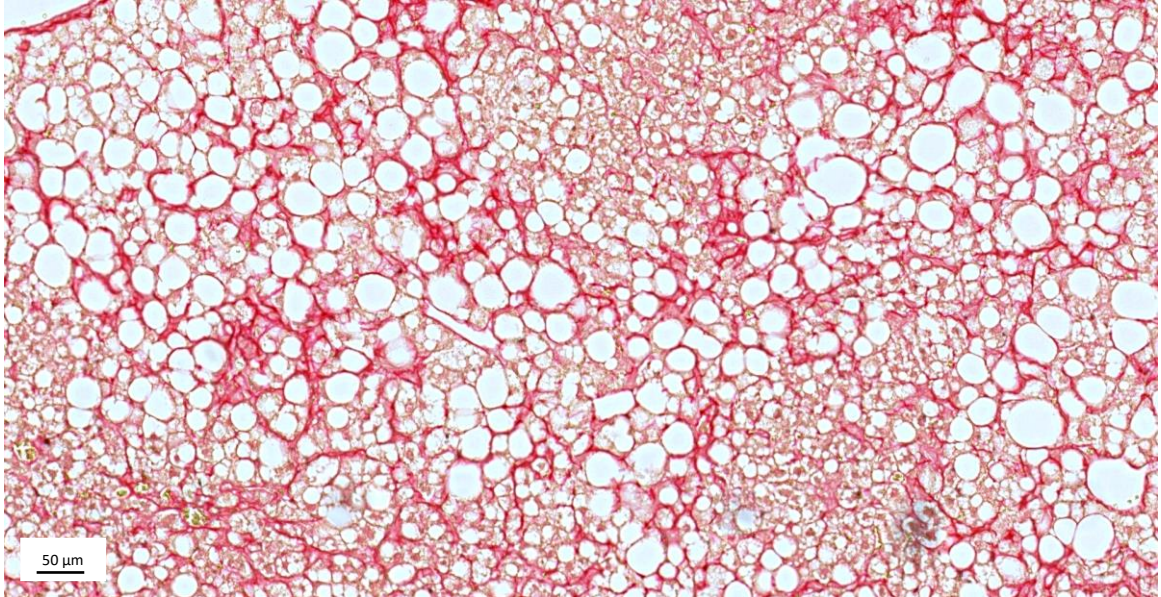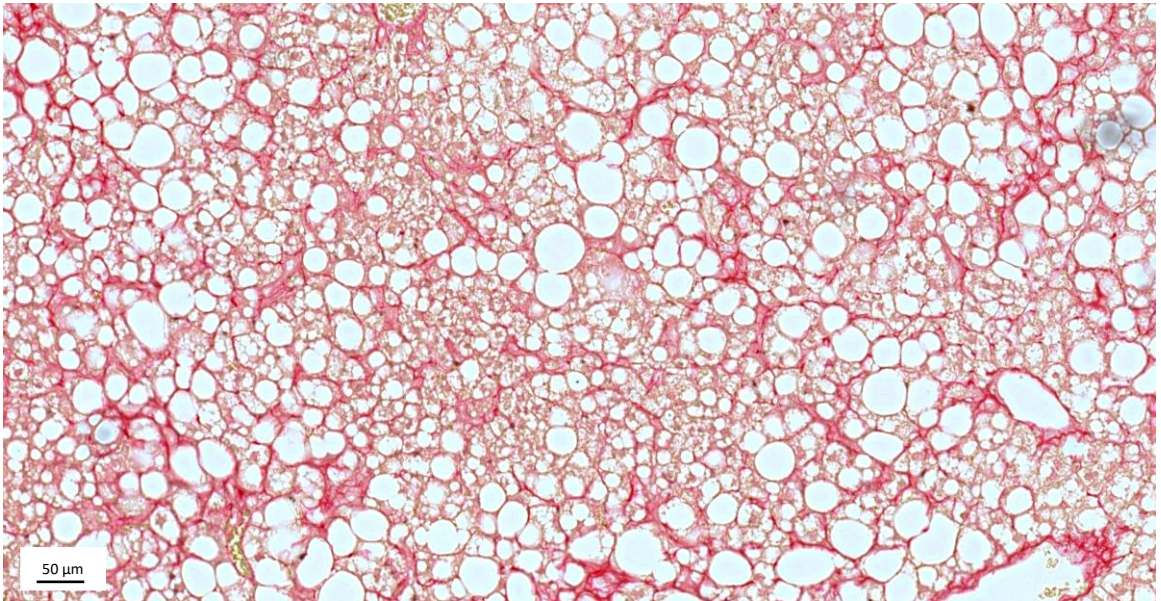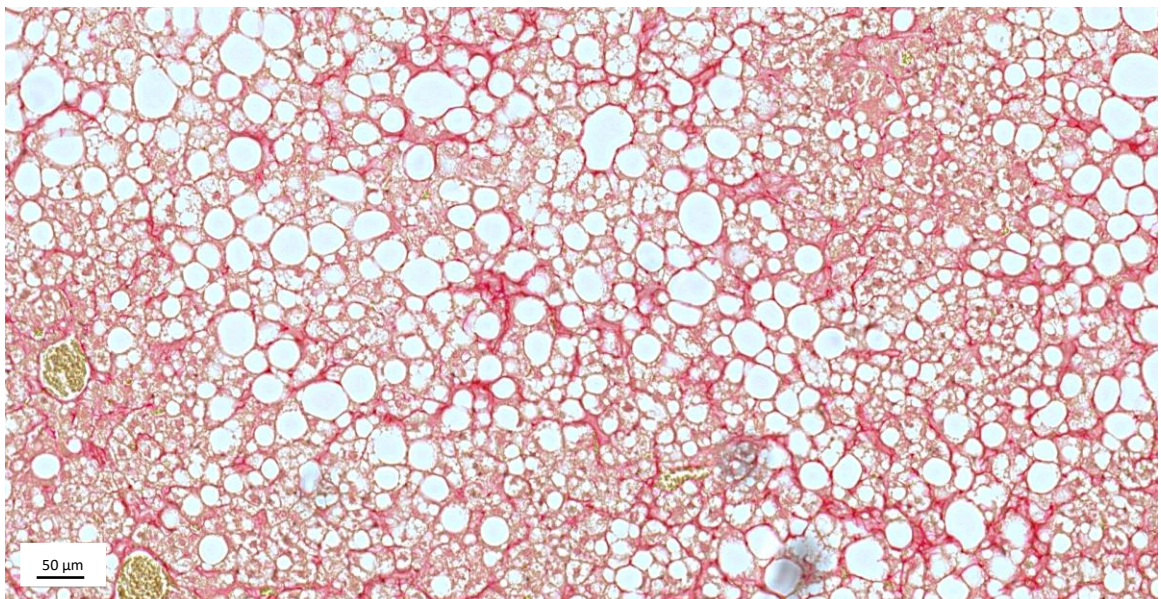



# HFHCD-11

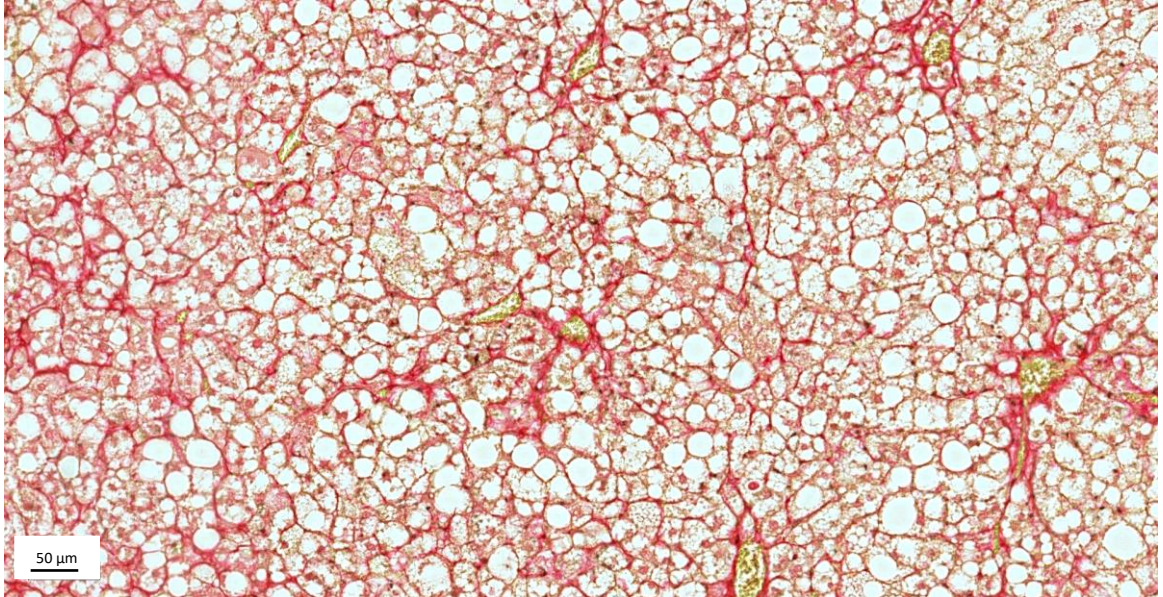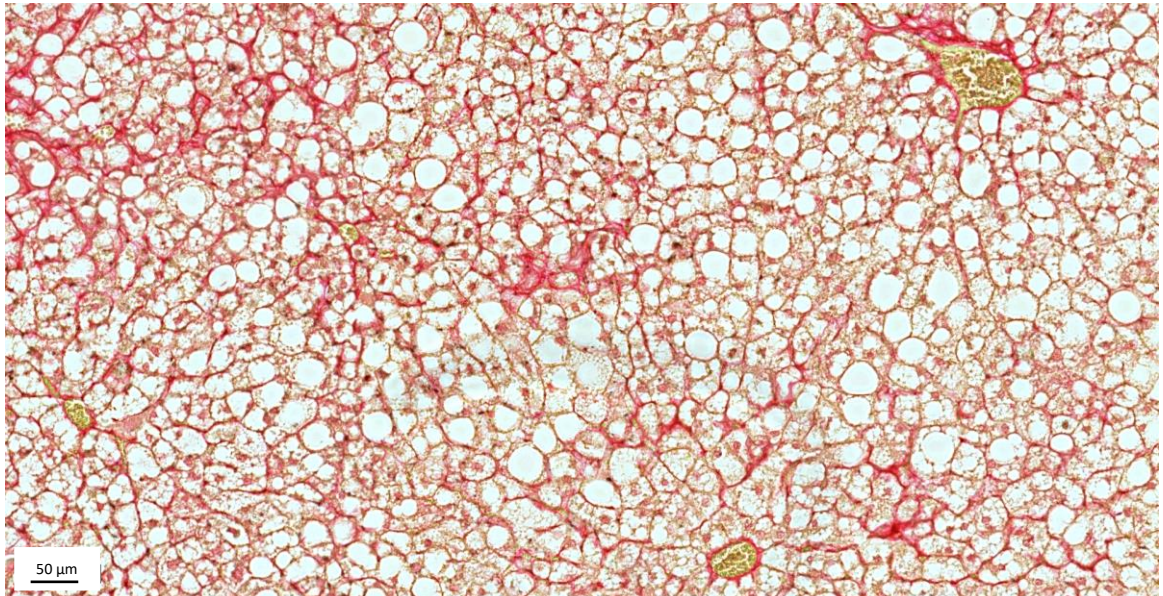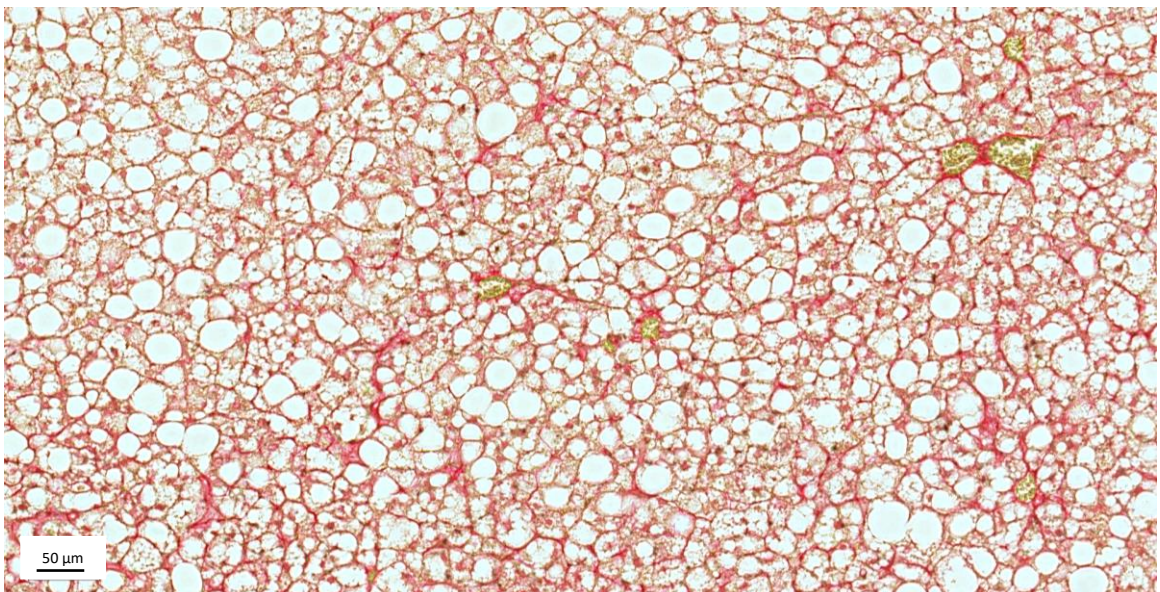



# HFHCD-12

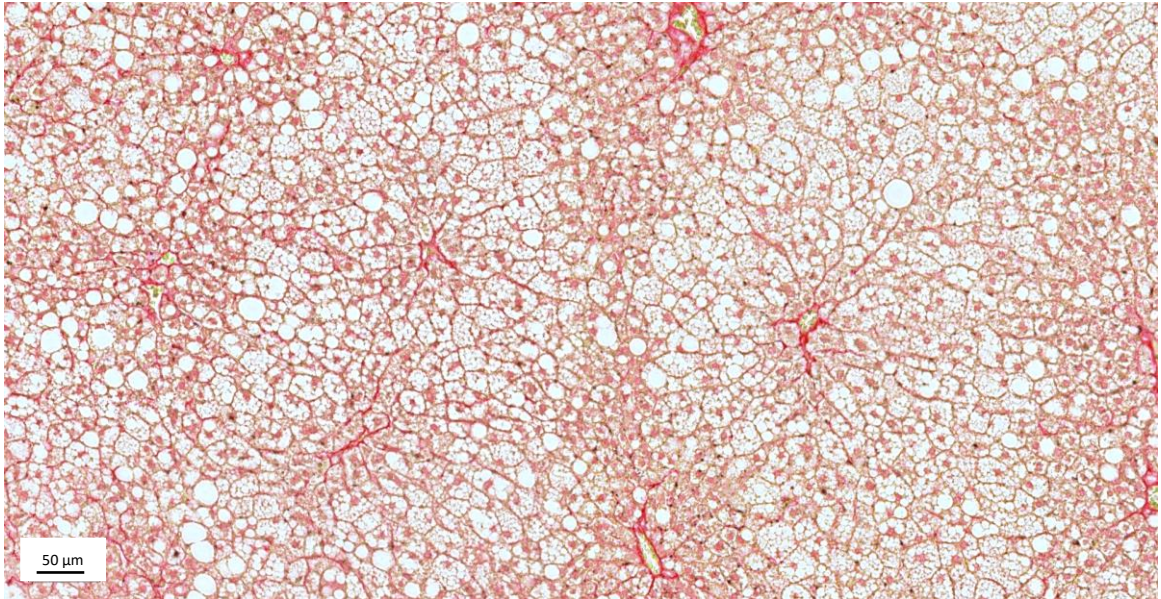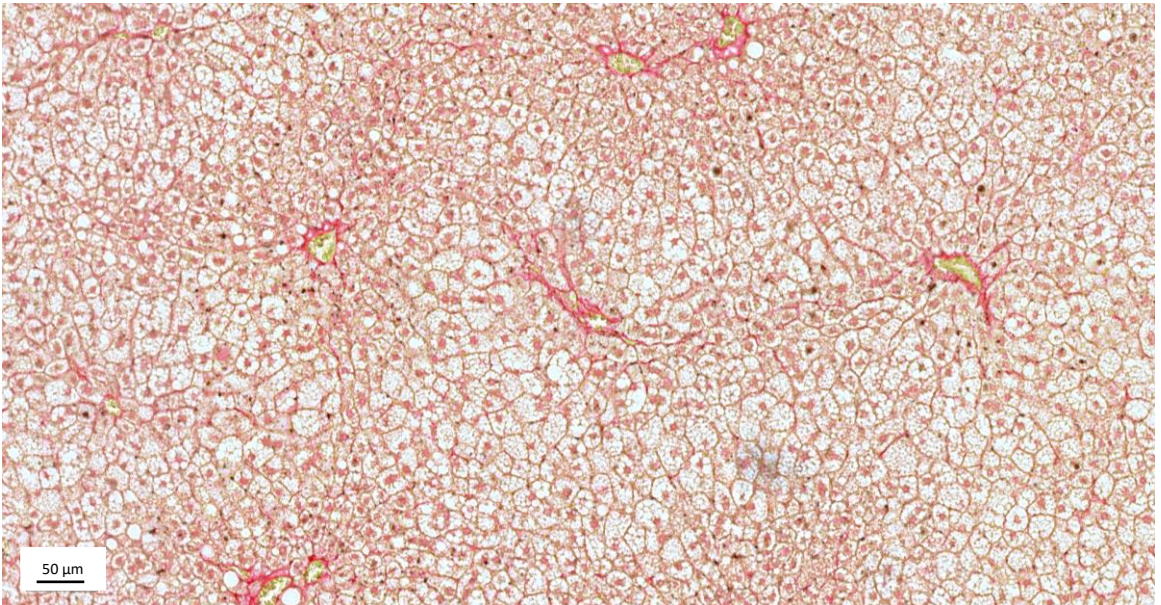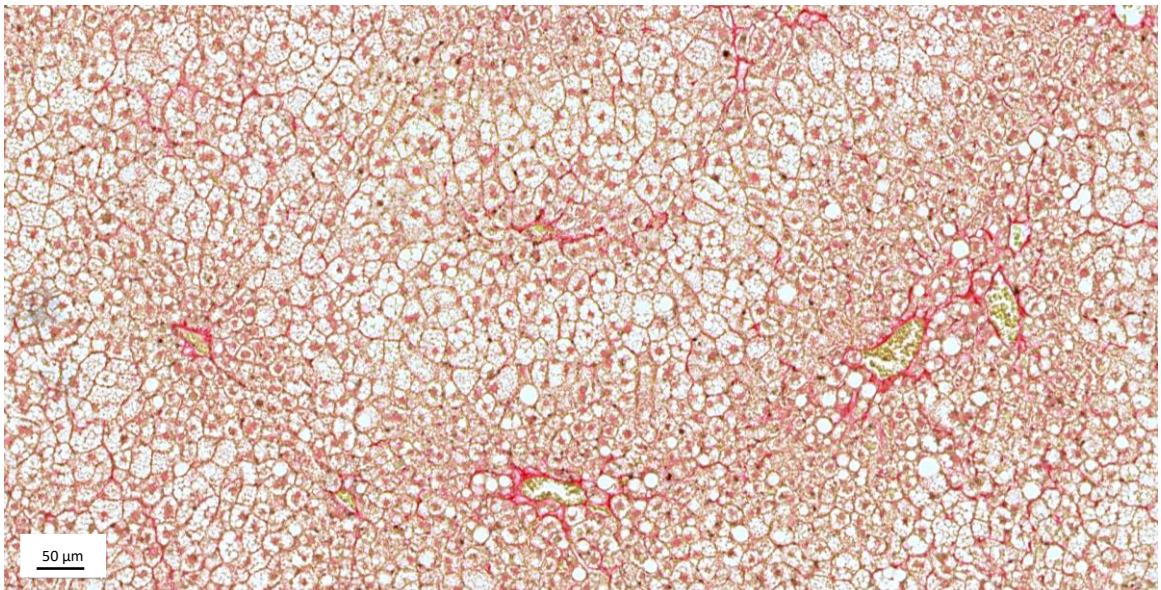



HFHCD-13

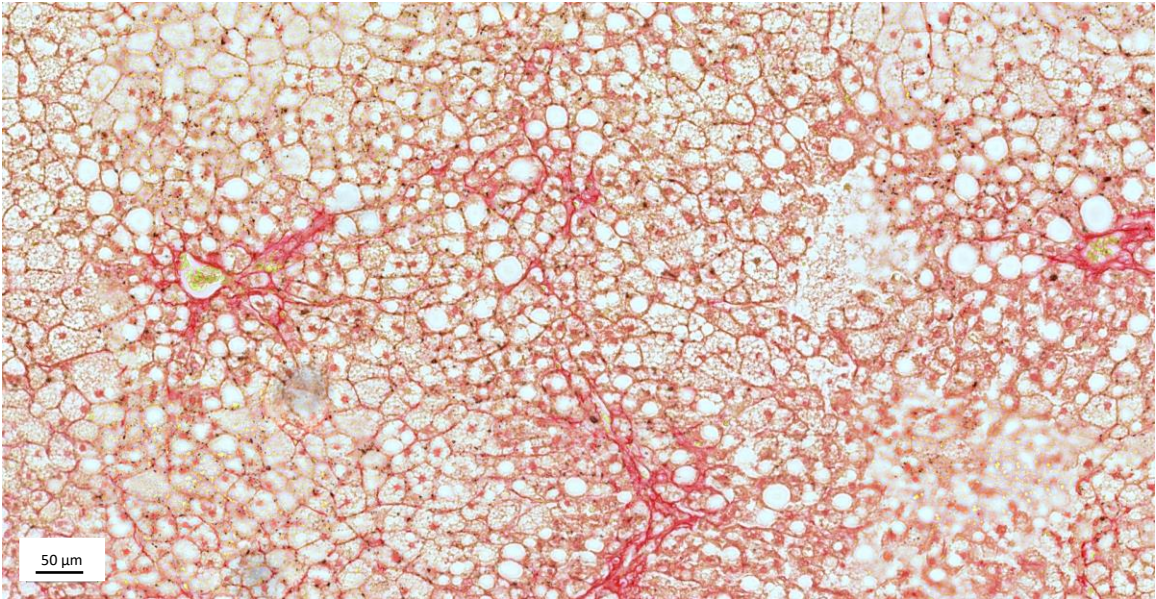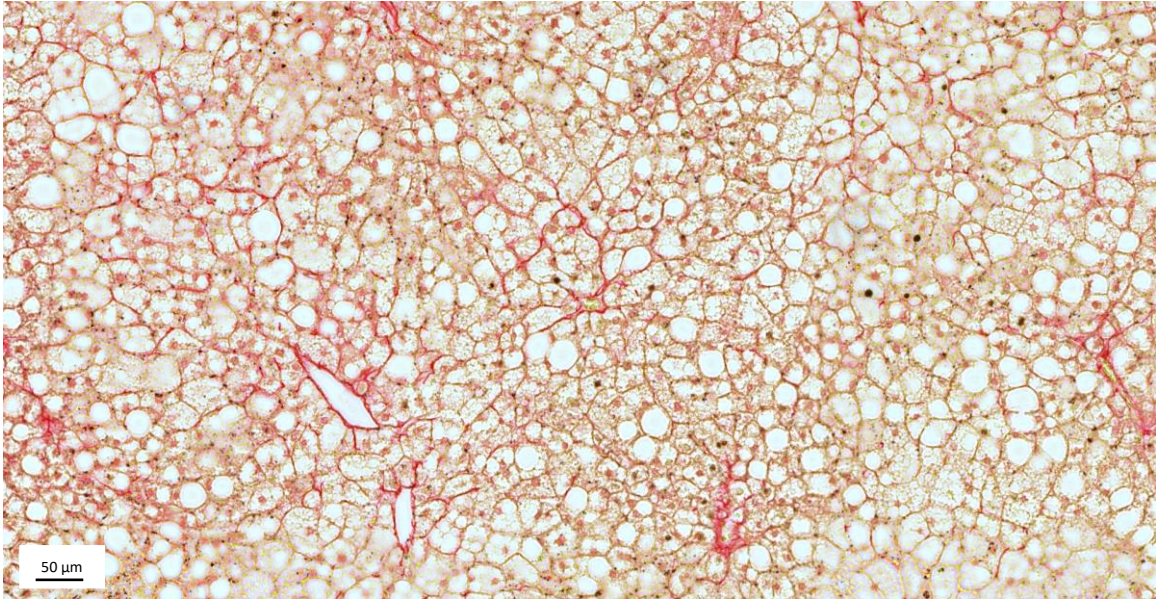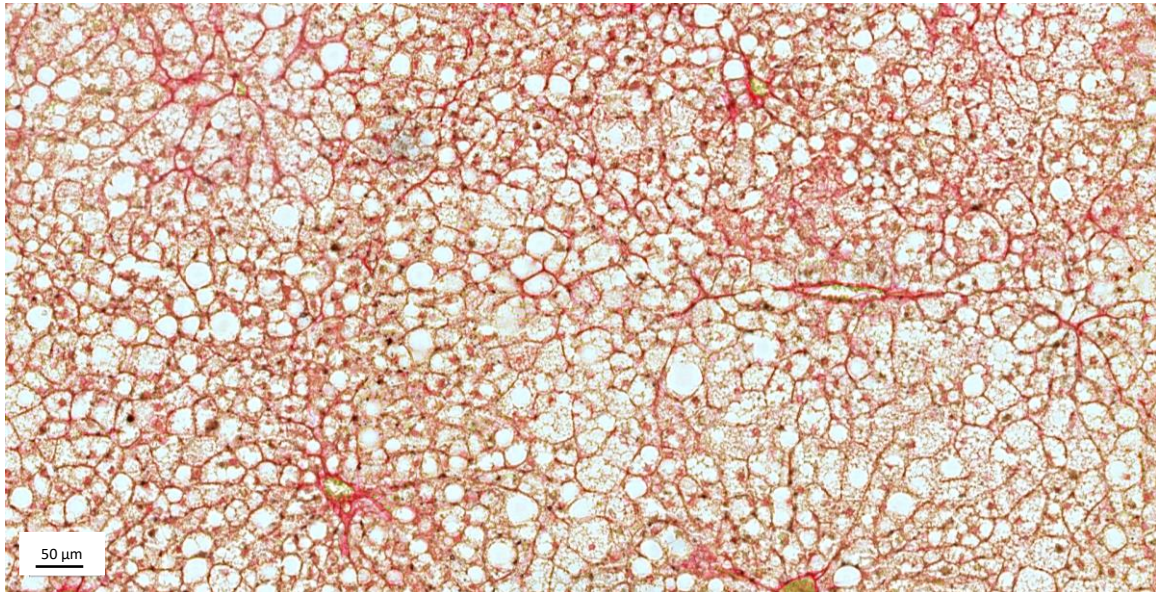



HFHCD-14

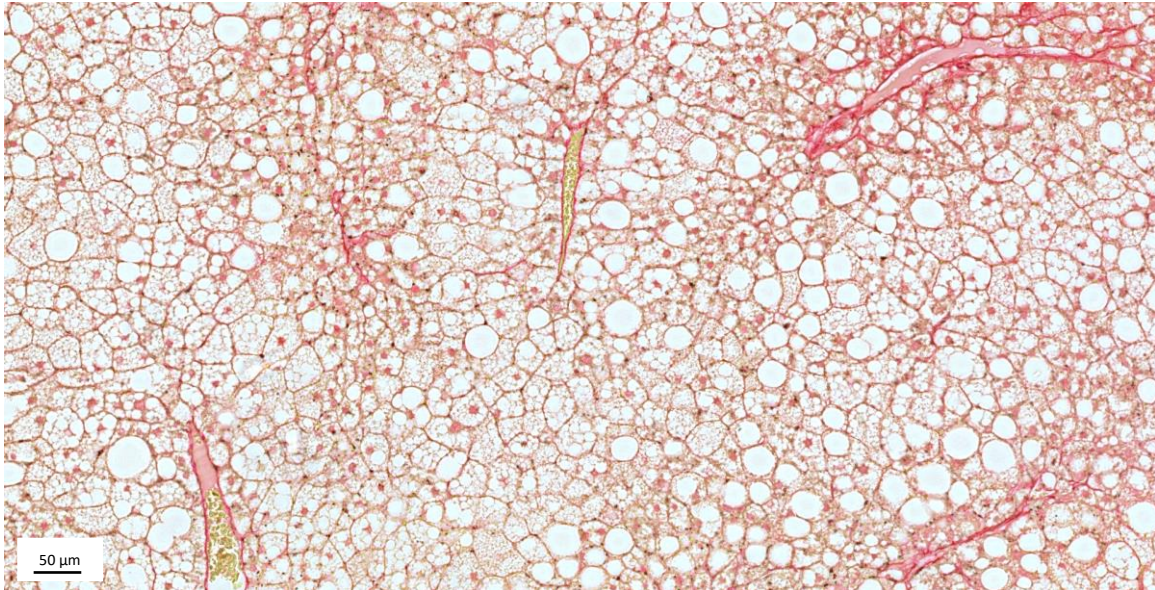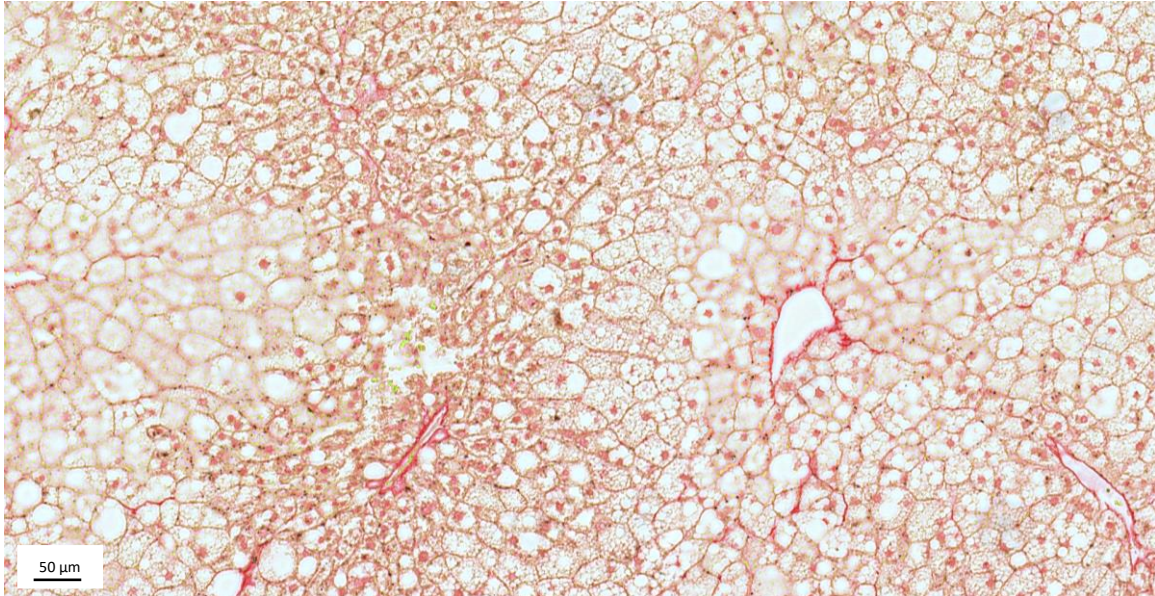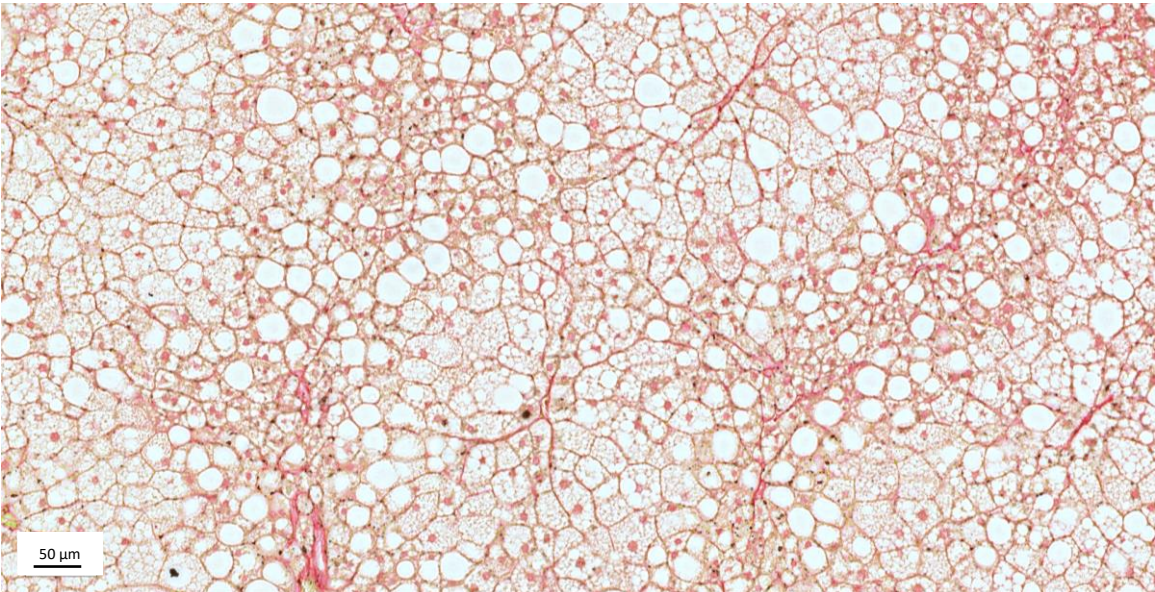



# HFHCD-15

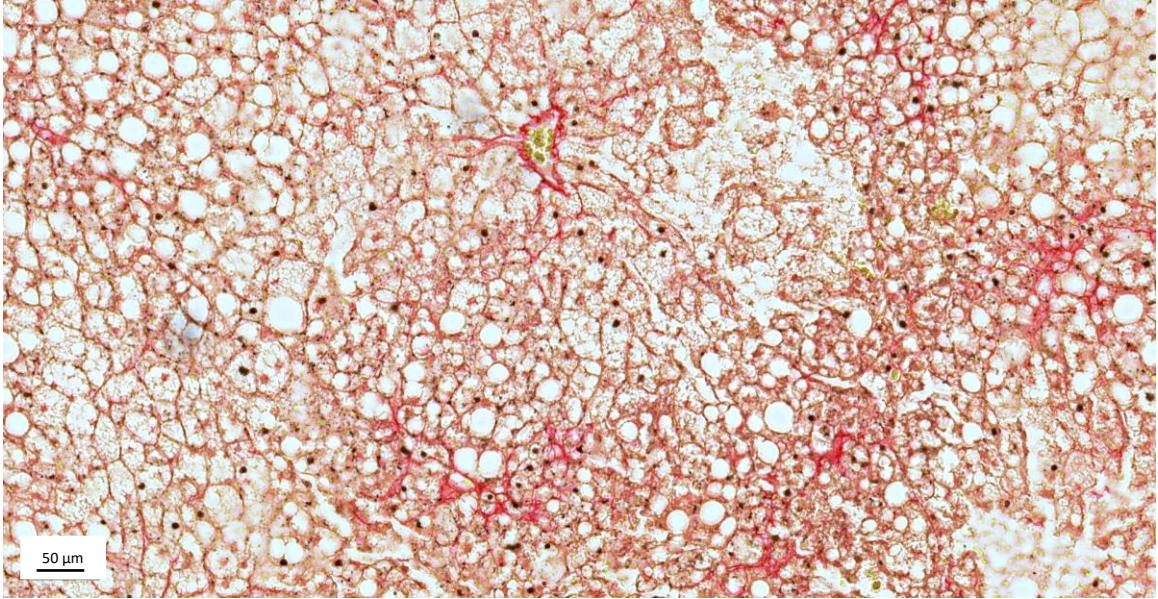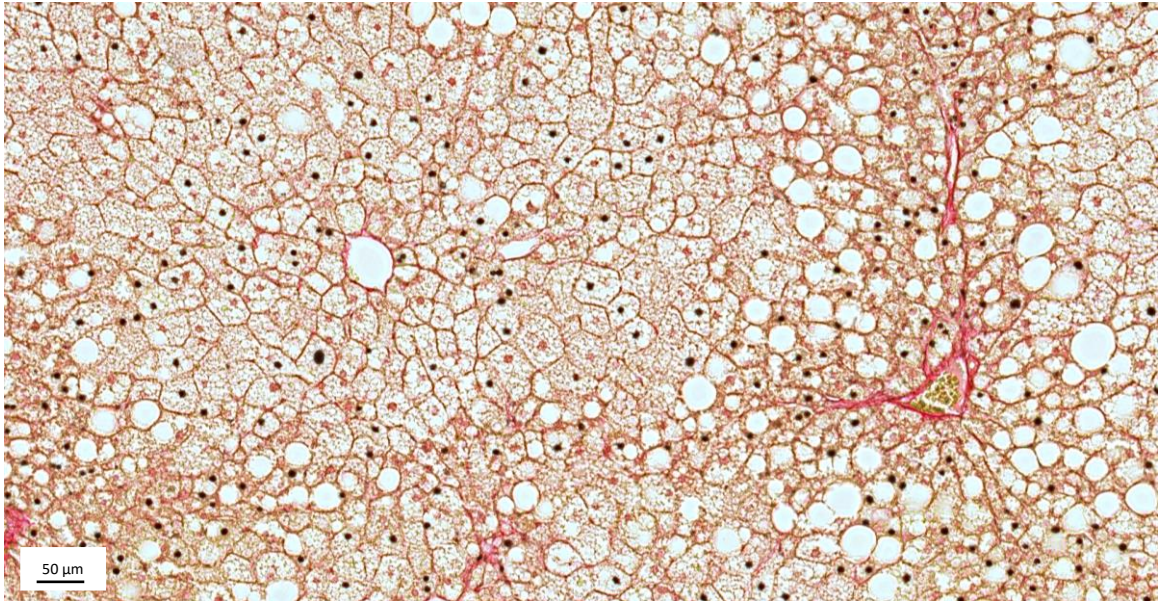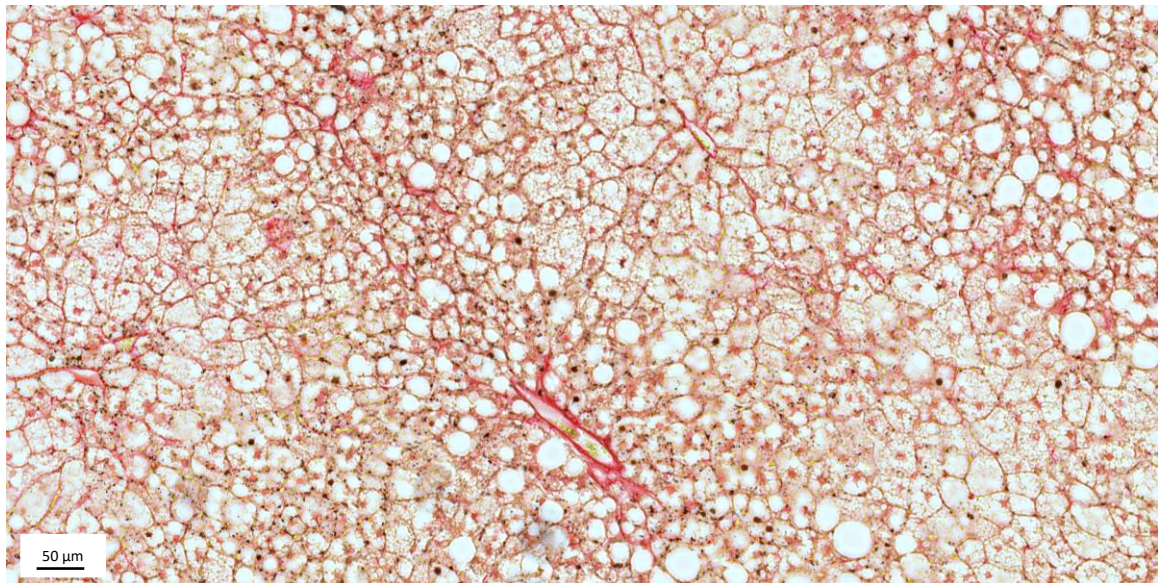



## **Sirius red Staining**

### **HFHCD-I group**

(12 mice were included)



# HFHCD-I-1

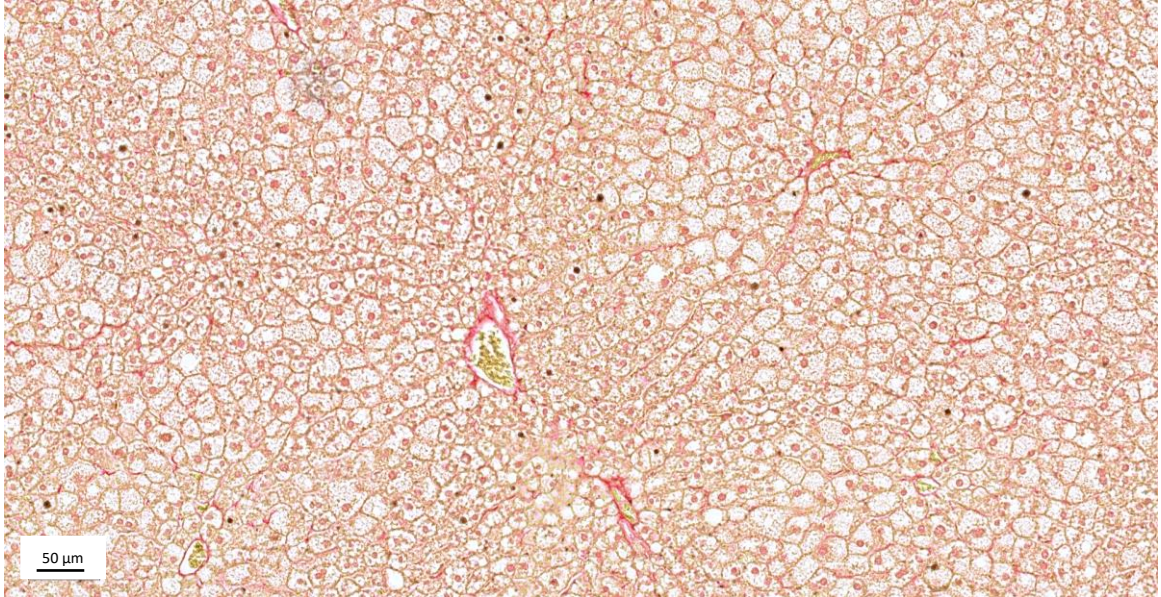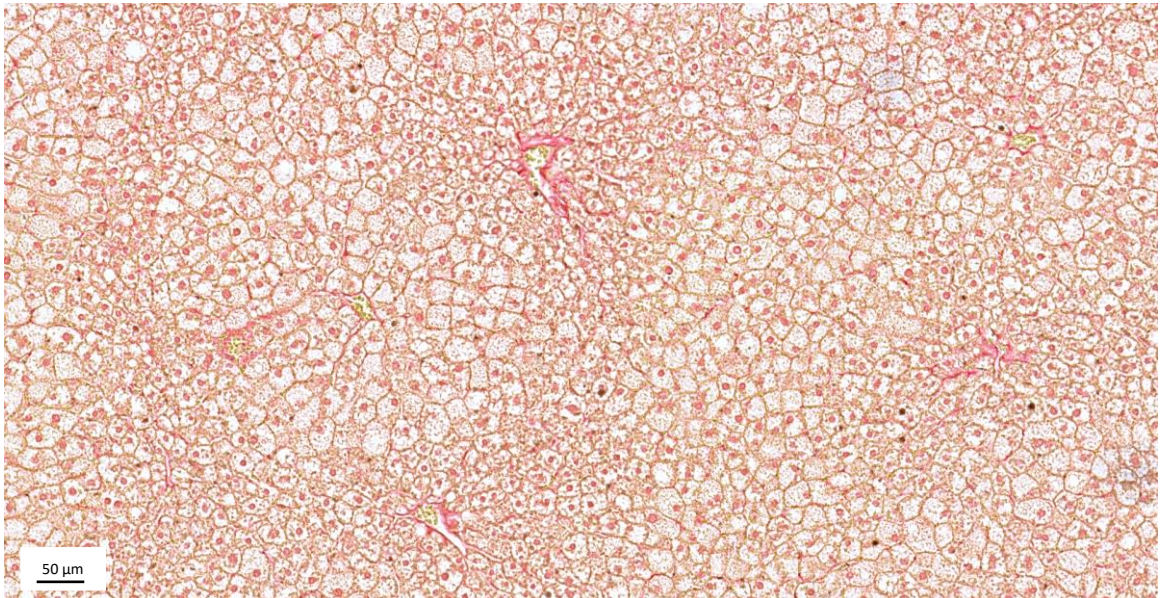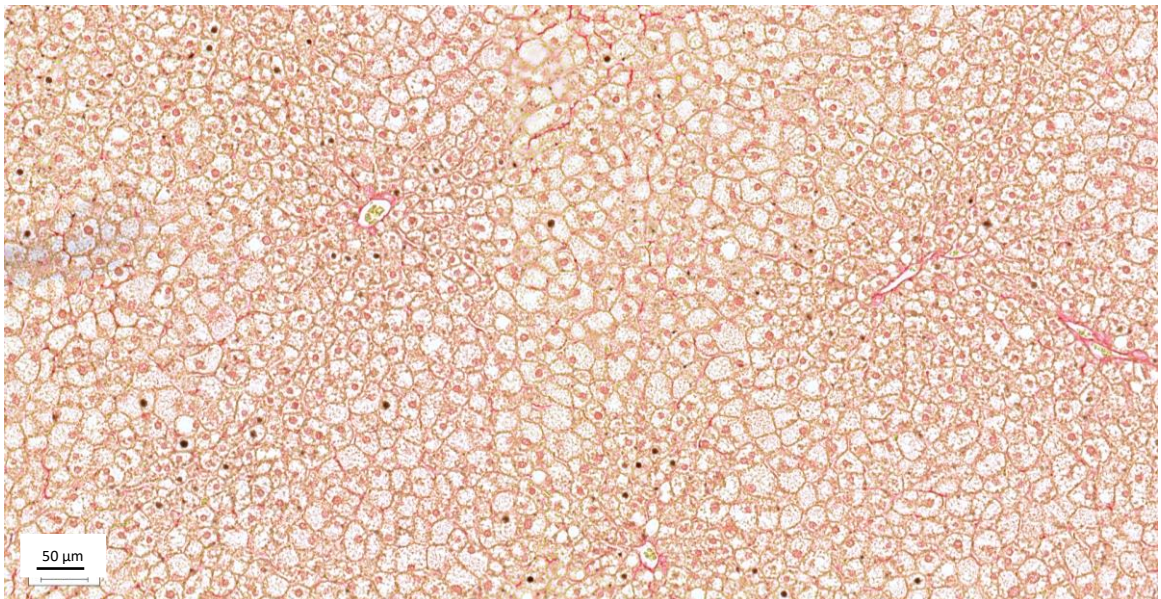



# HFHCD-I-2

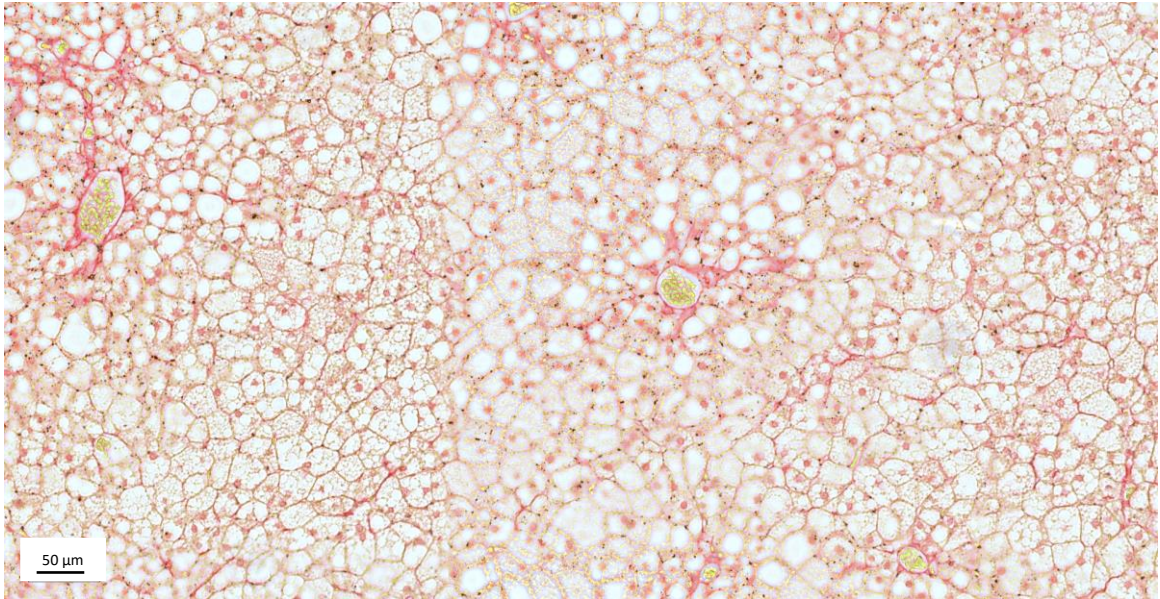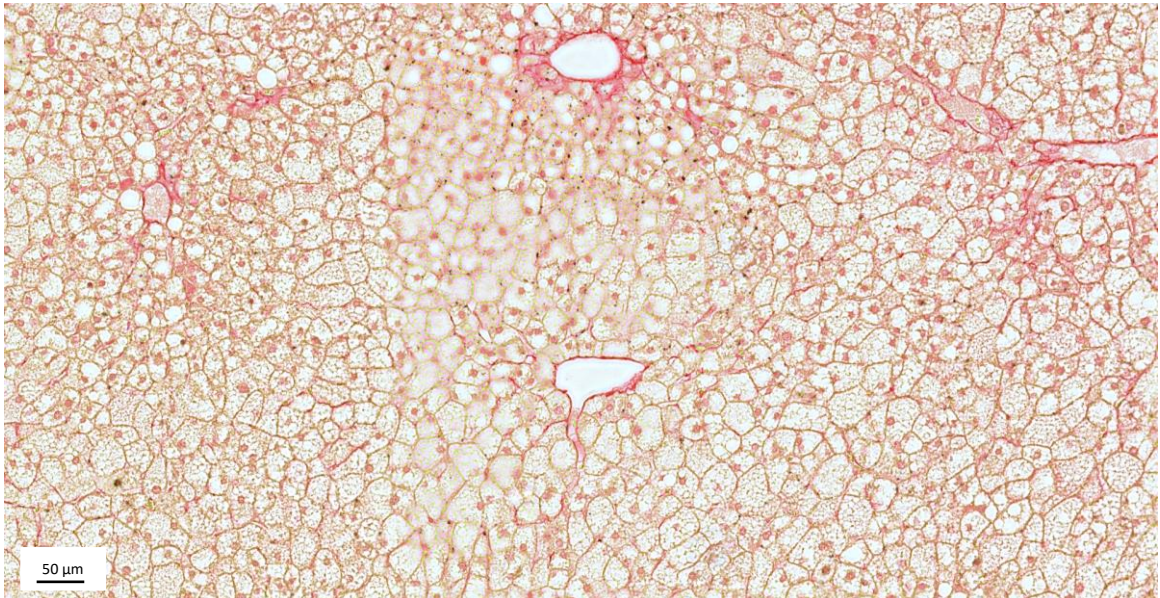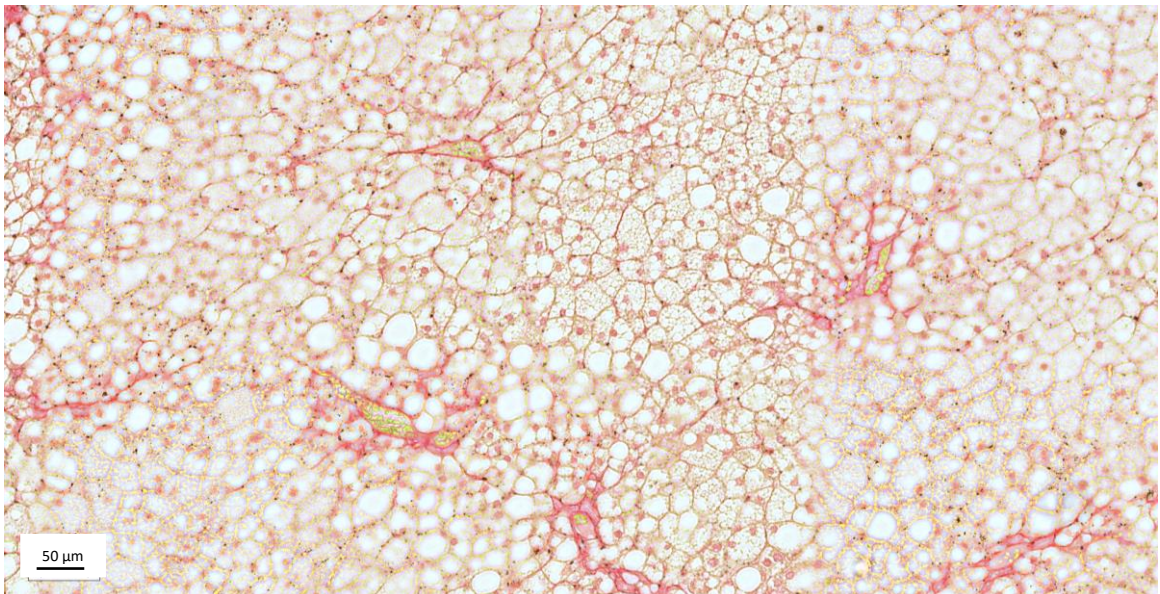



# HFHCD-I-3

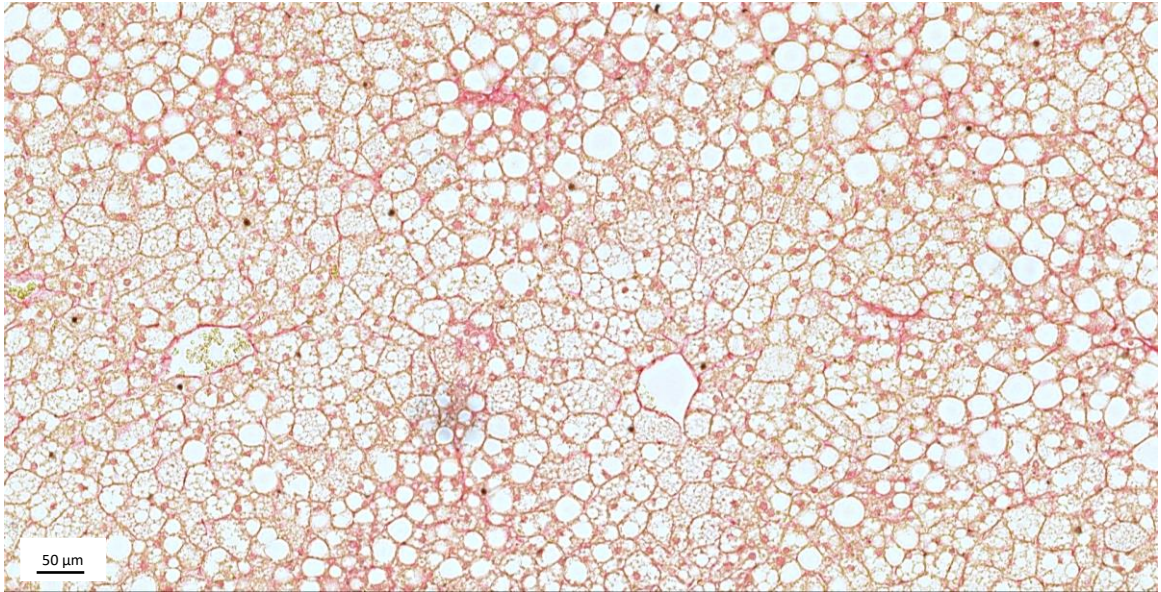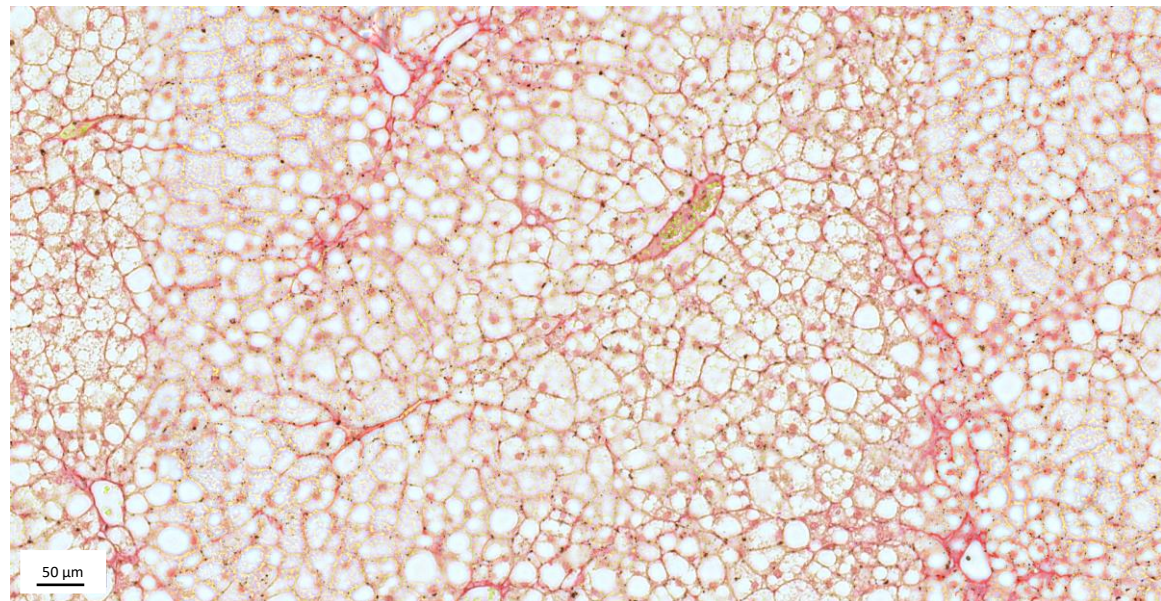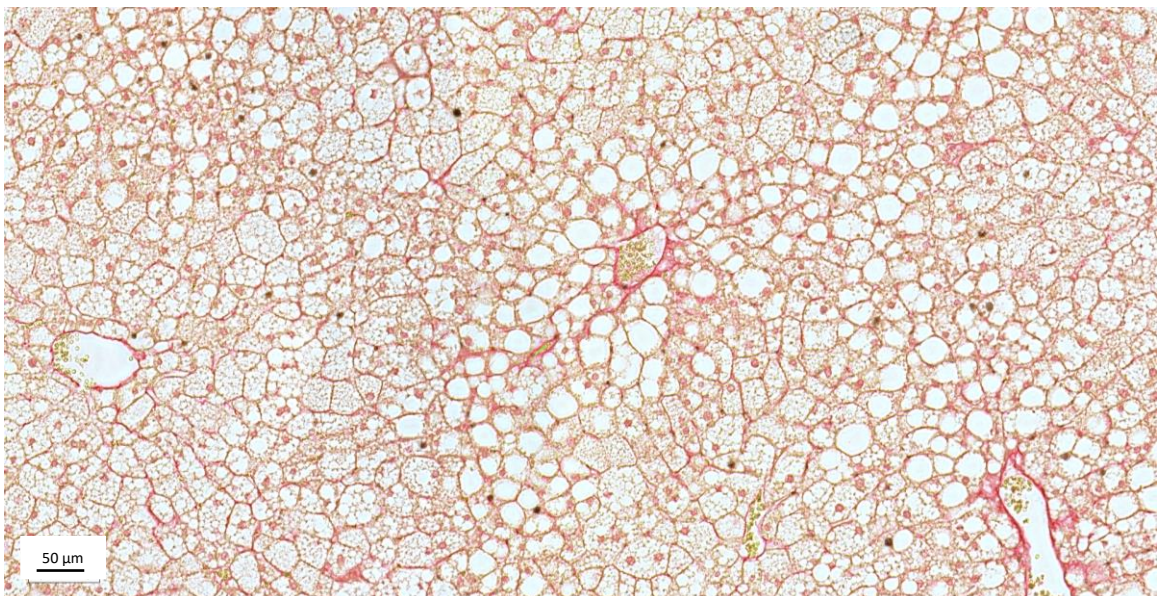



# HFHCD-I-4

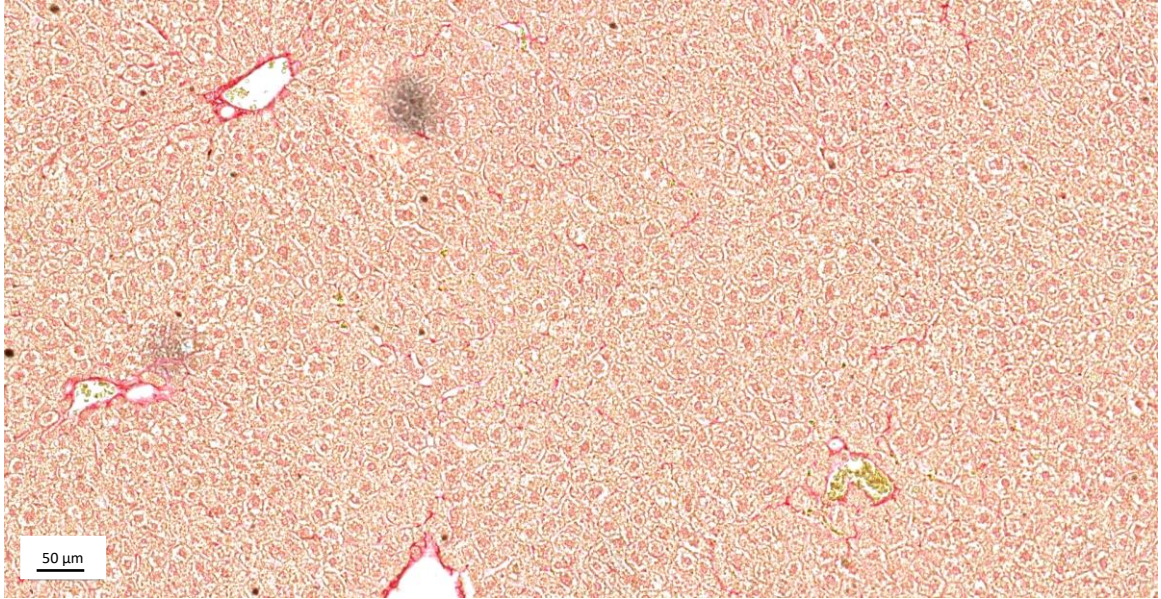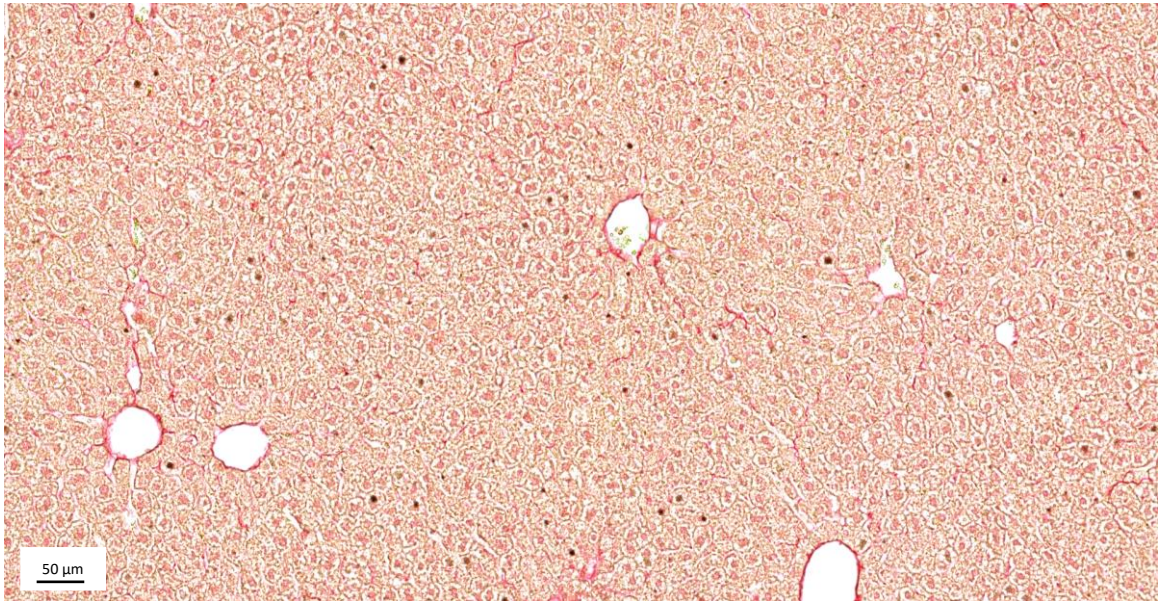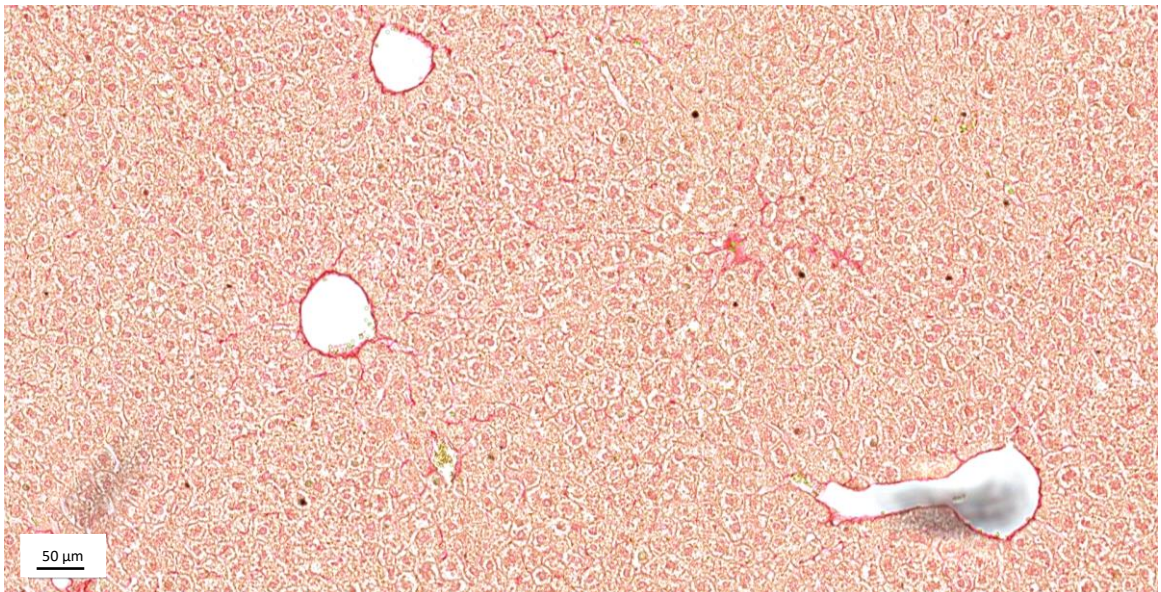



# HFHCD-I-5

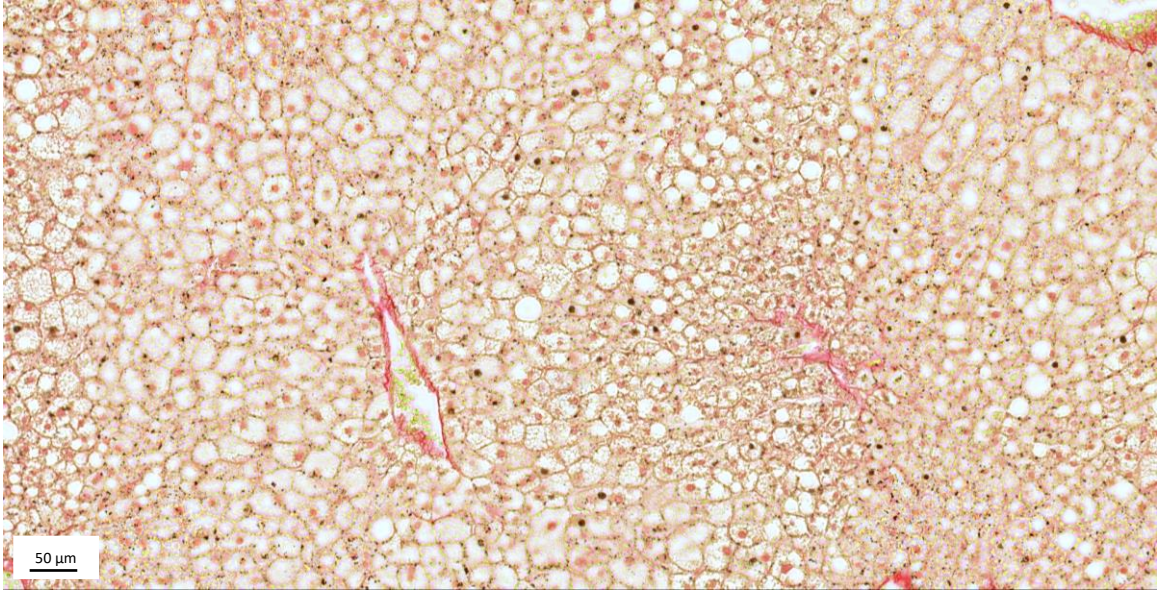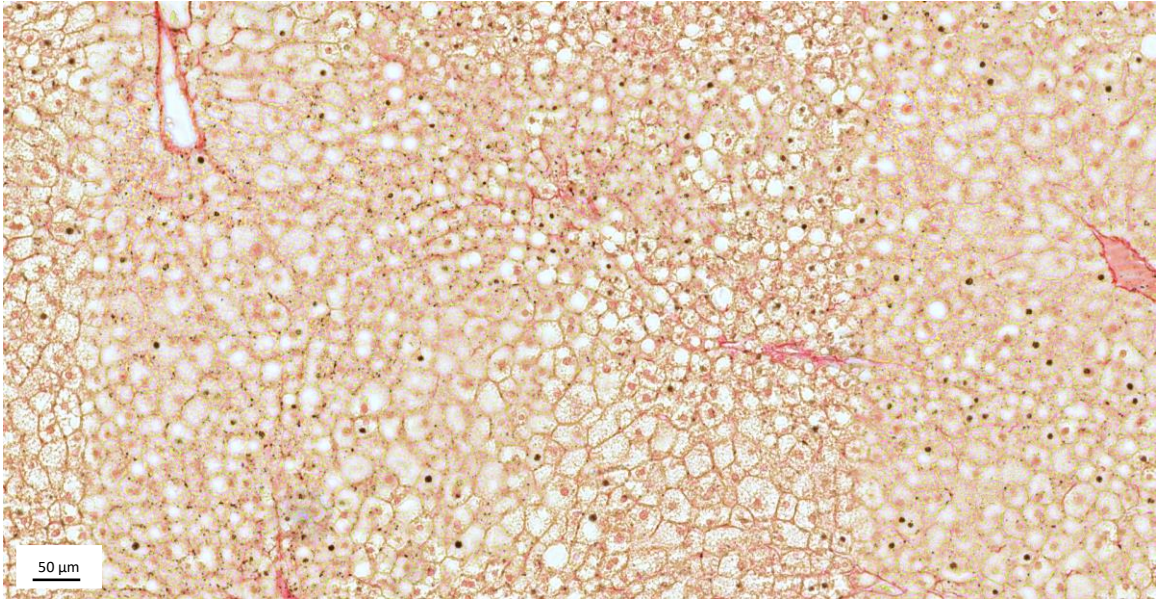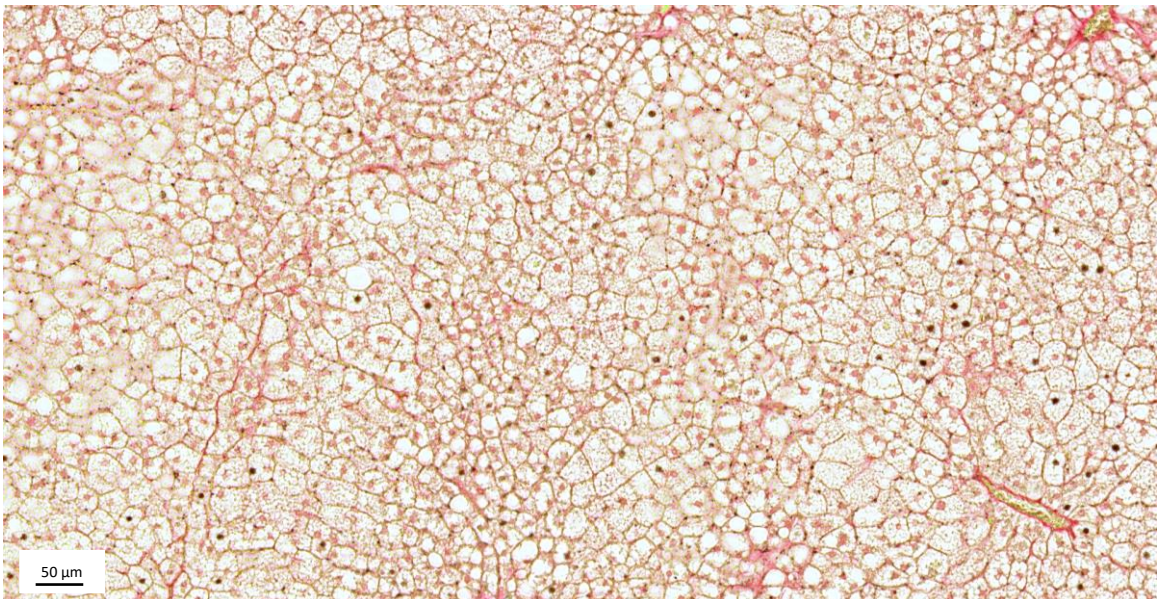



# HFHCD-I-6

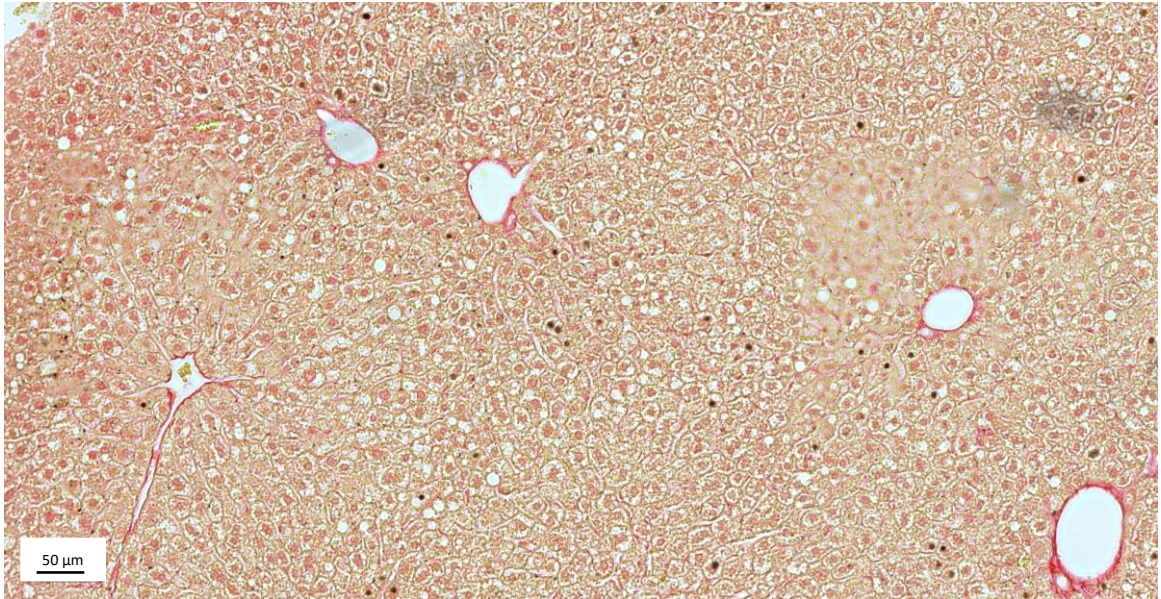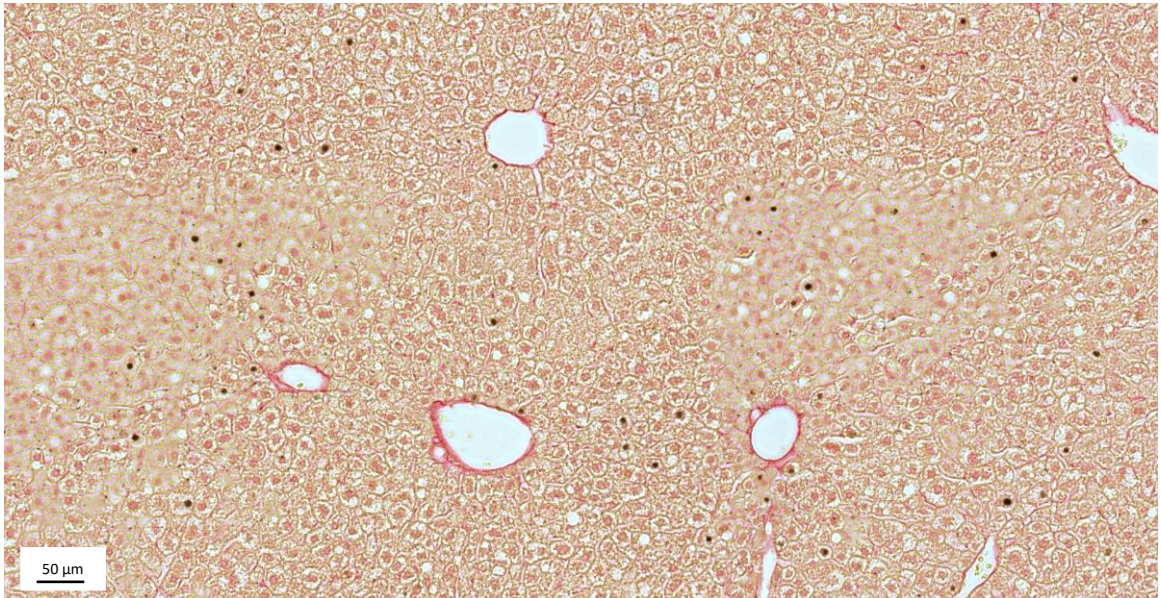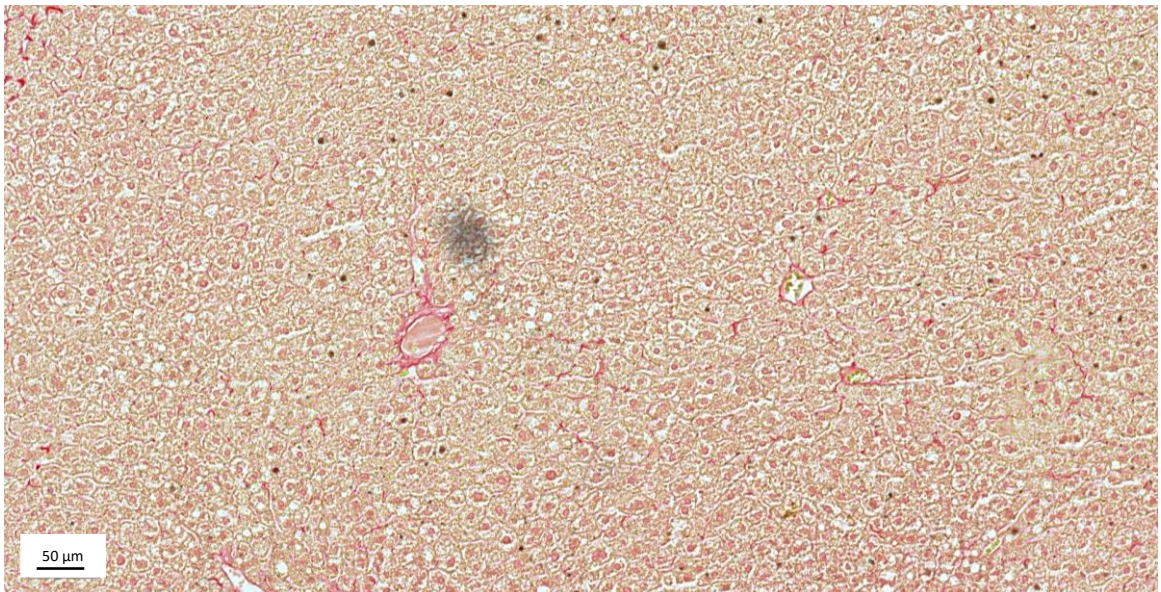



# HFHCD-I-7

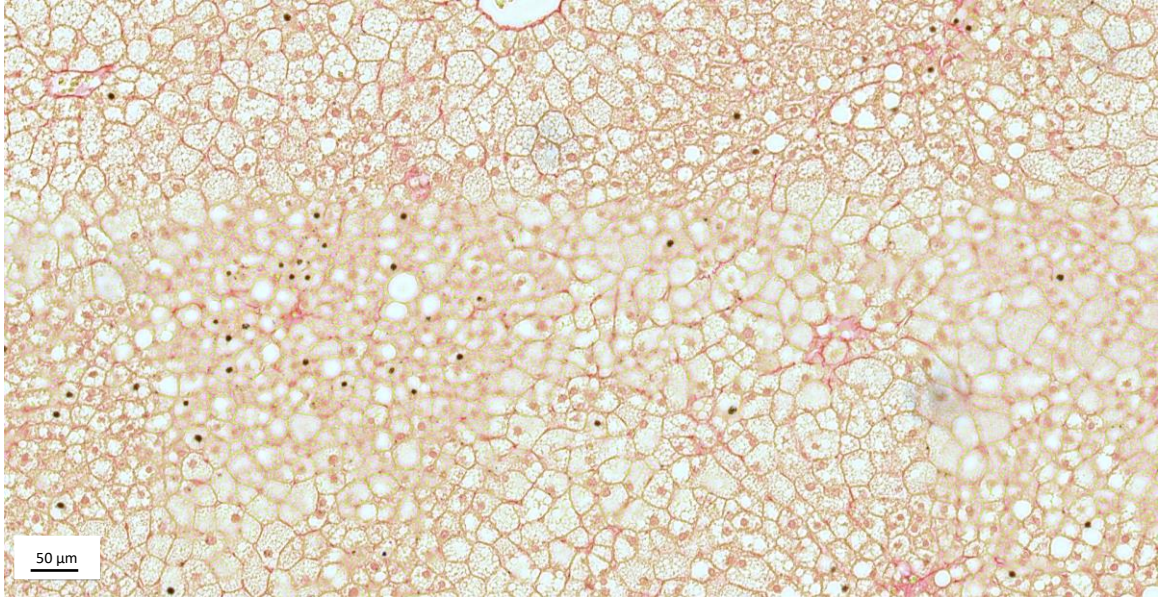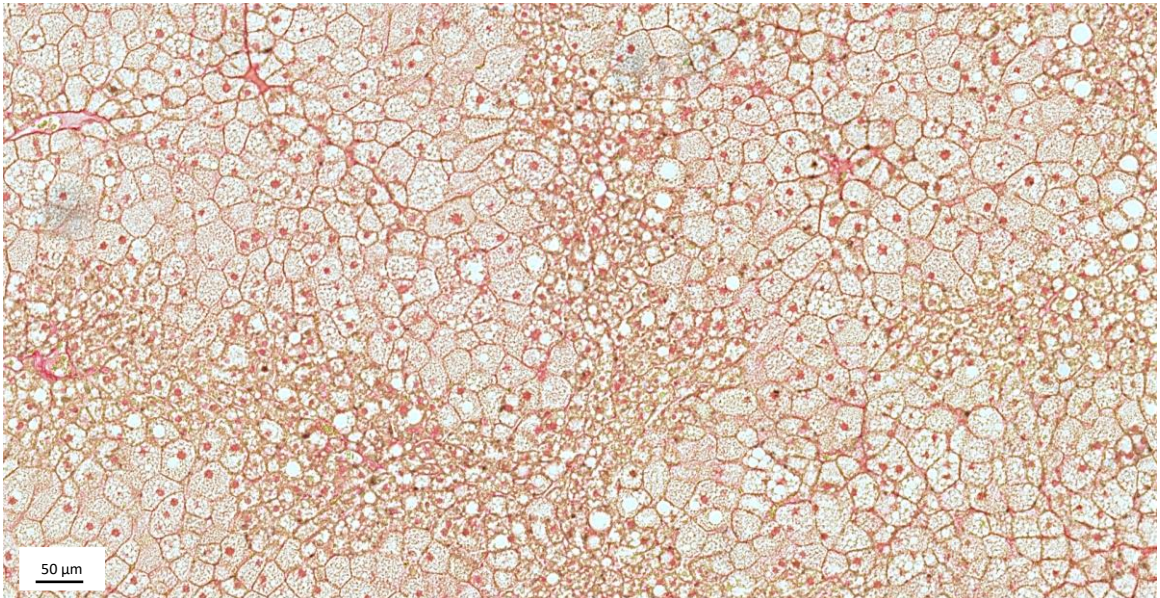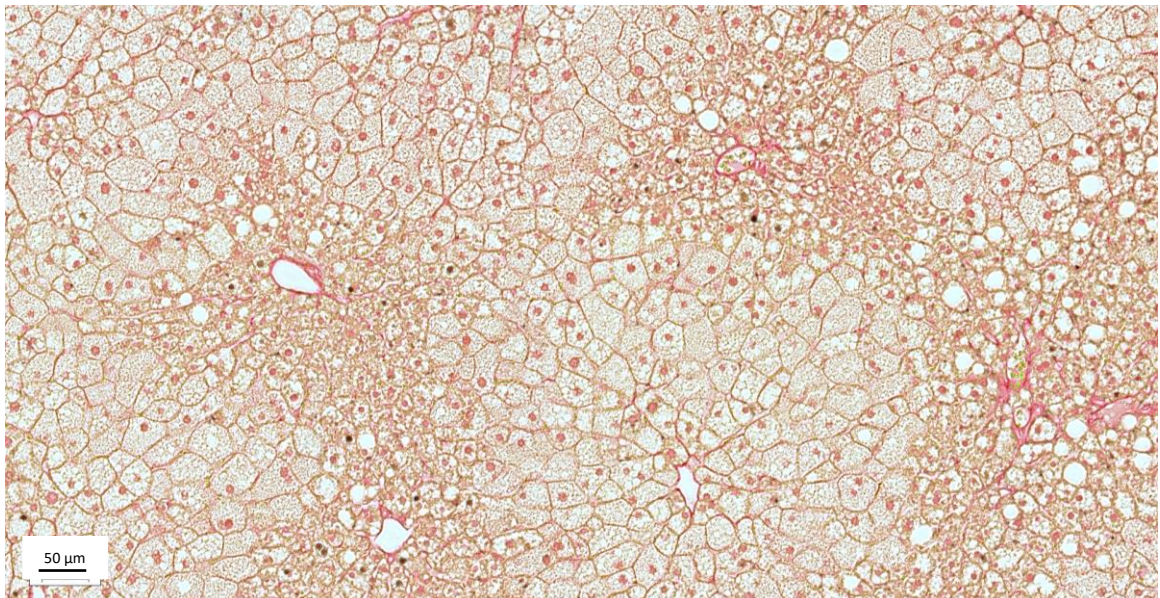



# HFHCD-I-8

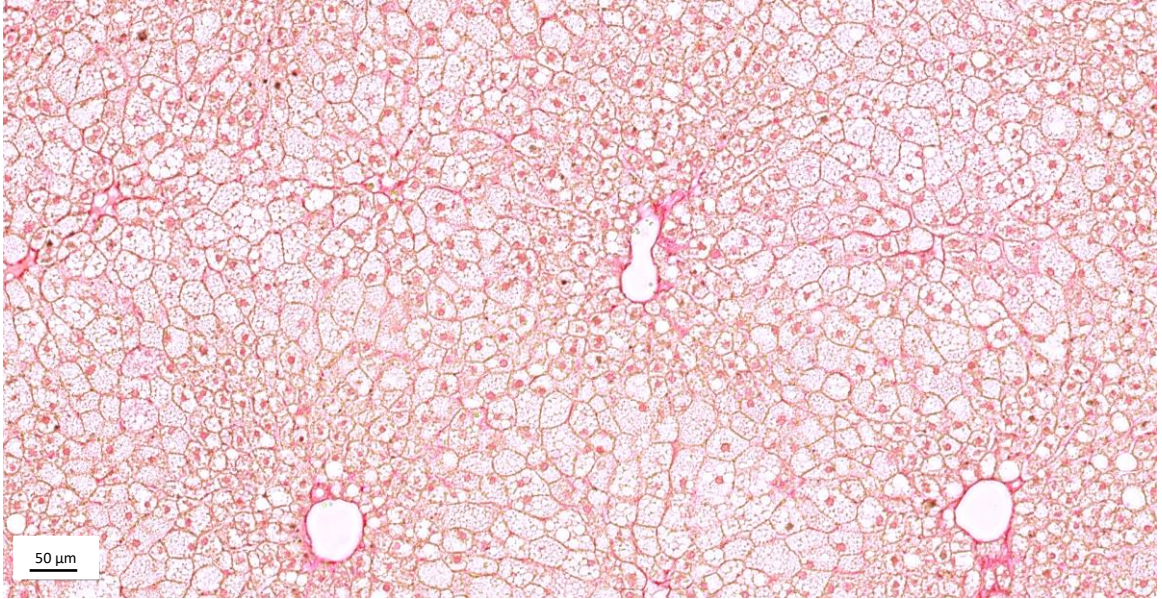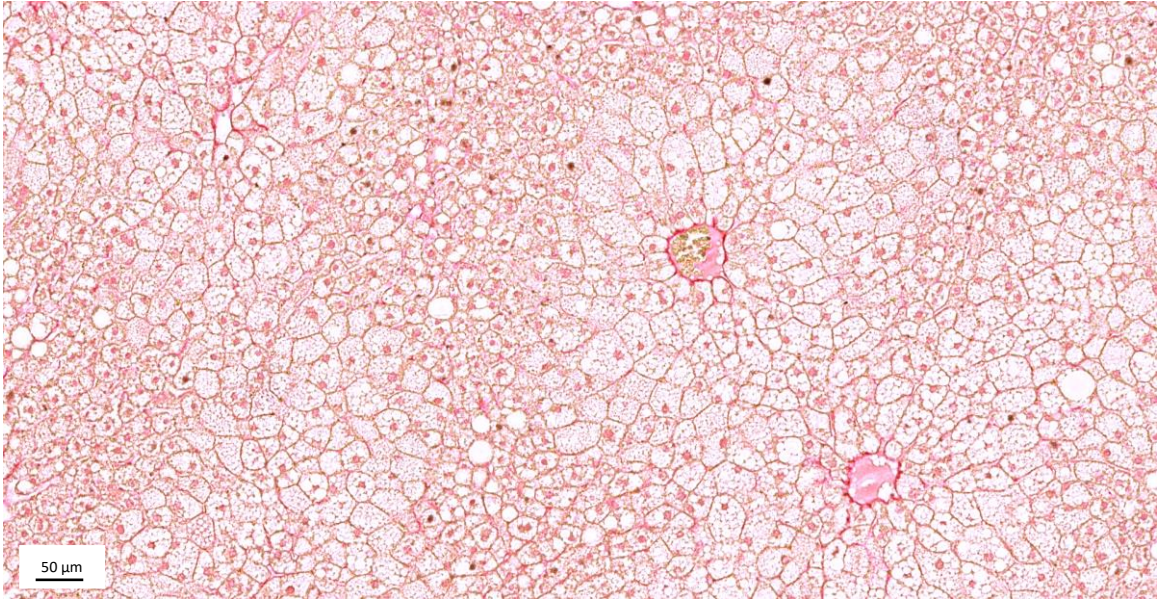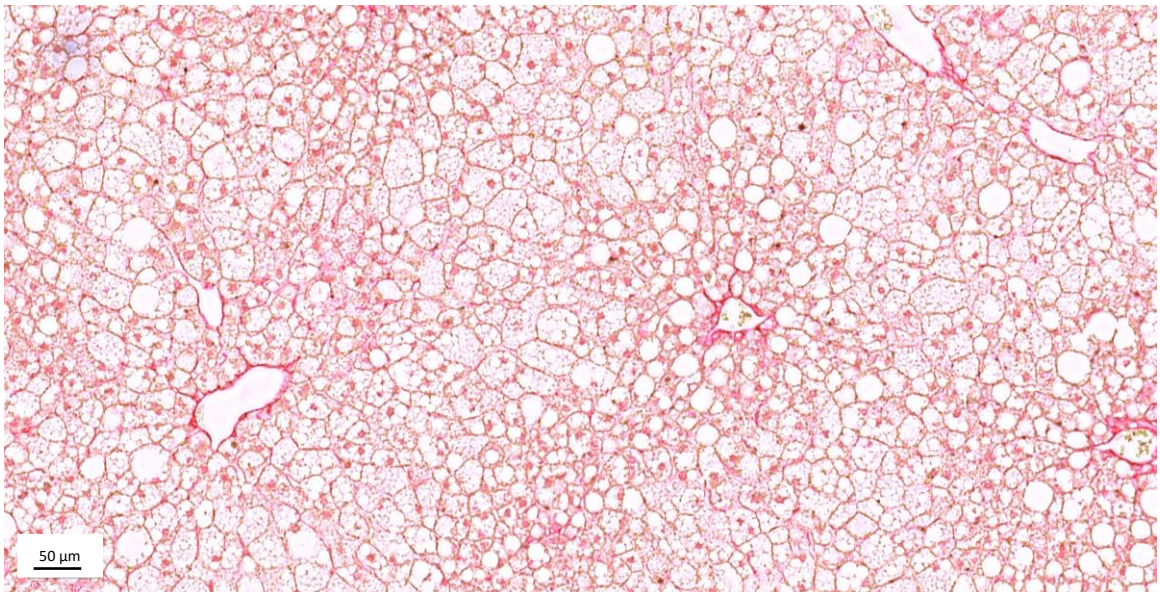



# HFHCD-I-9

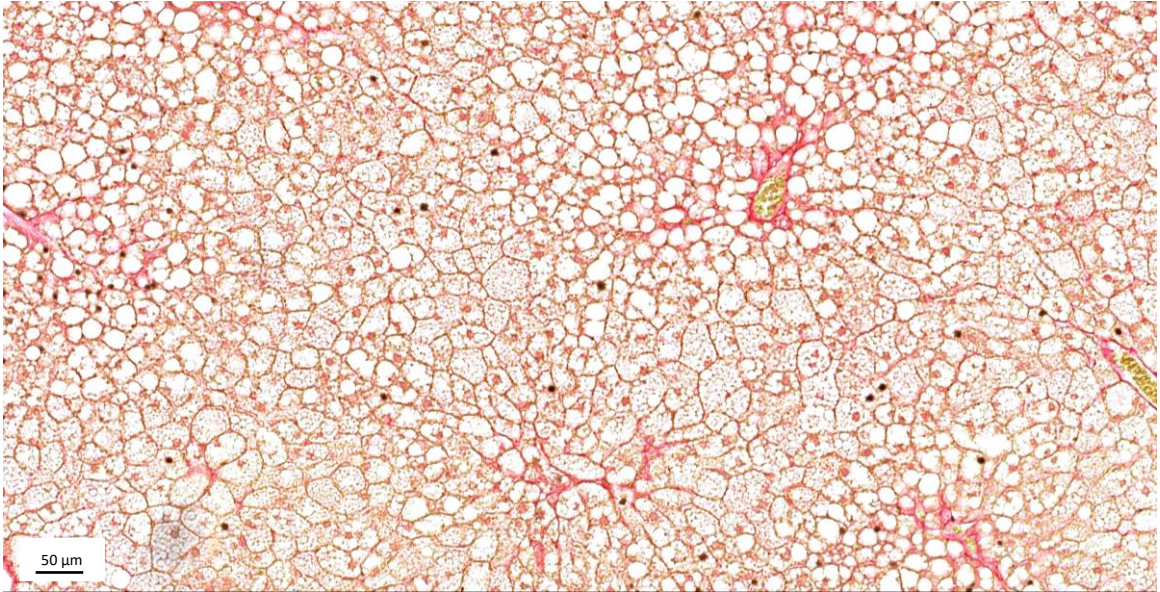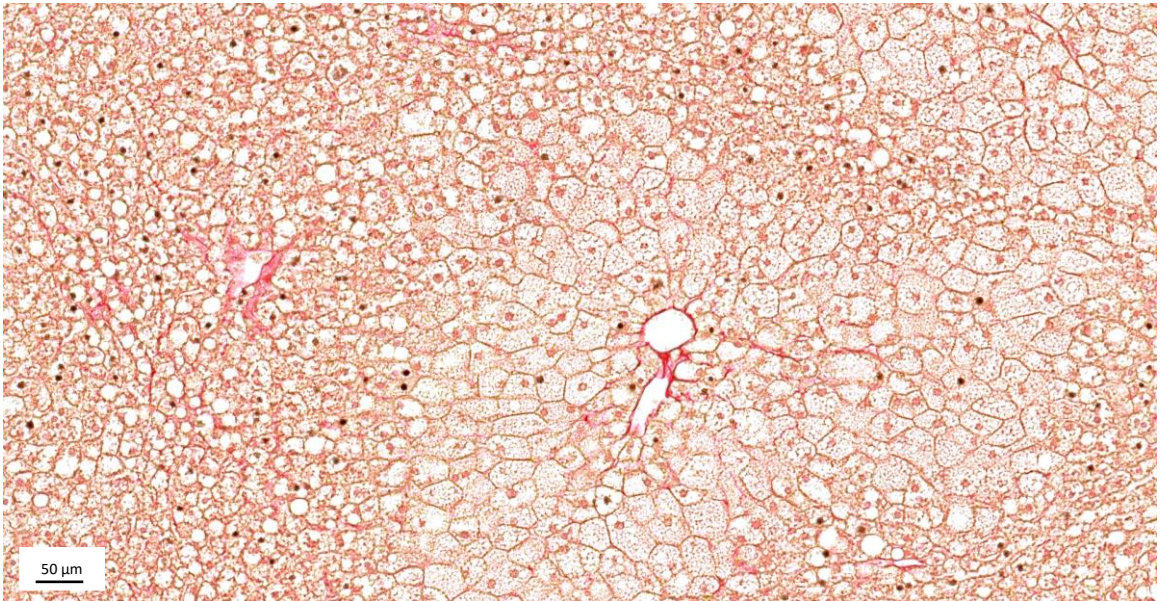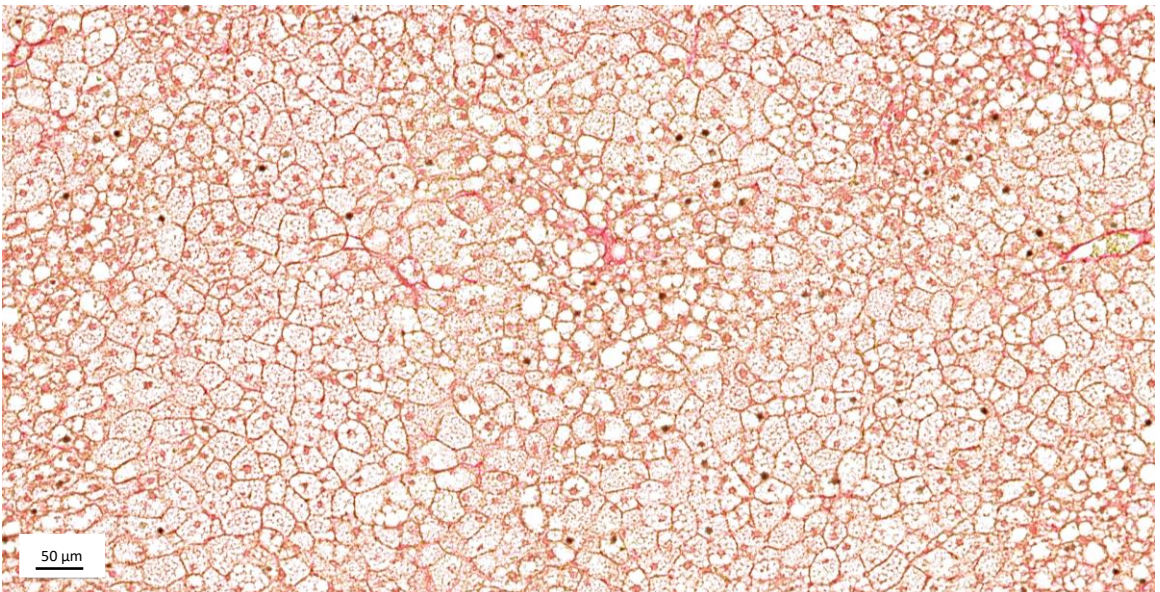



# HFHCD-I-10

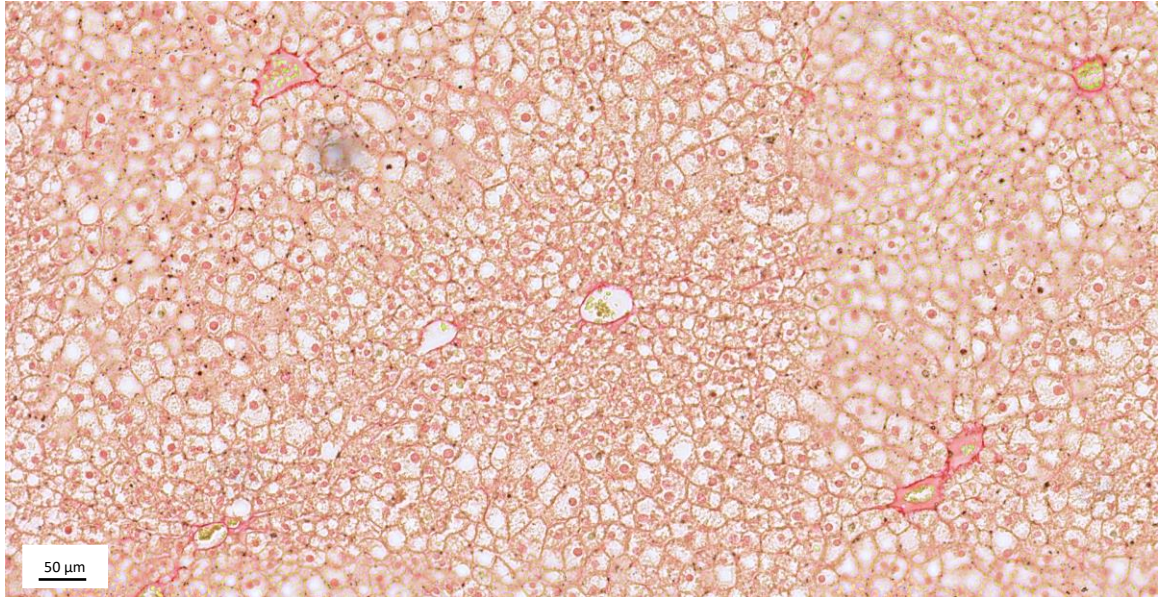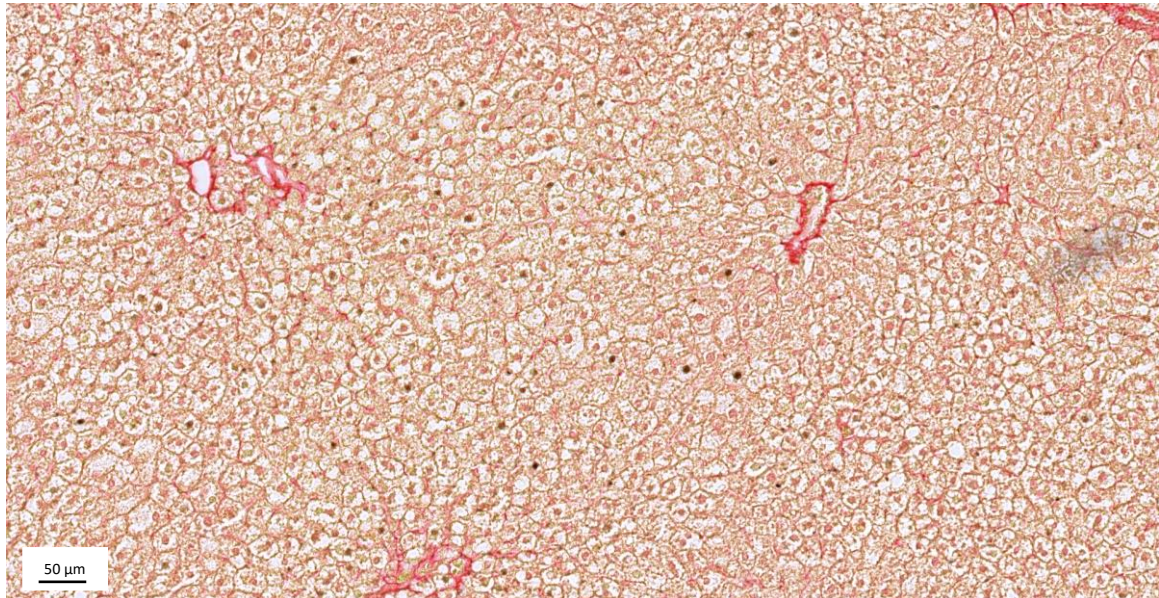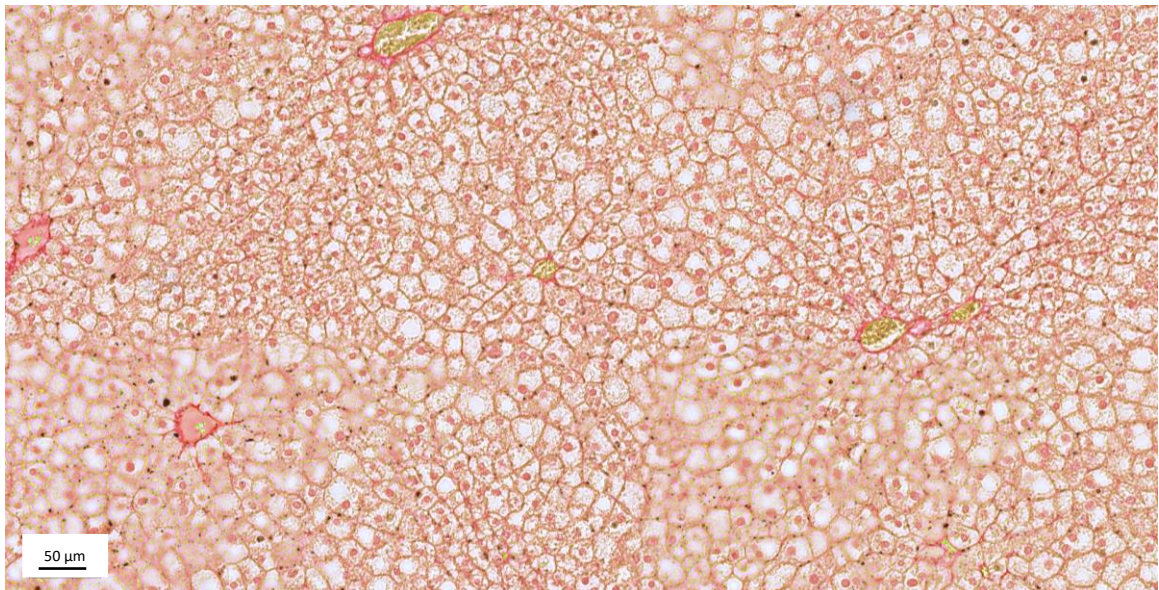



# HFHCD-I-11

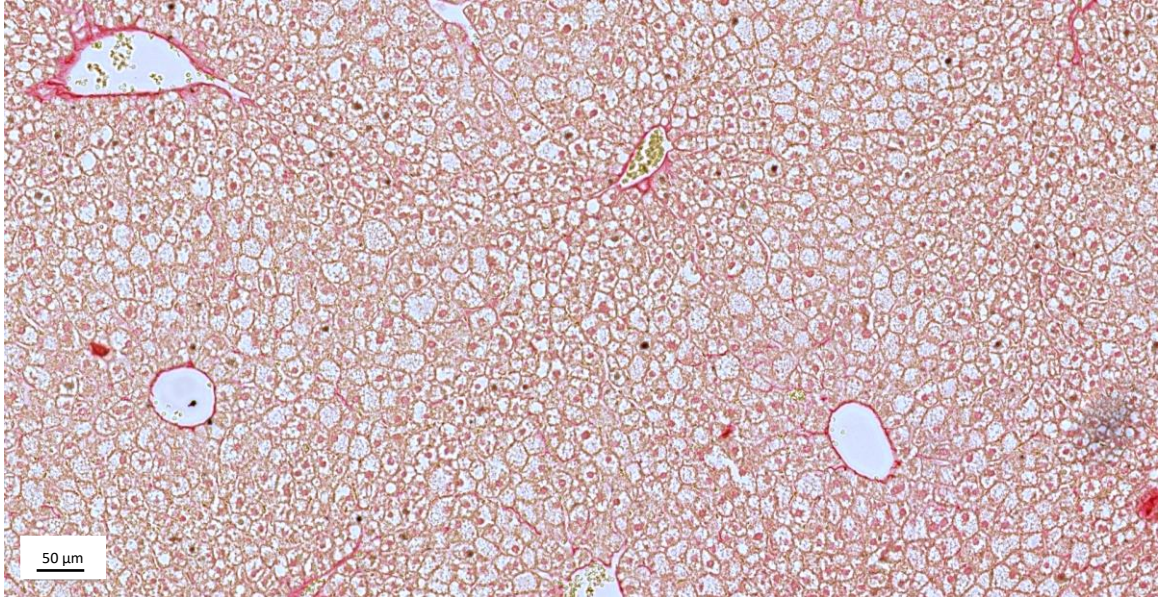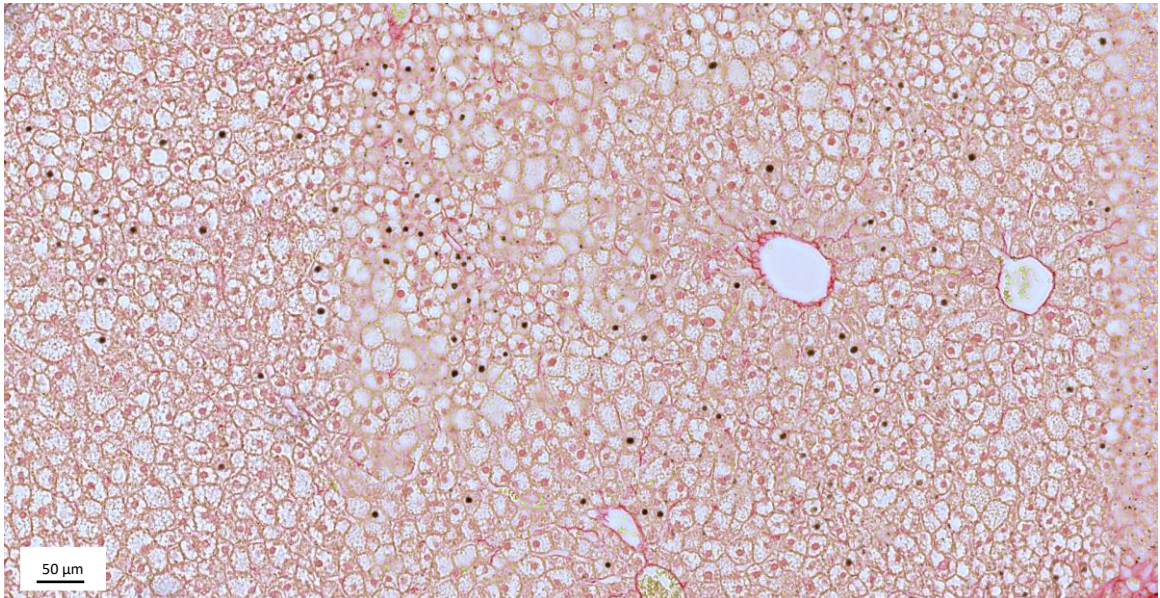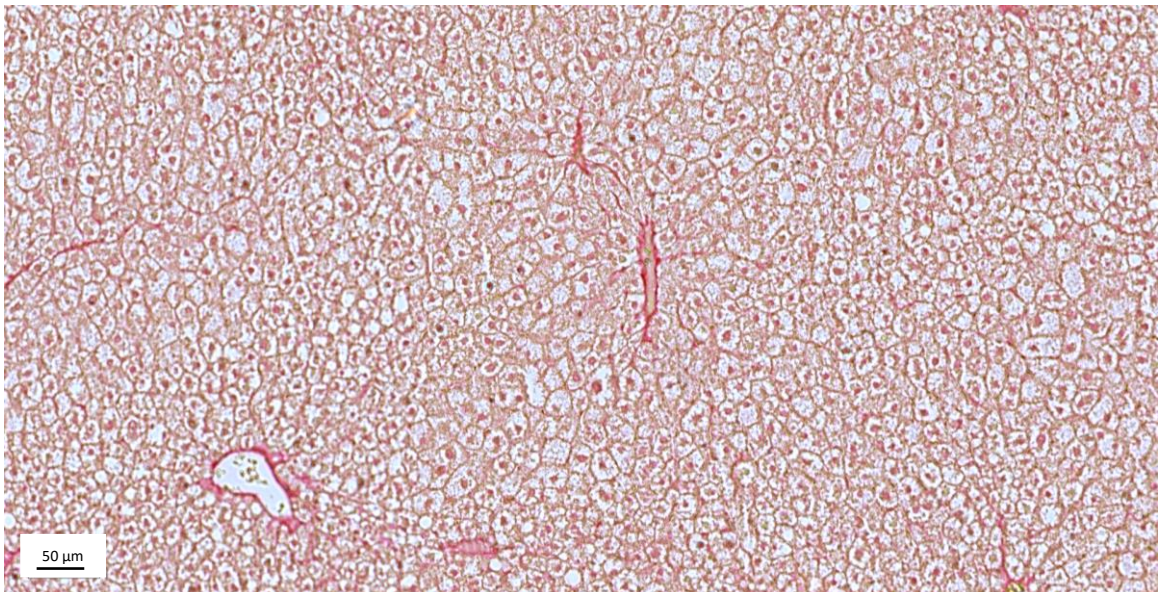



# HFHCD-I-12

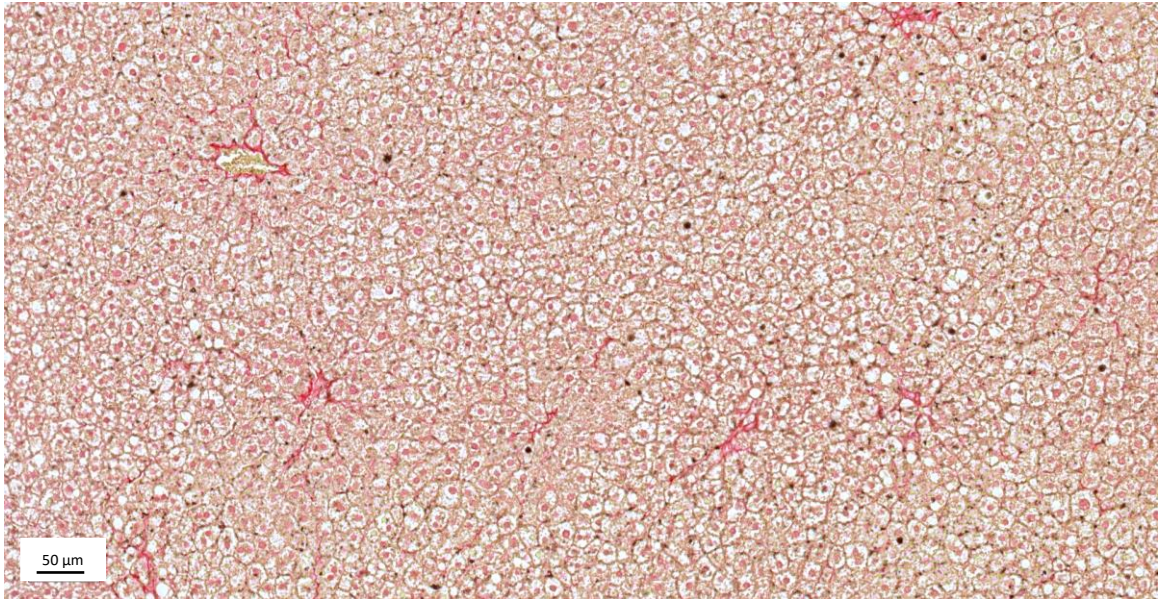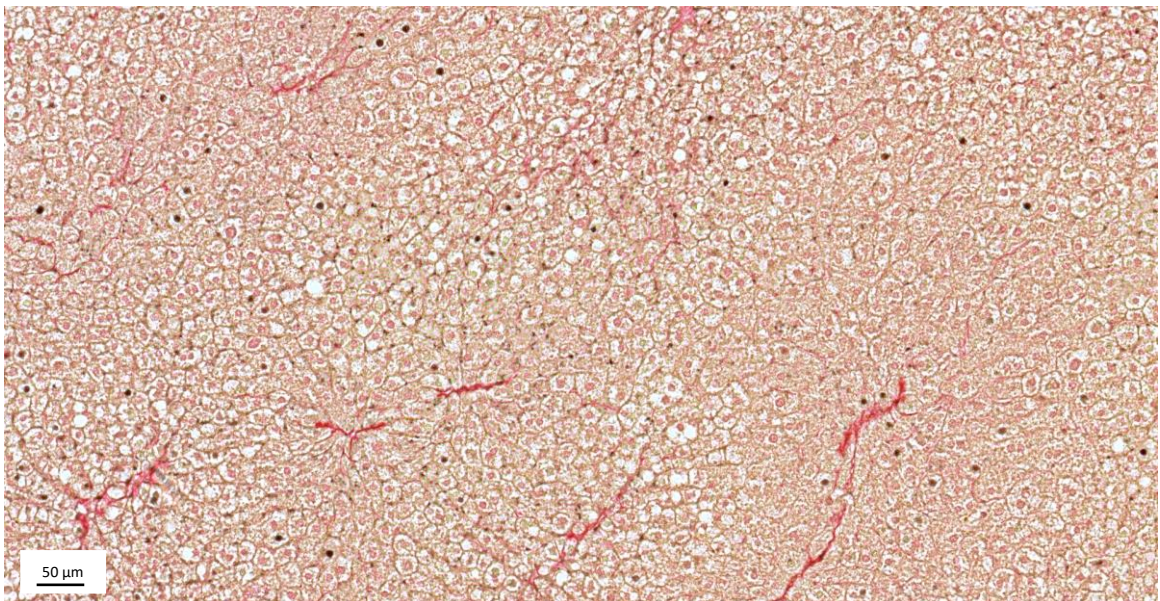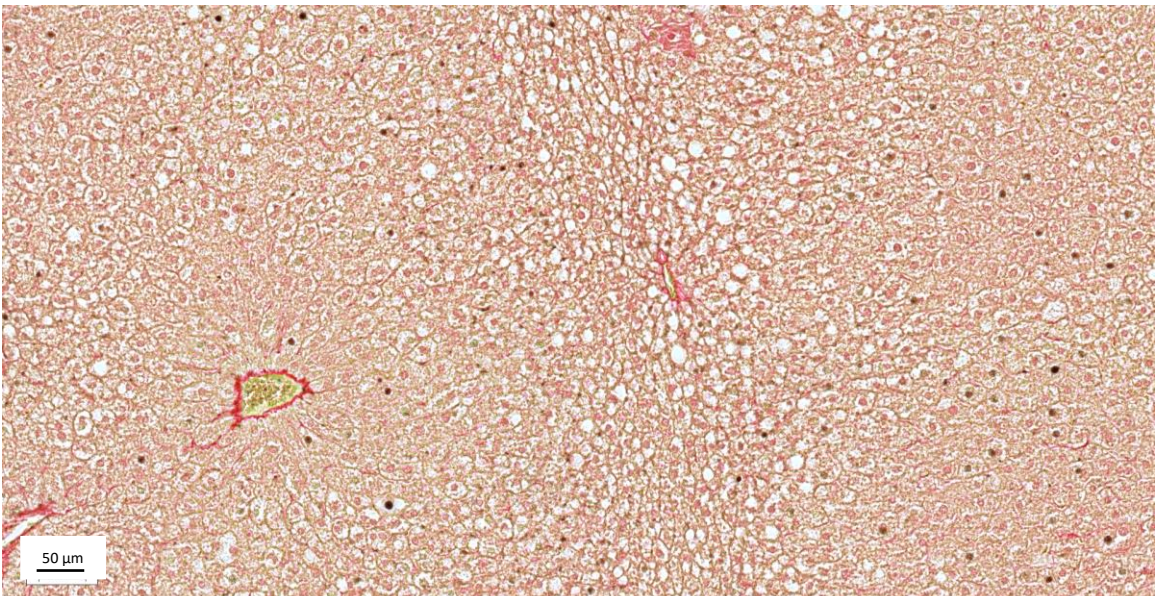



**Sirius red Staining**

**HFHCD-C group**

(12 mice were included)



# HFHCD-C-1

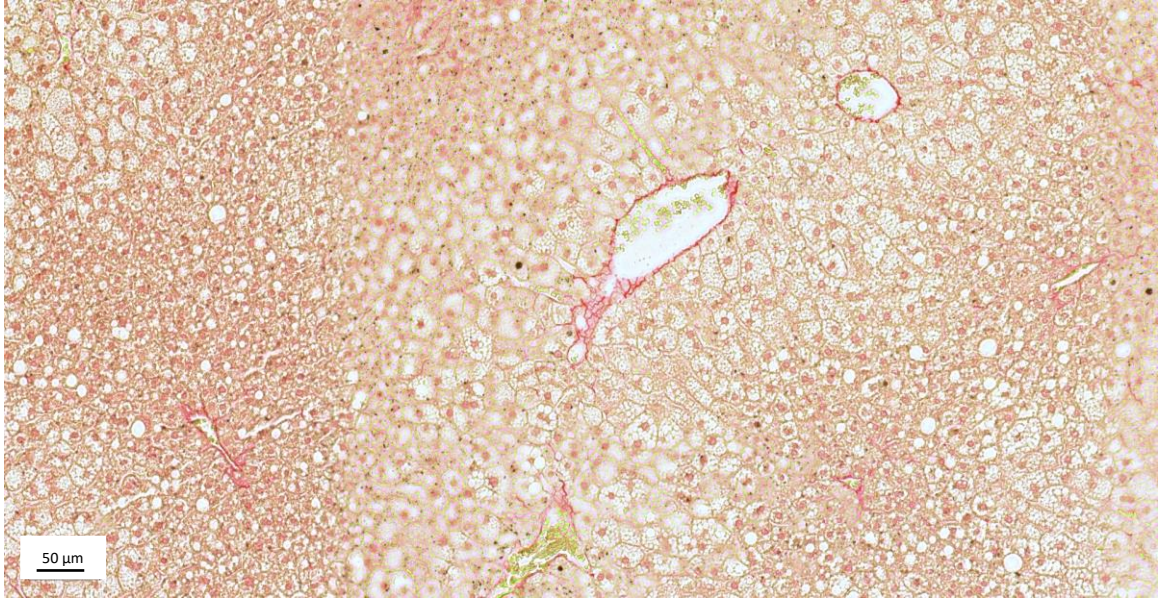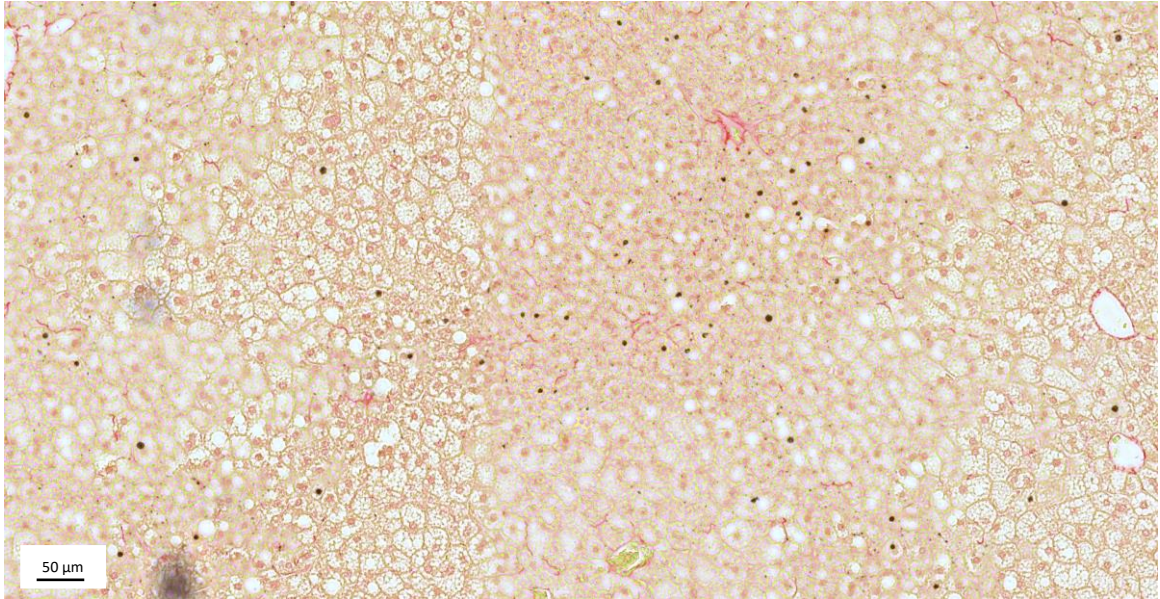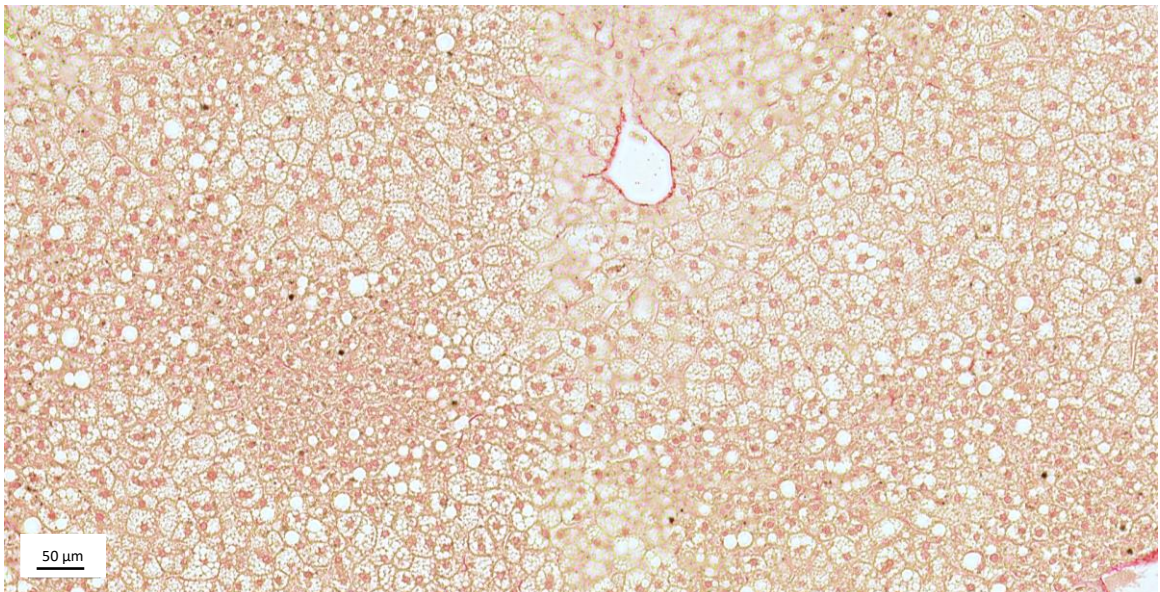



# HFHCD-C-2

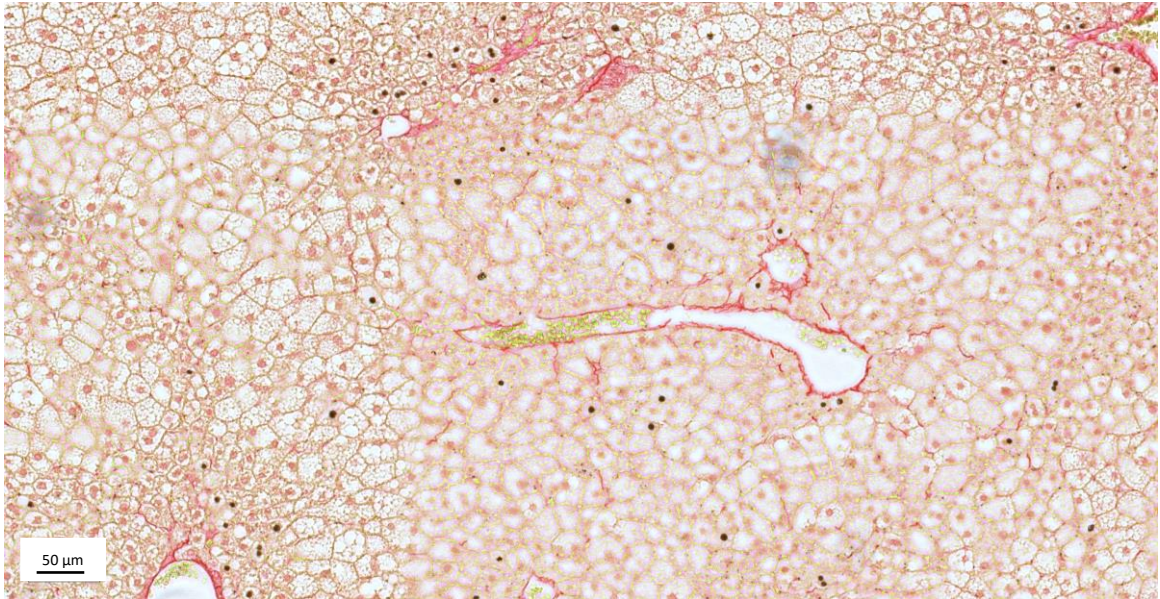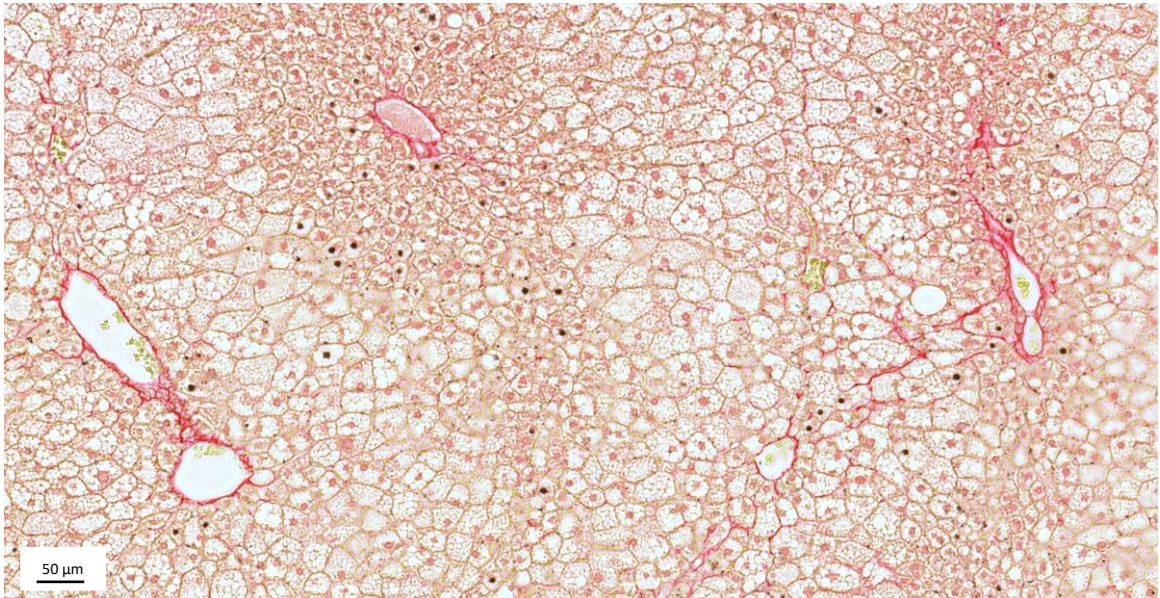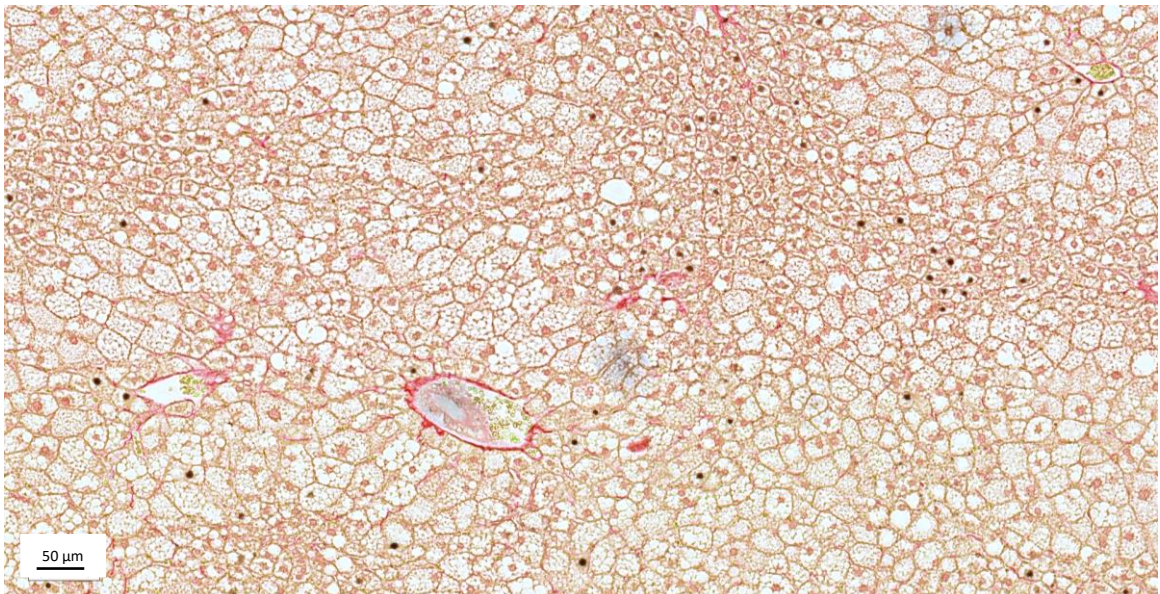



# HFHCD-C-3

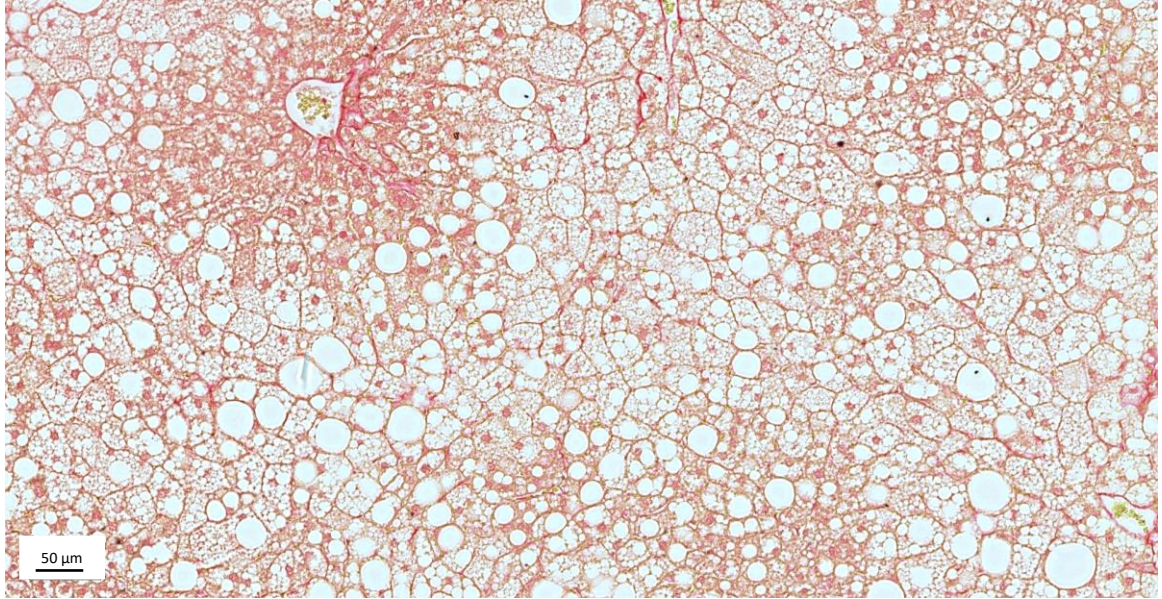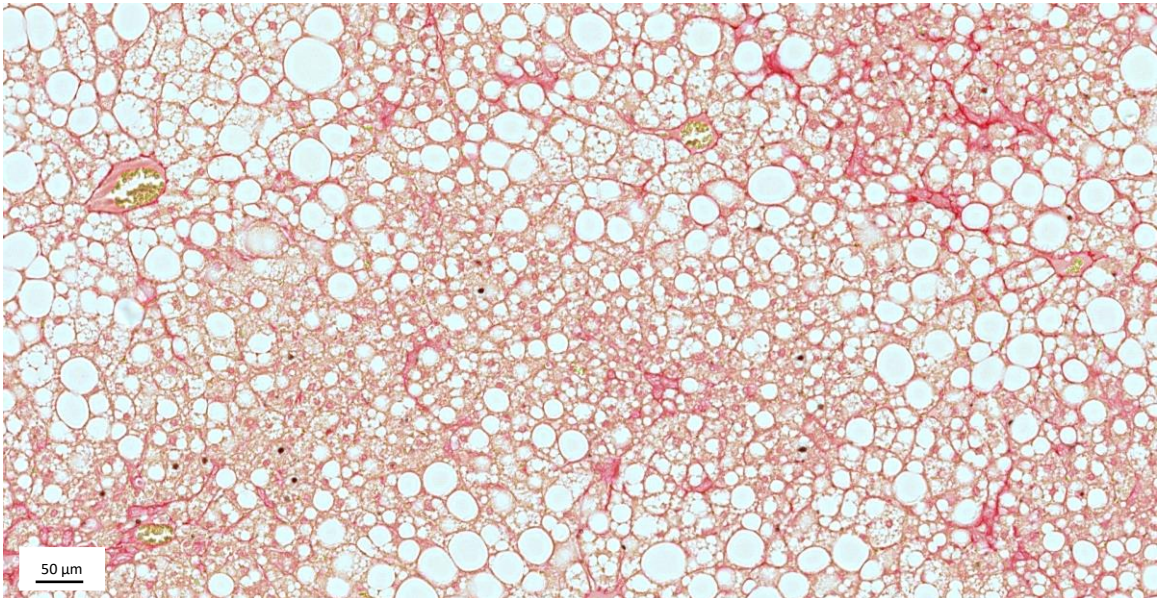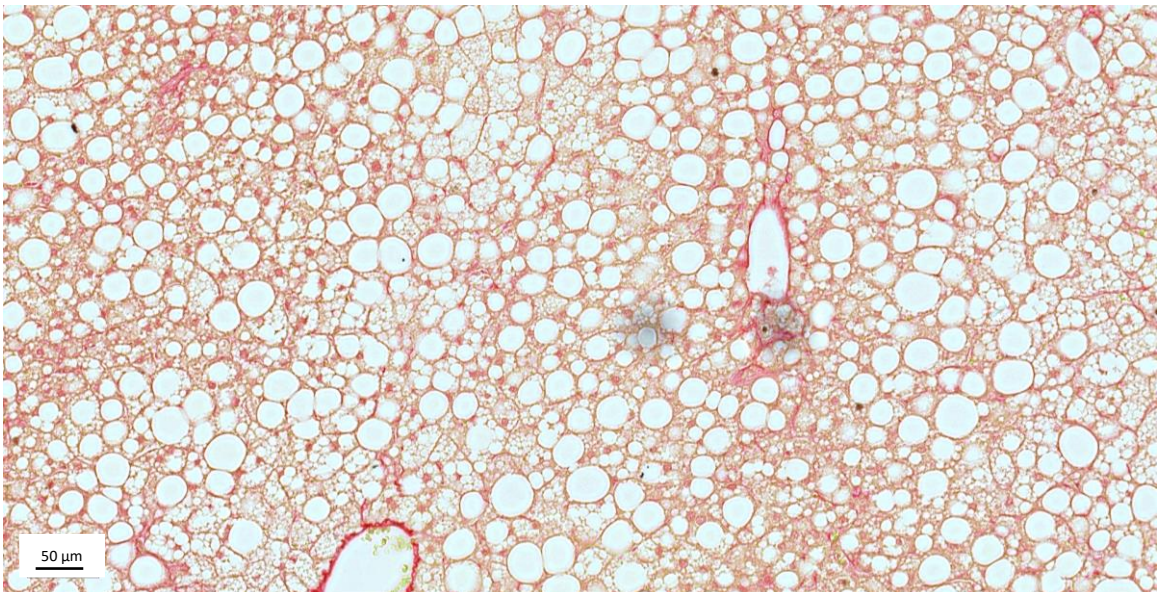



# HFHCD-C-4

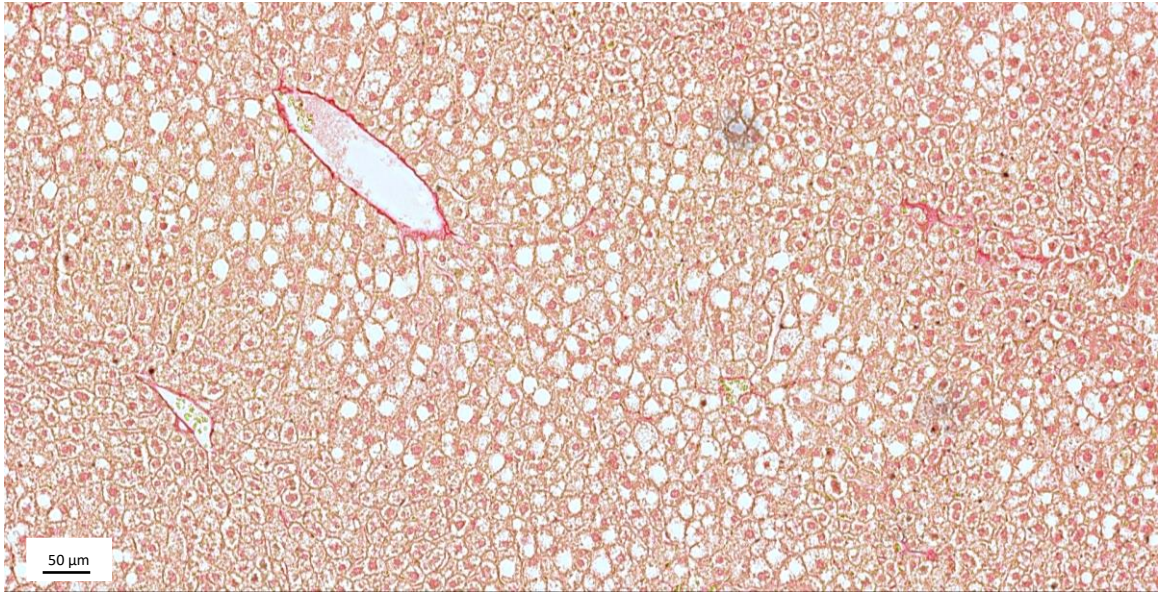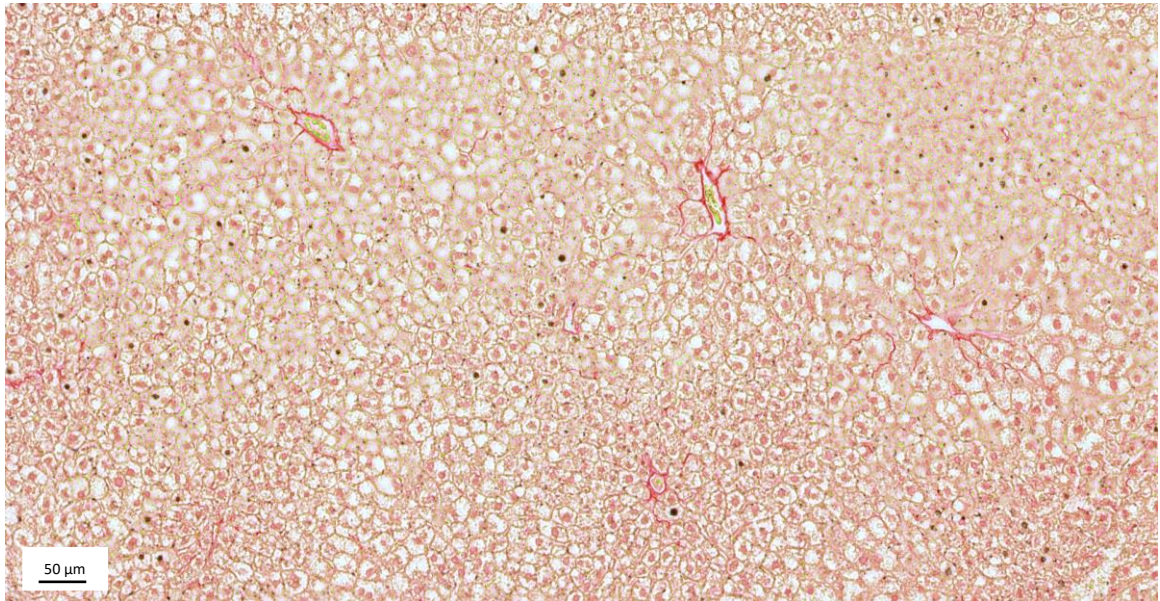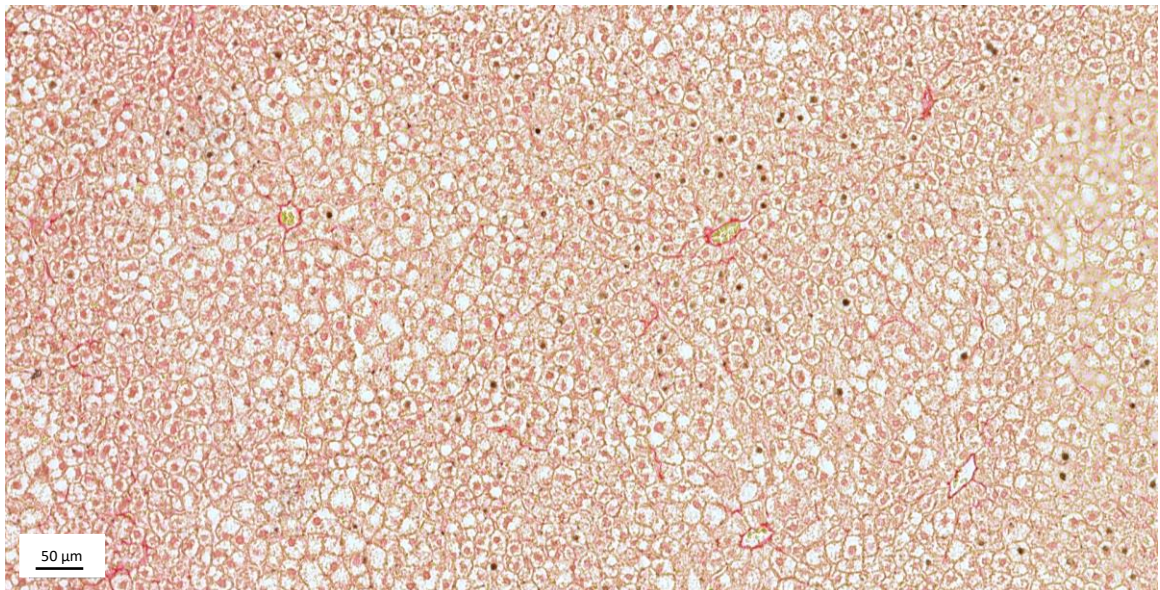



# HFHCD-C-5

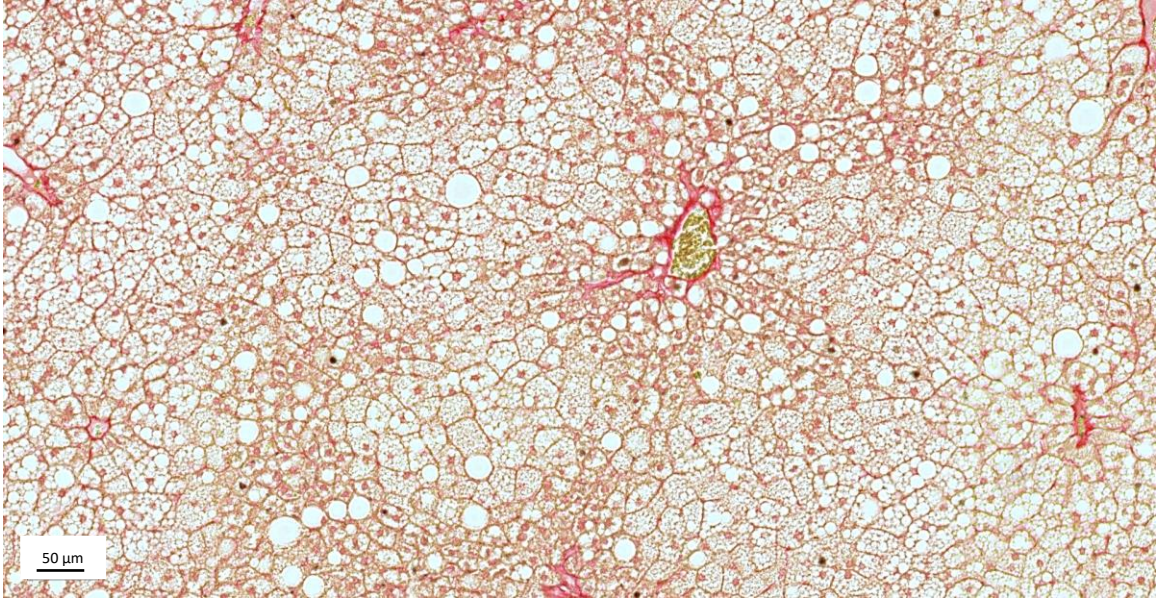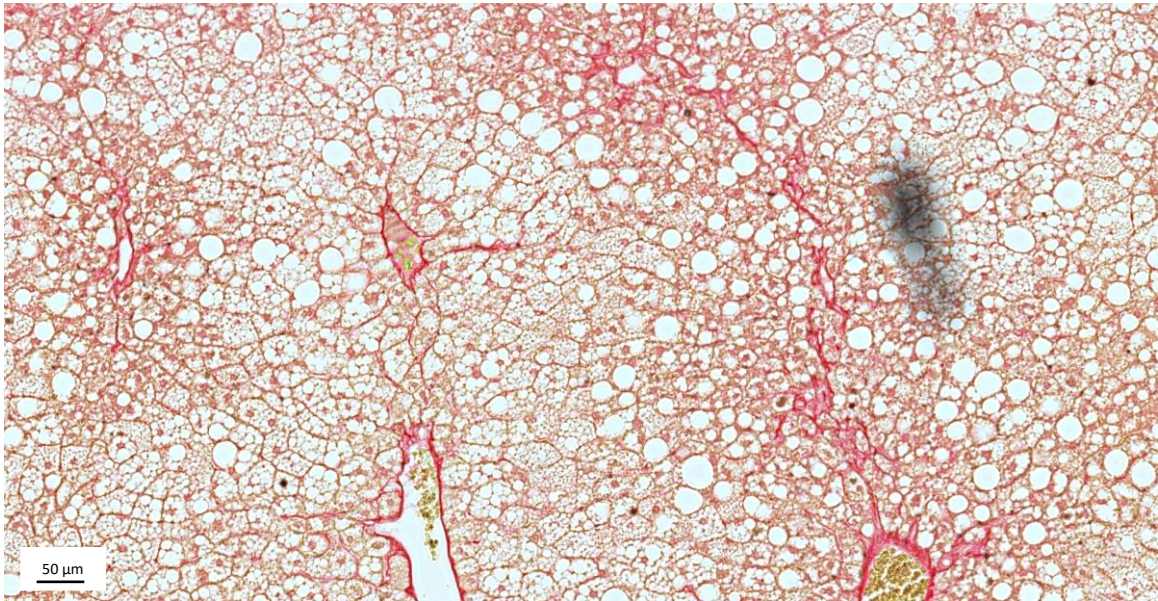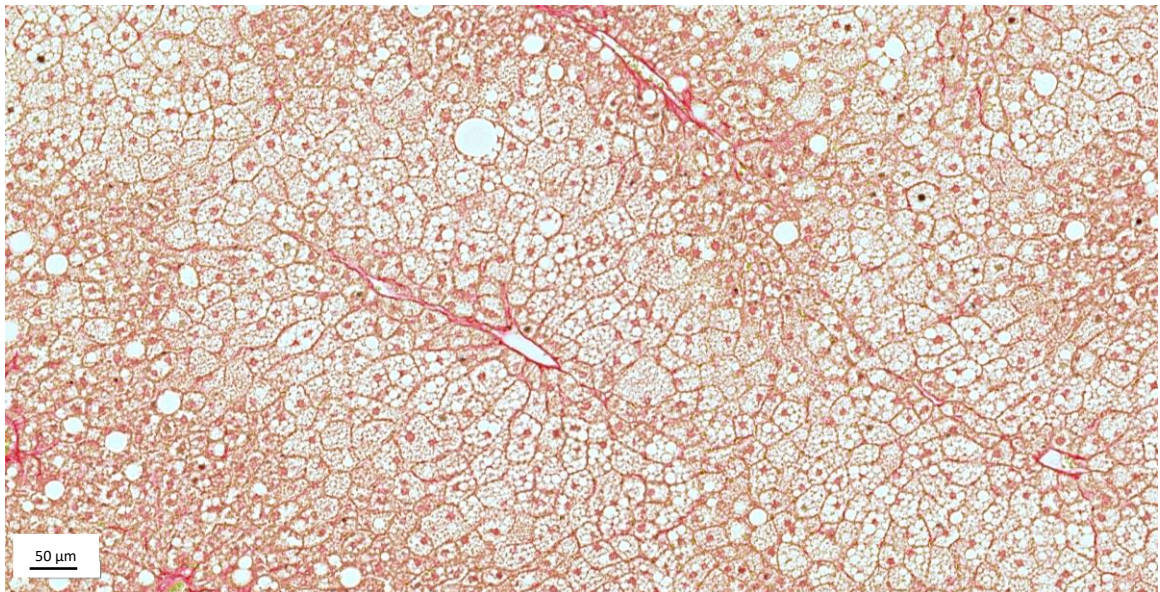



# HFHCD-C-6

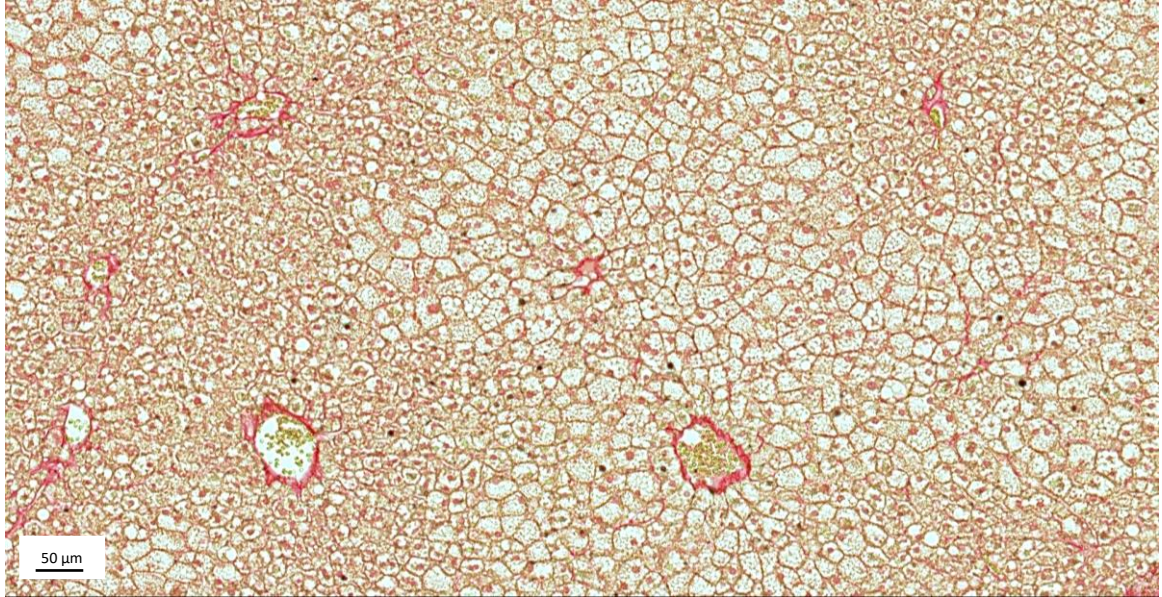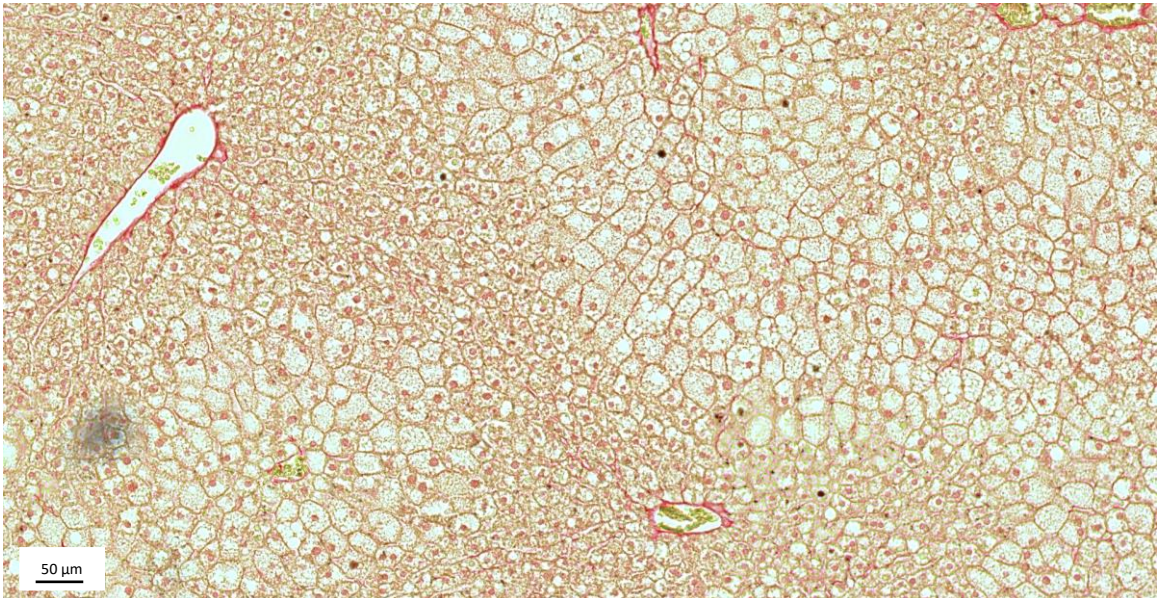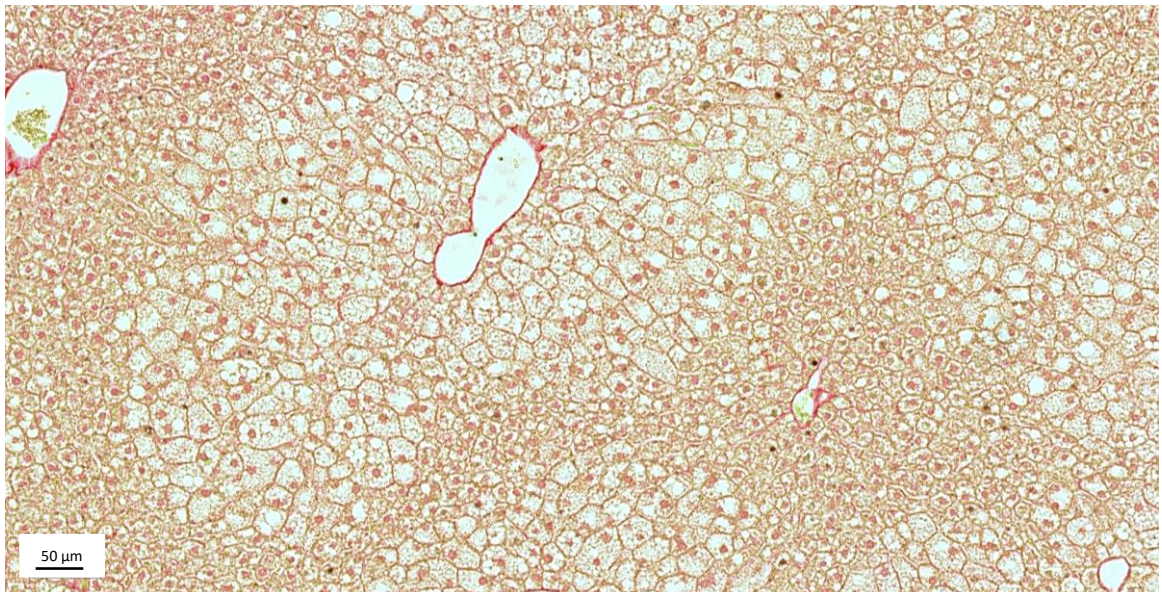



# HFHCD-C-7

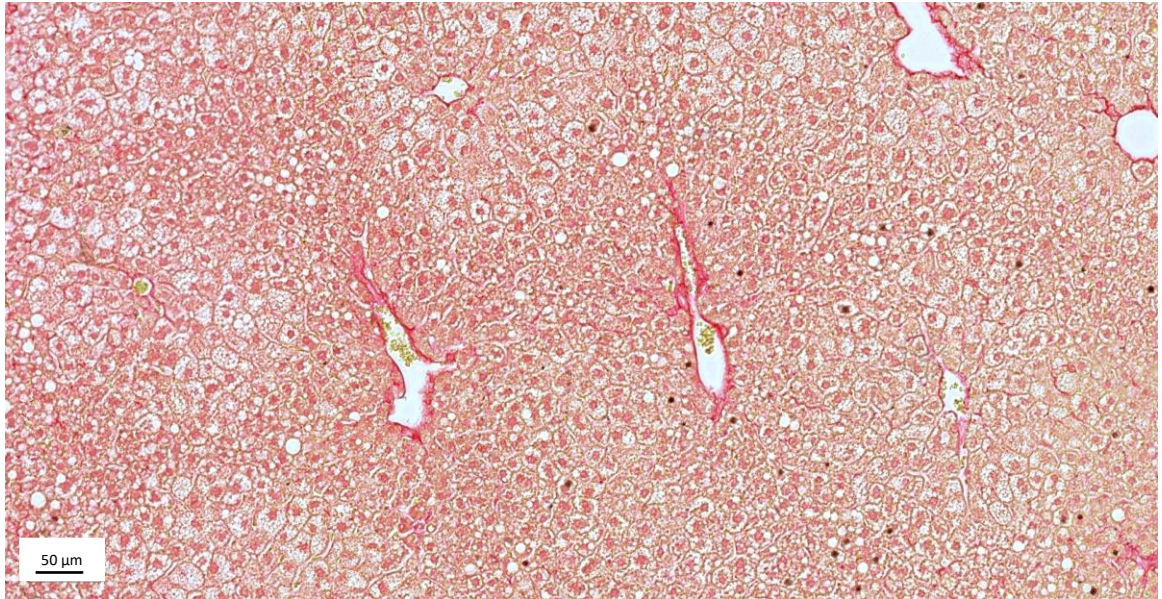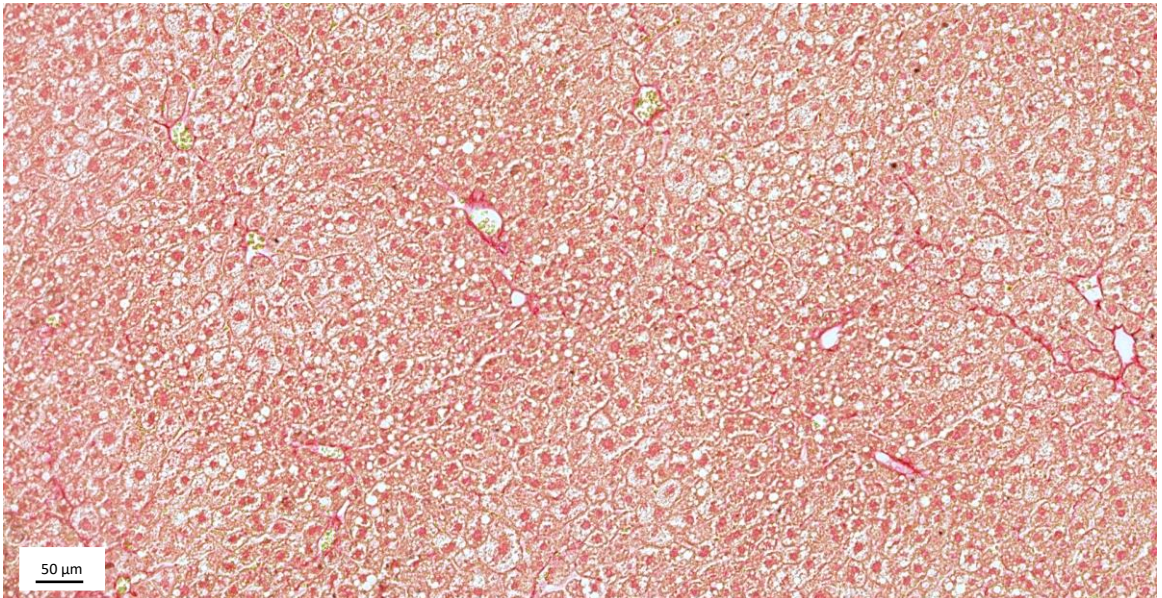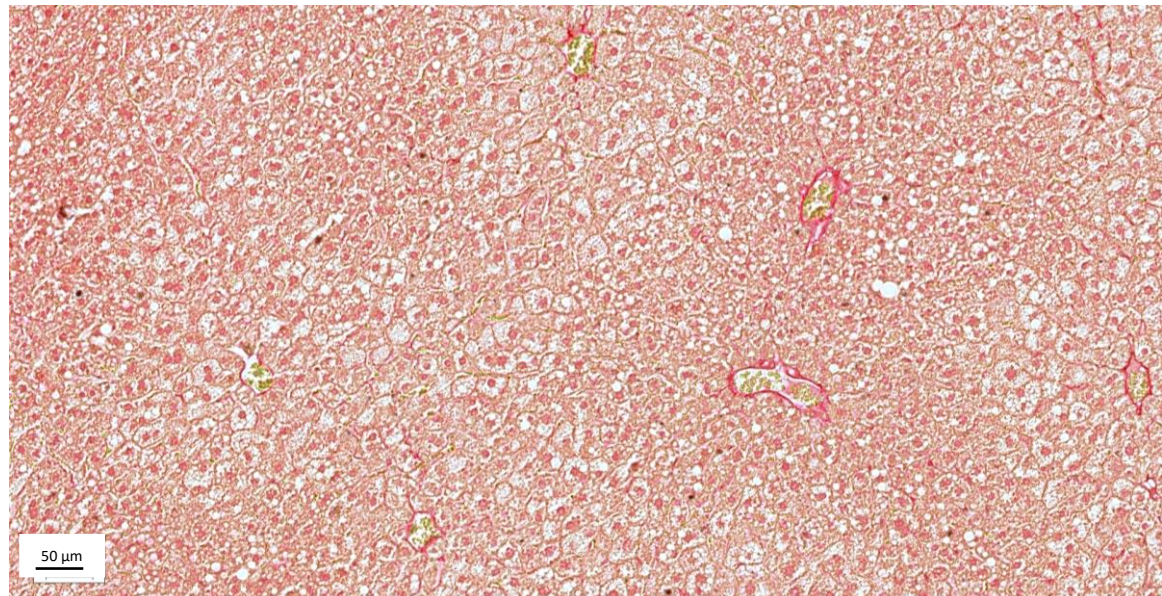



# HFHCD-C-8

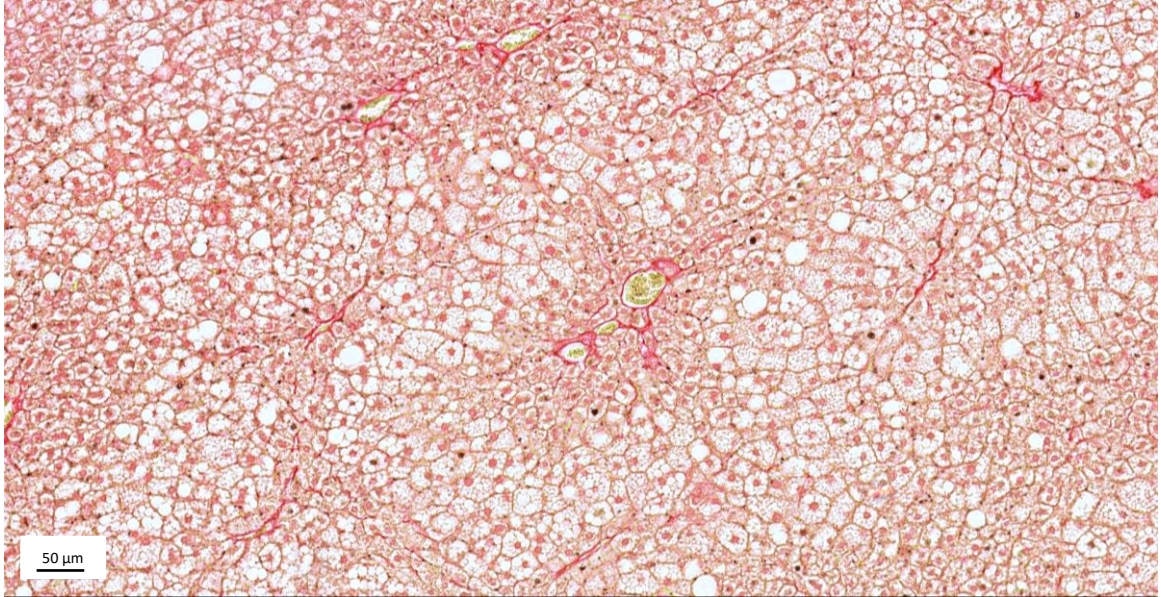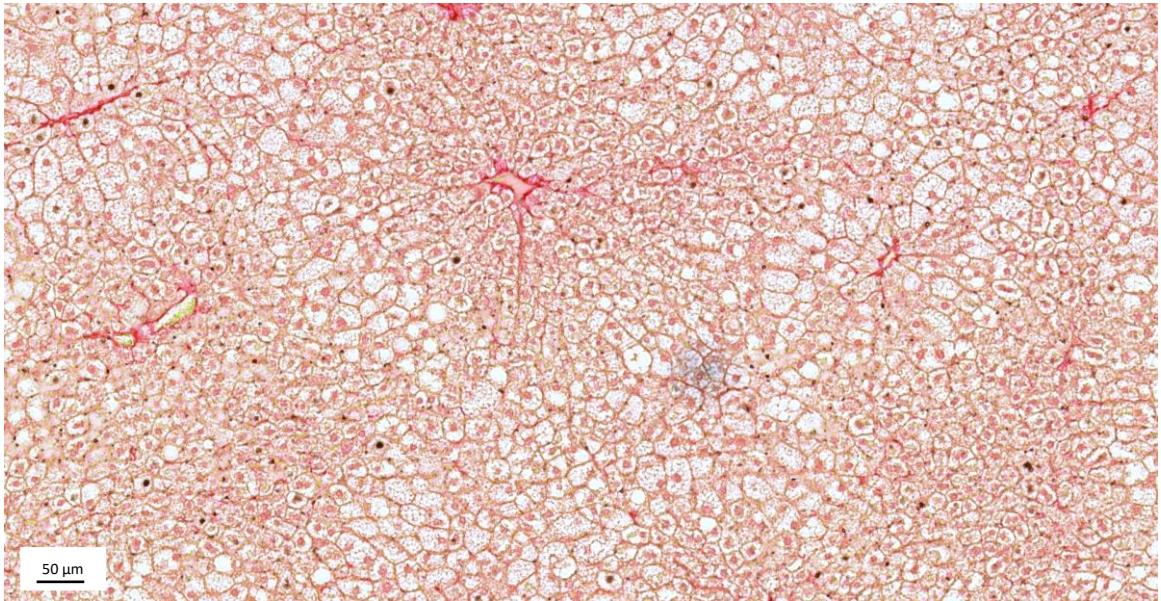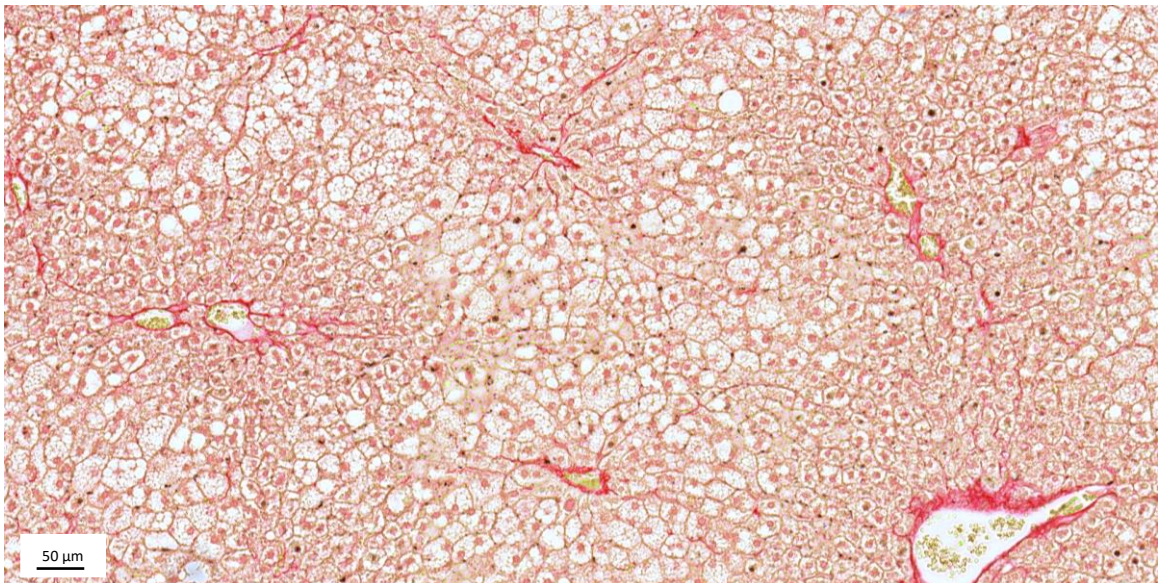



# HFHCD-C-9

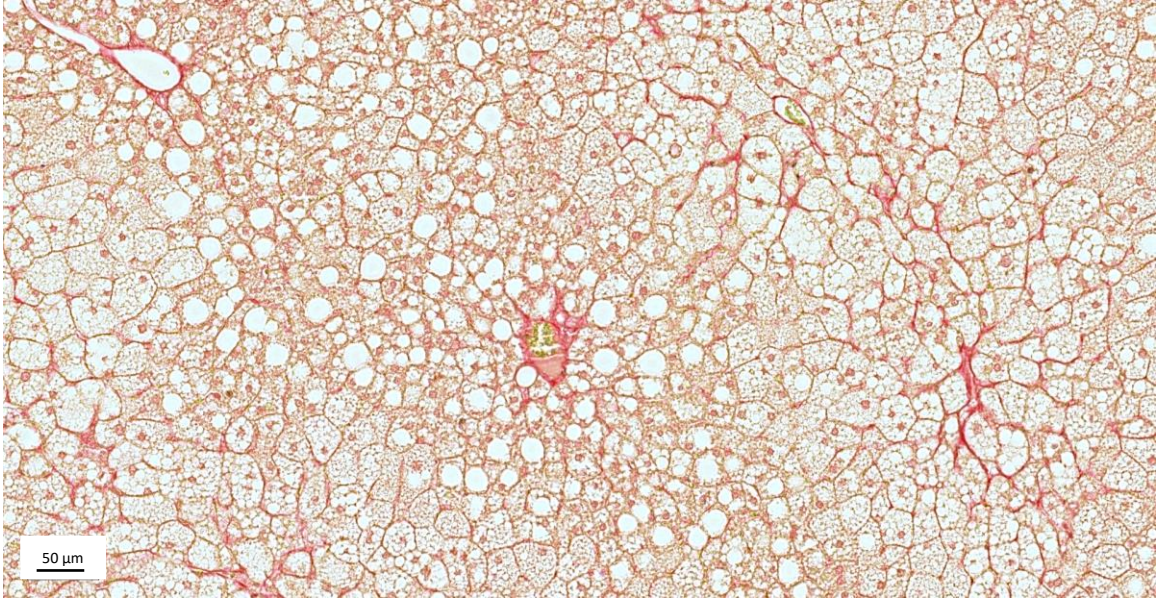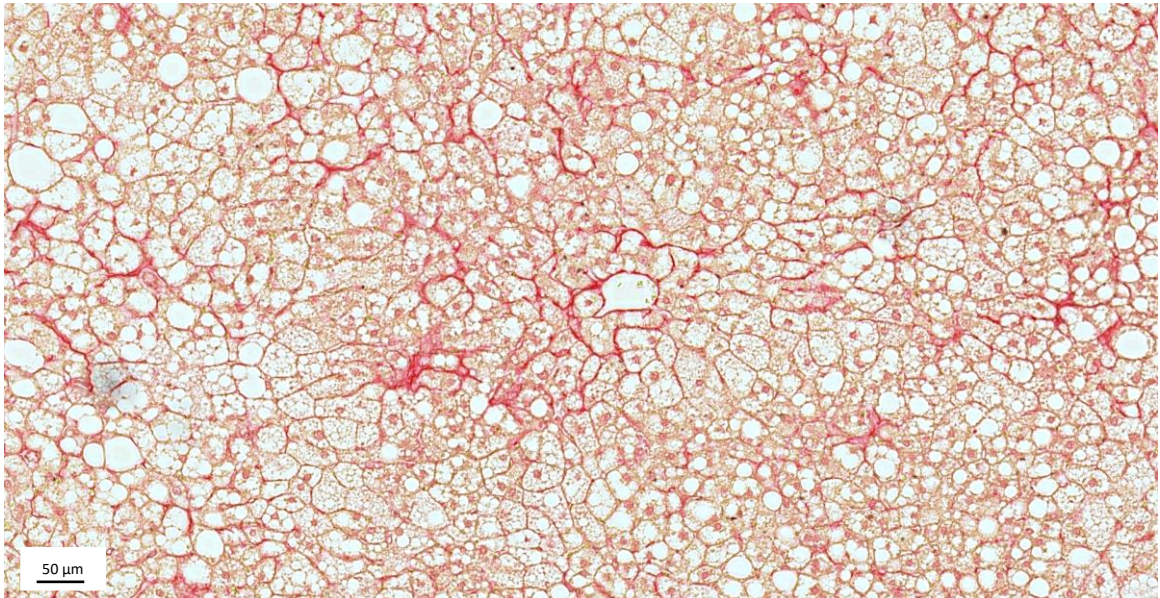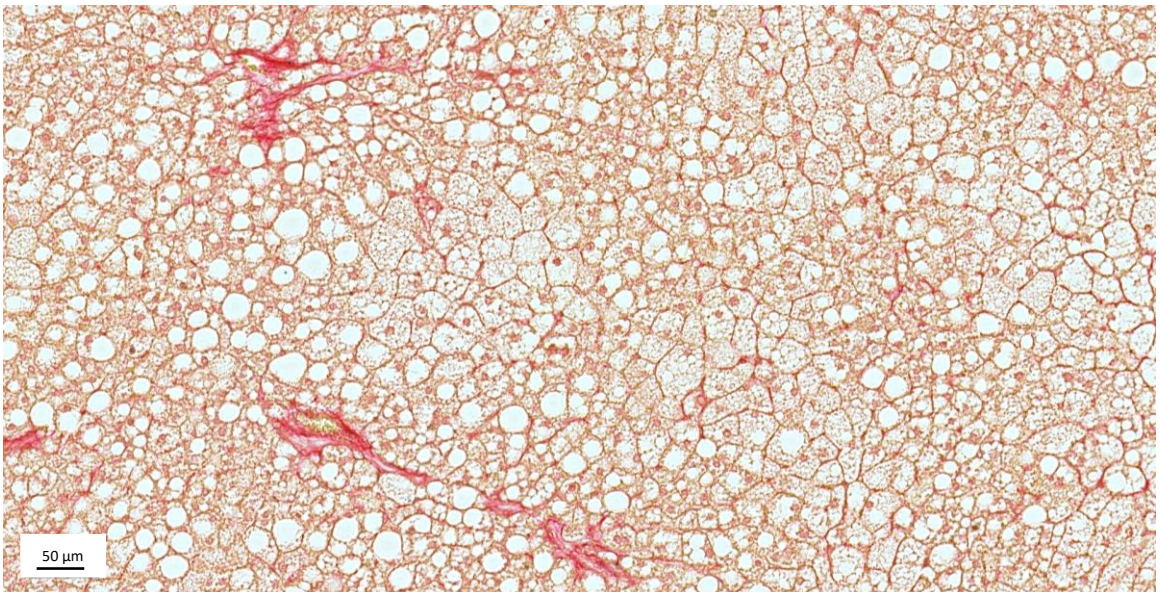



# HFHCD-C-10

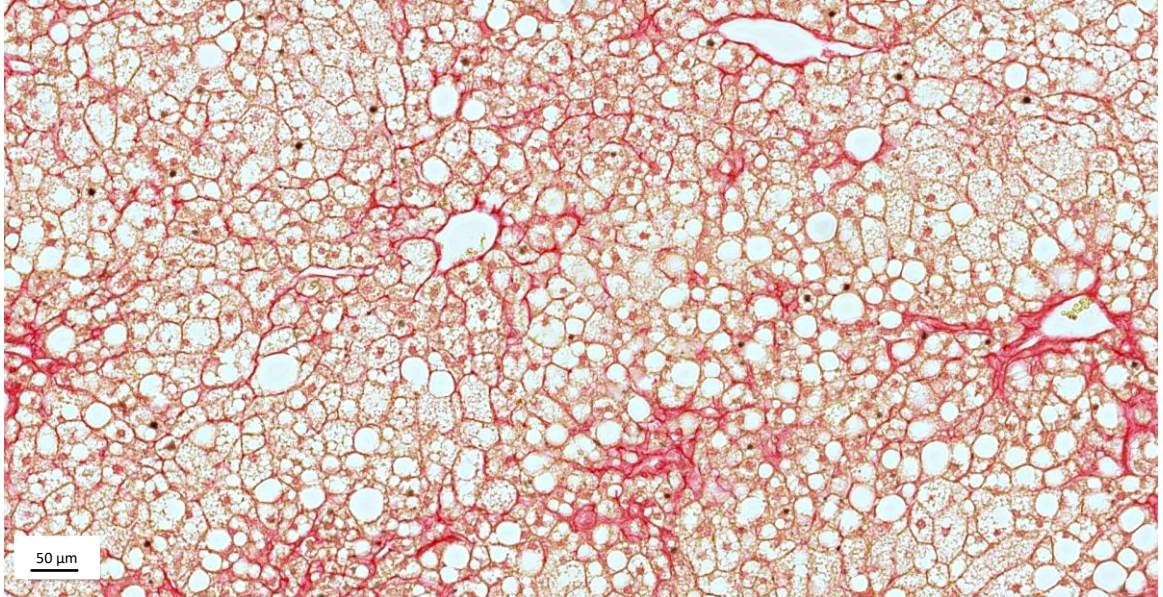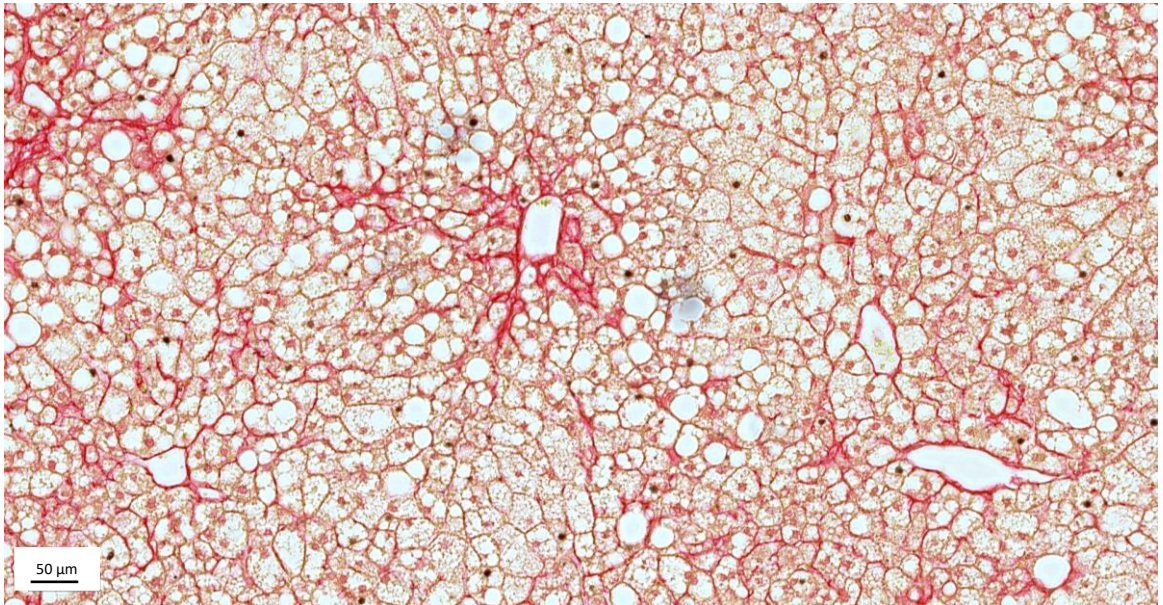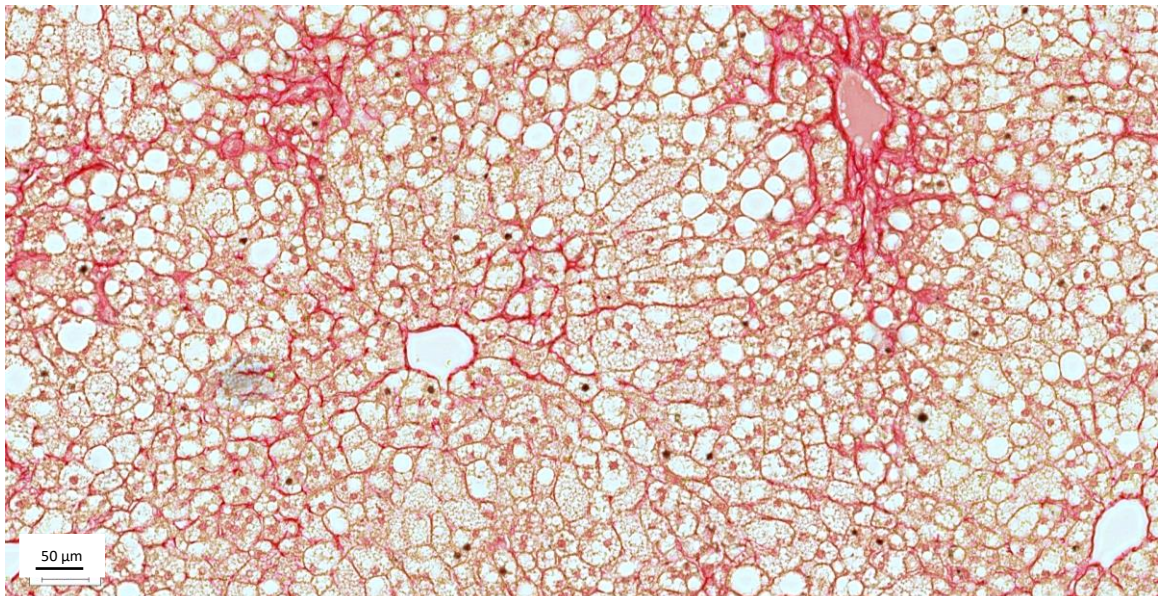



# HFHCD-C-11

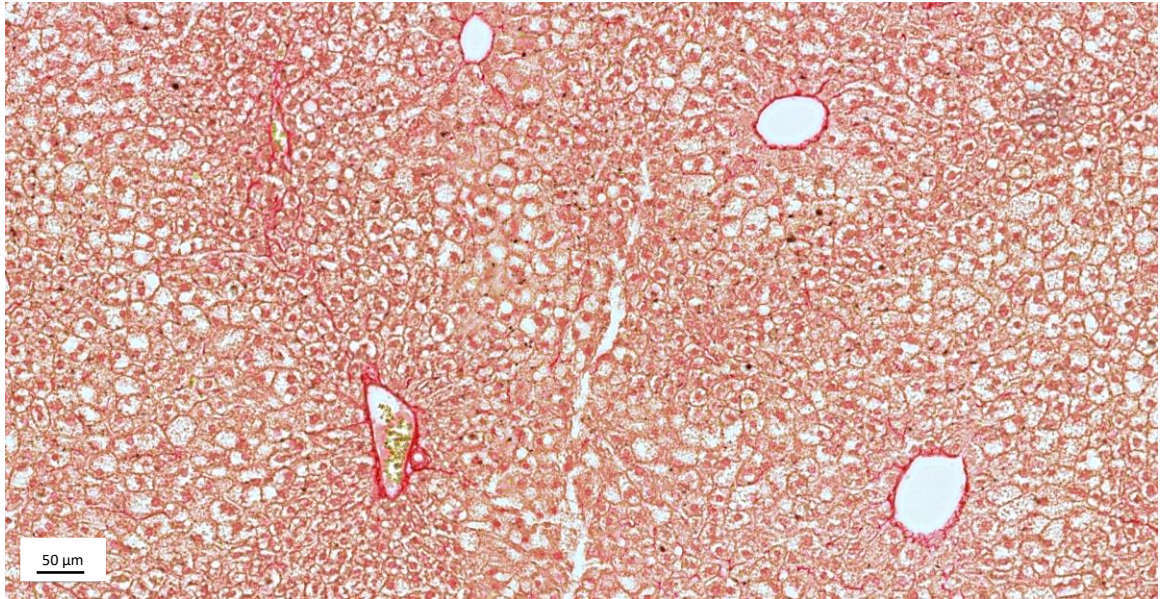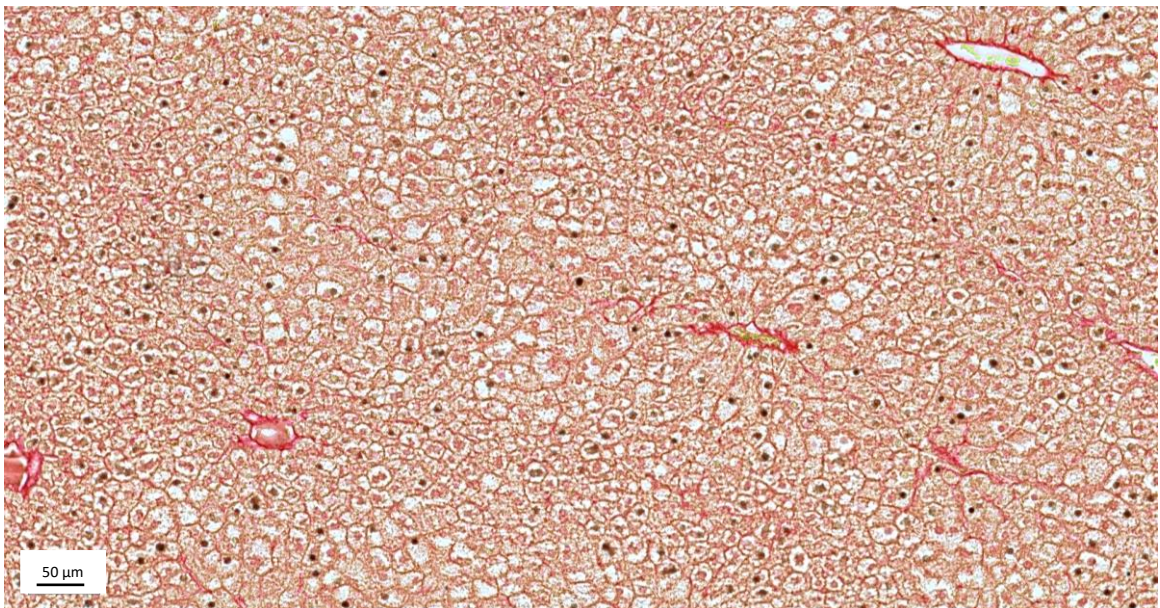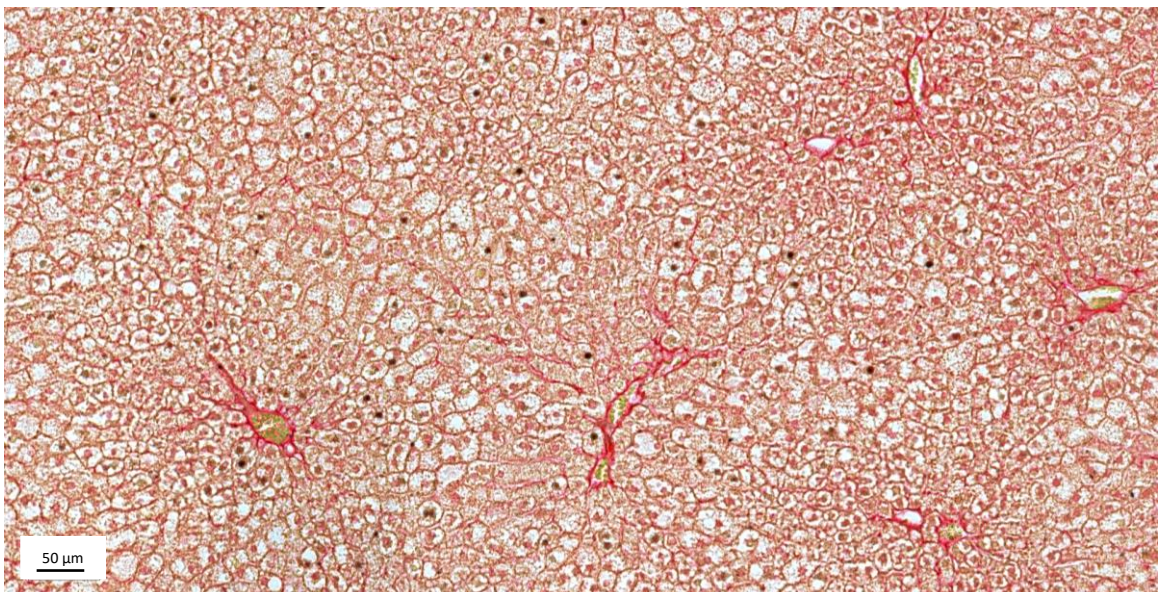



# HFHCD-C-12

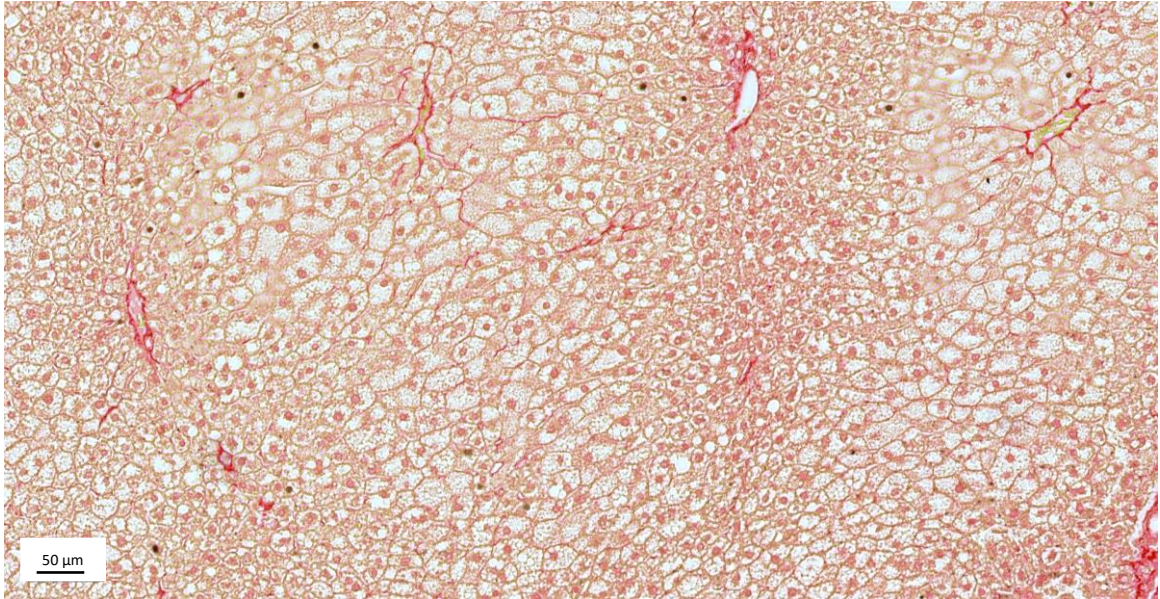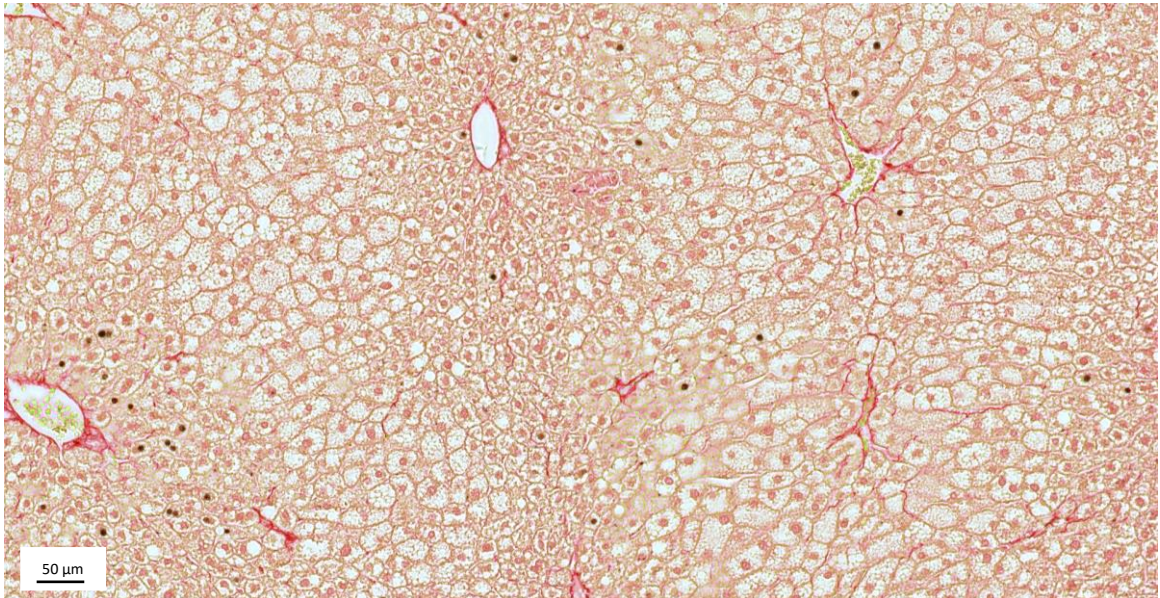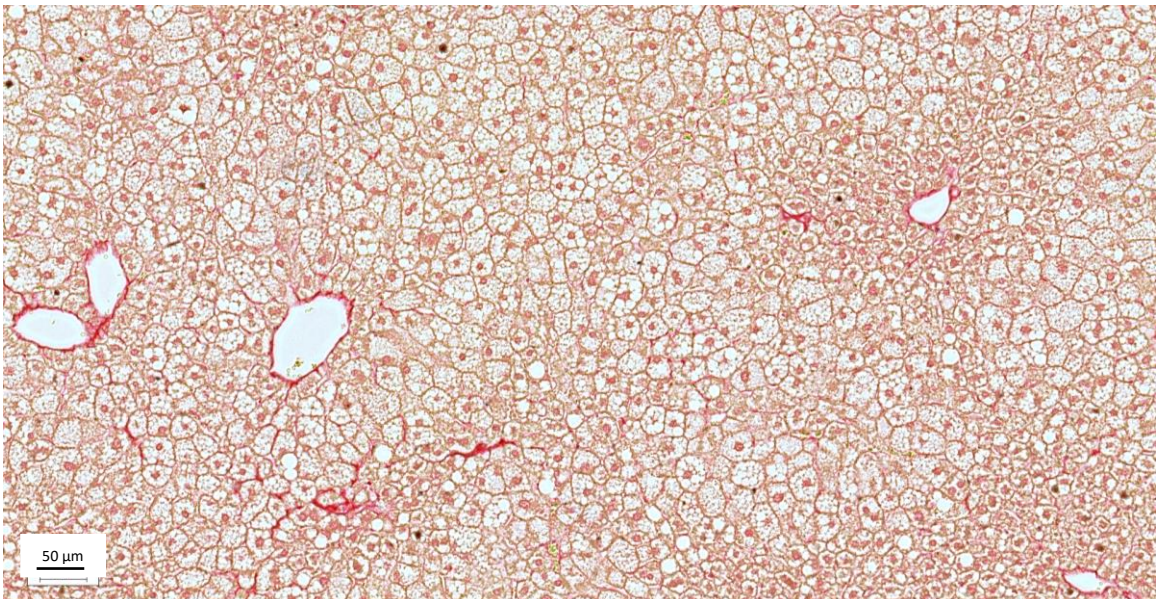

Supplement: 41564_2023_1418_MOESM14_ESM.pdf [file 41564_2023_1418_MOESM14_ESM.pdf]
