# Supplementary material for: Parabacteroides distasonis uses dietary inulin to suppress NASH via its metabolite pentadecanoic acid
Source: PubMed Central journal article supplement (PMC10390331; doi:10.1038/s41564-023-01418-7), 2023-06-29

Figure 5d

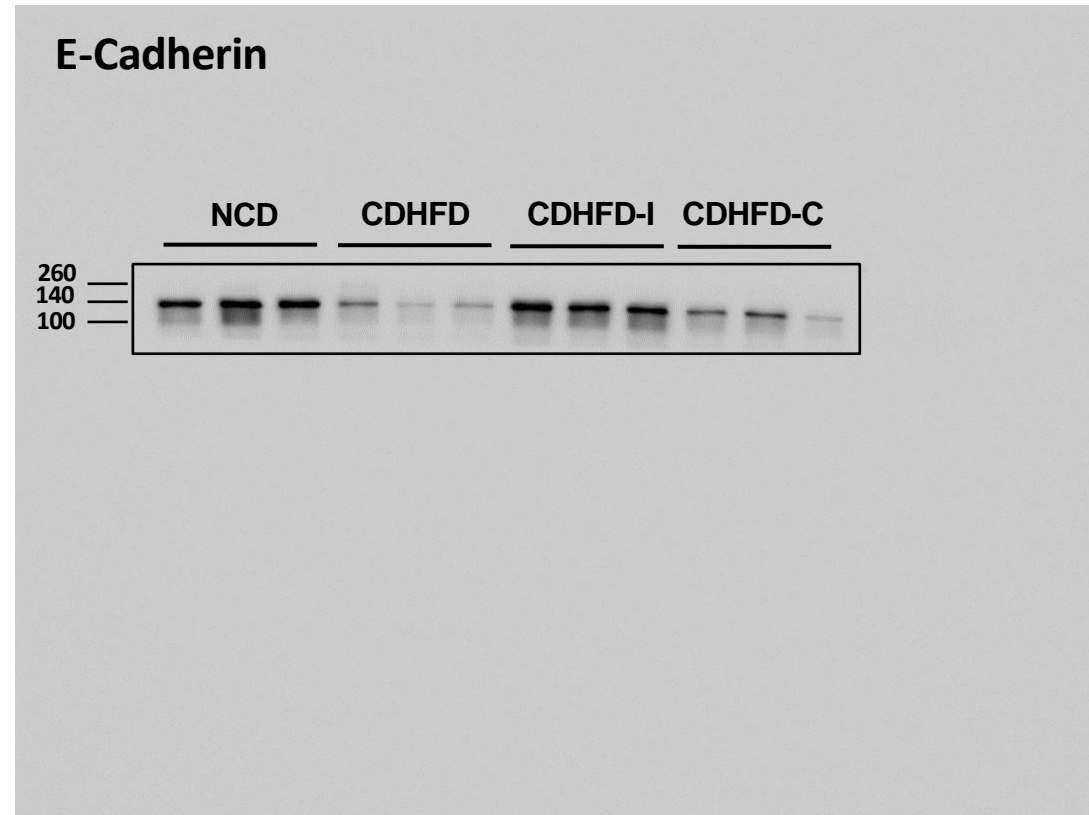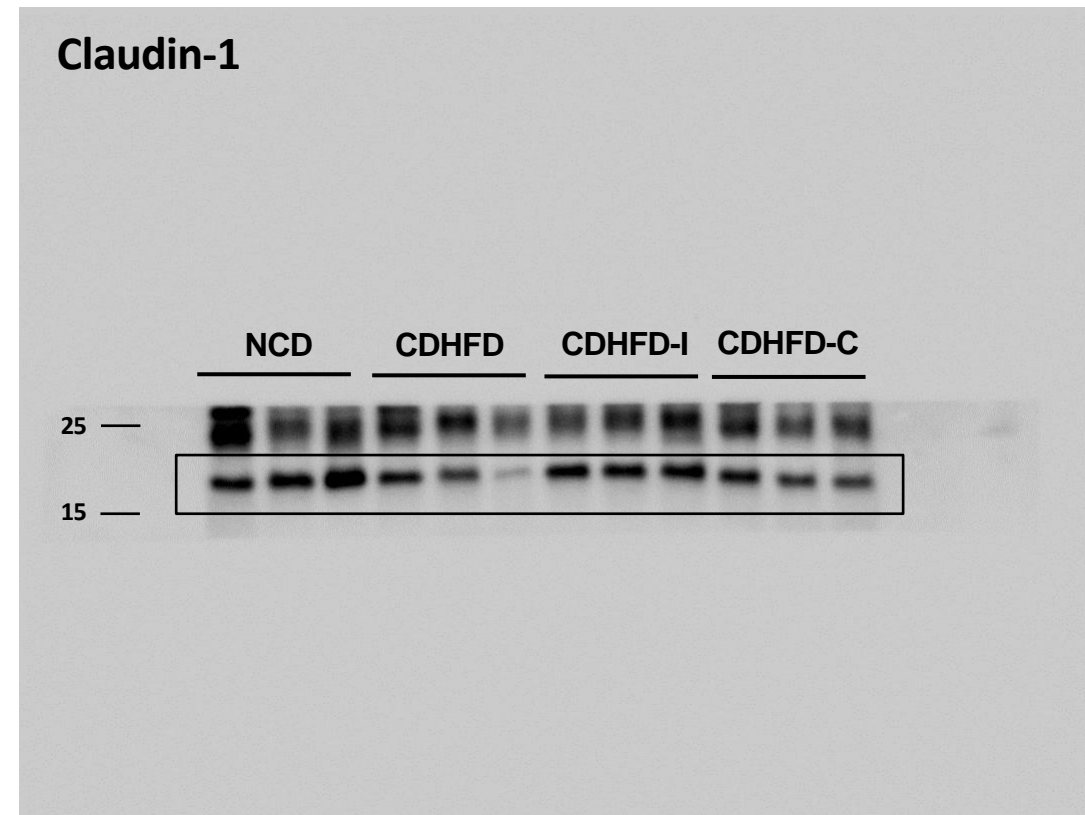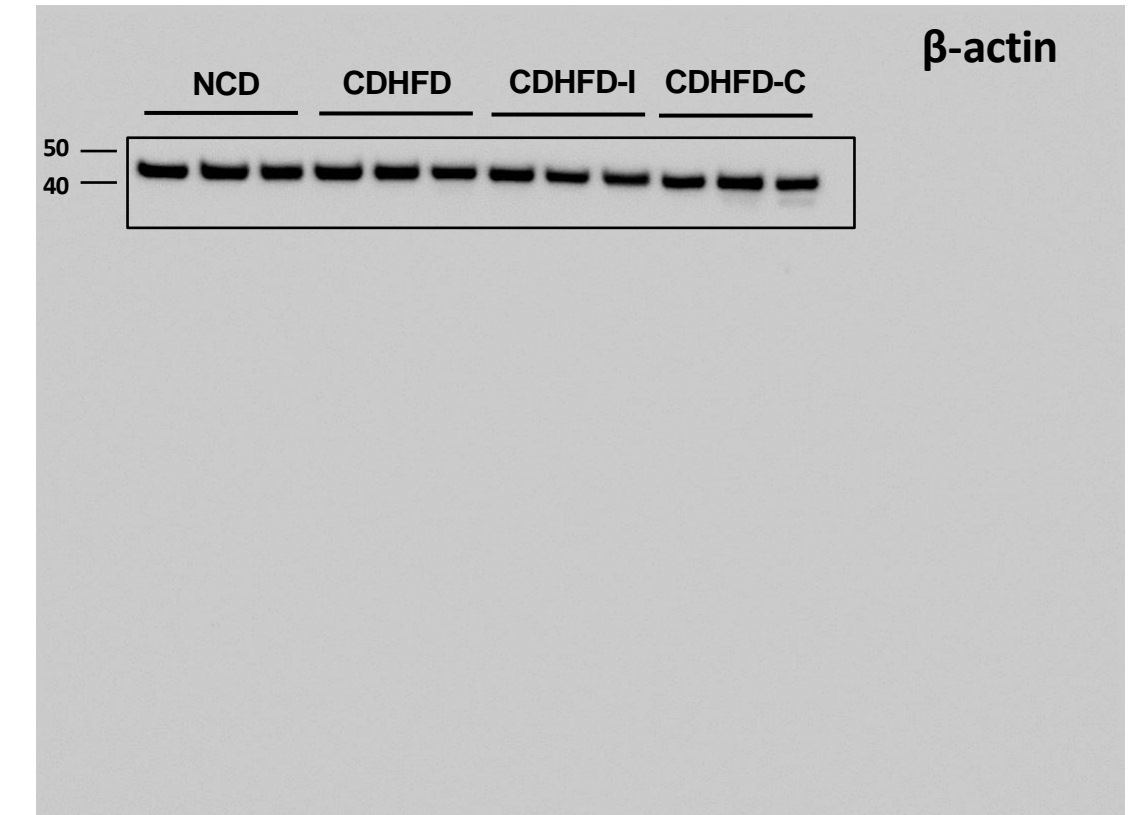

Figure 5d

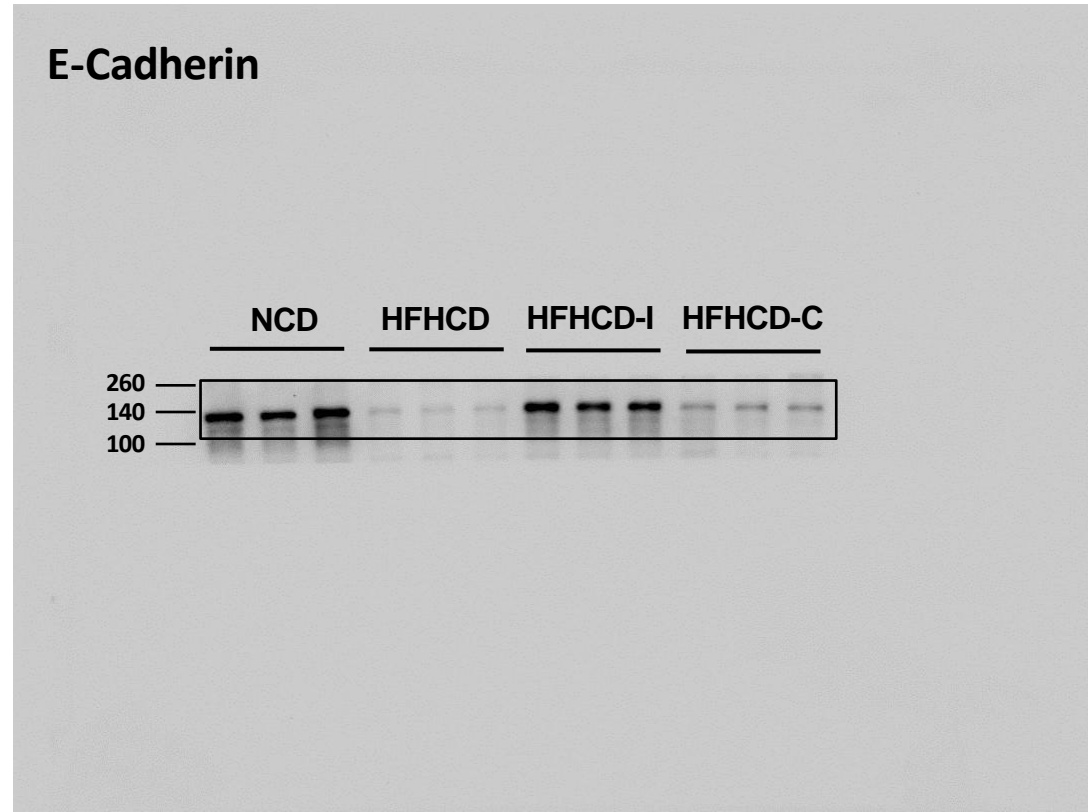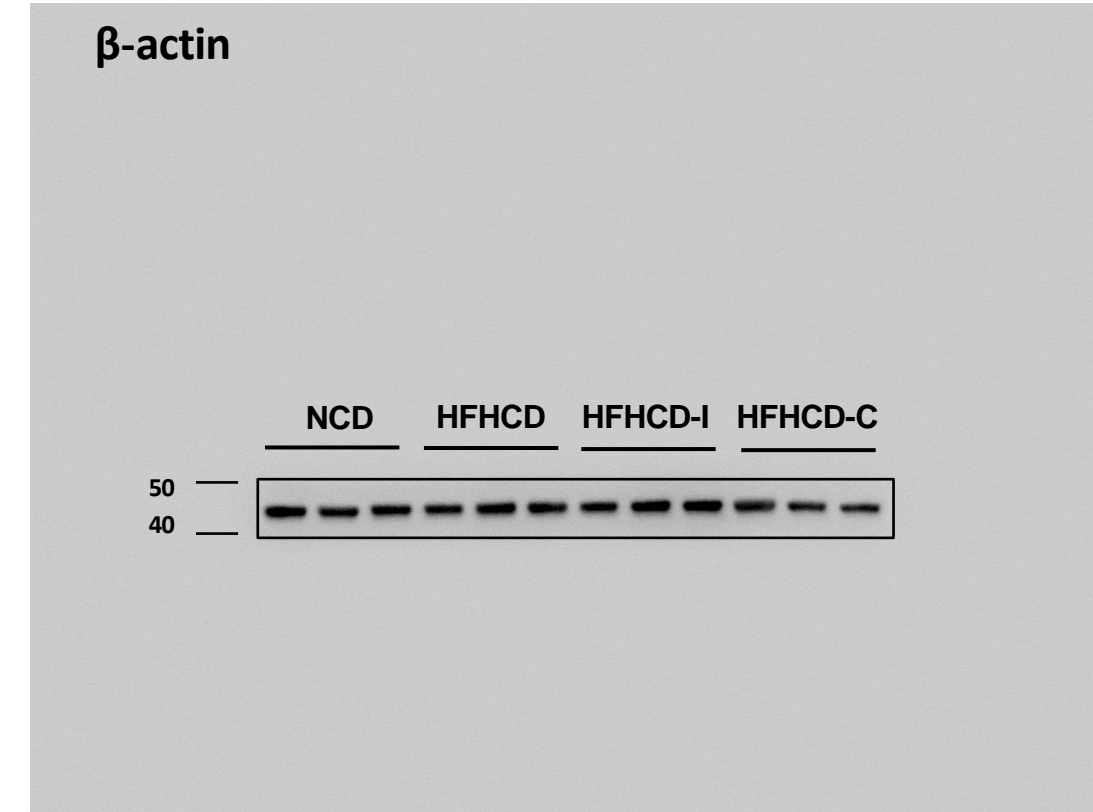

Figure 5d

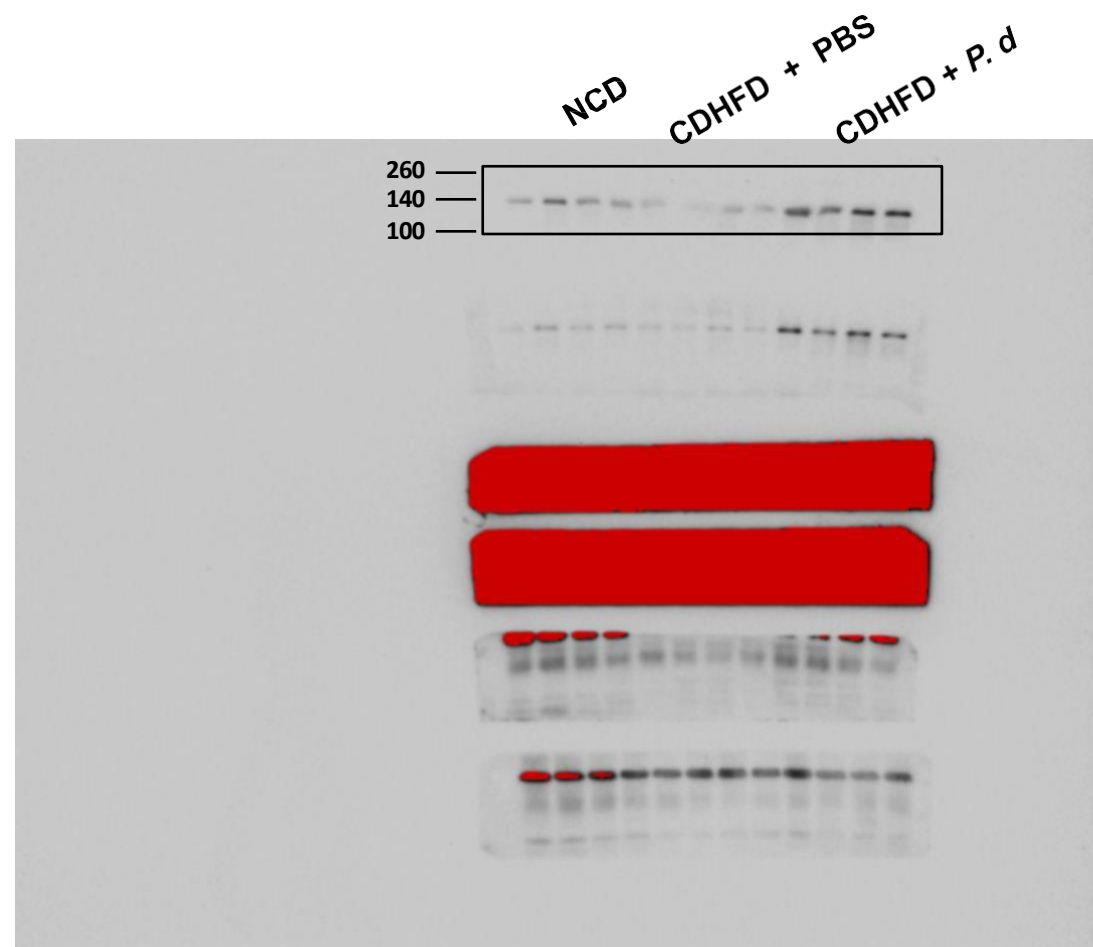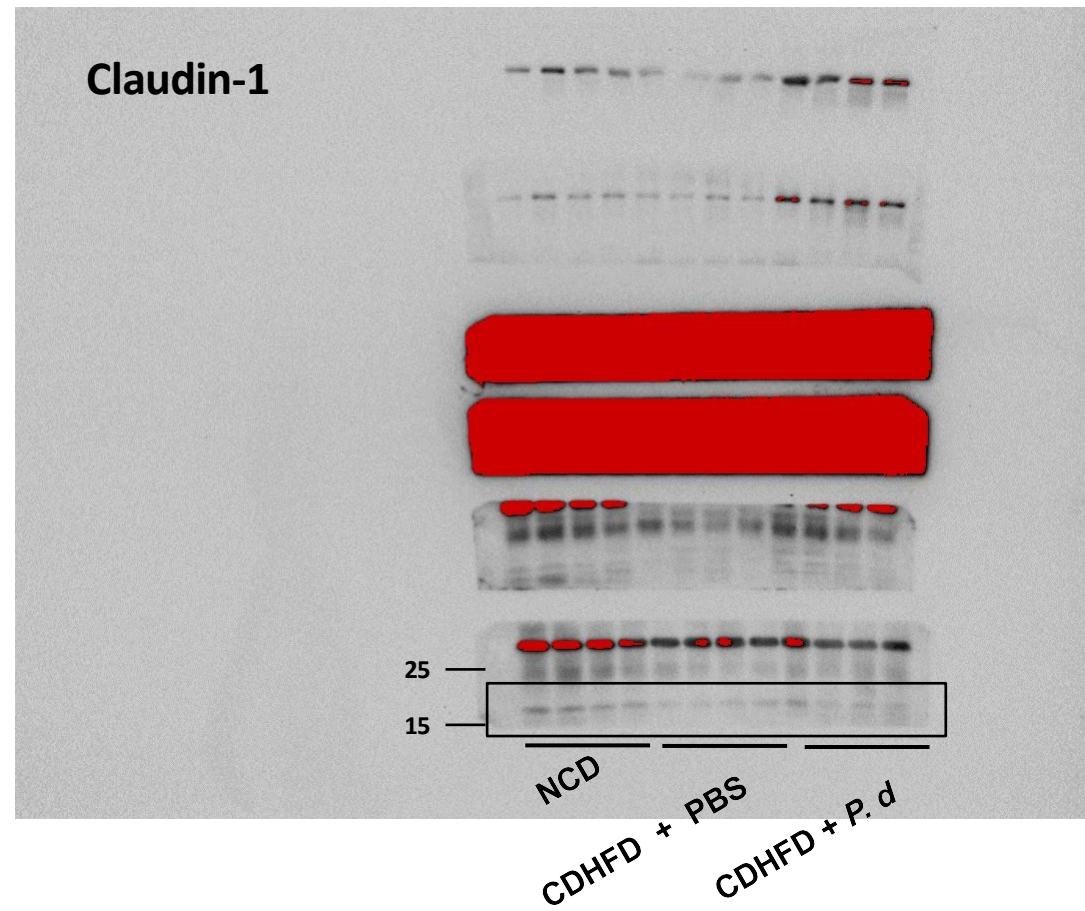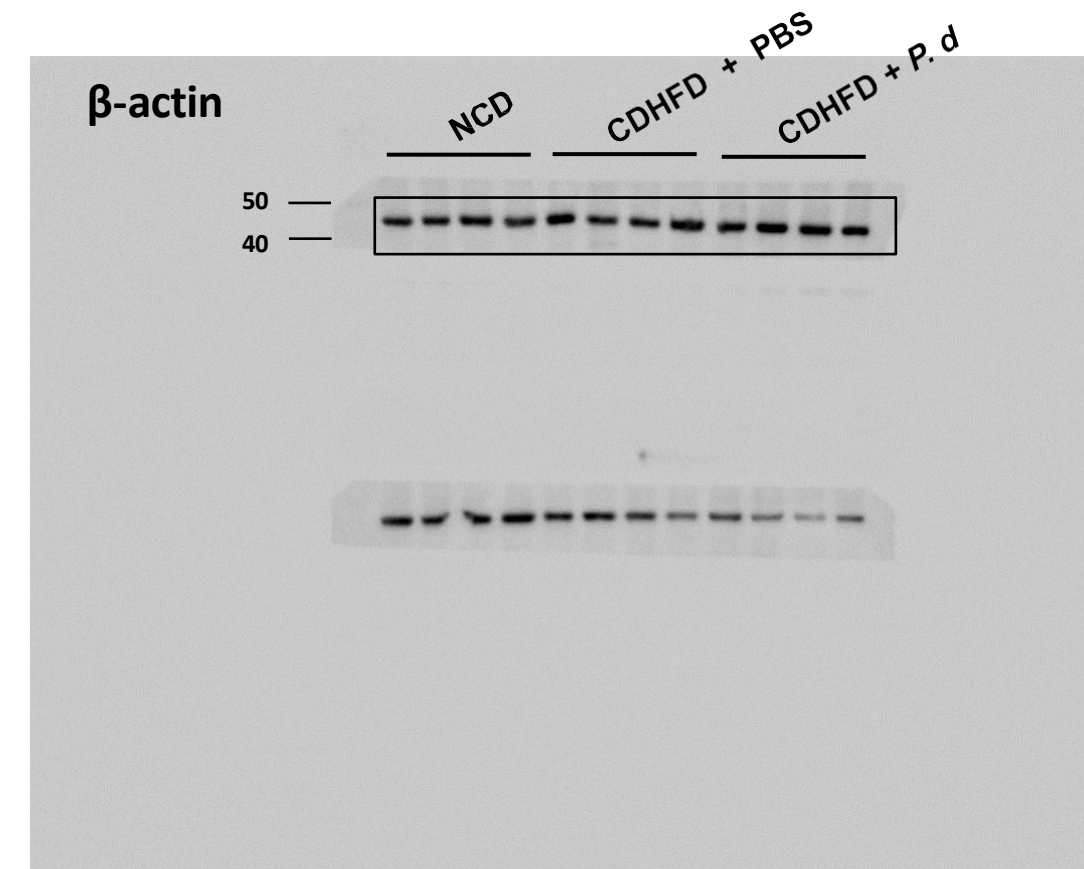

Figure 5d

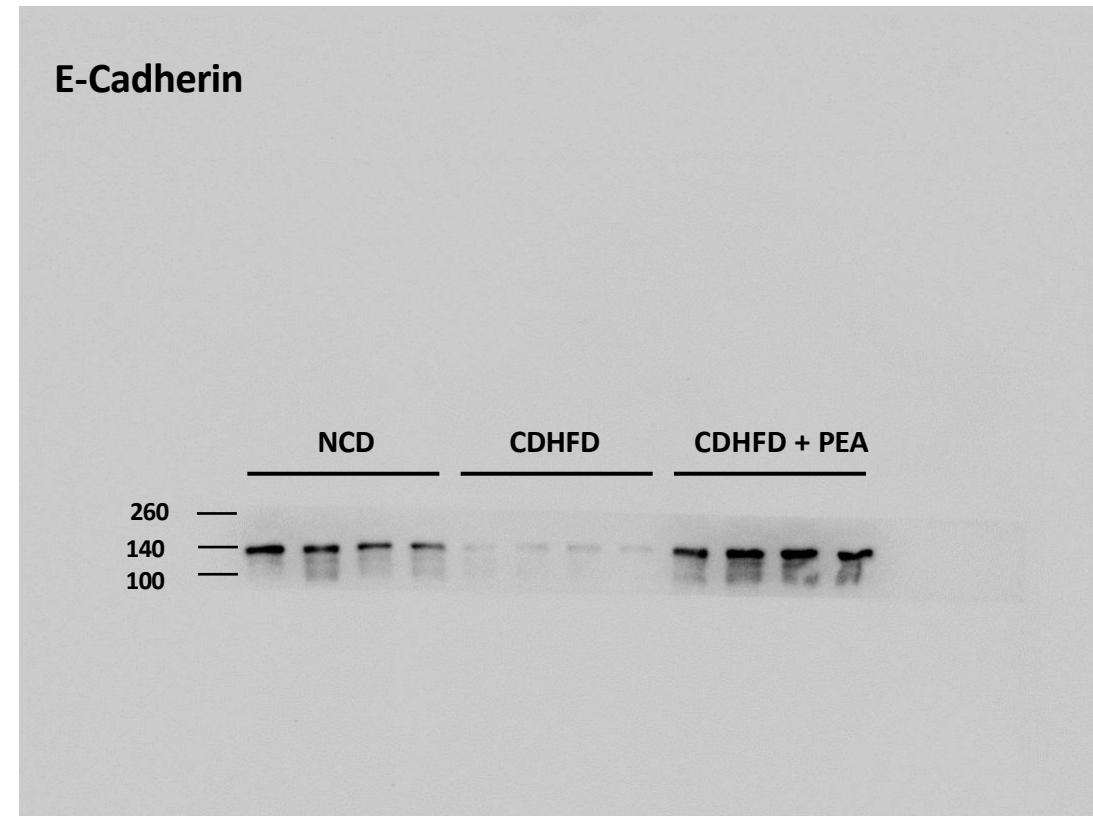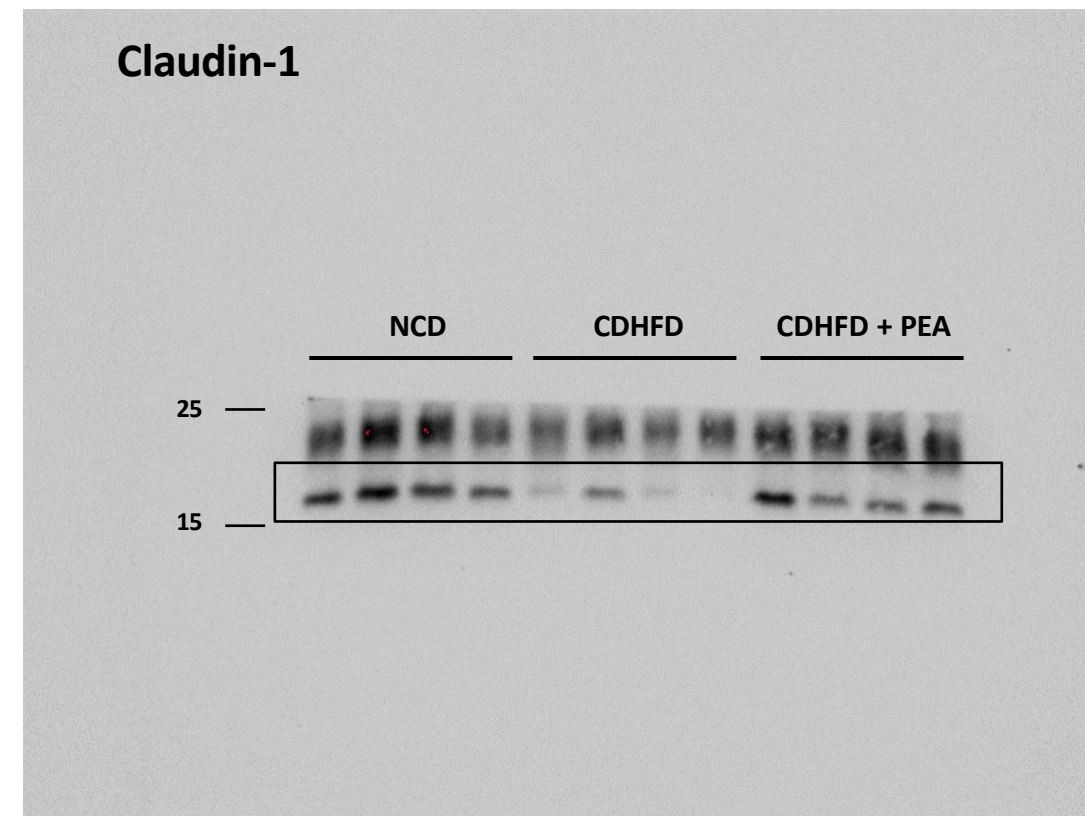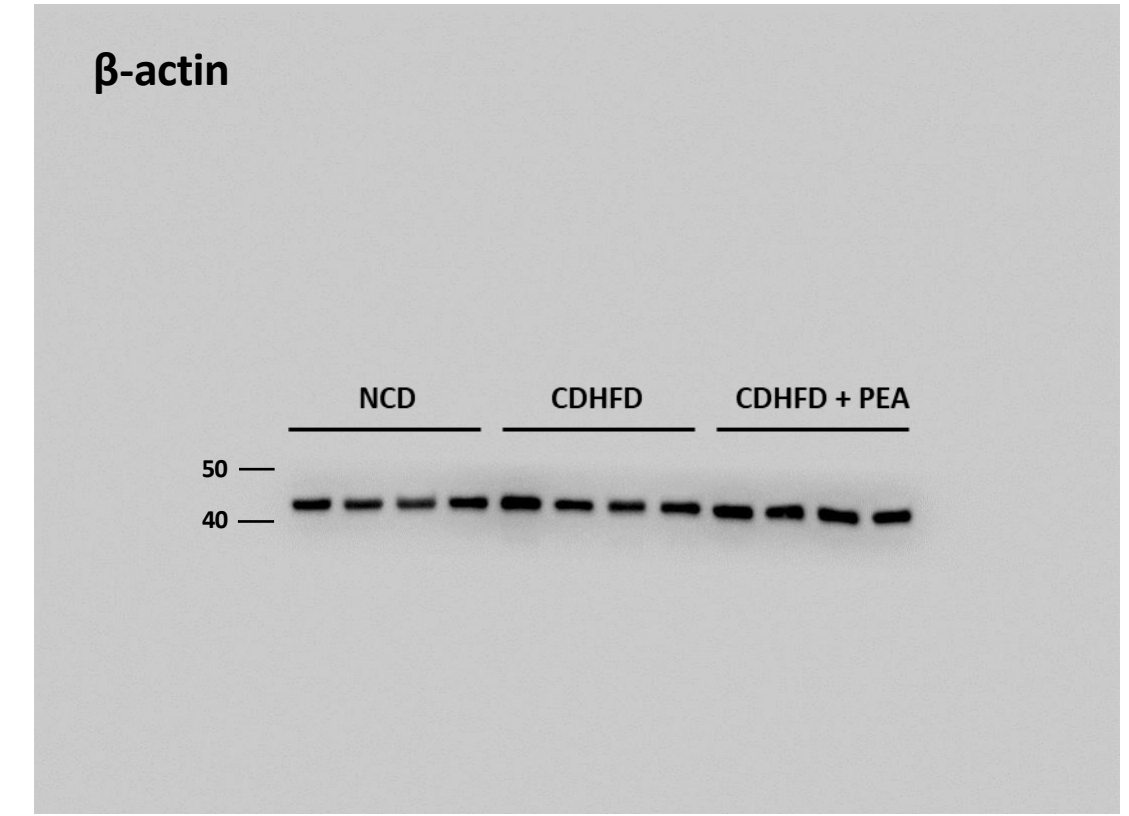

Supplement: 41564_2023_1418_MOESM12_ESM.pdf [file 41564_2023_1418_MOESM12_ESM.pdf]
